# Supplementary material for: A Stem-like Patient-Derived Ovarian Cancer Model of Platinum Resistance Reveals Dissociation of Stemness and Resistance
Source: MDPI journal article supplement (doi:10.3390/ijms25073843), 2024-03-29
Supplement: s1 [file s1]

**Table S1.** List of differentially expressed genes in PDX4 CR relative to PDX4 SE generated by DESeq2 analysis

| ENSEMBL_ID      | baseMean    | log2FoldChange | lfcSE       | stat         | pvalue      | padj        |
|-----------------|-------------|----------------|-------------|--------------|-------------|-------------|
| ENSG00000000003 | 40.59986718 | -0.35429728    | 0.274947356 | -1.288600429 | 0.197537034 | 0.349075698 |
| ENSG00000000419 | 428.4565816 | -0.142497551   | 0.098644362 | -1.444558498 | 0.148581937 | 0.28288567  |
| ENSG00000000457 | 105.8455314 | 0.004146622    | 0.172980401 | 0.02397163   | 0.980875238 | 0.990179984 |
| ENSG00000000460 | 119.7737167 | 0.013348296    | 0.169473231 | 0.078763447  | 0.937220778 | 0.965610993 |
| ENSG00000000971 | 1583.423364 | -0.339207603   | 0.078016243 | -4.347909973 | 1.37E-05    | 9.57E-05    |
| ENSG00000001084 | 1689.17011  | 4.21014563     | 0.086992924 | 48.39641492  | 0           | 0           |
| ENSG00000001167 | 446.3020695 | -0.024597817   | 0.09720158  | -0.253059851 | 0.800221963 | 0.880924836 |
| ENSG00000001460 | 81.57840761 | -0.060706794   | 0.199694523 | -0.303998295 | 0.76112919  | 0.855668806 |
| ENSG00000001461 | 187.1915532 | -0.321289092   | 0.146285546 | -2.196314683 | 0.028069428 | 0.076324283 |
| ENSG00000001497 | 613.2490046 | 0.181135977    | 0.090717717 | 1.996699027  | 0.045857888 | 0.113951132 |
| ENSG00000001617 | 78.36764284 | -0.371397593   | 0.202671616 | -1.832509164 | 0.066875598 | 0.15349698  |
| ENSG00000001629 | 348.7071257 | 0.011520765    | 0.108583337 | 0.106100671  | 0.915502479 | 0.954364625 |
| ENSG00000001630 | 55.68681438 | 0.475792767    | 0.262448412 | 1.812900152  | 0.069847223 | 0.158761155 |
| ENSG00000001631 | 137.7896528 | -0.214258157   | 0.160495673 | -1.334977784 | 0.181883618 | 0.328691519 |
| ENSG00000002016 | 43.25408199 | 0.114692183    | 0.270740742 | 0.423623657  | 0.6718403   | 0.790794427 |
| ENSG00000002330 | 112.5164289 | 0.298876406    | 0.178351016 | 1.675776303  | 0.093782017 | 0.199578607 |
| ENSG00000002549 | 352.0957271 | 0.338560778    | 0.10914106  | 3.102047747  | 0.00192187  | 0.007909183 |
| ENSG00000002586 | 1029.585846 | 0.541452485    | 0.081101661 | 6.67621939   | 2.45E-11    | 4.15E-10    |
| ENSG00000002834 | 798.4529909 | -0.252243008   | 0.084674072 | -2.978987582 | 0.002892025 | 0.011185098 |
| ENSG00000002919 | 77.58454902 | -0.280325493   | 0.203279608 | -1.379014331 | 0.167890335 | 0.310105923 |
| ENSG00000003056 | 564.2283616 | 0.258856746    | 0.088821442 | 2.914349721  | 0.003564304 | 0.013412208 |
| ENSG00000003096 | 78.00559189 | 0.26846853     | 0.201576501 | 1.331844376  | 0.182911332 | 0.329996851 |
| ENSG00000003249 | 359.5801931 | 0.274171907    | 0.104781899 | 2.616596077  | 0.008881137 | 0.029209395 |
| ENSG00000003393 | 431.0186537 | -0.416354915   | 0.100006822 | -4.163265132 | 3.14E-05    | 0.000202246 |
| ENSG00000003402 | 367.999499  | -0.167125622   | 0.120413974 | -1.387925472 | 0.16515974  | 0.306432291 |
| ENSG00000003436 | 443.8603386 | -4.977707669   | 0.186195939 | -26.73370691 | 1.91E-157   | 9.94E-155   |
| ENSG00000003509 | 220.4103281 | -0.423783348   | 0.128139098 | -3.307213442 | 0.000942291 | 0.00426429  |
| ENSG00000003756 | 1072.219378 | -0.0180742     | 0.071125065 | -0.254118571 | 0.799403957 | 0.880792798 |
| ENSG00000003989 | 217.7315921 | -0.451706019   | 0.12772439  | -3.536568221 | 0.000405362 | 0.002006446 |
| ENSG00000004059 | 220.275701  | 0.572998082    | 0.12384087  | 4.626889974  | 3.71E-06    | 2.93E-05    |
| ENSG00000004139 | 420.0521618 | 0.226776257    | 0.097408271 | 2.328100639  | 0.01990676  | 0.057564343 |
| ENSG00000004142 | 612.4889898 | 0.029011239    | 0.085667142 | 0.338650718  | 0.734872871 | 0.836663901 |
| ENSG00000004399 | 973.8801386 | 1.640534889    | 0.086237055 | 19.02354961  | 1.09E-80    | 2.04E-78    |
| ENSG00000004455 | 512.4103474 | -0.236978149   | 0.090960151 | -2.605296336 | 0.009179483 | 0.030021932 |
| ENSG00000004478 | 1015.360089 | 0.208325886    | 0.080173748 | 2.598430169  | 0.009365109 | 0.030550787 |
| ENSG00000004487 | 1328.641659 | 0.139084172    | 0.068306045 | 2.036191258  | 0.041731154 | 0.105773641 |
| ENSG00000004534 | 1001.500619 | -0.011602143   | 0.078415643 | -0.147956989 | 0.882376712 | 0.935240751 |
| ENSG00000004660 | 165.5858285 | 1.027568845    | 0.143930951 | 7.139318119  | 9.38E-13    | 1.86E-11    |
| ENSG00000004700 | 200.7401961 | -0.129573836   | 0.131264058 | -0.987123497 | 0.3235821   | 0.495352851 |
| ENSG00000004766 | 67.88462671 | 0.157716382    | 0.228817217 | 0.689267986  | 0.49065464  | 0.650209975 |
| ENSG00000004777 | 55.83094121 | -0.120043489   | 0.240427492 | -0.499291857 | 0.617573791 | 0.751514768 |
| ENSG00000004779 | 838.0940494 | 0.362367294    | 0.098016562 | 3.697000662  | 0.000218162 | 0.001156859 |
| ENSG00000004864 | 169.8582811 | -0.775799983   | 0.147268512 | -5.267928461 | 1.38E-07    | 1.42E-06    |
| ENSG00000004866 | 191.1246944 | 0.444809025    | 0.138148751 | 3.219783183  | 0.001282876 | 0.005573943 |
| ENSG00000004897 | 845.0165815 | -0.016766417   | 0.079737507 | -0.210270139 | 0.83345684  | 0.902386945 |
| ENSG00000004961 | 131.1328716 | 0.250889553    | 0.171418583 | 1.46360767   | 0.143301176 | 0.275595785 |
| ENSG00000004975 | 528.6556523 | 0.268272481    | 0.094780246 | 2.830468296  | 0.004647992 | 0.016831745 |
| ENSG00000005007 | 591.0822676 | 0.023734346    | 0.090657118 | 0.26180345   | 0.793472979 | 0.876940593 |

|                 |             |              |             |              |             |             |
|-----------------|-------------|--------------|-------------|--------------|-------------|-------------|
| ENSG00000005022 | 2268.238954 | 0.223072817  | 0.064675483 | 3.449109428  | 0.000562439 | 0.002687622 |
| ENSG00000005059 | 150.2419536 | 0.205193629  | 0.158263328 | 1.296533011  | 0.194791915 | 0.346015632 |
| ENSG00000005073 | 104.0362267 | -0.36972443  | 0.178756313 | -2.068315366 | 0.038610378 | 0.099025009 |
| ENSG00000005075 | 245.1768107 | 0.484555919  | 0.121905622 | 3.974844719  | 7.04E-05    | 0.000419891 |
| ENSG00000005100 | 617.3667726 | 0.078865577  | 0.085653178 | 0.920754827  | 0.357178444 | 0.528469097 |
| ENSG00000005102 | 125.6211748 | -2.977893496 | 0.211960061 | -14.04931419 | 7.78E-45    | 6.87E-43    |
| ENSG00000005108 | 184.9935407 | -0.824914714 | 0.143385449 | -5.753127113 | 8.76E-09    | 1.08E-07    |
| ENSG00000005156 | 363.4329032 | 0.174268001  | 0.106895642 | 1.630262917  | 0.103045941 | 0.214677312 |
| ENSG00000005175 | 409.5213454 | -0.092685343 | 0.098902359 | -0.937139862 | 0.348686619 | 0.520620848 |
| ENSG00000005187 | 7.263415843 | -1.865889024 | 0.720032893 | -2.591394147 | 0.009558794 | 0.03108157  |
| ENSG00000005189 | 78.83300503 | -0.236014451 | 0.205036089 | -1.151087364 | 0.249696296 | 0.413789489 |
| ENSG00000005194 | 226.8440016 | 0.181146784  | 0.136432582 | 1.32773844   | 0.18426453  | 0.331713937 |
| ENSG00000005206 | 101.5063749 | -0.248276737 | 0.204875621 | -1.211841292 | 0.225573139 | 0.383961822 |
| ENSG00000005238 | 82.18132588 | -0.087861125 | 0.201566009 | -0.435892564 | 0.662914681 | 0.784604829 |
| ENSG00000005249 | 352.7246415 | 1.250506681  | 0.109019387 | 11.47049822  | 1.86E-30    | 1.03E-28    |
| ENSG00000005302 | 138.3234565 | 0.389766254  | 0.159377776 | 2.445549581  | 0.014463156 | 0.044127705 |
| ENSG00000005339 | 2147.615077 | 0.03539113   | 0.060550068 | 0.584493653  | 0.558888234 | 0.705699959 |
| ENSG00000005436 | 196.0365982 | 0.049359488  | 0.133647795 | 0.369325121  | 0.711885403 | 0.819996249 |
| ENSG00000005448 | 127.2504419 | 0.139072182  | 0.179188551 | 0.776122034  | 0.437676935 | 0.603314879 |
| ENSG00000005469 | 25.98250733 | -0.205808169 | 0.338122371 | -0.608679538 | 0.542736872 | 0.691942716 |
| ENSG00000005483 | 986.3050266 | 0.639336279  | 0.074237072 | 8.612089113  | 7.17E-18    | 2.11E-16    |
| ENSG00000005486 | 303.7184015 | 0.126357271  | 0.114895317 | 1.099759968  | 0.271436719 | 0.439119151 |
| ENSG00000005513 | 16.70758001 | 2.510385323  | 0.503554543 | 4.98532951   | 6.19E-07    | 5.74E-06    |
| ENSG00000005700 | 614.962276  | -0.154215666 | 0.083977506 | -1.836392545 | 0.066299621 | 0.152424023 |
| ENSG00000005801 | 247.5180544 | -0.282172016 | 0.122887991 | -2.296172427 | 0.021666024 | 0.061620297 |
| ENSG00000005810 | 1146.758245 | 0.066152343  | 0.07223454  | 0.915799328  | 0.359772156 | 0.531076027 |
| ENSG00000005812 | 143.2115773 | 0.218756135  | 0.159733487 | 1.369507041  | 0.170840835 | 0.313921637 |
| ENSG00000005882 | 261.6879307 | 0.096061988  | 0.118165127 | 0.812947017  | 0.416248436 | 0.584061711 |
| ENSG00000005884 | 51.84807895 | -0.983643227 | 0.258991652 | -3.797972707 | 0.000145884 | 0.000808059 |
| ENSG00000005889 | 541.335623  | -0.172844805 | 0.093904415 | -1.840646202 | 0.065673423 | 0.151355958 |
| ENSG00000005893 | 312.4608514 | 0.31028105   | 0.109008594 | 2.846390731  | 0.00442179  | 0.016137409 |
| ENSG00000005961 | 19.62805734 | -0.561662866 | 0.413646832 | -1.357831905 | 0.174517028 | 0.318907337 |
| ENSG00000006007 | 415.4254562 | 0.195323236  | 0.09879492  | 1.977057497  | 0.048035131 | 0.118273355 |
| ENSG00000006015 | 126.4113084 | -0.004129637 | 0.162559944 | -0.025403782 | 0.979732895 | 0.989786143 |
| ENSG00000006016 | 14.2940776  | 0.322804406  | 0.506489837 | 0.637336394  | 0.52390575  | 0.677354147 |
| ENSG00000006025 | 8.661726004 | -2.66600567  | 0.746813299 | -3.569842256 | 0.000357196 | 0.001795825 |
| ENSG00000006062 | 137.5301489 | -0.153068293 | 0.158465995 | -0.965937787 | 0.334075313 | 0.505990311 |
| ENSG00000006071 | 14.91212167 | -1.057270646 | 0.465044586 | -2.273482324 | 0.02299713  | 0.064659865 |
| ENSG00000006118 | 491.9679166 | 0.119524488  | 0.103872054 | 1.150689558  | 0.249859974 | 0.413838003 |
| ENSG00000006125 | 1141.309134 | -0.540204054 | 0.070201038 | -7.695100664 | 1.41E-14    | 3.30E-13    |
| ENSG00000006194 | 142.5398974 | 0.033197074  | 0.159278561 | 0.208421483  | 0.834899884 | 0.903322704 |
| ENSG00000006282 | 80.58569165 | -0.350663885 | 0.200905302 | -1.74541877  | 0.080912001 | 0.178145905 |
| ENSG00000006283 | 86.3886801  | -0.93523704  | 0.194627746 | -4.805260607 | 1.55E-06    | 1.31E-05    |
| ENSG00000006327 | 101.3714916 | 0.137479711  | 0.189310978 | 0.726210983  | 0.46770944  | 0.629756504 |
| ENSG00000006432 | 114.7213582 | -0.901787957 | 0.174247772 | -5.175319878 | 2.28E-07    | 2.27E-06    |
| ENSG00000006451 | 224.5132658 | -0.170744675 | 0.127909777 | -1.334883693 | 0.181914416 | 0.328704888 |
| ENSG00000006453 | 387.1915411 | -0.285213787 | 0.101533299 | -2.809066488 | 0.004968538 | 0.01781344  |
| ENSG00000006459 | 168.39475   | 0.970455191  | 0.145446173 | 6.672263507  | 2.52E-11    | 4.26E-10    |
| ENSG00000006468 | 570.6057082 | 1.012277183  | 0.090142438 | 11.2297516   | 2.91E-29    | 1.53E-27    |
| ENSG00000006530 | 382.5529226 | 0.25385802   | 0.1043113   | 2.4336579    | 0.014947114 | 0.045377592 |

|                 |             |              |             |              |             |             |
|-----------------|-------------|--------------|-------------|--------------|-------------|-------------|
| ENSG00000006534 | 61.7497913  | 1.422196614  | 0.250169932 | 5.684922249  | 1.31E-08    | 1.59E-07    |
| ENSG00000006576 | 380.7560598 | -0.064152699 | 0.100146669 | -0.640587446 | 0.521790758 | 0.675986973 |
| ENSG00000006607 | 566.384809  | 0.201590815  | 0.092270961 | 2.184769861  | 0.028905725 | 0.078144448 |
| ENSG00000006625 | 125.6035039 | -0.037333469 | 0.160067095 | -0.233236375 | 0.815577861 | 0.891619754 |
| ENSG00000006634 | 317.4248212 | 0.192660541  | 0.112054287 | 1.719350027  | 0.085550656 | 0.186063904 |
| ENSG00000006638 | 79.56738501 | 0.52070808   | 0.238908991 | 2.179524833  | 0.029292702 | 0.078917258 |
| ENSG00000006652 | 70.0587087  | 1.061794049  | 0.212098602 | 5.006134119  | 5.55E-07    | 5.20E-06    |
| ENSG00000006695 | 169.9235794 | -0.093292342 | 0.145826744 | -0.639747826 | 0.522336557 | 0.676245311 |
| ENSG00000006704 | 221.0371716 | -0.391122049 | 0.140894465 | -2.775993    | 0.005503339 | 0.019398448 |
| ENSG00000006712 | 497.3251118 | 0.098360487  | 0.093347204 | 1.053705764  | 0.292017649 | 0.462535239 |
| ENSG00000006715 | 274.4737161 | -0.095848179 | 0.121666229 | -0.787796092 | 0.430815988 | 0.597477385 |
| ENSG00000006740 | 87.56532235 | -0.441762017 | 0.193034355 | -2.288514998 | 0.022107548 | 0.062572074 |
| ENSG00000006744 | 768.5847744 | 0.240583407  | 0.079834912 | 3.013511255  | 0.002582435 | 0.010169739 |
| ENSG00000006747 | 70.86239637 | -1.86159818  | 0.236287599 | -7.878526784 | 3.31E-15    | 8.09E-14    |
| ENSG00000006756 | 9.924340433 | 0.905145505  | 0.569273228 | 1.590001885  | 0.11183438  | 0.228799525 |
| ENSG00000006757 | 61.41195571 | 0.211843269  | 0.240618734 | 0.880410539  | 0.378636949 | 0.547981993 |
| ENSG00000006831 | 588.3872784 | 0.035445157  | 0.085808358 | 0.41307348   | 0.679552778 | 0.796741918 |
| ENSG00000006837 | 11.10948798 | -0.501402767 | 0.562132797 | -0.891964976 | 0.372411706 | 0.542944186 |
| ENSG00000007047 | 409.9143626 | -0.117193941 | 0.103492523 | -1.132390412 | 0.257470334 | 0.423283469 |
| ENSG00000007080 | 607.7962113 | 0.494317828  | 0.094163968 | 5.249543288  | 1.52E-07    | 1.57E-06    |
| ENSG00000007168 | 574.2496258 | -0.169885133 | 0.0869871   | -1.952992273 | 0.050820511 | 0.1233372   |
| ENSG00000007171 | 12.56730469 | -0.894138329 | 0.531963489 | -1.6808265   | 0.09279662  | 0.198072347 |
| ENSG00000007202 | 1637.706047 | -0.03364065  | 0.066673022 | -0.504561651 | 0.613866751 | 0.748716754 |
| ENSG00000007255 | 29.83514937 | -0.760515468 | 0.322070271 | -2.36133396  | 0.018209324 | 0.053534193 |
| ENSG00000007264 | 200.9114436 | -0.28202104  | 0.140615447 | -2.005619196 | 0.044896892 | 0.11205875  |
| ENSG00000007314 | 7.98281781  | -0.987196545 | 0.660446772 | -1.49474051  | 0.134982177 | 0.263822825 |
| ENSG00000007341 | 153.5616188 | -0.267098609 | 0.157596591 | -1.694824788 | 0.090108664 | 0.193511145 |
| ENSG00000007372 | 342.0672948 | -7.57531094  | 0.465183276 | -16.28457284 | 1.27E-59    | 1.65E-57    |
| ENSG00000007376 | 172.1665231 | -0.065680434 | 0.139483087 | -0.470884572 | 0.637723166 | 0.766193178 |
| ENSG00000007384 | 145.6710171 | 0.005079542  | 0.1490158   | 0.034087274  | 0.972807556 | 0.986075028 |
| ENSG00000007392 | 493.1557255 | -0.078532585 | 0.092362998 | -0.850260241 | 0.395180416 | 0.563217718 |
| ENSG00000007402 | 27.49103176 | -2.399684213 | 0.405690916 | -5.915055322 | 3.32E-09    | 4.32E-08    |
| ENSG00000007520 | 184.4155838 | 0.551622882  | 0.141022051 | 3.911607287  | 9.17E-05    | 0.000532403 |
| ENSG00000007541 | 60.56284626 | -0.224669662 | 0.237024878 | -0.947873757 | 0.343193726 | 0.515047251 |
| ENSG00000007545 | 108.3727561 | 0.286853111  | 0.181037956 | 1.584491553  | 0.113081902 | 0.230948166 |
| ENSG00000007866 | 150.8241128 | -0.152853592 | 0.151867016 | -1.006496319 | 0.314176882 | 0.485451838 |
| ENSG00000007923 | 1542.937083 | 0.348613754  | 0.072631548 | 4.799756646  | 1.59E-06    | 1.35E-05    |
| ENSG00000007944 | 90.46040906 | 0.212359292  | 0.193754581 | 1.096022045  | 0.273069127 | 0.44109959  |
| ENSG00000007968 | 261.5453501 | -0.049089715 | 0.120560077 | -0.40718052  | 0.683875408 | 0.800149899 |
| ENSG00000008018 | 888.8022528 | 0.471602238  | 0.081918746 | 5.756951398  | 8.56E-09    | 1.06E-07    |
| ENSG00000008056 | 11.33625345 | -0.029369182 | 0.525771816 | -0.055859179 | 0.955453991 | 0.976091797 |
| ENSG00000008083 | 435.4000377 | -0.654045066 | 0.096307325 | -6.791228651 | 1.11E-11    | 1.95E-10    |
| ENSG00000008128 | 44.44026085 | 0.23969115   | 0.259412332 | 0.923977472  | 0.355498045 | 0.527037577 |
| ENSG00000008130 | 299.2193881 | 0.186009592  | 0.114352622 | 1.626631638  | 0.103815356 | 0.215867235 |
| ENSG00000008256 | 269.1740653 | -0.499758558 | 0.118342531 | -4.22298352  | 2.41E-05    | 0.000159144 |
| ENSG00000008277 | 241.1494775 | 0.488692333  | 0.120005803 | 4.072239177  | 4.66E-05    | 0.00028903  |
| ENSG00000008282 | 248.6124156 | 0.750259322  | 0.120105957 | 6.246645397  | 4.19E-10    | 6.15E-09    |
| ENSG00000008283 | 126.0482941 | 0.202844173  | 0.163960551 | 1.237152299  | 0.216030547 | 0.372341032 |
| ENSG00000008294 | 1216.076097 | -0.300256254 | 0.06801484  | -4.414569748 | 1.01E-05    | 7.25E-05    |
| ENSG00000008300 | 548.7970077 | -0.578363218 | 0.103933402 | -5.564748232 | 2.63E-08    | 3.04E-07    |

|                 |             |              |             |              |             |             |
|-----------------|-------------|--------------|-------------|--------------|-------------|-------------|
| ENSG00000008311 | 86.07932538 | -1.973091817 | 0.224413007 | -8.792234662 | 1.47E-18    | 4.65E-17    |
| ENSG00000008324 | 49.77502805 | 0.368526749  | 0.249602839 | 1.476452555  | 0.139822443 | 0.27068438  |
| ENSG00000008382 | 141.6893908 | 0.219236635  | 0.160579905 | 1.365280631  | 0.172164864 | 0.315429744 |
| ENSG00000008394 | 455.4112282 | 0.642533772  | 0.094146061 | 6.824860886  | 8.80E-12    | 1.56E-10    |
| ENSG00000008405 | 136.7161582 | -0.678338812 | 0.161727214 | -4.194339316 | 2.74E-05    | 0.000178469 |
| ENSG00000008441 | 1356.638715 | 0.916815042  | 0.079571779 | 11.52186182  | 1.02E-30    | 5.75E-29    |
| ENSG00000008513 | 79.04283644 | 1.130798923  | 0.211765162 | 5.339872293  | 9.30E-08    | 9.85E-07    |
| ENSG00000008516 | 26.40744705 | 0.867449504  | 0.344204495 | 2.5201574    | 0.011730237 | 0.036944986 |
| ENSG00000008710 | 575.7625296 | -0.073254853 | 0.097332163 | -0.752627396 | 0.45167385  | 0.616629899 |
| ENSG00000008735 | 23.31362353 | -1.281886287 | 0.375395171 | -3.414764993 | 0.000638371 | 0.003009125 |
| ENSG00000008838 | 543.3908649 | -0.152417859 | 0.088669303 | -1.718947301 | 0.085623968 | 0.186128115 |
| ENSG00000008853 | 184.2307646 | 0.316884185  | 0.135610364 | 2.336725411  | 0.019453466 | 0.056460977 |
| ENSG00000008869 | 347.3623585 | 0.476730449  | 0.106374995 | 4.481602543  | 7.41E-06    | 5.46E-05    |
| ENSG00000008952 | 969.939035  | -0.03070669  | 0.076173479 | -0.403115233 | 0.686863455 | 0.802559553 |
| ENSG00000008988 | 4133.190393 | 0.1070902    | 0.066923125 | 1.600197233  | 0.109554836 | 0.225317244 |
| ENSG00000009307 | 3986.748535 | 0.014088185  | 0.054812156 | 0.257026648  | 0.797158201 | 0.878938874 |
| ENSG00000009335 | 955.7516357 | 0.644990895  | 0.074833527 | 8.619009713  | 6.75E-18    | 1.99E-16    |
| ENSG00000009413 | 652.2136487 | -0.162779726 | 0.087299742 | -1.864607173 | 0.062236487 | 0.14500513  |
| ENSG00000009694 | 22.88194529 | 1.935370557  | 0.419753391 | 4.610732394  | 4.01E-06    | 3.13E-05    |
| ENSG00000009724 | 26.95927912 | 0.02459697   | 0.342946603 | 0.07172245   | 0.94282279  | 0.968520046 |
| ENSG00000009780 | 64.26038004 | 0.006581761  | 0.220740965 | 0.029816672  | 0.976213262 | 0.987958767 |
| ENSG00000009830 | 170.7802644 | -0.001943325 | 0.15206882  | -0.012779248 | 0.989803912 | 0.994759318 |
| ENSG00000009844 | 225.6909385 | -0.142435941 | 0.129642556 | -1.098681981 | 0.271906805 | 0.439626483 |
| ENSG00000009950 | 92.9274492  | 0.280776672  | 0.182634747 | 1.537367212  | 0.124203411 | 0.248283096 |
| ENSG00000009954 | 2564.001896 | 0.004166376  | 0.059075674 | 0.070526079  | 0.943774944 | 0.968739981 |
| ENSG00000010017 | 374.9782866 | 0.159899383  | 0.101538621 | 1.574764176  | 0.115310888 | 0.234240354 |
| ENSG00000010072 | 117.5147244 | 0.106024484  | 0.170072665 | 0.623406962  | 0.533017124 | 0.684458501 |
| ENSG00000010165 | 294.9477642 | 0.096637417  | 0.11116781  | 0.86929316   | 0.384686803 | 0.553785012 |
| ENSG00000010219 | 52.23770439 | -0.051986437 | 0.240933271 | -0.215771099 | 0.829166177 | 0.900163426 |
| ENSG00000010244 | 1065.83522  | 0.081172425  | 0.079245168 | 1.024320187  | 0.305684066 | 0.47668118  |
| ENSG00000010256 | 1950.918642 | 0.127470944  | 0.066496228 | 1.916965028  | 0.055242375 | 0.131971027 |
| ENSG00000010270 | 137.7412861 | -0.134842306 | 0.158196926 | -0.852369949 | 0.394008794 | 0.562063728 |
| ENSG00000010278 | 126.2001025 | -0.897378205 | 0.163146177 | -5.500455012 | 3.79E-08    | 4.29E-07    |
| ENSG00000010292 | 1511.55355  | -0.084155534 | 0.06874775  | -1.224120552 | 0.220906754 | 0.378654933 |
| ENSG00000010295 | 139.0709562 | -0.138295901 | 0.158654992 | -0.871676958 | 0.383384634 | 0.552575821 |
| ENSG00000010310 | 42.78747789 | -1.924305066 | 0.32006476  | -6.012236598 | 1.83E-09    | 2.47E-08    |
| ENSG00000010318 | 60.3827314  | -0.233989989 | 0.223274573 | -1.047992105 | 0.294642244 | 0.464881456 |
| ENSG00000010319 | 46.69377142 | 0.688597701  | 0.260281485 | 2.645588488  | 0.008154896 | 0.02718363  |
| ENSG00000010322 | 878.7853733 | 0.159621181  | 0.078519117 | 2.032895776  | 0.042063054 | 0.106557208 |
| ENSG00000010327 | 144.4753506 | 0.530384638  | 0.157172391 | 3.37454075   | 0.00073939  | 0.003428923 |
| ENSG00000010361 | 134.2947107 | -0.172712956 | 0.166607118 | -1.036648124 | 0.299899877 | 0.470406446 |
| ENSG00000010404 | 111.6665453 | 0.082806969  | 0.181296135 | 0.456749777  | 0.647850908 | 0.773379936 |
| ENSG00000010539 | 77.73873605 | 0.55184797   | 0.208603485 | 2.645439844  | 0.008158479 | 0.027189124 |
| ENSG00000010626 | 34.68778596 | -0.371130791 | 0.295970761 | -1.253944107 | 0.209862322 | 0.364933899 |
| ENSG00000010704 | 86.81085813 | 1.264746423  | 0.19726155  | 6.411520268  | 1.44E-10    | 2.23E-09    |
| ENSG00000010803 | 349.0164516 | -0.206323591 | 0.110697761 | -1.863846119 | 0.062343317 | 0.145205865 |
| ENSG00000010810 | 49.66794999 | -0.056268172 | 0.257677912 | -0.2183663   | 0.827143721 | 0.898668717 |
| ENSG00000010818 | 477.8005895 | -0.461326414 | 0.094224559 | -4.896031569 | 9.78E-07    | 8.66E-06    |
| ENSG00000011007 | 1213.752981 | 0.189117527  | 0.067672316 | 2.794606969  | 0.005196285 | 0.018494733 |
| ENSG00000011009 | 123.8797274 | 0.177298033  | 0.161125545 | 1.100371969  | 0.271170087 | 0.438811526 |

|                 |             |              |             |              |             |             |
|-----------------|-------------|--------------|-------------|--------------|-------------|-------------|
| ENSG00000011021 | 472.1454831 | 0.404704156  | 0.093316496 | 4.336898343  | 1.45E-05    | 0.000100143 |
| ENSG00000011028 | 1412.661988 | -0.135468717 | 0.075884628 | -1.785193129 | 0.074229996 | 0.166142249 |
| ENSG00000011105 | 197.9133626 | 0.37997059   | 0.133095328 | 2.854875495  | 0.00430537  | 0.015765781 |
| ENSG00000011114 | 339.4857298 | -0.182831339 | 0.108284017 | -1.68844253  | 0.091326312 | 0.19567735  |
| ENSG00000011132 | 82.16692019 | 0.802678534  | 0.196591089 | 4.082985341  | 4.45E-05    | 0.000276836 |
| ENSG00000011143 | 112.3206929 | -0.121743632 | 0.168424735 | -0.722837011 | 0.469780026 | 0.631664595 |
| ENSG00000011198 | 187.7010564 | 0.175356171  | 0.135756988 | 1.291691673  | 0.196463942 | 0.347660494 |
| ENSG00000011243 | 897.653957  | 0.063000679  | 0.077334496 | 0.814651708  | 0.415271703 | 0.583209876 |
| ENSG00000011258 | 275.6236016 | -0.238828258 | 0.114704283 | -2.082121531 | 0.03733137  | 0.096342781 |
| ENSG00000011260 | 275.1105536 | 0.286665108  | 0.112206554 | 2.554798251  | 0.010624936 | 0.033927819 |
| ENSG00000011275 | 691.4949026 | 0.150128983  | 0.082873832 | 1.811536646  | 0.070057822 | 0.159111111 |
| ENSG00000011295 | 392.0450054 | -0.095057899 | 0.098942134 | -0.96074235  | 0.336681732 | 0.508534225 |
| ENSG00000011304 | 3677.345438 | 0.043784789  | 0.058765968 | 0.745070504  | 0.456229099 | 0.61991199  |
| ENSG00000011332 | 27.32548334 | -1.025319048 | 0.360248843 | -2.846141131 | 0.004425258 | 0.016145869 |
| ENSG00000011376 | 924.3847832 | -0.22320348  | 0.074292997 | -3.004367707 | 0.002661335 | 0.010427829 |
| ENSG00000011405 | 1000.65128  | -0.651403634 | 0.078439016 | -8.304587019 | 1.00E-16    | 2.72E-15    |
| ENSG00000011422 | 88.64048269 | -1.005145781 | 0.196186977 | -5.123407255 | 3.00E-07    | 2.92E-06    |
| ENSG00000011426 | 1014.137147 | 0.136758299  | 0.074599037 | 1.833244821  | 0.066766171 | 0.153270862 |
| ENSG00000011451 | 598.3158388 | 0.104453015  | 0.096724012 | 1.079907801  | 0.280183239 | 0.449028404 |
| ENSG00000011454 | 488.7605788 | -0.376965327 | 0.099756205 | -3.778865939 | 0.000157544 | 0.000866154 |
| ENSG00000011465 | 1155.83733  | 3.288926307  | 0.089483012 | 36.75475625  | 9.76E-296   | 1.52E-292   |
| ENSG00000011478 | 113.9699336 | -0.077977615 | 0.192914378 | -0.404208418 | 0.686059464 | 0.801843308 |
| ENSG00000011485 | 597.7893333 | 0.139089445  | 0.086524562 | 1.607514006  | 0.107941659 | 0.222651721 |
| ENSG00000011523 | 143.3015963 | -0.630103274 | 0.159094959 | -3.960548331 | 7.48E-05    | 0.000442835 |
| ENSG00000011566 | 274.6537452 | -0.248344257 | 0.116117866 | -2.138725632 | 0.032457895 | 0.085847497 |
| ENSG00000011638 | 13.25280898 | -0.027045336 | 0.490394308 | -0.055150182 | 0.956018817 | 0.97639816  |
| ENSG00000012048 | 709.947829  | -0.335212085 | 0.087511916 | -3.830473606 | 0.000127897 | 0.000719202 |
| ENSG00000012061 | 977.0357453 | 0.221450499  | 0.076629726 | 2.889877213  | 0.003853923 | 0.014325499 |
| ENSG00000012171 | 45.12962224 | -0.943618465 | 0.27316178  | -3.454430798 | 0.000551456 | 0.002643788 |
| ENSG00000012174 | 158.2962331 | -0.134079034 | 0.143648482 | -0.933382876 | 0.350622319 | 0.522500564 |
| ENSG00000012211 | 307.2782876 | 0.000359944  | 0.109939701 | 0.003274012  | 0.997387721 | 0.998813347 |
| ENSG00000012232 | 480.3286964 | -0.338860743 | 0.094031135 | -3.603707895 | 0.00031371  | 0.00159952  |
| ENSG00000012660 | 2681.951502 | -0.082468531 | 0.064788487 | -1.272888665 | 0.203057552 | 0.356009665 |
| ENSG00000012822 | 138.7326321 | -0.160559696 | 0.160402809 | -1.000978082 | 0.316837405 | 0.488488094 |
| ENSG00000012963 | 201.1632461 | -0.123111939 | 0.136766739 | -0.900159934 | 0.368035145 | 0.539393505 |
| ENSG00000012983 | 435.5287986 | 0.113595806  | 0.09578027  | 1.186004237  | 0.235620626 | 0.396663823 |
| ENSG00000013016 | 561.0683228 | 0.051073889  | 0.087783613 | 0.581815762  | 0.560690786 | 0.707146494 |
| ENSG00000013275 | 921.4946714 | 0.540736003  | 0.075234672 | 7.187324511  | 6.61E-13    | 1.34E-11    |
| ENSG00000013288 | 342.8922584 | 0.210040117  | 0.106592514 | 1.970495957  | 0.048781558 | 0.11967072  |
| ENSG00000013297 | 9.024080541 | -2.254972147 | 0.67606484  | -3.335437686 | 0.000851652 | 0.00388793  |
| ENSG00000013306 | 878.2288829 | 0.234078312  | 0.084150576 | 2.781660248  | 0.005408162 | 0.019098375 |
| ENSG00000013364 | 106.1470848 | -0.961250153 | 0.179570815 | -5.353042208 | 8.65E-08    | 9.21E-07    |
| ENSG00000013374 | 368.9596975 | 0.826596343  | 0.104495869 | 7.910325549  | 2.57E-15    | 6.36E-14    |
| ENSG00000013375 | 266.281609  | 0.007430522  | 0.114570003 | 0.064855739  | 0.948288862 | 0.971358017 |
| ENSG00000013392 | 21.47729069 | 0.011627091  | 0.383643777 | 0.030306997  | 0.975822217 | 0.98780011  |
| ENSG00000013441 | 235.6831269 | 0.161127904  | 0.131570554 | 1.224650185  | 0.220707051 | 0.378451165 |
| ENSG00000013503 | 190.2493943 | 0.168279923  | 0.135944985 | 1.237853111  | 0.215770531 | 0.372121381 |
| ENSG00000013523 | 251.335904  | -0.127925312 | 0.120654489 | -1.060261514 | 0.289025643 | 0.459217645 |
| ENSG00000013561 | 90.75713258 | -0.048794221 | 0.1930088   | -0.252808271 | 0.800416376 | 0.88094091  |
| ENSG00000013563 | 100.5125969 | -0.641169618 | 0.180342757 | -3.555283448 | 0.000377572 | 0.001887898 |

|                 |             |              |             |              |             |             |
|-----------------|-------------|--------------|-------------|--------------|-------------|-------------|
| ENSG00000013573 | 253.4002976 | -0.111035379 | 0.123907579 | -0.896114509 | 0.370191609 | 0.541449555 |
| ENSG00000013583 | 172.5198353 | -0.042774718 | 0.137181043 | -0.311812166 | 0.755183278 | 0.852042366 |
| ENSG00000013588 | 8.993080515 | -0.412436071 | 0.574995844 | -0.717285309 | 0.47319807  | 0.634438608 |
| ENSG00000013810 | 810.0043188 | 0.120140028  | 0.077406888 | 1.552058632  | 0.120648195 | 0.242834962 |
| ENSG00000014123 | 207.0362771 | 0.220594502  | 0.133553864 | 1.651726843  | 0.098590248 | 0.20744416  |
| ENSG00000014138 | 88.12249405 | -0.238137034 | 0.192833754 | -1.234934388 | 0.216854924 | 0.373487141 |
| ENSG00000014164 | 215.7912229 | 0.156289274  | 0.139018407 | 1.124234389  | 0.260913604 | 0.427162401 |
| ENSG00000014216 | 301.1180238 | -0.549680765 | 0.112363466 | -4.89198832  | 9.98E-07    | 8.84E-06    |
| ENSG00000014641 | 660.5611598 | 0.089867677  | 0.093575583 | 0.960375286  | 0.336866372 | 0.508758405 |
| ENSG00000014824 | 433.9445708 | -0.238511837 | 0.108415208 | -2.19998506  | 0.027807955 | 0.075774655 |
| ENSG00000014914 | 312.5838754 | -0.269912039 | 0.112423563 | -2.400849352 | 0.016357069 | 0.048990991 |
| ENSG00000014919 | 101.2804871 | -0.529133221 | 0.186019381 | -2.844505873 | 0.004448037 | 0.016216343 |
| ENSG00000015133 | 522.1625761 | 0.201222188  | 0.096206905 | 2.091556608  | 0.036478198 | 0.094645224 |
| ENSG00000015153 | 151.1019568 | 0.223855549  | 0.147724799 | 1.515355246  | 0.129682465 | 0.25624164  |
| ENSG00000015171 | 619.291925  | 0.041476388  | 0.083005329 | 0.499683437  | 0.617297997 | 0.75140251  |
| ENSG00000015413 | 11.02800538 | -0.045393264 | 0.539960585 | -0.084067737 | 0.933002576 | 0.963270344 |
| ENSG00000015475 | 259.3846923 | 0.460594448  | 0.123469137 | 3.730441948  | 0.000191144 | 0.001026241 |
| ENSG00000015479 | 266.4806426 | -0.115329738 | 0.116185566 | -0.992633954 | 0.320888372 | 0.492590252 |
| ENSG00000015532 | 375.7172947 | -0.066012776 | 0.117510786 | -0.56175929  | 0.574280033 | 0.718527801 |
| ENSG00000015676 | 347.1249723 | 0.083781733  | 0.107285958 | 0.780919834  | 0.434849646 | 0.601106126 |
| ENSG00000016082 | 670.1502057 | -0.116215271 | 0.085260091 | -1.363067633 | 0.172861196 | 0.316581646 |
| ENSG00000016391 | 64.64398317 | -1.847516098 | 0.249990554 | -7.390343631 | 1.46E-13    | 3.18E-12    |
| ENSG00000016402 | 32.49106632 | 1.800495262  | 0.333198164 | 5.40367702   | 6.53E-08    | 7.09E-07    |
| ENSG00000016864 | 345.1359722 | 0.109774616  | 0.117717596 | 0.93252513   | 0.351065206 | 0.522671567 |
| ENSG00000017260 | 364.642131  | 0.219228168  | 0.102081723 | 2.147575109  | 0.031747525 | 0.084254199 |
| ENSG00000017483 | 10.95075555 | 6.09397569   | 1.25367031  | 4.86090772   | 1.17E-06    | 1.02E-05    |
| ENSG00000017797 | 441.4801101 | 0.136622562  | 0.095548082 | 1.429882826  | 0.152750652 | 0.289055498 |
| ENSG00000018189 | 327.0490917 | -0.228228554 | 0.109027103 | -2.093319444 | 0.036320648 | 0.094323561 |
| ENSG00000018408 | 686.9165609 | -0.191586886 | 0.095802687 | -1.999807011 | 0.045521107 | 0.113293164 |
| ENSG00000018510 | 426.0808716 | -0.090056506 | 0.097754435 | -0.921252377 | 0.356918678 | 0.528196025 |
| ENSG00000018610 | 122.5387934 | 0.385615363  | 0.160756272 | 2.398757802  | 0.016450792 | 0.049229713 |
| ENSG00000018699 | 354.1750845 | 0.138125159  | 0.101535741 | 1.360359977  | 0.173716037 | 0.317691599 |
| ENSG00000019144 | 526.1159707 | 0.282672785  | 0.095773772 | 2.951463425  | 0.00316272  | 0.012085617 |
| ENSG00000019485 | 86.27703858 | -0.616179181 | 0.206002447 | -2.991125535 | 0.002779512 | 0.010812463 |
| ENSG00000019549 | 142.4984735 | -1.586114186 | 0.303437369 | -5.227155084 | 1.72E-07    | 1.75E-06    |
| ENSG00000019582 | 305.2092625 | 0.355606963  | 0.113633466 | 3.129421065  | 0.001751511 | 0.00730724  |
| ENSG00000019991 | 7470.910417 | -0.547315488 | 0.056796326 | -9.636459357 | 5.61E-22    | 2.11E-20    |
| ENSG00000019995 | 257.7516755 | -0.406204064 | 0.124974079 | -3.250306536 | 0.001152807 | 0.005084294 |
| ENSG00000020129 | 381.5566479 | 0.18505888   | 0.107454322 | 1.722209743  | 0.085031531 | 0.185155466 |
| ENSG00000020181 | 244.8355139 | -0.092742369 | 0.122786604 | -0.755313413 | 0.450060952 | 0.615051564 |
| ENSG00000020256 | 815.8667596 | -0.634447276 | 0.084655363 | -7.494472371 | 6.66E-14    | 1.47E-12    |
| ENSG00000020426 | 207.7276098 | -0.8651479   | 0.133664913 | -6.472513096 | 9.64E-11    | 1.52E-09    |
| ENSG00000020577 | 250.8038837 | -0.207613202 | 0.119610397 | -1.735745438 | 0.082608856 | 0.181055399 |
| ENSG00000020633 | 8.971664446 | 0.951310362  | 0.591789988 | 1.607513445  | 0.107941782 | 0.222651721 |
| ENSG00000020922 | 150.6004521 | -0.317987232 | 0.150921647 | -2.106968998 | 0.035120267 | 0.091697842 |
| ENSG00000021300 | 58.35025002 | 0.032615728  | 0.230701218 | 0.141376487  | 0.887572528 | 0.938340581 |
| ENSG00000021574 | 187.079658  | -0.275053499 | 0.166673251 | -1.650255801 | 0.098890628 | 0.207889353 |
| ENSG00000021762 | 121.6493891 | -0.203403416 | 0.1687067   | -1.205662941 | 0.22794748  | 0.386682938 |
| ENSG00000021776 | 1097.703748 | -0.172501675 | 0.076137076 | -2.265672442 | 0.023471446 | 0.065769679 |
| ENSG00000021826 | 174.8846605 | -1.669576543 | 0.16229502  | -10.28729373 | 8.04E-25    | 3.54E-23    |

|                 |             |              |             |              |             |             |
|-----------------|-------------|--------------|-------------|--------------|-------------|-------------|
| ENSG00000022267 | 183.8885133 | 0.850253205  | 0.137123559 | 6.200635469  | 5.62E-10    | 8.11E-09    |
| ENSG00000022277 | 171.3414726 | 0.166538711  | 0.140164609 | 1.188165203  | 0.23476833  | 0.395703231 |
| ENSG00000022556 | 196.8520182 | 0.262652995  | 0.134442909 | 1.953639627  | 0.050743851 | 0.123236319 |
| ENSG00000022567 | 166.2824263 | 0.182364935  | 0.146523415 | 1.244612922  | 0.213274068 | 0.368721334 |
| ENSG00000022840 | 702.1155493 | 0.008562554  | 0.082379815 | 0.103939953  | 0.917217001 | 0.955230368 |
| ENSG00000022976 | 177.907935  | 0.088721224  | 0.145756215 | 0.608695992  | 0.542725964 | 0.691942716 |
| ENSG00000023041 | 131.3248863 | 0.008622412  | 0.165666052 | 0.052046945  | 0.958491288 | 0.977701483 |
| ENSG00000023171 | 25.53552776 | -0.943279654 | 0.370805081 | -2.543869282 | 0.01096321  | 0.034873237 |
| ENSG00000023191 | 514.6637684 | 0.686095293  | 0.10519115  | 6.522367063  | 6.92E-11    | 1.12E-09    |
| ENSG00000023228 | 902.1339607 | -0.138824742 | 0.075818507 | -1.831013919 | 0.067098466 | 0.153907927 |
| ENSG00000023287 | 412.8710449 | 0.031738683  | 0.103245314 | 0.307410394  | 0.758531017 | 0.854526041 |
| ENSG00000023318 | 349.1623867 | 0.075806972  | 0.108073394 | 0.701439729  | 0.483028636 | 0.643570018 |
| ENSG00000023330 | 568.9388611 | 0.227780879  | 0.086499818 | 2.633310506  | 0.0084557   | 0.028066452 |
| ENSG00000023445 | 7.416287071 | -0.495089163 | 0.706421137 | -0.700841378 | 0.483402012 | 0.644001144 |
| ENSG00000023516 | 745.2362401 | 0.256613383  | 0.078337193 | 3.275754104  | 0.001053803 | 0.004709757 |
| ENSG00000023572 | 201.1557822 | 0.214551122  | 0.139656146 | 1.536281271  | 0.124469411 | 0.248708651 |
| ENSG00000023608 | 77.32393252 | -0.744762815 | 0.206865059 | -3.600234942 | 0.00031793  | 0.001617581 |
| ENSG00000023697 | 75.95467602 | -0.510385501 | 0.206185127 | -2.475374955 | 0.013309636 | 0.041162584 |
| ENSG00000023734 | 1126.303883 | 0.164459592  | 0.074797709 | 2.198724975  | 0.027897484 | 0.075951239 |
| ENSG00000023839 | 18.27116365 | 0.190824757  | 0.404729178 | 0.471487521  | 0.637292629 | 0.765956258 |
| ENSG00000023892 | 71.93424178 | -0.116195601 | 0.21261307  | -0.546512029 | 0.584714021 | 0.726667865 |
| ENSG00000023902 | 273.8384294 | 0.631119796  | 0.114612348 | 5.506560232  | 3.66E-08    | 4.15E-07    |
| ENSG00000023909 | 134.4286566 | -0.019204462 | 0.156736107 | -0.122527364 | 0.902481376 | 0.947258155 |
| ENSG00000024048 | 456.6038773 | -0.093930977 | 0.09698782  | -0.968482198 | 0.332803606 | 0.505081442 |
| ENSG00000024422 | 121.0890944 | 5.404936271  | 0.359639454 | 15.02876341  | 4.76E-51    | 5.26E-49    |
| ENSG00000024526 | 508.4987592 | -0.138533407 | 0.09061005  | -1.528896705 | 0.126290053 | 0.251238688 |
| ENSG00000024862 | 16.88729005 | 0.090080435  | 0.430360843 | 0.209313734  | 0.834203331 | 0.902777673 |
| ENSG00000025039 | 171.1578567 | 0.035561298  | 0.140033742 | 0.253948065  | 0.799535681 | 0.880801115 |
| ENSG00000025156 | 168.1593976 | -1.189796553 | 0.149779076 | -7.943676673 | 1.96E-15    | 4.88E-14    |
| ENSG00000025293 | 282.7214482 | -0.225013873 | 0.122091981 | -1.842986511 | 0.06533098  | 0.150717261 |
| ENSG00000025434 | 55.26393178 | -0.993120386 | 0.253224463 | -3.921897492 | 8.79E-05    | 0.000512709 |
| ENSG00000025770 | 186.885862  | 0.236456622  | 0.135881088 | 1.740173153  | 0.081828618 | 0.179784224 |
| ENSG00000025772 | 428.9482652 | 0.47239599   | 0.097111251 | 4.86448261   | 1.15E-06    | 1.00E-05    |
| ENSG00000025796 | 925.5993192 | -0.08473143  | 0.07977483  | -1.062132385 | 0.28817559  | 0.458177986 |
| ENSG00000025800 | 630.8607211 | -0.774457753 | 0.086810487 | -8.921246525 | 4.61E-19    | 1.49E-17    |
| ENSG00000026025 | 8157.032736 | 0.449217633  | 0.059860255 | 7.50443898   | 6.17E-14    | 1.37E-12    |
| ENSG00000026103 | 51.40981426 | 0.251045404  | 0.260727865 | 0.962863726  | 0.335615915 | 0.507360822 |
| ENSG00000026297 | 388.1210023 | 0.268298948  | 0.123162474 | 2.178414735  | 0.029375174 | 0.079078779 |
| ENSG00000026559 | 163.4903361 | -0.125189822 | 0.144321867 | -0.86743488  | 0.385703777 | 0.554545339 |
| ENSG00000026652 | 161.8305421 | 0.21709114   | 0.143877957 | 1.508856143  | 0.13133555  | 0.258711326 |
| ENSG00000026950 | 50.81114745 | 0.805873616  | 0.264270273 | 3.049429689  | 0.002292763 | 0.009183473 |
| ENSG00000027001 | 85.3714524  | -0.282503374 | 0.194338262 | -1.453668313 | 0.146038287 | 0.279482264 |
| ENSG00000027075 | 199.34413   | -5.64414014  | 0.327695932 | -17.22371134 | 1.76E-66    | 2.72E-64    |
| ENSG00000027697 | 54.98904433 | 0.159531167  | 0.2376058   | 0.671411081  | 0.501958687 | 0.660269097 |
| ENSG00000027847 | 110.8029497 | 0.277066059  | 0.173388592 | 1.597948608  | 0.110054415 | 0.226179132 |
| ENSG00000027869 | 107.0955911 | 0.190637558  | 0.172879462 | 1.102719525  | 0.270148985 | 0.437539812 |
| ENSG00000028116 | 195.8153102 | -0.170025791 | 0.137217284 | -1.239098931 | 0.215308863 | 0.371553267 |
| ENSG00000028203 | 234.9015979 | 0.001506132  | 0.122238171 | 0.012321291  | 0.99016928  | 0.994914727 |
| ENSG00000028310 | 362.6272365 | 0.063000481  | 0.106395332 | 0.592135767  | 0.553759678 | 0.700924384 |
| ENSG00000028528 | 269.8321472 | -0.848375888 | 0.120818113 | -7.021926322 | 2.19E-12    | 4.21E-11    |

|                 |             |              |             |              |             |             |
|-----------------|-------------|--------------|-------------|--------------|-------------|-------------|
| ENSG00000028839 | 32.8330013  | -0.027981311 | 0.311607295 | -0.089796715 | 0.928448759 | 0.960943097 |
| ENSG00000029153 | 152.7173468 | 1.029383761  | 0.148615695 | 6.926480827  | 4.31E-12    | 8.02E-11    |
| ENSG00000029363 | 1628.884082 | -0.001837044 | 0.065503818 | -0.028044837 | 0.977626391 | 0.988629033 |
| ENSG00000029364 | 330.1395229 | 0.013178963  | 0.108932493 | 0.120982849  | 0.90370462  | 0.948177575 |
| ENSG00000029534 | 50.30681294 | -2.830265638 | 0.322904659 | -8.765019522 | 1.87E-18    | 5.82E-17    |
| ENSG00000029639 | 129.2642655 | 0.142740589  | 0.163248462 | 0.874376315  | 0.381913352 | 0.551414026 |
| ENSG00000029725 | 1216.37935  | 0.252292033  | 0.074760959 | 3.374649486  | 0.000739098 | 0.0034287   |
| ENSG00000029993 | 477.0002648 | -0.049438797 | 0.093984834 | -0.526029518 | 0.598867698 | 0.737617016 |
| ENSG00000030066 | 537.7477702 | -0.108230767 | 0.092499674 | -1.170066466 | 0.241974222 | 0.404692451 |
| ENSG00000030110 | 61.25755684 | 0.081731005  | 0.237847856 | 0.343627253  | 0.731126627 | 0.834021092 |
| ENSG00000030419 | 14.31647066 | -4.246223633 | 0.810210418 | -5.240889944 | 1.60E-07    | 1.63E-06    |
| ENSG00000030582 | 664.5048739 | 0.032063469  | 0.097288384 | 0.329571404  | 0.741723833 | 0.842008184 |
| ENSG00000031003 | 158.6318507 | -0.442035332 | 0.145783695 | -3.032131495 | 0.002428334 | 0.009635821 |
| ENSG00000031081 | 52.39027822 | -0.113307074 | 0.242260067 | -0.467708425 | 0.639993116 | 0.767565619 |
| ENSG00000031691 | 36.17106353 | 0.04319255   | 0.289765092 | 0.149060569  | 0.881505839 | 0.934740887 |
| ENSG00000031698 | 848.8954802 | -0.121734056 | 0.077286456 | -1.575102069 | 0.115232887 | 0.234115759 |
| ENSG00000031823 | 547.0452694 | 0.175647474  | 0.087664443 | 2.003634171  | 0.045109263 | 0.112428994 |
| ENSG00000032219 | 554.9177941 | 0.126080514  | 0.087667318 | 1.43817008   | 0.150385802 | 0.285700482 |
| ENSG00000032389 | 190.2692568 | 0.025039194  | 0.157122583 | 0.159360884  | 0.873384555 | 0.929849389 |
| ENSG00000032444 | 314.2791828 | -0.267081501 | 0.118136852 | -2.260780587 | 0.023772847 | 0.066468389 |
| ENSG00000032742 | 186.423583  | -0.223239894 | 0.140610147 | -1.587651379 | 0.112365193 | 0.229751655 |
| ENSG00000033011 | 85.55334109 | -0.18060556  | 0.190254884 | -0.949282121 | 0.342477144 | 0.514411511 |
| ENSG00000033030 | 344.0341958 | -0.145672019 | 0.107271579 | -1.357974033 | 0.174471924 | 0.318907337 |
| ENSG00000033050 | 276.8293263 | 0.97861319   | 0.121876873 | 8.029523279  | 9.79E-16    | 2.51E-14    |
| ENSG00000033100 | 346.2357965 | 0.657030233  | 0.106703282 | 6.157544722  | 7.39E-10    | 1.05E-08    |
| ENSG00000033170 | 108.4832188 | -0.445835587 | 0.17498399  | -2.547865017 | 0.01083844  | 0.034523258 |
| ENSG00000033178 | 537.2629334 | 0.273520613  | 0.0999014   | 2.737905717  | 0.00618318  | 0.021387621 |
| ENSG00000033327 | 129.3625106 | -0.175127032 | 0.165357227 | -1.059083027 | 0.289561969 | 0.459809743 |
| ENSG00000033627 | 464.6741444 | 0.283652607  | 0.095483956 | 2.970683429  | 0.002971379 | 0.011441601 |
| ENSG00000033800 | 401.6009717 | -0.098013465 | 0.105715669 | -0.92714227  | 0.353852672 | 0.525319011 |
| ENSG00000033867 | 798.4688805 | -0.163722716 | 0.080636841 | -2.030371149 | 0.042318827 | 0.107089275 |
| ENSG00000034053 | 363.7136211 | 0.169191172  | 0.105217059 | 1.608020347  | 0.107830722 | 0.222520664 |
| ENSG00000034152 | 251.7317957 | 0.729908351  | 0.119604959 | 6.102659587  | 1.04E-09    | 1.45E-08    |
| ENSG00000034510 | 435.1271166 | -0.259784813 | 0.095120768 | -2.731105088 | 0.006312234 | 0.021764348 |
| ENSG00000034533 | 36.33474166 | -0.057332702 | 0.288990368 | -0.198389662 | 0.842740205 | 0.908748678 |
| ENSG00000034677 | 187.6637028 | 0.269894737  | 0.136427159 | 1.97830652   | 0.047894138 | 0.117946872 |
| ENSG00000034693 | 70.297797   | 0.411266537  | 0.214484427 | 1.917465725  | 0.055178791 | 0.131841551 |
| ENSG00000034713 | 237.1423514 | -0.28826497  | 0.143926927 | -2.002856424 | 0.045192701 | 0.112596999 |
| ENSG00000034971 | 18.82163026 | -0.207449396 | 0.412094258 | -0.503402782 | 0.614681116 | 0.749255956 |
| ENSG00000035115 | 126.4588686 | -0.111935123 | 0.179288663 | -0.624329061 | 0.532411502 | 0.683993449 |
| ENSG00000035141 | 479.3187957 | -0.025531565 | 0.091912955 | -0.27777983  | 0.781181375 | 0.868878442 |
| ENSG00000035403 | 2317.239163 | -0.814842563 | 0.061073253 | -13.34205265 | 1.32E-40    | 1.05E-38    |
| ENSG00000035499 | 147.4575977 | -0.124479087 | 0.155055252 | -0.802804712 | 0.422087618 | 0.589721979 |
| ENSG00000035681 | 518.6240534 | 0.242531789  | 0.090539234 | 2.678747955  | 0.0073898   | 0.024973678 |
| ENSG00000035687 | 330.7796203 | 0.05341643   | 0.108536088 | 0.492153633  | 0.62261074  | 0.75505595  |
| ENSG00000035862 | 1152.911162 | 0.762887655  | 0.078583081 | 9.708039467  | 2.79E-22    | 1.06E-20    |
| ENSG00000035928 | 664.3017961 | -0.079863524 | 0.084908141 | -0.940587367 | 0.346916358 | 0.518915353 |
| ENSG00000036054 | 183.2078762 | -0.268326338 | 0.138935249 | -1.931304983 | 0.053445348 | 0.128376675 |
| ENSG00000036257 | 657.2712949 | 0.01991011   | 0.08251214  | 0.241299157  | 0.809323264 | 0.887406439 |
| ENSG00000036530 | 18.31691143 | -0.86688607  | 0.417619305 | -2.075780646 | 0.037914243 | 0.097513442 |



|                 |             |              |             |              |             |             |
|-----------------|-------------|--------------|-------------|--------------|-------------|-------------|
| ENSG00000036549 | 377.1336591 | -0.074130735 | 0.100116443 | -0.740445152 | 0.45902993  | 0.62242959  |
| ENSG00000036672 | 29.39660885 | -1.00926583  | 0.338834384 | -2.978640534 | 0.002895302 | 0.01119161  |
| ENSG00000037042 | 79.34600914 | -0.098064807 | 0.205809637 | -0.476483066 | 0.633730269 | 0.76313837  |
| ENSG00000037241 | 77.90705972 | 0.587187086  | 0.201369947 | 2.915961863  | 0.003545938 | 0.013358132 |
| ENSG00000037280 | 125.0817133 | -0.099789045 | 0.159448155 | -0.625840073 | 0.531419845 | 0.683156819 |
| ENSG00000037474 | 885.6521446 | 0.071111427  | 0.074137837 | 0.959178607  | 0.337468776 | 0.509394358 |
| ENSG00000037637 | 196.6927664 | -0.156089374 | 0.129766676 | -1.202846366 | 0.229035778 | 0.387861666 |
| ENSG00000037749 | 118.2410829 | -0.337901411 | 0.168257102 | -2.008244566 | 0.044617309 | 0.111519456 |
| ENSG00000037757 | 271.6438687 | 0.420302421  | 0.130137976 | 3.229667739  | 0.001239342 | 0.005416624 |
| ENSG00000037897 | 82.41368696 | 0.142389375  | 0.199298002 | 0.714454606  | 0.474946116 | 0.635988668 |
| ENSG00000037965 | 143.4011124 | -0.15881021  | 0.151834258 | -1.045944524 | 0.295586646 | 0.46600512  |
| ENSG00000038002 | 36.70397947 | 0.476107982  | 0.293549946 | 1.621897698  | 0.104825255 | 0.217597215 |
| ENSG00000038210 | 268.2539158 | -0.973268434 | 0.121868507 | -7.986217779 | 1.39E-15    | 3.53E-14    |
| ENSG00000038219 | 1001.006198 | -0.045541481 | 0.076717665 | -0.593624446 | 0.552763327 | 0.700024022 |
| ENSG00000038274 | 198.806654  | 0.014321571  | 0.130371207 | 0.109852255  | 0.912526548 | 0.953030514 |
| ENSG00000038358 | 364.0494972 | -0.595609567 | 0.108776667 | -5.475526904 | 4.36E-08    | 4.87E-07    |
| ENSG00000038382 | 812.9256999 | -0.717003305 | 0.084115759 | -8.524006812 | 1.54E-17    | 4.44E-16    |
| ENSG00000038427 | 153.141501  | -2.254090994 | 0.176549731 | -12.76745639 | 2.49E-37    | 1.77E-35    |
| ENSG00000038532 | 219.9269534 | -0.974586483 | 0.129589462 | -7.520568964 | 5.45E-14    | 1.22E-12    |
| ENSG00000039123 | 820.427178  | 0.080456764  | 0.077664586 | 1.035951756  | 0.30022465  | 0.47062333  |
| ENSG00000039319 | 458.6461872 | -0.672173623 | 0.099111358 | -6.782003963 | 1.19E-11    | 2.07E-10    |
| ENSG00000039523 | 600.3230206 | 1.148784401  | 0.090700529 | 12.66568574  | 9.16E-37    | 6.31E-35    |
| ENSG00000039560 | 514.9951623 | 0.349777199  | 0.089023498 | 3.929043528  | 8.53E-05    | 0.000499996 |
| ENSG00000039650 | 288.9400197 | -0.089964418 | 0.116219954 | -0.774087534 | 0.438879029 | 0.604227552 |
| ENSG00000040199 | 322.3673854 | 0.549138134  | 0.113443264 | 4.840641158  | 1.29E-06    | 1.12E-05    |
| ENSG00000040275 | 192.1514827 | -0.203989892 | 0.137855544 | -1.479736582 | 0.138943559 | 0.269577372 |
| ENSG00000040341 | 280.7844524 | -0.831992108 | 0.114460626 | -7.26880619  | 3.63E-13    | 7.54E-12    |
| ENSG00000040487 | 203.0092657 | 0.276342763  | 0.130846718 | 2.111957935  | 0.034690057 | 0.090768141 |
| ENSG00000040531 | 153.2922758 | 0.350123943  | 0.147810899 | 2.368728864  | 0.017849333 | 0.052641105 |
| ENSG00000040608 | 40.74502006 | 0.176475751  | 0.27549671  | 0.64057299   | 0.521800153 | 0.675986973 |
| ENSG00000040633 | 283.1551272 | 0.408042415  | 0.113109951 | 3.60748466   | 0.00030918  | 0.00158044  |
| ENSG00000040731 | 97.4167871  | 5.65704701   | 0.4336341   | 13.04566918  | 6.73E-39    | 5.05E-37    |
| ENSG00000040933 | 238.9094173 | -0.025894288 | 0.123247336 | -0.210100183 | 0.833589482 | 0.902460999 |
| ENSG00000041357 | 1098.254315 | 0.188628151  | 0.079646783 | 2.368308474  | 0.01786963  | 0.052666568 |
| ENSG00000041802 | 219.9291308 | 0.336330128  | 0.126076187 | 2.667673703  | 0.00763784  | 0.025716379 |
| ENSG00000041880 | 98.54590989 | 0.094777344  | 0.183224746 | 0.517273707  | 0.604965106 | 0.742113775 |
| ENSG00000041988 | 43.28383503 | -0.388124411 | 0.268500654 | -1.445525013 | 0.148310472 | 0.282483689 |
| ENSG00000042062 | 6.506801409 | -1.389859012 | 0.721146996 | -1.92728947  | 0.053943565 | 0.12941849  |
| ENSG00000042088 | 251.5171827 | -0.002380805 | 0.116952186 | -0.02035708  | 0.983758522 | 0.991961125 |
| ENSG00000042286 | 17.2289231  | -1.296374399 | 0.445638697 | -2.909025648 | 0.003625571 | 0.01360469  |
| ENSG00000042317 | 20.2245769  | -0.656299729 | 0.396427779 | -1.655534156 | 0.097816194 | 0.206114597 |
| ENSG00000042429 | 157.5955535 | 0.505411751  | 0.158240772 | 3.193941389  | 0.001403446 | 0.006032499 |
| ENSG00000042445 | 105.3305476 | -0.371412229 | 0.175396563 | -2.117557057 | 0.034212598 | 0.089795286 |
| ENSG00000042493 | 10.19181321 | -2.549324842 | 0.671649021 | -3.795620575 | 0.000147275 | 0.000814475 |
| ENSG00000042753 | 548.3107494 | -0.013399662 | 0.102758518 | -0.130399523 | 0.896250344 | 0.943750269 |
| ENSG00000043093 | 114.247659  | -0.359250026 | 0.168785981 | -2.128435223 | 0.033301015 | 0.08774702  |
| ENSG00000043143 | 608.7358888 | 0.436562507  | 0.084477623 | 5.167788719  | 2.37E-07    | 2.36E-06    |
| ENSG00000043355 | 47.92042091 | -1.168856613 | 0.267575044 | -4.368331945 | 1.25E-05    | 8.78E-05    |
| ENSG00000043514 | 236.7820417 | 0.003949208  | 0.122034007 | 0.032361536  | 0.974183736 | 0.986686779 |
| ENSG00000043591 | 7.644623827 | -3.785428885 | 0.992092168 | -3.815602024 | 0.000135851 | 0.000759071 |

|                 |             |              |             |              |             |             |
|-----------------|-------------|--------------|-------------|--------------|-------------|-------------|
| ENSG00000044090 | 408.1332099 | 0.19303999   | 0.098608032 | 1.957649763  | 0.050271124 | 0.122342078 |
| ENSG00000044115 | 1540.408935 | 0.290166988  | 0.063985655 | 4.534875603  | 5.76E-06    | 4.36E-05    |
| ENSG00000044446 | 351.1182005 | 0.127449515  | 0.105187135 | 1.211645468  | 0.225648122 | 0.384017345 |
| ENSG00000044459 | 344.6221021 | -0.249092155 | 0.106348713 | -2.342220671 | 0.019169377 | 0.055773041 |
| ENSG00000044524 | 84.79274632 | 3.74428343   | 0.280285109 | 13.35883821  | 1.05E-40    | 8.44E-39    |
| ENSG00000044574 | 3212.98136  | 0.418109095  | 0.063403966 | 6.594368218  | 4.27E-11    | 7.09E-10    |
| ENSG00000046604 | 51.15290069 | 0.188563974  | 0.260281326 | 0.724462169  | 0.468782045 | 0.630926644 |
| ENSG00000046647 | 50.05185264 | -0.070997977 | 0.248179472 | -0.286075137 | 0.774820574 | 0.865106478 |
| ENSG00000046651 | 237.2201978 | 0.265708965  | 0.125666369 | 2.114399956  | 0.034481121 | 0.090331278 |
| ENSG00000046653 | 11.67546023 | -1.98919069  | 0.583515089 | -3.408979011 | 0.000652065 | 0.003066474 |
| ENSG00000047056 | 190.4711265 | 0.181602226  | 0.133145139 | 1.363941835  | 0.172585873 | 0.316136399 |
| ENSG00000047188 | 620.6425972 | -0.098167233 | 0.088595497 | -1.108038635 | 0.267845131 | 0.434710636 |
| ENSG00000047230 | 181.9366356 | 0.106284913  | 0.137487758 | 0.773050015  | 0.439492781 | 0.604795228 |
| ENSG00000047249 | 166.8917322 | -0.187225216 | 0.152142354 | -1.230592344 | 0.21847537  | 0.375499801 |
| ENSG00000047315 | 771.0800038 | 0.052940598  | 0.086282062 | 0.613575949  | 0.539495581 | 0.689580557 |
| ENSG00000047346 | 155.4172723 | 0.075839569  | 0.146271677 | 0.518484307  | 0.604120407 | 0.741660492 |
| ENSG00000047365 | 163.3329182 | -0.069835012 | 0.148988642 | -0.468727084 | 0.639264725 | 0.767106748 |
| ENSG00000047410 | 4382.835611 | 0.185538251  | 0.059223821 | 3.132831476  | 0.001731288 | 0.007233612 |
| ENSG00000047578 | 147.6012041 | -0.084211871 | 0.155422045 | -0.541827072 | 0.58793764  | 0.729572441 |
| ENSG00000047579 | 193.0253668 | 0.549542075  | 0.136759715 | 4.018303755  | 5.86E-05    | 0.000354462 |
| ENSG00000047597 | 40.25912264 | 0.02950048   | 0.280788839 | 0.105062865  | 0.916325926 | 0.954797884 |
| ENSG00000047621 | 84.67903576 | -0.142594773 | 0.196063237 | -0.727289699 | 0.467048507 | 0.629196354 |
| ENSG00000047644 | 258.3739712 | 0.367973127  | 0.119622328 | 3.076124098  | 0.002097105 | 0.008494245 |
| ENSG00000047849 | 2410.089734 | 0.117647667  | 0.064828635 | 1.814748467  | 0.069562573 | 0.158264883 |
| ENSG00000047932 | 351.5460238 | 0.091630705  | 0.109500158 | 0.836808888  | 0.402700001 | 0.570982831 |
| ENSG00000048028 | 236.0887733 | 0.066329056  | 0.125067578 | 0.530345736  | 0.595872242 | 0.735455354 |
| ENSG00000048052 | 715.7346445 | 0.262360462  | 0.088584497 | 2.961697246  | 0.003059485 | 0.011742384 |
| ENSG00000048140 | 175.2482555 | 0.247605491  | 0.143461554 | 1.725936213  | 0.084358889 | 0.184090308 |
| ENSG00000048162 | 279.9025441 | 0.303146147  | 0.117158149 | 2.587495182  | 0.009667655 | 0.031370189 |
| ENSG00000048342 | 351.920247  | -0.238940736 | 0.111511266 | -2.142749743 | 0.032133199 | 0.085052769 |
| ENSG00000048392 | 299.7334769 | -0.404962183 | 0.10996444  | -3.682664886 | 0.000230808 | 0.001215661 |
| ENSG00000048405 | 358.82254   | 0.769962134  | 0.104668054 | 7.356228614  | 1.89E-13    | 4.05E-12    |
| ENSG00000048471 | 95.7292828  | -0.695460729 | 0.183197148 | -3.796242121 | 0.000146906 | 0.000813178 |
| ENSG00000048540 | 36.63177442 | 1.801798431  | 0.31232747  | 5.768939987  | 7.98E-09    | 9.94E-08    |
| ENSG00000048544 | 157.4821553 | 0.527614337  | 0.15101527  | 3.493781377  | 0.000476231 | 0.002319561 |
| ENSG00000048649 | 1240.093449 | -0.117674669 | 0.071081718 | -1.6554843   | 0.097826299 | 0.206114597 |
| ENSG00000048707 | 618.2155169 | -0.120955047 | 0.08663194  | -1.396194602 | 0.162655902 | 0.302786569 |
| ENSG00000048828 | 1592.166103 | 0.376772     | 0.063176492 | 5.963800625  | 2.46E-09    | 3.27E-08    |
| ENSG00000048991 | 1243.601663 | 0.04099927   | 0.077937734 | 0.526051596  | 0.598852359 | 0.737617016 |
| ENSG00000049089 | 19.29316452 | 0.22773434   | 0.412763182 | 0.551731236  | 0.581132506 | 0.723664022 |
| ENSG00000049167 | 180.9145206 | -0.40567815  | 0.138434259 | -2.930475113 | 0.003384441 | 0.012817806 |
| ENSG00000049192 | 91.32416512 | -0.889013803 | 0.200118805 | -4.442430106 | 8.89E-06    | 6.45E-05    |
| ENSG00000049239 | 466.3053441 | -0.462018088 | 0.097717794 | -4.72808551  | 2.27E-06    | 1.87E-05    |
| ENSG00000049245 | 231.0977095 | 0.121144144  | 0.123046083 | 0.984542867  | 0.324848665 | 0.49685858  |
| ENSG00000049246 | 235.6287237 | 0.317069812  | 0.124746295 | 2.541717275  | 0.011030936 | 0.035048984 |
| ENSG00000049323 | 88.15576878 | -0.853215036 | 0.208984741 | -4.08266666  | 4.45E-05    | 0.000277093 |
| ENSG00000049449 | 495.9705985 | 0.060139346  | 0.102853277 | 0.58471006   | 0.558742689 | 0.705687696 |
| ENSG00000049541 | 492.1600129 | -0.045954232 | 0.09166347  | -0.501336374 | 0.61613441  | 0.750506422 |
| ENSG00000049618 | 735.0264107 | -0.280382084 | 0.088678928 | -3.16176674  | 0.001568151 | 0.006628896 |
| ENSG00000049656 | 714.855092  | 0.452908704  | 0.081539609 | 5.554462565  | 2.78E-08    | 3.20E-07    |

|                 |             |              |             |              |             |             |
|-----------------|-------------|--------------|-------------|--------------|-------------|-------------|
| ENSG00000049759 | 246.8657851 | 0.170451075  | 0.121023706 | 1.408410633  | 0.159009512 | 0.297536515 |
| ENSG00000049768 | 12.42916949 | 0.176670882  | 0.48634211  | 0.363264621  | 0.716407219 | 0.823449162 |
| ENSG00000049769 | 30.95634287 | -0.868346804 | 0.33104084  | -2.623080598 | 0.008713866 | 0.028733256 |
| ENSG00000049860 | 1061.520516 | 0.574508989  | 0.07873062  | 7.297148078  | 2.94E-13    | 6.17E-12    |
| ENSG00000049883 | 150.5806404 | -0.035200237 | 0.147256553 | -0.23904021  | 0.811074404 | 0.888702196 |
| ENSG00000050030 | 21.02645142 | -3.411294982 | 0.552487385 | -6.174430535 | 6.64E-10    | 9.50E-09    |
| ENSG00000050130 | 112.929225  | -0.059423412 | 0.168821127 | -0.351990375 | 0.724845481 | 0.829602619 |
| ENSG00000050165 | 46.31577795 | -0.190549675 | 0.268165091 | -0.710568531 | 0.47735165  | 0.637876581 |
| ENSG00000050344 | 69.81048535 | 0.266040857  | 0.209991559 | 1.266912151  | 0.205186703 | 0.358682061 |
| ENSG00000050393 | 220.3704235 | -0.306692986 | 0.127790644 | -2.39996432  | 0.01639667  | 0.049078207 |
| ENSG00000050405 | 382.504054  | -0.467500558 | 0.104428881 | -4.47673626  | 7.58E-06    | 5.58E-05    |
| ENSG00000050426 | 147.5146972 | 0.459689545  | 0.149173599 | 3.081574411  | 0.00205909  | 0.008366803 |
| ENSG00000050438 | 83.18278482 | -0.465242947 | 0.19848078  | -2.344020145 | 0.019077141 | 0.055527683 |
| ENSG00000050555 | 238.5135708 | 0.626766699  | 0.147547311 | 4.24790323   | 2.16E-05    | 0.000143925 |
| ENSG00000050748 | 233.3568602 | -0.205233907 | 0.128177074 | -1.601174856 | 0.109338196 | 0.224970506 |
| ENSG00000050767 | 73.00383508 | -1.468686334 | 0.225046023 | -6.526159924 | 6.75E-11    | 1.10E-09    |
| ENSG00000050820 | 360.4126948 | 0.365969766  | 0.114690907 | 3.190922229  | 0.001418194 | 0.006086581 |
| ENSG00000051009 | 123.845509  | -0.177521551 | 0.181423    | -0.978495289 | 0.32782942  | 0.500219407 |
| ENSG00000051108 | 342.6000865 | 0.136443618  | 0.11169435  | 1.221580303  | 0.221866381 | 0.379790038 |
| ENSG00000051128 | 73.34470989 | 0.28500968   | 0.222426457 | 1.281365909  | 0.200065173 | 0.352125733 |
| ENSG00000051180 | 110.3550442 | -0.217104661 | 0.176480805 | -1.23018852  | 0.218626518 | 0.375663204 |
| ENSG00000051341 | 433.1319945 | -0.600559819 | 0.102316971 | -5.869601219 | 4.37E-09    | 5.60E-08    |
| ENSG00000051382 | 226.1811777 | -0.283177011 | 0.123473274 | -2.293427568 | 0.021823401 | 0.061967519 |
| ENSG00000051523 | 19.19312325 | 0.861682221  | 0.442414054 | 1.94768275   | 0.051452935 | 0.124635176 |
| ENSG00000051596 | 139.8619056 | 0.590860863  | 0.163038616 | 3.624054695  | 0.00029002  | 0.001494466 |
| ENSG00000051620 | 104.2135269 | 0.214191611  | 0.175898208 | 1.217702065  | 0.223337212 | 0.381703105 |
| ENSG00000051825 | 285.6512615 | 0.113433706  | 0.116044052 | 0.97750556   | 0.328318927 | 0.500640031 |
| ENSG00000052126 | 1033.438003 | -0.179744639 | 0.075376682 | -2.384618603 | 0.017096836 | 0.050859648 |
| ENSG00000052723 | 343.705215  | -0.161679413 | 0.11333216  | -1.426597818 | 0.153695853 | 0.290346682 |
| ENSG00000052749 | 462.0341324 | 0.277610454  | 0.103556741 | 2.680756954  | 0.007345585 | 0.024839534 |
| ENSG00000052795 | 217.6122787 | 0.243861938  | 0.125874733 | 1.937338275  | 0.052704006 | 0.127074009 |
| ENSG00000052802 | 403.7771541 | 0.370709216  | 0.110003767 | 3.36996837   | 0.000751768 | 0.003480582 |
| ENSG00000052841 | 768.0311554 | -0.245543126 | 0.080164808 | -3.06297904  | 0.002191454 | 0.008818281 |
| ENSG00000053254 | 598.7526773 | -0.089648319 | 0.089825874 | -0.998023339 | 0.318268042 | 0.48997802  |
| ENSG00000053328 | 28.91558005 | -1.978864455 | 0.371570283 | -5.325680075 | 1.01E-07    | 1.06E-06    |
| ENSG00000053371 | 412.4293952 | 0.324427201  | 0.121803379 | 2.66353202   | 0.007732505 | 0.025985287 |
| ENSG00000053372 | 521.295838  | 0.21373377   | 0.092698979 | 2.305675566  | 0.021128767 | 0.060422597 |
| ENSG00000053501 | 151.5340225 | 0.762552144  | 0.159684247 | 4.775374886  | 1.79E-06    | 1.50E-05    |
| ENSG00000053524 | 19.36725296 | 0.484400296  | 0.39726848  | 1.219327282  | 0.222719998 | 0.380926313 |
| ENSG00000053770 | 174.6147247 | -0.290394011 | 0.144525549 | -2.009291866 | 0.04450619  | 0.111281319 |
| ENSG00000053900 | 172.2433309 | -0.20578977  | 0.141560727 | -1.453720776 | 0.146023736 | 0.279482264 |
| ENSG00000054116 | 290.6964425 | -0.328858464 | 0.113049437 | -2.908979236 | 0.003626109 | 0.01360469  |
| ENSG00000054118 | 2654.734731 | 0.129281403  | 0.05929013  | 2.180487757  | 0.029221325 | 0.078781864 |
| ENSG00000054148 | 307.4261893 | -0.030329424 | 0.117442614 | -0.258248888 | 0.79621483  | 0.878366283 |
| ENSG00000054179 | 192.648462  | 0.891031578  | 0.145225678 | 6.135496062  | 8.49E-10    | 1.19E-08    |
| ENSG00000054267 | 788.967232  | 0.037201734  | 0.081642457 | 0.455666518  | 0.648629802 | 0.7738494   |
| ENSG00000054277 | 45.59194943 | 0.141748719  | 0.259541845 | 0.54614977   | 0.584962991 | 0.726908628 |
| ENSG00000054282 | 175.7897303 | 0.052881903  | 0.138646838 | 0.381414417  | 0.702895765 | 0.814114183 |
| ENSG00000054523 | 934.7275507 | 0.085494525  | 0.077075802 | 1.109226541  | 0.267332466 | 0.434229781 |
| ENSG00000054598 | 366.9324241 | -1.092362438 | 0.107015032 | -10.20756073 | 1.83E-24    | 7.86E-23    |

|                 |             |              |             |              |             |             |
|-----------------|-------------|--------------|-------------|--------------|-------------|-------------|
| ENSG00000054611 | 147.2284964 | -0.079570151 | 0.15224129  | -0.522658152 | 0.601212165 | 0.739437208 |
| ENSG00000054654 | 443.1293895 | -0.599460166 | 0.097852566 | -6.126156825 | 9.00E-10    | 1.26E-08    |
| ENSG00000054690 | 154.1764632 | -0.48158622  | 0.149520653 | -3.22086755  | 0.001278032 | 0.005559713 |
| ENSG00000054793 | 407.4455755 | -0.783806757 | 0.113356176 | -6.914548344 | 4.69E-12    | 8.63E-11    |
| ENSG00000054965 | 669.1645444 | 0.820288574  | 0.082685248 | 9.920615729  | 3.39E-23    | 1.35E-21    |
| ENSG00000054967 | 73.62481613 | 0.744836703  | 0.223272111 | 3.336004204  | 0.000849919 | 0.003881277 |
| ENSG00000054983 | 183.5888881 | -0.161244202 | 0.137447654 | -1.173131711 | 0.240742992 | 0.403257429 |
| ENSG00000055044 | 1290.73409  | 0.20852118   | 0.067400356 | 3.093769708  | 0.001976308 | 0.008096005 |
| ENSG00000055070 | 1112.024845 | 0.102416817  | 0.076746499 | 1.334481949  | 0.182045959 | 0.328815685 |
| ENSG00000055118 | 234.3104211 | 0.226149212  | 0.132189781 | 1.710791942  | 0.087119528 | 0.188470422 |
| ENSG00000055130 | 820.6290098 | 0.523111443  | 0.086348999 | 6.058106656  | 1.38E-09    | 1.89E-08    |
| ENSG00000055147 | 102.4482684 | 0.336360421  | 0.189092942 | 1.778810024  | 0.075270913 | 0.16793997  |
| ENSG00000055163 | 400.4994489 | 0.155832992  | 0.103618504 | 1.503910847  | 0.132604324 | 0.260735293 |
| ENSG00000055208 | 555.4079661 | 0.010447816  | 0.094354003 | 0.110729967  | 0.911830482 | 0.952735327 |
| ENSG00000055211 | 136.9144869 | 0.213525485  | 0.155183107 | 1.375958309  | 0.168834541 | 0.311358645 |
| ENSG00000055332 | 1881.592466 | 0.28479885   | 0.070241664 | 4.054557292  | 5.02E-05    | 0.000308919 |
| ENSG00000055483 | 1142.840482 | 0.244544188  | 0.070115545 | 3.487731412  | 0.000487137 | 0.002366119 |
| ENSG00000055609 | 2399.454419 | 0.442403762  | 0.069743463 | 6.343300783  | 2.25E-10    | 3.41E-09    |
| ENSG00000055732 | 109.9972771 | -1.830091751 | 0.198312139 | -9.228339532 | 2.75E-20    | 9.46E-19    |
| ENSG00000055917 | 1348.694872 | -0.070979745 | 0.068850779 | -1.030921449 | 0.302577658 | 0.47320289  |
| ENSG00000055950 | 202.6883072 | 0.267146716  | 0.128398683 | 2.080603245  | 0.037470237 | 0.096576957 |
| ENSG00000056050 | 111.5146646 | 0.133887154  | 0.173835279 | 0.770195522  | 0.44118392  | 0.606449801 |
| ENSG00000056097 | 1110.235307 | 0.06820799   | 0.072372265 | 0.942460344  | 0.345957005 | 0.517756025 |
| ENSG00000056277 | 255.4564318 | 0.150208549  | 0.125412113 | 1.19771963   | 0.231026185 | 0.390477983 |
| ENSG00000056487 | 114.721223  | -0.653952611 | 0.177738473 | -3.67929689  | 0.000233878 | 0.001229062 |
| ENSG00000056558 | 29.49249024 | -0.261572373 | 0.323693082 | -0.808087622 | 0.419040143 | 0.58692361  |
| ENSG00000056586 | 628.9177548 | 0.000430055  | 0.092387796 | 0.004654885  | 0.996285953 | 0.998279095 |
| ENSG00000056736 | 23.57921787 | -1.870427016 | 0.412007924 | -4.539784083 | 5.63E-06    | 4.27E-05    |
| ENSG00000056972 | 215.6861363 | 0.500676913  | 0.128230468 | 3.904508193  | 9.44E-05    | 0.00054661  |
| ENSG00000056998 | 133.6881001 | -1.713097888 | 0.171189878 | -10.00700454 | 1.42E-23    | 5.76E-22    |
| ENSG00000057019 | 354.7059406 | -0.566358714 | 0.106489797 | -5.318431716 | 1.05E-07    | 1.10E-06    |
| ENSG00000057252 | 419.3269918 | -0.03330666  | 0.097841495 | -0.340414463 | 0.733544429 | 0.835693316 |
| ENSG00000057294 | 37.42005864 | -0.034843067 | 0.288376876 | -0.120824761 | 0.903829838 | 0.948177575 |
| ENSG00000057468 | 14.32581345 | 0.544231713  | 0.456414511 | 1.192406682  | 0.233101822 | 0.393279993 |
| ENSG00000057608 | 999.5671154 | 0.036624351  | 0.075233737 | 0.486807548  | 0.626394721 | 0.757486798 |
| ENSG00000057663 | 102.2011341 | 0.051875434  | 0.179032376 | 0.289754489  | 0.772004068 | 0.86337203  |
| ENSG00000057757 | 209.8903916 | -0.101123374 | 0.128724093 | -0.785582336 | 0.432112216 | 0.598430475 |
| ENSG00000057935 | 846.0031726 | -0.028302808 | 0.075499218 | -0.374875513 | 0.707753051 | 0.816776792 |
| ENSG00000058056 | 151.8901348 | -0.213245394 | 0.148822567 | -1.43288346  | 0.151891145 | 0.288053856 |
| ENSG00000058063 | 212.6726392 | -0.349952571 | 0.128495103 | -2.723470089 | 0.006460006 | 0.022224764 |
| ENSG00000058262 | 1275.732974 | 0.248341257  | 0.06955086  | 3.570642526  | 0.000356107 | 0.00179163  |
| ENSG00000058272 | 1028.909948 | -0.04875121  | 0.079631545 | -0.612209777 | 0.540398974 | 0.690340523 |
| ENSG00000058453 | 473.4794059 | 0.492950124  | 0.104042683 | 4.7379605    | 2.16E-06    | 1.79E-05    |
| ENSG00000058600 | 514.60134   | 0.31088948   | 0.094238162 | 3.298976479  | 0.00097038  | 0.004369655 |
| ENSG00000058668 | 350.5410477 | -0.669507823 | 0.104183043 | -6.426264832 | 1.31E-10    | 2.03E-09    |
| ENSG00000058673 | 15.65320191 | 0.26373482   | 0.443120823 | 0.595175866  | 0.551725921 | 0.699340733 |
| ENSG00000058729 | 169.2686108 | 0.322047849  | 0.142125132 | 2.26594582   | 0.023454701 | 0.065738606 |
| ENSG00000058799 | 49.35810811 | 0.17327076   | 0.249855418 | 0.693484101  | 0.4880058   | 0.647922265 |
| ENSG00000058804 | 384.7476881 | 0.030660806  | 0.098528005 | 0.311188744  | 0.755657139 | 0.852102835 |
| ENSG00000059122 | 151.338631  | -0.022355682 | 0.148100038 | -0.150949876 | 0.880015256 | 0.934004754 |

|                 |             |              |             |              |             |             |
|-----------------|-------------|--------------|-------------|--------------|-------------|-------------|
| ENSG00000059145 | 75.37474712 | 0.669790274  | 0.212562443 | 3.151028309  | 0.001626967 | 0.006854832 |
| ENSG00000059573 | 762.8443225 | 0.051629205  | 0.078916533 | 0.65422545   | 0.512966568 | 0.668923262 |
| ENSG00000059588 | 291.6548378 | -0.242421845 | 0.120685754 | -2.008703069 | 0.044568633 | 0.111417617 |
| ENSG00000059691 | 182.3725414 | 0.052723734  | 0.136480853 | 0.386308648  | 0.699268096 | 0.811250326 |
| ENSG00000059728 | 150.2446423 | 0.382344205  | 0.152734138 | 2.503331676  | 0.012303019 | 0.038481519 |
| ENSG00000059758 | 153.7173258 | -0.222905453 | 0.148786179 | -1.498159675 | 0.13409177  | 0.262667283 |
| ENSG00000059769 | 44.91865893 | 0.150385077  | 0.2675229   | 0.562139081  | 0.574021263 | 0.718419883 |
| ENSG00000059804 | 353.1228511 | -0.621857822 | 0.109929201 | -5.65689387  | 1.54E-08    | 1.84E-07    |
| ENSG00000059915 | 60.36631195 | 0.693278568  | 0.226953189 | 3.054720547  | 0.002252703 | 0.009051408 |
| ENSG00000060069 | 201.2018825 | 0.383349772  | 0.134846117 | 2.842868446  | 0.004470952 | 0.016282983 |
| ENSG00000060138 | 1317.347145 | -0.447596039 | 0.087353724 | -5.12394911  | 2.99E-07    | 2.92E-06    |
| ENSG00000060237 | 2992.952798 | -0.246846522 | 0.060356791 | -4.089788705 | 4.32E-05    | 0.000269317 |
| ENSG00000060339 | 1394.769231 | 0.109948858  | 0.073826967 | 1.48927774   | 0.136414247 | 0.265918808 |
| ENSG00000060491 | 397.111256  | 0.412078394  | 0.102035288 | 4.038587073  | 5.38E-05    | 0.000327565 |
| ENSG00000060642 | 59.15288115 | 0.024657756  | 0.27168939  | 0.090757154  | 0.927685556 | 0.960604431 |
| ENSG00000060656 | 84.32696016 | -1.710048038 | 0.219543737 | -7.789099623 | 6.75E-15    | 1.60E-13    |
| ENSG00000060688 | 736.1809845 | 0.157898976  | 0.07909772  | 1.996251938  | 0.045906507 | 0.113991285 |
| ENSG00000060718 | 2424.576655 | -4.804218168 | 0.092226    | -52.09179826 | 0           | 0           |
| ENSG00000060749 | 1287.552576 | 0.034757627  | 0.076040823 | 0.457091678  | 0.647605152 | 0.773169561 |
| ENSG00000060762 | 51.19700059 | -0.228490703 | 0.252131567 | -0.906236002 | 0.364810951 | 0.535979441 |
| ENSG00000060971 | 184.4684222 | 0.536164501  | 0.135791771 | 3.948431472  | 7.87E-05    | 0.000463704 |
| ENSG00000060982 | 902.0989815 | 0.008271893  | 0.076829745 | 0.10766524   | 0.914261244 | 0.953636867 |
| ENSG00000061273 | 220.7970281 | -0.170746562 | 0.125994251 | -1.355193276 | 0.175355986 | 0.31987728  |
| ENSG00000061656 | 45.79176028 | -0.122664157 | 0.255262378 | -0.480541462 | 0.630842428 | 0.760980193 |
| ENSG00000061676 | 980.6880364 | 0.20844851   | 0.0715669   | 2.912638523  | 0.003583892 | 0.013482306 |
| ENSG00000061794 | 299.4354287 | 0.271413481  | 0.113927583 | 2.382333363  | 0.017203316 | 0.051111459 |
| ENSG00000061918 | 11.54305344 | -3.523694791 | 0.782206339 | -4.504814929 | 6.64E-06    | 4.94E-05    |
| ENSG00000061936 | 503.1795859 | 0.239053123  | 0.090931094 | 2.628948049  | 0.008564944 | 0.02836204  |
| ENSG00000061938 | 230.9043142 | 0.02555489   | 0.139498022 | 0.183191772  | 0.85464755  | 0.916518175 |
| ENSG00000061987 | 465.8107261 | -0.020205451 | 0.092440904 | -0.218576947 | 0.826979612 | 0.898668717 |
| ENSG00000062038 | 14.34085566 | -0.9048292   | 0.502744941 | -1.799777831 | 0.071895726 | 0.162219309 |
| ENSG00000062194 | 343.275341  | -0.175086738 | 0.108790973 | -1.609386638 | 0.107531825 | 0.222066973 |
| ENSG00000062282 | 36.38462424 | 0.139363128  | 0.290480119 | 0.479768213  | 0.631392218 | 0.761420933 |
| ENSG00000062370 | 33.33815569 | -0.206900271 | 0.323484162 | -0.639599386 | 0.522433082 | 0.676307944 |
| ENSG00000062485 | 883.1131339 | -0.044955612 | 0.095969499 | -0.468436457 | 0.639472502 | 0.767224995 |
| ENSG00000062582 | 10.94251307 | 1.298821655  | 0.552644987 | 2.350191689  | 0.018763745 | 0.054809174 |
| ENSG00000062598 | 198.9880445 | -0.57488939  | 0.133595452 | -4.303210785 | 1.68E-05    | 0.000114861 |
| ENSG00000062650 | 894.2533169 | -0.13492244  | 0.074601293 | -1.808580444 | 0.070516209 | 0.159945291 |
| ENSG00000062716 | 1164.16772  | -0.516609549 | 0.079604076 | -6.489737372 | 8.60E-11    | 1.38E-09    |
| ENSG00000062725 | 297.5099771 | -0.033410085 | 0.109429499 | -0.305311509 | 0.760128911 | 0.85522874  |
| ENSG00000062822 | 393.0136603 | 0.088974241  | 0.102699073 | 0.866358754  | 0.386293456 | 0.555102336 |
| ENSG00000063046 | 3134.501946 | -0.139344016 | 0.065408047 | -2.130380312 | 0.033140228 | 0.087388921 |
| ENSG00000063127 | 82.61148694 | -0.227445038 | 0.200594015 | -1.133857544 | 0.256854309 | 0.422535821 |
| ENSG00000063169 | 291.8804619 | -0.008485165 | 0.114181269 | -0.074313106 | 0.940761249 | 0.967262249 |
| ENSG00000063176 | 108.282197  | 0.675127651  | 0.17915369  | 3.768427265  | 0.000164279 | 0.000897562 |
| ENSG00000063177 | 3839.311627 | 0.169281948  | 0.063063043 | 2.684328902  | 0.007267557 | 0.024640931 |
| ENSG00000063180 | 852.9986671 | 0.282548582  | 0.091580536 | 3.085247093  | 0.002033831 | 0.008285738 |
| ENSG00000063241 | 183.6510986 | -0.767590348 | 0.139463782 | -5.503868718 | 3.72E-08    | 4.21E-07    |
| ENSG00000063244 | 1816.121334 | 0.189623627  | 0.075364127 | 2.516099306  | 0.011866174 | 0.037281179 |
| ENSG00000063245 | 629.5178245 | -0.019134335 | 0.093073807 | -0.205582384 | 0.83711714  | 0.905024587 |

|                 |             |              |             |              |             |             |
|-----------------|-------------|--------------|-------------|--------------|-------------|-------------|
| ENSG00000063322 | 195.6356042 | -0.276785973 | 0.132917163 | -2.082394521 | 0.037306449 | 0.096296156 |
| ENSG00000063587 | 175.4717477 | 0.289975152  | 0.139508966 | 2.078541335  | 0.037659528 | 0.097011441 |
| ENSG00000063601 | 249.4632634 | 0.314295525  | 0.119397622 | 2.632343256  | 0.008479814 | 0.028137    |
| ENSG00000063660 | 375.2477478 | 0.162119497  | 0.120828258 | 1.341734947  | 0.179681952 | 0.325676436 |
| ENSG00000063761 | 51.07291866 | -0.064685467 | 0.242461237 | -0.266786839 | 0.789633288 | 0.874348005 |
| ENSG00000063854 | 146.6762519 | 0.157179903  | 0.15369991  | 1.022641477  | 0.306477391 | 0.47752037  |
| ENSG00000063978 | 545.7196095 | 0.089761921  | 0.089424653 | 1.003771536  | 0.315488747 | 0.486941084 |
| ENSG00000064012 | 192.1040522 | -0.246630085 | 0.133296383 | -1.850238397 | 0.064279197 | 0.148826418 |
| ENSG00000064102 | 409.3850729 | 0.438940855  | 0.097286534 | 4.51183566   | 6.43E-06    | 4.80E-05    |
| ENSG00000064115 | 456.6005567 | 0.123949629  | 0.09306328  | 1.331885455  | 0.182897831 | 0.329996851 |
| ENSG00000064199 | 90.78082356 | -0.653398875 | 0.204290025 | -3.198388546 | 0.001381979 | 0.00596006  |
| ENSG00000064225 | 21.09956696 | 0.113187455  | 0.376142494 | 0.300916427  | 0.763478224 | 0.857280464 |
| ENSG00000064309 | 146.460546  | 0.044578316  | 0.153803023 | 0.289840308  | 0.771938409 | 0.86337203  |
| ENSG00000064313 | 734.3171821 | 0.089373256  | 0.085784071 | 1.041839769  | 0.297485973 | 0.468106358 |
| ENSG00000064393 | 407.8514772 | -0.224190343 | 0.09615709  | -2.331500904 | 0.019726962 | 0.057111426 |
| ENSG00000064419 | 913.5607733 | 0.479052502  | 0.074861893 | 6.399150269  | 1.56E-10    | 2.41E-09    |
| ENSG00000064490 | 182.8072677 | -0.435940865 | 0.139439548 | -3.126378925 | 0.001769734 | 0.007359221 |
| ENSG00000064545 | 245.1418441 | 0.318302645  | 0.132817557 | 2.396540428  | 0.016550668 | 0.049465368 |
| ENSG00000064547 | 23.47962526 | -0.325225474 | 0.375193024 | -0.866821751 | 0.386039682 | 0.554865386 |
| ENSG00000064601 | 805.5643457 | 0.922138273  | 0.080722237 | 11.42359661  | 3.19E-30    | 1.74E-28    |
| ENSG00000064607 | 1136.867417 | -0.057831751 | 0.078995778 | -0.732086609 | 0.464115707 | 0.627026563 |
| ENSG00000064651 | 361.7272958 | -0.059106857 | 0.116078134 | -0.509198892 | 0.61061282  | 0.746810014 |
| ENSG00000064652 | 55.23354016 | -0.337256182 | 0.256601795 | -1.314317316 | 0.188739442 | 0.337692389 |
| ENSG00000064666 | 707.8552805 | -1.013609957 | 0.084975555 | -11.92825351 | 8.43E-33    | 5.02E-31    |
| ENSG00000064687 | 475.6663363 | -0.058014878 | 0.108087847 | -0.536738212 | 0.591448457 | 0.732133279 |
| ENSG00000064703 | 216.8701116 | -0.10082464  | 0.127269225 | -0.792215397 | 0.428235092 | 0.59540912  |
| ENSG00000064726 | 822.9916469 | 0.190881955  | 0.079793455 | 2.392200645  | 0.016747684 | 0.049969141 |
| ENSG00000064763 | 62.64352669 | 4.4161414    | 0.38032421  | 11.61151797  | 3.60E-31    | 2.06E-29    |
| ENSG00000064835 | 18.87243745 | -7.518352965 | 1.220803559 | -6.158528054 | 7.34E-10    | 1.04E-08    |
| ENSG00000064932 | 504.3694507 | 0.992034564  | 0.101265866 | 9.79633713   | 1.17E-22    | 4.52E-21    |
| ENSG00000064933 | 254.8190681 | -0.21089617  | 0.127316685 | -1.65646922  | 0.097626833 | 0.205786934 |
| ENSG00000064961 | 597.4425077 | 0.219467764  | 0.086094841 | 2.549139543  | 0.010798908 | 0.034412945 |
| ENSG00000064989 | 72.3933081  | -2.200386175 | 0.265368239 | -8.291821906 | 1.12E-16    | 3.01E-15    |
| ENSG00000064995 | 423.4919285 | -0.452164589 | 0.095896808 | -4.715116147 | 2.42E-06    | 1.98E-05    |
| ENSG00000064999 | 345.3174327 | 0.107273505  | 0.108836467 | 0.985639358  | 0.324310117 | 0.496196952 |
| ENSG00000065000 | 2088.037161 | 0.091508161  | 0.061111102 | 1.497406491  | 0.13428752  | 0.262904084 |
| ENSG00000065029 | 238.8591571 | 0.113738293  | 0.120090988 | 0.947100983  | 0.343587324 | 0.515472727 |
| ENSG00000065054 | 315.4523343 | 1.292979363  | 0.114742062 | 11.26857352  | 1.88E-29    | 9.98E-28    |
| ENSG00000065057 | 132.4881479 | 0.28905137   | 0.168891756 | 1.711459322  | 0.086996354 | 0.188353543 |
| ENSG00000065060 | 522.0819188 | -0.466681041 | 0.097023153 | -4.809996643 | 1.51E-06    | 1.29E-05    |
| ENSG00000065135 | 217.792421  | 0.219265879  | 0.132075295 | 1.660158165  | 0.096882638 | 0.204501687 |
| ENSG00000065150 | 1634.245399 | -0.255944707 | 0.087394616 | -2.928609556 | 0.003404818 | 0.012884559 |
| ENSG00000065154 | 212.8454146 | 0.030226283  | 0.128662653 | 0.234926624  | 0.814265685 | 0.890878579 |
| ENSG00000065183 | 653.8280332 | 0.377695024  | 0.089132372 | 4.237461814  | 2.26E-05    | 0.000150354 |
| ENSG00000065243 | 679.120782  | -0.117637288 | 0.086655867 | -1.357522488 | 0.174615253 | 0.319003831 |
| ENSG00000065268 | 309.3565329 | 0.16645404   | 0.112264289 | 1.482698034  | 0.138154657 | 0.268269072 |
| ENSG00000065308 | 468.6961381 | -0.022019615 | 0.092100283 | -0.239083028 | 0.811041202 | 0.888702196 |
| ENSG00000065328 | 445.8760464 | -0.10253096  | 0.094124068 | -1.08931714  | 0.276014057 | 0.444476608 |
| ENSG00000065357 | 104.5180204 | -0.422493733 | 0.17573942  | -2.404091997 | 0.016212693 | 0.048631779 |
| ENSG00000065361 | 42.24597241 | -1.512452185 | 0.295062607 | -5.125868717 | 2.96E-07    | 2.89E-06    |

|                 |             |              |             |              |             |             |
|-----------------|-------------|--------------|-------------|--------------|-------------|-------------|
| ENSG00000065413 | 14.45380806 | 0.873883384  | 0.465889962 | 1.875729154  | 0.06069248  | 0.14220972  |
| ENSG00000065427 | 719.0719655 | 0.382268583  | 0.08331598  | 4.588178448  | 4.47E-06    | 3.46E-05    |
| ENSG00000065457 | 156.6912424 | -0.072816157 | 0.147551088 | -0.493497934 | 0.621660799 | 0.754639706 |
| ENSG00000065485 | 234.8048489 | 0.631039714  | 0.128884372 | 4.896169356  | 9.77E-07    | 8.66E-06    |
| ENSG00000065491 | 138.8617631 | -0.014435247 | 0.156838528 | -0.09203891  | 0.926667125 | 0.959877081 |
| ENSG00000065518 | 578.3692933 | 0.147905738  | 0.085958263 | 1.72066923   | 0.085310863 | 0.185619841 |
| ENSG00000065526 | 2844.465213 | -0.015264463 | 0.059158076 | -0.258028391 | 0.796384996 | 0.878387645 |
| ENSG00000065534 | 34.21113174 | -1.591699334 | 0.322642598 | -4.933320475 | 8.08E-07    | 7.32E-06    |
| ENSG00000065548 | 1214.917654 | 0.230030979  | 0.072676768 | 3.165123949  | 0.001550169 | 0.006568695 |
| ENSG00000065559 | 199.8918951 | 0.119838159  | 0.131188181 | 0.913482891  | 0.360988628 | 0.532109326 |
| ENSG00000065600 | 160.656579  | 0.142680418  | 0.144321426 | 0.988629494  | 0.32284445  | 0.494547    |
| ENSG00000065613 | 1110.32937  | 0.322448491  | 0.071448921 | 4.512993173  | 6.39E-06    | 4.78E-05    |
| ENSG00000065615 | 73.59128286 | -0.195664693 | 0.209987174 | -0.931793544 | 0.351443231 | 0.523068772 |
| ENSG00000065621 | 35.22770653 | -2.265514925 | 0.347338117 | -6.522505915 | 6.91E-11    | 1.12E-09    |
| ENSG00000065665 | 62.9123764  | 0.006440035  | 0.231058481 | 0.027871883  | 0.977764334 | 0.988629033 |
| ENSG00000065717 | 125.1395551 | -1.319215974 | 0.171071852 | -7.711473013 | 1.24E-14    | 2.92E-13    |
| ENSG00000065802 | 266.2984837 | -0.063497778 | 0.126311267 | -0.502708738 | 0.615169065 | 0.74963078  |
| ENSG00000065809 | 93.28094206 | 0.029997305  | 0.198736651 | 0.150939975  | 0.880023066 | 0.934004754 |
| ENSG00000065833 | 147.7780858 | 0.597411051  | 0.154267544 | 3.872564729  | 0.000107696 | 0.000615979 |
| ENSG00000065882 | 412.5187774 | 0.167872254  | 0.096695964 | 1.736083359  | 0.082549096 | 0.180984416 |
| ENSG00000065883 | 729.6437424 | -0.053156187 | 0.079362072 | -0.669793343 | 0.502989538 | 0.660882428 |
| ENSG00000065911 | 678.3649024 | -0.599437813 | 0.083904019 | -7.144327738 | 9.04E-13    | 1.80E-11    |
| ENSG00000065923 | 163.6517237 | -1.830091249 | 0.160820324 | -11.37972618 | 5.28E-30    | 2.87E-28    |
| ENSG00000065970 | 366.7394643 | 0.146307601  | 0.104873274 | 1.395089476  | 0.162988859 | 0.30328508  |
| ENSG00000065978 | 3950.896223 | -0.848874451 | 0.060521303 | -14.02604378 | 1.08E-44    | 9.48E-43    |
| ENSG00000065989 | 548.2005234 | -0.498913436 | 0.092108509 | -5.416583535 | 6.07E-08    | 6.64E-07    |
| ENSG00000066027 | 256.5264885 | 0.217065429  | 0.118894922 | 1.825691338  | 0.067896769 | 0.15548515  |
| ENSG00000066044 | 854.9662029 | -0.104688371 | 0.080368545 | -1.302603778 | 0.192710067 | 0.343266335 |
| ENSG00000066084 | 494.1723007 | 0.078548517  | 0.090103812 | 0.871755759  | 0.383341635 | 0.552575821 |
| ENSG00000066117 | 637.4146605 | 0.104995153  | 0.083681785 | 1.254695421  | 0.209589349 | 0.364504343 |
| ENSG00000066135 | 354.9094086 | -0.236554823 | 0.111243415 | -2.12646135  | 0.033464864 | 0.088112642 |
| ENSG00000066136 | 469.3124566 | 0.230920252  | 0.094987356 | 2.431063055  | 0.015054594 | 0.045674274 |
| ENSG00000066230 | 94.00568166 | -3.130521875 | 0.250770138 | -12.48363101 | 9.17E-36    | 6.08E-34    |
| ENSG00000066248 | 31.49992703 | -1.198360424 | 0.328934705 | -3.643155942 | 0.000269316 | 0.001395454 |
| ENSG00000066279 | 2098.692272 | -0.154045676 | 0.06409192  | -2.403511636 | 0.01623845  | 0.048687622 |
| ENSG00000066322 | 255.0662374 | 0.506648837  | 0.11895677  | 4.25910047   | 2.05E-05    | 0.000137687 |
| ENSG00000066379 | 73.20312199 | 0.353318881  | 0.208117086 | 1.697692814  | 0.089565755 | 0.19261025  |
| ENSG00000066382 | 68.53692671 | -5.981018495 | 0.618137434 | -9.675871684 | 3.82E-22    | 1.44E-20    |
| ENSG00000066422 | 441.547766  | 0.050388685  | 0.096576045 | 0.521751385  | 0.601843442 | 0.739964537 |
| ENSG00000066427 | 183.0257404 | 0.062356086  | 0.13642195  | 0.457082501  | 0.647611748 | 0.773169561 |
| ENSG00000066455 | 309.1766324 | 0.361758306  | 0.11069215  | 3.268147805  | 0.001082538 | 0.00482064  |
| ENSG00000066557 | 111.1356951 | 0.062247893  | 0.167728603 | 0.371122707  | 0.710546139 | 0.818722141 |
| ENSG00000066583 | 113.1872013 | -0.293955236 | 0.172971307 | -1.699445078 | 0.089235355 | 0.192046733 |
| ENSG00000066629 | 195.6353262 | 0.010467224  | 0.130424317 | 0.080255156  | 0.936034324 | 0.964881635 |
| ENSG00000066651 | 226.3491001 | 0.032545175  | 0.122764546 | 0.265102392  | 0.790930584 | 0.875273298 |
| ENSG00000066654 | 340.4052037 | -0.10054975  | 0.103238059 | -0.973960102 | 0.33007635  | 0.502392728 |
| ENSG00000066697 | 284.5782181 | 0.459886902  | 0.115900074 | 3.967960389  | 7.25E-05    | 0.000430195 |
| ENSG00000066735 | 32.15985886 | 0.084492078  | 0.306444676 | 0.275717233  | 0.782765258 | 0.870139877 |
| ENSG00000066739 | 181.725811  | 0.067568625  | 0.142775564 | 0.473250623  | 0.636034385 | 0.765060371 |
| ENSG00000066777 | 620.4641134 | -0.049692679 | 0.085532578 | -0.580979556 | 0.561254232 | 0.707650857 |

|                 |             |              |             |              |             |             |
|-----------------|-------------|--------------|-------------|--------------|-------------|-------------|
| ENSG00000066827 | 139.3805972 | 0.388177307  | 0.156252033 | 2.484302439  | 0.012980551 | 0.040304554 |
| ENSG00000066855 | 178.2925032 | 0.265925828  | 0.145763255 | 1.824368063  | 0.068096447 | 0.155790031 |
| ENSG00000066926 | 199.2280592 | -0.081639503 | 0.136101785 | -0.599841536 | 0.548611849 | 0.696965781 |
| ENSG00000066933 | 706.019085  | -0.07741378  | 0.080246082 | -0.964704798 | 0.334692692 | 0.506346606 |
| ENSG00000067057 | 1260.433092 | 0.997099748  | 0.070010342 | 14.242178    | 5.01E-46    | 4.70E-44    |
| ENSG00000067064 | 1018.280288 | 0.095196324  | 0.081952964 | 1.161597085  | 0.245399167 | 0.408959793 |
| ENSG00000067066 | 80.16762293 | 8.082933832  | 1.033548258 | 7.820567416  | 5.26E-15    | 1.26E-13    |
| ENSG00000067082 | 197.2221349 | 0.548592     | 0.134106994 | 4.09070387   | 4.30E-05    | 0.000268614 |
| ENSG00000067113 | 60.77192761 | -0.040153196 | 0.225754177 | -0.177862472 | 0.858830984 | 0.919492083 |
| ENSG00000067141 | 452.5832617 | -0.184977867 | 0.094435675 | -1.958771054 | 0.050139605 | 0.122106628 |
| ENSG00000067167 | 464.2085011 | 0.089103334  | 0.09297904  | 0.958316348  | 0.337903263 | 0.509885824 |
| ENSG00000067177 | 377.3572788 | -0.104414302 | 0.110059545 | -0.948707374 | 0.342769463 | 0.514590639 |
| ENSG00000067182 | 327.6761936 | 0.041195696  | 0.109352657 | 0.376723322  | 0.706379229 | 0.815678152 |
| ENSG00000067191 | 73.66901686 | 0.15393281   | 0.209238717 | 0.73568034   | 0.461925257 | 0.624920929 |
| ENSG00000067208 | 315.4023705 | -0.221090478 | 0.109885658 | -2.012004865 | 0.044219424 | 0.11072197  |
| ENSG00000067221 | 22.11890221 | 0.357983803  | 0.370172615 | 0.967072628  | 0.333507728 | 0.505752246 |
| ENSG00000067225 | 7992.947106 | 0.389355421  | 0.062296217 | 6.250065283  | 4.10E-10    | 6.02E-09    |
| ENSG00000067248 | 375.4577284 | 0.155321418  | 0.105913921 | 1.466487281  | 0.142515584 | 0.27457364  |
| ENSG00000067334 | 508.8592159 | 0.34855656   | 0.100571299 | 3.465765724  | 0.000528724 | 0.002546103 |
| ENSG00000067365 | 126.7485073 | 0.124085655  | 0.161193707 | 0.769792179  | 0.44142318  | 0.60654127  |
| ENSG00000067369 | 815.3059563 | -0.291387708 | 0.081779306 | -3.563098312 | 0.000366503 | 0.001838669 |
| ENSG00000067533 | 443.0472808 | 0.253889371  | 0.09809642  | 2.588161423  | 0.009648975 | 0.031338533 |
| ENSG00000067560 | 1017.548936 | 0.261552792  | 0.078122959 | 3.347963215  | 0.000814078 | 0.003738266 |
| ENSG00000067596 | 424.36822   | -0.264513058 | 0.096163804 | -2.750650939 | 0.005947698 | 0.020700525 |
| ENSG00000067606 | 173.5675878 | 0.727686494  | 0.138686664 | 5.246982479  | 1.55E-07    | 1.58E-06    |
| ENSG00000067704 | 1378.217218 | 0.463472376  | 0.069025436 | 6.714515764  | 1.89E-11    | 3.23E-10    |
| ENSG00000067798 | 112.8380838 | -4.193741286 | 0.290388512 | -14.44182916 | 2.82E-47    | 2.73E-45    |
| ENSG00000067829 | 97.58431511 | 0.369963288  | 0.180206922 | 2.052991544  | 0.040073398 | 0.101958163 |
| ENSG00000067836 | 94.67735371 | 0.401975598  | 0.187045248 | 2.149082116  | 0.031627891 | 0.084016072 |
| ENSG00000067840 | 33.14301975 | -1.264589159 | 0.322665681 | -3.919193246 | 8.88E-05    | 0.00051742  |
| ENSG00000067900 | 1215.285625 | -0.205961402 | 0.068357648 | -3.012997203 | 0.002586813 | 0.010184126 |
| ENSG00000067955 | 502.2495508 | 0.167292938  | 0.092390124 | 1.810723181  | 0.070183713 | 0.159294007 |
| ENSG00000067992 | 210.5815039 | -0.29493113  | 0.128878205 | -2.288448458 | 0.022111418 | 0.062572074 |
| ENSG00000068001 | 317.075774  | 0.063940891  | 0.117973033 | 0.541995824  | 0.587821383 | 0.729570925 |
| ENSG00000068024 | 200.5712447 | -0.254005108 | 0.134059005 | -1.894726182 | 0.058128687 | 0.137186436 |
| ENSG00000068028 | 112.2448534 | 0.525562903  | 0.180068869 | 2.918677204  | 0.0035152   | 0.013252286 |
| ENSG00000068078 | 148.4171819 | 1.460192831  | 0.162337916 | 8.99477378   | 2.37E-19    | 7.75E-18    |
| ENSG00000068079 | 76.51622624 | -0.343067025 | 0.208521265 | -1.645237601 | 0.099920822 | 0.209615859 |
| ENSG00000068097 | 624.3010036 | 0.111082897  | 0.083983566 | 1.322674222  | 0.18594374  | 0.334008612 |
| ENSG00000068120 | 184.8302177 | -0.207985683 | 0.134622247 | -1.544957747 | 0.122356484 | 0.245710011 |
| ENSG00000068137 | 223.5650919 | 0.003391768  | 0.134134    | 0.025286414  | 0.97982651  | 0.989786143 |
| ENSG00000068305 | 519.9499195 | 0.067464092  | 0.089940448 | 0.750097354  | 0.453196073 | 0.617396281 |
| ENSG00000068308 | 390.4782759 | 0.050193886  | 0.100306239 | 0.500406423  | 0.616788931 | 0.750912994 |
| ENSG00000068323 | 391.5787065 | 0.224700471  | 0.106161601 | 2.116588941  | 0.03429475  | 0.089926889 |
| ENSG00000068354 | 106.4446647 | 0.528411763  | 0.171287985 | 3.084931869  | 0.002035988 | 0.00829212  |
| ENSG00000068366 | 497.1511053 | 0.097902511  | 0.091358019 | 1.071635656  | 0.283883712 | 0.453613298 |
| ENSG00000068383 | 204.9836381 | -0.38026142  | 0.132901759 | -2.861221879 | 0.004220116 | 0.015498387 |
| ENSG00000068394 | 150.5948072 | 0.470604901  | 0.151926453 | 3.097583689  | 0.001951053 | 0.008008896 |
| ENSG00000068400 | 392.2979769 | -0.136190757 | 0.115038306 | -1.183873112 | 0.236463295 | 0.397701138 |
| ENSG00000068438 | 250.6545403 | 0.54388357   | 0.127146934 | 4.277598772  | 1.89E-05    | 0.00012734  |



|                 |             |              |             |              |             |             |
|-----------------|-------------|--------------|-------------|--------------|-------------|-------------|
| ENSG00000068489 | 1002.44717  | 0.162504773  | 0.080475922 | 2.01929682   | 0.043456378 | 0.109318006 |
| ENSG00000068650 | 709.3698832 | 0.124513089  | 0.085114355 | 1.462891767  | 0.143496997 | 0.275859083 |
| ENSG00000068654 | 1063.131079 | 0.105717007  | 0.073080991 | 1.446573259  | 0.14801648  | 0.282191572 |
| ENSG00000068697 | 507.1012145 | -0.249542817 | 0.092320376 | -2.703009112 | 0.006871486 | 0.023428099 |
| ENSG00000068724 | 209.5058833 | -0.185637892 | 0.134616171 | -1.379016288 | 0.167889732 | 0.310105923 |
| ENSG00000068745 | 570.7212329 | -0.083608285 | 0.09626073  | -0.86856068  | 0.385087469 | 0.554120434 |
| ENSG00000068784 | 434.1073705 | -0.108548564 | 0.097764383 | -1.110307875 | 0.266866381 | 0.43356648  |
| ENSG00000068796 | 409.4296399 | -0.392357478 | 0.101268686 | -3.874420546 | 0.000106879 | 0.000612536 |
| ENSG00000068831 | 106.1392975 | -1.866632581 | 0.207235852 | -9.007285982 | 2.11E-19    | 6.95E-18    |
| ENSG00000068878 | 797.9466777 | 0.071876172  | 0.085661352 | 0.839073518  | 0.401428056 | 0.569754461 |
| ENSG00000068885 | 62.60507542 | -0.974532431 | 0.227754375 | -4.278874684 | 1.88E-05    | 0.000126673 |
| ENSG00000068903 | 182.9949479 | 0.386987536  | 0.137610982 | 2.81218498   | 0.00492062  | 0.017659669 |
| ENSG00000068912 | 368.7363681 | 0.075673142  | 0.106594741 | 0.709914405  | 0.477757217 | 0.638134946 |
| ENSG00000068971 | 55.31845796 | 0.076406785  | 0.23610842  | 0.323608895  | 0.746234153 | 0.845214574 |
| ENSG00000068976 | 153.4631871 | -2.619491323 | 0.180006828 | -14.55217756 | 5.66E-48    | 5.72E-46    |
| ENSG00000069011 | 429.2311506 | 0.349041929  | 0.10540737  | 3.31136172   | 0.000928431 | 0.004209707 |
| ENSG00000069020 | 10.33314668 | -5.666572511 | 1.256066565 | -4.511363227 | 6.44E-06    | 4.81E-05    |
| ENSG00000069188 | 169.4767025 | -2.670924213 | 0.177937819 | -15.01043579 | 6.27E-51    | 6.78E-49    |
| ENSG00000069248 | 435.9427419 | -0.24190295  | 0.10415256  | -2.322582857 | 0.020201573 | 0.058257337 |
| ENSG00000069275 | 4120.006085 | -0.565787585 | 0.05647878  | -10.01770195 | 1.27E-23    | 5.22E-22    |
| ENSG00000069329 | 425.1835861 | 0.076295157  | 0.095077542 | 0.802451932  | 0.422291583 | 0.589889605 |
| ENSG00000069345 | 536.7973634 | -0.003449829 | 0.093133834 | -0.037041626 | 0.970451816 | 0.984539698 |
| ENSG00000069399 | 92.27016348 | -0.156973562 | 0.186737894 | -0.840609037 | 0.400566994 | 0.568747917 |
| ENSG00000069424 | 124.757538  | -0.4207116   | 0.168153456 | -2.501950357 | 0.012351124 | 0.038623384 |
| ENSG00000069493 | 25.19832479 | -0.956230588 | 0.364287224 | -2.624935834 | 0.00866653  | 0.028617476 |
| ENSG00000069509 | 78.99547723 | 0.064606066  | 0.200013079 | 0.323009209  | 0.746688268 | 0.845576459 |
| ENSG00000069696 | 12.84802453 | -0.489087635 | 0.484599561 | -1.009261408 | 0.312849283 | 0.484076461 |
| ENSG00000069702 | 25.12130346 | 0.876812101  | 0.352414251 | 2.488015452  | 0.012845815 | 0.039921497 |
| ENSG00000069849 | 347.5998857 | 0.03898315   | 0.103413438 | 0.376964069  | 0.706200308 | 0.815661201 |
| ENSG00000069869 | 350.5559413 | 0.02514087   | 0.103816804 | 0.242165707  | 0.808651766 | 0.886947088 |
| ENSG00000069943 | 60.28500992 | 0.006082053  | 0.237646212 | 0.02559289   | 0.979582057 | 0.989728056 |
| ENSG00000069956 | 409.6816264 | -0.118062642 | 0.105041105 | -1.123966109 | 0.261027404 | 0.427271747 |
| ENSG00000069966 | 65.09863959 | -0.377284994 | 0.233033304 | -1.619017484 | 0.105443501 | 0.218501439 |
| ENSG00000069974 | 59.97077541 | -0.18693551  | 0.228029829 | -0.819785333 | 0.412338494 | 0.580607352 |
| ENSG00000069998 | 301.628096  | 0.118067874  | 0.123317937 | 0.957426609  | 0.338351973 | 0.51028883  |
| ENSG00000070010 | 441.4281623 | 0.540924004  | 0.107096565 | 5.050806267  | 4.40E-07    | 4.19E-06    |
| ENSG00000070018 | 722.4506878 | -0.20745675  | 0.079289208 | -2.616456325 | 0.008884773 | 0.029214515 |
| ENSG00000070047 | 814.5490999 | 0.313488304  | 0.08460474  | 3.705327914  | 0.000211117 | 0.001124172 |
| ENSG00000070061 | 410.5029135 | 0.347499001  | 0.097228993 | 3.574026539  | 0.000351533 | 0.001769888 |
| ENSG00000070081 | 456.6123932 | 0.076153347  | 0.093280799 | 0.816388234  | 0.414278124 | 0.582467547 |
| ENSG00000070087 | 644.8681519 | 0.159038624  | 0.088034002 | 1.806559061  | 0.070831058 | 0.160500295 |
| ENSG00000070159 | 22.86553563 | 1.622133366  | 0.387497195 | 4.186180927  | 2.84E-05    | 0.000184403 |
| ENSG00000070193 | 7.191538272 | -5.136924214 | 1.29071879  | -3.979894191 | 6.89E-05    | 0.000412121 |
| ENSG00000070214 | 1196.796337 | -1.496492762 | 0.073793508 | -20.27946355 | 1.95E-91    | 4.42E-89    |
| ENSG00000070269 | 93.23070166 | -0.348133643 | 0.190211838 | -1.830241728 | 0.067213801 | 0.154147307 |
| ENSG00000070366 | 423.0360506 | -0.354699743 | 0.108552263 | -3.267548133 | 0.001084834 | 0.004826945 |
| ENSG00000070367 | 452.8594801 | -0.066449112 | 0.096789552 | -0.68653187  | 0.492377774 | 0.651755616 |
| ENSG00000070371 | 53.8558628  | -0.22135041  | 0.242321776 | -0.913456536 | 0.361002483 | 0.532109326 |
| ENSG00000070404 | 43.39795926 | -0.36657952  | 0.270229619 | -1.356548259 | 0.174924792 | 0.319373027 |
| ENSG00000070413 | 305.2071212 | -0.28525967  | 0.109446859 | -2.606376035 | 0.009150594 | 0.029941392 |

|                 |             |              |             |              |             |             |
|-----------------|-------------|--------------|-------------|--------------|-------------|-------------|
| ENSG00000070423 | 450.8036325 | 0.261258338  | 0.101438802 | 2.575526663  | 0.010008756 | 0.032297953 |
| ENSG00000070444 | 615.7734955 | 0.079502497  | 0.086633743 | 0.917685124  | 0.358783738 | 0.530006853 |
| ENSG00000070476 | 313.9418196 | -0.050165949 | 0.108989541 | -0.460282226 | 0.645313657 | 0.771662632 |
| ENSG00000070495 | 296.547748  | 0.356789692  | 0.112835574 | 3.162031955  | 0.001566724 | 0.00662685  |
| ENSG00000070501 | 43.81290231 | 0.433607254  | 0.270255929 | 1.604431975  | 0.108618868 | 0.223719829 |
| ENSG00000070540 | 104.1237608 | -0.000917872 | 0.175489889 | -0.005230343 | 0.995826809 | 0.998100549 |
| ENSG00000070610 | 224.3096159 | -0.293160494 | 0.13364013  | -2.193656167 | 0.028260137 | 0.076738865 |
| ENSG00000070614 | 553.9946443 | -0.300497335 | 0.090366462 | -3.325319256 | 0.000883173 | 0.004021373 |
| ENSG00000070669 | 42.96121192 | -0.891098223 | 0.285458543 | -3.12163796  | 0.00179848  | 0.007461088 |
| ENSG00000070718 | 77.71248238 | -0.105618442 | 0.19948676  | -0.529450888 | 0.596492705 | 0.73589786  |
| ENSG00000070756 | 17137.16041 | 0.117114722  | 0.0604506   | 1.937362421  | 0.052701057 | 0.127074009 |
| ENSG00000070759 | 26.4288314  | -0.729078504 | 0.346186577 | -2.10602765  | 0.035201951 | 0.091842831 |
| ENSG00000070761 | 444.1523034 | -0.001456699 | 0.095126216 | -0.015313325 | 0.987782212 | 0.99372461  |
| ENSG00000070770 | 553.816745  | -0.047832293 | 0.089991098 | -0.531522501 | 0.595056753 | 0.734903558 |
| ENSG00000070778 | 152.4827861 | -2.1856448   | 0.180643977 | -12.09918445 | 1.07E-33    | 6.60E-32    |
| ENSG00000070785 | 201.3555548 | 0.17180821   | 0.136580514 | 1.257926221  | 0.20841844  | 0.362827342 |
| ENSG00000070814 | 2025.680799 | 0.184867898  | 0.065584654 | 2.818767586  | 0.004820841 | 0.017350334 |
| ENSG00000070831 | 100.8269571 | 0.158019109  | 0.18055895  | 0.875166307  | 0.381483423 | 0.550886667 |
| ENSG00000070882 | 205.9132252 | -0.124279801 | 0.131955059 | -0.941834302 | 0.34627748  | 0.518180437 |
| ENSG00000070886 | 81.40738376 | 0.35227953   | 0.194275789 | 1.813296098  | 0.069786165 | 0.15867872  |
| ENSG00000070950 | 249.3077073 | 0.02312796   | 0.117367365 | 0.197056139  | 0.843783606 | 0.909432081 |
| ENSG00000070961 | 262.5321153 | -1.220387813 | 0.1219288   | -10.00902009 | 1.39E-23    | 5.66E-22    |
| ENSG00000071051 | 230.707288  | -0.392515312 | 0.12405956  | -3.163926358 | 0.001556562 | 0.006591807 |
| ENSG00000071054 | 715.0753053 | -0.402437574 | 0.083850641 | -4.799457357 | 1.59E-06    | 1.35E-05    |
| ENSG00000071073 | 11.91060311 | 0.122422279  | 0.526397087 | 0.232566407  | 0.816098115 | 0.891910855 |
| ENSG00000071082 | 11687.62023 | 0.379645057  | 0.056323834 | 6.740397927  | 1.58E-11    | 2.73E-10    |
| ENSG00000071127 | 2189.553558 | 0.059592402  | 0.05973752  | 0.99757074   | 0.318487555 | 0.490117735 |
| ENSG00000071189 | 393.5628042 | 0.142886115  | 0.102409506 | 1.3952427    | 0.162942665 | 0.303277645 |
| ENSG00000071205 | 224.3362933 | 0.065052337  | 0.126322143 | 0.514971764  | 0.606572751 | 0.743501522 |
| ENSG00000071242 | 63.65603884 | -1.113433472 | 0.252526452 | -4.409175603 | 1.04E-05    | 7.41E-05    |
| ENSG00000071243 | 119.3397083 | -0.602263411 | 0.180176619 | -3.342627993 | 0.000829891 | 0.003804659 |
| ENSG00000071246 | 321.2456052 | 0.015075435  | 0.1162049   | 0.129731495  | 0.896778863 | 0.944094484 |
| ENSG00000071282 | 28.560712   | -0.845418393 | 0.342532517 | -2.46814054  | 0.013581698 | 0.041810677 |
| ENSG00000071462 | 1110.491864 | 0.773807337  | 0.075063813 | 10.30866012  | 6.44E-25    | 2.85E-23    |
| ENSG00000071537 | 397.6116448 | -0.024127513 | 0.103178384 | -0.233842711 | 0.81510709  | 0.891521397 |
| ENSG00000071539 | 340.3183637 | 0.2647414    | 0.114307567 | 2.316044398  | 0.020555845 | 0.059126532 |
| ENSG00000071553 | 897.8161101 | 0.497928021  | 0.077069104 | 6.460799381  | 1.04E-10    | 1.64E-09    |
| ENSG00000071564 | 1070.963863 | 0.329755939  | 0.078865487 | 4.181245228  | 2.90E-05    | 0.000188018 |
| ENSG00000071575 | 210.3385976 | 6.20964948   | 0.350224679 | 17.73047377  | 2.44E-70    | 3.98E-68    |
| ENSG00000071626 | 1306.551348 | 0.310786841  | 0.074271809 | 4.184452308  | 2.86E-05    | 0.000185554 |
| ENSG00000071655 | 332.2528684 | 0.14866937   | 0.118596625 | 1.253571674  | 0.209997732 | 0.365122354 |
| ENSG00000071794 | 1000.753539 | -0.086840778 | 0.071800396 | -1.209474918 | 0.226480442 | 0.384874276 |
| ENSG00000071859 | 483.0671984 | 0.107894027  | 0.106957039 | 1.008760415  | 0.31308955  | 0.484283494 |
| ENSG00000071889 | 161.0525671 | 0.006726949  | 0.158755159 | 0.042373107  | 0.966201267 | 0.982498132 |
| ENSG00000071894 | 1153.213413 | 0.306230543  | 0.071944533 | 4.256481093  | 2.08E-05    | 0.000139176 |
| ENSG00000071967 | 332.5964754 | 0.255024601  | 0.11078614  | 2.301954039  | 0.021337764 | 0.060883927 |
| ENSG00000071994 | 498.115839  | 0.31197008   | 0.098034173 | 3.18225848   | 0.001461313 | 0.006254439 |
| ENSG00000072041 | 298.3050225 | 0.566336896  | 0.109979268 | 5.149487762  | 2.61E-07    | 2.58E-06    |
| ENSG00000072042 | 929.0523792 | 0.039313245  | 0.082005209 | 0.479399365  | 0.631654545 | 0.761618146 |
| ENSG00000072062 | 962.6774889 | -0.131060086 | 0.080866209 | -1.620702736 | 0.105081407 | 0.218032278 |

|                 |             |              |             |              |             |             |
|-----------------|-------------|--------------|-------------|--------------|-------------|-------------|
| ENSG00000072071 | 2282.889635 | -0.043025536 | 0.069679068 | -0.617481512 | 0.536917172 | 0.687643647 |
| ENSG00000072110 | 1101.771002 | 0.031028419  | 0.070012395 | 0.443184654  | 0.657632178 | 0.780564116 |
| ENSG00000072121 | 341.8067069 | 0.034823613  | 0.103597904 | 0.336142064  | 0.736763739 | 0.838085161 |
| ENSG00000072133 | 39.69264905 | -1.656998153 | 0.305108089 | -5.430856186 | 5.61E-08    | 6.16E-07    |
| ENSG00000072134 | 319.3991366 | -0.084831551 | 0.112699045 | -0.752726441 | 0.451614317 | 0.616629899 |
| ENSG00000072135 | 346.6519038 | 0.273362769  | 0.102571944 | 2.665083231  | 0.007696927 | 0.025886468 |
| ENSG00000072163 | 12.38938787 | -0.630964542 | 0.498730125 | -1.265142228 | 0.205820348 | 0.359373328 |
| ENSG00000072195 | 63.29992916 | -0.541500611 | 0.226228893 | -2.393596164 | 0.016684107 | 0.049807584 |
| ENSG00000072210 | 320.706368  | -0.178004223 | 0.108837461 | -1.635505094 | 0.101943208 | 0.212872936 |
| ENSG00000072274 | 761.565734  | 0.013081878  | 0.085690781 | 0.152663768  | 0.878663435 | 0.933347343 |
| ENSG00000072310 | 1382.740357 | 0.303356259  | 0.079497076 | 3.815942368  | 0.000135664 | 0.000758595 |
| ENSG00000072364 | 1813.151633 | -0.00764623  | 0.064280934 | -0.118950197 | 0.905314812 | 0.94931003  |
| ENSG00000072401 | 101.6769633 | -0.018356663 | 0.179602232 | -0.102207319 | 0.918592118 | 0.955355281 |
| ENSG00000072415 | 283.0866043 | -0.079346316 | 0.118905784 | -0.667304086 | 0.504577917 | 0.662287983 |
| ENSG00000072422 | 183.7529929 | -1.195607472 | 0.147728424 | -8.093279826 | 5.81E-16    | 1.51E-14    |
| ENSG00000072501 | 4170.417183 | 0.017757429  | 0.053803853 | 0.330040101  | 0.741369662 | 0.842008184 |
| ENSG00000072506 | 320.7457672 | 0.739028591  | 0.11553066  | 6.396817868  | 1.59E-10    | 2.44E-09    |
| ENSG00000072518 | 535.9668316 | 0.062713333  | 0.092412173 | 0.67862632   | 0.497374662 | 0.655493567 |
| ENSG00000072571 | 552.1619043 | -0.400813285 | 0.090635331 | -4.422263176 | 9.77E-06    | 7.02E-05    |
| ENSG00000072609 | 80.99891647 | 0.007122474  | 0.19802645  | 0.035967289  | 0.971308442 | 0.985053042 |
| ENSG00000072657 | 12.38465636 | -4.027776654 | 0.822478637 | -4.897120089 | 9.73E-07    | 8.63E-06    |
| ENSG00000072682 | 439.9000936 | 0.612754144  | 0.105134054 | 5.828312705  | 5.60E-09    | 7.12E-08    |
| ENSG00000072736 | 499.8162848 | -0.050431525 | 0.093065527 | -0.541892651 | 0.587892459 | 0.729572441 |
| ENSG00000072756 | 130.5437323 | -0.199048835 | 0.159280943 | -1.249671374 | 0.211419619 | 0.366375183 |
| ENSG00000072778 | 491.2706704 | 0.292582652  | 0.094494688 | 3.096286776  | 0.001959607 | 0.008034619 |
| ENSG00000072786 | 355.7817059 | 0.24116006   | 0.101535901 | 2.375121096  | 0.017543194 | 0.051924981 |
| ENSG00000072803 | 408.2058422 | -0.015600347 | 0.109558153 | -0.142393302 | 0.886769353 | 0.938065731 |
| ENSG00000072818 | 9.595767673 | -0.161649539 | 0.577912926 | -0.279712621 | 0.779697994 | 0.868262525 |
| ENSG00000072840 | 771.3061324 | 0.062932562  | 0.082878199 | 0.759337956  | 0.447650418 | 0.612760224 |
| ENSG00000072849 | 142.3023741 | -0.085451719 | 0.160732273 | -0.531640082 | 0.594975298 | 0.734903558 |
| ENSG00000072864 | 302.6433511 | -0.205744964 | 0.108445042 | -1.897227941 | 0.057797861 | 0.136497402 |
| ENSG00000072954 | 107.3751798 | -0.602432615 | 0.179534239 | -3.355530502 | 0.000792129 | 0.003644133 |
| ENSG00000072958 | 383.5786737 | 0.166023308  | 0.108984484 | 1.523366455  | 0.12766705  | 0.25299064  |
| ENSG00000073008 | 727.3086747 | 0.235092992  | 0.083369282 | 2.81989943   | 0.00480387  | 0.01729812  |
| ENSG00000073050 | 379.8991353 | 0.079290254  | 0.111157745 | 0.713312907  | 0.475652152 | 0.636590614 |
| ENSG00000073060 | 3002.972274 | 0.884089518  | 0.060784391 | 14.54468     | 6.31E-48    | 6.33E-46    |
| ENSG00000073111 | 1123.067287 | -0.048851827 | 0.073425591 | -0.665324258 | 0.505843118 | 0.663390746 |
| ENSG00000073150 | 18.74363352 | 0.992818184  | 0.405695539 | 2.447200152  | 0.014397086 | 0.043935666 |
| ENSG00000073169 | 205.0757986 | -0.005034735 | 0.142312101 | -0.035378122 | 0.97177823  | 0.985302874 |
| ENSG00000073331 | 35.39731817 | -1.074456582 | 0.307442747 | -3.494818438 | 0.000474384 | 0.002311369 |
| ENSG00000073350 | 150.5986722 | -0.562272087 | 0.149550382 | -3.759750259 | 0.000170083 | 0.000924954 |
| ENSG00000073417 | 539.4089132 | -0.151278078 | 0.096384511 | -1.569526858 | 0.116525226 | 0.235990463 |
| ENSG00000073464 | 61.64807758 | 2.929276003  | 0.286117238 | 10.23802699  | 1.34E-24    | 5.77E-23    |
| ENSG00000073536 | 204.7310327 | 0.255145554  | 0.139892898 | 1.823863525  | 0.068172707 | 0.155862959 |
| ENSG00000073578 | 105.7166091 | 0.091102621  | 0.172491851 | 0.528156087  | 0.597391005 | 0.736682596 |
| ENSG00000073584 | 106.0522449 | -0.503533107 | 0.175928481 | -2.862146616 | 0.004207822 | 0.01546906  |
| ENSG00000073605 | 43.18799994 | 0.350876817  | 0.292955736 | 1.197712738  | 0.231028869 | 0.390477983 |
| ENSG00000073614 | 262.8859014 | -0.213727889 | 0.11948136  | -1.788796927 | 0.073647526 | 0.165154342 |
| ENSG00000073670 | 221.0067525 | 0.325877453  | 0.125568192 | 2.595222939  | 0.009452958 | 0.030765918 |
| ENSG00000073711 | 187.4276517 | -0.285164075 | 0.13555525  | -2.103674151 | 0.035406881 | 0.092274667 |

|                 |             |              |             |              |             |             |
|-----------------|-------------|--------------|-------------|--------------|-------------|-------------|
| ENSG00000073712 | 408.8733431 | -0.011771407 | 0.103880333 | -0.113316997 | 0.909779242 | 0.951381168 |
| ENSG00000073756 | 23.81289941 | -0.866858064 | 0.364781542 | -2.376375899 | 0.017483642 | 0.051812809 |
| ENSG00000073792 | 762.5853629 | -0.322919565 | 0.082367044 | -3.920494793 | 8.84E-05    | 0.000515274 |
| ENSG00000073803 | 10.19023986 | -0.673347972 | 0.569822506 | -1.181680199 | 0.237332618 | 0.398733559 |
| ENSG00000073849 | 58.81343109 | 0.016755977  | 0.228874604 | 0.073210294  | 0.941638775 | 0.96767868  |
| ENSG00000073910 | 69.19855858 | -2.263584084 | 0.258214698 | -8.766286734 | 1.85E-18    | 5.78E-17    |
| ENSG00000073921 | 754.2940011 | 0.059479417  | 0.08124405  | 0.732107977  | 0.464102665 | 0.627026563 |
| ENSG00000073969 | 102.8225822 | 0.191510196  | 0.184775874 | 1.036445896  | 0.299994168 | 0.470406446 |
| ENSG00000074047 | 693.1202785 | 0.071628503  | 0.091654757 | 0.78150339   | 0.434506484 | 0.600798561 |
| ENSG00000074054 | 700.1738738 | -0.110280186 | 0.081844271 | -1.347439289 | 0.177838794 | 0.323295139 |
| ENSG00000074071 | 1290.390365 | 0.317817868  | 0.070778552 | 4.490313191  | 7.11E-06    | 5.27E-05    |
| ENSG00000074181 | 922.575806  | 0.241902303  | 0.097850758 | 2.472155642  | 0.013430103 | 0.041441742 |
| ENSG00000074201 | 820.1087377 | 0.241155527  | 0.082953787 | 2.907106914  | 0.003647885 | 0.013664491 |
| ENSG00000074211 | 159.2528639 | -0.338817958 | 0.148119477 | -2.287463907 | 0.02216876  | 0.062662318 |
| ENSG00000074219 | 596.1782385 | -0.204617089 | 0.087750933 | -2.331793892 | 0.019711537 | 0.057102073 |
| ENSG00000074266 | 140.3253338 | 0.107824423  | 0.162566426 | 0.663263784  | 0.507161627 | 0.66425169  |
| ENSG00000074317 | 67.34066547 | -0.089976539 | 0.213373305 | -0.421686016 | 0.673254213 | 0.791795205 |
| ENSG00000074319 | 201.1361731 | 0.178809023  | 0.134482128 | 1.32961179   | 0.183646212 | 0.330989821 |
| ENSG00000074356 | 639.0604546 | -0.076006301 | 0.085346169 | -0.890564881 | 0.373162647 | 0.54340148  |
| ENSG00000074370 | 39.80481623 | 0.871968603  | 0.289586261 | 3.01108416   | 0.002603167 | 0.010231305 |
| ENSG00000074410 | 644.699462  | 0.445003683  | 0.089534063 | 4.970216576  | 6.69E-07    | 6.16E-06    |
| ENSG00000074582 | 186.5962952 | 0.636410522  | 0.143290012 | 4.441415805  | 8.94E-06    | 6.47E-05    |
| ENSG00000074603 | 328.1408102 | -0.29642084  | 0.110660101 | -2.678660493 | 0.00739173  | 0.024973678 |
| ENSG00000074621 | 94.95718014 | -0.367219716 | 0.188172883 | -1.951501778 | 0.050997385 | 0.123702343 |
| ENSG00000074657 | 380.8177993 | 0.029866522  | 0.103305138 | 0.289109748  | 0.772497394 | 0.863610895 |
| ENSG00000074660 | 8.993035369 | 0.762094815  | 0.577670342 | 1.319255568  | 0.187083687 | 0.335389465 |
| ENSG00000074695 | 2067.98913  | -0.215115594 | 0.064768395 | -3.32130499  | 0.000895976 | 0.004077023 |
| ENSG00000074696 | 1162.423093 | 0.005520157  | 0.07153662  | 0.077165465  | 0.938491915 | 0.966102042 |
| ENSG00000074755 | 494.3171779 | 0.04020899   | 0.093074965 | 0.432006502  | 0.665736688 | 0.786165328 |
| ENSG00000074800 | 5368.654847 | 0.346237155  | 0.05803767  | 5.965731515  | 2.44E-09    | 3.23E-08    |
| ENSG00000074842 | 1502.252965 | 1.003745358  | 0.066053469 | 15.1959522   | 3.76E-52    | 4.30E-50    |
| ENSG00000074855 | 190.3318478 | -0.254476326 | 0.139568111 | -1.823312816 | 0.068256026 | 0.156002669 |
| ENSG00000074935 | 141.2677901 | -0.551576196 | 0.158154597 | -3.487576132 | 0.00048742  | 0.002366675 |
| ENSG00000074964 | 46.88222392 | 0.573312215  | 0.254392823 | 2.253649329  | 0.024218237 | 0.067498726 |
| ENSG00000075043 | 430.7240686 | 0.484432699  | 0.095584147 | 5.068128103  | 4.02E-07    | 3.86E-06    |
| ENSG00000075089 | 263.6677303 | 0.588438682  | 0.133821237 | 4.397199548  | 1.10E-05    | 7.80E-05    |
| ENSG00000075131 | 168.7872722 | 0.118356599  | 0.143410833 | 0.825297481  | 0.409202721 | 0.577637398 |
| ENSG00000075142 | 162.7815299 | 0.495744655  | 0.14478698  | 3.423958803  | 0.00061716  | 0.002922874 |
| ENSG00000075151 | 1247.001372 | 0.108697485  | 0.074861508 | 1.451980975  | 0.146506895 | 0.280143847 |
| ENSG00000075188 | 55.36357258 | 0.189860611  | 0.234427801 | 0.809889487  | 0.418003695 | 0.58598722  |
| ENSG00000075213 | 58.67968505 | -8.186816235 | 1.194278461 | -6.855031305 | 7.13E-12    | 1.27E-10    |
| ENSG00000075218 | 404.31921   | 0.064983841  | 0.098054074 | 0.662734739  | 0.507500457 | 0.664432322 |
| ENSG00000075223 | 50.27791956 | -1.08248164  | 0.276431291 | -3.91591573  | 9.01E-05    | 0.000523633 |
| ENSG00000075234 | 220.9309423 | -0.061737136 | 0.126684057 | -0.487331541 | 0.626023399 | 0.757363766 |
| ENSG00000075239 | 493.5540439 | -0.301620951 | 0.093038868 | -3.241881145 | 0.001187435 | 0.005210842 |
| ENSG00000075240 | 214.2815625 | 0.017692597  | 0.127748952 | 0.138495046  | 0.889849184 | 0.939631412 |
| ENSG00000075275 | 808.1497327 | -0.04429487  | 0.090369185 | -0.490154584 | 0.624024515 | 0.755922074 |
| ENSG00000075292 | 1346.038263 | -0.153847881 | 0.072887065 | -2.110770709 | 0.034792025 | 0.090993032 |
| ENSG00000075303 | 101.3860419 | -0.218126431 | 0.192723062 | -1.131812812 | 0.25771314  | 0.423403097 |
| ENSG00000075336 | 299.7960742 | 0.245759669  | 0.115119311 | 2.134825741  | 0.032775247 | 0.086572751 |

|                 |             |              |             |              |             |             |
|-----------------|-------------|--------------|-------------|--------------|-------------|-------------|
| ENSG00000075340 | 302.3433146 | 0.073070669  | 0.116537311 | 0.627015232  | 0.530649251 | 0.682791062 |
| ENSG00000075391 | 476.589983  | -0.19871264  | 0.096988715 | -2.048822275 | 0.040479497 | 0.102823778 |
| ENSG00000075399 | 69.54528156 | 1.133512637  | 0.222851948 | 5.086393227  | 3.65E-07    | 3.52E-06    |
| ENSG00000075407 | 1050.363896 | 0.212049992  | 0.070563781 | 3.005082639  | 0.002655087 | 0.010409839 |
| ENSG00000075413 | 763.3446449 | 0.027484714  | 0.080844244 | 0.339971187  | 0.733878226 | 0.836005299 |
| ENSG00000075415 | 1662.518875 | -0.09541216  | 0.073607304 | -1.296232234 | 0.194895487 | 0.346105804 |
| ENSG00000075420 | 590.8843412 | 0.053879357  | 0.092892292 | 0.580019669  | 0.561901354 | 0.708212501 |
| ENSG00000075426 | 165.5218126 | 0.709794197  | 0.143465925 | 4.947475842  | 7.52E-07    | 6.84E-06    |
| ENSG00000075539 | 563.2595593 | -0.206614835 | 0.092315262 | -2.23814383  | 0.025211677 | 0.069769194 |
| ENSG00000075568 | 805.5341052 | -0.010070666 | 0.077809188 | -0.129427727 | 0.89701921  | 0.944134611 |
| ENSG00000075618 | 574.015935  | -0.234891453 | 0.093600806 | -2.509502449 | 0.012090138 | 0.037900059 |
| ENSG00000075624 | 10280.26189 | -0.130846478 | 0.061745395 | -2.119129342 | 0.034079538 | 0.089496217 |
| ENSG00000075643 | 133.1585485 | -0.12477026  | 0.159988452 | -0.779870409 | 0.435467158 | 0.60165311  |
| ENSG00000075651 | 32.60142387 | -0.117103235 | 0.314714541 | -0.372093498 | 0.709823237 | 0.818224767 |
| ENSG00000075702 | 216.3527724 | -0.063287521 | 0.136040526 | -0.465210793 | 0.64178051  | 0.768812112 |
| ENSG00000075711 | 1162.924776 | 0.019255332  | 0.075950552 | 0.253524575  | 0.799862873 | 0.880907053 |
| ENSG00000075785 | 1941.470703 | 0.166482477  | 0.083510346 | 1.993555117  | 0.046200695 | 0.114580006 |
| ENSG00000075790 | 8.976598053 | 0.871597574  | 0.615376539 | 1.416364647  | 0.156668769 | 0.294450923 |
| ENSG00000075826 | 74.07375248 | 0.155214277  | 0.203543964 | 0.762558977  | 0.445726458 | 0.610751217 |
| ENSG00000075856 | 992.6713268 | 0.087389543  | 0.076022387 | 1.149523799  | 0.250340059 | 0.414440402 |
| ENSG00000075884 | 28.77959898 | -1.35607326  | 0.341210622 | -3.974299657 | 7.06E-05    | 0.000420318 |
| ENSG00000075914 | 281.0186327 | 0.23658969   | 0.112357899 | 2.10567919   | 0.035232229 | 0.091904757 |
| ENSG00000075945 | 94.74641776 | -0.573063708 | 0.184968913 | -3.098162279 | 0.001947248 | 0.007995612 |
| ENSG00000075975 | 300.8633417 | 0.47045546   | 0.115981005 | 4.056314742  | 4.99E-05    | 0.000307278 |
| ENSG00000076003 | 947.0974972 | 0.112108829  | 0.077897368 | 1.439186352  | 0.150097731 | 0.285230361 |
| ENSG00000076043 | 120.5551107 | 0.420728395  | 0.164228312 | 2.561850578  | 0.01041161  | 0.033390842 |
| ENSG00000076053 | 85.78159746 | -0.131373288 | 0.189645177 | -0.692732026 | 0.488477737 | 0.648303739 |
| ENSG00000076067 | 279.2839027 | -0.23400053  | 0.115485957 | -2.026224974 | 0.042741735 | 0.10788736  |
| ENSG00000076108 | 2702.346249 | 0.010572422  | 0.062269261 | 0.169785565  | 0.86517878  | 0.924195157 |
| ENSG00000076201 | 1025.000503 | 0.373634993  | 0.080741512 | 4.627545183  | 3.70E-06    | 2.92E-05    |
| ENSG00000076248 | 430.3679746 | -0.229732326 | 0.096043896 | -2.391951348 | 0.016759064 | 0.049992476 |
| ENSG00000076321 | 119.5116931 | -0.02536764  | 0.169329694 | -0.149812119 | 0.880912848 | 0.934253325 |
| ENSG00000076351 | 143.8073081 | 0.1821791    | 0.149859851 | 1.215663162  | 0.224113263 | 0.382378113 |
| ENSG00000076382 | 732.0819173 | -0.055249871 | 0.080314403 | -0.687919834 | 0.491503266 | 0.651150276 |
| ENSG00000076513 | 147.7844414 | -0.656441688 | 0.149988667 | -4.376608601 | 1.21E-05    | 8.49E-05    |
| ENSG00000076554 | 190.371307  | 0.29294205   | 0.13323466  | 2.198692523  | 0.027899793 | 0.075951239 |
| ENSG00000076555 | 277.1851703 | -0.442241191 | 0.114801907 | -3.852211185 | 0.000117056 | 0.000664895 |
| ENSG00000076604 | 180.8169144 | 0.11408908   | 0.137179221 | 0.831679021  | 0.405590145 | 0.573801237 |
| ENSG00000076641 | 38.91152076 | -0.036955287 | 0.279632103 | -0.13215681  | 0.894860262 | 0.943064154 |
| ENSG00000076650 | 114.4864231 | 0.127593802  | 0.170147114 | 0.749902829  | 0.453313231 | 0.617396281 |
| ENSG00000076662 | 39.27167865 | -0.296441814 | 0.284811641 | -1.040834613 | 0.297952313 | 0.468661042 |
| ENSG00000076685 | 423.0753387 | 0.191110897  | 0.094899063 | 2.013833341  | 0.044027034 | 0.110437097 |
| ENSG00000076706 | 12.12966137 | -0.487033742 | 0.55223029  | -0.881939565 | 0.37780949  | 0.547235502 |
| ENSG00000076716 | 47.8347298  | -1.226714534 | 0.265067453 | -4.627933464 | 3.69E-06    | 2.91E-05    |
| ENSG00000076770 | 109.8797338 | 0.415746111  | 0.17473255  | 2.379328362  | 0.017344218 | 0.051443039 |
| ENSG00000076826 | 27.45175861 | -0.139384102 | 0.335942624 | -0.414904487 | 0.678211825 | 0.795757928 |
| ENSG00000076864 | 27.58613402 | -0.862855665 | 0.341307944 | -2.528085505 | 0.011468642 | 0.036251127 |
| ENSG00000076924 | 348.830281  | 0.428784228  | 0.103967083 | 4.124230646  | 3.72E-05    | 0.000235685 |
| ENSG00000076928 | 293.6485681 | 0.08350071   | 0.120914378 | 0.690577183  | 0.489831291 | 0.649486515 |
| ENSG00000076944 | 11.92160944 | -1.056171252 | 0.551246706 | -1.915968369 | 0.055369122 | 0.132161437 |

|                 |             |              |             |              |             |             |
|-----------------|-------------|--------------|-------------|--------------|-------------|-------------|
| ENSG00000076984 | 417.7994246 | 0.186902811  | 0.112537367 | 1.66080668   | 0.096752279 | 0.204311375 |
| ENSG00000077044 | 216.653276  | -0.035594118 | 0.124878521 | -0.285029948 | 0.775621198 | 0.86552026  |
| ENSG00000077092 | 14.60862246 | 0.183468329  | 0.448228718 | 0.40931855   | 0.682305904 | 0.799028849 |
| ENSG00000077097 | 3345.129228 | 0.271906343  | 0.058951313 | 4.612388219  | 3.98E-06    | 3.11E-05    |
| ENSG00000077147 | 1185.158272 | -0.28459329  | 0.069487838 | -4.095584155 | 4.21E-05    | 0.000263369 |
| ENSG00000077150 | 360.9328045 | 0.429843145  | 0.109291248 | 3.93300609   | 8.39E-05    | 0.000493263 |
| ENSG00000077152 | 272.5490883 | -0.301177849 | 0.115576593 | -2.605872365 | 0.00916406  | 0.029978471 |
| ENSG00000077157 | 300.3594058 | -0.227755026 | 0.113920208 | -1.999250444 | 0.045581263 | 0.113384098 |
| ENSG00000077232 | 471.4820497 | 0.038316681  | 0.092384469 | 0.414752411  | 0.67832316  | 0.795757928 |
| ENSG00000077235 | 2134.652219 | -0.107695193 | 0.06131328  | -1.756474168 | 0.079007478 | 0.174719466 |
| ENSG00000077238 | 31.79368081 | -1.358919523 | 0.347135552 | -3.914665371 | 9.05E-05    | 0.000526136 |
| ENSG00000077254 | 262.4515241 | -0.150137509 | 0.12304701  | -1.220163815 | 0.222402781 | 0.380615481 |
| ENSG00000077312 | 2136.356064 | 0.349670572  | 0.061910184 | 5.648029953  | 1.62E-08    | 1.93E-07    |
| ENSG00000077327 | 9.563976542 | -2.758407758 | 0.731746243 | -3.769623398 | 0.000163494 | 0.000893619 |
| ENSG00000077348 | 108.0028039 | 0.536718626  | 0.171705344 | 3.125812006  | 0.001773149 | 0.00737124  |
| ENSG00000077380 | 1089.907853 | 0.322110152  | 0.069477526 | 4.636177628  | 3.55E-06    | 2.81E-05    |
| ENSG00000077454 | 62.71879508 | -0.331924992 | 0.241297862 | -1.375581986 | 0.168951087 | 0.311407528 |
| ENSG00000077458 | 169.0554461 | -0.117390633 | 0.139830057 | -0.839523596 | 0.401175554 | 0.569453618 |
| ENSG00000077463 | 55.07106147 | -0.004701537 | 0.236250111 | -0.019900677 | 0.984122605 | 0.991961125 |
| ENSG00000077514 | 234.9089275 | -0.247606345 | 0.122516313 | -2.02100715  | 0.043279025 | 0.109047617 |
| ENSG00000077522 | 135.1628257 | 0.164612152  | 0.157858619 | 1.042782161  | 0.297049195 | 0.467576204 |
| ENSG00000077549 | 1055.871675 | -0.014227625 | 0.076398106 | -0.186230075 | 0.85226434  | 0.915251049 |
| ENSG00000077585 | 217.5608194 | 0.950946995  | 0.136032834 | 6.990569623  | 2.74E-12    | 5.19E-11    |
| ENSG00000077684 | 559.1326098 | -0.180464921 | 0.089611733 | -2.013853706 | 0.044024895 | 0.110437097 |
| ENSG00000077713 | 205.3601452 | 0.342727785  | 0.136540663 | 2.510078513  | 0.012070432 | 0.037855182 |
| ENSG00000077721 | 260.4735902 | 0.423386221  | 0.119635378 | 3.538971741  | 0.000401689 | 0.00199101  |
| ENSG00000077782 | 870.4389173 | 0.429809134  | 0.085169123 | 5.046537019  | 4.50E-07    | 4.27E-06    |
| ENSG00000077942 | 1237.300202 | -0.403207272 | 0.068780018 | -5.862273422 | 4.57E-09    | 5.84E-08    |
| ENSG00000078018 | 37.78979858 | -3.194450873 | 0.399524638 | -7.995629225 | 1.29E-15    | 3.27E-14    |
| ENSG00000078043 | 392.0117605 | -0.124414914 | 0.106816188 | -1.164757113 | 0.244117323 | 0.407293897 |
| ENSG00000078061 | 356.8464228 | -0.090908444 | 0.110849781 | -0.820104861 | 0.412156331 | 0.580465208 |
| ENSG00000078070 | 115.8579798 | -0.11636409  | 0.171349087 | -0.679105396 | 0.497071084 | 0.655435794 |
| ENSG00000078081 | 10.08344312 | -0.30475489  | 0.568631787 | -0.535944167 | 0.591997138 | 0.732410058 |
| ENSG00000078114 | 40.94751669 | -2.225708558 | 0.327919659 | -6.78735933  | 1.14E-11    | 2.00E-10    |
| ENSG00000078124 | 106.9158817 | -0.320016933 | 0.174086505 | -1.838263876 | 0.066023531 | 0.151963386 |
| ENSG00000078140 | 653.7236087 | -0.220058716 | 0.08361044  | -2.631952617 | 0.00848957  | 0.028158912 |
| ENSG00000078142 | 198.4885559 | -0.151456468 | 0.13528335  | -1.11954995  | 0.262905594 | 0.429372733 |
| ENSG00000078177 | 248.1997966 | -0.426738885 | 0.120305781 | -3.547118704 | 0.000389469 | 0.001938651 |
| ENSG00000078237 | 154.8097069 | -0.77911236  | 0.149219414 | -5.221253302 | 1.78E-07    | 1.80E-06    |
| ENSG00000078246 | 370.6076046 | -0.137776795 | 0.107498521 | -1.281662234 | 0.199961158 | 0.35203088  |
| ENSG00000078269 | 119.7238385 | -0.199123477 | 0.163939457 | -1.214615936 | 0.224512608 | 0.382778461 |
| ENSG00000078304 | 1166.23014  | 1.721074487  | 0.074004624 | 23.25631013  | 1.23E-119   | 4.01E-117   |
| ENSG00000078369 | 2197.735499 | 0.041417474  | 0.079083314 | 0.523719501  | 0.60047365  | 0.738900556 |
| ENSG00000078399 | 96.75377837 | -0.602168217 | 0.190181629 | -3.166279625 | 0.001544023 | 0.006546601 |
| ENSG00000078403 | 861.1100353 | 0.091602993  | 0.07438198  | 1.231521299  | 0.218127956 | 0.375127741 |
| ENSG00000078487 | 17.09348452 | -1.301757571 | 0.443582727 | -2.934644412 | 0.003339301 | 0.012667341 |
| ENSG00000078596 | 18.27254078 | 4.098672878  | 0.653403452 | 6.27280567   | 3.55E-10    | 5.24E-09    |
| ENSG00000078618 | 1105.663298 | -0.023207986 | 0.072789742 | -0.318835939 | 0.749850924 | 0.848168256 |
| ENSG00000078668 | 438.5675629 | 0.156974491  | 0.106526791 | 1.473568186  | 0.140597893 | 0.27166143  |
| ENSG00000078674 | 1637.773355 | -0.270007043 | 0.063347213 | -4.26233502  | 2.02E-05    | 0.000135838 |

|                 |             |              |             |              |             |             |
|-----------------|-------------|--------------|-------------|--------------|-------------|-------------|
| ENSG00000078687 | 535.9761467 | -0.345285485 | 0.090433839 | -3.818100497 | 0.000134483 | 0.000752623 |
| ENSG00000078699 | 220.6288088 | -0.135491488 | 0.127461909 | -1.062995909 | 0.287783807 | 0.457814171 |
| ENSG00000078747 | 175.5037802 | -0.194893995 | 0.139000901 | -1.402105986 | 0.1608836   | 0.300163624 |
| ENSG00000078804 | 317.5149011 | -0.910479698 | 0.114908859 | -7.923494383 | 2.31E-15    | 5.73E-14    |
| ENSG00000078808 | 795.1341978 | 0.666461951  | 0.095585528 | 6.97241479   | 3.12E-12    | 5.86E-11    |
| ENSG00000078902 | 202.8467749 | 0.620043922  | 0.132570297 | 4.677095347  | 2.91E-06    | 2.34E-05    |
| ENSG00000078967 | 170.6171887 | -0.015604997 | 0.147601974 | -0.105723501 | 0.915801734 | 0.954435272 |
| ENSG00000079134 | 310.9477761 | 0.006655928  | 0.108268565 | 0.061476087  | 0.950980058 | 0.973078152 |
| ENSG00000079150 | 30.18511506 | 0.148019338  | 0.327071274 | 0.452559885  | 0.65086569  | 0.775528913 |
| ENSG00000079156 | 184.0245697 | -0.282870704 | 0.144712313 | -1.954710689 | 0.050617228 | 0.123039961 |
| ENSG00000079215 | 51.41927818 | -0.472068606 | 0.261656381 | -1.804154766 | 0.071207048 | 0.161147963 |
| ENSG00000079246 | 2350.37134  | 0.22580771   | 0.069532848 | 3.247496917  | 0.001164249 | 0.005126711 |
| ENSG00000079277 | 92.94882876 | -0.049586253 | 0.189629244 | -0.261490539 | 0.793714245 | 0.877138226 |
| ENSG00000079308 | 36.66389475 | -0.48657686  | 0.296270803 | -1.642338207 | 0.100519933 | 0.210495453 |
| ENSG00000079313 | 651.835086  | 0.250716399  | 0.108504169 | 2.310661426  | 0.020851563 | 0.059751512 |
| ENSG00000079332 | 686.1133459 | -0.210699865 | 0.081801106 | -2.57575815  | 0.010002058 | 0.032297953 |
| ENSG00000079335 | 248.5286565 | -0.643305146 | 0.122508997 | -5.2510849   | 1.51E-07    | 1.55E-06    |
| ENSG00000079385 | 215.4766033 | -6.129294961 | 0.370026451 | -16.56447789 | 1.26E-61    | 1.72E-59    |
| ENSG00000079387 | 334.8291897 | -0.197355894 | 0.112964164 | -1.747066388 | 0.080625823 | 0.177601808 |
| ENSG00000079432 | 1291.277629 | 0.18166455   | 0.093638978 | 1.940052688  | 0.052373287 | 0.126512271 |
| ENSG00000079435 | 92.13334612 | -0.541383544 | 0.196099754 | -2.760755851 | 0.005766777 | 0.020155739 |
| ENSG00000079459 | 1386.720611 | 0.112619509  | 0.070313383 | 1.601679569  | 0.109226485 | 0.224806512 |
| ENSG00000079462 | 533.5910854 | 0.318959068  | 0.092299287 | 3.455704587  | 0.000548856 | 0.002634924 |
| ENSG00000079482 | 111.1369855 | -0.170508533 | 0.17699578  | -0.963348011 | 0.335372907 | 0.507124904 |
| ENSG00000079616 | 1315.905233 | 0.11521355   | 0.066050388 | 1.744328139  | 0.081101888 | 0.178452101 |
| ENSG00000079691 | 223.8215168 | -0.608548733 | 0.125839206 | -4.835923198 | 1.33E-06    | 1.14E-05    |
| ENSG00000079739 | 354.9166822 | 0.033344384  | 0.106329579 | 0.313594619  | 0.753828947 | 0.851208619 |
| ENSG00000079785 | 1241.36233  | 0.209923089  | 0.072536223 | 2.894044923  | 0.003803137 | 0.014155451 |
| ENSG00000079805 | 934.9493574 | 0.01570953   | 0.076590156 | 0.205111601  | 0.837484932 | 0.905074151 |
| ENSG00000079819 | 1780.330726 | -0.072516837 | 0.064524691 | -1.123861831 | 0.261071646 | 0.427271747 |
| ENSG00000079841 | 203.9996824 | 0.425040457  | 0.137021953 | 3.10198802   | 0.001922257 | 0.007909183 |
| ENSG00000079950 | 114.5480901 | -0.107314272 | 0.166803992 | -0.643355537 | 0.519993428 | 0.674538277 |
| ENSG00000079974 | 50.37943156 | 0.128661084  | 0.247593507 | 0.519646439  | 0.603310024 | 0.741253138 |
| ENSG00000079999 | 732.2800993 | -0.099972686 | 0.081496332 | -1.226713942 | 0.219930126 | 0.377487595 |
| ENSG00000080031 | 103.5757346 | 0.594719033  | 0.189076878 | 3.145382127  | 0.0016587   | 0.006971802 |
| ENSG00000080189 | 322.8274577 | 0.198879703  | 0.107176457 | 1.855628647  | 0.063506507 | 0.147330714 |
| ENSG00000080200 | 211.914028  | 0.943752863  | 0.129357687 | 7.295684444  | 2.97E-13    | 6.23E-12    |
| ENSG00000080224 | 89.12399783 | -4.445662447 | 0.346292445 | -12.8378846  | 1.01E-37    | 7.25E-36    |
| ENSG00000080298 | 120.4511549 | -0.154558114 | 0.168087564 | -0.919509514 | 0.357829132 | 0.529153154 |
| ENSG00000080345 | 1679.938364 | -0.071129509 | 0.067277781 | -1.057251102 | 0.290397003 | 0.460719076 |
| ENSG00000080371 | 383.0583832 | -0.24804027  | 0.104575503 | -2.371877378 | 0.017697963 | 0.052271507 |
| ENSG00000080493 | 6.042188483 | -5.875395725 | 1.306278874 | -4.497811181 | 6.87E-06    | 5.10E-05    |
| ENSG00000080503 | 42.1430517  | 1.191278688  | 0.292389064 | 4.074292903  | 4.62E-05    | 0.000286745 |
| ENSG00000080546 | 110.0060817 | -0.307344511 | 0.169562544 | -1.812573133 | 0.069897685 | 0.15885015  |
| ENSG00000080561 | 102.3844099 | -0.220315539 | 0.176201337 | -1.250362469 | 0.211167168 | 0.366275621 |
| ENSG00000080603 | 151.2272561 | -0.138357921 | 0.148391884 | -0.932381997 | 0.351139145 | 0.522671567 |
| ENSG00000080608 | 884.954894  | 0.238079957  | 0.081053815 | 2.937307248  | 0.003310759 | 0.012569252 |
| ENSG00000080644 | 25.8327322  | -0.662329469 | 0.342153824 | -1.935765211 | 0.052896464 | 0.127406828 |
| ENSG00000080802 | 682.6927883 | 0.44734873   | 0.089771906 | 4.983170695  | 6.26E-07    | 5.80E-06    |
| ENSG00000080815 | 367.8984915 | -0.192067493 | 0.105110317 | -1.827294398 | 0.067655517 | 0.15500849  |

|                 |             |              |             |              |             |             |
|-----------------|-------------|--------------|-------------|--------------|-------------|-------------|
| ENSG00000080819 | 191.0585707 | 0.091770481  | 0.132094253 | 0.694734854  | 0.487221481 | 0.647676578 |
| ENSG00000080822 | 194.6866474 | 0.096896303  | 0.142460975 | 0.680160327  | 0.496402949 | 0.65504671  |
| ENSG00000080823 | 210.6137175 | 0.1302694    | 0.130198361 | 1.000545623  | 0.31704653  | 0.48874351  |
| ENSG00000080824 | 4209.558897 | 0.651681025  | 0.055309814 | 11.78237593  | 4.81E-32    | 2.82E-30    |
| ENSG00000080839 | 271.215575  | -0.005926981 | 0.116986528 | -0.05066379  | 0.959593431 | 0.978612525 |
| ENSG00000080845 | 466.4804169 | -0.022033158 | 0.100183973 | -0.219926972 | 0.82592803  | 0.898324082 |
| ENSG00000080986 | 220.670379  | 0.028078298  | 0.129927931 | 0.216106716  | 0.828904565 | 0.89997137  |
| ENSG00000081014 | 224.0159043 | -0.026532025 | 0.128441906 | -0.206568293 | 0.836347024 | 0.904331203 |
| ENSG00000081019 | 165.1608271 | -0.152215234 | 0.14223421  | -1.070173162 | 0.284541372 | 0.454166006 |
| ENSG00000081026 | 102.2100092 | 0.292693641  | 0.177334141 | 1.650520536  | 0.098836517 | 0.207806698 |
| ENSG00000081059 | 138.4137415 | 0.378055267  | 0.155040862 | 2.438423405  | 0.014751485 | 0.044870962 |
| ENSG00000081087 | 158.9562451 | 0.231078783  | 0.155130017 | 1.489581367  | 0.136334344 | 0.265873738 |
| ENSG00000081138 | 7.491597126 | -6.186768487 | 1.291588567 | -4.790045875 | 1.67E-06    | 1.41E-05    |
| ENSG00000081154 | 514.6261581 | -0.042769634 | 0.088038871 | -0.485803977 | 0.627106155 | 0.758020838 |
| ENSG00000081177 | 110.8665485 | 0.183801512  | 0.170715986 | 1.076650853  | 0.281636276 | 0.450739976 |
| ENSG00000081181 | 8.686718568 | -0.69714095  | 0.643269098 | -1.083746992 | 0.278476994 | 0.447353079 |
| ENSG00000081307 | 275.2646278 | 0.230404266  | 0.123766314 | 1.861607235  | 0.062658473 | 0.145777036 |
| ENSG00000081320 | 98.16010739 | -0.29372382  | 0.187804302 | -1.563988775 | 0.117820205 | 0.238269304 |
| ENSG00000081377 | 62.85066174 | -0.909864599 | 0.233032996 | -3.904445359 | 9.44E-05    | 0.00054661  |
| ENSG00000081386 | 133.5231617 | -0.202911046 | 0.156944141 | -1.292887036 | 0.196050132 | 0.347103126 |
| ENSG00000081692 | 187.7350829 | 0.006667425  | 0.138973756 | 0.047976145  | 0.961735254 | 0.979729866 |
| ENSG00000081721 | 172.8933819 | -0.122069587 | 0.142909096 | -0.854176471 | 0.393007218 | 0.561159532 |
| ENSG00000081760 | 151.9153238 | -0.134555952 | 0.151922941 | -0.885685539 | 0.375787003 | 0.545716162 |
| ENSG00000081791 | 609.1461615 | -0.042433941 | 0.089173218 | -0.475859703 | 0.634174332 | 0.763476761 |
| ENSG00000081870 | 120.8380221 | 0.06473437   | 0.172827526 | 0.37456053   | 0.707987332 | 0.81689601  |
| ENSG00000081913 | 170.7596406 | -0.1670997   | 0.14507867  | -1.151786818 | 0.249408686 | 0.41362973  |
| ENSG00000082014 | 578.8071335 | 0.526303538  | 0.086283994 | 6.099665918  | 1.06E-09    | 1.48E-08    |
| ENSG00000082068 | 206.5271054 | -0.067457214 | 0.136337693 | -0.49478037  | 0.620755162 | 0.753970589 |
| ENSG00000082126 | 8.693898657 | -3.481393758 | 0.866650205 | -4.017069098 | 5.89E-05    | 0.000356017 |
| ENSG00000082146 | 40.92954537 | -0.370302363 | 0.296803505 | -1.247634737 | 0.212164851 | 0.367255658 |
| ENSG00000082153 | 530.084704  | 0.140582597  | 0.089834527 | 1.564906083  | 0.117604932 | 0.237902719 |
| ENSG00000082196 | 9.692986068 | -1.172200908 | 0.587539359 | -1.99510193  | 0.046031764 | 0.114241729 |
| ENSG00000082212 | 646.8819329 | 0.061367549  | 0.083298451 | 0.736718962  | 0.461293273 | 0.624585702 |
| ENSG00000082213 | 158.527074  | -0.020633787 | 0.157222836 | -0.131239121 | 0.89558615  | 0.943333732 |
| ENSG00000082258 | 323.4594971 | 0.080178969  | 0.106724329 | 0.751271713  | 0.45248915  | 0.61715847  |
| ENSG00000082269 | 215.830937  | -0.1664617   | 0.129552765 | -1.284894997 | 0.198828979 | 0.350564914 |
| ENSG00000082458 | 215.2575235 | -2.235108057 | 0.147697059 | -15.13305726 | 9.80E-52    | 1.11E-49    |
| ENSG00000082512 | 239.1632578 | -0.059347721 | 0.119892674 | -0.495007066 | 0.620595133 | 0.753848135 |
| ENSG00000082515 | 168.6715775 | 0.272318986  | 0.147301222 | 1.848721841  | 0.064497988 | 0.14918545  |
| ENSG00000082516 | 772.8358032 | 0.203556061  | 0.077392289 | 2.630185316  | 0.008533834 | 0.028290788 |
| ENSG00000082641 | 1221.253517 | -0.106855007 | 0.069154666 | -1.545159753 | 0.122307627 | 0.245647016 |
| ENSG00000082701 | 857.8609071 | -0.273779612 | 0.075722819 | -3.615549644 | 0.000299711 | 0.001537634 |
| ENSG00000082781 | 258.693583  | 0.056510883  | 0.117944066 | 0.479132907  | 0.631844081 | 0.761725204 |
| ENSG00000082805 | 735.7338112 | -0.423176301 | 0.085640365 | -4.941318296 | 7.76E-07    | 7.05E-06    |
| ENSG00000082898 | 2044.640933 | 0.058800409  | 0.064394833 | 0.913123098  | 0.361177803 | 0.532159624 |
| ENSG00000082996 | 106.774403  | -0.126728071 | 0.173223431 | -0.731587349 | 0.464420472 | 0.627219918 |
| ENSG00000083093 | 230.2589033 | 0.024585188  | 0.131126725 | 0.187491818  | 0.851275038 | 0.914699033 |
| ENSG00000083097 | 89.55429662 | -0.077617643 | 0.185370259 | -0.418716808 | 0.675423111 | 0.793548715 |
| ENSG00000083099 | 202.7401303 | -0.039770119 | 0.134791469 | -0.29504923  | 0.767956272 | 0.860382976 |
| ENSG00000083123 | 177.9509037 | 0.468858577  | 0.15237354  | 3.0770341    | 0.002090714 | 0.008473242 |



|                 |             |              |             |              |             |             |
|-----------------|-------------|--------------|-------------|--------------|-------------|-------------|
| ENSG00000083168 | 1297.254751 | -0.226139482 | 0.068744431 | -3.289568037 | 0.001003413 | 0.004508938 |
| ENSG00000083223 | 333.6016319 | -0.242450155 | 0.10856734  | -2.233177635 | 0.025537233 | 0.070572793 |
| ENSG00000083290 | 172.1122874 | -0.249903587 | 0.142246632 | -1.756833072 | 0.078946266 | 0.174639087 |
| ENSG00000083312 | 1738.881399 | 0.221659214  | 0.070800175 | 3.130772123  | 0.001743474 | 0.00727587  |
| ENSG00000083444 | 2886.61218  | 0.393023711  | 0.062430811 | 6.29534847   | 3.07E-10    | 4.55E-09    |
| ENSG00000083454 | 30.15321989 | -0.122279983 | 0.316096961 | -0.386843274 | 0.698872238 | 0.810992014 |
| ENSG00000083457 | 36.52310001 | 0.299936229  | 0.295825472 | 1.013895886  | 0.310632435 | 0.482043064 |
| ENSG00000083520 | 672.7685766 | -0.095095918 | 0.082425199 | -1.153723848 | 0.248613404 | 0.412749377 |
| ENSG00000083535 | 130.9416854 | 0.039262279  | 0.16932215  | 0.231879163  | 0.816631869 | 0.892216525 |
| ENSG00000083544 | 297.0446912 | -0.410766037 | 0.115886236 | -3.544562772 | 0.000393265 | 0.001954083 |
| ENSG00000083635 | 106.5917194 | 0.264415011  | 0.177746207 | 1.48759861   | 0.13685678  | 0.26648561  |
| ENSG00000083642 | 683.1622372 | -0.132420999 | 0.080612517 | -1.642685331 | 0.100448055 | 0.21040767  |
| ENSG00000083720 | 504.6944607 | 0.565598227  | 0.093135794 | 6.072834101  | 1.26E-09    | 1.73E-08    |
| ENSG00000083750 | 57.05569293 | -0.292079133 | 0.231036713 | -1.264210909 | 0.206154336 | 0.359643562 |
| ENSG00000083799 | 120.2661225 | 0.474617216  | 0.168426001 | 2.817956927  | 0.004833029 | 0.01738084  |
| ENSG00000083807 | 168.7186976 | 0.06514646   | 0.141992561 | 0.458801921  | 0.646376415 | 0.772319358 |
| ENSG00000083812 | 71.06420216 | 0.247795733  | 0.206967277 | 1.197270102  | 0.231201294 | 0.390628407 |
| ENSG00000083817 | 22.15184171 | 0.195249066  | 0.367871566 | 0.530753351  | 0.59558971  | 0.735203051 |
| ENSG00000083828 | 123.4240381 | 0.516366905  | 0.166267637 | 3.105636868  | 0.001898697 | 0.007832893 |
| ENSG00000083838 | 33.83552692 | -0.297520141 | 0.302614687 | -0.983164909 | 0.325526282 | 0.497624082 |
| ENSG00000083844 | 283.231422  | 0.146169531  | 0.117018428 | 1.249115492  | 0.211622835 | 0.366543276 |
| ENSG00000083845 | 8466.580351 | 0.224370123  | 0.162846788 | 1.377798885  | 0.168265391 | 0.310553665 |
| ENSG00000083857 | 3167.552226 | -0.50424524  | 0.066981345 | -7.528144422 | 5.15E-14    | 1.15E-12    |
| ENSG00000083896 | 603.9542476 | -0.126580355 | 0.085327907 | -1.483457868 | 0.137952802 | 0.267988247 |
| ENSG00000083937 | 144.6710802 | -0.00959992  | 0.149151115 | -0.064363713 | 0.948680623 | 0.971432914 |
| ENSG00000084070 | 281.5195465 | 0.515488456  | 0.1154389   | 4.465465781  | 7.99E-06    | 5.87E-05    |
| ENSG00000084072 | 208.2470803 | 0.077672374  | 0.1296495   | 0.599095049  | 0.549109503 | 0.69718384  |
| ENSG00000084073 | 190.1527758 | -0.21029509  | 0.140007393 | -1.502028463 | 0.133089758 | 0.261397068 |
| ENSG00000084090 | 501.8725348 | 0.0211962    | 0.095157371 | 0.222748907  | 0.823730935 | 0.896764198 |
| ENSG00000084092 | 295.4228512 | 0.294591794  | 0.111559651 | 2.640666151  | 0.008274321 | 0.027542509 |
| ENSG00000084093 | 1000.286807 | -0.091278229 | 0.074415865 | -1.226596364 | 0.219974337 | 0.37751735  |
| ENSG00000084112 | 528.423774  | -0.02737843  | 0.087823234 | -0.311744726 | 0.755234534 | 0.852042366 |
| ENSG00000084207 | 2845.322106 | 0.34232938   | 0.057880489 | 5.914417568  | 3.33E-09    | 4.33E-08    |
| ENSG00000084234 | 2526.872826 | -0.093964221 | 0.061673591 | -1.523573046 | 0.127615401 | 0.252943916 |
| ENSG00000084444 | 128.4051162 | -0.110010319 | 0.164760799 | -0.667697169 | 0.504326918 | 0.662082263 |
| ENSG00000084463 | 1140.761213 | -0.071453936 | 0.070560091 | -1.012667845 | 0.311218842 | 0.482646216 |
| ENSG00000084623 | 525.8099539 | 0.146867936  | 0.099038097 | 1.482943843  | 0.138089332 | 0.268179295 |
| ENSG00000084628 | 31.99031549 | -1.619082259 | 0.334508748 | -4.840179117 | 1.30E-06    | 1.12E-05    |
| ENSG00000084636 | 583.2914231 | 5.754984029  | 0.191377917 | 30.07130673  | 1.15E-198   | 9.50E-196   |
| ENSG00000084652 | 1314.610585 | 0.188173476  | 0.068040556 | 2.765607563  | 0.005681686 | 0.019909584 |
| ENSG00000084676 | 519.3229129 | -0.11191279  | 0.094950443 | -1.178644209 | 0.23853988  | 0.400139682 |
| ENSG00000084693 | 361.4190897 | -0.501374289 | 0.103324191 | -4.852438541 | 1.22E-06    | 1.06E-05    |
| ENSG00000084710 | 237.5253322 | -0.062731123 | 0.120742481 | -0.519544752 | 0.603380914 | 0.741253138 |
| ENSG00000084731 | 377.5841914 | 0.214852972  | 0.102159392 | 2.103115219  | 0.035455699 | 0.092384753 |
| ENSG00000084733 | 545.315364  | -0.218147909 | 0.088679454 | -2.459959979 | 0.013895251 | 0.042598557 |
| ENSG00000084754 | 3098.408732 | 0.125616768  | 0.055110223 | 2.279373242  | 0.022644888 | 0.063797179 |
| ENSG00000084764 | 150.4292113 | 0.359434917  | 0.148120201 | 2.426643453  | 0.015239224 | 0.04612484  |
| ENSG00000084774 | 1790.088304 | 0.104326987  | 0.072032689 | 1.448328357  | 0.147525241 | 0.281752149 |
| ENSG00000085063 | 182.4260589 | 0.443490139  | 0.142558466 | 3.110935131  | 0.001864959 | 0.007711828 |
| ENSG00000085185 | 937.4234663 | -0.420165258 | 0.078987997 | -5.319355765 | 1.04E-07    | 1.09E-06    |

|                 |             |              |             |              |             |             |
|-----------------|-------------|--------------|-------------|--------------|-------------|-------------|
| ENSG00000085224 | 1891.738605 | -0.201384217 | 0.071720294 | -2.807911192 | 0.004986398 | 0.017863792 |
| ENSG00000085231 | 77.80818007 | -0.174145549 | 0.202531175 | -0.859845644 | 0.389874135 | 0.558214797 |
| ENSG00000085274 | 136.9110046 | -0.082272584 | 0.168958092 | -0.486940774 | 0.626300303 | 0.757437827 |
| ENSG00000085365 | 298.3561636 | -0.121794372 | 0.110382789 | -1.103381904 | 0.269861352 | 0.437174767 |
| ENSG00000085377 | 360.7199525 | -0.054203904 | 0.103845008 | -0.521969277 | 0.601691722 | 0.739842754 |
| ENSG00000085382 | 263.3926036 | -1.673348211 | 0.13121096  | -12.75311312 | 3.00E-37    | 2.11E-35    |
| ENSG00000085415 | 473.6888443 | 0.017717298  | 0.093962736 | 0.18855664   | 0.850440319 | 0.914361666 |
| ENSG00000085433 | 75.77451079 | 0.187192769  | 0.206037004 | 0.908539558  | 0.363593224 | 0.534581748 |
| ENSG00000085449 | 276.1719792 | -0.237909648 | 0.114291888 | -2.081596972 | 0.037379298 | 0.096446587 |
| ENSG00000085465 | 21.21155054 | -1.114158107 | 0.400324685 | -2.783136163 | 0.005383621 | 0.019038255 |
| ENSG00000085511 | 472.5437666 | -0.273472411 | 0.098793381 | -2.768124829 | 0.005637986 | 0.019789301 |
| ENSG00000085514 | 9.498151457 | 0.344356036  | 0.578899166 | 0.594846317  | 0.551946204 | 0.699430612 |
| ENSG00000085552 | 11.04373034 | -1.948682408 | 0.586319357 | -3.323585322 | 0.000888682 | 0.004045146 |
| ENSG00000085644 | 107.0807444 | 0.550765547  | 0.170794779 | 3.224721221  | 0.001260954 | 0.005495693 |
| ENSG00000085662 | 490.5439521 | 0.177596467  | 0.091718832 | 1.936314085  | 0.052829245 | 0.127288577 |
| ENSG00000085719 | 327.6967231 | -0.13613522  | 0.108680852 | -1.252614585 | 0.210346005 | 0.365458296 |
| ENSG00000085721 | 301.3795425 | 0.110243617  | 0.119968107 | 0.918941042  | 0.358126411 | 0.529369851 |
| ENSG00000085733 | 3394.054491 | 1.01307397   | 0.057272838 | 17.68855888  | 5.14E-70    | 8.20E-68    |
| ENSG00000085741 | 15.22155003 | -1.459208174 | 0.470895907 | -3.098791371 | 0.001943118 | 0.007983322 |
| ENSG00000085760 | 603.0495147 | 0.007983119  | 0.093091658 | 0.085755468  | 0.931660808 | 0.963061253 |
| ENSG00000085788 | 379.9095451 | -0.516079422 | 0.108961114 | -4.736363313 | 2.18E-06    | 1.80E-05    |
| ENSG00000085831 | 215.7024031 | 0.942519325  | 0.13685079  | 6.887204098  | 5.69E-12    | 1.03E-10    |
| ENSG00000085832 | 479.634397  | -0.026645145 | 0.097390716 | -0.273590201 | 0.784399566 | 0.871011269 |
| ENSG00000085840 | 163.2061827 | 0.102778633  | 0.158284614 | 0.649328008  | 0.516126386 | 0.671234308 |
| ENSG00000085872 | 1374.5629   | 0.346221124  | 0.068740296 | 5.036654533  | 4.74E-07    | 4.48E-06    |
| ENSG00000085978 | 277.9807929 | 0.234149946  | 0.113505636 | 2.062892692  | 0.039122825 | 0.100047027 |
| ENSG00000085982 | 183.7552086 | -0.009343469 | 0.13647562  | -0.068462551 | 0.94541743  | 0.969665557 |
| ENSG00000085998 | 343.6879382 | 0.011930746  | 0.110795874 | 0.107682223  | 0.914247772 | 0.953636867 |
| ENSG00000085999 | 221.9948666 | -0.274920286 | 0.1276649   | -2.153452404 | 0.031283141 | 0.083273504 |
| ENSG00000086015 | 613.9979249 | 0.015681494  | 0.083276893 | 0.188305463  | 0.850637203 | 0.914433366 |
| ENSG00000086061 | 2130.778526 | 0.266501409  | 0.065986846 | 4.038705087  | 5.37E-05    | 0.000327542 |
| ENSG00000086062 | 398.8841461 | -0.164762703 | 0.10012086  | -1.645638104 | 0.099838289 | 0.209474003 |
| ENSG00000086065 | 261.379769  | 0.183847376  | 0.116067589 | 1.583968252  | 0.113200944 | 0.23109049  |
| ENSG00000086102 | 500.0653567 | 0.425817935  | 0.097886675 | 4.350111352  | 1.36E-05    | 9.49E-05    |
| ENSG00000086159 | 78.93495889 | -0.485966772 | 0.205230376 | -2.367908601 | 0.017888955 | 0.05269158  |
| ENSG00000086189 | 323.0775583 | 0.266787818  | 0.107895055 | 2.472660289  | 0.013411156 | 0.041403627 |
| ENSG00000086200 | 153.5330706 | -0.25386588  | 0.148585833 | -1.708547012 | 0.087534891 | 0.189082364 |
| ENSG00000086232 | 941.1424255 | 0.005217228  | 0.077368911 | 0.067433127  | 0.946236898 | 0.970132815 |
| ENSG00000086289 | 104.7709185 | 0.576968692  | 0.181127855 | 3.185422211  | 0.00144543  | 0.006192116 |
| ENSG00000086475 | 521.5541652 | 0.06762689   | 0.094419871 | 0.716235778  | 0.473845775 | 0.634943394 |
| ENSG00000086504 | 284.8295506 | 0.244633752  | 0.114102877 | 2.143975321  | 0.032034864 | 0.084904479 |
| ENSG00000086506 | 76.23890607 | 0.187976762  | 0.200364741 | 0.938172863  | 0.348155582 | 0.520159695 |
| ENSG00000086544 | 147.8544145 | 0.252872132  | 0.15990694  | 1.581370585  | 0.113793329 | 0.231839783 |
| ENSG00000086589 | 280.4157503 | 0.179716177  | 0.121919311 | 1.47405834   | 0.140465884 | 0.271518409 |
| ENSG00000086598 | 1551.426083 | 0.768155801  | 0.070908261 | 10.83309316  | 2.40E-27    | 1.17E-25    |
| ENSG00000086619 | 424.5170416 | -3.062410988 | 0.127939974 | -23.93631079 | 1.28E-126   | 4.87E-124   |
| ENSG00000086666 | 436.4634741 | -0.006389812 | 0.098868698 | -0.06462927  | 0.948469179 | 0.971358017 |
| ENSG00000086712 | 759.2259003 | 0.438643308  | 0.081297755 | 5.395515612  | 6.83E-08    | 7.38E-07    |
| ENSG00000086758 | 5223.303127 | -0.011650926 | 0.055579345 | -0.209626896 | 0.833958886 | 0.902721285 |
| ENSG00000086827 | 132.9356527 | 0.004479159  | 0.164466531 | 0.027234469  | 0.978272724 | 0.988831902 |

|                 |             |              |             |              |             |             |
|-----------------|-------------|--------------|-------------|--------------|-------------|-------------|
| ENSG00000086848 | 53.8115997  | 0.054962901  | 0.243275583 | 0.225928554  | 0.821256989 | 0.895180952 |
| ENSG00000087008 | 88.64085872 | 0.155497027  | 0.190890816 | 0.814586214  | 0.415309204 | 0.583209876 |
| ENSG00000087053 | 237.9254749 | 0.166912544  | 0.127140117 | 1.312823586  | 0.1892424   | 0.338478825 |
| ENSG00000087074 | 427.4024247 | -0.082964417 | 0.103407521 | -0.80230544  | 0.422376296 | 0.589928798 |
| ENSG00000087076 | 135.0897805 | -2.089450921 | 0.177336135 | -11.78243182 | 4.81E-32    | 2.82E-30    |
| ENSG00000087077 | 372.8478054 | 0.683287149  | 0.101339205 | 6.742574562  | 1.56E-11    | 2.70E-10    |
| ENSG00000087085 | 67.12677378 | -1.754612979 | 0.234868536 | -7.470617444 | 7.98E-14    | 1.75E-12    |
| ENSG00000087086 | 20043.46747 | 0.229577996  | 0.068110208 | 3.370684117  | 0.000749818 | 0.003473843 |
| ENSG00000087087 | 1752.351474 | 0.501795412  | 0.071679031 | 7.000588674  | 2.55E-12    | 4.86E-11    |
| ENSG00000087088 | 216.9691877 | 0.141962945  | 0.140670011 | 1.009191254  | 0.31288292  | 0.484076461 |
| ENSG00000087095 | 81.57750754 | -0.29230548  | 0.205104956 | -1.425150744 | 0.154113631 | 0.29108971  |
| ENSG00000087111 | 599.2785194 | 0.300257023  | 0.087448853 | 3.433515859  | 0.000595807 | 0.002834614 |
| ENSG00000087152 | 262.32291   | 0.012596175  | 0.132662247 | 0.094949209  | 0.92435517  | 0.958686031 |
| ENSG00000087157 | 161.7016956 | -0.259982177 | 0.147873951 | -1.758133706 | 0.078724762 | 0.174286325 |
| ENSG00000087191 | 1025.417442 | 0.311133916  | 0.073450458 | 4.235969727  | 2.28E-05    | 0.000151141 |
| ENSG00000087206 | 214.6207354 | 0.011971114  | 0.128938925 | 0.092843293  | 0.926028057 | 0.959498127 |
| ENSG00000087263 | 293.4526765 | 0.000400905  | 0.110501892 | 0.003628035  | 0.997105253 | 0.998813347 |
| ENSG00000087266 | 191.8837231 | 0.353826265  | 0.132979133 | 2.660765319  | 0.007796328 | 0.026160233 |
| ENSG00000087269 | 877.0737529 | 0.149073176  | 0.078222453 | 1.905759413  | 0.056681427 | 0.134614313 |
| ENSG00000087274 | 1086.713018 | -0.219690396 | 0.072812278 | -3.017216332 | 0.002551077 | 0.010057529 |
| ENSG00000087299 | 171.4798697 | -0.149624179 | 0.142973291 | -1.046518394 | 0.295321757 | 0.465796623 |
| ENSG00000087301 | 110.0913791 | -0.515579915 | 0.17059815  | -3.022189362 | 0.002509535 | 0.009921598 |
| ENSG00000087302 | 864.8060117 | 0.022256103  | 0.079720363 | 0.279177137  | 0.780108888 | 0.868456931 |
| ENSG00000087303 | 354.5349607 | -2.124431615 | 0.128925683 | -16.47795507 | 5.28E-61    | 7.07E-59    |
| ENSG00000087338 | 246.0943146 | 0.256291886  | 0.119008203 | 2.15356488   | 0.031274311 | 0.083272862 |
| ENSG00000087365 | 2087.913587 | 0.072967612  | 0.061208599 | 1.192113726  | 0.233216656 | 0.393371081 |
| ENSG00000087448 | 427.0631273 | -0.069541837 | 0.095108991 | -0.731180469 | 0.464668928 | 0.627409989 |
| ENSG00000087460 | 7521.126522 | -0.634769725 | 0.073249023 | -8.665913927 | 4.48E-18    | 1.35E-16    |
| ENSG00000087470 | 934.8850566 | -0.079050771 | 0.075595433 | -1.045708286 | 0.295695736 | 0.46612479  |
| ENSG00000087502 | 419.8060299 | 0.060261954  | 0.100030993 | 0.602432831  | 0.546886062 | 0.69527636  |
| ENSG00000087586 | 629.1755877 | -0.327013573 | 0.088281549 | -3.704212006 | 0.000212049 | 0.001128277 |
| ENSG00000087842 | 117.9814677 | 0.444924579  | 0.173081819 | 2.57060263   | 0.010152174 | 0.032708163 |
| ENSG00000087884 | 37.60034996 | -0.74681292  | 0.303428434 | -2.46124897  | 0.013845425 | 0.042473615 |
| ENSG00000087903 | 163.1408698 | 0.311402732  | 0.147102128 | 2.116915208  | 0.034267045 | 0.089887802 |
| ENSG00000087995 | 474.7937197 | 0.137907448  | 0.095724112 | 1.440676181  | 0.149676187 | 0.284583297 |
| ENSG00000088035 | 47.55726972 | -0.284511128 | 0.253191631 | -1.123698785 | 0.261140832 | 0.427285413 |
| ENSG00000088038 | 915.994461  | 0.219379809  | 0.076668527 | 2.861406356  | 0.004217661 | 0.015497118 |
| ENSG00000088179 | 331.4459292 | -0.285421398 | 0.106222832 | -2.687006105 | 0.007209564 | 0.024473837 |
| ENSG00000088205 | 608.7530961 | 0.151423011  | 0.089749739 | 1.68716938   | 0.091570787 | 0.196051646 |
| ENSG00000088247 | 4529.395908 | 0.150299565  | 0.070113285 | 2.143667428  | 0.032059544 | 0.08492182  |
| ENSG00000088256 | 599.6578719 | 0.213475502  | 0.093441511 | 2.284589581  | 0.022336904 | 0.06303128  |
| ENSG00000088280 | 160.1598275 | -0.349595806 | 0.143049839 | -2.44387417  | 0.014530493 | 0.044286565 |
| ENSG00000088298 | 77.71767642 | -0.469118407 | 0.206620575 | -2.270434139 | 0.023181255 | 0.065086366 |
| ENSG00000088305 | 225.4134378 | -0.380743289 | 0.128666025 | -2.959159491 | 0.003084794 | 0.011816772 |
| ENSG00000088325 | 1294.06408  | -0.166123229 | 0.070367773 | -2.360785644 | 0.018236268 | 0.053602188 |
| ENSG00000088340 | 163.4583104 | -0.203480705 | 0.162057501 | -1.255608066 | 0.209258106 | 0.363973776 |
| ENSG00000088356 | 85.49424337 | 0.5606057    | 0.192528331 | 2.911808862  | 0.003593424 | 0.01351093  |
| ENSG00000088367 | 378.4960211 | 0.597837308  | 0.10618395  | 5.63020409   | 1.80E-08    | 2.14E-07    |
| ENSG00000088387 | 217.0627575 | -0.551811528 | 0.126208677 | -4.372215459 | 1.23E-05    | 8.64E-05    |
| ENSG00000088448 | 405.5960153 | -0.093570773 | 0.098795037 | -0.947120181 | 0.343577542 | 0.515472727 |

|                 |             |              |             |              |             |             |
|-----------------|-------------|--------------|-------------|--------------|-------------|-------------|
| ENSG00000088451 | 103.4627348 | 0.110288316  | 0.174959199 | 0.63036592   | 0.528455203 | 0.681090948 |
| ENSG00000088538 | 289.0539303 | 0.209023199  | 0.116616541 | 1.792397524  | 0.073069311 | 0.164179315 |
| ENSG00000088543 | 155.6240431 | -0.110373987 | 0.151225327 | -0.729864426 | 0.465473059 | 0.628097989 |
| ENSG00000088682 | 356.9105401 | -0.054049604 | 0.106456422 | -0.507715763 | 0.611652692 | 0.747517508 |
| ENSG00000088727 | 36.52057637 | 0.414134107  | 0.287149737 | 1.442223533  | 0.149239324 | 0.283957615 |
| ENSG00000088756 | 8.537864255 | -6.374616706 | 1.274279981 | -5.002524408 | 5.66E-07    | 5.28E-06    |
| ENSG00000088766 | 16.24987749 | 0.69036541   | 0.433953062 | 1.590875764  | 0.111637538 | 0.228563255 |
| ENSG00000088808 | 176.9643468 | -0.044338031 | 0.140105632 | -0.316461443 | 0.751652286 | 0.849638663 |
| ENSG00000088812 | 495.8134247 | -0.111476426 | 0.100211346 | -1.112413226 | 0.265960521 | 0.432751933 |
| ENSG00000088826 | 16.05101005 | -1.053644408 | 0.46535482  | -2.264174265 | 0.023563399 | 0.065961551 |
| ENSG00000088832 | 621.964021  | 0.407113175  | 0.111463699 | 3.652428345  | 0.000259772 | 0.001351488 |
| ENSG00000088833 | 483.2090522 | 0.47349182   | 0.093075263 | 5.08719294   | 3.63E-07    | 3.51E-06    |
| ENSG00000088836 | 191.0979135 | 0.100597662  | 0.132714252 | 0.758001946  | 0.448449818 | 0.613495772 |
| ENSG00000088854 | 158.597536  | 0.063863854  | 0.145719203 | 0.438266564  | 0.661193061 | 0.783316094 |
| ENSG00000088876 | 113.331895  | 0.531815684  | 0.173039006 | 3.073386146  | 0.002116444 | 0.008552846 |
| ENSG00000088881 | 5.014363428 | -5.606114238 | 1.333042561 | -4.205502812 | 2.61E-05    | 0.000170914 |
| ENSG00000088888 | 909.996617  | 0.047703514  | 0.076721818 | 0.621772464  | 0.534091495 | 0.685336917 |
| ENSG00000088899 | 40.96204952 | -0.44716399  | 0.291657305 | -1.533182887 | 0.1252308   | 0.249768145 |
| ENSG00000088930 | 942.8634791 | -0.037421298 | 0.076020569 | -0.492252276 | 0.622541013 | 0.75505595  |
| ENSG00000088970 | 35.18942952 | 2.0935277    | 0.325912398 | 6.423590249  | 1.33E-10    | 2.07E-09    |
| ENSG00000088986 | 765.2278564 | 0.349908184  | 0.102047844 | 3.428864056  | 0.000606113 | 0.002876375 |
| ENSG00000088992 | 23.58785002 | -1.876039795 | 0.413217294 | -4.540080537 | 5.62E-06    | 4.27E-05    |
| ENSG00000089006 | 451.2944949 | -0.116726572 | 0.096134374 | -1.214202238 | 0.224670506 | 0.382809194 |
| ENSG00000089009 | 2734.08473  | 0.217927074  | 0.062895757 | 3.464893079  | 0.000530442 | 0.002553504 |
| ENSG00000089022 | 383.3489196 | -0.050529581 | 0.105639262 | -0.478321984 | 0.632421052 | 0.762019087 |
| ENSG00000089048 | 520.4737614 | 0.216194791  | 0.089486387 | 2.415951729  | 0.015694142 | 0.047328383 |
| ENSG00000089050 | 131.5019918 | 0.035763088  | 0.155067612 | 0.230628999  | 0.817603037 | 0.892507031 |
| ENSG00000089053 | 745.024483  | 0.067543174  | 0.082917096 | 0.814586819  | 0.415308858 | 0.583209876 |
| ENSG00000089057 | 224.5238242 | 0.119992578  | 0.125741071 | 0.954283096  | 0.339940362 | 0.511717865 |
| ENSG00000089060 | 79.70990795 | -0.197505987 | 0.20311359  | -0.972391787 | 0.330855676 | 0.503197237 |
| ENSG00000089063 | 233.7065958 | 0.040532856  | 0.121194647 | 0.334444279  | 0.738044331 | 0.839322273 |
| ENSG00000089091 | 34.71662997 | 0.027516338  | 0.302289848 | 0.091026339  | 0.927471662 | 0.960497968 |
| ENSG00000089094 | 747.4231374 | 0.026720847  | 0.080745589 | 0.330926398  | 0.740700082 | 0.841524915 |
| ENSG00000089123 | 72.43791558 | -0.182233499 | 0.224511356 | -0.811689451 | 0.416969849 | 0.584957103 |
| ENSG00000089127 | 10.40961116 | 6.970020605  | 1.277961504 | 5.454014523  | 4.92E-08    | 5.45E-07    |
| ENSG00000089154 | 985.4885405 | -0.017559495 | 0.080051786 | -0.219351691 | 0.826376099 | 0.898460144 |
| ENSG00000089157 | 3072.142225 | -0.005217341 | 0.072125233 | -0.072337253 | 0.942333518 | 0.968180144 |
| ENSG00000089159 | 316.6613493 | -0.697840428 | 0.112404233 | -6.20831095  | 5.36E-10    | 7.73E-09    |
| ENSG00000089177 | 267.1335794 | 0.04208937   | 0.11478565  | 0.366677977  | 0.713859236 | 0.821528813 |
| ENSG00000089195 | 214.4035999 | 0.277049701  | 0.126019994 | 2.198458304  | 0.027916463 | 0.075981894 |
| ENSG00000089199 | 16.80941507 | -0.699717786 | 0.437930783 | -1.59778169  | 0.110091571 | 0.226222395 |
| ENSG00000089220 | 1291.068055 | 0.143985277  | 0.070041629 | 2.055709987  | 0.039810479 | 0.101473017 |
| ENSG00000089234 | 187.1339511 | -0.050064428 | 0.138315433 | -0.361958368 | 0.717383141 | 0.823964104 |
| ENSG00000089248 | 1023.585939 | 0.417439691  | 0.086849161 | 4.806490763  | 1.54E-06    | 1.31E-05    |
| ENSG00000089280 | 4210.619446 | -0.13000703  | 0.05585927  | -2.327402938 | 0.01994383  | 0.057632375 |
| ENSG00000089289 | 139.0496195 | -0.744780024 | 0.161294023 | -4.617530211 | 3.88E-06    | 3.05E-05    |
| ENSG00000089327 | 1042.256893 | 0.730624735  | 0.073713214 | 9.911719922  | 3.70E-23    | 1.46E-21    |
| ENSG00000089335 | 72.18079078 | -0.207214231 | 0.214131732 | -0.967695117 | 0.333196657 | 0.505498806 |
| ENSG00000089351 | 467.7437394 | 0.094416761  | 0.101505913 | 0.930160207  | 0.352288142 | 0.523715899 |
| ENSG00000089486 | 310.9583097 | 0.492232272  | 0.110486906 | 4.455118628  | 8.38E-06    | 6.12E-05    |

|                 |             |              |             |              |             |             |
|-----------------|-------------|--------------|-------------|--------------|-------------|-------------|
| ENSG00000089505 | 24.06410033 | -0.980020353 | 0.371300577 | -2.639425884 | 0.008304658 | 0.027630396 |
| ENSG00000089597 | 2951.45157  | 0.244335135  | 0.066511341 | 3.673586041  | 0.00023917  | 0.001254995 |
| ENSG00000089639 | 59.1044628  | 0.331135251  | 0.226126157 | 1.464382786  | 0.143089389 | 0.275339267 |
| ENSG00000089682 | 248.1091784 | -0.030304849 | 0.123034161 | -0.246312476 | 0.805440353 | 0.88501413  |
| ENSG00000089685 | 667.7637712 | -0.067557421 | 0.081741037 | -0.82648108  | 0.408531246 | 0.577095577 |
| ENSG00000089692 | 16.70273818 | -0.21402549  | 0.428976587 | -0.498921146 | 0.617834937 | 0.751600186 |
| ENSG00000089693 | 1775.549548 | 0.010035964  | 0.071529106 | 0.140306014  | 0.888418213 | 0.93888133  |
| ENSG00000089723 | 39.34495711 | 0.657785815  | 0.28110482  | 2.340001909  | 0.019283641 | 0.056035852 |
| ENSG00000089737 | 1098.091535 | 0.23896974   | 0.070750338 | 3.377648016  | 0.000731086 | 0.00339602  |
| ENSG00000089775 | 148.2468704 | 0.046368165  | 0.151433639 | 0.306194615  | 0.759456472 | 0.85495152  |
| ENSG00000089818 | 162.3620803 | 0.303752006  | 0.143672549 | 2.114196546  | 0.034498484 | 0.090343065 |
| ENSG00000089820 | 327.3497104 | -0.563834436 | 0.118826472 | -4.745023788 | 2.08E-06    | 1.73E-05    |
| ENSG00000089847 | 23.88785764 | -1.488524934 | 0.384639842 | -3.869918738 | 0.000108872 | 0.000621873 |
| ENSG00000089876 | 179.6605841 | -0.123255526 | 0.141226669 | -0.872749647 | 0.38279955  | 0.552299228 |
| ENSG00000089902 | 812.4204194 | 0.240829098  | 0.084728888 | 2.842349318  | 0.004478239 | 0.016305295 |
| ENSG00000089916 | 703.1695691 | -0.005907505 | 0.083356894 | -0.070870019 | 0.943501204 | 0.968637121 |
| ENSG00000090006 | 1413.533545 | -0.750933324 | 0.093852518 | -8.001205972 | 1.23E-15    | 3.14E-14    |
| ENSG00000090013 | 371.0965386 | 0.26810957   | 0.103165938 | 2.598818717  | 0.009354516 | 0.030523319 |
| ENSG00000090020 | 215.1617747 | 0.232368221  | 0.140883167 | 1.649368243  | 0.099072217 | 0.208177625 |
| ENSG00000090054 | 341.0253766 | -0.186345868 | 0.105911038 | -1.759456529 | 0.078499998 | 0.173980667 |
| ENSG00000090060 | 1852.625609 | 0.270257011  | 0.066389701 | 4.070767078  | 4.69E-05    | 0.000290377 |
| ENSG00000090061 | 656.8928056 | -0.093812797 | 0.087609794 | -1.070802624 | 0.284258187 | 0.453798699 |
| ENSG00000090097 | 266.2467841 | 0.04642189   | 0.116081908 | 0.399906327  | 0.689225512 | 0.804480669 |
| ENSG00000090263 | 260.0559854 | 0.425411297  | 0.11540466  | 3.686257545  | 0.000227576 | 0.001199985 |
| ENSG00000090266 | 400.2112534 | 1.034154827  | 0.11567957  | 8.939822545  | 3.90E-19    | 1.27E-17    |
| ENSG00000090273 | 1949.879963 | 0.377268137  | 0.075352405 | 5.006716593  | 5.54E-07    | 5.19E-06    |
| ENSG00000090316 | 352.9924604 | -0.462465473 | 0.106512119 | -4.341904718 | 1.41E-05    | 9.81E-05    |
| ENSG00000090339 | 16.79982446 | -2.227229258 | 0.50213528  | -4.435516381 | 9.19E-06    | 6.63E-05    |
| ENSG00000090372 | 640.434278  | 0.098827677  | 0.0845584   | 1.168750566  | 0.242504142 | 0.405240981 |
| ENSG00000090432 | 232.4161425 | -0.215393985 | 0.127678731 | -1.686999737 | 0.091603402 | 0.196083439 |
| ENSG00000090447 | 321.7350062 | 0.046254682  | 0.11134739  | 0.415408762  | 0.677842693 | 0.79559294  |
| ENSG00000090470 | 277.2036864 | 0.265529311  | 0.123636274 | 2.147665097  | 0.03174037  | 0.08425113  |
| ENSG00000090487 | 336.2263022 | 0.307565267  | 0.106900095 | 2.877128099  | 0.004013126 | 0.014843682 |
| ENSG00000090520 | 155.6338679 | 0.283161095  | 0.1443803   | 1.961216969  | 0.049853718 | 0.121584607 |
| ENSG00000090565 | 316.0008601 | 0.329909447  | 0.120328024 | 2.741750726  | 0.00611127  | 0.021178285 |
| ENSG00000090581 | 139.6353182 | 0.445096585  | 0.157879534 | 2.819216494  | 0.004814104 | 0.017330526 |
| ENSG00000090612 | 130.0927027 | -0.189718005 | 0.164531062 | -1.153083207 | 0.248876234 | 0.413038861 |
| ENSG00000090615 | 1431.638997 | 0.381566333  | 0.075384362 | 5.061611197  | 4.16E-07    | 3.98E-06    |
| ENSG00000090621 | 1559.639079 | 0.055506551  | 0.065196795 | 0.851369318  | 0.39456423  | 0.562684643 |
| ENSG00000090661 | 162.2431836 | -0.242269606 | 0.16678212  | -1.452611383 | 0.146331684 | 0.279929343 |
| ENSG00000090674 | 83.99324055 | 0.665566095  | 0.195644052 | 3.401923477  | 0.000669134 | 0.003139386 |
| ENSG00000090686 | 911.7924918 | 0.158093026  | 0.074734985 | 2.115381779  | 0.034397422 | 0.090162452 |
| ENSG00000090776 | 102.5968395 | -0.117772091 | 0.178261476 | -0.660670457 | 0.508823674 | 0.665497779 |
| ENSG00000090857 | 567.8904518 | -0.124160221 | 0.088055045 | -1.410029607 | 0.158530941 | 0.2968783   |
| ENSG00000090861 | 1616.527752 | -0.324248836 | 0.066409861 | -4.882540465 | 1.05E-06    | 9.23E-06    |
| ENSG00000090863 | 1203.659438 | -1.017901984 | 0.070922196 | -14.35237552 | 1.03E-46    | 9.77E-45    |
| ENSG00000090889 | 354.7561053 | 0.112272226  | 0.102330137 | 1.097157332  | 0.272572621 | 0.44055087  |
| ENSG00000090905 | 1153.311497 | 0.013356549  | 0.069427854 | 0.192380265  | 0.84744435  | 0.912257704 |
| ENSG00000090924 | 1292.188694 | -0.162272144 | 0.070821116 | -2.29129608  | 0.021946295 | 0.06226613  |
| ENSG00000090932 | 94.51259889 | 0.348714338  | 0.183709942 | 1.898178906  | 0.057672519 | 0.136293047 |

|                 |             |              |             |              |             |             |
|-----------------|-------------|--------------|-------------|--------------|-------------|-------------|
| ENSG00000090971 | 250.4215727 | 0.074719149  | 0.119632261 | 0.624573572  | 0.532250969 | 0.683849875 |
| ENSG00000090975 | 122.5912535 | 0.429326665  | 0.163619256 | 2.623937268  | 0.008691979 | 0.028667817 |
| ENSG00000090989 | 112.9250125 | -0.025068764 | 0.175765357 | -0.142626307 | 0.88658532  | 0.938065731 |
| ENSG00000091009 | 172.8280704 | -0.083450534 | 0.148411586 | -0.562291232 | 0.573917611 | 0.718394287 |
| ENSG00000091039 | 617.6458647 | -0.05493358  | 0.084318154 | -0.651503585 | 0.514721464 | 0.670589167 |
| ENSG00000091073 | 96.99592365 | 0.380060983  | 0.184283433 | 2.062371953  | 0.039172337 | 0.100105442 |
| ENSG00000091127 | 411.5137381 | 0.777067697  | 0.106301153 | 7.310059002  | 2.67E-13    | 5.62E-12    |
| ENSG00000091136 | 1722.309782 | 0.769097266  | 0.075673684 | 10.16333846  | 2.89E-24    | 1.22E-22    |
| ENSG00000091140 | 506.5721049 | 0.522318006  | 0.093952982 | 5.55935526   | 2.71E-08    | 3.12E-07    |
| ENSG00000091157 | 207.1821637 | -0.013063428 | 0.128659588 | -0.101534819 | 0.919125919 | 0.955581501 |
| ENSG00000091164 | 685.4038197 | 0.329629886  | 0.093460973 | 3.526925466  | 0.000420415 | 0.002074314 |
| ENSG00000091262 | 108.5403068 | -0.576244359 | 0.18863094  | -3.0548772   | 0.002251527 | 0.00904927  |
| ENSG00000091317 | 485.8650787 | 0.173391553  | 0.090531921 | 1.915253226  | 0.055460218 | 0.132288958 |
| ENSG00000091409 | 171.7753956 | -2.231248481 | 0.174175452 | -12.81034991 | 1.43E-37    | 1.02E-35    |
| ENSG00000091428 | 10.69187833 | 0.302961084  | 0.545405502 | 0.555478599  | 0.578567344 | 0.722026962 |
| ENSG00000091436 | 623.8508804 | 0.084825533  | 0.085631515 | 0.990587789  | 0.321886903 | 0.493780814 |
| ENSG00000091483 | 556.6680847 | 0.310738749  | 0.093115389 | 3.337136365  | 0.000846464 | 0.003866758 |
| ENSG00000091490 | 384.6437527 | 1.171576706  | 0.103288944 | 11.34271163  | 8.06E-30    | 4.37E-28    |
| ENSG00000091527 | 1356.498749 | 0.103558086  | 0.067843177 | 1.52643333   | 0.126901982 | 0.252063369 |
| ENSG00000091536 | 46.25823888 | 0.283924607  | 0.265832169 | 1.068059627  | 0.285493616 | 0.455148865 |
| ENSG00000091542 | 838.4485734 | 0.100684777  | 0.082383944 | 1.222140782  | 0.221654393 | 0.379473402 |
| ENSG00000091622 | 10.83849958 | -0.356886666 | 0.537192536 | -0.66435522  | 0.506462987 | 0.663949991 |
| ENSG00000091640 | 876.0535482 | 0.046740768  | 0.08113503  | 0.576086168  | 0.56455694  | 0.710622166 |
| ENSG00000091651 | 350.479231  | -0.060176954 | 0.103107008 | -0.583635925 | 0.559465285 | 0.706155886 |
| ENSG00000091732 | 174.9718962 | 0.632478988  | 0.142305072 | 4.444528782  | 8.81E-06    | 6.39E-05    |
| ENSG00000091947 | 126.9659352 | 0.213121642  | 0.163390929 | 1.304366426  | 0.192108677 | 0.342412205 |
| ENSG00000091972 | 53.66472965 | -0.903227297 | 0.248836353 | -3.62980443  | 0.000283636 | 0.001463716 |
| ENSG00000091986 | 549.3288166 | -1.141293099 | 0.094275198 | -12.10597398 | 9.82E-34    | 6.10E-32    |
| ENSG00000092010 | 549.9224138 | 0.182695305  | 0.101683356 | 1.796708066  | 0.072381978 | 0.163097472 |
| ENSG00000092020 | 136.8775279 | -0.125495235 | 0.157755902 | -0.795502629 | 0.426321182 | 0.593579721 |
| ENSG00000092036 | 73.12316688 | -0.650309054 | 0.210813916 | -3.084753915 | 0.002037206 | 0.008293941 |
| ENSG00000092051 | 23.68662675 | 0.71670653   | 0.362756361 | 1.975724224  | 0.04818602  | 0.118561748 |
| ENSG00000092068 | 125.3753591 | 1.239882654  | 0.168483674 | 7.359067053  | 1.85E-13    | 3.98E-12    |
| ENSG00000092094 | 219.2490535 | 0.058955394  | 0.12498611  | 0.471695567  | 0.637144102 | 0.765870546 |
| ENSG00000092096 | 90.88681234 | -0.146606932 | 0.195027177 | -0.751725655 | 0.452216059 | 0.616965713 |
| ENSG00000092098 | 11.81708529 | 0.180040228  | 0.499561541 | 0.360396495  | 0.718550647 | 0.824765561 |
| ENSG00000092108 | 403.3592418 | -0.214679278 | 0.099940239 | -2.148076491 | 0.031707679 | 0.084196177 |
| ENSG00000092140 | 241.7186741 | -0.403298333 | 0.129271132 | -3.119786509 | 0.001809822 | 0.007501494 |
| ENSG00000092148 | 1211.963903 | 0.123997754  | 0.073255255 | 1.692680675  | 0.090516266 | 0.194238006 |
| ENSG00000092199 | 2893.929041 | 0.193962795  | 0.063020074 | 3.077793825  | 0.002085391 | 0.008459075 |
| ENSG00000092201 | 2732.858084 | -0.141618522 | 0.07329438  | -1.93218802  | 0.053336303 | 0.128202439 |
| ENSG00000092203 | 351.1899549 | 0.186594975  | 0.106392192 | 1.753840871  | 0.079457778 | 0.175494246 |
| ENSG00000092208 | 25.63544866 | -0.303831486 | 0.354763772 | -0.856433238 | 0.391758187 | 0.560088725 |
| ENSG00000092330 | 141.4890704 | 0.1316034    | 0.15390771  | 0.85507997   | 0.392506878 | 0.560718408 |
| ENSG00000092421 | 16.79359873 | -1.924646537 | 0.475973124 | -4.04360339  | 5.26E-05    | 0.000321608 |
| ENSG00000092439 | 538.7350805 | -0.150975728 | 0.095899364 | -1.574314174 | 0.115414834 | 0.234315968 |
| ENSG00000092445 | 86.06120133 | 0.946617034  | 0.201273889 | 4.703128847  | 2.56E-06    | 2.09E-05    |
| ENSG00000092470 | 361.8570565 | -0.066345559 | 0.105651684 | -0.627964997 | 0.53002687  | 0.682240213 |
| ENSG00000092529 | 14.14030922 | -0.076173004 | 0.464717375 | -0.163912538 | 0.869799997 | 0.927577954 |
| ENSG00000092531 | 213.0206526 | -0.302861391 | 0.135541766 | -2.234450676 | 0.025453435 | 0.070382755 |

|                 |             |              |             |              |             |             |
|-----------------|-------------|--------------|-------------|--------------|-------------|-------------|
| ENSG00000092607 | 36.71868677 | 1.254575668  | 0.303544112 | 4.133091757  | 3.58E-05    | 0.000227598 |
| ENSG00000092621 | 1380.619109 | -0.402745454 | 0.077339968 | -5.207468557 | 1.91E-07    | 1.93E-06    |
| ENSG00000092758 | 70.04285199 | 1.026523696  | 0.219154217 | 4.684024384  | 2.81E-06    | 2.27E-05    |
| ENSG00000092820 | 1330.599035 | -0.078349377 | 0.069346572 | -1.129823354 | 0.258550666 | 0.424332422 |
| ENSG00000092841 | 353.9917141 | -0.10403151  | 0.13441067  | -0.773982527 | 0.438941124 | 0.604253819 |
| ENSG00000092847 | 566.7776173 | -0.658148281 | 0.091894906 | -7.161966943 | 7.95E-13    | 1.60E-11    |
| ENSG00000092853 | 786.2866616 | -0.325476347 | 0.077920244 | -4.177044744 | 2.95E-05    | 0.000190818 |
| ENSG00000092871 | 89.93850837 | -0.138220872 | 0.185058327 | -0.746904366 | 0.45512129  | 0.61888565  |
| ENSG00000092929 | 12.59894382 | -0.403073846 | 0.498604371 | -0.808404155 | 0.418857961 | 0.586785457 |
| ENSG00000092931 | 99.15823193 | -0.013962191 | 0.178616952 | -0.078168342 | 0.937694144 | 0.965886166 |
| ENSG00000092964 | 1274.939617 | -0.01586008  | 0.070663505 | -0.224445134 | 0.822410955 | 0.896299688 |
| ENSG00000092969 | 103.644109  | 0.541330437  | 0.175116372 | 3.091261149  | 0.001993083 | 0.008145718 |
| ENSG00000092978 | 438.0683036 | -0.568312086 | 0.103639545 | -5.483544751 | 4.17E-08    | 4.68E-07    |
| ENSG00000093000 | 590.4203229 | 0.126191265  | 0.08921991  | 1.414384588  | 0.157249013 | 0.295273461 |
| ENSG00000093009 | 317.9762282 | 0.044767458  | 0.111396234 | 0.401875866  | 0.687775385 | 0.803224213 |
| ENSG00000093010 | 251.8598771 | 0.383377178  | 0.117141567 | 3.272768048  | 0.001064998 | 0.004753744 |
| ENSG00000093144 | 313.9732168 | 0.146915925  | 0.10853272  | 1.353655602  | 0.175846279 | 0.320627295 |
| ENSG00000093167 | 304.7363846 | 0.154857547  | 0.108759453 | 1.423853686  | 0.154488831 | 0.291719937 |
| ENSG00000093183 | 415.7425173 | 0.03913007   | 0.097712421 | 0.400461572  | 0.688816582 | 0.804194845 |
| ENSG00000093217 | 543.7596018 | 0.486229213  | 0.090632494 | 5.364844248  | 8.10E-08    | 8.64E-07    |
| ENSG00000094631 | 252.982866  | -1.93752318  | 0.137742648 | -14.06625482 | 6.12E-45    | 5.51E-43    |
| ENSG00000094804 | 368.3527667 | -0.0353277   | 0.107619839 | -0.328263828 | 0.742712191 | 0.842720368 |
| ENSG00000094841 | 51.99940396 | 0.219527506  | 0.244466606 | 0.897985658  | 0.369193195 | 0.540608445 |
| ENSG00000094880 | 328.8023686 | -0.170051339 | 0.105249481 | -1.615697653 | 0.106159699 | 0.219782651 |
| ENSG00000094914 | 461.3002122 | -0.062252754 | 0.108587907 | -0.573293614 | 0.566445908 | 0.712087495 |
| ENSG00000094916 | 2596.499366 | -0.648416413 | 0.070533016 | -9.193090742 | 3.82E-20    | 1.30E-18    |
| ENSG00000094975 | 473.0652505 | -0.267303636 | 0.101595633 | -2.631054385 | 0.008512041 | 0.028226781 |
| ENSG00000095002 | 559.3461926 | 0.018759199  | 0.09271591  | 0.20232988   | 0.839658842 | 0.906725688 |
| ENSG00000095015 | 120.6870839 | -0.138660761 | 0.165805011 | -0.836288121 | 0.402992834 | 0.571289494 |
| ENSG00000095059 | 23.5512201  | -0.008853984 | 0.38906191  | -0.022757262 | 0.981843899 | 0.990825814 |
| ENSG00000095066 | 111.7921112 | -0.020835782 | 0.174535556 | -0.119378436 | 0.904975544 | 0.949095974 |
| ENSG00000095139 | 1261.752508 | 0.059352249  | 0.078635262 | 0.754779053  | 0.450381564 | 0.615349942 |
| ENSG00000095203 | 17.26017895 | -0.647425514 | 0.420805473 | -1.538538719 | 0.123916949 | 0.248028125 |
| ENSG00000095209 | 111.240466  | 0.581868459  | 0.173254076 | 3.358469082  | 0.000783755 | 0.003612852 |
| ENSG00000095261 | 485.6628112 | 0.262995195  | 0.096478063 | 2.725958478  | 0.006411506 | 0.022074125 |
| ENSG00000095319 | 1771.509544 | 0.1961913    | 0.067296701 | 2.91531822   | 0.00355326  | 0.013380933 |
| ENSG00000095321 | 352.5333315 | -0.091376242 | 0.111866757 | -0.81683106  | 0.414024979 | 0.582431606 |
| ENSG00000095370 | 10.07744505 | -1.687547754 | 0.603252493 | -2.797415299 | 0.005151327 | 0.018351685 |
| ENSG00000095380 | 376.0585037 | 0.019116289  | 0.104116146 | 0.183605423  | 0.854323008 | 0.916431867 |
| ENSG00000095383 | 18.35430705 | -0.000327219 | 0.418247771 | -0.000782358 | 0.999375769 | 0.999854605 |
| ENSG00000095397 | 217.0365624 | -0.23734247  | 0.142689467 | -1.663349612 | 0.096242473 | 0.203602111 |
| ENSG00000095485 | 104.8232359 | -0.072272237 | 0.179522788 | -0.402579741 | 0.687257416 | 0.802819536 |
| ENSG00000095539 | 244.2941113 | 0.337851304  | 0.122180173 | 2.765189279  | 0.005688977 | 0.019928446 |
| ENSG00000095564 | 741.0115025 | -0.240319528 | 0.084176484 | -2.854948514 | 0.004304381 | 0.015765781 |
| ENSG00000095574 | 90.96114474 | 0.03875204   | 0.188928267 | 0.205115101  | 0.837482198 | 0.905074151 |
| ENSG00000095587 | 10.50004    | -0.091434601 | 0.525391584 | -0.17403134  | 0.861840833 | 0.921610701 |
| ENSG00000095596 | 11.17441191 | -2.259249877 | 0.628188818 | -3.596450325 | 0.000322589 | 0.001639439 |
| ENSG00000095637 | 10.16179693 | -0.168328953 | 0.540294601 | -0.311550314 | 0.7553823   | 0.852072204 |
| ENSG00000095739 | 10.02283495 | -6.605470097 | 1.260051265 | -5.242223298 | 1.59E-07    | 1.62E-06    |
| ENSG00000095752 | 43.72839563 | 0.495564828  | 0.275250564 | 1.800413487  | 0.071795373 | 0.162035604 |

|                 |             |              |             |              |             |             |
|-----------------|-------------|--------------|-------------|--------------|-------------|-------------|
| ENSG00000095787 | 1751.832887 | 0.011815545  | 0.065739401 | 0.179733085  | 0.857362118 | 0.918346431 |
| ENSG00000095794 | 448.1691574 | -0.429775673 | 0.102684437 | -4.18540224  | 2.85E-05    | 0.000184866 |
| ENSG00000095906 | 149.2452848 | 0.196329739  | 0.17058983  | 1.15088771   | 0.249778434 | 0.413789489 |
| ENSG00000095951 | 360.0507492 | -0.131363837 | 0.105369251 | -1.246699928 | 0.212507545 | 0.36771292  |
| ENSG00000096060 | 2166.630632 | 0.213505173  | 0.062523964 | 3.414773447  | 0.000638351 | 0.003009125 |
| ENSG00000096063 | 1026.143311 | -0.013247615 | 0.073527628 | -0.180171931 | 0.857017594 | 0.918060409 |
| ENSG00000096070 | 505.436196  | -0.170052625 | 0.090142183 | -1.886493312 | 0.059228509 | 0.139337274 |
| ENSG00000096080 | 141.0994451 | 0.09814964   | 0.152564857 | 0.643330591  | 0.520009611 | 0.674538277 |
| ENSG00000096092 | 11.05829146 | -0.279140353 | 0.539310377 | -0.51758758  | 0.604746049 | 0.741997252 |
| ENSG00000096093 | 92.26652748 | -0.332366349 | 0.202244941 | -1.643385229 | 0.100303254 | 0.210198391 |
| ENSG00000096384 | 9935.797542 | 0.326694701  | 0.051584595 | 6.333183409  | 2.40E-10    | 3.62E-09    |
| ENSG00000096401 | 520.1632151 | -0.113647148 | 0.092724884 | -1.225638066 | 0.220334907 | 0.377905303 |
| ENSG00000096433 | 636.6562925 | 0.610134099  | 0.090157713 | 6.76740875   | 1.31E-11    | 2.28E-10    |
| ENSG00000096654 | 73.91836858 | -0.173420717 | 0.206068572 | -0.841568004 | 0.400029805 | 0.568171757 |
| ENSG00000096696 | 440.8979657 | -2.246838162 | 0.114713816 | -19.58646525 | 2.02E-85    | 4.05E-83    |
| ENSG00000096717 | 287.1289451 | -0.331280301 | 0.112384339 | -2.947744349 | 0.003201017 | 0.01220871  |
| ENSG00000096746 | 3907.395815 | 0.284931206  | 0.056220931 | 5.068062797  | 4.02E-07    | 3.86E-06    |
| ENSG00000096872 | 127.7470882 | -0.115206986 | 0.168246033 | -0.68475306  | 0.493499761 | 0.652748695 |
| ENSG00000096968 | 76.25992854 | -0.053389812 | 0.205234798 | -0.260140153 | 0.794755666 | 0.877736681 |
| ENSG00000097007 | 961.294854  | 0.158086358  | 0.075630783 | 2.090238278  | 0.036596401 | 0.094875041 |
| ENSG00000097021 | 433.0130787 | 0.402635721  | 0.095260935 | 4.226661447  | 2.37E-05    | 0.000156935 |
| ENSG00000097033 | 347.3603396 | -0.36802586  | 0.106071886 | -3.469589102 | 0.000521255 | 0.002513584 |
| ENSG00000097046 | 303.3450814 | -0.337810364 | 0.119268541 | -2.83235094  | 0.00462071  | 0.016758874 |
| ENSG00000097096 | 262.2385543 | -0.690388356 | 0.123929786 | -5.570802438 | 2.54E-08    | 2.94E-07    |
| ENSG00000099194 | 7212.728582 | -0.061326689 | 0.062949971 | -0.974213146 | 0.329950719 | 0.502255933 |
| ENSG00000099203 | 233.7798627 | 0.483498061  | 0.126262296 | 3.829314659  | 0.000128501 | 0.000721731 |
| ENSG00000099204 | 519.2289364 | 0.298521641  | 0.098066173 | 3.04408373   | 0.002333902 | 0.009319021 |
| ENSG00000099219 | 224.3603173 | -0.749569409 | 0.12730269  | -5.888087736 | 3.91E-09    | 5.04E-08    |
| ENSG00000099246 | 348.3895572 | 0.168924832  | 0.108167832 | 1.561691944  | 0.118360577 | 0.239155787 |
| ENSG00000099250 | 31.32137358 | 0.374159003  | 0.309639016 | 1.208371631  | 0.226904347 | 0.385361548 |
| ENSG00000099256 | 72.02292985 | -0.759325989 | 0.217371828 | -3.49321251  | 0.000477247 | 0.002323703 |
| ENSG00000099282 | 6.488996693 | -3.528303913 | 1.00511098  | -3.510362521 | 0.000447496 | 0.00219482  |
| ENSG00000099284 | 360.8487002 | -0.74713049  | 0.108761146 | -6.869461391 | 6.44E-12    | 1.16E-10    |
| ENSG00000099290 | 200.4849452 | 0.148618561  | 0.130728925 | 1.136845279  | 0.255602971 | 0.420970211 |
| ENSG00000099308 | 534.5156306 | -0.061315856 | 0.092693733 | -0.66148869  | 0.508298966 | 0.665159127 |
| ENSG00000099326 | 255.2521357 | 0.288872012  | 0.125618181 | 2.299603532  | 0.021470692 | 0.061163822 |
| ENSG00000099330 | 137.2190764 | -0.329648854 | 0.162627417 | -2.027018943 | 0.042660475 | 0.107701599 |
| ENSG00000099331 | 1089.135981 | -0.04338     | 0.073729262 | -0.588368838 | 0.556284749 | 0.703356436 |
| ENSG00000099337 | 60.278902   | 0.297597108  | 0.225695359 | 1.318578765  | 0.187309977 | 0.335645005 |
| ENSG00000099338 | 42.48259066 | -0.299249603 | 0.291840359 | -1.025388003 | 0.305180147 | 0.476159671 |
| ENSG00000099341 | 1402.219639 | 0.166807579  | 0.070593395 | 2.362934629  | 0.018130867 | 0.053348198 |
| ENSG00000099364 | 410.7488942 | 0.091675866  | 0.231690059 | 0.395683211  | 0.692338742 | 0.806274442 |
| ENSG00000099365 | 76.88041977 | -0.622128333 | 0.207034751 | -3.004946421 | 0.002656276 | 0.010410914 |
| ENSG00000099377 | 529.5694368 | 1.107757071  | 0.105451381 | 10.50490818  | 8.20E-26    | 3.81E-24    |
| ENSG00000099381 | 825.3114344 | 0.055700294  | 0.079398754 | 0.701526042  | 0.482974789 | 0.643570018 |
| ENSG00000099385 | 221.8065219 | 0.038517296  | 0.135768775 | 0.283697752  | 0.776642018 | 0.866107528 |
| ENSG00000099622 | 828.3992133 | -0.564154061 | 0.076544718 | -7.370254588 | 1.70E-13    | 3.67E-12    |
| ENSG00000099624 | 842.5227435 | 0.421968781  | 0.090426899 | 4.666407759  | 3.07E-06    | 2.45E-05    |
| ENSG00000099625 | 214.3088719 | 0.521569007  | 0.132081586 | 3.948839689  | 7.85E-05    | 0.000463108 |
| ENSG00000099783 | 2803.354425 | 0.283545484  | 0.061613375 | 4.602011876  | 4.18E-06    | 3.24E-05    |



|                 |             |              |             |              |             |             |
|-----------------|-------------|--------------|-------------|--------------|-------------|-------------|
| ENSG00000099785 | 22.64617032 | 0.039823469  | 0.379935632 | 0.104816357  | 0.916521531 | 0.954800179 |
| ENSG00000099795 | 284.2626955 | 0.073702431  | 0.114529101 | 0.643525801  | 0.519882979 | 0.674538277 |
| ENSG00000099797 | 506.7038872 | -0.068567992 | 0.099674273 | -0.687920661 | 0.491502745 | 0.651150276 |
| ENSG00000099800 | 588.8659653 | 0.20974769   | 0.08492442  | 2.469815975  | 0.013518257 | 0.041643871 |
| ENSG00000099804 | 408.7428751 | 0.191459595  | 0.104770096 | 1.827425968  | 0.067635748 | 0.154988475 |
| ENSG00000099810 | 349.3001239 | -0.048217176 | 0.102402076 | -0.470861313 | 0.637739776 | 0.766193178 |
| ENSG00000099814 | 261.294735  | 0.503191482  | 0.123576751 | 4.071894402  | 4.66E-05    | 0.00028933  |
| ENSG00000099817 | 603.4806159 | -0.009282516 | 0.087842127 | -0.105672711 | 0.915842033 | 0.954435272 |
| ENSG00000099821 | 350.1070502 | 0.223703194  | 0.110553445 | 2.023484603  | 0.043023209 | 0.108519846 |
| ENSG00000099822 | 32.2007709  | -1.24488647  | 0.319312242 | -3.898649366 | 9.67E-05    | 0.000558248 |
| ENSG00000099849 | 38.87816801 | -0.135403774 | 0.295206422 | -0.458674895 | 0.646467645 | 0.772319358 |
| ENSG00000099860 | 58.79708086 | 0.815397577  | 0.249193779 | 3.272142588  | 0.001067357 | 0.00476276  |
| ENSG00000099864 | 349.3465639 | -0.032217309 | 0.115671257 | -0.27852476  | 0.780609561 | 0.868601276 |
| ENSG00000099875 | 1392.33195  | 0.242988757  | 0.078551317 | 3.093375996  | 0.001978932 | 0.008104391 |
| ENSG00000099889 | 56.85499847 | -0.660295594 | 0.23466778  | -2.813746287 | 0.004896786 | 0.017587612 |
| ENSG00000099899 | 352.4218815 | 0.375825164  | 0.105839473 | 3.550897911  | 0.000383919 | 0.00191594  |
| ENSG00000099901 | 1188.601013 | -0.014276082 | 0.070924992 | -0.201284224 | 0.840476337 | 0.907329474 |
| ENSG00000099904 | 391.3275849 | 0.418076374  | 0.116323403 | 3.594086523  | 0.000325532 | 0.001652887 |
| ENSG00000099910 | 161.4537948 | 0.012354992  | 0.168555726 | 0.073299156  | 0.941568063 | 0.967676806 |
| ENSG00000099917 | 454.0320804 | 0.254115431  | 0.093928952 | 2.705400473  | 0.006822209 | 0.023279898 |
| ENSG00000099940 | 278.4594675 | -0.113932327 | 0.116215162 | -0.980356828 | 0.326910012 | 0.499087593 |
| ENSG00000099942 | 740.0733047 | -0.064208203 | 0.078802257 | -0.814801573 | 0.415185901 | 0.583209876 |
| ENSG00000099949 | 125.6538281 | 0.431469952  | 0.162630405 | 2.653070632  | 0.007976318 | 0.026696053 |
| ENSG00000099953 | 74.68025757 | -0.153417312 | 0.225810606 | -0.679407023 | 0.496880001 | 0.655429935 |
| ENSG00000099954 | 601.3498956 | -0.667877046 | 0.090863172 | -7.350360236 | 1.98E-13    | 4.21E-12    |
| ENSG00000099956 | 573.6023819 | 0.160573716  | 0.090155296 | 1.78107912   | 0.074899526 | 0.167294267 |
| ENSG00000099958 | 36.79394979 | 1.097644907  | 0.306651492 | 3.579453989  | 0.000344313 | 0.001738992 |
| ENSG00000099968 | 339.4104836 | -0.390791132 | 0.105571996 | -3.701655244 | 0.000214198 | 0.001138416 |
| ENSG00000099977 | 64.17806885 | 0.39730484   | 0.222047001 | 1.78928262   | 0.073569312 | 0.16502283  |
| ENSG00000099991 | 1047.825029 | -0.388976566 | 0.07157044  | -5.434877386 | 5.48E-08    | 6.04E-07    |
| ENSG00000099992 | 44.35745932 | 0.326325909  | 0.275532246 | 1.184347438  | 0.236275558 | 0.39748057  |
| ENSG00000099994 | 17.71600859 | -0.54249526  | 0.411404055 | -1.318643444 | 0.187288342 | 0.335645005 |
| ENSG00000099995 | 1765.266755 | 0.157949653  | 0.069986224 | 2.256867755  | 0.024016339 | 0.067042432 |
| ENSG00000099999 | 59.60015686 | 0.169629557  | 0.229127619 | 0.740327847  | 0.459101088 | 0.62242959  |
| ENSG00000100003 | 33.01289562 | 0.184215528  | 0.309801096 | 0.594625165  | 0.552094055 | 0.699491764 |
| ENSG00000100014 | 141.8783455 | -0.181086359 | 0.157125433 | -1.152495528 | 0.249117506 | 0.413244404 |
| ENSG00000100023 | 399.7056145 | 0.202278723  | 0.099337127 | 2.036285208  | 0.041721724 | 0.105768825 |
| ENSG00000100028 | 214.2288621 | -0.07442184  | 0.125656396 | -0.592264641 | 0.553673389 | 0.700923765 |
| ENSG00000100029 | 1040.271463 | 0.410316818  | 0.071456499 | 5.742190321  | 9.35E-09    | 1.15E-07    |
| ENSG00000100030 | 693.9673949 | -0.0160373   | 0.084666711 | -0.189416827 | 0.849766137 | 0.914037896 |
| ENSG00000100031 | 23.41237938 | 0.677739543  | 0.376592161 | 1.799664501  | 0.07191363  | 0.162224306 |
| ENSG00000100034 | 355.131094  | 0.344558753  | 0.108660428 | 3.170968129  | 0.001519318 | 0.006459401 |
| ENSG00000100036 | 63.68014163 | 1.449957132  | 0.229020222 | 6.331131453  | 2.43E-10    | 3.66E-09    |
| ENSG00000100038 | 141.0952925 | -0.220202371 | 0.15290626  | -1.440113508 | 0.149835288 | 0.2848087   |
| ENSG00000100056 | 105.9176932 | 0.054874135  | 0.17632772  | 0.31120538   | 0.755644493 | 0.852102835 |
| ENSG00000100065 | 39.42377394 | -0.414992311 | 0.281922118 | -1.472010473 | 0.14101805  | 0.272302901 |
| ENSG00000100075 | 766.4892674 | 0.447568949  | 0.099008327 | 4.520518252  | 6.17E-06    | 4.64E-05    |
| ENSG00000100077 | 203.6370207 | -0.473010961 | 0.130599973 | -3.621830481 | 0.000292526 | 0.001504067 |
| ENSG00000100078 | 232.1357231 | 0.77289293   | 0.148024941 | 5.22136961   | 1.78E-07    | 1.80E-06    |
| ENSG00000100083 | 444.3644024 | 0.05874983   | 0.112113816 | 0.524019538  | 0.600264951 | 0.738799769 |

|                 |             |              |             |              |             |             |
|-----------------|-------------|--------------|-------------|--------------|-------------|-------------|
| ENSG00000100084 | 152.7615723 | 0.349214599  | 0.158100346 | 2.208816155  | 0.027187431 | 0.074357835 |
| ENSG00000100092 | 207.4275797 | 0.289225247  | 0.132442    | 2.183787974  | 0.028977832 | 0.078309273 |
| ENSG00000100097 | 2735.347088 | 0.199996601  | 0.06037011  | 3.31284139   | 0.000923533 | 0.004191558 |
| ENSG00000100099 | 313.7802626 | 0.01348277   | 0.109717955 | 0.122885722  | 0.902197592 | 0.947258155 |
| ENSG00000100100 | 64.46025679 | 0.454911253  | 0.21689456  | 2.097384333  | 0.035959567 | 0.093530499 |
| ENSG00000100104 | 162.0920596 | 0.426943168  | 0.14320245  | 2.981395684  | 0.002869378 | 0.011118938 |
| ENSG00000100105 | 392.6428288 | 0.18798459   | 0.116002808 | 1.620517588  | 0.105121139 | 0.218082505 |
| ENSG00000100106 | 721.5258983 | -0.192709785 | 0.08610057  | -2.238194076 | 0.025208402 | 0.069769194 |
| ENSG00000100109 | 146.9842758 | 0.09878564   | 0.151287559 | 0.652966049  | 0.513778166 | 0.669670771 |
| ENSG00000100116 | 85.91860316 | -0.785861561 | 0.201706849 | -3.896057901 | 9.78E-05    | 0.000563326 |
| ENSG00000100124 | 241.6969963 | -0.228230486 | 0.124180168 | -1.837898029 | 0.066077433 | 0.152062532 |
| ENSG00000100129 | 1063.052375 | 0.017882198  | 0.075636351 | 0.236423333  | 0.813104193 | 0.890231847 |
| ENSG00000100138 | 849.0572154 | 0.566012441  | 0.081400468 | 6.953429808  | 3.57E-12    | 6.68E-11    |
| ENSG00000100139 | 254.3395206 | 0.324156044  | 0.120837678 | 2.682574252  | 0.007305793 | 0.024740713 |
| ENSG00000100142 | 759.4047994 | 0.445315319  | 0.082003845 | 5.430420009  | 5.62E-08    | 6.17E-07    |
| ENSG00000100147 | 288.3251786 | -0.025361266 | 0.110395184 | -0.229731631 | 0.818300314 | 0.892848047 |
| ENSG00000100150 | 201.2530498 | 0.162684681  | 0.129986385 | 1.2515517    | 0.210733264 | 0.36590484  |
| ENSG00000100151 | 111.1339846 | 0.089567999  | 0.17409867  | 0.514466877  | 0.606925613 | 0.743700634 |
| ENSG00000100154 | 845.0358439 | -0.074196814 | 0.075384092 | -0.984250294 | 0.324992463 | 0.496998182 |
| ENSG00000100162 | 122.783739  | -0.043630656 | 0.176960977 | -0.24655524  | 0.805252448 | 0.884946107 |
| ENSG00000100167 | 35.28840203 | -0.160877995 | 0.309366696 | -0.520023639 | 0.603047099 | 0.741060465 |
| ENSG00000100196 | 189.9481942 | 0.555992852  | 0.13619704  | 4.082268241  | 4.46E-05    | 0.000277446 |
| ENSG00000100201 | 2986.431079 | 0.02026701   | 0.068017632 | 0.297966997  | 0.765728352 | 0.858773078 |
| ENSG00000100206 | 62.64843699 | -0.773545546 | 0.228165149 | -3.390287906 | 0.000698193 | 0.003264817 |
| ENSG00000100207 | 1242.479287 | 0.042615566  | 0.072274379 | 0.589635871  | 0.555434798 | 0.702516337 |
| ENSG00000100209 | 41.32334162 | -0.440509385 | 0.276459834 | -1.593393798 | 0.111071876 | 0.22770383  |
| ENSG00000100211 | 89.87912504 | 0.245655866  | 0.187193069 | 1.312312826  | 0.189414606 | 0.338727814 |
| ENSG00000100216 | 638.799726  | 0.311548288  | 0.086711425 | 3.592932405  | 0.000326977 | 0.001657543 |
| ENSG00000100219 | 384.3753896 | -0.259122943 | 0.107364213 | -2.413494557 | 0.015800364 | 0.047618046 |
| ENSG00000100220 | 316.7744112 | 0.117347442  | 0.110938289 | 1.057772232  | 0.290159295 | 0.460445958 |
| ENSG00000100221 | 506.0832744 | 0.226306627  | 0.103267734 | 2.191455344  | 0.028418858 | 0.077064333 |
| ENSG00000100225 | 552.512128  | 0.119708761  | 0.088996868 | 1.345089589  | 0.178596305 | 0.324336431 |
| ENSG00000100226 | 627.3803805 | -0.010279846 | 0.094570645 | -0.108700181 | 0.913440298 | 0.953417734 |
| ENSG00000100228 | 80.47226203 | -0.180717511 | 0.195711097 | -0.923389189 | 0.355804424 | 0.527227053 |
| ENSG00000100239 | 400.8980186 | 0.275566411  | 0.100098735 | 2.752945995  | 0.005906164 | 0.020586571 |
| ENSG00000100241 | 613.3350597 | -0.096667178 | 0.092046153 | -1.050203344 | 0.293624632 | 0.463987641 |
| ENSG00000100242 | 253.307469  | 0.395409077  | 0.132727991 | 2.97909336   | 0.002891027 | 0.011184316 |
| ENSG00000100243 | 582.1196243 | -0.051403939 | 0.107306238 | -0.479039615 | 0.631910447 | 0.761730545 |
| ENSG00000100246 | 40.09908053 | -0.137490502 | 0.283481202 | -0.485007475 | 0.627671043 | 0.758494295 |
| ENSG00000100258 | 300.0526141 | 0.260394094  | 0.12558078  | 2.073518684  | 0.038124034 | 0.097974443 |
| ENSG00000100263 | 106.3190884 | 0.350941781  | 0.173835982 | 2.018809787  | 0.043506993 | 0.109366989 |
| ENSG00000100266 | 275.0738845 | -0.143704768 | 0.113855342 | -1.262169745 | 0.206887713 | 0.360788542 |
| ENSG00000100271 | 33.16584478 | -0.248991572 | 0.31625259  | -0.787318681 | 0.431095337 | 0.597552486 |
| ENSG00000100276 | 29.6308986  | -0.111162463 | 0.321670034 | -0.345579169 | 0.729659003 | 0.832888023 |
| ENSG00000100280 | 900.4882364 | 0.098233878  | 0.075947815 | 1.293439163  | 0.195859213 | 0.347068876 |
| ENSG00000100281 | 413.6053565 | -0.100737815 | 0.097006379 | -1.038465884 | 0.29905321  | 0.469468087 |
| ENSG00000100284 | 119.3129875 | 0.267702193  | 0.1643713   | 1.628643153  | 0.103388583 | 0.21521924  |
| ENSG00000100285 | 3454.278705 | 0.790044743  | 0.060516248 | 13.05508473  | 5.94E-39    | 4.49E-37    |
| ENSG00000100292 | 172.8016613 | 1.396433524  | 0.148739177 | 9.38847151   | 6.09E-21    | 2.18E-19    |
| ENSG00000100294 | 143.757103  | 0.251330574  | 0.164700452 | 1.525985935  | 0.127013367 | 0.252210352 |

|                 |             |              |             |              |             |             |
|-----------------|-------------|--------------|-------------|--------------|-------------|-------------|
| ENSG00000100296 | 709.0063314 | 0.461313587  | 0.083656778 | 5.514359983  | 3.50E-08    | 3.98E-07    |
| ENSG00000100297 | 1165.410571 | 0.18102572   | 0.070621354 | 2.563328383  | 0.010367394 | 0.033309877 |
| ENSG00000100299 | 48.56030119 | 0.005376012  | 0.263642166 | 0.020391322  | 0.983731206 | 0.991961125 |
| ENSG00000100300 | 377.1186835 | 0.830298005  | 0.215824342 | 3.847100834  | 0.000119524 | 0.000677543 |
| ENSG00000100304 | 749.7997661 | 0.439788122  | 0.08378873  | 5.24877415   | 1.53E-07    | 1.57E-06    |
| ENSG00000100307 | 62.40284755 | 0.406392186  | 0.227761854 | 1.78428555   | 0.074377277 | 0.166365862 |
| ENSG00000100316 | 4780.545424 | 0.270227123  | 0.05739441  | 4.7082481    | 2.50E-06    | 2.04E-05    |
| ENSG00000100319 | 64.6711839  | 0.2656577    | 0.223989652 | 1.186026664  | 0.23561177  | 0.396663823 |
| ENSG00000100320 | 1590.7094   | -0.471495551 | 0.069146386 | -6.818802491 | 9.18E-12    | 1.63E-10    |
| ENSG00000100321 | 105.2538413 | 0.150626048  | 0.187876268 | 0.801730044  | 0.422709132 | 0.590003496 |
| ENSG00000100324 | 129.8664534 | -0.086190398 | 0.167543375 | -0.514436324 | 0.606946969 | 0.743700634 |
| ENSG00000100325 | 391.0411702 | 0.279266183  | 0.11006527  | 2.537277955  | 0.011171821 | 0.035440509 |
| ENSG00000100330 | 311.5781761 | 0.024567557  | 0.112429458 | 0.218515301  | 0.827027638 | 0.898668717 |
| ENSG00000100335 | 451.2537878 | 0.134600354  | 0.094138073 | 1.429818447  | 0.152769133 | 0.289055498 |
| ENSG00000100344 | 135.7502977 | 0.696340047  | 0.157367843 | 4.424919573  | 9.65E-06    | 6.94E-05    |
| ENSG00000100345 | 5042.172343 | 0.158490248  | 0.054295427 | 2.919034957  | 0.003511168 | 0.01324064  |
| ENSG00000100347 | 295.9178491 | -0.063657742 | 0.12321188  | -0.516652634 | 0.605398666 | 0.742455469 |
| ENSG00000100348 | 630.9609435 | 0.443091729  | 0.090808502 | 4.879407988  | 1.06E-06    | 9.37E-06    |
| ENSG00000100350 | 375.3124148 | 0.241755375  | 0.106608772 | 2.267687452  | 0.023348263 | 0.065489827 |
| ENSG00000100353 | 1470.980345 | 0.330160916  | 0.081054211 | 4.073334516  | 4.63E-05    | 0.000287801 |
| ENSG00000100354 | 1979.150756 | -0.382326806 | 0.062989769 | -6.06966519  | 1.28E-09    | 1.76E-08    |
| ENSG00000100359 | 10.00807819 | 0.094107153  | 0.551215966 | 0.170726464  | 0.864438853 | 0.923615469 |
| ENSG00000100360 | 127.716778  | -0.798840081 | 0.16610261  | -4.809316849 | 1.51E-06    | 1.29E-05    |
| ENSG00000100364 | 335.1459401 | 0.307818292  | 0.107991499 | 2.850393724  | 0.004366514 | 0.015960557 |
| ENSG00000100372 | 97.02359133 | 0.224974302  | 0.184783901 | 1.217499473  | 0.223414237 | 0.381788295 |
| ENSG00000100376 | 136.3787036 | 0.171606209  | 0.165159229 | 1.039034937  | 0.298788488 | 0.469262287 |
| ENSG00000100379 | 83.39358931 | 0.039315302  | 0.196654986 | 0.19992019   | 0.841543    | 0.907853046 |
| ENSG00000100380 | 1541.39313  | 0.178238207  | 0.071005893 | 2.51018893   | 0.012066658 | 0.037851797 |
| ENSG00000100387 | 229.8207891 | 0.117262303  | 0.121536309 | 0.964833512  | 0.334628208 | 0.50630358  |
| ENSG00000100393 | 2154.296334 | -0.093358018 | 0.063634303 | -1.467102075 | 0.14234829  | 0.274326578 |
| ENSG00000100395 | 277.725581  | -0.107138822 | 0.112115874 | -0.955607957 | 0.33927034  | 0.511070291 |
| ENSG00000100401 | 584.5747675 | 0.103312031  | 0.091861755 | 1.124646826  | 0.260738723 | 0.427025398 |
| ENSG00000100403 | 984.0958831 | 0.180415788  | 0.081255347 | 2.220355885  | 0.026394619 | 0.072585203 |
| ENSG00000100410 | 280.9178488 | 0.1334325    | 0.11311933  | 1.179572933  | 0.238170114 | 0.399662595 |
| ENSG00000100412 | 1842.478689 | -0.056558095 | 0.061699341 | -0.916672597 | 0.35931423  | 0.530567328 |
| ENSG00000100413 | 260.6130393 | -0.011104117 | 0.120256148 | -0.092337209 | 0.926430126 | 0.959773138 |
| ENSG00000100416 | 251.8810492 | 0.084042212  | 0.11958107  | 0.702805319  | 0.482177082 | 0.642735004 |
| ENSG00000100417 | 97.79940832 | -0.183553236 | 0.179390069 | -1.023207347 | 0.30620982  | 0.477289097 |
| ENSG00000100418 | 642.7511938 | 0.33282259   | 0.083337308 | 3.993680625  | 6.51E-05    | 0.000390694 |
| ENSG00000100422 | 354.6153693 | -0.420229656 | 0.10370096  | -4.052321758 | 5.07E-05    | 0.000311614 |
| ENSG00000100425 | 775.960049  | 0.018061479  | 0.080615841 | 0.224043801  | 0.822723221 | 0.896348169 |
| ENSG00000100426 | 565.9523548 | 0.043313661  | 0.08591448  | 0.504148554  | 0.61415699  | 0.748942029 |
| ENSG00000100427 | 151.4116218 | -3.893627937 | 0.233887588 | -16.64743292 | 3.16E-62    | 4.44E-60    |
| ENSG00000100429 | 35.32131176 | 0.036376573  | 0.296611984 | 0.122640268  | 0.902391966 | 0.947258155 |
| ENSG00000100439 | 103.85817   | 0.148050563  | 0.188892079 | 0.783783864  | 0.433166944 | 0.599418388 |
| ENSG00000100441 | 413.587523  | -0.13992377  | 0.099658563 | -1.404031579 | 0.160309446 | 0.299330957 |
| ENSG00000100442 | 347.7255564 | -0.172774087 | 0.10373579  | -1.665520526 | 0.095808952 | 0.203021323 |
| ENSG00000100445 | 174.2755192 | 0.285122075  | 0.14798616  | 1.92668067   | 0.054019438 | 0.129556266 |
| ENSG00000100461 | 370.1987124 | -0.223490196 | 0.105132557 | -2.125794356 | 0.033520386 | 0.08820431  |
| ENSG00000100462 | 1137.534298 | 0.42748366   | 0.082677849 | 5.170473901  | 2.34E-07    | 2.33E-06    |

|                 |             |              |             |              |             |             |
|-----------------|-------------|--------------|-------------|--------------|-------------|-------------|
| ENSG00000100478 | 37.09092326 | -0.265622794 | 0.283156583 | -0.938077411 | 0.34820463  | 0.520177649 |
| ENSG00000100479 | 169.3325083 | -0.195316368 | 0.14210255  | -1.37447476  | 0.169294341 | 0.31187903  |
| ENSG00000100483 | 41.75161475 | 0.098769168  | 0.274613792 | 0.359665722  | 0.719097128 | 0.825140781 |
| ENSG00000100485 | 194.5135219 | -0.056932106 | 0.135142743 | -0.421273867 | 0.673555111 | 0.792016461 |
| ENSG00000100490 | 53.39290836 | -0.058259709 | 0.247686482 | -0.235215537 | 0.814041447 | 0.8908414   |
| ENSG00000100503 | 1570.34504  | 0.406784098  | 0.070538276 | 5.766856275  | 8.08E-09    | 1.01E-07    |
| ENSG00000100504 | 1352.288186 | 0.335769081  | 0.068881475 | 4.874591934  | 1.09E-06    | 9.56E-06    |
| ENSG00000100505 | 314.7297138 | 0.383476804  | 0.112667045 | 3.403628855  | 0.00066497  | 0.003122982 |
| ENSG00000100519 | 286.4259065 | 0.533919086  | 0.113653289 | 4.697788247  | 2.63E-06    | 2.14E-05    |
| ENSG00000100522 | 393.1671314 | 0.176430998  | 0.104027486 | 1.696003666  | 0.089885186 | 0.193119793 |
| ENSG00000100523 | 403.3996888 | 0.177331049  | 0.100644219 | 1.761959608  | 0.078076122 | 0.173274477 |
| ENSG00000100526 | 200.9659171 | 0.007270259  | 0.136127071 | 0.053407886  | 0.957406922 | 0.977076206 |
| ENSG00000100528 | 470.9073633 | -0.172916007 | 0.09241231  | -1.871136073 | 0.061326223 | 0.143312169 |
| ENSG00000100532 | 11.37147304 | -0.337708168 | 0.52189747  | -0.647077611 | 0.517581715 | 0.67256895  |
| ENSG00000100554 | 113.4310073 | -0.021397978 | 0.166217288 | -0.128734975 | 0.897567359 | 0.944486149 |
| ENSG00000100564 | 44.69543899 | 0.405793863  | 0.260037171 | 1.560522526  | 0.118636451 | 0.23960981  |
| ENSG00000100567 | 207.4093549 | 0.238619241  | 0.140533852 | 1.69794849   | 0.089517484 | 0.192542585 |
| ENSG00000100568 | 293.7606823 | -0.397904581 | 0.120517896 | -3.301622376 | 0.000961274 | 0.004336228 |
| ENSG00000100575 | 134.5746014 | -0.039249347 | 0.16060716  | -0.244381057 | 0.806935711 | 0.8858602   |
| ENSG00000100577 | 113.4786793 | -0.344733015 | 0.178115878 | -1.935442356 | 0.052936036 | 0.127458433 |
| ENSG00000100578 | 287.8032218 | -0.314390263 | 0.112831016 | -2.786381559 | 0.005330009 | 0.018880375 |
| ENSG00000100580 | 452.9964496 | 0.197859372  | 0.096399728 | 2.052488898  | 0.040122173 | 0.102026822 |
| ENSG00000100583 | 8.094160665 | -0.205494457 | 0.610151504 | -0.336792511 | 0.736273319 | 0.837783014 |
| ENSG00000100591 | 1047.746525 | 0.278636557  | 0.076225558 | 3.655421683  | 0.00025676  | 0.001337301 |
| ENSG00000100592 | 62.8281723  | -0.53789499  | 0.222731445 | -2.414993489 | 0.015735491 | 0.047442894 |
| ENSG00000100593 | 25.75705616 | 0.627171606  | 0.340952554 | 1.839468865  | 0.065846253 | 0.15167962  |
| ENSG00000100596 | 349.16138   | -0.572824876 | 0.104665142 | -5.472928867 | 4.43E-08    | 4.93E-07    |
| ENSG00000100600 | 406.1056872 | 0.160545504  | 0.106353607 | 1.509544513  | 0.131159689 | 0.25843739  |
| ENSG00000100601 | 70.09987811 | -0.021726604 | 0.220440569 | -0.098559916 | 0.921487697 | 0.956727767 |
| ENSG00000100603 | 496.5931004 | 0.066481946  | 0.092268315 | 0.720528451  | 0.471199689 | 0.633139543 |
| ENSG00000100605 | 437.6687624 | -0.134075494 | 0.099602388 | -1.346107226 | 0.178267939 | 0.323966351 |
| ENSG00000100612 | 140.0237176 | -0.743485849 | 0.15912926  | -4.672213328 | 2.98E-06    | 2.39E-05    |
| ENSG00000100614 | 272.936981  | -0.470010448 | 0.119898839 | -3.920058366 | 8.85E-05    | 0.000515994 |
| ENSG00000100625 | 460.4462157 | -2.115980325 | 0.108610431 | -19.48229371 | 1.55E-84    | 3.07E-82    |
| ENSG00000100626 | 50.68860658 | -3.155840858 | 0.345586168 | -9.131849439 | 6.73E-20    | 2.26E-18    |
| ENSG00000100629 | 375.6571046 | -0.497205933 | 0.114457222 | -4.344032857 | 1.40E-05    | 9.73E-05    |
| ENSG00000100632 | 557.0253707 | 0.189358098  | 0.100331997 | 1.887315154  | 0.059117949 | 0.139100475 |
| ENSG00000100644 | 1039.795212 | -0.45951616  | 0.083224457 | -5.521407715 | 3.36E-08    | 3.83E-07    |
| ENSG00000100647 | 69.07206786 | -0.63328875  | 0.220777133 | -2.868452648 | 0.004124849 | 0.015215798 |
| ENSG00000100650 | 2064.555924 | 0.032068885  | 0.059605759 | 0.538016562  | 0.590565615 | 0.731670065 |
| ENSG00000100664 | 887.7305848 | 0.127719809  | 0.080784946 | 1.580985256  | 0.113881409 | 0.23194284  |
| ENSG00000100697 | 1003.878378 | -0.139448567 | 0.075427436 | -1.848777763 | 0.06448991  | 0.14918545  |
| ENSG00000100711 | 183.4927747 | 0.43313765   | 0.138153261 | 3.135196721  | 0.001717389 | 0.007181948 |
| ENSG00000100714 | 1164.055163 | -0.127017272 | 0.068913855 | -1.843131136 | 0.065309866 | 0.150715902 |
| ENSG00000100722 | 561.8897244 | -0.20026911  | 0.086383929 | -2.318360741 | 0.020429724 | 0.058806625 |
| ENSG00000100726 | 263.2323451 | 0.665378883  | 0.135154309 | 4.923105228  | 8.52E-07    | 7.66E-06    |
| ENSG00000100731 | 925.0338117 | -0.115216562 | 0.078401863 | -1.469564089 | 0.141679852 | 0.273300863 |
| ENSG00000100744 | 43.7404952  | 0.001808502  | 0.271049418 | 0.006672221  | 0.994676377 | 0.99758811  |
| ENSG00000100749 | 309.6087516 | -0.022274497 | 0.109247036 | -0.203891092 | 0.838438606 | 0.905825804 |
| ENSG00000100764 | 184.0670517 | 0.555132311  | 0.136765275 | 4.059015067  | 4.93E-05    | 0.000304013 |

|                 |             |              |             |              |             |             |
|-----------------|-------------|--------------|-------------|--------------|-------------|-------------|
| ENSG00000100784 | 69.70827901 | 0.260979035  | 0.226765254 | 1.15087753   | 0.249782623 | 0.413789489 |
| ENSG00000100796 | 857.9898966 | 0.010968895  | 0.082780055 | 0.132506499  | 0.894583683 | 0.942843412 |
| ENSG00000100802 | 88.69370735 | -0.22982493  | 0.189913432 | -1.210156265 | 0.226218936 | 0.384569454 |
| ENSG00000100804 | 997.2836652 | 0.197827017  | 0.07312411  | 2.70535967   | 0.006823047 | 0.023279898 |
| ENSG00000100811 | 1074.75679  | 0.132244376  | 0.073416241 | 1.801295918  | 0.071656251 | 0.161877671 |
| ENSG00000100813 | 2170.770249 | 0.173495035  | 0.061440708 | 2.823779895  | 0.004746097 | 0.017125204 |
| ENSG00000100814 | 274.5257092 | -0.366165525 | 0.118404619 | -3.092493592 | 0.001984825 | 0.008121421 |
| ENSG00000100815 | 772.6526934 | -0.043129238 | 0.080664902 | -0.534671678 | 0.592876909 | 0.733089931 |
| ENSG00000100823 | 1549.340129 | 0.343261748  | 0.064839172 | 5.29404893   | 1.20E-07    | 1.25E-06    |
| ENSG00000100836 | 252.2637458 | 0.1940055    | 0.136951782 | 1.416597122  | 0.15660075  | 0.29436247  |
| ENSG00000100852 | 764.3111157 | -0.210151479 | 0.079766074 | -2.634597236 | 0.008423717 | 0.027980127 |
| ENSG00000100865 | 153.0474825 | 0.130261443  | 0.157160567 | 0.828843049  | 0.407193225 | 0.57561067  |
| ENSG00000100867 | 195.5816881 | -0.697438262 | 0.13598996  | -5.128601117 | 2.92E-07    | 2.85E-06    |
| ENSG00000100883 | 336.7993479 | -0.01645669  | 0.107308871 | -0.153358152 | 0.878115845 | 0.932836215 |
| ENSG00000100888 | 1772.252687 | -0.148290538 | 0.067344899 | -2.201956488 | 0.027668382 | 0.075438231 |
| ENSG00000100889 | 523.0796959 | -0.837208711 | 0.09278841  | -9.022772508 | 1.83E-19    | 6.05E-18    |
| ENSG00000100890 | 65.36510658 | -0.38102075  | 0.218374605 | -1.744803385 | 0.081019099 | 0.178297868 |
| ENSG00000100897 | 160.5173401 | -0.27259193  | 0.143791871 | -1.895739508 | 0.057994498 | 0.136938766 |
| ENSG00000100902 | 100.8788806 | 0.308932004  | 0.2092346   | 1.476486219  | 0.139813412 | 0.27068438  |
| ENSG00000100906 | 250.8471193 | 0.367770638  | 0.119100846 | 3.087892746  | 0.002015812 | 0.008231428 |
| ENSG00000100908 | 66.14753012 | 0.571643239  | 0.236886553 | 2.413151917  | 0.015815226 | 0.047652613 |
| ENSG00000100911 | 514.4657819 | 0.287705703  | 0.105742655 | 2.720810273  | 0.006512213 | 0.022371497 |
| ENSG00000100916 | 119.8347415 | 0.176555222  | 0.166548528 | 1.060082754  | 0.289106953 | 0.459294885 |
| ENSG00000100918 | 28.00358117 | 0.734682547  | 0.35768591  | 2.053987941  | 0.039976859 | 0.101767839 |
| ENSG00000100926 | 36.19574501 | -0.023135335 | 0.286881575 | -0.080644198 | 0.935724916 | 0.964731953 |
| ENSG00000100934 | 717.8434612 | -0.471755744 | 0.090519991 | -5.211619419 | 1.87E-07    | 1.89E-06    |
| ENSG00000100938 | 220.8680367 | -0.223639628 | 0.124772598 | -1.79237775  | 0.073072476 | 0.164179315 |
| ENSG00000100941 | 2724.119729 | 0.076719458  | 0.059434943 | 1.290814018  | 0.196768176 | 0.347995448 |
| ENSG00000100949 | 203.46094   | 0.330115302  | 0.14442856  | 2.285664991  | 0.022273865 | 0.062890649 |
| ENSG00000100968 | 321.4991799 | 0.239986011  | 0.107411476 | 2.234267888  | 0.025465452 | 0.070402126 |
| ENSG00000100979 | 970.6198218 | 0.068304671  | 0.07448415  | 0.91703632   | 0.359123608 | 0.530453136 |
| ENSG00000100982 | 224.2285294 | -0.234788949 | 0.132199171 | -1.776024362 | 0.075728902 | 0.168797824 |
| ENSG00000100983 | 339.9187865 | 0.209108605  | 0.10715736  | 1.951416177  | 0.051007559 | 0.123705659 |
| ENSG00000100991 | 425.8565891 | 0.096062742  | 0.100675519 | 0.954181735  | 0.339991659 | 0.511717865 |
| ENSG00000100994 | 254.9892398 | -0.075116395 | 0.131886491 | -0.569553371 | 0.568980662 | 0.71437892  |
| ENSG00000100997 | 273.0140869 | 0.320981927  | 0.120187714 | 2.670671698  | 0.007569965 | 0.025524554 |
| ENSG00000101000 | 384.2248305 | 0.844848688  | 0.10313101  | 8.191994735  | 2.57E-16    | 6.82E-15    |
| ENSG00000101003 | 208.8161641 | -0.58370819  | 0.141267571 | -4.131933365 | 3.60E-05    | 0.000228645 |
| ENSG00000101004 | 411.2047777 | 0.010171912  | 0.111743891 | 0.091028796  | 0.92746971  | 0.960497968 |
| ENSG00000101017 | 63.731405   | -1.083369838 | 0.234844473 | -4.613137462 | 3.97E-06    | 3.10E-05    |
| ENSG00000101019 | 159.724212  | -0.032011581 | 0.143132554 | -0.223649897 | 0.823029735 | 0.896348169 |
| ENSG00000101040 | 1143.651383 | -0.57297482  | 0.071792948 | -7.980934589 | 1.45E-15    | 3.67E-14    |
| ENSG00000101052 | 61.16942561 | -0.267577054 | 0.228765265 | -1.169657698 | 0.242138748 | 0.404832326 |
| ENSG00000101057 | 709.3222984 | -0.11378193  | 0.086260453 | -1.319050923 | 0.187152089 | 0.335450478 |
| ENSG00000101079 | 238.1481027 | 0.525479438  | 0.127734163 | 4.113851971  | 3.89E-05    | 0.000245325 |
| ENSG00000101084 | 66.05556113 | 0.274535855  | 0.215345356 | 1.27486313   | 0.202357691 | 0.355004182 |
| ENSG00000101096 | 229.119004  | -1.319382001 | 0.135840034 | -9.712762571 | 2.66E-22    | 1.02E-20    |
| ENSG00000101098 | 66.85806433 | -0.943298976 | 0.229838263 | -4.104185982 | 4.06E-05    | 0.000254895 |
| ENSG00000101104 | 502.0671507 | 0.389280921  | 0.102842764 | 3.785204774  | 0.000153582 | 0.00084669  |
| ENSG00000101109 | 595.1329706 | 0.129301579  | 0.090045764 | 1.435954047  | 0.151015418 | 0.28658654  |

|                 |             |              |             |              |             |             |
|-----------------|-------------|--------------|-------------|--------------|-------------|-------------|
| ENSG00000101115 | 929.5383262 | -2.050805457 | 0.082755625 | -24.78146283 | 1.42E-135   | 6.24E-133   |
| ENSG00000101126 | 1023.025747 | 0.021251196  | 0.07793104  | 0.272692319  | 0.78508974  | 0.871377653 |
| ENSG00000101132 | 132.6779163 | 0.134001722  | 0.160028779 | 0.837360148  | 0.402390159 | 0.570658715 |
| ENSG00000101138 | 270.0806948 | -0.001227246 | 0.114929477 | -0.010678254 | 0.991480148 | 0.995624671 |
| ENSG00000101144 | 609.0159259 | -0.104269843 | 0.086689583 | -1.202795538 | 0.229055452 | 0.387861666 |
| ENSG00000101146 | 258.7077105 | 0.071532034  | 0.122727669 | 0.582851727  | 0.55999312  | 0.706631635 |
| ENSG00000101150 | 526.0330351 | 0.453788493  | 0.087911487 | 5.161879391  | 2.44E-07    | 2.43E-06    |
| ENSG00000101152 | 218.2350806 | 0.062682042  | 0.126755593 | 0.494511052  | 0.620945303 | 0.753988302 |
| ENSG00000101158 | 928.9389686 | 0.067416891  | 0.097685528 | 0.690142054  | 0.490104859 | 0.649726591 |
| ENSG00000101160 | 1113.643945 | -0.086380256 | 0.070987419 | -1.21683895  | 0.223665497 | 0.382038284 |
| ENSG00000101161 | 756.9710459 | 0.317466421  | 0.078976443 | 4.019760945  | 5.83E-05    | 0.000352429 |
| ENSG00000101166 | 723.6203969 | -0.348517659 | 0.079978218 | -4.357657227 | 1.31E-05    | 9.18E-05    |
| ENSG00000101181 | 174.5885916 | 0.114042284  | 0.14398372  | 0.792049852  | 0.428331609 | 0.595484374 |
| ENSG00000101182 | 521.0789189 | 0.353621955  | 0.093034387 | 3.800981214  | 0.000144124 | 0.000799571 |
| ENSG00000101187 | 213.8277946 | 0.369814988  | 0.135345182 | 2.732383843  | 0.006287784 | 0.021696021 |
| ENSG00000101189 | 265.4334806 | 0.357480514  | 0.123777655 | 2.888086021  | 0.003875939 | 0.014392099 |
| ENSG00000101190 | 95.70138249 | 0.278650763  | 0.181207862 | 1.537741022  | 0.124111949 | 0.248159578 |
| ENSG00000101191 | 902.8472072 | -0.222913857 | 0.080939787 | -2.754070217 | 0.005885914 | 0.020551686 |
| ENSG00000101193 | 305.2306013 | -0.02017598  | 0.111186864 | -0.181460104 | 0.856006446 | 0.917537012 |
| ENSG00000101199 | 437.1188694 | 0.199000229  | 0.118429945 | 1.680320202  | 0.092895033 | 0.198222167 |
| ENSG00000101204 | 15.24596622 | -2.471932399 | 0.577363285 | -4.281415987 | 1.86E-05    | 0.000125476 |
| ENSG00000101210 | 2481.83688  | 0.592573902  | 0.065433696 | 9.056097059  | 1.35E-19    | 4.48E-18    |
| ENSG00000101216 | 114.5665565 | 0.319751179  | 0.167789917 | 1.905663843  | 0.056693833 | 0.134614313 |
| ENSG00000101220 | 112.1744457 | 0.241689124  | 0.18109867  | 1.334571501  | 0.182016631 | 0.328804991 |
| ENSG00000101224 | 686.2989809 | 0.225166548  | 0.081354663 | 2.767715319  | 0.005645074 | 0.019804285 |
| ENSG00000101236 | 99.50382945 | 0.623194157  | 0.181725202 | 3.429321575  | 0.000605092 | 0.002873472 |
| ENSG00000101246 | 121.5663628 | -0.38436672  | 0.173523656 | -2.215068129 | 0.026755389 | 0.073433557 |
| ENSG00000101247 | 197.438892  | 0.058558071  | 0.133059638 | 0.440088907  | 0.659872716 | 0.782521221 |
| ENSG00000101255 | 169.8439223 | -0.215742265 | 0.151799501 | -1.421231711 | 0.155249409 | 0.292709201 |
| ENSG00000101265 | 11.83550395 | 0.796475913  | 0.505513039 | 1.575579366  | 0.115122774 | 0.233988755 |
| ENSG00000101266 | 1554.796634 | -0.085759216 | 0.067432725 | -1.271774444 | 0.203453272 | 0.356436531 |
| ENSG00000101290 | 638.3317056 | -0.470683148 | 0.085731284 | -5.490214612 | 4.01E-08    | 4.52E-07    |
| ENSG00000101294 | 778.4176549 | 0.458865312  | 0.077644886 | 5.909794404  | 3.43E-09    | 4.44E-08    |
| ENSG00000101298 | 68.91474938 | -0.754540755 | 0.214985025 | -3.509736335 | 0.000448551 | 0.002198465 |
| ENSG00000101310 | 498.4314531 | 0.299516447  | 0.100761034 | 2.972542414  | 0.002953444 | 0.011378779 |
| ENSG00000101311 | 244.9221655 | 0.539128087  | 0.129731086 | 4.155735548  | 3.24E-05    | 0.00020826  |
| ENSG00000101335 | 2800.851227 | -0.173190285 | 0.073720926 | -2.349268984 | 0.018810313 | 0.054898912 |
| ENSG00000101337 | 702.8515043 | 0.060776449  | 0.080188381 | 0.757920891  | 0.448498343 | 0.613502407 |
| ENSG00000101343 | 233.3704214 | 0.316335558  | 0.123940042 | 2.552327342  | 0.010700593 | 0.034130616 |
| ENSG00000101346 | 475.0356601 | 0.438490456  | 0.091495423 | 4.792485159  | 1.65E-06    | 1.39E-05    |
| ENSG00000101347 | 252.2224434 | 0.786885211  | 0.119996531 | 6.557566299  | 5.47E-11    | 8.99E-10    |
| ENSG00000101350 | 224.7029821 | -0.033025107 | 0.125592383 | -0.262954699 | 0.792585496 | 0.876311364 |
| ENSG00000101353 | 12.09308813 | 0.029013432  | 0.493972303 | 0.058734937  | 0.953163232 | 0.974299858 |
| ENSG00000101361 | 1207.82474  | 0.17363579   | 0.07264758  | 2.39011115   | 0.016843275 | 0.050158465 |
| ENSG00000101363 | 288.5518704 | 0.318480739  | 0.116706125 | 2.728911957  | 0.006354367 | 0.021890896 |
| ENSG00000101365 | 928.882202  | -0.172647349 | 0.090417094 | -1.909454737 | 0.056203455 | 0.133653282 |
| ENSG00000101367 | 850.6064833 | -0.348288859 | 0.079699499 | -4.370025728 | 1.24E-05    | 8.72E-05    |
| ENSG00000101384 | 8.810961642 | -3.989728563 | 0.973975687 | -4.096332812 | 4.20E-05    | 0.000262753 |
| ENSG00000101391 | 189.7165311 | 0.071569714  | 0.135166758 | 0.52949198   | 0.596464206 | 0.73589786  |
| ENSG00000101400 | 98.20540556 | 0.014166918  | 0.189416398 | 0.074792457  | 0.940379844 | 0.967234068 |

|                 |             |              |             |              |             |             |
|-----------------|-------------|--------------|-------------|--------------|-------------|-------------|
| ENSG00000101407 | 383.8760941 | -0.055141847 | 0.105374973 | -0.523291682 | 0.600771289 | 0.739163904 |
| ENSG00000101412 | 175.2261135 | -0.426708802 | 0.148132631 | -2.880586123 | 0.003969365 | 0.014715669 |
| ENSG00000101413 | 283.4975868 | -0.034178358 | 0.111520257 | -0.306476679 | 0.759241734 | 0.854860493 |
| ENSG00000101417 | 38.57418238 | -0.33077989  | 0.284533954 | -1.162532221 | 0.245019344 | 0.408472197 |
| ENSG00000101421 | 280.709625  | 0.261580619  | 0.112965282 | 2.31558417   | 0.020580984 | 0.059157168 |
| ENSG00000101439 | 1205.803477 | 0.523801667  | 0.070570269 | 7.422412805  | 1.15E-13    | 2.51E-12    |
| ENSG00000101442 | 29.4053182  | 0.646497198  | 0.322451873 | 2.004941672  | 0.044969283 | 0.112174629 |
| ENSG00000101443 | 28.12976051 | -5.703544478 | 0.87941954  | -6.48557852  | 8.84E-11    | 1.41E-09    |
| ENSG00000101444 | 1245.164553 | -0.372539863 | 0.073149196 | -5.092877075 | 3.53E-07    | 3.41E-06    |
| ENSG00000101447 | 166.9130984 | -0.087323875 | 0.151726365 | -0.575535275 | 0.564929341 | 0.710817131 |
| ENSG00000101452 | 109.6890528 | 0.107012524  | 0.173871359 | 0.615469532  | 0.538244684 | 0.688933648 |
| ENSG00000101457 | 162.5412345 | 0.180200156  | 0.158101569 | 1.139774622  | 0.254380209 | 0.41939892  |
| ENSG00000101460 | 19.94018689 | 0.578679359  | 0.386320317 | 1.497926292  | 0.134152402 | 0.262749413 |
| ENSG00000101464 | 139.4177723 | 0.215834585  | 0.153217631 | 1.408679816  | 0.158929866 | 0.297506373 |
| ENSG00000101473 | 34.39388045 | -0.125237801 | 0.296101152 | -0.422956142 | 0.67232726  | 0.791168721 |
| ENSG00000101474 | 525.8284375 | 0.563431094  | 0.088110331 | 6.394608786  | 1.61E-10    | 2.47E-09    |
| ENSG00000101493 | 1251.028976 | -0.424907693 | 0.077525572 | -5.480871433 | 4.23E-08    | 4.74E-07    |
| ENSG00000101544 | 575.0421719 | -0.104858191 | 0.091517299 | -1.145774538 | 0.251888453 | 0.416463877 |
| ENSG00000101546 | 93.51103873 | 0.56314377   | 0.18984271  | 2.966370262  | 0.003013375 | 0.011584257 |
| ENSG00000101557 | 325.5450026 | 0.170758279  | 0.104744578 | 1.630235025  | 0.103051834 | 0.214677312 |
| ENSG00000101558 | 526.0795647 | 0.119948083  | 0.089545528 | 1.339520631  | 0.180401243 | 0.326642983 |
| ENSG00000101574 | 60.9634249  | -0.405557629 | 0.230456888 | -1.759798258 | 0.078442019 | 0.173879601 |
| ENSG00000101577 | 329.5329016 | 0.047437415  | 0.116639868 | 0.406699837  | 0.684228461 | 0.800412824 |
| ENSG00000101596 | 1356.049514 | -0.002359168 | 0.06538326  | -0.036082147 | 0.971216858 | 0.985031278 |
| ENSG00000101605 | 19.66693734 | -1.157320945 | 0.414463094 | -2.792337756 | 0.00523287  | 0.018604436 |
| ENSG00000101608 | 465.3557463 | -0.451360286 | 0.092375998 | -4.886120786 | 1.03E-06    | 9.09E-06    |
| ENSG00000101624 | 98.49652138 | 0.077680937  | 0.178607733 | 0.434924823  | 0.663616996 | 0.784929938 |
| ENSG00000101639 | 640.168336  | -0.276613802 | 0.083647653 | -3.306892578 | 0.000943371 | 0.004266534 |
| ENSG00000101654 | 322.4106096 | 0.325612781  | 0.106454411 | 3.058706319  | 0.00222295  | 0.008939528 |
| ENSG00000101665 | 63.22432317 | -0.299468541 | 0.230507735 | -1.299169159 | 0.193885883 | 0.34476587  |
| ENSG00000101670 | 563.9427189 | 0.20245169   | 0.088031855 | 2.299754898  | 0.02146211  | 0.061163822 |
| ENSG00000101695 | 36.86680795 | 0.335210122  | 0.286646725 | 1.169418986  | 0.242234864 | 0.404918311 |
| ENSG00000101745 | 607.0740451 | -0.021761035 | 0.09527621  | -0.228399465 | 0.819335706 | 0.893395096 |
| ENSG00000101751 | 117.4768721 | -0.234779948 | 0.165383057 | -1.41961306  | 0.155720361 | 0.293217683 |
| ENSG00000101752 | 1087.49427  | -0.175638146 | 0.078156069 | -2.247274577 | 0.024622485 | 0.068421769 |
| ENSG00000101773 | 325.2361792 | 0.138723032  | 0.109514777 | 1.266706064  | 0.205260411 | 0.358682061 |
| ENSG00000101782 | 115.7812073 | -0.394323383 | 0.181952205 | -2.167181121 | 0.030221046 | 0.08101432  |
| ENSG00000101811 | 213.6644985 | 0.128167729  | 0.132326189 | 0.968574175  | 0.332757693 | 0.505081442 |
| ENSG00000101843 | 86.48399765 | 0.081763978  | 0.193407899 | 0.422754076  | 0.672474697 | 0.791275931 |
| ENSG00000101844 | 23.83301539 | -0.516422723 | 0.364070706 | -1.41846821  | 0.156054113 | 0.293649314 |
| ENSG00000101846 | 72.92392096 | 0.980345144  | 0.209825344 | 4.672196062  | 2.98E-06    | 2.39E-05    |
| ENSG00000101849 | 587.6365915 | 0.11664028   | 0.087902644 | 1.326925725  | 0.184533254 | 0.33202749  |
| ENSG00000101856 | 1302.324937 | -2.119978822 | 0.074678837 | -28.38794647 | 2.85E-177   | 2.11E-174   |
| ENSG00000101868 | 409.8730341 | -0.11873011  | 0.097709315 | -1.215136035 | 0.224314212 | 0.382628019 |
| ENSG00000101871 | 139.7396145 | -1.974661144 | 0.190890279 | -10.34448246 | 4.43E-25    | 1.99E-23    |
| ENSG00000101882 | 157.5430231 | 0.171691715  | 0.151659367 | 1.132087768  | 0.257597537 | 0.423361718 |
| ENSG00000101888 | 20.77565634 | -0.243484012 | 0.395390008 | -0.615807194 | 0.538021779 | 0.688744366 |
| ENSG00000101901 | 246.3856674 | -0.076683344 | 0.125588987 | -0.610589717 | 0.541471232 | 0.691142874 |
| ENSG00000101911 | 342.9709793 | 0.196552277  | 0.106212563 | 1.850555812  | 0.064233482 | 0.14874509  |
| ENSG00000101928 | 48.55322115 | -0.533445253 | 0.256349594 | -2.080928799 | 0.037440424 | 0.096517826 |

|                 |             |              |             |              |             |             |
|-----------------|-------------|--------------|-------------|--------------|-------------|-------------|
| ENSG00000101935 | 150.8974326 | 0.288015012  | 0.15529202  | 1.854667171  | 0.06364377  | 0.147574122 |
| ENSG00000101938 | 13.44489444 | -1.507303418 | 0.503719089 | -2.992349211 | 0.002768394 | 0.010780579 |
| ENSG00000101940 | 367.0803919 | -0.265931389 | 0.106043119 | -2.507766571 | 0.01214969  | 0.038052775 |
| ENSG00000101945 | 145.6051107 | -0.163119016 | 0.15549264  | -1.049046537 | 0.2941567   | 0.464428366 |
| ENSG00000101955 | 43.83734744 | 0.493577632  | 0.271630865 | 1.817089645  | 0.069203388 | 0.157706034 |
| ENSG00000101966 | 372.3892931 | 0.004518083  | 0.106162065 | 0.042558358  | 0.966053591 | 0.982419083 |
| ENSG00000101972 | 1386.751524 | 0.382037182  | 0.066466793 | 5.74779018   | 9.04E-09    | 1.11E-07    |
| ENSG00000101974 | 402.3065368 | 0.137144327  | 0.098365908 | 1.394226204  | 0.163249307 | 0.30356937  |
| ENSG00000101986 | 324.6192835 | 1.975367281  | 0.119386692 | 16.54595881  | 1.71E-61    | 2.31E-59    |
| ENSG00000101997 | 57.96961184 | 0.767534251  | 0.239079837 | 3.210367978  | 0.001325651 | 0.00573673  |
| ENSG00000102003 | 63.83604683 | 0.288915805  | 0.217307024 | 1.32952815   | 0.183673785 | 0.330989821 |
| ENSG00000102007 | 870.7115775 | 0.204636669  | 0.085319551 | 2.398473337  | 0.016463575 | 0.049257474 |
| ENSG00000102024 | 337.9588604 | 0.118999292  | 0.112824669 | 1.054727599  | 0.291549925 | 0.462078506 |
| ENSG00000102030 | 242.0893515 | 0.340300008  | 0.125998684 | 2.700821926  | 0.006916836 | 0.023542718 |
| ENSG00000102032 | 20.46337354 | 1.49649529   | 0.409289464 | 3.656324977  | 0.000255857 | 0.001333094 |
| ENSG00000102034 | 96.0374641  | -0.802319964 | 0.185182011 | -4.332602076 | 1.47E-05    | 0.000101867 |
| ENSG00000102038 | 1156.083016 | -0.063585574 | 0.073504181 | -0.865060635 | 0.387005509 | 0.555798629 |
| ENSG00000102053 | 104.9958477 | 0.196683642  | 0.173155007 | 1.135881919  | 0.256005987 | 0.421535118 |
| ENSG00000102054 | 899.7426582 | 0.460853725  | 0.079502614 | 5.79671163   | 6.76E-09    | 8.54E-08    |
| ENSG00000102057 | 31.72535128 | 0.084579169  | 0.311874753 | 0.271195948  | 0.786240329 | 0.872090054 |
| ENSG00000102078 | 21.08984104 | -0.338175199 | 0.383677176 | -0.881405565 | 0.378098346 | 0.547434005 |
| ENSG00000102081 | 362.5970583 | 0.235030395  | 0.107321417 | 2.189967303  | 0.028526608 | 0.077298084 |
| ENSG00000102096 | 164.4525233 | 0.373895936  | 0.141252692 | 2.647000437  | 0.008120925 | 0.02710255  |
| ENSG00000102098 | 271.79768   | 0.132658999  | 0.122560206 | 1.082398631  | 0.279075436 | 0.447809167 |
| ENSG00000102100 | 69.36716477 | 0.379795733  | 0.211052771 | 1.799529718  | 0.071934927 | 0.162246295 |
| ENSG00000102103 | 276.3491664 | 0.288281885  | 0.123590882 | 2.332549785  | 0.019671787 | 0.057022202 |
| ENSG00000102109 | 151.8741145 | 0.46586582   | 0.146550589 | 3.178873752  | 0.001478485 | 0.006316385 |
| ENSG00000102119 | 240.0890255 | 0.279453272  | 0.132967663 | 2.101663405  | 0.035582771 | 0.092681474 |
| ENSG00000102125 | 69.50743948 | -0.053512046 | 0.21330198  | -0.250874587 | 0.801911073 | 0.88203311  |
| ENSG00000102144 | 2160.330139 | 0.39756979   | 0.070743005 | 5.619916645  | 1.91E-08    | 2.25E-07    |
| ENSG00000102158 | 226.9044529 | 0.1123741    | 0.137649306 | 0.81637971   | 0.414282997 | 0.582467547 |
| ENSG00000102172 | 276.7602139 | -0.225787937 | 0.113181001 | -1.994927904 | 0.046050744 | 0.114268644 |
| ENSG00000102178 | 248.3704666 | 0.262621906  | 0.126344452 | 2.078618419  | 0.037652437 | 0.097010964 |
| ENSG00000102181 | 179.5070034 | -0.472596656 | 0.138034061 | -3.423768389 | 0.000617592 | 0.002923936 |
| ENSG00000102189 | 781.9042044 | 0.041297381  | 0.080883795 | 0.510576703  | 0.609647492 | 0.745903521 |
| ENSG00000102218 | 45.01390432 | 0.139121085  | 0.26405735  | 0.526859353  | 0.598291262 | 0.737311593 |
| ENSG00000102221 | 116.484435  | 0.202766225  | 0.175929377 | 1.152543305  | 0.249097885 | 0.413244404 |
| ENSG00000102225 | 1140.909825 | -0.012605209 | 0.06911217  | -0.182387688 | 0.855278487 | 0.916966639 |
| ENSG00000102226 | 544.7645459 | -0.300031012 | 0.088779641 | -3.379502407 | 0.000726172 | 0.00337766  |
| ENSG00000102230 | 175.2920891 | 0.223830331  | 0.145078438 | 1.54282286   | 0.122873761 | 0.246466903 |
| ENSG00000102241 | 948.8441641 | 0.106512115  | 0.07310826  | 1.456909454  | 0.145141376 | 0.27825862  |
| ENSG00000102265 | 5508.241773 | 0.263411503  | 0.080600871 | 3.268097467  | 0.001082731 | 0.00482064  |
| ENSG00000102290 | 58.23498276 | 0.317402811  | 0.238600958 | 1.330266293  | 0.183430549 | 0.330678763 |
| ENSG00000102302 | 597.6710883 | 0.233989313  | 0.085445131 | 2.738474514  | 0.006172494 | 0.021355919 |
| ENSG00000102309 | 148.5736838 | 0.034825384  | 0.151691214 | 0.22958076   | 0.818417559 | 0.892848047 |
| ENSG00000102312 | 111.8411151 | 0.266773398  | 0.166356865 | 1.603621216  | 0.108797571 | 0.223989372 |
| ENSG00000102316 | 518.7825368 | -0.234411192 | 0.089788502 | -2.610703904 | 0.009035609 | 0.029624164 |
| ENSG00000102317 | 692.2174643 | 0.050067533  | 0.082151089 | 0.609456714  | 0.542221756 | 0.691581745 |
| ENSG00000102349 | 127.1462229 | -0.168476958 | 0.162027501 | -1.039804705 | 0.298430643 | 0.469014907 |
| ENSG00000102362 | 24.72955569 | -0.421772696 | 0.355691538 | -1.185782205 | 0.235708321 | 0.396763904 |



|                 |             |              |             |              |             |             |
|-----------------|-------------|--------------|-------------|--------------|-------------|-------------|
| ENSG00000102383 | 18.65259632 | -5.104978766 | 0.909268478 | -5.614380008 | 1.97E-08    | 2.32E-07    |
| ENSG00000102384 | 128.1849304 | 0.21524142   | 0.167553608 | 1.284612266  | 0.19892781  | 0.350695149 |
| ENSG00000102385 | 316.7298459 | 3.953406694  | 0.161688619 | 24.45074185  | 4.94E-132   | 1.98E-129   |
| ENSG00000102390 | 156.2569707 | -0.574521304 | 0.15399113  | -3.730872699 | 0.000190818 | 0.001025015 |
| ENSG00000102393 | 204.7125961 | 0.581240277  | 0.128506825 | 4.523030415  | 6.10E-06    | 4.59E-05    |
| ENSG00000102401 | 163.8952965 | 0.059693101  | 0.1622383   | 0.367934707  | 0.71292192  | 0.820852564 |
| ENSG00000102409 | 245.216285  | -1.364326035 | 0.128198008 | -10.64233414 | 1.89E-26    | 8.98E-25    |
| ENSG00000102471 | 187.9147094 | -0.257400124 | 0.137503479 | -1.871953535 | 0.061213032 | 0.143160932 |
| ENSG00000102531 | 635.785593  | 0.219733067  | 0.087969161 | 2.497842008  | 0.012495187 | 0.038987092 |
| ENSG00000102543 | 28.64565637 | 0.146713495  | 0.318841969 | 0.460144866  | 0.645412242 | 0.771714825 |
| ENSG00000102547 | 47.51467376 | 0.196645449  | 0.252407403 | 0.779079563  | 0.435932848 | 0.602000464 |
| ENSG00000102572 | 1079.729955 | -0.075884442 | 0.072255571 | -1.05022271  | 0.293615731 | 0.463987641 |
| ENSG00000102580 | 237.3662557 | -0.103852829 | 0.120775431 | -0.859883735 | 0.389853135 | 0.558214797 |
| ENSG00000102595 | 229.8631201 | -0.048826047 | 0.133761282 | -0.365023766 | 0.715093666 | 0.822477747 |
| ENSG00000102606 | 418.0892636 | -0.042070026 | 0.0967066   | -0.435027456 | 0.663542499 | 0.784907914 |
| ENSG00000102678 | 27.69385247 | 4.927403811  | 0.648602104 | 7.596959337  | 3.03E-14    | 6.95E-13    |
| ENSG00000102699 | 780.8188794 | 0.072069297  | 0.079323716 | 0.908546654  | 0.363589477 | 0.534581748 |
| ENSG00000102710 | 503.0695209 | -0.07049252  | 0.093280715 | -0.755703039 | 0.449827262 | 0.614901085 |
| ENSG00000102738 | 126.5485584 | 0.152781103  | 0.16810416  | 0.90884784   | 0.36343045  | 0.534510264 |
| ENSG00000102743 | 142.401569  | -0.481145217 | 0.157844062 | -3.048231335 | 0.002301926 | 0.009209673 |
| ENSG00000102753 | 270.3132845 | -0.16406283  | 0.11985104  | -1.368889498 | 0.171033819 | 0.314052555 |
| ENSG00000102763 | 693.475181  | -0.070279236 | 0.089224475 | -0.787667691 | 0.430891109 | 0.597477385 |
| ENSG00000102780 | 712.4977967 | -0.138122265 | 0.083644806 | -1.651295178 | 0.098678316 | 0.207534086 |
| ENSG00000102781 | 84.27649581 | -0.616221621 | 0.199692705 | -3.085849439 | 0.002029716 | 0.008273771 |
| ENSG00000102786 | 560.4642561 | 0.228498984  | 0.089960239 | 2.539999751  | 0.011085255 | 0.035205646 |
| ENSG00000102796 | 16.94784907 | -0.112212415 | 0.432029575 | -0.259733179 | 0.795069597 | 0.87776105  |
| ENSG00000102804 | 753.7678413 | -0.107551428 | 0.0830734   | -1.294655428 | 0.195439122 | 0.346545487 |
| ENSG00000102805 | 51.68739109 | 0.067164854  | 0.245653066 | 0.273413458  | 0.784535408 | 0.871011269 |
| ENSG00000102858 | 715.9215559 | -0.074961138 | 0.080950108 | -0.926016534 | 0.354437388 | 0.525826821 |
| ENSG00000102870 | 587.098876  | -0.138544238 | 0.09702566  | -1.427913375 | 0.153316794 | 0.28985747  |
| ENSG00000102871 | 33.37352202 | 0.341016552  | 0.315286192 | 1.081609536  | 0.279426065 | 0.448121697 |
| ENSG00000102878 | 14.30893349 | 0.434225872  | 0.459759421 | 0.94446324   | 0.344932978 | 0.516663846 |
| ENSG00000102879 | 26.01081971 | -0.046886343 | 0.372554132 | -0.125851088 | 0.899849801 | 0.945967201 |
| ENSG00000102882 | 370.9551384 | 0.920435803  | 0.104252287 | 8.828926692  | 1.06E-18    | 3.37E-17    |
| ENSG00000102886 | 13.89389844 | 1.311740149  | 0.50276195  | 2.609068067  | 0.009078918 | 0.029741503 |
| ENSG00000102890 | 19.51502501 | 0.216928288  | 0.394959917 | 0.549241275  | 0.582839882 | 0.724975811 |
| ENSG00000102893 | 299.6381365 | -0.050011964 | 0.113493094 | -0.440660853 | 0.659458541 | 0.782184761 |
| ENSG00000102897 | 124.2541579 | -0.148807991 | 0.171971909 | -0.86530406  | 0.386871923 | 0.555720411 |
| ENSG00000102898 | 1104.293353 | 0.287435191  | 0.088438986 | 3.250095953  | 0.001153661 | 0.005086463 |
| ENSG00000102900 | 425.501054  | 0.069587183  | 0.096740086 | 0.719321079  | 0.471943111 | 0.633818202 |
| ENSG00000102901 | 154.3042293 | 0.022987383  | 0.149858525 | 0.153393897  | 0.878087657 | 0.932836215 |
| ENSG00000102908 | 1912.783077 | -0.235129669 | 0.070551023 | -3.332760573 | 0.000859889 | 0.003921708 |
| ENSG00000102910 | 799.6281451 | 0.208175286  | 0.076665022 | 2.715388055  | 0.006619815 | 0.022687934 |
| ENSG00000102921 | 368.2896936 | -0.021139688 | 0.10562519  | -0.200138698 | 0.841372109 | 0.907808128 |
| ENSG00000102931 | 335.6057467 | 0.271012019  | 0.104726791 | 2.587800277  | 0.009659097 | 0.031356906 |
| ENSG00000102934 | 34.07722246 | -0.156061687 | 0.300522858 | -0.519300553 | 0.603551167 | 0.741285586 |
| ENSG00000102935 | 220.2474972 | -0.302944057 | 0.136882007 | -2.213176611 | 0.026885472 | 0.073732961 |
| ENSG00000102967 | 142.6616766 | 0.792661524  | 0.158260434 | 5.008589334  | 5.48E-07    | 5.15E-06    |
| ENSG00000102974 | 855.4651849 | 0.110138913  | 0.076191122 | 1.44556099   | 0.148300375 | 0.282483689 |
| ENSG00000102977 | 323.5991043 | 0.599954702  | 0.111216037 | 5.394498126  | 6.87E-08    | 7.42E-07    |

|                 |             |              |             |              |             |             |
|-----------------|-------------|--------------|-------------|--------------|-------------|-------------|
| ENSG00000102978 | 350.3619381 | 0.433680673  | 0.107762615 | 4.024407486  | 5.71E-05    | 0.000346288 |
| ENSG00000102981 | 86.87555726 | 0.399872095  | 0.190403256 | 2.100132653  | 0.035717174 | 0.092979825 |
| ENSG00000102984 | 25.3821319  | 0.471847845  | 0.351118797 | 1.343841028  | 0.178999799 | 0.324901173 |
| ENSG00000102996 | 47.26776378 | -1.36391414  | 0.275128183 | -4.957377043 | 7.15E-07    | 6.53E-06    |
| ENSG00000103005 | 170.9101153 | -0.215536974 | 0.143129978 | -1.505882815 | 0.132097259 | 0.259927795 |
| ENSG00000103018 | 757.4735875 | -0.014964504 | 0.081734355 | -0.183087072 | 0.8547297   | 0.916518175 |
| ENSG00000103021 | 84.63071545 | -0.183394732 | 0.205565274 | -0.892148407 | 0.372313392 | 0.54287242  |
| ENSG00000103024 | 166.2561053 | 0.104679792  | 0.143354791 | 0.73021481   | 0.465258891 | 0.62786931  |
| ENSG00000103034 | 62.95534767 | 0.789117609  | 0.227901188 | 3.462542755  | 0.000535097 | 0.002573265 |
| ENSG00000103035 | 743.8961429 | -0.262396804 | 0.101565332 | -2.583527253 | 0.009779574 | 0.031645629 |
| ENSG00000103037 | 64.26632438 | 0.473396812  | 0.233543266 | 2.027019744  | 0.042660394 | 0.107701599 |
| ENSG00000103042 | 133.6056943 | 0.31858814   | 0.154151844 | 2.066716367  | 0.038760888 | 0.099356605 |
| ENSG00000103043 | 179.773398  | -0.810524246 | 0.141864581 | -5.713365792 | 1.11E-08    | 1.35E-07    |
| ENSG00000103044 | 9.402133589 | -0.280842706 | 0.584718149 | -0.480304411 | 0.631010953 | 0.761038109 |
| ENSG00000103047 | 154.0214775 | 0.15015229   | 0.149000801 | 1.007728072  | 0.313585025 | 0.484803967 |
| ENSG00000103051 | 224.6955861 | -0.239192768 | 0.12449771  | -1.9212624   | 0.054698635 | 0.130894672 |
| ENSG00000103061 | 199.2247229 | 0.109865128  | 0.131188977 | 0.837457011  | 0.402335731 | 0.570658715 |
| ENSG00000103064 | 464.8160888 | 0.104943606  | 0.096882275 | 1.08320749   | 0.278716336 | 0.447443242 |
| ENSG00000103066 | 96.43093759 | 0.779208963  | 0.184521444 | 4.222863999  | 2.41E-05    | 0.000159154 |
| ENSG00000103091 | 468.5430717 | 0.416957299  | 0.094861675 | 4.395424152  | 1.11E-05    | 7.86E-05    |
| ENSG00000103111 | 251.1022061 | -0.148943532 | 0.120288398 | -1.238220271 | 0.215634397 | 0.371932266 |
| ENSG00000103121 | 74.25836421 | -0.178800421 | 0.211985199 | -0.843457096 | 0.398972851 | 0.567071906 |
| ENSG00000103126 | 452.9676912 | 0.374670081  | 0.092394725 | 4.055102519  | 5.01E-05    | 0.00030847  |
| ENSG00000103145 | 437.7811324 | -0.321566279 | 0.096301646 | -3.339156626 | 0.000840332 | 0.003846249 |
| ENSG00000103148 | 562.1939622 | 0.134224039  | 0.088278093 | 1.520468261  | 0.12839333  | 0.254091449 |
| ENSG00000103150 | 43.63083208 | -0.110710161 | 0.274793139 | -0.402885463 | 0.687032486 | 0.802690288 |
| ENSG00000103152 | 393.9906309 | 0.413937802  | 0.100230333 | 4.12986557   | 3.63E-05    | 0.000230398 |
| ENSG00000103160 | 142.7888066 | -0.012843859 | 0.159375788 | -0.080588522 | 0.935769195 | 0.964731953 |
| ENSG00000103168 | 194.2628438 | 0.093986444  | 0.141524697 | 0.664099242  | 0.506626796 | 0.663984568 |
| ENSG00000103174 | 45.40780409 | -0.173879801 | 0.260812125 | -0.666686034 | 0.504972702 | 0.662682319 |
| ENSG00000103175 | 66.57384075 | 0.673951742  | 0.223046815 | 3.021570794  | 0.002514668 | 0.0099363   |
| ENSG00000103184 | 64.60533078 | -0.854315439 | 0.231158903 | -3.695792931 | 0.000219202 | 0.001161058 |
| ENSG00000103187 | 769.9719647 | 0.693524746  | 0.091502745 | 7.579278081  | 3.47E-14    | 7.95E-13    |
| ENSG00000103194 | 532.1590604 | -0.049503972 | 0.092290564 | -0.536392559 | 0.591687273 | 0.732260534 |
| ENSG00000103197 | 745.2621552 | -0.003701217 | 0.08135677  | -0.045493657 | 0.96371383  | 0.981000042 |
| ENSG00000103199 | 86.06679746 | 0.090279376  | 0.20913052  | 0.431689146  | 0.665967357 | 0.786253443 |
| ENSG00000103202 | 3065.237015 | -0.136626358 | 0.062004745 | -2.203482318 | 0.027560772 | 0.075159418 |
| ENSG00000103222 | 695.6502633 | 0.095759769  | 0.080289494 | 1.192681179  | 0.232994259 | 0.39318481  |
| ENSG00000103227 | 99.76388204 | 0.0339529    | 0.18820691  | 0.180401985  | 0.856836996 | 0.918006963 |
| ENSG00000103245 | 73.94989993 | -0.10035903  | 0.207847845 | -0.482848546 | 0.629203278 | 0.759640606 |
| ENSG00000103248 | 76.05361807 | -0.421747167 | 0.208635431 | -2.021455157 | 0.04323267  | 0.108969911 |
| ENSG00000103249 | 496.674037  | 0.429405503  | 0.104600108 | 4.105210908  | 4.04E-05    | 0.000253881 |
| ENSG00000103253 | 106.147244  | 0.417858343  | 0.173499658 | 2.408410184  | 0.016022168 | 0.048172816 |
| ENSG00000103254 | 41.93436796 | 0.484795136  | 0.272141072 | 1.781411139  | 0.07484531  | 0.167199756 |
| ENSG00000103257 | 1049.650094 | -1.515171244 | 0.080521989 | -18.81686312 | 5.49E-79    | 9.77E-77    |
| ENSG00000103260 | 334.4694291 | 0.35480357   | 0.136942203 | 2.590900115  | 0.009572527 | 0.031111821 |
| ENSG00000103264 | 202.7347999 | -0.894913969 | 0.135239441 | -6.617255739 | 3.66E-11    | 6.11E-10    |
| ENSG00000103266 | 424.6266053 | 0.663606796  | 0.096388939 | 6.884677888  | 5.79E-12    | 1.05E-10    |
| ENSG00000103269 | 29.37332022 | -0.073738542 | 0.315616574 | -0.233633303 | 0.815269671 | 0.891560379 |
| ENSG00000103274 | 90.4661196  | -0.3521187   | 0.186171184 | -1.891370572 | 0.058574894 | 0.137984494 |

|                 |             |              |             |              |             |             |
|-----------------|-------------|--------------|-------------|--------------|-------------|-------------|
| ENSG00000103275 | 1000.194603 | -0.058853123 | 0.085621359 | -0.687364974 | 0.491852764 | 0.651295106 |
| ENSG00000103319 | 547.5472369 | -0.031656093 | 0.087022447 | -0.363769278 | 0.716030306 | 0.823285398 |
| ENSG00000103326 | 462.2382257 | 0.050937643  | 0.103636133 | 0.491504666  | 0.623069553 | 0.755351515 |
| ENSG00000103335 | 715.3529369 | -0.63858798  | 0.082967649 | -7.696831067 | 1.39E-14    | 3.27E-13    |
| ENSG00000103342 | 1550.395493 | -0.024315991 | 0.064453152 | -0.377266128 | 0.705975841 | 0.815529823 |
| ENSG00000103343 | 103.2875441 | 0.116048229  | 0.176638999 | 0.656979659  | 0.511193996 | 0.667447979 |
| ENSG00000103351 | 181.345661  | 0.123690097  | 0.138096017 | 0.895681858  | 0.370422702 | 0.541536387 |
| ENSG00000103353 | 466.8306462 | 0.126037123  | 0.095394968 | 1.321213533  | 0.186430175 | 0.334626204 |
| ENSG00000103356 | 398.9900681 | -0.167420481 | 0.097916799 | -1.709823872 | 0.087298447 | 0.188774829 |
| ENSG00000103363 | 927.8293365 | 0.326153173  | 0.086883808 | 3.753900519  | 0.000174104 | 0.000944627 |
| ENSG00000103365 | 715.0541996 | 0.116647189  | 0.079441822 | 1.468334763  | 0.142013313 | 0.273777723 |
| ENSG00000103404 | 247.850698  | -0.161119551 | 0.122447074 | -1.315830146 | 0.188231059 | 0.336954464 |
| ENSG00000103415 | 480.5940919 | 0.183579985  | 0.094629369 | 1.939989536  | 0.052380962 | 0.126512271 |
| ENSG00000103423 | 862.3784568 | 0.313887518  | 0.074678287 | 4.203196529  | 2.63E-05    | 0.000172424 |
| ENSG00000103429 | 292.6713765 | -0.191391671 | 0.118652551 | -1.613043034 | 0.106735159 | 0.220746286 |
| ENSG00000103479 | 267.092125  | -0.691569016 | 0.120238222 | -5.751657041 | 8.84E-09    | 1.09E-07    |
| ENSG00000103485 | 2392.669451 | 0.047352619  | 0.065104526 | 0.72733221   | 0.467022471 | 0.629196354 |
| ENSG00000103494 | 242.6002626 | -0.038059226 | 0.122314318 | -0.311159206 | 0.755679593 | 0.852102835 |
| ENSG00000103495 | 1483.109728 | 0.017080734  | 0.069672524 | 0.245157387  | 0.80633457  | 0.885511821 |
| ENSG00000103496 | 298.9416707 | 0.533023861  | 0.123233264 | 4.325324543  | 1.52E-05    | 0.000104927 |
| ENSG00000103502 | 368.2311072 | 0.140897827  | 0.106667318 | 1.32090907   | 0.186531685 | 0.334722864 |
| ENSG00000103507 | 777.917067  | 0.806329459  | 0.080949281 | 9.960921853  | 2.26E-23    | 9.09E-22    |
| ENSG00000103510 | 193.0309768 | 0.087673992  | 0.131904502 | 0.664677785  | 0.506256606 | 0.663809068 |
| ENSG00000103512 | 169.568038  | 0.462487672  | 0.144473459 | 3.201194697  | 0.00136859  | 0.005906171 |
| ENSG00000103522 | 165.1718435 | -0.800051677 | 0.160198822 | -4.994117112 | 5.91E-07    | 5.50E-06    |
| ENSG00000103540 | 348.3937739 | 0.00712185   | 0.104060933 | 0.068439225  | 0.945435998 | 0.969665557 |
| ENSG00000103544 | 371.0010333 | -0.161896299 | 0.100672078 | -1.608154932 | 0.107801251 | 0.222492532 |
| ENSG00000103549 | 634.5245118 | -0.086069875 | 0.085107316 | -1.011309953 | 0.311868104 | 0.483319865 |
| ENSG00000103550 | 703.9805378 | -0.142361841 | 0.083982487 | -1.695137242 | 0.090049389 | 0.19341342  |
| ENSG00000103591 | 231.231836  | -0.548784284 | 0.127957611 | -4.288797534 | 1.80E-05    | 0.00012167  |
| ENSG00000103599 | 24.6468073  | -1.19222593  | 0.372849225 | -3.197608713 | 0.001385722 | 0.005972762 |
| ENSG00000103642 | 61.84084112 | 0.35223729   | 0.229208877 | 1.536752396  | 0.124353955 | 0.248513303 |
| ENSG00000103653 | 460.3217877 | 0.40705454   | 0.096477697 | 4.219156901  | 2.45E-05    | 0.000161641 |
| ENSG00000103657 | 582.5576482 | -0.121306172 | 0.086876285 | -1.396309385 | 0.162621349 | 0.302762371 |
| ENSG00000103671 | 84.68418936 | -0.412874364 | 0.195184711 | -2.115300744 | 0.034404323 | 0.090163718 |
| ENSG00000103707 | 97.91944435 | 0.120085728  | 0.190396995 | 0.630712307  | 0.528228651 | 0.680934946 |
| ENSG00000103723 | 39.37886197 | -1.050616169 | 0.2899937   | -3.622893082 | 0.000291326 | 0.001499989 |
| ENSG00000103740 | 73.58210912 | 0.817357353  | 0.222784879 | 3.6688188    | 0.000243674 | 0.001275292 |
| ENSG00000103742 | 121.0024555 | -0.174396944 | 0.162861904 | -1.070827122 | 0.284247169 | 0.453798699 |
| ENSG00000103769 | 585.4085504 | -0.556823607 | 0.088189374 | -6.313953504 | 2.72E-10    | 4.06E-09    |
| ENSG00000103811 | 59.3474016  | -0.184980895 | 0.238876072 | -0.774380179 | 0.438706001 | 0.604166981 |
| ENSG00000103832 | 9.724385765 | -0.543467654 | 0.556221874 | -0.977069905 | 0.328534546 | 0.500914443 |
| ENSG00000103852 | 213.5541493 | -0.420023258 | 0.132837149 | -3.16194123  | 0.001567212 | 0.006626919 |
| ENSG00000103855 | 934.2294132 | -0.342670451 | 0.073940497 | -4.634408268 | 3.58E-06    | 2.83E-05    |
| ENSG00000103876 | 146.8981839 | -0.027397915 | 0.151602682 | -0.180721834 | 0.85658592  | 0.917807964 |
| ENSG00000103932 | 300.4094782 | 0.255812704  | 0.111457872 | 2.295151513  | 0.021724443 | 0.061761435 |
| ENSG00000103942 | 447.2848749 | 0.054185291  | 0.097812672 | 0.553970046  | 0.579599345 | 0.722800027 |
| ENSG00000103966 | 144.3148049 | -0.080936312 | 0.150924582 | -0.536269913 | 0.591772021 | 0.732260534 |
| ENSG00000103978 | 133.0195606 | 0.012728906  | 0.158973161 | 0.080069531  | 0.936181956 | 0.964894558 |
| ENSG00000103994 | 951.4898104 | -0.213792763 | 0.072796772 | -2.936844011 | 0.003315708 | 0.012584641 |

|                 |             |              |             |              |             |             |
|-----------------|-------------|--------------|-------------|--------------|-------------|-------------|
| ENSG00000103995 | 278.3819303 | -0.412998927 | 0.11442143  | -3.609454325 | 0.000306842 | 0.001570775 |
| ENSG00000104044 | 45.77924584 | 0.41966112   | 0.260721483 | 1.609614654  | 0.107482007 | 0.221998702 |
| ENSG00000104047 | 122.9189094 | -0.132228977 | 0.167331637 | -0.790221024 | 0.4293987   | 0.596200805 |
| ENSG00000104064 | 108.1047805 | 0.198263664  | 0.172673289 | 1.148201116  | 0.250885549 | 0.415196666 |
| ENSG00000104067 | 1635.296014 | 0.017140765  | 0.070497749 | 0.24313918   | 0.80789758  | 0.886465967 |
| ENSG00000104081 | 13.73145308 | -0.907425714 | 0.475078182 | -1.910055542 | 0.056126062 | 0.133537059 |
| ENSG00000104093 | 854.7859638 | 0.053594526  | 0.078211006 | 0.685255548  | 0.493182677 | 0.652452163 |
| ENSG00000104129 | 139.6373991 | 0.501334893  | 0.154226145 | 3.250647903  | 0.001151424 | 0.005082982 |
| ENSG00000104131 | 775.9876506 | 0.058018235  | 0.082092763 | 0.706739942  | 0.479728103 | 0.640321234 |
| ENSG00000104133 | 393.7488986 | -0.130374837 | 0.101449225 | -1.285124035 | 0.198748944 | 0.350564914 |
| ENSG00000104140 | 48.96904543 | 0.286168938  | 0.248365651 | 1.152208194  | 0.249235531 | 0.41339137  |
| ENSG00000104142 | 230.2542231 | 0.410330464  | 0.125479417 | 3.270101766  | 0.001075088 | 0.004792688 |
| ENSG00000104147 | 9.321641574 | -0.06048467  | 0.565263078 | -0.10700269  | 0.914786845 | 0.953830969 |
| ENSG00000104154 | 56.71997182 | -0.299025891 | 0.232712271 | -1.284959701 | 0.198806367 | 0.350564914 |
| ENSG00000104164 | 172.306256  | 0.073338704  | 0.145197932 | 0.50509469   | 0.613492331 | 0.748612122 |
| ENSG00000104177 | 707.444263  | -0.661675417 | 0.08195641  | -8.073504132 | 6.83E-16    | 1.77E-14    |
| ENSG00000104205 | 14.33160084 | 0.598751759  | 0.469818368 | 1.274432417  | 0.20251021  | 0.355138691 |
| ENSG00000104213 | 37.09676917 | -0.789164971 | 0.290529086 | -2.716302805 | 0.006601551 | 0.022634119 |
| ENSG00000104218 | 364.8557573 | -0.15665768  | 0.102315907 | -1.531117533 | 0.125740347 | 0.250570954 |
| ENSG00000104219 | 50.00045796 | -0.15260263  | 0.24913469  | -0.612530633 | 0.540186737 | 0.690194933 |
| ENSG00000104221 | 59.77737085 | 0.419636865  | 0.228618772 | 1.835531095  | 0.066427036 | 0.152631687 |
| ENSG00000104228 | 120.8163534 | -0.059337799 | 0.169096121 | -0.350911652 | 0.72565463  | 0.83027373  |
| ENSG00000104231 | 265.8874352 | -0.000543841 | 0.119218242 | -0.004561723 | 0.996360284 | 0.998279095 |
| ENSG00000104290 | 288.3952684 | -0.079086141 | 0.110430472 | -0.7161623   | 0.473891139 | 0.634943611 |
| ENSG00000104299 | 92.48590275 | -0.275009156 | 0.18757688  | -1.466114354 | 0.142617136 | 0.27469394  |
| ENSG00000104312 | 93.1531736  | 0.448282535  | 0.184727824 | 2.426719082  | 0.015236048 | 0.04612484  |
| ENSG00000104313 | 17.98323518 | -5.017689642 | 0.894922203 | -5.60684451  | 2.06E-08    | 2.42E-07    |
| ENSG00000104320 | 569.6426951 | 0.299203672  | 0.093584214 | 3.197159629  | 0.001387881 | 0.005978401 |
| ENSG00000104324 | 39.63530007 | 0.405720617  | 0.29022887  | 1.397933352  | 0.162133082 | 0.301973403 |
| ENSG00000104325 | 361.8465146 | 0.134788943  | 0.1043833   | 1.291288382  | 0.196603698 | 0.34786398  |
| ENSG00000104331 | 1054.383557 | -0.197071901 | 0.078152154 | -2.521643882 | 0.011680789 | 0.036814012 |
| ENSG00000104332 | 45.00279403 | -8.771805494 | 1.19714712  | -7.327257735 | 2.35E-13    | 4.96E-12    |
| ENSG00000104341 | 881.8546278 | 0.130716718  | 0.096718502 | 1.35151719   | 0.176529817 | 0.321581422 |
| ENSG00000104343 | 97.12095069 | -0.357282403 | 0.181105683 | -1.972784055 | 0.048520171 | 0.119154342 |
| ENSG00000104356 | 314.6588302 | 0.948693894  | 0.116906928 | 8.114950183  | 4.86E-16    | 1.27E-14    |
| ENSG00000104361 | 82.55250998 | -0.258353996 | 0.218189334 | -1.184081692 | 0.236380727 | 0.397609875 |
| ENSG00000104365 | 187.8018526 | 0.202467614  | 0.148582462 | 1.362661584  | 0.17298919  | 0.316650919 |
| ENSG00000104368 | 206.4100456 | 0.78931718   | 0.132254427 | 5.96817208   | 2.40E-09    | 3.19E-08    |
| ENSG00000104369 | 15.60534656 | -3.774731599 | 0.689191872 | -5.477040212 | 4.32E-08    | 4.84E-07    |
| ENSG00000104375 | 238.6020683 | -0.081851689 | 0.119975392 | -0.682237308 | 0.495088908 | 0.654123943 |
| ENSG00000104381 | 43.19332569 | -1.073105862 | 0.290164677 | -3.698264969 | 0.000217078 | 0.001152418 |
| ENSG00000104388 | 483.4705076 | 0.136590123  | 0.094353267 | 1.447645933  | 0.147716098 | 0.281855101 |
| ENSG00000104408 | 3692.067185 | 0.026141381  | 0.054296531 | 0.481455821  | 0.630192572 | 0.760442836 |
| ENSG00000104412 | 268.3712841 | -0.216083107 | 0.117706208 | -1.835783439 | 0.066389692 | 0.15260612  |
| ENSG00000104419 | 43.77809211 | 4.150646686  | 0.592885662 | 7.000754033  | 2.55E-12    | 4.86E-11    |
| ENSG00000104427 | 53.81126715 | -0.272390291 | 0.24507793  | -1.111443576 | 0.266377464 | 0.433229621 |
| ENSG00000104442 | 122.9078118 | -0.014339591 | 0.161141325 | -0.088987667 | 0.929091711 | 0.961351227 |
| ENSG00000104447 | 6740.423195 | 0.781063946  | 0.052339533 | 14.92302102  | 2.33E-50    | 2.47E-48    |
| ENSG00000104450 | 61.6156313  | -0.106663661 | 0.230856786 | -0.4620339   | 0.64405701  | 0.770422279 |
| ENSG00000104472 | 499.0993832 | 0.093740954  | 0.095290947 | 0.983734092  | 0.325246273 | 0.497304277 |

|                 |             |              |             |              |             |             |
|-----------------|-------------|--------------|-------------|--------------|-------------|-------------|
| ENSG00000104490 | 11.12431207 | -1.705864474 | 0.582448763 | -2.928780317 | 0.003402948 | 0.012880953 |
| ENSG00000104497 | 181.4763378 | 0.416464299  | 0.142823093 | 2.915945095  | 0.003546129 | 0.013358132 |
| ENSG00000104517 | 2853.069268 | 0.352825966  | 0.062149653 | 5.677038351  | 1.37E-08    | 1.65E-07    |
| ENSG00000104522 | 374.3570147 | 0.80848215   | 0.107561783 | 7.516444268  | 5.63E-14    | 1.26E-12    |
| ENSG00000104524 | 128.5116039 | 0.190650568  | 0.165599602 | 1.151274314  | 0.249619401 | 0.413789489 |
| ENSG00000104529 | 1548.865471 | 0.196773781  | 0.064164674 | 3.066699629  | 0.002164362 | 0.008726406 |
| ENSG00000104549 | 1082.860953 | 0.178213918  | 0.082252827 | 2.16666008   | 0.030260783 | 0.081074426 |
| ENSG00000104611 | 178.2487372 | -0.355092746 | 0.137443412 | -2.583555955 | 0.00977876  | 0.031645629 |
| ENSG00000104613 | 479.8887698 | 0.313843666  | 0.092227038 | 3.40294638   | 0.000666634 | 0.003128701 |
| ENSG00000104626 | 151.0854393 | -0.01765892  | 0.171197578 | -0.103149354 | 0.917844435 | 0.955355281 |
| ENSG00000104635 | 552.1990914 | -0.147648154 | 0.090225478 | -1.636435272 | 0.101748522 | 0.212572927 |
| ENSG00000104643 | 201.7639292 | -0.317790529 | 0.137453835 | -2.311980089 | 0.020778781 | 0.059603743 |
| ENSG00000104660 | 164.849017  | 0.016112561  | 0.141950483 | 0.11350832   | 0.909627567 | 0.951381168 |
| ENSG00000104671 | 97.99549234 | -0.121858196 | 0.178985063 | -0.680828859 | 0.495979787 | 0.654672813 |
| ENSG00000104679 | 77.09489047 | 0.293799141  | 0.211245484 | 1.390794897  | 0.164287631 | 0.305257719 |
| ENSG00000104687 | 872.6296348 | 0.220172762  | 0.078453297 | 2.80641822   | 0.005009563 | 0.017937846 |
| ENSG00000104691 | 44.22126965 | 0.28805067   | 0.263750297 | 1.092134015  | 0.2747742   | 0.443140435 |
| ENSG00000104695 | 151.5111819 | 0.175714489  | 0.153884709 | 1.141858017  | 0.253513042 | 0.418411197 |
| ENSG00000104714 | 320.7217983 | -0.212294789 | 0.116106294 | -1.828452024 | 0.06748174  | 0.154686031 |
| ENSG00000104722 | 97.15576228 | -1.372738431 | 0.193781946 | -7.083933571 | 1.40E-12    | 2.76E-11    |
| ENSG00000104723 | 361.2311731 | 0.261070132  | 0.101189625 | 2.580008877  | 0.009879778 | 0.031940445 |
| ENSG00000104728 | 25.7127954  | -0.188394668 | 0.341158746 | -0.552219955 | 0.580797664 | 0.723524724 |
| ENSG00000104731 | 192.4196348 | -0.895517547 | 0.137846269 | -6.496494633 | 8.22E-11    | 1.32E-09    |
| ENSG00000104738 | 1738.285167 | 0.008049415  | 0.062413318 | 0.128969504  | 0.897381779 | 0.944375326 |
| ENSG00000104756 | 214.2991606 | 0.062405173  | 0.131494675 | 0.474583273  | 0.635084031 | 0.764244443 |
| ENSG00000104760 | 6.365924096 | -3.48701152  | 1.015854768 | -3.432588623 | 0.000597848 | 0.002842917 |
| ENSG00000104763 | 337.9410169 | 0.244196665  | 0.109930013 | 2.221383038  | 0.026325029 | 0.072408005 |
| ENSG00000104765 | 448.3452404 | 0.809567103  | 0.101762848 | 7.955428926  | 1.79E-15    | 4.45E-14    |
| ENSG00000104774 | 149.083839  | -0.120511811 | 0.149396744 | -0.806656208 | 0.419864581 | 0.587668171 |
| ENSG00000104804 | 16.73194926 | 3.502444285  | 0.604348424 | 5.795405675  | 6.82E-09    | 8.59E-08    |
| ENSG00000104805 | 870.9785633 | 0.348505292  | 0.087617399 | 3.977580911  | 6.96E-05    | 0.000415796 |
| ENSG00000104812 | 732.8282676 | 0.378285282  | 0.08200446  | 4.612984244  | 3.97E-06    | 3.10E-05    |
| ENSG00000104823 | 1289.607481 | 0.40023951   | 0.082614003 | 4.844693308  | 1.27E-06    | 1.10E-05    |
| ENSG00000104824 | 1509.691207 | 0.310720237  | 0.063401627 | 4.900824338  | 9.54E-07    | 8.49E-06    |
| ENSG00000104825 | 134.4290993 | 0.238851748  | 0.16199147  | 1.474471146  | 0.140354781 | 0.271453065 |
| ENSG00000104833 | 158.3049477 | -0.364903091 | 0.158631944 | -2.300312802 | 0.021430505 | 0.061123716 |
| ENSG00000104835 | 68.27110392 | 0.182383924  | 0.244905072 | 0.744712728  | 0.456445403 | 0.620145911 |
| ENSG00000104852 | 1799.883622 | 0.268925292  | 0.081909801 | 3.28318821   | 0.001026401 | 0.004601933 |
| ENSG00000104853 | 838.375381  | 0.202074934  | 0.079666735 | 2.536503267  | 0.01119657  | 0.035486962 |
| ENSG00000104856 | 105.6624173 | 0.428136188  | 0.184041067 | 2.326307902  | 0.020002131 | 0.057753326 |
| ENSG00000104859 | 263.1430283 | 0.362222505  | 0.117568912 | 3.0809378    | 0.002063497 | 0.008379864 |
| ENSG00000104863 | 54.343386   | 0.176556436  | 0.252486875 | 0.699269757  | 0.484383463 | 0.644880533 |
| ENSG00000104866 | 130.6166695 | -0.083008218 | 0.164764339 | -0.503799661 | 0.614402166 | 0.749042347 |
| ENSG00000104870 | 163.8126968 | -0.831866216 | 0.146012948 | -5.697208544 | 1.22E-08    | 1.48E-07    |
| ENSG00000104872 | 183.7765658 | -0.733831846 | 0.141318942 | -5.192735222 | 2.07E-07    | 2.08E-06    |
| ENSG00000104880 | 150.4645806 | -0.272167047 | 0.153286573 | -1.775543952 | 0.075808115 | 0.168893988 |
| ENSG00000104881 | 199.8409365 | -0.100380316 | 0.138849786 | -0.722941811 | 0.469715634 | 0.631654585 |
| ENSG00000104884 | 408.1423833 | -0.08829845  | 0.097242107 | -0.908026912 | 0.363864003 | 0.534850783 |
| ENSG00000104885 | 1164.690975 | -0.288966966 | 0.069956485 | -4.130667299 | 3.62E-05    | 0.000229804 |
| ENSG00000104886 | 356.2113293 | 0.370657788  | 0.101998954 | 3.633937153  | 0.000279129 | 0.001444171 |

|                 |             |              |             |              |             |             |
|-----------------|-------------|--------------|-------------|--------------|-------------|-------------|
| ENSG00000104888 | 223.3767071 | -0.281917107 | 0.129192295 | -2.18215108  | 0.029098384 | 0.078574588 |
| ENSG00000104897 | 607.9590927 | 0.369989526  | 0.092457957 | 4.001705606  | 6.29E-05    | 0.000378808 |
| ENSG00000104899 | 19.14608431 | -0.983461505 | 0.440036793 | -2.234952897 | 0.025420441 | 0.070305363 |
| ENSG00000104901 | 17.18985355 | 0.047318837  | 0.447071533 | 0.105841757  | 0.915707905 | 0.954435272 |
| ENSG00000104904 | 2371.68875  | 0.28434712   | 0.068147127 | 4.172547459  | 3.01E-05    | 0.000194535 |
| ENSG00000104907 | 311.1944227 | 0.117056709  | 0.106916295 | 1.094844414  | 0.273584805 | 0.441780176 |
| ENSG00000104915 | 239.9420951 | 0.29065539   | 0.123578683 | 2.35198647   | 0.018673454 | 0.054578862 |
| ENSG00000104936 | 258.5574404 | -0.216625003 | 0.123693444 | -1.751305455 | 0.079893309 | 0.176331292 |
| ENSG00000104946 | 348.6943628 | 0.543500458  | 0.105326296 | 5.160159236  | 2.47E-07    | 2.45E-06    |
| ENSG00000104953 | 42.39833049 | -2.325406283 | 0.323304466 | -7.192620362 | 6.36E-13    | 1.29E-11    |
| ENSG00000104957 | 86.96145785 | 0.044583351  | 0.209376365 | 0.212934017  | 0.831378429 | 0.901477895 |
| ENSG00000104960 | 620.8568902 | 0.250007888  | 0.082952505 | 3.013867846  | 0.002579401 | 0.010160642 |
| ENSG00000104964 | 838.3518925 | -0.286768342 | 0.078513411 | -3.652475894 | 0.000259724 | 0.001351488 |
| ENSG00000104967 | 11.78129869 | -2.111700987 | 0.588983803 | -3.585329474 | 0.000336653 | 0.001701678 |
| ENSG00000104969 | 727.1764407 | 0.124306467  | 0.086923015 | 1.430075419  | 0.152695374 | 0.289017785 |
| ENSG00000104973 | 573.420799  | 0.259962663  | 0.085488163 | 3.04091997   | 0.002358565 | 0.009393469 |
| ENSG00000104976 | 169.298805  | 0.186493995  | 0.149066208 | 1.251081633  | 0.210904696 | 0.366157244 |
| ENSG00000104979 | 652.6286194 | 0.458932503  | 0.085118224 | 5.391706776  | 6.98E-08    | 7.51E-07    |
| ENSG00000104980 | 409.6099425 | 0.008340814  | 0.107728658 | 0.077424281  | 0.938286025 | 0.966102042 |
| ENSG00000104983 | 18.53095104 | -0.201374098 | 0.442612811 | -0.454966719 | 0.649133183 | 0.774121217 |
| ENSG00000104998 | 356.6986913 | 0.525096024  | 0.105939909 | 4.956545924  | 7.18E-07    | 6.55E-06    |
| ENSG00000105011 | 142.1335086 | -0.919682143 | 0.154756102 | -5.942784356 | 2.80E-09    | 3.68E-08    |
| ENSG00000105048 | 803.6321027 | -0.758783498 | 0.080059453 | -9.477750221 | 2.60E-21    | 9.48E-20    |
| ENSG00000105053 | 92.28035732 | 0.202689133  | 0.19232999  | 1.053861297  | 0.291946425 | 0.462535239 |
| ENSG00000105058 | 409.3856078 | -0.019855837 | 0.107134088 | -0.185336314 | 0.852965257 | 0.915744647 |
| ENSG00000105063 | 1055.423619 | 0.474798398  | 0.079220445 | 5.993382153  | 2.06E-09    | 2.76E-08    |
| ENSG00000105072 | 73.02675885 | 0.455574867  | 0.20787287  | 2.191603298  | 0.028408164 | 0.077051453 |
| ENSG00000105085 | 160.2814035 | 0.148186898  | 0.151747738 | 0.976534481  | 0.328799669 | 0.501209871 |
| ENSG00000105088 | 195.7734614 | 0.427500657  | 0.134768568 | 3.172109504  | 0.001513359 | 0.006436015 |
| ENSG00000105127 | 523.7606464 | 0.137613493  | 0.093655665 | 1.469355789  | 0.141736312 | 0.273334703 |
| ENSG00000105131 | 7.524775332 | -0.044061246 | 0.622213476 | -0.070813713 | 0.943546018 | 0.968637121 |
| ENSG00000105135 | 231.3669397 | 0.051714788  | 0.13374853  | 0.386656868  | 0.699010252 | 0.8110439   |
| ENSG00000105136 | 38.88624508 | 0.030466838  | 0.282048322 | 0.108019922  | 0.913979889 | 0.953626644 |
| ENSG00000105137 | 335.8698667 | 0.199864966  | 0.104954189 | 1.9043067    | 0.056870252 | 0.134850849 |
| ENSG00000105171 | 117.6099928 | -0.073855732 | 0.173528071 | -0.425612593 | 0.670390163 | 0.789616855 |
| ENSG00000105173 | 162.3937363 | -0.160524839 | 0.147765138 | -1.086351225 | 0.277323632 | 0.445920908 |
| ENSG00000105176 | 469.7235277 | -5.05E-05    | 0.095117125 | -0.000530834 | 0.999576456 | 0.999854605 |
| ENSG00000105185 | 476.2322759 | 0.410891512  | 0.094889256 | 4.330221687  | 1.49E-05    | 0.000102772 |
| ENSG00000105186 | 327.8918848 | 0.093525503  | 0.108975565 | 0.858224524  | 0.390768497 | 0.559133568 |
| ENSG00000105193 | 3529.945599 | 0.155925819  | 0.065702135 | 2.373223017  | 0.017633613 | 0.052136259 |
| ENSG00000105197 | 530.2529301 | 0.213376053  | 0.090682542 | 2.35300034   | 0.018622617 | 0.054452935 |
| ENSG00000105202 | 1304.451833 | 0.492511378  | 0.072073853 | 6.833426562  | 8.29E-12    | 1.47E-10    |
| ENSG00000105204 | 102.5380878 | -0.005071432 | 0.187537333 | -0.027042252 | 0.978426034 | 0.988843871 |
| ENSG00000105220 | 2369.774084 | 0.217266052  | 0.062682035 | 3.466161458  | 0.000527946 | 0.00254323  |
| ENSG00000105221 | 749.4127867 | 0.023077464  | 0.093870148 | 0.245844547  | 0.805802571 | 0.885189466 |
| ENSG00000105223 | 1758.437765 | 0.340044021  | 0.077537497 | 4.385542935  | 1.16E-05    | 8.18E-05    |
| ENSG00000105227 | 46.03835844 | 0.205139669  | 0.273312205 | 0.750569005  | 0.452912081 | 0.617396281 |
| ENSG00000105229 | 268.2437894 | -0.112327343 | 0.124825008 | -0.899878517 | 0.368184904 | 0.539469422 |
| ENSG00000105245 | 348.6190604 | 0.267356536  | 0.106993304 | 2.498815578  | 0.012460914 | 0.038897435 |
| ENSG00000105246 | 9.135116325 | -2.161965616 | 0.665998072 | -3.246204015 | 0.00116955  | 0.005143603 |

|                 |             |              |             |              |             |             |
|-----------------|-------------|--------------|-------------|--------------|-------------|-------------|
| ENSG00000105248 | 224.9771373 | 0.142964093  | 0.123388835 | 1.158646918  | 0.246600136 | 0.410522886 |
| ENSG00000105254 | 754.5982812 | 0.252873635  | 0.092035024 | 2.747580467  | 0.006003678 | 0.020848865 |
| ENSG00000105255 | 63.83583322 | 0.150019368  | 0.222987958 | 0.672768923  | 0.501094311 | 0.659379091 |
| ENSG00000105258 | 337.5192116 | 0.523955262  | 0.106534504 | 4.918174314  | 8.74E-07    | 7.83E-06    |
| ENSG00000105270 | 82.61935381 | 0.141306554  | 0.196774023 | 0.718115896  | 0.47268583  | 0.633981332 |
| ENSG00000105281 | 586.6064457 | -0.1465447   | 0.099842958 | -1.467751995 | 0.142171602 | 0.274023667 |
| ENSG00000105287 | 247.1524092 | -0.07414897  | 0.126864981 | -0.58447153  | 0.558903115 | 0.705699959 |
| ENSG00000105289 | 20.16227563 | -1.638977095 | 0.423432615 | -3.870691665 | 0.000108527 | 0.000620211 |
| ENSG00000105290 | 1396.804888 | 0.273214601  | 0.06731631  | 4.058668715  | 4.94E-05    | 0.000304331 |
| ENSG00000105298 | 244.9539136 | 0.000690094  | 0.124542198 | 0.005541047  | 0.995578907 | 0.997940364 |
| ENSG00000105321 | 217.1119551 | 0.079288472  | 0.126163136 | 0.628459904  | 0.529702705 | 0.682186526 |
| ENSG00000105323 | 3739.682811 | 0.124671736  | 0.063725898 | 1.956374721  | 0.050421028 | 0.122682436 |
| ENSG00000105325 | 212.0760379 | 0.18762681   | 0.139060655 | 1.349244401  | 0.177258478 | 0.322541668 |
| ENSG00000105327 | 56.09915435 | -0.100328189 | 0.241071311 | -0.416176394 | 0.677280932 | 0.795199369 |
| ENSG00000105329 | 1474.27798  | 0.61810274   | 0.08553007  | 7.226730165  | 4.95E-13    | 1.01E-11    |
| ENSG00000105339 | 47.05159539 | -0.356056866 | 0.284692117 | -1.250673428 | 0.211053649 | 0.366274791 |
| ENSG00000105341 | 374.6322502 | -0.066529212 | 0.100994225 | -0.658742741 | 0.510060982 | 0.666495499 |
| ENSG00000105355 | 410.2087918 | 0.177575378  | 0.098847484 | 1.796458247  | 0.072421667 | 0.163146311 |
| ENSG00000105357 | 457.5518513 | 0.124046957  | 0.095224759 | 1.302675473  | 0.192685579 | 0.343266243 |
| ENSG00000105364 | 622.0364948 | 0.37400889   | 0.093155881 | 4.014871466  | 5.95E-05    | 0.000359042 |
| ENSG00000105372 | 5386.553815 | 0.121314858  | 0.057879946 | 2.095973916  | 0.036084505 | 0.093762309 |
| ENSG00000105373 | 1343.92752  | 0.046753476  | 0.075371912 | 0.620303705  | 0.535057856 | 0.685971818 |
| ENSG00000105376 | 163.9695322 | 0.728626207  | 0.150630035 | 4.83719073   | 1.32E-06    | 1.14E-05    |
| ENSG00000105379 | 130.9954036 | 0.168138508  | 0.161608452 | 1.040406647  | 0.298151015 | 0.468750272 |
| ENSG00000105393 | 109.8190819 | 0.288053475  | 0.17351901  | 1.660068685  | 0.096900636 | 0.204501687 |
| ENSG00000105397 | 569.0846576 | 0.019054216  | 0.098034005 | 0.194363334  | 0.845891398 | 0.910865194 |
| ENSG00000105401 | 731.8318728 | 0.161958954  | 0.080650414 | 2.008160229  | 0.044626268 | 0.111522004 |
| ENSG00000105402 | 195.9803363 | 0.518620011  | 0.137628187 | 3.768268875  | 0.000164384 | 0.000897782 |
| ENSG00000105404 | 75.55744382 | -0.032766231 | 0.216071804 | -0.151645102 | 0.879466858 | 0.933918276 |
| ENSG00000105409 | 7.655561235 | -1.775200699 | 0.707063496 | -2.510666594 | 0.012050345 | 0.037809067 |
| ENSG00000105419 | 111.9047023 | -0.968980415 | 0.181114404 | -5.350101323 | 8.79E-08    | 9.33E-07    |
| ENSG00000105426 | 2112.580437 | -0.913316127 | 0.07012495  | -13.02412515 | 8.92E-39    | 6.67E-37    |
| ENSG00000105427 | 72.54249969 | -2.860221684 | 0.278482199 | -10.27075228 | 9.55E-25    | 4.19E-23    |
| ENSG00000105429 | 382.2227011 | -1.122105617 | 0.114144401 | -9.830579547 | 8.31E-23    | 3.24E-21    |
| ENSG00000105438 | 1891.213083 | 0.19772105   | 0.0676401   | 2.923133617  | 0.003465278 | 0.01308515  |
| ENSG00000105443 | 313.7693586 | -0.179920043 | 0.113561529 | -1.584339743 | 0.113116426 | 0.230985091 |
| ENSG00000105447 | 438.4423361 | 0.091903045  | 0.099566924 | 0.923027869  | 0.355992682 | 0.527308874 |
| ENSG00000105464 | 447.4461437 | 0.706109038  | 0.101017108 | 6.989994602  | 2.75E-12    | 5.20E-11    |
| ENSG00000105472 | 1209.014151 | 0.343996299  | 0.097224165 | 3.538176959  | 0.0004029   | 0.001996309 |
| ENSG00000105479 | 26.13753811 | -0.042601508 | 0.339693773 | -0.125411506 | 0.90019778  | 0.946063011 |
| ENSG00000105483 | 182.8212185 | 0.022398468  | 0.137432743 | 0.162977666  | 0.87053602  | 0.927945136 |
| ENSG00000105486 | 764.4263042 | -0.550502661 | 0.081114109 | -6.786768281 | 1.15E-11    | 2.01E-10    |
| ENSG00000105497 | 53.9575994  | -0.174452718 | 0.242693664 | -0.718818595 | 0.472252699 | 0.633897148 |
| ENSG00000105499 | 124.4929834 | 0.350998841  | 0.172232692 | 2.037933891  | 0.041556545 | 0.105369095 |
| ENSG00000105514 | 172.0136009 | -0.105473339 | 0.138239144 | -0.762977374 | 0.44547689  | 0.610498914 |
| ENSG00000105516 | 245.9672277 | 0.218799373  | 0.132126889 | 1.655979142  | 0.097726043 | 0.20596515  |
| ENSG00000105518 | 315.4632809 | -0.218726236 | 0.107647519 | -2.031874389 | 0.042166374 | 0.106799685 |
| ENSG00000105520 | 175.1711375 | 0.373215146  | 0.143593257 | 2.599113311  | 0.009346492 | 0.030513582 |
| ENSG00000105538 | 31.54697741 | -1.866987353 | 0.350146069 | -5.332024312 | 9.71E-08    | 1.02E-06    |
| ENSG00000105552 | 232.2688432 | 0.247524475  | 0.129898819 | 1.905517508  | 0.056712834 | 0.13463667  |

|                 |             |              |             |              |             |             |
|-----------------|-------------|--------------|-------------|--------------|-------------|-------------|
| ENSG00000105556 | 347.6281493 | 0.462323348  | 0.105310305 | 4.390105495  | 1.13E-05    | 8.04E-05    |
| ENSG00000105559 | 634.0838926 | 0.397040881  | 0.086238315 | 4.603996258  | 4.14E-06    | 3.22E-05    |
| ENSG00000105568 | 872.1054756 | -0.077214291 | 0.081383396 | -0.948772047 | 0.342736562 | 0.514590639 |
| ENSG00000105576 | 920.9774907 | 0.01651285   | 0.073063612 | 0.226006476  | 0.821196383 | 0.895180952 |
| ENSG00000105605 | 409.4759094 | -0.341078107 | 0.105232753 | -3.241178231 | 0.001190367 | 0.005220446 |
| ENSG00000105607 | 111.0175748 | 0.012239501  | 0.172161764 | 0.071093026  | 0.943323719 | 0.968637121 |
| ENSG00000105612 | 406.8494329 | 0.208087627  | 0.103981581 | 2.001196987  | 0.045371166 | 0.112981521 |
| ENSG00000105613 | 187.4929934 | 0.168249453  | 0.14167919  | 1.18753822   | 0.23501539  | 0.396024614 |
| ENSG00000105617 | 121.1980415 | 0.382354745  | 0.162399317 | 2.354411051  | 0.018552083 | 0.05430734  |
| ENSG00000105618 | 435.3911949 | 0.285787872  | 0.0956992   | 2.986314121  | 0.002823624 | 0.010962811 |
| ENSG00000105619 | 135.6173957 | 0.051240469  | 0.154911401 | 0.330772743  | 0.740816151 | 0.841588716 |
| ENSG00000105639 | 124.5787054 | -0.498065623 | 0.169509839 | -2.938269685 | 0.003300498 | 0.012537072 |
| ENSG00000105640 | 815.2225607 | 0.224303731  | 0.083539203 | 2.685011627  | 0.007252728 | 0.02459659  |
| ENSG00000105641 | 29.76054243 | -4.116412895 | 0.547699702 | -7.515820945 | 5.66E-14    | 1.26E-12    |
| ENSG00000105642 | 29.50449356 | -1.05135242  | 0.339027577 | -3.101082303 | 0.001928147 | 0.007931092 |
| ENSG00000105643 | 115.3650001 | 0.149701619  | 0.172005025 | 0.870332827  | 0.384118544 | 0.553241226 |
| ENSG00000105649 | 248.6993574 | 0.173523209  | 0.141002026 | 1.230643373  | 0.218456276 | 0.375499801 |
| ENSG00000105650 | 11.33206517 | -2.274169968 | 0.609063214 | -3.733881665 | 0.000188551 | 0.001016338 |
| ENSG00000105655 | 1455.653218 | -0.35272453  | 0.083144232 | -4.242321094 | 2.21E-05    | 0.000147344 |
| ENSG00000105656 | 108.4500864 | -0.011765801 | 0.175974316 | -0.066860899 | 0.946692441 | 0.970529027 |
| ENSG00000105662 | 333.295081  | -0.011708311 | 0.106830556 | -0.109597023 | 0.912728972 | 0.953043412 |
| ENSG00000105668 | 9.446225045 | 0.56740809   | 0.558172113 | 1.016546827  | 0.30936906  | 0.480613492 |
| ENSG00000105669 | 798.8735725 | 0.231256645  | 0.101953186 | 2.268263056  | 0.023313178 | 0.065404477 |
| ENSG00000105671 | 263.49712   | 0.347865977  | 0.117008429 | 2.972999286  | 0.002949051 | 0.011371212 |
| ENSG00000105676 | 184.2010987 | 0.383503954  | 0.137545229 | 2.788202531  | 0.00530014  | 0.018791283 |
| ENSG00000105677 | 254.9549664 | 0.958174159  | 0.127019287 | 7.543532826  | 4.57E-14    | 1.04E-12    |
| ENSG00000105698 | 557.5019279 | 0.466755229  | 0.099938707 | 4.670414948  | 3.01E-06    | 2.41E-05    |
| ENSG00000105699 | 296.1101263 | -1.518875197 | 0.124215155 | -12.22777685 | 2.21E-34    | 1.40E-32    |
| ENSG00000105700 | 715.6674116 | 0.11054086   | 0.081514413 | 1.356089758  | 0.175070611 | 0.319564395 |
| ENSG00000105701 | 1376.074605 | 0.24824659   | 0.091696758 | 2.707255922  | 0.006784194 | 0.023164212 |
| ENSG00000105705 | 226.6329329 | -0.075964771 | 0.125875912 | -0.603489338 | 0.546183206 | 0.694729455 |
| ENSG00000105708 | 42.85732558 | 0.314060344  | 0.271211427 | 1.157990825  | 0.246867781 | 0.410919743 |
| ENSG00000105711 | 28.35091995 | -0.555426874 | 0.336287839 | -1.651641268 | 0.098607702 | 0.207449811 |
| ENSG00000105722 | 458.9876906 | 0.109537156  | 0.112272946 | 0.97563269   | 0.329246519 | 0.501782125 |
| ENSG00000105723 | 453.4351702 | 0.250424773  | 0.102070012 | 2.453460794  | 0.014148896 | 0.043272272 |
| ENSG00000105726 | 830.6801517 | 0.461904173  | 0.076318482 | 6.05232389   | 1.43E-09    | 1.95E-08    |
| ENSG00000105732 | 265.127139  | 0.098350226  | 0.123140223 | 0.798684815  | 0.424473194 | 0.591642683 |
| ENSG00000105737 | 10.17681812 | 0.760469795  | 0.543412085 | 1.399434822  | 0.161682631 | 0.301334207 |
| ENSG00000105738 | 487.6439973 | -0.196411084 | 0.090491177 | -2.170499817 | 0.029969002 | 0.08040131  |
| ENSG00000105755 | 90.67689827 | -0.173927461 | 0.190915731 | -0.911016917 | 0.36228646  | 0.533106842 |
| ENSG00000105767 | 41.33699435 | 0.293047933  | 0.290566805 | 1.008538923  | 0.313195812 | 0.484308847 |
| ENSG00000105771 | 249.4221385 | 0.060004523  | 0.121671243 | 0.49316931   | 0.621892961 | 0.754771939 |
| ENSG00000105778 | 442.8895344 | 0.002454507  | 0.100825686 | 0.024344064  | 0.980578166 | 0.990159622 |
| ENSG00000105793 | 107.6051067 | 0.094669105  | 0.173647536 | 0.545179663  | 0.585629958 | 0.727480015 |
| ENSG00000105819 | 622.5197844 | 0.364831019  | 0.092413652 | 3.947804363  | 7.89E-05    | 0.000464725 |
| ENSG00000105821 | 822.7833576 | 1.0276988    | 0.078164218 | 13.14794456  | 1.75E-39    | 1.33E-37    |
| ENSG00000105829 | 31.55940993 | 0.427441835  | 0.312536157 | 1.367655632  | 0.171419894 | 0.314504514 |
| ENSG00000105835 | 556.0822398 | 0.732848367  | 0.09209594  | 7.957444912  | 1.76E-15    | 4.41E-14    |
| ENSG00000105849 | 99.25122682 | 0.404385599  | 0.182884422 | 2.211153882  | 0.027025183 | 0.074029396 |
| ENSG00000105854 | 417.4699495 | 0.535963456  | 0.098095333 | 5.46369983   | 4.66E-08    | 5.19E-07    |



|                 |             |              |             |              |             |             |
|-----------------|-------------|--------------|-------------|--------------|-------------|-------------|
| ENSG00000105856 | 188.1179459 | 0.1428923    | 0.137479742 | 1.039369862  | 0.298632755 | 0.469182736 |
| ENSG00000105865 | 15.49605228 | 0.301502407  | 0.435917274 | 0.691650514  | 0.489156831 | 0.648959766 |
| ENSG00000105866 | 119.6567858 | -0.132648045 | 0.168047583 | -0.789348127 | 0.429908565 | 0.59673178  |
| ENSG00000105875 | 110.7019064 | 0.705814203  | 0.170607092 | 4.137074217  | 3.52E-05    | 0.000223888 |
| ENSG00000105879 | 433.1408575 | 0.484899632  | 0.096881834 | 5.00506249   | 5.58E-07    | 5.23E-06    |
| ENSG00000105887 | 712.1644698 | 0.552245928  | 0.08447141  | 6.537666719  | 6.25E-11    | 1.02E-09    |
| ENSG00000105926 | 286.9010548 | 0.288203878  | 0.112584111 | 2.559898318  | 0.010470279 | 0.033517779 |
| ENSG00000105928 | 186.452948  | -0.106827452 | 0.144645083 | -0.738548797 | 0.460181026 | 0.62341237  |
| ENSG00000105939 | 1123.248254 | 0.400031077  | 0.070261591 | 5.693453194  | 1.24E-08    | 1.51E-07    |
| ENSG00000105948 | 48.8757091  | 0.674559982  | 0.26121837  | 2.582360432  | 0.009812704 | 0.031738213 |
| ENSG00000105953 | 685.6472844 | -0.552091824 | 0.087089104 | -6.3393903   | 2.31E-10    | 3.48E-09    |
| ENSG00000105967 | 22.43206079 | -4.619360021 | 0.717830862 | -6.435164979 | 1.23E-10    | 1.93E-09    |
| ENSG00000105968 | 467.4813006 | -0.207812028 | 0.093304012 | -2.227257141 | 0.025930093 | 0.071531818 |
| ENSG00000105974 | 8.683549523 | -6.399131177 | 1.269697058 | -5.039888165 | 4.66E-07    | 4.41E-06    |
| ENSG00000105983 | 637.7084533 | 0.483570872  | 0.084021491 | 5.755323643  | 8.65E-09    | 1.07E-07    |
| ENSG00000105993 | 371.0455454 | 0.750692954  | 0.10631111  | 7.061284157  | 1.65E-12    | 3.22E-11    |
| ENSG00000106009 | 297.3205653 | 0.013238279  | 0.118949166 | 0.111293583  | 0.911383544 | 0.952474119 |
| ENSG00000106012 | 458.1246692 | 0.045373337  | 0.094833228 | 0.478453998  | 0.632327109 | 0.761995244 |
| ENSG00000106025 | 128.7594252 | -3.115587985 | 0.21305244  | -14.62357333 | 1.99E-48    | 2.05E-46    |
| ENSG00000106028 | 1162.07654  | 0.870923044  | 0.070531455 | 12.34800904  | 4.99E-35    | 3.25E-33    |
| ENSG00000106031 | 902.4765508 | -2.282623594 | 0.095980675 | -23.78211638 | 5.11E-125   | 1.84E-122   |
| ENSG00000106034 | 740.8985714 | -3.793235616 | 0.113946136 | -33.2897258  | 5.44E-243   | 5.09E-240   |
| ENSG00000106038 | 65.8726786  | -7.511445662 | 1.010867844 | -7.430690078 | 1.08E-13    | 2.36E-12    |
| ENSG00000106049 | 495.2543024 | -0.723538656 | 0.094652772 | -7.644135967 | 2.10E-14    | 4.87E-13    |
| ENSG00000106052 | 821.6042917 | -1.14799087  | 0.078947684 | -14.54115949 | 6.65E-48    | 6.62E-46    |
| ENSG00000106070 | 64.40921421 | -3.334051593 | 0.316477009 | -10.53489354 | 5.97E-26    | 2.80E-24    |
| ENSG00000106077 | 178.4019843 | -0.007959306 | 0.136895807 | -0.058141343 | 0.953636043 | 0.974659888 |
| ENSG00000106080 | 263.0030396 | 0.364022344  | 0.119602189 | 3.043609372  | 0.002337585 | 0.009331074 |
| ENSG00000106086 | 211.8783787 | -0.078483797 | 0.126180169 | -0.621997877 | 0.533943264 | 0.685234734 |
| ENSG00000106089 | 20.23397666 | 0.362255825  | 0.388470375 | 0.932518536  | 0.351068612 | 0.522671567 |
| ENSG00000106100 | 70.60216194 | 0.194306972  | 0.218563556 | 0.889018166  | 0.373993317 | 0.544085443 |
| ENSG00000106105 | 1539.800768 | -0.219533611 | 0.0713324   | -3.07761426  | 0.002086648 | 0.008461648 |
| ENSG00000106125 | 23.92782261 | 0.052191172  | 0.368250255 | 0.141727456  | 0.887295287 | 0.93824263  |
| ENSG00000106144 | 511.4343816 | 0.78745693   | 0.100969091 | 7.798989963  | 6.24E-15    | 1.49E-13    |
| ENSG00000106153 | 1616.014366 | 0.25214938   | 0.15716893  | 1.604320782  | 0.108643362 | 0.223737474 |
| ENSG00000106211 | 2206.636676 | 1.885490929  | 0.075303704 | 25.03848856  | 2.33E-138   | 1.06E-135   |
| ENSG00000106244 | 1011.333868 | 0.334722296  | 0.078224102 | 4.279017442  | 1.88E-05    | 0.000126652 |
| ENSG00000106245 | 512.4692095 | -0.123349515 | 0.089908112 | -1.371950899 | 0.170078724 | 0.313030658 |
| ENSG00000106246 | 122.8479299 | 0.012232193  | 0.164438095 | 0.074387828  | 0.940701794 | 0.967262249 |
| ENSG00000106261 | 930.92386   | -0.003710477 | 0.074026732 | -0.050123475 | 0.960023993 | 0.978814678 |
| ENSG00000106263 | 2294.906892 | 0.398150823  | 0.060694088 | 6.55996056   | 5.38E-11    | 8.86E-10    |
| ENSG00000106266 | 275.3800908 | 0.3932215    | 0.115192823 | 3.413593732  | 0.000641121 | 0.00301905  |
| ENSG00000106268 | 201.2242515 | -0.003525021 | 0.134107072 | -0.026285122 | 0.979029921 | 0.989312517 |
| ENSG00000106290 | 587.7393891 | -0.105881468 | 0.087184498 | -1.214452915 | 0.224574819 | 0.382778461 |
| ENSG00000106299 | 762.2783031 | 0.776707233  | 0.080832745 | 9.608819158  | 7.34E-22    | 2.74E-20    |
| ENSG00000106305 | 161.4043846 | 0.257453037  | 0.156257375 | 1.64762167   | 0.099430331 | 0.208805181 |
| ENSG00000106327 | 249.6005251 | 0.763117821  | 0.119692644 | 6.375645119  | 1.82E-10    | 2.78E-09    |
| ENSG00000106330 | 46.9651392  | -0.076312753 | 0.261926408 | -0.291351886 | 0.770782208 | 0.862998381 |
| ENSG00000106333 | 1563.79412  | 0.004843145  | 0.072970031 | 0.066371703  | 0.947081898 | 0.970644931 |
| ENSG00000106344 | 1162.595125 | 0.66897149   | 0.069789518 | 9.585558205  | 9.20E-22    | 3.42E-20    |

|                 |             |              |             |              |             |             |
|-----------------|-------------|--------------|-------------|--------------|-------------|-------------|
| ENSG00000106346 | 404.5133644 | 0.155988872  | 0.100467071 | 1.552636813  | 0.120509926 | 0.2426502   |
| ENSG00000106348 | 964.1941735 | 1.136822921  | 0.075378352 | 15.08155705  | 2.14E-51    | 2.41E-49    |
| ENSG00000106351 | 62.97008357 | -0.941334031 | 0.234075792 | -4.021492453 | 5.78E-05    | 0.000350149 |
| ENSG00000106355 | 146.4130107 | -0.031758037 | 0.149158822 | -0.212914239 | 0.831393856 | 0.901477895 |
| ENSG00000106366 | 62.8436046  | -0.463063407 | 0.22146284  | -2.090930497 | 0.036534295 | 0.094755768 |
| ENSG00000106367 | 379.6395023 | 0.240938564  | 0.105149525 | 2.29138993   | 0.021940871 | 0.062263317 |
| ENSG00000106392 | 154.8866826 | -0.195879179 | 0.146176006 | -1.340022793 | 0.180237935 | 0.326473536 |
| ENSG00000106397 | 595.0602041 | 0.490385457  | 0.085281282 | 5.750212067  | 8.91E-09    | 1.10E-07    |
| ENSG00000106399 | 140.6817687 | -0.228925621 | 0.152532351 | -1.50083323  | 0.133398702 | 0.261750019 |
| ENSG00000106400 | 339.1635855 | 0.349300008  | 0.117131049 | 2.982129936  | 0.002862505 | 0.011098428 |
| ENSG00000106404 | 42.64532107 | 0.377058364  | 0.274864409 | 1.371797699  | 0.170126424 | 0.313042425 |
| ENSG00000106415 | 42.93339182 | 0.41395868   | 0.269103243 | 1.538289454  | 0.123977857 | 0.248044005 |
| ENSG00000106436 | 17.3816961  | 0.949394126  | 0.451017209 | 2.105006433  | 0.035290748 | 0.09202323  |
| ENSG00000106443 | 952.7655835 | -0.017631475 | 0.076207088 | -0.231362666 | 0.817033066 | 0.892446616 |
| ENSG00000106459 | 141.9922011 | 0.259044093  | 0.151688176 | 1.707740841  | 0.087684441 | 0.189347169 |
| ENSG00000106460 | 273.7505045 | 0.05075166   | 0.120855989 | 0.419935     | 0.674532939 | 0.792834423 |
| ENSG00000106462 | 462.0157113 | 0.432389344  | 0.09372977  | 4.613148464  | 3.97E-06    | 3.10E-05    |
| ENSG00000106477 | 124.2152076 | 0.280016304  | 0.165805883 | 1.688820074  | 0.091253916 | 0.19555206  |
| ENSG00000106479 | 86.06685056 | 0.334289956  | 0.200611911 | 1.666351487  | 0.095643427 | 0.202792939 |
| ENSG00000106484 | 462.3610238 | -1.593444529 | 0.109971673 | -14.48959075 | 1.41E-47    | 1.39E-45    |
| ENSG00000106511 | 64.79630428 | 2.189682127  | 0.253349579 | 8.642927828  | 5.48E-18    | 1.64E-16    |
| ENSG00000106524 | 72.262358   | -0.083361418 | 0.206230336 | -0.404215112 | 0.686054542 | 0.801843308 |
| ENSG00000106537 | 57.31930503 | 0.831893881  | 0.240765789 | 3.455199691  | 0.000549885 | 0.00263806  |
| ENSG00000106546 | 9.571683561 | -3.286340573 | 0.786489021 | -4.17849517  | 2.93E-05    | 0.000189867 |
| ENSG00000106554 | 707.417999  | 0.564440985  | 0.082089519 | 6.875920236  | 6.16E-12    | 1.11E-10    |
| ENSG00000106571 | 318.2577553 | -0.818494431 | 0.116803396 | -7.007454046 | 2.43E-12    | 4.65E-11    |
| ENSG00000106588 | 26.69655652 | 0.302364197  | 0.339607027 | 0.890335516  | 0.373285756 | 0.54348518  |
| ENSG00000106591 | 296.7994107 | -0.278136567 | 0.120175395 | -2.314421906 | 0.02064459  | 0.059303591 |
| ENSG00000106603 | 299.1983321 | -0.259223589 | 0.123633481 | -2.096710274 | 0.03601923  | 0.093640149 |
| ENSG00000106605 | 165.7355645 | -0.168690686 | 0.142547471 | -1.183400058 | 0.236650634 | 0.397778085 |
| ENSG00000106608 | 283.8563598 | 0.164096417  | 0.117449214 | 1.397169145  | 0.162362713 | 0.302361001 |
| ENSG00000106609 | 598.086414  | 0.114817331  | 0.088885138 | 1.291749481  | 0.196443916 | 0.347660494 |
| ENSG00000106615 | 440.2927462 | 0.781672766  | 0.115719836 | 6.754872759  | 1.43E-11    | 2.48E-10    |
| ENSG00000106617 | 176.1426564 | 0.500116436  | 0.137646768 | 3.633332199  | 0.000279784 | 0.001446497 |
| ENSG00000106628 | 1224.946119 | 0.317660866  | 0.068473249 | 4.639196631  | 3.50E-06    | 2.78E-05    |
| ENSG00000106635 | 329.8352052 | -0.015519222 | 0.116639947 | -0.133052373 | 0.894151961 | 0.942712147 |
| ENSG00000106636 | 332.7900609 | 0.168048207  | 0.108983111 | 1.541965593  | 0.123081955 | 0.246814021 |
| ENSG00000106638 | 242.9923935 | -0.046936157 | 0.118731161 | -0.395314565 | 0.692610751 | 0.806457495 |
| ENSG00000106665 | 142.3835489 | -0.17835919  | 0.154366939 | -1.155423506 | 0.247917041 | 0.412129074 |
| ENSG00000106682 | 998.0735439 | 0.237726536  | 0.072431408 | 3.282091906  | 0.0010304   | 0.004616916 |
| ENSG00000106683 | 454.6226334 | 0.459213396  | 0.09532038  | 4.817578329  | 1.45E-06    | 1.24E-05    |
| ENSG00000106686 | 15.78776853 | 0.309179859  | 0.445032    | 0.694736241  | 0.487220612 | 0.647676578 |
| ENSG00000106688 | 16.63392945 | 1.976165708  | 0.482847879 | 4.092729394  | 4.26E-05    | 0.000266396 |
| ENSG00000106692 | 269.3973461 | -0.058072546 | 0.118651882 | -0.489436367 | 0.624532795 | 0.756146541 |
| ENSG00000106701 | 42.7008077  | -0.210279119 | 0.269378886 | -0.780607279 | 0.43503351  | 0.601231376 |
| ENSG00000106714 | 29.53562906 | -0.789933766 | 0.32656659  | -2.418905638 | 0.015567278 | 0.047006353 |
| ENSG00000106723 | 546.3939155 | -0.085537265 | 0.09064118  | -0.943690984 | 0.345327583 | 0.517089495 |
| ENSG00000106733 | 24.47662419 | 0.417094912  | 0.357986423 | 1.165113772  | 0.243972943 | 0.407162638 |
| ENSG00000106771 | 446.6751441 | -0.236341499 | 0.096137183 | -2.458377608 | 0.013956634 | 0.042768071 |
| ENSG00000106780 | 86.29908559 | 0.069709587  | 0.191744457 | 0.363554641  | 0.716190604 | 0.823334922 |

|                 |             |              |             |              |             |             |
|-----------------|-------------|--------------|-------------|--------------|-------------|-------------|
| ENSG00000106785 | 583.3493649 | 0.2887108    | 0.091105659 | 3.168966698  | 0.001529819 | 0.006494219 |
| ENSG00000106789 | 20.84017038 | -1.384211905 | 0.405388897 | -3.41452841  | 0.000638925 | 0.003010729 |
| ENSG00000106799 | 223.0670905 | -0.48335114  | 0.125087711 | -3.864097715 | 0.000111501 | 0.000635653 |
| ENSG00000106803 | 197.0760163 | 0.229640722  | 0.142746565 | 1.608730275  | 0.107675333 | 0.222330648 |
| ENSG00000106804 | 57.36319664 | -2.391774247 | 0.281206066 | -8.505414828 | 1.81E-17    | 5.17E-16    |
| ENSG00000106829 | 1054.79245  | 0.553866653  | 0.070933441 | 7.80825863   | 5.80E-15    | 1.39E-13    |
| ENSG00000106852 | 124.7343863 | 0.417256874  | 0.162864313 | 2.561990822  | 0.010407407 | 0.033384984 |
| ENSG00000106853 | 392.1972176 | -0.160334928 | 0.098814688 | -1.622581948 | 0.104678802 | 0.217357448 |
| ENSG00000106948 | 211.3459942 | -0.285635141 | 0.130121854 | -2.195135811 | 0.028153857 | 0.076509427 |
| ENSG00000106976 | 419.4609526 | 0.048961223  | 0.105119967 | 0.465765209  | 0.641383571 | 0.768467675 |
| ENSG00000106991 | 366.3405602 | 2.397377588  | 0.119539142 | 20.05516811  | 1.82E-89    | 3.99E-87    |
| ENSG00000106992 | 20.81059902 | 0.623207892  | 0.405958157 | 1.535153024  | 0.124746244 | 0.249049246 |
| ENSG00000106993 | 56.00429795 | 0.056359675  | 0.23974168  | 0.23508501   | 0.814142753 | 0.890857104 |
| ENSG00000107020 | 57.16187372 | -0.7022001   | 0.250505646 | -2.803130828 | 0.005060914 | 0.018087784 |
| ENSG00000107021 | 130.5831061 | 0.251083945  | 0.159483453 | 1.574357342  | 0.11540486  | 0.234315968 |
| ENSG00000107036 | 373.2075984 | -0.452737737 | 0.105020378 | -4.310951309 | 1.63E-05    | 0.000111331 |
| ENSG00000107077 | 336.7066217 | 0.079627995  | 0.112239989 | 0.709444076  | 0.478048944 | 0.638443955 |
| ENSG00000107099 | 61.32741192 | -2.599990706 | 0.280073721 | -9.283236919 | 1.64E-20    | 5.67E-19    |
| ENSG00000107104 | 668.3670499 | 0.170016267  | 0.087112286 | 1.951691038  | 0.050974897 | 0.123690514 |
| ENSG00000107130 | 409.6333608 | 0.425428309  | 0.106714031 | 3.986620164  | 6.70E-05    | 0.00040147  |
| ENSG00000107140 | 169.4401846 | -0.038138404 | 0.157733226 | -0.241790551 | 0.808942461 | 0.887127391 |
| ENSG00000107159 | 32.20131314 | 4.737570351  | 0.573323706 | 8.263342857  | 1.42E-16    | 3.80E-15    |
| ENSG00000107164 | 756.1249057 | -0.107860519 | 0.078310723 | -1.377340353 | 0.168407045 | 0.310733451 |
| ENSG00000107165 | 677.0682028 | -0.028954633 | 0.086142762 | -0.336123805 | 0.736777508 | 0.838085161 |
| ENSG00000107175 | 168.7234125 | 0.297294988  | 0.138553778 | 2.145701065  | 0.031896836 | 0.084585513 |
| ENSG00000107185 | 341.1712748 | 0.053202523  | 0.106755347 | 0.498359327  | 0.618230799 | 0.75188641  |
| ENSG00000107186 | 961.0932255 | 0.09118859   | 0.073363358 | 1.242971862  | 0.213878202 | 0.369492942 |
| ENSG00000107201 | 22.00406235 | 1.019275145  | 0.389184943 | 2.618999435  | 0.008818809 | 0.029024793 |
| ENSG00000107223 | 1542.977035 | 0.342555701  | 0.069567143 | 4.924101926  | 8.47E-07    | 7.63E-06    |
| ENSG00000107262 | 303.2281884 | 0.271164518  | 0.108254699 | 2.504875277  | 0.012249458 | 0.038339603 |
| ENSG00000107263 | 443.6593826 | 0.088738071  | 0.096176491 | 0.922658648  | 0.356185122 | 0.527443855 |
| ENSG00000107281 | 505.1842144 | 0.925214348  | 0.09662772  | 9.575040698  | 1.02E-21    | 3.76E-20    |
| ENSG00000107290 | 1382.008633 | 0.002539197  | 0.071485129 | 0.035520627  | 0.971664599 | 0.985302874 |
| ENSG00000107331 | 1030.697207 | -0.015942188 | 0.088163157 | -0.180825971 | 0.856504178 | 0.917790387 |
| ENSG00000107338 | 25.10654184 | 0.025645101  | 0.357004    | 0.071834212  | 0.942733846 | 0.968520046 |
| ENSG00000107341 | 697.2989301 | 0.07402655   | 0.079573822 | 0.930287717  | 0.352222136 | 0.523715899 |
| ENSG00000107362 | 67.98927524 | -0.750102205 | 0.22137906  | -3.388315979 | 0.000703232 | 0.003285101 |
| ENSG00000107371 | 152.6515676 | 0.072074686  | 0.145366875 | 0.495812309  | 0.62002684  | 0.753353258 |
| ENSG00000107372 | 611.8141277 | 0.319713248  | 0.085921912 | 3.720974535  | 0.000198455 | 0.001063197 |
| ENSG00000107404 | 393.8830026 | 0.019995308  | 0.099963497 | 0.200026095  | 0.841460173 | 0.907833414 |
| ENSG00000107438 | 30.19361891 | -0.961407372 | 0.328207697 | -2.92926516  | 0.003397644 | 0.012864343 |
| ENSG00000107443 | 183.4895765 | -0.47152741  | 0.144791339 | -3.256599547 | 0.001127554 | 0.0049933   |
| ENSG00000107518 | 279.2524563 | 0.243268365  | 0.116727894 | 2.084063691  | 0.037154374 | 0.095956517 |
| ENSG00000107521 | 111.9524406 | -0.33378799  | 0.174797285 | -1.909571936 | 0.056188351 | 0.133653282 |
| ENSG00000107537 | 103.7296956 | -0.742614207 | 0.178097956 | -4.169695278 | 3.05E-05    | 0.000196805 |
| ENSG00000107551 | 17.86333603 | -1.435365021 | 0.440770322 | -3.256491985 | 0.001127981 | 0.004993618 |
| ENSG00000107554 | 174.762841  | -0.061970247 | 0.137930519 | -0.449285969 | 0.653225378 | 0.77746328  |
| ENSG00000107560 | 229.0697293 | 0.269949084  | 0.127507891 | 2.117116683  | 0.034249946 | 0.089876517 |
| ENSG00000107566 | 356.5721098 | 0.323717286  | 0.106442817 | 3.041231866  | 0.002356123 | 0.009388963 |
| ENSG00000107581 | 8819.25433  | 0.196714635  | 0.050787183 | 3.873312559  | 0.000107366 | 0.000614827 |

|                 |             |              |             |              |             |             |
|-----------------|-------------|--------------|-------------|--------------|-------------|-------------|
| ENSG00000107611 | 53.96068089 | 0.164492518  | 0.247059734 | 0.665800598  | 0.505538563 | 0.663115154 |
| ENSG00000107614 | 76.88289885 | -0.373135458 | 0.221130221 | -1.687401464 | 0.091526182 | 0.195986019 |
| ENSG00000107625 | 278.3276244 | 0.113686835  | 0.117124303 | 0.970651113  | 0.331722044 | 0.504187357 |
| ENSG00000107643 | 253.8928927 | -0.112368699 | 0.126051825 | -0.89144841  | 0.372688657 | 0.543151359 |
| ENSG00000107651 | 524.6183557 | 0.183103531  | 0.094737041 | 1.932755434  | 0.053266333 | 0.128100013 |
| ENSG00000107669 | 316.5533361 | 0.032538835  | 0.108981069 | 0.298573275  | 0.765265659 | 0.858571124 |
| ENSG00000107672 | 192.1225086 | 0.020919729  | 0.133884186 | 0.156252428  | 0.875834053 | 0.931201069 |
| ENSG00000107679 | 166.3753496 | -0.207661935 | 0.145417326 | -1.428041221 | 0.153279994 | 0.28985747  |
| ENSG00000107719 | 303.2232429 | 0.154868862  | 0.111015581 | 1.395019156  | 0.163010063 | 0.30328508  |
| ENSG00000107731 | 97.01345388 | -0.455297776 | 0.183599696 | -2.479839486 | 0.013144154 | 0.040713546 |
| ENSG00000107742 | 141.2403652 | -2.992391993 | 0.211071923 | -14.17712008 | 1.27E-45    | 1.17E-43    |
| ENSG00000107745 | 434.2438311 | 0.427625894  | 0.098311539 | 4.34970198   | 1.36E-05    | 9.50E-05    |
| ENSG00000107758 | 235.6069157 | 0.295442956  | 0.122148685 | 2.418715817  | 0.015575403 | 0.04702078  |
| ENSG00000107771 | 316.7272368 | 0.044776466  | 0.11022744  | 0.406218871  | 0.68458179  | 0.800759464 |
| ENSG00000107779 | 221.4344497 | 0.312229028  | 0.131410584 | 2.375980824  | 0.017502372 | 0.051857377 |
| ENSG00000107789 | 125.5736662 | -0.723542739 | 0.171242644 | -4.225248581 | 2.39E-05    | 0.000157848 |
| ENSG00000107796 | 196.3146979 | -0.15320834  | 0.145301678 | -1.054415486 | 0.291692735 | 0.462252691 |
| ENSG00000107798 | 620.0694092 | 0.310400993  | 0.085789662 | 3.618163159  | 0.000296701 | 0.00152442  |
| ENSG00000107815 | 307.1816114 | 0.154344176  | 0.109047777 | 1.415381224  | 0.156956752 | 0.29483438  |
| ENSG00000107816 | 439.4947586 | -0.032600628 | 0.116708189 | -0.279334534 | 0.779988106 | 0.868394424 |
| ENSG00000107819 | 55.28877738 | -0.218583692 | 0.251854211 | -0.867897706 | 0.385450335 | 0.554301889 |
| ENSG00000107821 | 295.5891091 | -0.39046225  | 0.120376632 | -3.243671509 | 0.001179997 | 0.00518306  |
| ENSG00000107829 | 178.4885685 | -0.237095779 | 0.150678074 | -1.573525411 | 0.115597209 | 0.234516753 |
| ENSG00000107833 | 451.2193646 | 0.814525381  | 0.117146167 | 6.95306897   | 3.57E-12    | 6.69E-11    |
| ENSG00000107854 | 609.2376527 | 0.058342107  | 0.08914212  | 0.654484172  | 0.512799921 | 0.668768034 |
| ENSG00000107862 | 1075.403198 | 0.073995889  | 0.070604951 | 1.048026909  | 0.294626209 | 0.464881456 |
| ENSG00000107863 | 318.8359213 | -0.181108031 | 0.110588759 | -1.63767125  | 0.101490291 | 0.212147934 |
| ENSG00000107864 | 108.1328697 | -0.273606954 | 0.173766736 | -1.574564613 | 0.115356976 | 0.234266221 |
| ENSG00000107872 | 133.8712704 | 0.717578368  | 0.156550473 | 4.583687008  | 4.57E-06    | 3.53E-05    |
| ENSG00000107874 | 296.1850399 | -0.337262614 | 0.11229292  | -3.003418336 | 0.002669652 | 0.010451672 |
| ENSG00000107882 | 137.0070083 | -0.1040166   | 0.158750417 | -0.65522096  | 0.512325502 | 0.668273407 |
| ENSG00000107890 | 372.6887842 | -0.286207129 | 0.104000779 | -2.751970997 | 0.005923777 | 0.020637721 |
| ENSG00000107897 | 249.9966129 | 0.249617697  | 0.125613036 | 1.987195798  | 0.046900703 | 0.116049706 |
| ENSG00000107902 | 159.1573291 | -0.463254203 | 0.14739789  | -3.142882181 | 0.001672932 | 0.007021115 |
| ENSG00000107929 | 1061.88298  | 0.019636806  | 0.071678613 | 0.273956274  | 0.784118225 | 0.871011269 |
| ENSG00000107937 | 1112.734695 | -0.022179413 | 0.073654483 | -0.301127811 | 0.763317034 | 0.857280464 |
| ENSG00000107938 | 278.9890929 | -0.405112827 | 0.118504674 | -3.418538816 | 0.000629583 | 0.002974691 |
| ENSG00000107949 | 573.7734287 | 0.258601195  | 0.088202865 | 2.931891102  | 0.003369049 | 0.01276984  |
| ENSG00000107951 | 204.6478084 | -0.036364697 | 0.128279491 | -0.283480208 | 0.776808751 | 0.866224699 |
| ENSG00000107957 | 1277.473828 | -0.232020763 | 0.073003692 | -3.178205866 | 0.001481895 | 0.006327106 |
| ENSG00000107959 | 384.7279638 | 0.029104078  | 0.103125668 | 0.282219536  | 0.77777518  | 0.86696492  |
| ENSG00000107960 | 22.36719564 | 0.272442728  | 0.375214338 | 0.726098926  | 0.467778128 | 0.629756504 |
| ENSG00000107968 | 11.86118267 | -1.701782562 | 0.593772155 | -2.866053161 | 0.004156244 | 0.015311554 |
| ENSG00000107984 | 811.7001509 | -2.298466365 | 0.091068541 | -25.23886234 | 1.50E-140   | 7.03E-138   |
| ENSG00000108010 | 321.8150009 | 0.352918416  | 0.113836725 | 3.100215819  | 0.001933797 | 0.007952003 |
| ENSG00000108021 | 1194.873782 | 0.070392506  | 0.070734343 | 0.995167311  | 0.319654898 | 0.491322064 |
| ENSG00000108039 | 473.6874442 | 0.270676644  | 0.097442681 | 2.777803758  | 0.005472766 | 0.019301015 |
| ENSG00000108055 | 1516.535822 | 0.129495119  | 0.070686814 | 1.831955796  | 0.066958007 | 0.153661023 |
| ENSG00000108061 | 240.1846321 | -0.244622984 | 0.124322723 | -1.967644987 | 0.0491089   | 0.120234286 |
| ENSG00000108064 | 413.5847455 | -0.166807476 | 0.108862826 | -1.53227214  | 0.125455293 | 0.250109353 |

|                 |             |              |             |              |             |             |
|-----------------|-------------|--------------|-------------|--------------|-------------|-------------|
| ENSG00000108091 | 811.5693887 | 0.149978286  | 0.07738214  | 1.938151181  | 0.052604781 | 0.126921909 |
| ENSG00000108094 | 283.2396032 | -0.0534321   | 0.118314703 | -0.451609973 | 0.651549984 | 0.776080949 |
| ENSG00000108100 | 340.4263517 | -0.091171188 | 0.105725078 | -0.862342117 | 0.388499283 | 0.55708957  |
| ENSG00000108106 | 678.4493886 | 0.099598772  | 0.169322808 | 0.588218286  | 0.556385785 | 0.703406635 |
| ENSG00000108107 | 9677.684438 | 0.058313645  | 0.076545875 | 0.761813037  | 0.446171598 | 0.611152846 |
| ENSG00000108175 | 1877.008738 | 0.26139129   | 0.070785517 | 3.692722767  | 0.000221866 | 0.0011734   |
| ENSG00000108179 | 341.5858566 | -0.044459446 | 0.106439458 | -0.417697039 | 0.676168637 | 0.794177656 |
| ENSG00000108187 | 18.30432371 | -0.874490101 | 0.41909525  | -2.086614202 | 0.036923022 | 0.095517071 |
| ENSG00000108219 | 226.8959704 | -0.048641071 | 0.126158456 | -0.385555376 | 0.699825987 | 0.811562424 |
| ENSG00000108239 | 136.1489407 | -0.229934758 | 0.154979423 | -1.483647008 | 0.137902591 | 0.26792776  |
| ENSG00000108256 | 1871.247094 | -0.075963559 | 0.062572911 | -1.214000719 | 0.22474745  | 0.382809194 |
| ENSG00000108262 | 645.1054568 | 0.348355084  | 0.082173789 | 4.239248171  | 2.24E-05    | 0.000149233 |
| ENSG00000108298 | 7046.821611 | 0.300881075  | 0.05578411  | 5.393669884  | 6.90E-08    | 7.45E-07    |
| ENSG00000108306 | 366.9124487 | -0.149705062 | 0.104184897 | -1.436917117 | 0.150741546 | 0.286182794 |
| ENSG00000108309 | 63.10715118 | -0.329517337 | 0.224164995 | -1.469976777 | 0.141568044 | 0.273170733 |
| ENSG00000108312 | 1834.021382 | 0.150221972  | 0.062872612 | 2.389306998  | 0.01688019  | 0.050257744 |
| ENSG00000108344 | 872.0453113 | 0.381475049  | 0.077900142 | 4.89697504   | 9.73E-07    | 8.63E-06    |
| ENSG00000108349 | 1198.818788 | 0.151967137  | 0.069149998 | 2.197644832  | 0.027974426 | 0.076110161 |
| ENSG00000108352 | 76.31025818 | 0.673096505  | 0.20395796  | 3.300172768  | 0.000966253 | 0.004354494 |
| ENSG00000108370 | 34.20129022 | -0.458912869 | 0.314515645 | -1.459109828 | 0.144534882 | 0.277398754 |
| ENSG00000108379 | 51.42932803 | -0.573492442 | 0.249015892 | -2.303035505 | 0.021276846 | 0.060752394 |
| ENSG00000108384 | 264.6416704 | -0.118243226 | 0.118500392 | -0.997829826 | 0.318361885 | 0.48997802  |
| ENSG00000108389 | 520.2953362 | 0.49635124   | 0.092030661 | 5.393324762  | 6.92E-08    | 7.46E-07    |
| ENSG00000108395 | 487.5856397 | 0.009462665  | 0.092703088 | 0.102074968  | 0.91869717  | 0.955355281 |
| ENSG00000108406 | 216.5628444 | 0.112239271  | 0.127368971 | 0.881213606  | 0.378202216 | 0.547522058 |
| ENSG00000108423 | 107.2966845 | -0.405266568 | 0.175973119 | -2.303002698 | 0.021278691 | 0.060752394 |
| ENSG00000108424 | 3551.163539 | 0.155751039  | 0.055319936 | 2.81545951   | 0.004870753 | 0.017507542 |
| ENSG00000108433 | 193.2296046 | -0.039032128 | 0.135340949 | -0.288398514 | 0.773041705 | 0.864018874 |
| ENSG00000108439 | 208.5956204 | 0.225528032  | 0.14789521  | 1.524917759  | 0.127279612 | 0.252485707 |
| ENSG00000108443 | 798.4365092 | -0.15065484  | 0.077530672 | -1.943164385 | 0.0519963   | 0.125743187 |
| ENSG00000108465 | 35.38531291 | -0.34718382  | 0.311461741 | -1.114691707 | 0.264982556 | 0.431693045 |
| ENSG00000108468 | 896.2341931 | -0.302151023 | 0.086070791 | -3.510494327 | 0.000447274 | 0.002194503 |
| ENSG00000108469 | 190.8959388 | -0.172240012 | 0.136216818 | -1.264454815 | 0.206066829 | 0.359535554 |
| ENSG00000108474 | 74.30923366 | -0.150258199 | 0.213511575 | -0.70374732  | 0.481590146 | 0.642074486 |
| ENSG00000108479 | 256.7819141 | 0.004320979  | 0.135952185 | 0.031783078  | 0.974645041 | 0.987011672 |
| ENSG00000108506 | 300.861491  | -0.276163411 | 0.11242419  | -2.456441193 | 0.014032077 | 0.042943046 |
| ENSG00000108509 | 332.8035454 | 0.573376192  | 0.107895735 | 5.314169198  | 1.07E-07    | 1.12E-06    |
| ENSG00000108510 | 1136.660937 | -0.180636605 | 0.077531079 | -2.329860583 | 0.019813521 | 0.057326576 |
| ENSG00000108511 | 451.6210196 | -0.053777749 | 0.095598473 | -0.562537743 | 0.573749696 | 0.718312119 |
| ENSG00000108515 | 127.2341036 | -2.019748926 | 0.186663852 | -10.82024666 | 2.76E-27    | 1.35E-25    |
| ENSG00000108518 | 4674.96535  | -0.135522702 | 0.074965764 | -1.807794581 | 0.070638478 | 0.160170895 |
| ENSG00000108523 | 406.8610736 | 0.041863447  | 0.100880333 | 0.414981252  | 0.678155628 | 0.795757928 |
| ENSG00000108528 | 363.8811547 | -0.00596702  | 0.103615262 | -0.057588233 | 0.954076623 | 0.974968305 |
| ENSG00000108557 | 1151.101522 | -0.146463414 | 0.075770541 | -1.932986242 | 0.053237893 | 0.128053541 |
| ENSG00000108559 | 545.5559914 | 0.285678809  | 0.088512366 | 3.227558159  | 0.001248517 | 0.005451636 |
| ENSG00000108561 | 1391.673282 | 0.229018838  | 0.068468144 | 3.344896232  | 0.000823134 | 0.003776146 |
| ENSG00000108578 | 418.5140099 | -0.085345775 | 0.097680314 | -0.873725435 | 0.382267796 | 0.551702017 |
| ENSG00000108582 | 1039.001557 | -0.013984025 | 0.074948762 | -0.186581138 | 0.851989056 | 0.915116247 |
| ENSG00000108587 | 283.3175056 | 0.007448336  | 0.117838371 | 0.063208066  | 0.949600822 | 0.972060789 |
| ENSG00000108588 | 774.7318795 | 0.314699734  | 0.080415324 | 3.91342991   | 9.10E-05    | 0.000528618 |

|                 |             |              |             |              |             |             |
|-----------------|-------------|--------------|-------------|--------------|-------------|-------------|
| ENSG00000108590 | 83.35416674 | 0.553123491  | 0.194379612 | 2.845583885  | 0.004433008 | 0.016169947 |
| ENSG00000108591 | 209.1734878 | 0.417498745  | 0.130609165 | 3.196550137  | 0.001390817 | 0.005987374 |
| ENSG00000108592 | 936.7459106 | 0.038198787  | 0.072706192 | 0.525385613  | 0.599315153 | 0.737889382 |
| ENSG00000108599 | 285.528215  | -0.008941509 | 0.120109829 | -0.074444438 | 0.940656751 | 0.967262249 |
| ENSG00000108604 | 779.1526689 | 0.319202439  | 0.084511067 | 3.777048974  | 0.000158698 | 0.000871812 |
| ENSG00000108639 | 216.2060272 | 0.211192852  | 0.131305916 | 1.608403179  | 0.107746906 | 0.222413047 |
| ENSG00000108641 | 88.80560831 | 0.250934636  | 0.186444917 | 1.345891537  | 0.178337499 | 0.324033998 |
| ENSG00000108651 | 239.1976402 | -0.001947067 | 0.121613307 | -0.016010311 | 0.987226166 | 0.993349947 |
| ENSG00000108654 | 6267.959903 | -0.031579972 | 0.05116577  | -0.617208968 | 0.537096901 | 0.68781112  |
| ENSG00000108666 | 80.13648584 | 0.077075967  | 0.196458002 | 0.392327961  | 0.694815906 | 0.808422019 |
| ENSG00000108669 | 442.2479017 | 0.351190918  | 0.095456498 | 3.67906768   | 0.000234088 | 0.001229707 |
| ENSG00000108671 | 614.0293279 | 0.423360353  | 0.104409079 | 4.054823176  | 5.02E-05    | 0.000308703 |
| ENSG00000108679 | 181.3523655 | 2.212080054  | 0.185185738 | 11.9451966   | 6.88E-33    | 4.13E-31    |
| ENSG00000108733 | 20.52376878 | 0.313775425  | 0.381640128 | 0.822176186  | 0.41097663  | 0.579326515 |
| ENSG00000108771 | 13.15370416 | 2.145537482  | 0.543844178 | 3.945132762  | 7.98E-05    | 0.000469543 |
| ENSG00000108773 | 474.8415725 | 0.577552039  | 0.092873475 | 6.218697396  | 5.01E-10    | 7.25E-09    |
| ENSG00000108774 | 284.586813  | 0.277685505  | 0.129279448 | 2.147947795  | 0.031717903 | 0.084207405 |
| ENSG00000108784 | 47.34164176 | 0.482201774  | 0.268057893 | 1.798871762  | 0.072038968 | 0.162402726 |
| ENSG00000108786 | 120.3142475 | 1.438024154  | 0.176636827 | 8.141134437  | 3.92E-16    | 1.03E-14    |
| ENSG00000108788 | 347.2979796 | 0.25546267   | 0.116411695 | 2.194475989  | 0.028201208 | 0.076623283 |
| ENSG00000108797 | 645.4809635 | 0.41496791   | 0.085702289 | 4.841969963  | 1.29E-06    | 1.11E-05    |
| ENSG00000108799 | 189.0134602 | 0.597218356  | 0.137669445 | 4.338060299  | 1.44E-05    | 9.97E-05    |
| ENSG00000108819 | 2523.009511 | 0.22280387   | 0.067376901 | 3.306828686  | 0.000943586 | 0.004266534 |
| ENSG00000108821 | 83.24892244 | -2.012840454 | 0.230075068 | -8.748624848 | 2.16E-18    | 6.70E-17    |
| ENSG00000108823 | 102.8505563 | 0.038822339  | 0.175725942 | 0.220925483  | 0.825150455 | 0.897892048 |
| ENSG00000108826 | 438.1948393 | 0.191686462  | 0.097232804 | 1.971417618  | 0.048676127 | 0.119495554 |
| ENSG00000108828 | 601.4711553 | -0.078040038 | 0.087147065 | -0.89549818  | 0.370520838 | 0.541536387 |
| ENSG00000108829 | 1530.595374 | 0.249605607  | 0.072804869 | 3.428419171  | 0.000607107 | 0.002879148 |
| ENSG00000108830 | 162.982506  | -0.641166932 | 0.152400095 | -4.20712949  | 2.59E-05    | 0.000169768 |
| ENSG00000108840 | 403.8458369 | 0.491424636  | 0.100723617 | 4.878941491  | 1.07E-06    | 9.38E-06    |
| ENSG00000108848 | 2666.775811 | 0.191254977  | 0.067308634 | 2.841462768  | 0.00449071  | 0.016342227 |
| ENSG00000108852 | 181.5055785 | -0.34464155  | 0.138589091 | -2.486786995 | 0.012890255 | 0.040041887 |
| ENSG00000108854 | 306.1860077 | -0.34162913  | 0.116088669 | -2.942829247 | 0.003252277 | 0.012367575 |
| ENSG00000108861 | 317.3450719 | 0.116450117  | 0.106952876 | 1.088798362  | 0.276242814 | 0.444743015 |
| ENSG00000108883 | 1022.088936 | 0.010766657  | 0.070987865 | 0.151668985  | 0.879448021 | 0.933918276 |
| ENSG00000108932 | 19.21477326 | 0.13342366   | 0.401623062 | 0.332211151  | 0.739729824 | 0.840830623 |
| ENSG00000108946 | 1341.600062 | -0.159685251 | 0.068490245 | -2.331503594 | 0.019726821 | 0.057111426 |
| ENSG00000108947 | 73.01634094 | -0.917357636 | 0.219130145 | -4.186359834 | 2.83E-05    | 0.000184343 |
| ENSG00000108953 | 2707.716366 | -0.065465807 | 0.068506863 | -0.955609472 | 0.339269574 | 0.511070291 |
| ENSG00000108960 | 48.73938062 | -0.114498641 | 0.257567716 | -0.444538013 | 0.656653652 | 0.779779681 |
| ENSG00000108961 | 119.8379186 | 0.05710094   | 0.167084922 | 0.341748015  | 0.732540534 | 0.83529482  |
| ENSG00000108963 | 117.1028473 | 0.17519884   | 0.166033704 | 1.055200451  | 0.291333658 | 0.461787846 |
| ENSG00000108984 | 728.3759254 | -1.354473527 | 0.086297147 | -15.69546123 | 1.62E-55    | 1.97E-53    |
| ENSG00000109016 | 64.00350383 | -0.402948801 | 0.225847072 | -1.78416659  | 0.074396599 | 0.166382587 |
| ENSG00000109046 | 431.6994461 | 0.127043172  | 0.10163484  | 1.249996279  | 0.211300907 | 0.366298879 |
| ENSG00000109062 | 524.2339527 | -0.167800267 | 0.092434511 | -1.815342179 | 0.069471341 | 0.158111459 |
| ENSG00000109063 | 18.96960973 | 0.02331505   | 0.421055193 | 0.055372908  | 0.955841379 | 0.976345539 |
| ENSG00000109065 | 209.379058  | 0.357227585  | 0.132730417 | 2.691376958  | 0.007115774 | 0.024167137 |
| ENSG00000109066 | 169.7713885 | 0.184504703  | 0.141010208 | 1.308449271  | 0.19072097  | 0.340500441 |
| ENSG00000109079 | 164.250705  | -0.317997895 | 0.146283947 | -2.173839995 | 0.029717154 | 0.079898384 |

|                 |             |              |             |              |             |             |
|-----------------|-------------|--------------|-------------|--------------|-------------|-------------|
| ENSG00000109083 | 46.27210327 | 0.302324071  | 0.264025554 | 1.145056099  | 0.25218592  | 0.416857568 |
| ENSG00000109084 | 373.0972884 | -0.510298581 | 0.102090778 | -4.998478702 | 5.78E-07    | 5.38E-06    |
| ENSG00000109089 | 411.3503479 | 0.233101705  | 0.098143498 | 2.375111103  | 0.017543672 | 0.051924981 |
| ENSG00000109099 | 21.15814659 | 0.187845738  | 0.373348383 | 0.503137945  | 0.61486729  | 0.749417859 |
| ENSG00000109103 | 164.6384898 | 0.038270154  | 0.144938177 | 0.264044679  | 0.791745491 | 0.875713229 |
| ENSG00000109107 | 387.379874  | 0.622113578  | 0.109772364 | 5.667305985  | 1.45E-08    | 1.74E-07    |
| ENSG00000109111 | 2072.604581 | -1.31E-05    | 0.059188864 | -0.000222009 | 0.999822862 | 0.999954923 |
| ENSG00000109113 | 841.417919  | 0.088643145  | 0.076706093 | 1.155620654  | 0.247836356 | 0.412129074 |
| ENSG00000109118 | 580.7139698 | -0.214052484 | 0.086763199 | -2.467088419 | 0.013621672 | 0.041897005 |
| ENSG00000109133 | 662.7723332 | 0.141961386  | 0.0823574   | 1.723723495  | 0.084757772 | 0.184720248 |
| ENSG00000109171 | 604.7105646 | -0.063155554 | 0.084190937 | -0.750146708 | 0.453166351 | 0.617396281 |
| ENSG00000109180 | 814.1771143 | 0.081779765  | 0.076650987 | 1.066910784  | 0.286012125 | 0.455666589 |
| ENSG00000109184 | 219.6796736 | -0.067416465 | 0.126878437 | -0.531346904 | 0.595178408 | 0.734921862 |
| ENSG00000109189 | 174.5933988 | 0.022276469  | 0.13942061  | 0.159778883  | 0.873055259 | 0.929780684 |
| ENSG00000109220 | 22.77973965 | -0.035212835 | 0.359939772 | -0.097829797 | 0.922067446 | 0.956947278 |
| ENSG00000109265 | 111.4416801 | 0.816759656  | 0.187139438 | 4.364444321  | 1.27E-05    | 8.92E-05    |
| ENSG00000109270 | 95.56218757 | 0.007192902  | 0.195667449 | 0.036760849  | 0.970675691 | 0.984695705 |
| ENSG00000109320 | 545.1059708 | 0.540466674  | 0.091863895 | 5.883341576  | 4.02E-09    | 5.18E-08    |
| ENSG00000109323 | 176.1739883 | -0.055014841 | 0.136113514 | -0.404183536 | 0.686077759 | 0.801843308 |
| ENSG00000109332 | 1240.815227 | 0.201354677  | 0.071779378 | 2.805188394  | 0.005028718 | 0.017987879 |
| ENSG00000109339 | 70.65340495 | -0.919985982 | 0.223719312 | -4.112233198 | 3.92E-05    | 0.00024683  |
| ENSG00000109381 | 239.5238046 | -0.143958708 | 0.121523016 | -1.184620932 | 0.236167357 | 0.397355584 |
| ENSG00000109390 | 492.6476541 | 0.703181374  | 0.095817719 | 7.338740503  | 2.16E-13    | 4.56E-12    |
| ENSG00000109436 | 282.6621185 | 0.341183311  | 0.112515118 | 3.032333038  | 0.002426713 | 0.009634833 |
| ENSG00000109445 | 224.9671738 | 0.464711886  | 0.123670721 | 3.757654871  | 0.000171513 | 0.00093165  |
| ENSG00000109452 | 298.340583  | -0.362359251 | 0.120466502 | -3.007966907 | 0.002630018 | 0.010319514 |
| ENSG00000109458 | 160.719637  | -0.553042398 | 0.153797874 | -3.595904047 | 0.000323267 | 0.00164229  |
| ENSG00000109466 | 69.13415989 | 0.374278178  | 0.209836145 | 1.783668763  | 0.074477505 | 0.166484009 |
| ENSG00000109472 | 214.136994  | 0.671204385  | 0.133943629 | 5.011096005  | 5.41E-07    | 5.10E-06    |
| ENSG00000109475 | 1838.219373 | 0.445609666  | 0.072551954 | 6.141938836  | 8.15E-10    | 1.15E-08    |
| ENSG00000109501 | 155.2470555 | 0.18825332   | 0.146897304 | 1.281530127  | 0.200007525 | 0.352068384 |
| ENSG00000109519 | 455.2001422 | 0.214215957  | 0.093641851 | 2.287609173  | 0.022160291 | 0.062658134 |
| ENSG00000109534 | 276.9365661 | 0.584097919  | 0.146591238 | 3.984534997  | 6.76E-05    | 0.000404839 |
| ENSG00000109536 | 250.2575413 | -0.031523662 | 0.121399568 | -0.259668648 | 0.795119379 | 0.87776105  |
| ENSG00000109572 | 636.6802983 | 0.077535198  | 0.083441547 | 0.929215732  | 0.352777296 | 0.524165716 |
| ENSG00000109576 | 157.9333868 | 0.184615635  | 0.143025494 | 1.290788305  | 0.196777094 | 0.347995448 |
| ENSG00000109586 | 206.6615757 | -0.888356228 | 0.139361738 | -6.374462917 | 1.84E-10    | 2.80E-09    |
| ENSG00000109606 | 1180.220141 | 0.053079348  | 0.072862269 | 0.728488817  | 0.466314412 | 0.628880558 |
| ENSG00000109618 | 120.3400013 | -0.799344391 | 0.167891115 | -4.761088112 | 1.93E-06    | 1.61E-05    |
| ENSG00000109654 | 235.9187501 | -0.291675511 | 0.128368322 | -2.272176709 | 0.023075839 | 0.064855205 |
| ENSG00000109670 | 275.1001612 | -0.216849815 | 0.112767594 | -1.922979882 | 0.054482576 | 0.130481271 |
| ENSG00000109674 | 68.955627   | -0.106421751 | 0.211645029 | -0.502831328 | 0.615082866 | 0.749615566 |
| ENSG00000109680 | 13.9091691  | 0.285987198  | 0.470410687 | 0.60795217   | 0.543219197 | 0.692180702 |
| ENSG00000109685 | 1760.432975 | -0.082709526 | 0.062434462 | -1.324741554 | 0.185256886 | 0.333158811 |
| ENSG00000109686 | 200.898007  | -0.754468092 | 0.132771752 | -5.682444354 | 1.33E-08    | 1.61E-07    |
| ENSG00000109689 | 328.6739968 | 0.132855676  | 0.105593859 | 1.258176163  | 0.208328054 | 0.362714944 |
| ENSG00000109705 | 216.8329993 | 5.860206859  | 0.310001371 | 18.90380946  | 1.06E-79    | 1.94E-77    |
| ENSG00000109736 | 199.4819175 | 0.982687299  | 0.141065091 | 6.966197581  | 3.26E-12    | 6.11E-11    |
| ENSG00000109738 | 14.47177806 | 1.856482648  | 0.494296592 | 3.755807095  | 0.000172784 | 0.000937826 |
| ENSG00000109756 | 308.6579473 | -0.316822888 | 0.108269941 | -2.926231288 | 0.003430958 | 0.012974608 |

|                 |             |              |             |              |             |             |
|-----------------|-------------|--------------|-------------|--------------|-------------|-------------|
| ENSG00000109762 | 142.8761656 | 0.043457098  | 0.151384381 | 0.287064606  | 0.774062852 | 0.864738597 |
| ENSG00000109771 | 11.11617052 | -0.31924364  | 0.520318012 | -0.613554851 | 0.539509526 | 0.689580557 |
| ENSG00000109775 | 151.8158813 | 0.28389218   | 0.15304225  | 1.854992201  | 0.06359734  | 0.147490811 |
| ENSG00000109787 | 310.5217596 | 0.332271008  | 0.109535024 | 3.03346818   | 0.002417602 | 0.009606805 |
| ENSG00000109790 | 541.547219  | -0.734594789 | 0.090450688 | -8.121494798 | 4.60E-16    | 1.20E-14    |
| ENSG00000109794 | 95.60972588 | 0.052956116  | 0.194306575 | 0.272538981  | 0.785207623 | 0.871396457 |
| ENSG00000109805 | 394.342157  | 0.085992401  | 0.101527491 | 0.846986368  | 0.39700272  | 0.564900446 |
| ENSG00000109814 | 449.5461904 | 0.103918371  | 0.092882492 | 1.118815491  | 0.263218861 | 0.429734466 |
| ENSG00000109861 | 335.6194722 | 0.435451216  | 0.116929459 | 3.724050539  | 0.000196052 | 0.00105072  |
| ENSG00000109881 | 206.0360645 | -0.051607106 | 0.136331211 | -0.378542124 | 0.705027907 | 0.815025133 |
| ENSG00000109911 | 165.5041935 | -0.206914509 | 0.146411211 | -1.41324224  | 0.157584511 | 0.295736756 |
| ENSG00000109917 | 296.9820312 | 0.114303259  | 0.114707564 | 0.996475348  | 0.319019239 | 0.490506048 |
| ENSG00000109919 | 488.3601969 | 0.093417326  | 0.101066596 | 0.924314554  | 0.355322567 | 0.526906758 |
| ENSG00000109920 | 1044.971919 | 0.154854924  | 0.071818456 | 2.156199561  | 0.031068086 | 0.082842331 |
| ENSG00000109927 | 11.52487112 | -0.391426205 | 0.506711075 | -0.772484013 | 0.439827812 | 0.605118636 |
| ENSG00000109929 | 560.3300933 | 1.257921376  | 0.091586277 | 13.73482374  | 6.28E-43    | 5.38E-41    |
| ENSG00000109971 | 9665.767498 | 0.486174987  | 0.060895198 | 7.983798472  | 1.42E-15    | 3.59E-14    |
| ENSG00000110011 | 88.45727384 | -0.105012502 | 0.191226154 | -0.549153449 | 0.582900147 | 0.724986574 |
| ENSG00000110013 | 112.2751626 | -0.584710853 | 0.169726099 | -3.445026165 | 0.000571004 | 0.002724489 |
| ENSG00000110031 | 17.71618756 | -0.775600721 | 0.420666705 | -1.843741644 | 0.065220801 | 0.150559834 |
| ENSG00000110042 | 58.77838143 | -1.168978863 | 0.242146008 | -4.827578498 | 1.38E-06    | 1.19E-05    |
| ENSG00000110046 | 166.9719324 | -0.467766008 | 0.171965363 | -2.720117594 | 0.00652587  | 0.022412934 |
| ENSG00000110047 | 172.895951  | 0.186849284  | 0.14241744  | 1.311983162  | 0.189525816 | 0.338829423 |
| ENSG00000110048 | 525.3969622 | -0.168430775 | 0.092482177 | -1.821224154 | 0.06857279  | 0.156497479 |
| ENSG00000110057 | 66.74240488 | 1.081931361  | 0.225167989 | 4.804996333  | 1.55E-06    | 1.32E-05    |
| ENSG00000110060 | 78.60517702 | 0.22632969   | 0.196753224 | 1.150322652  | 0.250011004 | 0.413944434 |
| ENSG00000110063 | 182.2632172 | 0.094872054  | 0.145361477 | 0.652662977  | 0.513973576 | 0.669862756 |
| ENSG00000110066 | 427.0195359 | 0.015969997  | 0.102237148 | 0.156205428  | 0.875871099 | 0.931201069 |
| ENSG00000110074 | 159.8148368 | -0.363880642 | 0.151125719 | -2.407800895 | 0.016048931 | 0.048242956 |
| ENSG00000110075 | 1335.779432 | -0.052440649 | 0.067292807 | -0.779290554 | 0.435808578 | 0.601888024 |
| ENSG00000110080 | 49.33074707 | 0.114934182  | 0.246302287 | 0.466638713  | 0.640758385 | 0.768195995 |
| ENSG00000110090 | 988.7502804 | 0.53534615   | 0.073395603 | 7.293981192  | 3.01E-13    | 6.29E-12    |
| ENSG00000110092 | 3451.695048 | 0.424397743  | 0.057252555 | 7.412730165  | 1.24E-13    | 2.69E-12    |
| ENSG00000110104 | 431.4940919 | 0.321385961  | 0.107414514 | 2.992016142  | 0.002771416 | 0.010783956 |
| ENSG00000110107 | 617.6933056 | 0.34795388   | 0.097795026 | 3.557991584  | 0.000373701 | 0.001872105 |
| ENSG00000110108 | 787.0828522 | 0.636746145  | 0.090686942 | 7.021365292  | 2.20E-12    | 4.22E-11    |
| ENSG00000110171 | 59.23290214 | 0.399774178  | 0.227617788 | 1.756339792  | 0.079030407 | 0.174742661 |
| ENSG00000110172 | 483.5825115 | 0.338926515  | 0.093802826 | 3.613180205  | 0.000302464 | 0.001550061 |
| ENSG00000110200 | 133.8069978 | 0.656011687  | 0.156086156 | 4.202881932  | 2.64E-05    | 0.000172476 |
| ENSG00000110218 | 104.9560961 | 0.003195585  | 0.179076568 | 0.017844794  | 0.98576267  | 0.992622086 |
| ENSG00000110237 | 320.3399663 | 0.391105377  | 0.112080709 | 3.489497717  | 0.000483929 | 0.002352164 |
| ENSG00000110274 | 240.5820823 | -0.214168559 | 0.124494615 | -1.720303799 | 0.085377233 | 0.18573548  |
| ENSG00000110315 | 72.0525787  | -0.174362865 | 0.216227618 | -0.806385728 | 0.420020473 | 0.587769236 |
| ENSG00000110318 | 72.07634212 | 1.419172664  | 0.220640679 | 6.432053553  | 1.26E-10    | 1.96E-09    |
| ENSG00000110321 | 5571.696312 | 0.088018527  | 0.068575765 | 1.283522357  | 0.199309132 | 0.35123515  |
| ENSG00000110328 | 94.01795819 | 0.532991807  | 0.192962396 | 2.762153757  | 0.005742143 | 0.020079632 |
| ENSG00000110330 | 208.5311494 | -0.000589592 | 0.129206617 | -0.00456317  | 0.99635913  | 0.998279095 |
| ENSG00000110344 | 360.6755797 | -0.060631818 | 0.1157814   | -0.523674945 | 0.600504645 | 0.738900556 |
| ENSG00000110367 | 1949.044261 | -0.069553918 | 0.062861886 | -1.106456107 | 0.268529152 | 0.435669785 |
| ENSG00000110395 | 701.2656436 | -0.093509135 | 0.083424574 | -1.120882387 | 0.262337929 | 0.428598579 |



|                 |             |              |             |              |             |             |
|-----------------|-------------|--------------|-------------|--------------|-------------|-------------|
| ENSG00000110400 | 304.7350628 | -0.069242261 | 0.109037296 | -0.635032815 | 0.525407013 | 0.678660352 |
| ENSG00000110422 | 600.9836917 | 0.248244213  | 0.086946197 | 2.855147462  | 0.004301685 | 0.015760503 |
| ENSG00000110427 | 17.5360771  | -1.923152251 | 0.463481715 | -4.149359483 | 3.33E-05    | 0.000213852 |
| ENSG00000110429 | 72.93402371 | 0.349008001  | 0.218044509 | 1.600627336  | 0.109459484 | 0.225154103 |
| ENSG00000110435 | 333.2718395 | -0.136011821 | 0.104157057 | -1.305833945 | 0.191609034 | 0.34183689  |
| ENSG00000110442 | 67.77218521 | 0.305333297  | 0.213271291 | 1.431666191  | 0.152239376 | 0.288402768 |
| ENSG00000110446 | 22.25560937 | 3.527635415  | 0.528850577 | 6.670382087  | 2.55E-11    | 4.31E-10    |
| ENSG00000110492 | 5559.884918 | 0.584932383  | 0.137464422 | 4.255154712  | 2.09E-05    | 0.00013987  |
| ENSG00000110497 | 419.1951609 | -0.375684459 | 0.104543843 | -3.593558924 | 0.000326192 | 0.001654755 |
| ENSG00000110514 | 490.4372739 | 0.04622064   | 0.090363807 | 0.511495052  | 0.609004452 | 0.745246585 |
| ENSG00000110536 | 70.66761583 | -0.043760086 | 0.21832512  | -0.200435415 | 0.841140064 | 0.907697202 |
| ENSG00000110583 | 222.5631441 | -0.327766076 | 0.130921183 | -2.503537393 | 0.012295869 | 0.038467721 |
| ENSG00000110619 | 500.6289666 | -0.487109229 | 0.114303788 | -4.261531811 | 2.03E-05    | 0.000136262 |
| ENSG00000110628 | 81.8789556  | -0.423252332 | 0.198990412 | -2.126998617 | 0.033420198 | 0.088028037 |
| ENSG00000110651 | 545.3998684 | 0.547719519  | 0.092673839 | 5.910184851  | 3.42E-09    | 4.43E-08    |
| ENSG00000110660 | 229.6993669 | 0.192207933  | 0.123241542 | 1.559603437  | 0.118853624 | 0.239979424 |
| ENSG00000110696 | 924.5498226 | 0.008881812  | 0.07686814  | 0.115546083  | 0.908012296 | 0.950719195 |
| ENSG00000110697 | 182.7843377 | 0.004806446  | 0.14345107  | 0.033505825  | 0.973271221 | 0.986330341 |
| ENSG00000110700 | 2352.917919 | 0.214110081  | 0.078228988 | 2.736966016  | 0.00620087  | 0.021432977 |
| ENSG00000110711 | 343.9342656 | 0.261658377  | 0.105299026 | 2.484907858  | 0.012958497 | 0.040244972 |
| ENSG00000110713 | 1790.992447 | 0.152910511  | 0.068322891 | 2.238056795  | 0.025217352 | 0.069771152 |
| ENSG00000110717 | 702.4723567 | 0.170968961  | 0.101812946 | 1.679245783  | 0.093104153 | 0.19854775  |
| ENSG00000110719 | 114.4659277 | 1.285026514  | 0.18529114  | 6.935175185  | 4.06E-12    | 7.56E-11    |
| ENSG00000110721 | 221.0570244 | -0.463698164 | 0.133903522 | -3.462927311 | 0.000534333 | 0.00257047  |
| ENSG00000110723 | 81.34567158 | -1.800467674 | 0.219858354 | -8.189216556 | 2.63E-16    | 6.97E-15    |
| ENSG00000110756 | 119.7838506 | -0.202506219 | 0.166496074 | -1.216282246 | 0.223877422 | 0.382164648 |
| ENSG00000110768 | 190.8957001 | 0.125433727  | 0.138537039 | 0.905416542  | 0.365244755 | 0.536504557 |
| ENSG00000110801 | 44.25202057 | 0.128452159  | 0.261638932 | 0.490952008  | 0.623460392 | 0.755694894 |
| ENSG00000110811 | 328.5482066 | 0.825303102  | 0.137079225 | 6.020628592  | 1.74E-09    | 2.35E-08    |
| ENSG00000110841 | 346.8282512 | -0.000335506 | 0.105933759 | -0.003167132 | 0.997472999 | 0.99882401  |
| ENSG00000110844 | 118.8267531 | 0.077167218  | 0.169964594 | 0.454019369  | 0.649814886 | 0.774539644 |
| ENSG00000110851 | 198.179977  | -0.058040664 | 0.14210845  | -0.408425143 | 0.682961578 | 0.799479082 |
| ENSG00000110852 | 15.49307453 | 3.810422036  | 0.661124033 | 5.763550933  | 8.24E-09    | 1.02E-07    |
| ENSG00000110871 | 113.9645528 | -0.420233955 | 0.181861618 | -2.310734722 | 0.020847512 | 0.059751512 |
| ENSG00000110880 | 560.1415604 | -0.070150262 | 0.090221934 | -0.777530025 | 0.436846127 | 0.602891221 |
| ENSG00000110881 | 257.3084863 | 0.386166329  | 0.123705953 | 3.1216471    | 0.001798424 | 0.007461088 |
| ENSG00000110888 | 173.8467175 | 0.172068393  | 0.139826451 | 1.230585428  | 0.218477958 | 0.375499801 |
| ENSG00000110906 | 228.0862175 | 0.080774256  | 0.124095819 | 0.650902316  | 0.515109546 | 0.670845893 |
| ENSG00000110911 | 461.9734461 | 0.058539884  | 0.094075476 | 0.622265083  | 0.533767577 | 0.68517163  |
| ENSG00000110917 | 1194.035553 | -0.166985344 | 0.067962007 | -2.457039624 | 0.014008723 | 0.042890266 |
| ENSG00000110921 | 220.2940605 | 0.921395981  | 0.136918881 | 6.729502703  | 1.70E-11    | 2.93E-10    |
| ENSG00000110925 | 312.0519559 | 0.513921625  | 0.113748096 | 4.518067928  | 6.24E-06    | 4.69E-05    |
| ENSG00000110931 | 463.8004173 | 0.241406842  | 0.092145708 | 2.619838152  | 0.008797151 | 0.028973875 |
| ENSG00000110955 | 2988.267084 | 0.075067381  | 0.061288799 | 1.224814019  | 0.220645302 | 0.378391473 |
| ENSG00000110958 | 1659.057634 | 0.200684191  | 0.072624564 | 2.763310105  | 0.005721838 | 0.020018593 |
| ENSG00000110987 | 203.1268984 | -0.12358565  | 0.134267576 | -0.920442994 | 0.35734131  | 0.528654385 |
| ENSG00000111011 | 1242.366865 | -0.011103726 | 0.068452105 | -0.162211603 | 0.871139223 | 0.928186766 |
| ENSG00000111012 | 28.93396534 | -0.120542865 | 0.330327364 | -0.364919404 | 0.715171569 | 0.822500003 |
| ENSG00000111057 | 191.6759621 | 0.26705212   | 0.136605246 | 1.954918475  | 0.050592694 | 0.123018101 |
| ENSG00000111077 | 166.5739953 | -1.160088265 | 0.153648725 | -7.55026288  | 4.34E-14    | 9.89E-13    |

|                 |             |              |             |              |             |             |
|-----------------|-------------|--------------|-------------|--------------|-------------|-------------|
| ENSG00000111087 | 190.6704582 | 0.113277536  | 0.134197764 | 0.844108962  | 0.39860852  | 0.566726101 |
| ENSG00000111110 | 87.47350626 | -0.533368327 | 0.198868178 | -2.682019483 | 0.00731792  | 0.024763869 |
| ENSG00000111142 | 1589.943209 | 0.094349952  | 0.067853406 | 1.39049692   | 0.164378034 | 0.305344914 |
| ENSG00000111144 | 615.8256983 | -0.04087493  | 0.097862948 | -0.41767524  | 0.676184578 | 0.794177656 |
| ENSG00000111145 | 415.2809531 | 0.334758272  | 0.101446146 | 3.299861889  | 0.000967324 | 0.004357923 |
| ENSG00000111196 | 110.5855633 | 0.253871529  | 0.175299262 | 1.448217897  | 0.147556121 | 0.281757964 |
| ENSG00000111199 | 28.06464257 | -1.51716107  | 0.372619001 | -4.071614882 | 4.67E-05    | 0.00028955  |
| ENSG00000111203 | 167.9721288 | -0.080821191 | 0.150522547 | -0.536937437 | 0.59131083  | 0.732133279 |
| ENSG00000111206 | 1178.192109 | -0.066568501 | 0.068933074 | -0.965697556 | 0.334195543 | 0.505990311 |
| ENSG00000111224 | 65.58531854 | -0.37749407  | 0.227592679 | -1.658638901 | 0.097188578 | 0.204955405 |
| ENSG00000111229 | 421.6714708 | 0.280473946  | 0.096392145 | 2.909717849  | 0.003617552 | 0.013583467 |
| ENSG00000111231 | 89.20919376 | -0.030428179 | 0.196197044 | -0.155089896 | 0.876750447 | 0.931879051 |
| ENSG00000111237 | 432.27079   | 0.216869795  | 0.111386825 | 1.946996834  | 0.051535114 | 0.124748191 |
| ENSG00000111247 | 139.3718873 | 0.032158468  | 0.158138861 | 0.203355885  | 0.838856878 | 0.906138309 |
| ENSG00000111252 | 344.2153277 | -0.350554855 | 0.107640299 | -3.256725011 | 0.001127056 | 0.004992668 |
| ENSG00000111261 | 311.0527272 | 0.318056771  | 0.114576971 | 2.775922319  | 0.005504536 | 0.019398448 |
| ENSG00000111266 | 402.0261049 | 0.334288666  | 0.104160743 | 3.209353689  | 0.001330337 | 0.005755235 |
| ENSG00000111269 | 126.8822592 | -0.18572166  | 0.162844888 | -1.140481976 | 0.254085558 | 0.418964434 |
| ENSG00000111271 | 212.9145802 | -0.586888019 | 0.127474952 | -4.603947766 | 4.15E-06    | 3.22E-05    |
| ENSG00000111275 | 107.7443985 | -0.961438387 | 0.180391922 | -5.329719743 | 9.84E-08    | 1.04E-06    |
| ENSG00000111276 | 320.2851986 | -0.032986248 | 0.113515238 | -0.290588722 | 0.771365887 | 0.863328623 |
| ENSG00000111300 | 597.6594387 | 0.095135836  | 0.088112461 | 1.07970921   | 0.280271691 | 0.449067691 |
| ENSG00000111319 | 13.72686559 | -1.892633155 | 0.544137044 | -3.478228832 | 0.000504739 | 0.002442324 |
| ENSG00000111328 | 481.8060528 | 1.042622821  | 0.095438956 | 10.92449944  | 8.80E-28    | 4.38E-26    |
| ENSG00000111331 | 257.5761022 | 1.535104932  | 0.137143749 | 11.19340067  | 4.39E-29    | 2.29E-27    |
| ENSG00000111335 | 48.42808365 | 4.587930525  | 0.614936592 | 7.460818863  | 8.60E-14    | 1.89E-12    |
| ENSG00000111341 | 12.93925693 | -2.267104234 | 0.589090887 | -3.848479553 | 0.000118853 | 0.000674558 |
| ENSG00000111344 | 11.67884185 | -0.375169687 | 0.498866742 | -0.752043892 | 0.452024664 | 0.616884334 |
| ENSG00000111358 | 194.3479884 | 0.538268121  | 0.136025019 | 3.957125865  | 7.59E-05    | 0.000448658 |
| ENSG00000111361 | 580.4659516 | 1.22923143   | 0.092710586 | 13.25880341  | 4.01E-40    | 3.15E-38    |
| ENSG00000111364 | 408.1393904 | 0.604147861  | 0.108638165 | 5.561101491  | 2.68E-08    | 3.10E-07    |
| ENSG00000111371 | 2172.524685 | -0.210973062 | 0.066408937 | -3.176877571 | 0.001488699 | 0.006352293 |
| ENSG00000111404 | 268.7293325 | -0.375771689 | 0.127110855 | -2.95625176  | 0.003114028 | 0.011919005 |
| ENSG00000111412 | 253.2002793 | -0.116192918 | 0.118494698 | -0.980574827 | 0.326802453 | 0.498977615 |
| ENSG00000111424 | 126.9188127 | 1.021145635  | 0.161590872 | 6.319327454  | 2.63E-10    | 3.93E-09    |
| ENSG00000111445 | 352.9858216 | -0.265941742 | 0.109217248 | -2.434979328 | 0.01489264  | 0.045261125 |
| ENSG00000111450 | 104.8556326 | 0.002122607  | 0.176046433 | 0.012057087  | 0.99038007  | 0.994984182 |
| ENSG00000111481 | 772.1748449 | 0.166534395  | 0.079768314 | 2.087726162  | 0.036822543 | 0.095327362 |
| ENSG00000111530 | 810.1581323 | -0.022873726 | 0.081274145 | -0.281439145 | 0.778373598 | 0.867349986 |
| ENSG00000111540 | 522.3216852 | -0.034203699 | 0.092040295 | -0.371616571 | 0.710178349 | 0.818499776 |
| ENSG00000111554 | 43.25332357 | -0.440132959 | 0.278328138 | -1.581345534 | 0.113799054 | 0.231839783 |
| ENSG00000111581 | 358.1320265 | 0.032574243  | 0.107811548 | 0.30214057   | 0.762544906 | 0.856780379 |
| ENSG00000111596 | 539.2631409 | -0.168598051 | 0.091284632 | -1.846948903 | 0.064754546 | 0.149704923 |
| ENSG00000111602 | 1073.283257 | 0.003322649  | 0.070613668 | 0.047053913  | 0.962470258 | 0.980123222 |
| ENSG00000111605 | 804.6789616 | -0.355382234 | 0.083020925 | -4.280634455 | 1.86E-05    | 0.000125857 |
| ENSG00000111615 | 383.5649454 | -0.205238622 | 0.100526237 | -2.041642335 | 0.041187023 | 0.10456427  |
| ENSG00000111639 | 412.7480761 | 0.070053322  | 0.097618812 | 0.717621127  | 0.472990927 | 0.634281962 |
| ENSG00000111640 | 12455.22028 | 0.477844441  | 0.068875788 | 6.937770993  | 3.98E-12    | 7.43E-11    |
| ENSG00000111641 | 84.2547093  | 0.067938936  | 0.199431053 | 0.34066378   | 0.733356709 | 0.835693316 |
| ENSG00000111642 | 159.2954125 | -0.059378652 | 0.145567271 | -0.407912104 | 0.683338206 | 0.799704389 |

|                 |             |              |             |              |             |             |
|-----------------|-------------|--------------|-------------|--------------|-------------|-------------|
| ENSG00000111647 | 252.3202749 | 0.107514466  | 0.119858583 | 0.897010993  | 0.369713051 | 0.541059478 |
| ENSG00000111652 | 380.4509274 | 0.787378474  | 0.102119793 | 7.710341455  | 1.25E-14    | 2.94E-13    |
| ENSG00000111653 | 38.05962627 | -0.072947342 | 0.284219913 | -0.256658098 | 0.797442721 | 0.879045586 |
| ENSG00000111664 | 62.25968257 | 0.162178839  | 0.227150544 | 0.713970728  | 0.47524528  | 0.636211803 |
| ENSG00000111665 | 254.7398604 | 0.154118382  | 0.116404968 | 1.323984574  | 0.185508168 | 0.333439953 |
| ENSG00000111666 | 137.4091229 | 0.24820009   | 0.159634774 | 1.554799641  | 0.119993795 | 0.241899086 |
| ENSG00000111667 | 540.6281277 | 0.071111424  | 0.093464801 | 0.760836416  | 0.446754781 | 0.611772705 |
| ENSG00000111669 | 1288.48108  | 0.466254944  | 0.075043526 | 6.213126815  | 5.19E-10    | 7.51E-09    |
| ENSG00000111670 | 178.8464603 | -0.164244495 | 0.13928306  | -1.179213712 | 0.238313087 | 0.399840264 |
| ENSG00000111671 | 20.05024458 | -1.021934255 | 0.398387405 | -2.565177116 | 0.010312315 | 0.033163253 |
| ENSG00000111676 | 2968.115928 | -0.398101217 | 0.063357287 | -6.283432181 | 3.31E-10    | 4.91E-09    |
| ENSG00000111678 | 178.5210222 | 0.505180947  | 0.138214574 | 3.655048325  | 0.000257134 | 0.001338753 |
| ENSG00000111679 | 53.89798465 | -1.191597578 | 0.251900866 | -4.730422706 | 2.24E-06    | 1.85E-05    |
| ENSG00000111684 | 352.873834  | -0.094677523 | 0.110700757 | -0.855256324 | 0.392409261 | 0.560693001 |
| ENSG00000111696 | 165.2879063 | -0.276209277 | 0.147324188 | -1.874839979 | 0.060814741 | 0.142401179 |
| ENSG00000111707 | 344.9571689 | -0.061764598 | 0.103332491 | -0.597726782 | 0.550022252 | 0.698126192 |
| ENSG00000111711 | 97.29007454 | -0.074933936 | 0.180226007 | -0.415777597 | 0.677572754 | 0.795342565 |
| ENSG00000111716 | 237.1488144 | 0.296601945  | 0.127977722 | 2.317606066  | 0.02047074  | 0.058912618 |
| ENSG00000111725 | 116.6636186 | -0.225906625 | 0.176102299 | -1.282814738 | 0.199556989 | 0.351583724 |
| ENSG00000111726 | 106.1192179 | 0.115071599  | 0.17439306  | 0.659840471  | 0.509356209 | 0.665836024 |
| ENSG00000111727 | 47.59035773 | 0.358192242  | 0.253289804 | 1.414159735  | 0.157315007 | 0.29530989  |
| ENSG00000111731 | 321.0098255 | 0.040357121  | 0.105917656 | 0.381023547  | 0.703185776 | 0.814114448 |
| ENSG00000111737 | 314.0163693 | 0.045405261  | 0.110369868 | 0.411391819  | 0.680785252 | 0.797846691 |
| ENSG00000111752 | 96.24232773 | -0.323731234 | 0.180532778 | -1.793199203 | 0.072941078 | 0.163962765 |
| ENSG00000111775 | 157.4840087 | 0.373803945  | 0.163338941 | 2.288517008  | 0.022107431 | 0.062572074 |
| ENSG00000111785 | 155.464319  | -0.165508881 | 0.155364528 | -1.065293887 | 0.286742958 | 0.456572937 |
| ENSG00000111786 | 819.126676  | 0.086013703  | 0.078864419 | 1.090652837  | 0.275425671 | 0.443783482 |
| ENSG00000111788 | 38.04043691 | 0.033158754  | 0.287847147 | 0.115195702  | 0.908290005 | 0.950898041 |
| ENSG00000111790 | 129.5179026 | -0.191752606 | 0.173317073 | -1.106368822 | 0.268566915 | 0.435680731 |
| ENSG00000111799 | 14.90930452 | -1.231737169 | 0.471462376 | -2.612588475 | 0.008985943 | 0.02948506  |
| ENSG00000111801 | 31.47694208 | 0.867514748  | 0.325124382 | 2.668254966  | 0.007624637 | 0.02569053  |
| ENSG00000111802 | 133.5121128 | 0.119878913  | 0.157067819 | 0.763230262  | 0.445326084 | 0.61035179  |
| ENSG00000111817 | 490.2161664 | -0.780795803 | 0.094065793 | -8.30052859  | 1.04E-16    | 2.81E-15    |
| ENSG00000111832 | 321.9290861 | -0.065381898 | 0.106100293 | -0.616227304 | 0.53774451  | 0.688558843 |
| ENSG00000111834 | 16.21297724 | -0.960517776 | 0.450022787 | -2.134375866 | 0.032812026 | 0.086637316 |
| ENSG00000111843 | 178.8776084 | 0.08997674   | 0.141660857 | 0.635155982  | 0.525326689 | 0.678660352 |
| ENSG00000111845 | 195.7565002 | 0.206223911  | 0.143463719 | 1.437463862  | 0.150586234 | 0.285965233 |
| ENSG00000111846 | 340.6625151 | -0.57931001  | 0.109795138 | -5.276281089 | 1.32E-07    | 1.36E-06    |
| ENSG00000111850 | 71.61726913 | -0.685547279 | 0.21948487  | -3.123437529 | 0.001787518 | 0.007422189 |
| ENSG00000111860 | 178.9972177 | -0.498875336 | 0.140321857 | -3.555221875 | 0.00037766  | 0.001887898 |
| ENSG00000111875 | 59.77747087 | -0.124217442 | 0.229367583 | -0.541564943 | 0.588118248 | 0.72968478  |
| ENSG00000111877 | 238.1069624 | 0.188244567  | 0.123784469 | 1.520744635  | 0.128323933 | 0.253993248 |
| ENSG00000111879 | 129.7056318 | 0.211570086  | 0.157432151 | 1.343881058  | 0.178986852 | 0.324901173 |
| ENSG00000111880 | 202.7508551 | -0.296575004 | 0.130558372 | -2.271589331 | 0.023111326 | 0.064941947 |
| ENSG00000111897 | 338.080823  | -0.342472065 | 0.106121005 | -3.227184521 | 0.001250148 | 0.005457064 |
| ENSG00000111906 | 146.4139746 | 0.310641151  | 0.151127893 | 2.055485221  | 0.039832162 | 0.101509865 |
| ENSG00000111911 | 226.2825383 | 0.295109663  | 0.130237774 | 2.26592988   | 0.023455677 | 0.065738606 |
| ENSG00000111912 | 187.4801465 | 0.178163698  | 0.13524864  | 1.317304912  | 0.18773644  | 0.336283316 |
| ENSG00000111961 | 246.3295153 | 0.337690974  | 0.123088785 | 2.743474764  | 0.006079272 | 0.02107491  |
| ENSG00000111962 | 82.6635787  | 0.288456751  | 0.196342154 | 1.469153438  | 0.141791176 | 0.273402972 |

|                 |             |              |             |              |             |             |
|-----------------|-------------|--------------|-------------|--------------|-------------|-------------|
| ENSG00000112029 | 258.2318521 | -0.155676223 | 0.128629714 | -1.210266417 | 0.22617668  | 0.384569454 |
| ENSG00000112031 | 56.72980122 | -0.677847343 | 0.241913006 | -2.802029344 | 0.005078225 | 0.018137257 |
| ENSG00000112033 | 812.0196955 | 0.335812617  | 0.083786515 | 4.007955411  | 6.12E-05    | 0.000369241 |
| ENSG00000112039 | 100.118895  | -0.115678934 | 0.186167876 | -0.621368928 | 0.534356911 | 0.685427041 |
| ENSG00000112062 | 198.514768  | 0.187691233  | 0.130578871 | 1.437378283  | 0.150610536 | 0.285972722 |
| ENSG00000112078 | 676.9966431 | 0.038149624  | 0.085180675 | 0.447867129  | 0.654249093 | 0.778174175 |
| ENSG00000112079 | 240.7785322 | -0.412937807 | 0.129552774 | -3.187409999 | 0.001435531 | 0.006153466 |
| ENSG00000112081 | 1313.74638  | -0.059661283 | 0.074236077 | -0.803669656 | 0.421587783 | 0.589199442 |
| ENSG00000112110 | 294.6932829 | 0.245713188  | 0.114174608 | 2.152082598  | 0.031390849 | 0.083512739 |
| ENSG00000112118 | 1597.557756 | -0.214076258 | 0.06675729  | -3.206784743 | 0.001342274 | 0.005801514 |
| ENSG00000112130 | 210.8015648 | 0.244297957  | 0.127692071 | 1.913180318  | 0.055724972 | 0.132852798 |
| ENSG00000112139 | 27.83164189 | -0.844183492 | 0.341404626 | -2.472677368 | 0.013410515 | 0.041403627 |
| ENSG00000112144 | 157.7539372 | -0.304651337 | 0.147420062 | -2.066552773 | 0.038776315 | 0.099378014 |
| ENSG00000112146 | 259.0210457 | 0.093503486  | 0.122792121 | 0.761477899  | 0.446371674 | 0.611307684 |
| ENSG00000112149 | 22.65975022 | 0.608629683  | 0.395927911 | 1.537223484  | 0.124238591 | 0.248318084 |
| ENSG00000112159 | 2101.49072  | -0.548914512 | 0.062933157 | -8.722183009 | 2.73E-18    | 8.37E-17    |
| ENSG00000112167 | 114.1122953 | 0.004813268  | 0.167053561 | 0.028812723  | 0.977013953 | 0.988555428 |
| ENSG00000112175 | 289.6437583 | -1.244684256 | 0.118780933 | -10.478822   | 1.08E-25    | 4.99E-24    |
| ENSG00000112183 | 21.17284902 | -0.557816706 | 0.400229148 | -1.39374333  | 0.163395127 | 0.30380031  |
| ENSG00000112186 | 177.4886235 | 0.089863598  | 0.137960041 | 0.651374102  | 0.514805024 | 0.670635832 |
| ENSG00000112200 | 509.5226855 | -0.058215691 | 0.091252715 | -0.637961197 | 0.523498939 | 0.677001436 |
| ENSG00000112208 | 385.44393   | 0.490944407  | 0.100787361 | 4.871090975  | 1.11E-06    | 9.71E-06    |
| ENSG00000112210 | 75.41979662 | -0.114495055 | 0.20630599  | -0.55497688  | 0.578910475 | 0.722326829 |
| ENSG00000112218 | 97.27402906 | -0.28227783  | 0.188811728 | -1.495022753 | 0.134908504 | 0.263752228 |
| ENSG00000112234 | 165.9391838 | -0.122479722 | 0.155609773 | -0.787095307 | 0.431226076 | 0.597556742 |
| ENSG00000112237 | 143.0179267 | -0.352378173 | 0.154783804 | -2.27658298  | 0.02281114  | 0.064201179 |
| ENSG00000112242 | 291.0502857 | 0.142501542  | 0.113812609 | 1.252071652  | 0.210543756 | 0.365654348 |
| ENSG00000112249 | 947.9455709 | 0.491183775  | 0.078689989 | 6.242010992  | 4.32E-10    | 6.31E-09    |
| ENSG00000112276 | 126.9921356 | -3.828780532 | 0.256255989 | -14.94123337 | 1.78E-50    | 1.90E-48    |
| ENSG00000112282 | 202.4149605 | 0.005752116  | 0.138623419 | 0.041494548  | 0.966901639 | 0.982787985 |
| ENSG00000112290 | 266.1073432 | -0.056613675 | 0.126975476 | -0.445863065 | 0.655696163 | 0.779180728 |
| ENSG00000112293 | 110.0167872 | 0.345365238  | 0.171427808 | 2.014639531  | 0.043942432 | 0.110323386 |
| ENSG00000112294 | 220.5808182 | 0.159888511  | 0.126246318 | 1.266480589  | 0.205341075 | 0.358759462 |
| ENSG00000112304 | 395.8294533 | 0.079404374  | 0.100345658 | 0.791308518  | 0.428763979 | 0.595731712 |
| ENSG00000112305 | 178.3569769 | 0.376878467  | 0.135428571 | 2.782857886  | 0.00538824  | 0.019045951 |
| ENSG00000112306 | 3136.634122 | 0.022338436  | 0.06184231  | 0.361216068  | 0.717937931 | 0.824196969 |
| ENSG00000112308 | 203.7694204 | 0.218200513  | 0.129873947 | 1.680094569  | 0.092938917 | 0.198255577 |
| ENSG00000112312 | 182.5659516 | -0.259326255 | 0.139386527 | -1.860482929 | 0.062817232 | 0.145970827 |
| ENSG00000112319 | 309.8332361 | -1.580331625 | 0.115657908 | -13.66384416 | 1.67E-42    | 1.41E-40    |
| ENSG00000112320 | 327.7583052 | 0.150678084  | 0.112729803 | 1.336630429  | 0.181343301 | 0.327968244 |
| ENSG00000112335 | 479.4613666 | 0.100331179  | 0.093388948 | 1.074336748  | 0.282671781 | 0.452173323 |
| ENSG00000112339 | 321.8883944 | -0.070455916 | 0.109561213 | -0.643073528 | 0.520176391 | 0.674660147 |
| ENSG00000112343 | 33.24079736 | 1.255644285  | 0.310826133 | 4.039699857  | 5.35E-05    | 0.000326298 |
| ENSG00000112357 | 35.83286372 | 0.520166407  | 0.29381797  | 1.770369616  | 0.076665588 | 0.170587916 |
| ENSG00000112365 | 363.7782929 | 0.027511969  | 0.108950911 | 0.252517106  | 0.800641394 | 0.880981486 |
| ENSG00000112367 | 83.94625623 | -0.066672678 | 0.193465591 | -0.344622928 | 0.730377867 | 0.83331836  |
| ENSG00000112378 | 56.12933588 | 0.177102975  | 0.23612694  | 0.750032904  | 0.453234888 | 0.617396281 |
| ENSG00000112379 | 47.36494064 | 1.309036784  | 0.266818778 | 4.90608942   | 9.29E-07    | 8.28E-06    |
| ENSG00000112394 | 87.96774692 | 0.010088304  | 0.187236959 | 0.053879875  | 0.957030871 | 0.976921201 |
| ENSG00000112406 | 104.0264943 | -0.50971485  | 0.179167953 | -2.844899672 | 0.004442541 | 0.016200514 |

|                 |             |              |             |              |             |             |
|-----------------|-------------|--------------|-------------|--------------|-------------|-------------|
| ENSG00000112414 | 179.5196438 | -1.22700828  | 0.144842709 | -8.471315449 | 2.43E-17    | 6.84E-16    |
| ENSG00000112419 | 393.1093791 | -0.420568079 | 0.100843279 | -4.170511748 | 3.04E-05    | 0.000196191 |
| ENSG00000112425 | 49.74005084 | -0.813025806 | 0.253700907 | -3.204662594 | 0.001352209 | 0.005840861 |
| ENSG00000112473 | 726.7431134 | 0.024052925  | 0.082405693 | 0.291884267  | 0.770375113 | 0.862680103 |
| ENSG00000112511 | 151.6407118 | 0.087460441  | 0.146463328 | 0.59714908   | 0.550407852 | 0.698263542 |
| ENSG00000112514 | 400.710101  | 0.040159683  | 0.100451336 | 0.39979242   | 0.689309414 | 0.804480669 |
| ENSG00000112531 | 967.5800983 | -0.012655789 | 0.077830885 | -0.162606261 | 0.870828457 | 0.928112848 |
| ENSG00000112541 | 269.9178323 | 0.047272991  | 0.124061197 | 0.381045741  | 0.703169308 | 0.814114448 |
| ENSG00000112559 | 23.64431915 | -0.587191619 | 0.365517795 | -1.606465205 | 0.108171734 | 0.223027792 |
| ENSG00000112561 | 38.82960918 | -0.616288268 | 0.286646107 | -2.149996998 | 0.031555452 | 0.083855361 |
| ENSG00000112576 | 321.3386423 | 0.222150896  | 0.113649962 | 1.954693971  | 0.050619202 | 0.123039961 |
| ENSG00000112578 | 205.77495   | 0.115802655  | 0.135043736 | 0.857519637  | 0.391157767 | 0.559473898 |
| ENSG00000112584 | 283.4485048 | -0.282829634 | 0.113544525 | -2.490913884 | 0.0127415   | 0.03968511  |
| ENSG00000112592 | 178.311393  | 0.005825196  | 0.138714414 | 0.041994167  | 0.966503348 | 0.98273197  |
| ENSG00000112624 | 239.0284199 | 0.205222483  | 0.125213523 | 1.638980181  | 0.101217387 | 0.21170349  |
| ENSG00000112640 | 412.6664258 | -0.049733131 | 0.097170906 | -0.511810919 | 0.608783348 | 0.745198811 |
| ENSG00000112651 | 26.53381619 | -0.276425757 | 0.344837862 | -0.801610809 | 0.422778123 | 0.590041162 |
| ENSG00000112655 | 918.4519025 | 0.048819589  | 0.077688792 | 0.628399387  | 0.529742339 | 0.682186526 |
| ENSG00000112658 | 699.2991548 | 0.001481669  | 0.083059893 | 0.017838559  | 0.985767644 | 0.992622086 |
| ENSG00000112659 | 9.426301703 | -0.569985304 | 0.563200563 | -1.012046759 | 0.311515697 | 0.482986865 |
| ENSG00000112667 | 642.4029331 | 0.276289926  | 0.092020102 | 3.002495334  | 0.002677761 | 0.010480498 |
| ENSG00000112679 | 186.6207768 | 0.064395812  | 0.133859081 | 0.481071671  | 0.630465561 | 0.760706901 |
| ENSG00000112685 | 260.5826007 | -0.107675376 | 0.120891349 | -0.890678919 | 0.373101447 | 0.54340148  |
| ENSG00000112695 | 1025.7854   | 0.117778253  | 0.077823046 | 1.513410986  | 0.130175296 | 0.256930221 |
| ENSG00000112697 | 286.2013492 | -0.217306128 | 0.115996548 | -1.873384429 | 0.061015319 | 0.142775642 |
| ENSG00000112699 | 139.5268064 | 0.071224574  | 0.151742183 | 0.469378865  | 0.638798853 | 0.766678698 |
| ENSG00000112701 | 834.4820569 | -0.066869031 | 0.077190273 | -0.866288298 | 0.386332082 | 0.555102336 |
| ENSG00000112715 | 834.3089617 | 0.265026003  | 0.080783591 | 3.280691043  | 0.001035531 | 0.00463547  |
| ENSG00000112739 | 1531.362062 | 0.075609765  | 0.070098255 | 1.078625499  | 0.280754709 | 0.449518669 |
| ENSG00000112742 | 245.1961976 | -0.387690437 | 0.122286789 | -3.170337865 | 0.001522618 | 0.006469514 |
| ENSG00000112759 | 540.0933313 | -0.246025817 | 0.095448644 | -2.577572673 | 0.009949696 | 0.032159083 |
| ENSG00000112763 | 191.3756803 | 0.151242977  | 0.136724833 | 1.106185125  | 0.2686464   | 0.435759351 |
| ENSG00000112773 | 1994.727078 | 1.734487981  | 0.064379703 | 26.94153436  | 7.17E-160   | 3.87E-157   |
| ENSG00000112787 | 1180.522942 | 0.616344053  | 0.090710166 | 6.79465245   | 1.09E-11    | 1.91E-10    |
| ENSG00000112812 | 12.52515806 | -2.131640398 | 0.567550836 | -3.755858088 | 0.000172749 | 0.000937826 |
| ENSG00000112851 | 826.2086786 | -0.224771501 | 0.077419528 | -2.903292062 | 0.003692621 | 0.01379161  |
| ENSG00000112852 | 68.04431226 | -0.382910519 | 0.214852199 | -1.782204329 | 0.074715917 | 0.16693725  |
| ENSG00000112855 | 83.35559605 | 0.013415469  | 0.192215048 | 0.069794063  | 0.944357572 | 0.969125571 |
| ENSG00000112874 | 52.85032761 | -0.191049713 | 0.242083752 | -0.789188499 | 0.430001843 | 0.596802281 |
| ENSG00000112877 | 168.4852738 | -0.383806305 | 0.142199417 | -2.699070884 | 0.006953336 | 0.02365549  |
| ENSG00000112893 | 239.4102349 | -0.904107705 | 0.125154121 | -7.223954731 | 5.05E-13    | 1.03E-11    |
| ENSG00000112941 | 477.8599329 | 0.086824994  | 0.091450489 | 0.949420776  | 0.342406648 | 0.514366687 |
| ENSG00000112964 | 11.50602412 | 0.255640658  | 0.504495683 | 0.506725165  | 0.612347671 | 0.747774297 |
| ENSG00000112972 | 981.6883191 | 0.143762148  | 0.090846451 | 1.582474015  | 0.1135414   | 0.231516337 |
| ENSG00000112977 | 244.6507381 | -0.314702179 | 0.121214562 | -2.596240703 | 0.009425001 | 0.030710507 |
| ENSG00000112983 | 418.0639972 | -0.018120406 | 0.098189917 | -0.184544465 | 0.853586348 | 0.916061383 |
| ENSG00000112984 | 601.139238  | 0.254021406  | 0.0894698   | 2.839186014  | 0.004522878 | 0.016438    |
| ENSG00000112992 | 386.8433462 | -0.473405278 | 0.104178896 | -4.544157182 | 5.52E-06    | 4.19E-05    |
| ENSG00000112996 | 722.8296394 | -0.812683618 | 0.08170473  | -9.946592098 | 2.61E-23    | 1.05E-21    |
| ENSG00000113013 | 4139.887813 | 0.174972951  | 0.060965283 | 2.870042464  | 0.004104167 | 0.015143481 |

|                 |             |              |             |              |             |             |
|-----------------|-------------|--------------|-------------|--------------|-------------|-------------|
| ENSG00000113048 | 884.0032005 | 0.134636733  | 0.078613643 | 1.71263827   | 0.086779108 | 0.187999095 |
| ENSG00000113068 | 205.2237788 | -0.10896574  | 0.129947121 | -0.83853909  | 0.401728003 | 0.570064983 |
| ENSG00000113070 | 11.99184878 | 0.697836144  | 0.520830892 | 1.339851676  | 0.180293572 | 0.326532207 |
| ENSG00000113083 | 20.8289775  | -0.315494619 | 0.392076066 | -0.804677066 | 0.421006057 | 0.588503542 |
| ENSG00000113108 | 27.93386721 | 0.408564728  | 0.332073529 | 1.230344161  | 0.218568254 | 0.375609036 |
| ENSG00000113119 | 96.71945834 | 0.048237203  | 0.189508706 | 0.254538192  | 0.799079802 | 0.880504705 |
| ENSG00000113140 | 503.3691113 | -1.38213834  | 0.100163678 | -13.79879775 | 2.59E-43    | 2.23E-41    |
| ENSG00000113141 | 419.741784  | 0.115559083  | 0.100729193 | 1.147225339  | 0.251288502 | 0.415585498 |
| ENSG00000113161 | 1261.517184 | -0.101211401 | 0.07565096  | -1.33787331  | 0.180937739 | 0.327507088 |
| ENSG00000113163 | 191.7623113 | -0.568730287 | 0.138668926 | -4.101353516 | 4.11E-05    | 0.00025746  |
| ENSG00000113194 | 840.1189379 | -0.111686676 | 0.075649996 | -1.476360639 | 0.139847103 | 0.270694814 |
| ENSG00000113240 | 80.39233141 | -0.023821812 | 0.199934831 | -0.119147881 | 0.905158197 | 0.949216662 |
| ENSG00000113269 | 187.4458123 | 0.316770063  | 0.140246541 | 2.258665778  | 0.023904183 | 0.066755876 |
| ENSG00000113272 | 168.7525345 | 0.143429454  | 0.142130438 | 1.009139606  | 0.312907686 | 0.484076461 |
| ENSG00000113273 | 305.0383235 | 0.136666213  | 0.113188618 | 1.207420101  | 0.227270398 | 0.385773426 |
| ENSG00000113282 | 559.1614931 | 0.03233751   | 0.089806687 | 0.360079085  | 0.718787993 | 0.824903181 |
| ENSG00000113300 | 505.8820836 | -0.06911989  | 0.092524791 | -0.747041843 | 0.455038303 | 0.618832709 |
| ENSG00000113312 | 240.2288397 | 0.325066035  | 0.123250682 | 2.637438018  | 0.008353489 | 0.027779702 |
| ENSG00000113318 | 199.6127845 | -0.403935464 | 0.144819581 | -2.789232381 | 0.005283314 | 0.018752768 |
| ENSG00000113328 | 322.1587313 | -1.047197655 | 0.112518259 | -9.306913092 | 1.32E-20    | 4.60E-19    |
| ENSG00000113356 | 171.199751  | -0.231964976 | 0.141710358 | -1.636895    | 0.101652411 | 0.212455202 |
| ENSG00000113360 | 1226.770049 | 0.115517303  | 0.073637309 | 1.568733358  | 0.116710082 | 0.236330766 |
| ENSG00000113361 | 16.72290379 | 1.361508125  | 0.435461933 | 3.126583569  | 0.001768502 | 0.007358457 |
| ENSG00000113368 | 1115.505927 | -0.408846057 | 0.077179342 | -5.297350928 | 1.17E-07    | 1.22E-06    |
| ENSG00000113369 | 159.6554415 | 0.192980776  | 0.148292452 | 1.301352652  | 0.193137773 | 0.343853776 |
| ENSG00000113384 | 413.8612722 | 0.130778358  | 0.095651468 | 1.367238385  | 0.171550598 | 0.314673706 |
| ENSG00000113387 | 921.1347905 | -0.06109701  | 0.077338564 | -0.789994103 | 0.429531212 | 0.596325849 |
| ENSG00000113391 | 185.5133105 | -0.031191458 | 0.139531288 | -0.223544546 | 0.823111718 | 0.896367959 |
| ENSG00000113407 | 1283.118122 | -1.075106506 | 0.0788032   | -13.64292948 | 2.22E-42    | 1.87E-40    |
| ENSG00000113441 | 488.512272  | -0.158079544 | 0.09418362  | -1.678418646 | 0.0932654   | 0.198740758 |
| ENSG00000113448 | 1806.199087 | -0.964408724 | 0.068274725 | -14.12541357 | 2.65E-45    | 2.42E-43    |
| ENSG00000113456 | 131.0571201 | -0.254677883 | 0.165196197 | -1.541669165 | 0.123154009 | 0.24688802  |
| ENSG00000113460 | 426.9981558 | 0.223714142  | 0.104537194 | 2.140043493  | 0.032351252 | 0.085597671 |
| ENSG00000113504 | 237.6044699 | 0.53656652   | 0.121159768 | 4.428586554  | 9.49E-06    | 6.83E-05    |
| ENSG00000113522 | 114.9625584 | 0.062438534  | 0.165431693 | 0.377427882  | 0.70585565  | 0.81545804  |
| ENSG00000113552 | 224.4476092 | 0.402758754  | 0.126606234 | 3.18119212   | 0.001466703 | 0.006273685 |
| ENSG00000113558 | 522.773887  | 0.339454578  | 0.095609032 | 3.55044467   | 0.000384581 | 0.001918398 |
| ENSG00000113569 | 1235.699996 | -0.193647493 | 0.070403811 | -2.750525706 | 0.005949972 | 0.02070331  |
| ENSG00000113575 | 222.9672565 | 0.059824437  | 0.143391199 | 0.417211358  | 0.676523818 | 0.794509662 |
| ENSG00000113583 | 340.9759709 | -0.389014054 | 0.110093547 | -3.533486416 | 0.000410117 | 0.002026351 |
| ENSG00000113593 | 248.2494679 | -0.111780665 | 0.118883249 | -0.9402558   | 0.347086366 | 0.518998461 |
| ENSG00000113595 | 60.00828388 | -0.117045938 | 0.238546463 | -0.490663064 | 0.623664774 | 0.755746988 |
| ENSG00000113597 | 89.23578146 | -0.283208082 | 0.188375937 | -1.503419632 | 0.132730867 | 0.260911068 |
| ENSG00000113615 | 418.9791397 | 0.150503494  | 0.101723415 | 1.479536392  | 0.138997013 | 0.269606605 |
| ENSG00000113621 | 182.5974208 | 0.093846032  | 0.138294731 | 0.678594414  | 0.497394883 | 0.655493567 |
| ENSG00000113638 | 86.5611585  | -0.208215959 | 0.188905805 | -1.102221073 | 0.270365573 | 0.437789648 |
| ENSG00000113643 | 692.273438  | 0.324205686  | 0.080691011 | 4.017866182  | 5.87E-05    | 0.000354968 |
| ENSG00000113645 | 293.2471018 | 0.330561417  | 0.111083977 | 2.975779455  | 0.002922449 | 0.011287228 |
| ENSG00000113648 | 1430.621774 | -0.10625421  | 0.077990542 | -1.362398651 | 0.173072109 | 0.316761423 |
| ENSG00000113649 | 1591.340624 | 0.08685059   | 0.065424542 | 1.327492514  | 0.184345815 | 0.331817742 |

|                 |             |              |             |              |             |             |
|-----------------|-------------|--------------|-------------|--------------|-------------|-------------|
| ENSG00000113658 | 509.9662221 | -0.033946385 | 0.089868326 | -0.3777347   | 0.705627687 | 0.815261731 |
| ENSG00000113712 | 895.6150235 | -0.119040242 | 0.074365241 | -1.600751097 | 0.109432059 | 0.225130658 |
| ENSG00000113716 | 445.0380414 | 0.188928925  | 0.095089993 | 1.986843395  | 0.046939754 | 0.116091213 |
| ENSG00000113719 | 648.4571825 | -0.084803269 | 0.084419484 | -1.004546164 | 0.315115432 | 0.486580902 |
| ENSG00000113721 | 46.95845638 | 0.2161256    | 0.258437008 | 0.836279609  | 0.402997622 | 0.571289494 |
| ENSG00000113732 | 186.5289645 | 0.289175178  | 0.159901816 | 1.808454614  | 0.070535775 | 0.15996384  |
| ENSG00000113734 | 74.23642905 | 0.343027356  | 0.20372948  | 1.683739415  | 0.09223204  | 0.197035205 |
| ENSG00000113739 | 527.7735874 | -0.22562109  | 0.103150338 | -2.187303435 | 0.02872038  | 0.077763142 |
| ENSG00000113742 | 122.7614461 | 0.256253934  | 0.164397152 | 1.558749228  | 0.119055745 | 0.240318445 |
| ENSG00000113758 | 1428.435975 | 0.089855528  | 0.076527509 | 1.174159842  | 0.240331008 | 0.4027114   |
| ENSG00000113761 | 139.0380896 | -0.048855396 | 0.151601011 | -0.322262999 | 0.747253461 | 0.846027998 |
| ENSG00000113810 | 2551.961984 | 0.191720548  | 0.058212876 | 3.293438891  | 0.000989699 | 0.004451583 |
| ENSG00000113811 | 153.6688253 | 0.230195007  | 0.145400394 | 1.583180082  | 0.113380425 | 0.231322415 |
| ENSG00000113812 | 272.1008683 | -0.122661968 | 0.117150321 | -1.047047642 | 0.295077606 | 0.465516074 |
| ENSG00000113838 | 34.65297119 | 0.194438342  | 0.295344442 | 0.65834434   | 0.510316892 | 0.666767871 |
| ENSG00000113845 | 339.3502219 | 0.099784332  | 0.110869904 | 0.900012793  | 0.368113443 | 0.539420982 |
| ENSG00000113851 | 46.3393871  | -0.196925155 | 0.26283828  | -0.749225549 | 0.453721273 | 0.617606294 |
| ENSG00000113916 | 119.6604492 | 0.235650096  | 0.175377463 | 1.343673769  | 0.179053903 | 0.324908693 |
| ENSG00000113966 | 38.95570352 | -0.286255487 | 0.278716637 | -1.02704844  | 0.304397655 | 0.475361185 |
| ENSG00000113971 | 39.24258673 | 0.592970876  | 0.281483952 | 2.106588574  | 0.035153258 | 0.091753856 |
| ENSG00000114019 | 185.5183969 | -0.713745547 | 0.138948883 | -5.136749085 | 2.80E-07    | 2.74E-06    |
| ENSG00000114021 | 245.0144139 | -0.047259096 | 0.13016089  | -0.363082154 | 0.716543515 | 0.823538435 |
| ENSG00000114023 | 482.0387125 | 0.903481363  | 0.095885024 | 9.422549231  | 4.40E-21    | 1.59E-19    |
| ENSG00000114026 | 379.4264918 | 0.332580595  | 0.103715818 | 3.206652576  | 0.001342891 | 0.005802395 |
| ENSG00000114030 | 488.1317453 | -0.093634016 | 0.090142163 | -1.038737175 | 0.298926987 | 0.469374847 |
| ENSG00000114054 | 707.4284269 | 0.175488919  | 0.082519617 | 2.126632751  | 0.033450609 | 0.088091621 |
| ENSG00000114062 | 1091.991573 | -0.034376046 | 0.072066664 | -0.477003436 | 0.633359675 | 0.7628883   |
| ENSG00000114098 | 163.5262026 | -0.153482557 | 0.148615146 | -1.032751783 | 0.301720073 | 0.47217935  |
| ENSG00000114107 | 157.3742965 | -0.375845613 | 0.146477209 | -2.56589824  | 0.010290901 | 0.033101967 |
| ENSG00000114115 | 16.22440791 | -3.186903706 | 0.595561599 | -5.351089986 | 8.74E-08    | 9.30E-07    |
| ENSG00000114120 | 590.3819463 | -0.00163431  | 0.090400767 | -0.018078496 | 0.985576233 | 0.992571648 |
| ENSG00000114125 | 275.0248907 | 0.065219499  | 0.133439515 | 0.488757016  | 0.625013733 | 0.75653321  |
| ENSG00000114126 | 509.0686045 | 0.115020775  | 0.09337248  | 1.231848768  | 0.218005582 | 0.375025739 |
| ENSG00000114127 | 397.7880391 | -0.000830572 | 0.099952256 | -0.008309687 | 0.993369905 | 0.99670479  |
| ENSG00000114166 | 94.05457699 | 1.03883923   | 0.187595219 | 5.537663685  | 3.07E-08    | 3.51E-07    |
| ENSG00000114200 | 13.58193568 | -6.050042674 | 1.238845524 | -4.883613458 | 1.04E-06    | 9.19E-06    |
| ENSG00000114209 | 218.5628854 | -0.082254437 | 0.129133388 | -0.636972656 | 0.524142655 | 0.677522028 |
| ENSG00000114251 | 131.1842083 | -10.31533138 | 1.185807459 | -8.698993501 | 3.35E-18    | 1.02E-16    |
| ENSG00000114268 | 350.4245711 | 0.896152622  | 0.113683882 | 7.882846744  | 3.20E-15    | 7.84E-14    |
| ENSG00000114270 | 105.2524981 | -0.176337662 | 0.181327734 | -0.972480368 | 0.330811627 | 0.503184724 |
| ENSG00000114302 | 1232.339367 | 0.113780317  | 0.074267428 | 1.53203525   | 0.125513737 | 0.250190359 |
| ENSG00000114315 | 1702.727038 | -0.990777838 | 0.065015007 | -15.23921747 | 1.94E-52    | 2.24E-50    |
| ENSG00000114316 | 372.0995515 | 0.124276314  | 0.107026135 | 1.161177264  | 0.245569819 | 0.40905007  |
| ENSG00000114331 | 485.4375956 | 0.029779219  | 0.099435433 | 0.299482967  | 0.764571566 | 0.858233722 |
| ENSG00000114346 | 571.1501285 | -0.281176606 | 0.091788516 | -3.063309205 | 0.002189037 | 0.008818213 |
| ENSG00000114353 | 1458.021056 | 0.137439037  | 0.06595784  | 2.083740703  | 0.03718376  | 0.096014756 |
| ENSG00000114354 | 1310.345439 | 0.085988364  | 0.079745756 | 1.078281385  | 0.280908202 | 0.449677209 |
| ENSG00000114378 | 37.48328041 | -1.950214902 | 0.329633649 | -5.916310141 | 3.29E-09    | 4.29E-08    |
| ENSG00000114383 | 104.0356823 | 0.085744278  | 0.17509724  | 0.4896952    | 0.624349599 | 0.756055071 |
| ENSG00000114388 | 141.9914434 | 0.299543524  | 0.15429657  | 1.941349213  | 0.052215934 | 0.126200486 |

|                 |             |              |             |              |             |             |
|-----------------|-------------|--------------|-------------|--------------|-------------|-------------|
| ENSG00000114391 | 1610.173249 | 0.455744279  | 0.067699096 | 6.731910876  | 1.67E-11    | 2.89E-10    |
| ENSG00000114395 | 42.06886403 | 0.515493574  | 0.287728332 | 1.791598243  | 0.073197345 | 0.164380992 |
| ENSG00000114416 | 622.7334861 | -0.102204723 | 0.084526868 | -1.209138887 | 0.226609492 | 0.385000427 |
| ENSG00000114423 | 250.4091499 | -2.107812531 | 0.13631515  | -15.46278995 | 6.19E-54    | 7.18E-52    |
| ENSG00000114439 | 1075.377801 | 0.469827175  | 0.074916449 | 6.271348727  | 3.58E-10    | 5.29E-09    |
| ENSG00000114446 | 145.2296372 | -0.300963291 | 0.154355612 | -1.949804661 | 0.051199406 | 0.124065662 |
| ENSG00000114450 | 860.4311632 | -0.053956703 | 0.08181775  | -0.659474298 | 0.509591246 | 0.665943644 |
| ENSG00000114473 | 39.86706537 | -0.038380243 | 0.277160569 | -0.138476563 | 0.889863791 | 0.939631412 |
| ENSG00000114480 | 196.1138782 | 0.093911723  | 0.130311186 | 0.720672765  | 0.471110873 | 0.633103807 |
| ENSG00000114491 | 220.0908418 | -0.136006294 | 0.137656459 | -0.988012437 | 0.323146557 | 0.494901842 |
| ENSG00000114503 | 772.1171444 | 0.253734771  | 0.079354442 | 3.197486664  | 0.001386308 | 0.005973458 |
| ENSG00000114520 | 157.5012213 | 0.034793807  | 0.148037574 | 0.235033623  | 0.814182637 | 0.890857104 |
| ENSG00000114529 | 14.35135827 | -0.769977283 | 0.47891198  | -1.607763672 | 0.107886948 | 0.222603989 |
| ENSG00000114544 | 108.4374339 | 0.706692148  | 0.178007745 | 3.970007858  | 7.19E-05    | 0.000426876 |
| ENSG00000114554 | 625.2602026 | 0.084008787  | 0.084974595 | 0.988634151  | 0.322842171 | 0.494547    |
| ENSG00000114573 | 482.6532918 | -0.263291505 | 0.091925854 | -2.864172524 | 0.004181002 | 0.015394636 |
| ENSG00000114626 | 19.66644016 | 0.628540017  | 0.390154421 | 1.611003191  | 0.107179027 | 0.22150122  |
| ENSG00000114631 | 139.8438376 | 0.939190201  | 0.162727102 | 5.771565965  | 7.85E-09    | 9.80E-08    |
| ENSG00000114646 | 59.97488416 | 0.826849468  | 0.240321385 | 3.440598789  | 0.000580429 | 0.002766637 |
| ENSG00000114648 | 326.2626828 | 0.188482045  | 0.106708098 | 1.766333102  | 0.077339981 | 0.17181634  |
| ENSG00000114650 | 757.9260376 | 0.235244499  | 0.092418535 | 2.54542554   | 0.010914464 | 0.03474178  |
| ENSG00000114654 | 11.1915581  | 0.412381754  | 0.555507016 | 0.742352017  | 0.457874083 | 0.621666078 |
| ENSG00000114656 | 11.63505118 | -0.747139891 | 0.51675243  | -1.445837209 | 0.148222867 | 0.28246607  |
| ENSG00000114670 | 16.39190468 | -1.183734707 | 0.462034819 | -2.562003245 | 0.010407035 | 0.033384984 |
| ENSG00000114686 | 551.5004587 | 0.220837688  | 0.08802133  | 2.508911053  | 0.012110397 | 0.037946632 |
| ENSG00000114735 | 197.6814499 | 0.441508209  | 0.139101357 | 3.174003617  | 0.001503518 | 0.006401916 |
| ENSG00000114737 | 29.90422937 | -0.808170512 | 0.329584878 | -2.452086141 | 0.014203066 | 0.043419034 |
| ENSG00000114738 | 738.8638089 | 0.151867913  | 0.079386438 | 1.913020877  | 0.05574538  | 0.132856354 |
| ENSG00000114739 | 410.6800622 | -0.635022864 | 0.101512346 | -6.255621995 | 3.96E-10    | 5.82E-09    |
| ENSG00000114742 | 295.1261057 | -0.262580701 | 0.109905403 | -2.38915189  | 0.016887319 | 0.050268313 |
| ENSG00000114744 | 81.7093847  | -0.725444402 | 0.219745429 | -3.301294623 | 0.000962398 | 0.004339904 |
| ENSG00000114745 | 187.9656175 | 0.114153943  | 0.135143256 | 0.844688417  | 0.398284828 | 0.566485979 |
| ENSG00000114767 | 219.5073977 | 0.236030676  | 0.134372544 | 1.75653946   | 0.07899634  | 0.174719466 |
| ENSG00000114770 | 152.1938148 | -0.032827612 | 0.162408189 | -0.202130278 | 0.839814878 | 0.906824475 |
| ENSG00000114779 | 709.5715526 | 0.369685752  | 0.086857216 | 4.256246868  | 2.08E-05    | 0.000139256 |
| ENSG00000114784 | 318.1014161 | -0.136307066 | 0.108049064 | -1.261529354 | 0.207118191 | 0.361055998 |
| ENSG00000114790 | 88.74477855 | 0.537638831  | 0.192174334 | 2.797662001  | 0.005147395 | 0.018342327 |
| ENSG00000114796 | 111.1474199 | 0.044094344  | 0.167693136 | 0.262946624  | 0.792591719 | 0.876311364 |
| ENSG00000114805 | 68.23374844 | -1.810330612 | 0.239246403 | -7.566803892 | 3.83E-14    | 8.74E-13    |
| ENSG00000114841 | 203.4214339 | 0.065094908  | 0.14653664  | 0.444222742  | 0.656881552 | 0.779984375 |
| ENSG00000114850 | 497.5188121 | 0.076429137  | 0.090176665 | 0.847548946  | 0.396689217 | 0.564511542 |
| ENSG00000114853 | 267.3212331 | 0.480273538  | 0.139395797 | 3.445394693  | 0.000570226 | 0.002721701 |
| ENSG00000114854 | 191.2124219 | 0.76421681   | 0.139328256 | 5.48500951   | 4.13E-08    | 4.64E-07    |
| ENSG00000114857 | 1723.650446 | 0.023551273  | 0.071589481 | 0.328976722  | 0.742173283 | 0.842381069 |
| ENSG00000114859 | 97.95055945 | 0.152812124  | 0.184036932 | 0.830334009  | 0.406349965 | 0.574534268 |
| ENSG00000114867 | 4364.957189 | 0.148460923  | 0.063893406 | 2.323571922  | 0.020148449 | 0.0581388   |
| ENSG00000114902 | 717.590679  | 0.55625196   | 0.081072819 | 6.861139965  | 6.83E-12    | 1.22E-10    |
| ENSG00000114904 | 380.5410744 | -0.29226668  | 0.106345879 | -2.748265222 | 0.005991152 | 0.020810514 |
| ENSG00000114923 | 30.29228542 | 0.079417292  | 0.32021626  | 0.248011429  | 0.804125564 | 0.88388651  |
| ENSG00000114933 | 674.4221413 | -0.209429709 | 0.087934234 | -2.381662967 | 0.017234663 | 0.051172123 |



|                 |             |              |             |              |             |             |
|-----------------|-------------|--------------|-------------|--------------|-------------|-------------|
| ENSG00000114942 | 1798.471007 | 0.1503224    | 0.086869073 | 1.730447839  | 0.083550293 | 0.182780091 |
| ENSG00000114956 | 211.0299019 | 0.118445827  | 0.132767612 | 0.892128923  | 0.372323834 | 0.54287242  |
| ENSG00000114978 | 1097.990552 | -0.188961091 | 0.084027141 | -2.248810191 | 0.024524575 | 0.068203663 |
| ENSG00000114982 | 443.227295  | -0.25555058  | 0.096045998 | -2.660710338 | 0.007797601 | 0.026160233 |
| ENSG00000114988 | 71.87456958 | -0.477157432 | 0.210322915 | -2.268689705 | 0.023287202 | 0.065344652 |
| ENSG00000114993 | 593.2091373 | 0.004017184  | 0.088987886 | 0.045143046  | 0.96399329  | 0.981105184 |
| ENSG00000114999 | 776.4343709 | -0.055460999 | 0.088716686 | -0.625147331 | 0.531874366 | 0.683490917 |
| ENSG00000115020 | 583.3636521 | -0.338099874 | 0.090432863 | -3.738683719 | 0.000184986 | 0.000998656 |
| ENSG00000115041 | 194.7459472 | 0.642598753  | 0.137223121 | 4.682875219  | 2.83E-06    | 2.28E-05    |
| ENSG00000115042 | 183.7599959 | 0.534884453  | 0.138695565 | 3.856536084  | 0.000115005 | 0.000654039 |
| ENSG00000115053 | 18313.82462 | 0.069475537  | 0.050673421 | 1.371044947  | 0.170360945 | 0.313317044 |
| ENSG00000115073 | 173.9483697 | 0.08856042   | 0.153054094 | 0.578621697  | 0.562844461 | 0.70902994  |
| ENSG00000115084 | 303.8144377 | -0.275137223 | 0.126459055 | -2.175702039 | 0.029577548 | 0.079577823 |
| ENSG00000115091 | 830.7553826 | 0.040984145  | 0.080172488 | 0.511199615  | 0.609211288 | 0.745434753 |
| ENSG00000115107 | 117.7602887 | 0.121649455  | 0.169377397 | 0.718215403  | 0.472624482 | 0.633981332 |
| ENSG00000115109 | 175.4203219 | -0.689593972 | 0.147253801 | -4.683030018 | 2.83E-06    | 2.28E-05    |
| ENSG00000115112 | 18.18874133 | -1.429167136 | 0.440496535 | -3.244445809 | 0.001176794 | 0.005170606 |
| ENSG00000115128 | 940.2729155 | 0.17339564   | 0.085813175 | 2.020617935  | 0.043319331 | 0.10908362  |
| ENSG00000115129 | 160.7640769 | -0.958547443 | 0.158666346 | -6.041277594 | 1.53E-09    | 2.09E-08    |
| ENSG00000115137 | 67.02022711 | 0.008083066  | 0.215130989 | 0.037572764  | 0.970028323 | 0.984394442 |
| ENSG00000115145 | 151.6206188 | -0.006806884 | 0.15512475  | -0.043880062 | 0.965000008 | 0.981631915 |
| ENSG00000115159 | 374.2436708 | -0.376450569 | 0.105109236 | -3.581517511 | 0.000341604 | 0.001726084 |
| ENSG00000115163 | 195.3513432 | -0.316112376 | 0.146464843 | -2.158281603 | 0.030905944 | 0.082503952 |
| ENSG00000115170 | 111.0106393 | -0.344256929 | 0.168748708 | -2.040056687 | 0.04134468  | 0.104926598 |
| ENSG00000115183 | 507.0423355 | -0.416346001 | 0.091982125 | -4.526379462 | 6.00E-06    | 4.53E-05    |
| ENSG00000115204 | 528.1048682 | 0.358430488  | 0.09018211  | 3.974518747  | 7.05E-05    | 0.00042011  |
| ENSG00000115207 | 671.6228654 | 0.088133059  | 0.082220696 | 1.071908456  | 0.283761152 | 0.453469044 |
| ENSG00000115211 | 535.2950199 | 0.128711231  | 0.098119158 | 1.311784907  | 0.189592719 | 0.338830651 |
| ENSG00000115216 | 853.1821082 | 0.018684112  | 0.08134558  | 0.22968811   | 0.818334135 | 0.892848047 |
| ENSG00000115226 | 40.1999799  | 0.971835011  | 0.292659405 | 3.320703161  | 0.00089791  | 0.004083179 |
| ENSG00000115232 | 13.30924724 | -7.013372925 | 1.241180934 | -5.650564501 | 1.60E-08    | 1.91E-07    |
| ENSG00000115233 | 353.6512384 | 0.499282274  | 0.107096696 | 4.661976431  | 3.13E-06    | 2.50E-05    |
| ENSG00000115234 | 501.5052838 | 0.340769469  | 0.092291961 | 3.692298486  | 0.000222236 | 0.001174917 |
| ENSG00000115239 | 163.2946114 | -0.326958883 | 0.147650677 | -2.214408286 | 0.026800705 | 0.073529201 |
| ENSG00000115241 | 2699.754875 | 0.140266587  | 0.059349395 | 2.36340382   | 0.018107926 | 0.053298107 |
| ENSG00000115252 | 14.04593045 | -5.26903675  | 1.06879441  | -4.929888015 | 8.23E-07    | 7.44E-06    |
| ENSG00000115255 | 141.3676055 | -1.088782761 | 0.158009031 | -6.890636268 | 5.55E-12    | 1.01E-10    |
| ENSG00000115257 | 19.37271353 | -0.479296433 | 0.412662054 | -1.16147445  | 0.245449008 | 0.408994331 |
| ENSG00000115263 | 40.55303252 | 1.956167023  | 0.308716603 | 6.336449045  | 2.35E-10    | 3.55E-09    |
| ENSG00000115266 | 197.630569  | -0.119290961 | 0.152464855 | -0.782416122 | 0.433970062 | 0.600174999 |
| ENSG00000115267 | 20.54393287 | 2.535304966  | 0.470816059 | 5.384916076  | 7.25E-08    | 7.77E-07    |
| ENSG00000115268 | 6145.167496 | 0.413276038  | 0.064866571 | 6.37117139   | 1.88E-10    | 2.86E-09    |
| ENSG00000115275 | 328.4168366 | 0.472874486  | 0.11195787  | 4.223682422  | 2.40E-05    | 0.0001588   |
| ENSG00000115282 | 209.5474242 | -0.126002724 | 0.130787266 | -0.963417368 | 0.335338114 | 0.507124904 |
| ENSG00000115286 | 562.6496985 | 0.300147352  | 0.089991498 | 3.33528564   | 0.000852118 | 0.003888793 |
| ENSG00000115289 | 141.6821583 | 0.333328272  | 0.162593189 | 2.050075243  | 0.040357089 | 0.102549933 |
| ENSG00000115295 | 317.6562757 | 0.467462094  | 0.108928855 | 4.291444116  | 1.78E-05    | 0.000120461 |
| ENSG00000115306 | 6510.619251 | 0.098848225  | 0.051701625 | 1.911897835  | 0.055889299 | 0.133063896 |
| ENSG00000115307 | 801.5342466 | 0.309728735  | 0.076098172 | 4.070120573  | 4.70E-05    | 0.000291028 |
| ENSG00000115310 | 1016.144951 | 0.047616798  | 0.078751088 | 0.604649407  | 0.545411971 | 0.694030433 |

|                 |             |              |             |              |             |             |
|-----------------|-------------|--------------|-------------|--------------|-------------|-------------|
| ENSG00000115317 | 99.34933561 | 0.571741569  | 0.181759025 | 3.145602085  | 0.001657453 | 0.006968646 |
| ENSG00000115318 | 63.25228199 | -1.015042634 | 0.234094939 | -4.336029811 | 1.45E-05    | 0.00010044  |
| ENSG00000115325 | 36.35836166 | 0.041102601  | 0.300671413 | 0.136702724  | 0.891265776 | 0.94027635  |
| ENSG00000115350 | 81.19873835 | 0.33795548   | 0.205728257 | 1.64272757   | 0.100439312 | 0.21040767  |
| ENSG00000115355 | 1231.58494  | -0.064004355 | 0.068889084 | -0.929092848 | 0.352840971 | 0.524204877 |
| ENSG00000115364 | 534.7262956 | 0.133035484  | 0.09052281  | 1.469634936  | 0.141660653 | 0.273300863 |
| ENSG00000115365 | 396.6785963 | -0.28070309  | 0.102093829 | -2.749461872 | 0.005969321 | 0.020750074 |
| ENSG00000115368 | 714.9461683 | -0.482218477 | 0.086411199 | -5.58050902  | 2.40E-08    | 2.79E-07    |
| ENSG00000115392 | 937.3476451 | -0.412456521 | 0.092999898 | -4.435021223 | 9.21E-06    | 6.64E-05    |
| ENSG00000115415 | 628.6940798 | 0.747632144  | 0.086142466 | 8.679019535  | 3.99E-18    | 1.21E-16    |
| ENSG00000115419 | 342.638021  | -0.042047732 | 0.109824632 | -0.382862487 | 0.701821727 | 0.813272546 |
| ENSG00000115421 | 156.8231292 | -0.324344504 | 0.143773265 | -2.255944481 | 0.024074108 | 0.067163654 |
| ENSG00000115423 | 18.43954287 | -2.263425646 | 0.477910352 | -4.736088343 | 2.18E-06    | 1.80E-05    |
| ENSG00000115425 | 88.26642219 | -0.649778043 | 0.189484268 | -3.429192574 | 0.00060538  | 0.002873866 |
| ENSG00000115446 | 65.49707361 | 0.185668703  | 0.217458904 | 0.853810533  | 0.393209977 | 0.561290936 |
| ENSG00000115457 | 1332.847403 | -0.920653538 | 0.172591725 | -5.334285523 | 9.59E-08    | 1.01E-06    |
| ENSG00000115459 | 53.28663564 | 0.130051281  | 0.24017857  | 0.541477457  | 0.588178532 | 0.72968478  |
| ENSG00000115461 | 94.17917206 | -5.399902116 | 0.442727074 | -12.19690965 | 3.23E-34    | 2.02E-32    |
| ENSG00000115464 | 1215.085286 | -0.090061958 | 0.074792233 | -1.204161903 | 0.228527008 | 0.387368031 |
| ENSG00000115468 | 154.4001695 | -1.704347924 | 0.163037351 | -10.45372677 | 1.41E-25    | 6.49E-24    |
| ENSG00000115484 | 2198.794301 | 0.366920043  | 0.065216656 | 5.626170782  | 1.84E-08    | 2.18E-07    |
| ENSG00000115486 | 255.9646494 | -0.141857344 | 0.116537752 | -1.217265148 | 0.22350335  | 0.38189412  |
| ENSG00000115504 | 308.47679   | -0.08840047  | 0.114988917 | -0.768773827 | 0.442027589 | 0.607074847 |
| ENSG00000115507 | 57.20818535 | 0.634227054  | 0.232173849 | 2.731690305  | 0.006301034 | 0.021736401 |
| ENSG00000115514 | 84.39049887 | -0.07623758  | 0.202395326 | -0.376676584 | 0.706413967 | 0.815678152 |
| ENSG00000115520 | 219.9611815 | 0.069473312  | 0.127122468 | 0.546506951  | 0.584717511 | 0.726667865 |
| ENSG00000115524 | 2743.541097 | 0.044516634  | 0.057091249 | 0.779745325  | 0.435540794 | 0.601695667 |
| ENSG00000115525 | 100.1259949 | 0.445208403  | 0.181369545 | 2.454703199  | 0.014100095 | 0.043141807 |
| ENSG00000115526 | 267.4756038 | -0.014666338 | 0.117354454 | -0.124974702 | 0.900543578 | 0.94621405  |
| ENSG00000115539 | 131.1357009 | -0.069781507 | 0.159017711 | -0.438828523 | 0.660785791 | 0.783076162 |
| ENSG00000115540 | 78.84362533 | -0.070200257 | 0.21373172  | -0.328450344 | 0.742571183 | 0.842628436 |
| ENSG00000115541 | 390.2115893 | 0.644861413  | 0.11143728  | 5.786765561  | 7.18E-09    | 9.00E-08    |
| ENSG00000115548 | 300.4293555 | 0.125018384  | 0.11109037  | 1.125375525  | 0.260429938 | 0.426569419 |
| ENSG00000115556 | 35.84298052 | 0.294246902  | 0.288614272 | 1.019516117  | 0.307958006 | 0.479110212 |
| ENSG00000115561 | 208.5065165 | -0.228136822 | 0.127836095 | -1.784604117 | 0.074325553 | 0.166292761 |
| ENSG00000115568 | 863.537458  | 0.235185727  | 0.075736874 | 3.105300176  | 0.00190086  | 0.007834912 |
| ENSG00000115594 | 18.91528996 | -0.693278892 | 0.419856619 | -1.651227729 | 0.098692083 | 0.207534086 |
| ENSG00000115616 | 33.07147897 | 2.256758981  | 0.345954564 | 6.523281421  | 6.88E-11    | 1.12E-09    |
| ENSG00000115641 | 79.64638271 | -0.158908062 | 0.203882022 | -0.779411838 | 0.435737153 | 0.601848553 |
| ENSG00000115649 | 137.5749751 | 0.189471794  | 0.153694749 | 1.232779881  | 0.2176579   | 0.374640426 |
| ENSG00000115652 | 498.3773148 | 0.146510828  | 0.092126207 | 1.590327372  | 0.111761032 | 0.228749412 |
| ENSG00000115657 | 57.68587991 | 0.190628539  | 0.231673019 | 0.822834439  | 0.410602149 | 0.57903106  |
| ENSG00000115661 | 98.93217256 | -0.023355315 | 0.190030175 | -0.12290319  | 0.902183759 | 0.947258155 |
| ENSG00000115677 | 5625.467074 | 0.303466895  | 0.051999815 | 5.835922567  | 5.35E-09    | 6.81E-08    |
| ENSG00000115685 | 301.6442046 | 0.403449074  | 0.111793871 | 3.608865774  | 0.000307539 | 0.001573196 |
| ENSG00000115687 | 223.0716081 | -0.215481113 | 0.124533723 | -1.730303313 | 0.083576098 | 0.182808074 |
| ENSG00000115694 | 546.0852582 | 0.083372117  | 0.088114678 | 0.946177406  | 0.344058108 | 0.515848463 |
| ENSG00000115738 | 218.3277805 | 1.789572333  | 0.139489778 | 12.82941558  | 1.12E-37    | 8.04E-36    |
| ENSG00000115750 | 91.52608655 | -0.118205923 | 0.207172685 | -0.570567121 | 0.568293111 | 0.713722708 |
| ENSG00000115756 | 80.35731709 | 0.346688854  | 0.204616244 | 1.694336911  | 0.09020128  | 0.193680432 |

|                 |             |              |             |              |             |             |
|-----------------|-------------|--------------|-------------|--------------|-------------|-------------|
| ENSG00000115758 | 811.4139323 | 0.305251804  | 0.091230031 | 3.345957454  | 0.00081999  | 0.003762952 |
| ENSG00000115760 | 2571.579016 | -0.45130655  | 0.063046544 | -7.158307568 | 8.17E-13    | 1.64E-11    |
| ENSG00000115761 | 452.7049493 | 0.115568991  | 0.094763487 | 1.219551905  | 0.222634788 | 0.380873325 |
| ENSG00000115762 | 299.8024899 | 0.270443386  | 0.11639472  | 2.323502187  | 0.02015219  | 0.0581388   |
| ENSG00000115806 | 782.1026333 | 0.03760541   | 0.080903931 | 0.464815601  | 0.642063514 | 0.768923285 |
| ENSG00000115808 | 795.0694171 | 0.093926608  | 0.08141111  | 1.153732056  | 0.248610037 | 0.412749377 |
| ENSG00000115816 | 494.5215192 | -0.58145582  | 0.093429263 | -6.223487158 | 4.86E-10    | 7.05E-09    |
| ENSG00000115825 | 607.8808922 | -0.763635599 | 0.087369632 | -8.74028635  | 2.33E-18    | 7.19E-17    |
| ENSG00000115827 | 194.1886927 | -0.042319289 | 0.131791415 | -0.321108086 | 0.748128483 | 0.846813924 |
| ENSG00000115828 | 67.66378275 | -6.228380664 | 0.6691834   | -9.307434501 | 1.31E-20    | 4.59E-19    |
| ENSG00000115839 | 506.5163624 | -0.067784947 | 0.090469193 | -0.749259989 | 0.453700518 | 0.617606294 |
| ENSG00000115840 | 357.9519825 | 0.409419907  | 0.102805017 | 3.982489569  | 6.82E-05    | 0.000407992 |
| ENSG00000115841 | 71.71027315 | -0.979626989 | 0.218785877 | -4.477560452 | 7.55E-06    | 5.56E-05    |
| ENSG00000115844 | 2564.148982 | -0.388398544 | 0.150385977 | -2.58267794  | 0.009803679 | 0.031716325 |
| ENSG00000115866 | 459.485637  | 0.237967661  | 0.099553609 | 2.390346916  | 0.016832465 | 0.050157301 |
| ENSG00000115875 | 987.5755796 | 0.331444482  | 0.073329136 | 4.519956183  | 6.19E-06    | 4.65E-05    |
| ENSG00000115884 | 624.8345102 | 0.284944551  | 0.096263824 | 2.960037732  | 0.003076014 | 0.011786851 |
| ENSG00000115902 | 196.0203247 | -0.367580258 | 0.155583096 | -2.362597658 | 0.018147359 | 0.053385541 |
| ENSG00000115904 | 1475.968318 | -0.592610195 | 0.069263503 | -8.555879597 | 1.17E-17    | 3.37E-16    |
| ENSG00000115935 | 141.2177695 | -0.181170232 | 0.154981376 | -1.168980668 | 0.24241142  | 0.405134232 |
| ENSG00000115942 | 353.939287  | -0.046179511 | 0.113418318 | -0.407160955 | 0.683889777 | 0.800149899 |
| ENSG00000115944 | 683.9362531 | 0.092071036  | 0.101698683 | 0.905331646  | 0.365289716 | 0.536514496 |
| ENSG00000115946 | 226.224915  | -0.146344319 | 0.1406203   | -1.040705501 | 0.29801225  | 0.468671974 |
| ENSG00000115947 | 258.0283164 | -0.262437521 | 0.118934757 | -2.206567085 | 0.027344319 | 0.074714189 |
| ENSG00000115963 | 55.92020283 | -4.432792696 | 0.435676614 | -10.17450226 | 2.58E-24    | 1.09E-22    |
| ENSG00000115966 | 405.801881  | -0.122046104 | 0.105447896 | -1.157406725 | 0.247106228 | 0.4112472   |
| ENSG00000115970 | 479.4538263 | -0.083461248 | 0.097674128 | -0.854486755 | 0.392835345 | 0.561073523 |
| ENSG00000115977 | 613.0640801 | -0.234321401 | 0.087826999 | -2.667988263 | 0.007630692 | 0.025698474 |
| ENSG00000115993 | 374.334307  | -0.262343041 | 0.105646221 | -2.483222201 | 0.013019984 | 0.040400203 |
| ENSG00000115998 | 90.17882141 | 0.201125097  | 0.186086568 | 1.080814696  | 0.27977955  | 0.448534962 |
| ENSG00000116001 | 283.2769438 | -0.442254011 | 0.118699344 | -3.725833657 | 0.000194671 | 0.001044116 |
| ENSG00000116005 | 745.7252623 | -0.17703721  | 0.088345639 | -2.003915651 | 0.045079097 | 0.112393694 |
| ENSG00000116014 | 15.92792629 | 0.356662259  | 0.44548082  | 0.800623154  | 0.423349843 | 0.590574257 |
| ENSG00000116017 | 552.305417  | -0.599954925 | 0.097012062 | -6.184333322 | 6.24E-10    | 8.94E-09    |
| ENSG00000116030 | 1443.469175 | 0.183509656  | 0.070378479 | 2.607468331  | 0.009121451 | 0.029859944 |
| ENSG00000116035 | 56.41516243 | -0.234046694 | 0.231730477 | -1.009995305 | 0.312497539 | 0.484076461 |
| ENSG00000116044 | 281.0362134 | -0.137980371 | 0.11471113  | -1.20285077  | 0.229034074 | 0.387861666 |
| ENSG00000116062 | 1975.657481 | -0.088222281 | 0.061020841 | -1.445772948 | 0.148240896 | 0.28246607  |
| ENSG00000116095 | 210.8801477 | -0.174295792 | 0.135891049 | -1.282614221 | 0.199627265 | 0.351641386 |
| ENSG00000116096 | 84.56961888 | 0.638724147  | 0.194000399 | 3.292385743  | 0.000993413 | 0.004466858 |
| ENSG00000116120 | 245.8022594 | 0.408257763  | 0.121750594 | 3.353230155  | 0.000798743 | 0.003672647 |
| ENSG00000116127 | 769.1628168 | -0.447600977 | 0.08218527  | -5.446243292 | 5.14E-08    | 5.68E-07    |
| ENSG00000116128 | 1079.947394 | -0.207450183 | 0.074830959 | -2.772250773 | 0.005567013 | 0.019589137 |
| ENSG00000116132 | 30.91068841 | -4.518723141 | 0.606930077 | -7.445212075 | 9.68E-14    | 2.12E-12    |
| ENSG00000116133 | 2223.617619 | -0.116273367 | 0.06657651  | -1.746462326 | 0.080730648 | 0.177802354 |
| ENSG00000116138 | 247.7933195 | -0.366134298 | 0.120561627 | -3.036905739 | 0.002390202 | 0.009505993 |
| ENSG00000116151 | 49.12752089 | -0.505644019 | 0.254855194 | -1.984044393 | 0.047250891 | 0.116568828 |
| ENSG00000116161 | 1160.148234 | 0.311656626  | 0.071584413 | 4.353693967  | 1.34E-05    | 9.35E-05    |
| ENSG00000116171 | 234.6835537 | -0.125659485 | 0.135704429 | -0.92597925  | 0.354456764 | 0.525826821 |
| ENSG00000116191 | 118.7349973 | 0.089996475  | 0.173285597 | 0.519353467  | 0.603514275 | 0.741285586 |

|                 |             |              |             |              |             |             |
|-----------------|-------------|--------------|-------------|--------------|-------------|-------------|
| ENSG00000116194 | 730.9884256 | 2.762797935  | 0.094754657 | 29.15738421  | 6.73E-187   | 5.26E-184   |
| ENSG00000116198 | 187.9829076 | 0.282134715  | 0.138368839 | 2.039004722  | 0.041449556 | 0.105154762 |
| ENSG00000116199 | 1016.519002 | 0.574989127  | 0.073326262 | 7.841516946  | 4.45E-15    | 1.07E-13    |
| ENSG00000116205 | 75.67177066 | 0.161848242  | 0.202062796 | 0.800979916  | 0.423143273 | 0.590374806 |
| ENSG00000116209 | 194.6263697 | -0.251920102 | 0.13306228  | -1.893249552 | 0.058324691 | 0.137556569 |
| ENSG00000116212 | 125.7339939 | 0.269922935  | 0.163725371 | 1.648632297  | 0.099222988 | 0.208463253 |
| ENSG00000116213 | 69.38313816 | 0.312749738  | 0.235417075 | 1.328492157  | 0.184015573 | 0.331393173 |
| ENSG00000116221 | 539.5057204 | 0.362016522  | 0.088407575 | 4.094858657  | 4.22E-05    | 0.000264077 |
| ENSG00000116237 | 576.3084222 | -0.065424698 | 0.098000882 | -0.66759295  | 0.504393459 | 0.66210774  |
| ENSG00000116251 | 505.828168  | -0.008989971 | 0.092250252 | -0.097451998 | 0.922367452 | 0.957117205 |
| ENSG00000116254 | 35.4547931  | -1.484411398 | 0.347096506 | -4.276653245 | 1.90E-05    | 0.00012782  |
| ENSG00000116260 | 515.3920416 | 0.271708737  | 0.101335121 | 2.681288916  | 0.007333917 | 0.024812025 |
| ENSG00000116266 | 95.79564991 | -0.380388293 | 0.185390822 | -2.051818363 | 0.040187318 | 0.102173983 |
| ENSG00000116273 | 204.8621316 | -0.581415004 | 0.137085921 | -4.24124519  | 2.22E-05    | 0.000147982 |
| ENSG00000116285 | 90.14517892 | -2.064672124 | 0.21310851  | -9.688360759 | 3.38E-22    | 1.28E-20    |
| ENSG00000116288 | 1090.8106   | 0.39696647   | 0.074578518 | 5.322799149  | 1.02E-07    | 1.07E-06    |
| ENSG00000116299 | 70.45120136 | -0.0280064   | 0.218150857 | -0.128380887 | 0.897847556 | 0.944497571 |
| ENSG00000116337 | 518.2096638 | -0.137783129 | 0.090725522 | -1.51868103  | 0.128842804 | 0.254765606 |
| ENSG00000116350 | 1242.819679 | -0.012743573 | 0.071863019 | -0.177331448 | 0.85924805  | 0.919748332 |
| ENSG00000116353 | 166.295995  | -0.038320087 | 0.148262873 | -0.258460436 | 0.796051579 | 0.878339214 |
| ENSG00000116396 | 102.5273132 | 0.133565048  | 0.1785985   | 0.747850897  | 0.454550098 | 0.618431859 |
| ENSG00000116406 | 430.6981997 | 0.245714002  | 0.094986603 | 2.586827974  | 0.009686394 | 0.031423735 |
| ENSG00000116455 | 123.9206315 | 0.238625653  | 0.163001281 | 1.463949558  | 0.143207731 | 0.275453786 |
| ENSG00000116459 | 629.8663097 | -0.75786728  | 0.092727082 | -8.17309535  | 3.01E-16    | 7.94E-15    |
| ENSG00000116473 | 122.8523298 | -0.174740557 | 0.165860646 | -1.05353838  | 0.292094314 | 0.462575967 |
| ENSG00000116478 | 1642.970501 | 0.036928142  | 0.079416686 | 0.464992234  | 0.641937018 | 0.768868459 |
| ENSG00000116489 | 858.8753549 | 0.284206414  | 0.082279469 | 3.454159559  | 0.000552011 | 0.002645546 |
| ENSG00000116497 | 297.2246026 | -0.193621443 | 0.111251786 | -1.740389531 | 0.081790643 | 0.179770483 |
| ENSG00000116514 | 108.821536  | 0.027842102  | 0.185655012 | 0.149966876  | 0.880790749 | 0.934253325 |
| ENSG00000116521 | 574.4046277 | 0.210277216  | 0.096054956 | 2.189134473  | 0.028587068 | 0.077432036 |
| ENSG00000116525 | 97.83608214 | -0.360696361 | 0.178974572 | -2.015349761 | 0.043868014 | 0.110215346 |
| ENSG00000116539 | 1719.579079 | 0.056498477  | 0.070447701 | 0.801991775  | 0.422557716 | 0.590003496 |
| ENSG00000116560 | 4814.981671 | -0.216274972 | 0.052962274 | -4.083566605 | 4.43E-05    | 0.000276266 |
| ENSG00000116580 | 566.3884537 | -0.082360179 | 0.091279456 | -0.902286036 | 0.366904941 | 0.53821154  |
| ENSG00000116584 | 551.7000904 | -0.280163895 | 0.090476492 | -3.096537991 | 0.001957948 | 0.008030158 |
| ENSG00000116586 | 544.853704  | 0.221040106  | 0.091943461 | 2.404087297  | 0.016212901 | 0.048631779 |
| ENSG00000116604 | 1243.793793 | 0.309007744  | 0.069366707 | 4.454698213  | 8.40E-06    | 6.13E-05    |
| ENSG00000116641 | 549.6980901 | 0.077675734  | 0.088221345 | 0.880464181  | 0.378607901 | 0.547981993 |
| ENSG00000116649 | 1697.716184 | 0.81507469   | 0.066256808 | 12.30175     | 8.86E-35    | 5.71E-33    |
| ENSG00000116661 | 292.362274  | -1.237311368 | 0.116715053 | -10.60112929 | 2.94E-26    | 1.39E-24    |
| ENSG00000116667 | 99.51949321 | 0.29687928   | 0.181778971 | 1.633188255  | 0.102429409 | 0.21372934  |
| ENSG00000116668 | 21.72538781 | 0.571853279  | 0.368057741 | 1.553705343  | 0.120254718 | 0.242286005 |
| ENSG00000116670 | 163.0019726 | 0.455813252  | 0.147174495 | 3.097094035  | 0.001954279 | 0.008019793 |
| ENSG00000116675 | 52.6788247  | 4.752496569  | 0.456371212 | 10.41366423  | 2.15E-25    | 9.83E-24    |
| ENSG00000116679 | 361.2324646 | -0.111695466 | 0.108798508 | -1.026626821 | 0.30459622  | 0.475495347 |
| ENSG00000116685 | 639.5956578 | 0.220436859  | 0.085262242 | 2.585398336  | 0.009726655 | 0.031532501 |
| ENSG00000116688 | 944.5629288 | 0.124993928  | 0.073321381 | 1.704740518  | 0.08824283  | 0.190289688 |
| ENSG00000116691 | 77.4655987  | -0.022309593 | 0.212800426 | -0.104838101 | 0.916504276 | 0.954800179 |
| ENSG00000116698 | 1505.957303 | -0.021283129 | 0.069318065 | -0.307035817 | 0.75881611  | 0.85471012  |
| ENSG00000116704 | 118.5839797 | -0.312007482 | 0.162887265 | -1.915481123 | 0.055431174 | 0.132264601 |

|                 |             |              |             |              |             |             |
|-----------------|-------------|--------------|-------------|--------------|-------------|-------------|
| ENSG00000116711 | 25.37042338 | 3.318608582  | 0.46867009  | 7.080905429  | 1.43E-12    | 2.82E-11    |
| ENSG00000116717 | 120.4438517 | -0.408590911 | 0.173091683 | -2.360546179 | 0.018248046 | 0.053617588 |
| ENSG00000116731 | 627.5784008 | -0.109409549 | 0.087499122 | -1.250407393 | 0.211150765 | 0.366275621 |
| ENSG00000116741 | 74.15599848 | -0.069562839 | 0.203657779 | -0.341567306 | 0.732676545 | 0.835382096 |
| ENSG00000116747 | 1011.354869 | -0.042339501 | 0.081771942 | -0.517775413 | 0.604614975 | 0.741943439 |
| ENSG00000116750 | 708.7340861 | 0.079382834  | 0.079097651 | 1.003605449  | 0.315568827 | 0.486959828 |
| ENSG00000116752 | 140.7177416 | 0.068679115  | 0.151932832 | 0.452036036  | 0.651243022 | 0.7759127   |
| ENSG00000116754 | 1320.333371 | 0.180956433  | 0.070572362 | 2.564126056  | 0.010343597 | 0.033256239 |
| ENSG00000116761 | 25.70927987 | -0.916850372 | 0.354805526 | -2.584092703 | 0.009763555 | 0.031608355 |
| ENSG00000116786 | 392.4578008 | 0.202153576  | 0.106170564 | 1.904045422  | 0.056904269 | 0.134885971 |
| ENSG00000116791 | 106.500173  | 0.036048886  | 0.170833125 | 0.211018127  | 0.832873126 | 0.902241753 |
| ENSG00000116793 | 152.8589173 | -0.200816763 | 0.148317512 | -1.353965288 | 0.175747452 | 0.320488701 |
| ENSG00000116809 | 179.8348499 | 0.066552407  | 0.137677452 | 0.483393661  | 0.628816248 | 0.759303863 |
| ENSG00000116815 | 36.78532301 | 0.357052636  | 0.285468812 | 1.250758826  | 0.211022481 | 0.366274791 |
| ENSG00000116830 | 529.6777653 | -0.047762632 | 0.089178777 | -0.535582949 | 0.592246816 | 0.73258991  |
| ENSG00000116852 | 20.30861011 | -0.628949982 | 0.405201377 | -1.552191125 | 0.120616499 | 0.242805956 |
| ENSG00000116857 | 397.3355979 | 0.049014062  | 0.105935906 | 0.462676573  | 0.643596213 | 0.770067802 |
| ENSG00000116863 | 88.52389403 | 0.60953096   | 0.195763086 | 3.113615403  | 0.001848102 | 0.007648878 |
| ENSG00000116871 | 1208.285267 | 0.208072543  | 0.078173704 | 2.661669242  | 0.007775424 | 0.026117021 |
| ENSG00000116874 | 96.42088355 | 0.086196435  | 0.183627447 | 0.469409319  | 0.638777089 | 0.766678698 |
| ENSG00000116885 | 15.06214805 | -1.224885382 | 0.472462788 | -2.592554194 | 0.009526617 | 0.03099129  |
| ENSG00000116898 | 482.742331  | 0.278678347  | 0.093672643 | 2.975023858  | 0.002929658 | 0.011302637 |
| ENSG00000116903 | 168.2018398 | 0.05821911   | 0.139690826 | 0.416771178  | 0.676845786 | 0.794803163 |
| ENSG00000116906 | 256.7073947 | -0.050171094 | 0.134789322 | -0.372218607 | 0.709730093 | 0.818195874 |
| ENSG00000116918 | 151.212285  | 0.178386716  | 0.159149175 | 1.120877421  | 0.262340043 | 0.428598579 |
| ENSG00000116922 | 144.2844112 | 0.354718764  | 0.16329803  | 2.172217041  | 0.029839296 | 0.080097953 |
| ENSG00000116954 | 130.1046631 | 0.9177024    | 0.160845445 | 5.705491997  | 1.16E-08    | 1.41E-07    |
| ENSG00000116962 | 5027.106647 | 0.043038608  | 0.059594727 | 0.722188189  | 0.470178784 | 0.63201927  |
| ENSG00000116977 | 38.46955098 | -4.905732539 | 0.593337105 | -8.268035996 | 1.36E-16    | 3.67E-15    |
| ENSG00000116981 | 10.2641163  | -1.037495407 | 0.597042203 | -1.737725409 | 0.082259209 | 0.180489708 |
| ENSG00000116983 | 64.43797666 | -2.659427197 | 0.273168824 | -9.735471104 | 2.13E-22    | 8.15E-21    |
| ENSG00000116984 | 1206.396293 | -0.049629257 | 0.073238658 | -0.677637439 | 0.498001602 | 0.6560741   |
| ENSG00000116985 | 148.8901265 | 0.258893382  | 0.157759193 | 1.641066855  | 0.100783538 | 0.210921687 |
| ENSG00000116990 | 10.48376789 | -0.554115847 | 0.549094238 | -1.009145258 | 0.312904975 | 0.484076461 |
| ENSG00000117000 | 236.7417397 | -0.082769926 | 0.124931861 | -0.662520557 | 0.507637665 | 0.664441509 |
| ENSG00000117010 | 25.47155057 | -0.389253158 | 0.35122512  | -1.108272544 | 0.267744129 | 0.434647149 |
| ENSG00000117013 | 69.71923131 | 0.562282397  | 0.216683351 | 2.594949698  | 0.009460476 | 0.030783255 |
| ENSG00000117016 | 17.98292109 | -1.217295308 | 0.430320673 | -2.828809735 | 0.004672147 | 0.016901138 |
| ENSG00000117036 | 341.5307695 | 0.315502812  | 0.110407815 | 2.857613036  | 0.004268406 | 0.015650821 |
| ENSG00000117054 | 446.1860293 | -0.171047172 | 0.093262466 | -1.834040854 | 0.06664793  | 0.153074472 |
| ENSG00000117114 | 272.0108738 | -1.213518979 | 0.123667726 | -9.812737883 | 9.92E-23    | 3.85E-21    |
| ENSG00000117115 | 52.14153616 | -0.648264448 | 0.24584967  | -2.636832691 | 0.008368409 | 0.02781615  |
| ENSG00000117118 | 661.9031811 | 0.41158087   | 0.090314228 | 4.557209646  | 5.18E-06    | 3.96E-05    |
| ENSG00000117122 | 821.5368162 | 0.094122822  | 0.087189431 | 1.079521007  | 0.280355534 | 0.449150797 |
| ENSG00000117133 | 416.4631315 | 0.020190234  | 0.100649608 | 0.200599227  | 0.841011962 | 0.907697202 |
| ENSG00000117139 | 1060.49206  | -0.278754081 | 0.074166973 | -3.758466473 | 0.000170958 | 0.000928993 |
| ENSG00000117143 | 276.4956884 | 0.447615309  | 0.114282441 | 3.916746129  | 8.98E-05    | 0.000522049 |
| ENSG00000117151 | 44.51429987 | -0.614503577 | 0.279150197 | -2.201336711 | 0.027712196 | 0.075528369 |
| ENSG00000117153 | 296.7647283 | -0.094835936 | 0.116130852 | -0.816629978 | 0.414139918 | 0.582431606 |
| ENSG00000117155 | 255.9562912 | -0.293207969 | 0.11771692  | -2.49078865  | 0.012745991 | 0.0396903   |

|                 |             |              |             |              |             |             |
|-----------------|-------------|--------------|-------------|--------------|-------------|-------------|
| ENSG00000117174 | 349.5704733 | 0.449758422  | 0.1132946   | 3.969813406  | 7.19E-05    | 0.000427044 |
| ENSG00000117222 | 309.1958976 | -0.686157545 | 0.110835539 | -6.190771925 | 5.99E-10    | 8.60E-09    |
| ENSG00000117228 | 45.60668172 | 0.629879497  | 0.260490829 | 2.41804865   | 0.01560399  | 0.047086843 |
| ENSG00000117242 | 128.1923648 | 0.256304908  | 0.158234107 | 1.619782949  | 0.10527891  | 0.21834532  |
| ENSG00000117245 | 50.93845373 | -0.894855557 | 0.253216377 | -3.533956095 | 0.000409389 | 0.002023465 |
| ENSG00000117262 | 74.06876431 | -0.875792025 | 0.216265155 | -4.049621509 | 5.13E-05    | 0.000314681 |
| ENSG00000117266 | 165.3697    | -1.716653369 | 0.156389958 | -10.97674932 | 4.94E-28    | 2.50E-26    |
| ENSG00000117280 | 161.7433594 | 0.204658641  | 0.146939277 | 1.392810999  | 0.163676951 | 0.304203511 |
| ENSG00000117298 | 405.9097179 | -0.083847647 | 0.098615068 | -0.850251875 | 0.395185066 | 0.563217718 |
| ENSG00000117305 | 57.28635349 | 0.073884949  | 0.233584596 | 0.316309167  | 0.751767854 | 0.849700921 |
| ENSG00000117308 | 188.0352176 | 0.124922253  | 0.146470103 | 0.852885676  | 0.393722706 | 0.561769716 |
| ENSG00000117318 | 525.5939678 | 0.776096884  | 0.089052502 | 8.715048608  | 2.91E-18    | 8.89E-17    |
| ENSG00000117335 | 724.230257  | -0.084280279 | 0.080669642 | -1.044758319 | 0.296134684 | 0.466579334 |
| ENSG00000117360 | 687.9476005 | 0.042741632  | 0.082148029 | 0.52030015   | 0.602854392 | 0.740948083 |
| ENSG00000117362 | 419.3714292 | 0.049131421  | 0.103091812 | 0.476579276  | 0.633661744 | 0.763121272 |
| ENSG00000117385 | 359.1554603 | -0.806833263 | 0.107131803 | -7.531220834 | 5.03E-14    | 1.13E-12    |
| ENSG00000117394 | 270.7720109 | -0.374276317 | 0.114738299 | -3.261999889 | 0.001106292 | 0.004913083 |
| ENSG00000117395 | 736.173199  | 0.08774477   | 0.096156223 | 0.912523052  | 0.36149344  | 0.532441895 |
| ENSG00000117399 | 533.511097  | 0.151936476  | 0.09963971  | 1.524858667  | 0.127294353 | 0.252485707 |
| ENSG00000117407 | 10.88456434 | -1.674936592 | 0.575458056 | -2.910614551 | 0.003607187 | 0.013555419 |
| ENSG00000117408 | 104.1360085 | -0.068006192 | 0.174280057 | -0.390212129 | 0.696379693 | 0.809436951 |
| ENSG00000117410 | 187.3212181 | 0.644722136  | 0.144510243 | 4.461428648  | 8.14E-06    | 5.96E-05    |
| ENSG00000117411 | 266.7116869 | 0.176890865  | 0.116683506 | 1.515988594  | 0.129522237 | 0.256012817 |
| ENSG00000117419 | 368.8150149 | 0.330055209  | 0.100406116 | 3.287202232  | 0.001011881 | 0.004541181 |
| ENSG00000117425 | 22.41502853 | -0.457774337 | 0.365299499 | -1.253148001 | 0.21015185  | 0.365252634 |
| ENSG00000117448 | 329.2216678 | 0.182652387  | 0.112743698 | 1.620067368  | 0.105217806 | 0.218250816 |
| ENSG00000117450 | 1106.937357 | 0.370168808  | 0.083317078 | 4.442892356  | 8.88E-06    | 6.44E-05    |
| ENSG00000117461 | 255.8159189 | 0.028174287  | 0.116875067 | 0.241063284  | 0.809506069 | 0.887468333 |
| ENSG00000117475 | 106.5753388 | 0.370953839  | 0.182835342 | 2.028895706  | 0.042468914 | 0.10739169  |
| ENSG00000117477 | 91.04398444 | 1.220037833  | 0.197725982 | 6.170346563  | 6.81E-10    | 9.72E-09    |
| ENSG00000117479 | 196.656728  | 0.169366011  | 0.136122959 | 1.244213407  | 0.213421031 | 0.368930004 |
| ENSG00000117481 | 242.459236  | 0.033416512  | 0.121851261 | 0.274240185  | 0.783900048 | 0.871011269 |
| ENSG00000117500 | 405.503037  | -0.09788707  | 0.096978866 | -1.009364977 | 0.312799629 | 0.484076461 |
| ENSG00000117505 | 476.9205891 | 0.091821004  | 0.104524305 | 0.878465576  | 0.379691111 | 0.549218745 |
| ENSG00000117519 | 716.8083875 | 0.27522086   | 0.090247206 | 3.049633024  | 0.002291211 | 0.009181829 |
| ENSG00000117523 | 10482.37327 | -0.068586252 | 0.055006763 | -1.246869432 | 0.212445377 | 0.367650635 |
| ENSG00000117528 | 265.9812463 | -0.301423866 | 0.119363893 | -2.52525164  | 0.011561547 | 0.036487318 |
| ENSG00000117533 | 112.5829176 | -0.410854433 | 0.168204253 | -2.442592423 | 0.014582195 | 0.044423357 |
| ENSG00000117543 | 97.51803202 | 0.134083131  | 0.178586212 | 0.750803376  | 0.452770997 | 0.617363056 |
| ENSG00000117569 | 303.3013368 | -0.148029181 | 0.111833186 | -1.323660588 | 0.185615793 | 0.333590717 |
| ENSG00000117586 | 9.029415508 | -0.266811406 | 0.570260229 | -0.467876581 | 0.639872852 | 0.767565619 |
| ENSG00000117592 | 1586.767055 | 0.350767363  | 0.07863287  | 4.460823603  | 8.16E-06    | 5.97E-05    |
| ENSG00000117593 | 360.1604465 | -0.566721406 | 0.112322305 | -5.045493024 | 4.52E-07    | 4.29E-06    |
| ENSG00000117597 | 250.3033685 | 0.120427991  | 0.12456943  | 0.966753976  | 0.333667037 | 0.50583001  |
| ENSG00000117602 | 63.54213023 | -1.072953001 | 0.231603451 | -4.632715949 | 3.61E-06    | 2.86E-05    |
| ENSG00000117614 | 594.3847308 | 0.283804614  | 0.088034727 | 3.223780228  | 0.001265105 | 0.005508656 |
| ENSG00000117616 | 222.3478824 | 0.399303914  | 0.132189678 | 3.020689061  | 0.002522002 | 0.009962475 |
| ENSG00000117620 | 125.8786433 | -0.453156784 | 0.16056423  | -2.822277321 | 0.004768392 | 0.017192404 |
| ENSG00000117625 | 413.1043737 | -0.183898298 | 0.100002657 | -1.838934118 | 0.065924877 | 0.151835833 |
| ENSG00000117632 | 840.6317773 | -0.235309149 | 0.096919818 | -2.427874427 | 0.015187601 | 0.046002712 |

|                 |             |              |             |              |             |             |
|-----------------|-------------|--------------|-------------|--------------|-------------|-------------|
| ENSG00000117640 | 182.7510702 | -0.171109844 | 0.134833189 | -1.269048413 | 0.204423798 | 0.357690718 |
| ENSG00000117643 | 55.19244787 | 0.411188859  | 0.23468317  | 1.75210203   | 0.079756265 | 0.176070447 |
| ENSG00000117650 | 230.33163   | -0.080542527 | 0.13245889  | -0.608056781 | 0.543149815 | 0.692169604 |
| ENSG00000117676 | 144.4211416 | -0.548651325 | 0.157835216 | -3.47610209  | 0.000508759 | 0.002458133 |
| ENSG00000117682 | 161.8484083 | 0.133522367  | 0.143850462 | 0.928202556  | 0.353302509 | 0.52460864  |
| ENSG00000117691 | 431.9298577 | 0.630535967  | 0.09936332  | 6.345761847  | 2.21E-10    | 3.36E-09    |
| ENSG00000117697 | 430.9802087 | -0.179153886 | 0.094042959 | -1.905021782 | 0.05677724  | 0.134740606 |
| ENSG00000117713 | 2303.805255 | -0.133580824 | 0.062961431 | -2.121629401 | 0.033868871 | 0.088976255 |
| ENSG00000117724 | 3885.123433 | -0.123778405 | 0.059261603 | -2.088677986 | 0.03673672  | 0.095140248 |
| ENSG00000117748 | 445.6499501 | 0.200237145  | 0.097994016 | 2.043360931  | 0.041016722 | 0.10415074  |
| ENSG00000117751 | 269.1628651 | 0.012841611  | 0.116286331 | 0.110430959  | 0.912067601 | 0.952834567 |
| ENSG00000117758 | 94.47197495 | 0.142945131  | 0.184284673 | 0.775675633  | 0.437940531 | 0.603467788 |
| ENSG00000117859 | 682.4455671 | -0.322433585 | 0.081555771 | -3.953534868 | 7.70E-05    | 0.000454874 |
| ENSG00000117862 | 137.8726016 | 0.549580949  | 0.17287503  | 3.179064943  | 0.00147751  | 0.006314141 |
| ENSG00000117868 | 603.9424227 | 0.348680375  | 0.086457059 | 4.032989083  | 5.51E-05    | 0.000334744 |
| ENSG00000117877 | 338.7828045 | -0.231178195 | 0.104783043 | -2.206255779 | 0.027366096 | 0.074730083 |
| ENSG00000117899 | 815.3199681 | 0.225728465  | 0.079167393 | 2.851280777  | 0.00435435  | 0.015920238 |
| ENSG00000117906 | 753.0774802 | 0.081973697  | 0.083917936 | 0.976831668  | 0.328652495 | 0.501039896 |
| ENSG00000117971 | 11.47796477 | 0.096571293  | 0.512580519 | 0.188402192  | 0.850561381 | 0.914421837 |
| ENSG00000117984 | 183.1036683 | 0.531679875  | 0.305799053 | 1.738657692  | 0.082094992 | 0.180213839 |
| ENSG00000118004 | 30.13323208 | 1.180546948  | 0.323999556 | 3.643668412  | 0.00026878  | 0.001393191 |
| ENSG00000118007 | 399.9285037 | 0.363512223  | 0.100930455 | 3.601610854  | 0.000316252 | 0.001610727 |
| ENSG00000118046 | 339.9666986 | 0.346594093  | 0.1253138   | 2.765809457  | 0.00567817  | 0.01990548  |
| ENSG00000118058 | 1570.512688 | -0.209549533 | 0.069378116 | -3.020398165 | 0.002524426 | 0.009969246 |
| ENSG00000118096 | 24.08831602 | -0.956770419 | 0.366588356 | -2.609931281 | 0.009056041 | 0.029673481 |
| ENSG00000118160 | 59.30064592 | 0.056331614  | 0.229073019 | 0.245911171  | 0.805750996 | 0.885189466 |
| ENSG00000118162 | 41.63302205 | 0.301570214  | 0.267092601 | 1.129084869  | 0.258862034 | 0.424744187 |
| ENSG00000118181 | 4523.703086 | 0.273819332  | 0.146440454 | 1.869833953  | 0.06150688  | 0.14363876  |
| ENSG00000118193 | 611.7101786 | -0.20603321  | 0.091476643 | -2.252304008 | 0.024303067 | 0.06768144  |
| ENSG00000118197 | 241.3972121 | -0.096857814 | 0.122844057 | -0.78846154  | 0.430426786 | 0.597156056 |
| ENSG00000118200 | 852.2637234 | 0.115410087  | 0.076822557 | 1.502294262  | 0.13302113  | 0.261298813 |
| ENSG00000118217 | 576.3675576 | 0.168832482  | 0.087078547 | 1.938852772  | 0.052519268 | 0.126759134 |
| ENSG00000118242 | 10.69822618 | -0.047650678 | 0.537907511 | -0.088585262 | 0.929411521 | 0.961585302 |
| ENSG00000118246 | 80.68607557 | -0.184784713 | 0.200944268 | -0.919581907 | 0.357791285 | 0.529152893 |
| ENSG00000118260 | 316.8993265 | -0.217591097 | 0.112191508 | -1.939461375 | 0.052445183 | 0.126645606 |
| ENSG00000118276 | 135.0647747 | -1.470826301 | 0.169138794 | -8.695972508 | 3.44E-18    | 1.05E-16    |
| ENSG00000118292 | 85.84045164 | -1.109933898 | 0.205934416 | -5.389744562 | 7.06E-08    | 7.58E-07    |
| ENSG00000118298 | 157.5240462 | -1.442587487 | 0.154801615 | -9.318943401 | 1.18E-20    | 4.13E-19    |
| ENSG00000118363 | 99.72813243 | 0.070879243  | 0.203472776 | 0.348347549  | 0.727579188 | 0.831595187 |
| ENSG00000118369 | 70.42125956 | 0.030300752  | 0.212813129 | 0.142381968  | 0.886778305 | 0.938065731 |
| ENSG00000118402 | 206.2948303 | -0.018754253 | 0.133579687 | -0.140397491 | 0.88834594  | 0.938875587 |
| ENSG00000118412 | 423.0096301 | -0.299912866 | 0.101305463 | -2.960480698 | 0.003071594 | 0.011779054 |
| ENSG00000118418 | 2715.697758 | -1.187163618 | 0.06120932  | -19.39514463 | 8.48E-84    | 1.65E-81    |
| ENSG00000118420 | 40.97420748 | 0.116046377  | 0.279754404 | 0.414815192  | 0.678277197 | 0.795757928 |
| ENSG00000118454 | 190.6927346 | -0.390668544 | 0.13264491  | -2.945220772 | 0.003227243 | 0.012288145 |
| ENSG00000118482 | 1526.617348 | -0.356397467 | 0.068381181 | -5.21192324  | 1.87E-07    | 1.89E-06    |
| ENSG00000118495 | 351.1001372 | 0.261129112  | 0.1052429   | 2.481204073  | 0.013093938 | 0.04059381  |
| ENSG00000118496 | 209.3978316 | -0.341461311 | 0.131345734 | -2.599713761 | 0.009330155 | 0.030472143 |
| ENSG00000118503 | 25.88219673 | 1.018027422  | 0.343032598 | 2.967727932  | 0.003000098 | 0.011536373 |
| ENSG00000118507 | 49.48413506 | -0.285289148 | 0.254236241 | -1.122141936 | 0.261802096 | 0.428099137 |

|                 |             |              |             |              |             |             |
|-----------------|-------------|--------------|-------------|--------------|-------------|-------------|
| ENSG00000118508 | 310.9596822 | 0.33851791   | 0.114768204 | 2.94957922   | 0.00318207  | 0.012149643 |
| ENSG00000118513 | 87.3472728  | -1.586827584 | 0.204017506 | -7.777899122 | 7.37E-15    | 1.75E-13    |
| ENSG00000118514 | 10.30181253 | -1.4209431   | 0.577170406 | -2.461912608 | 0.013819834 | 0.042404369 |
| ENSG00000118515 | 11.50925958 | -1.033610689 | 0.557621317 | -1.853606842 | 0.063795428 | 0.14787696  |
| ENSG00000118518 | 77.34987446 | -0.104242417 | 0.202826322 | -0.513949157 | 0.607287538 | 0.743988143 |
| ENSG00000118523 | 72.31450942 | -2.13736151  | 0.241264573 | -8.858994445 | 8.07E-19    | 2.58E-17    |
| ENSG00000118557 | 36.94016232 | -0.559835115 | 0.293978009 | -1.904343514 | 0.056865461 | 0.134850849 |
| ENSG00000118564 | 190.5811726 | -0.151420128 | 0.136286929 | -1.111039259 | 0.266551451 | 0.433380991 |
| ENSG00000118579 | 266.2766549 | -0.021745039 | 0.115234235 | -0.18870294  | 0.850325647 | 0.914361666 |
| ENSG00000118596 | 222.9206124 | 0.675308815  | 0.137279406 | 4.919228864  | 8.69E-07    | 7.79E-06    |
| ENSG00000118600 | 84.12790874 | 0.333073052  | 0.191745726 | 1.737055937  | 0.082377298 | 0.180692365 |
| ENSG00000118620 | 44.55819701 | -0.135988613 | 0.264738134 | -0.513672175 | 0.607481209 | 0.744127919 |
| ENSG00000118640 | 92.98835214 | -0.730282952 | 0.198827823 | -3.672941439 | 0.000239774 | 0.001257697 |
| ENSG00000118655 | 147.0655828 | 0.202506748  | 0.147425571 | 1.373620245  | 0.169559609 | 0.312171358 |
| ENSG00000118680 | 847.7855405 | -0.098713161 | 0.085183443 | -1.158830375 | 0.246525333 | 0.410447002 |
| ENSG00000118689 | 203.3844207 | -0.20331762  | 0.136436304 | -1.490201753 | 0.136171196 | 0.265703534 |
| ENSG00000118690 | 11.34800313 | 0.510372314  | 0.515904651 | 0.989276436  | 0.32252791  | 0.494364363 |
| ENSG00000118705 | 1560.356929 | 0.466307133  | 0.070095011 | 6.652501014  | 2.88E-11    | 4.85E-10    |
| ENSG00000118707 | 351.7905407 | 0.089831307  | 0.107509753 | 0.835564255  | 0.403400085 | 0.571686944 |
| ENSG00000118733 | 13.45737804 | -1.297295443 | 0.496966399 | -2.610428884 | 0.009042877 | 0.02963726  |
| ENSG00000118762 | 248.2455454 | 0.147469302  | 0.125646958 | 1.173679843  | 0.240523287 | 0.402985521 |
| ENSG00000118785 | 238.6251959 | 4.939013763  | 0.235300807 | 20.99021178  | 8.06E-98    | 1.95E-95    |
| ENSG00000118816 | 1772.4872   | 0.035878269  | 0.071840171 | 0.49941792   | 0.617484997 | 0.751499892 |
| ENSG00000118855 | 134.3026313 | 0.675752197  | 0.15814619  | 4.272959067  | 1.93E-05    | 0.000129895 |
| ENSG00000118873 | 713.9491795 | 0.111630604  | 0.081025782 | 1.377717078  | 0.168290657 | 0.310559492 |
| ENSG00000118894 | 75.162927   | 0.216626201  | 0.203912268 | 1.062350015  | 0.288076817 | 0.458124652 |
| ENSG00000118898 | 10.37662288 | -0.695979714 | 0.54391304  | -1.279579018 | 0.200693233 | 0.353009998 |
| ENSG00000118900 | 523.645126  | 0.041816712  | 0.095259831 | 0.438975289  | 0.660679442 | 0.783076162 |
| ENSG00000118922 | 48.0270056  | -4.198501534 | 0.443026726 | -9.47685836  | 2.62E-21    | 9.54E-20    |
| ENSG00000118946 | 31.26785654 | -0.662651014 | 0.330201895 | -2.006805605 | 0.044770366 | 0.111782675 |
| ENSG00000118960 | 267.1541271 | 0.14262724   | 0.132833042 | 1.073733141  | 0.282942303 | 0.452333908 |
| ENSG00000118965 | 401.2132202 | -0.29070888  | 0.101140355 | -2.874311443 | 0.004049095 | 0.014959924 |
| ENSG00000118971 | 2800.100463 | -1.067377534 | 0.066650943 | -16.01444021 | 1.01E-57    | 1.27E-55    |
| ENSG00000118985 | 57.46959916 | -2.437930725 | 0.281528209 | -8.659632129 | 4.73E-18    | 1.42E-16    |
| ENSG00000119004 | 207.9636739 | -0.136822366 | 0.130093662 | -1.051721994 | 0.292927117 | 0.463541004 |
| ENSG00000119013 | 716.8635167 | 0.29330447   | 0.083729665 | 3.502993463  | 0.000460061 | 0.002247817 |
| ENSG00000119041 | 552.4877595 | 0.332111807  | 0.08850412  | 3.752501091  | 0.000175079 | 0.00094955  |
| ENSG00000119048 | 191.1330753 | -0.121044436 | 0.134756854 | -0.898243258 | 0.369055876 | 0.540463708 |
| ENSG00000119121 | 101.7212273 | -0.168135027 | 0.184022429 | -0.91366595  | 0.360892401 | 0.532058728 |
| ENSG00000119125 | 111.3446862 | 1.265182937  | 0.178354735 | 7.093632441  | 1.31E-12    | 2.58E-11    |
| ENSG00000119138 | 336.5634792 | 0.042652888  | 0.108015074 | 0.394879038  | 0.692932161 | 0.806697999 |
| ENSG00000119139 | 23.30126502 | 1.015287881  | 0.378289706 | 2.683889793  | 0.007277109 | 0.024661411 |
| ENSG00000119185 | 281.0953208 | 0.337456093  | 0.123261032 | 2.737735417  | 0.006186382 | 0.021393431 |
| ENSG00000119203 | 363.4426804 | -0.340485223 | 0.105985923 | -3.212551366 | 0.001315616 | 0.005700327 |
| ENSG00000119231 | 474.8977562 | -0.028612326 | 0.093887044 | -0.304752659 | 0.76055454  | 0.855365062 |
| ENSG00000119242 | 395.5749291 | 0.316559212  | 0.102693355 | 3.08256764   | 0.002052231 | 0.008343759 |
| ENSG00000119280 | 165.5752842 | 0.022202045  | 0.149740214 | 0.148270426  | 0.882129354 | 0.935107024 |
| ENSG00000119285 | 1496.435719 | 0.05152762   | 0.076635229 | 0.672375101  | 0.50134493  | 0.65964708  |
| ENSG00000119314 | 590.2381339 | 0.021726751  | 0.084895298 | 0.255924082  | 0.798009459 | 0.879601293 |
| ENSG00000119318 | 1588.610182 | 0.143549242  | 0.065486419 | 2.19204601   | 0.028376185 | 0.077024206 |



|                 |             |              |             |              |             |             |
|-----------------|-------------|--------------|-------------|--------------|-------------|-------------|
| ENSG00000119321 | 392.1778989 | 0.259652141  | 0.097979742 | 2.650059452  | 0.008047761 | 0.026871142 |
| ENSG00000119326 | 297.0830231 | 0.140905478  | 0.112721593 | 1.250030938  | 0.211288246 | 0.366298879 |
| ENSG00000119328 | 52.04853224 | 0.608443272  | 0.246361284 | 2.469719525  | 0.013521902 | 0.041644851 |
| ENSG00000119333 | 336.9317361 | 0.036390145  | 0.122715989 | 0.29653956   | 0.766818061 | 0.859519095 |
| ENSG00000119335 | 1577.176565 | 0.11957221   | 0.065141229 | 1.835584184  | 0.066419178 | 0.152631687 |
| ENSG00000119383 | 613.5523339 | 0.220852766  | 0.094091655 | 2.347208851  | 0.018914649 | 0.055146135 |
| ENSG00000119392 | 273.9561703 | 0.017901416  | 0.125476506 | 0.14266747   | 0.886552809 | 0.938065731 |
| ENSG00000119396 | 298.4033679 | 0.336618329  | 0.11363345  | 2.962317256  | 0.00305333  | 0.011725021 |
| ENSG00000119397 | 329.0137791 | -0.076302285 | 0.118322681 | -0.644866096 | 0.519013964 | 0.673862508 |
| ENSG00000119401 | 78.07100997 | 0.089412475  | 0.202423708 | 0.4417095    | 0.658699434 | 0.781482344 |
| ENSG00000119402 | 635.8794093 | 0.061942103  | 0.082769493 | 0.748368759  | 0.454237761 | 0.61822283  |
| ENSG00000119403 | 537.5680227 | 0.041018297  | 0.090988234 | 0.450808809  | 0.652127352 | 0.776439474 |
| ENSG00000119408 | 308.385983  | -0.331692106 | 0.110219189 | -3.009386206 | 0.002617761 | 0.010280037 |
| ENSG00000119414 | 223.2269089 | -0.143143351 | 0.130947551 | -1.093134999 | 0.274334531 | 0.442634638 |
| ENSG00000119421 | 193.5317179 | 0.165583158  | 0.134716241 | 1.229125433  | 0.219024781 | 0.376163479 |
| ENSG00000119431 | 41.83328793 | 0.211274101  | 0.290969417 | 0.726104149  | 0.467774926 | 0.629756504 |
| ENSG00000119446 | 152.3142389 | 0.340863508  | 0.149454513 | 2.280717394  | 0.022565175 | 0.063619539 |
| ENSG00000119471 | 287.900329  | -0.037167688 | 0.112749635 | -0.329647971 | 0.741665971 | 0.842008184 |
| ENSG00000119487 | 410.703435  | 0.104056786  | 0.100467889 | 1.035721841  | 0.30033193  | 0.470693473 |
| ENSG00000119508 | 35.19008669 | -0.622190871 | 0.302119309 | -2.059421067 | 0.039453919 | 0.100692079 |
| ENSG00000119509 | 339.8459291 | -0.213155026 | 0.112209225 | -1.899621229 | 0.057482844 | 0.135936282 |
| ENSG00000119514 | 65.95240113 | -0.345597022 | 0.222086992 | -1.55613356  | 0.119676336 | 0.241397687 |
| ENSG00000119522 | 249.7630514 | 0.032869144  | 0.118322653 | 0.277792488  | 0.781171658 | 0.868878442 |
| ENSG00000119523 | 154.4736675 | -0.226414582 | 0.156701193 | -1.444881033 | 0.148491305 | 0.282751438 |
| ENSG00000119537 | 194.6937672 | -0.233855771 | 0.135355136 | -1.727719973 | 0.084038441 | 0.183533579 |
| ENSG00000119541 | 383.7709405 | -0.025879025 | 0.099666209 | -0.259656964 | 0.795128392 | 0.87776105  |
| ENSG00000119547 | 7.688563868 | -2.246395093 | 0.736903338 | -3.048425724 | 0.002300438 | 0.009206339 |
| ENSG00000119559 | 101.0567898 | -0.326635278 | 0.17813692  | -1.833619212 | 0.066710538 | 0.153193221 |
| ENSG00000119574 | 151.0718025 | 0.125768519  | 0.171658813 | 0.732665666  | 0.463762369 | 0.62681324  |
| ENSG00000119596 | 1463.527417 | -0.091415687 | 0.067546005 | -1.353384073 | 0.175932963 | 0.320743716 |
| ENSG00000119599 | 55.51668917 | 0.060119782  | 0.23315548  | 0.257852751  | 0.796520551 | 0.878442662 |
| ENSG00000119616 | 131.2566586 | 0.234222996  | 0.164031449 | 1.427915181  | 0.153316273 | 0.28985747  |
| ENSG00000119630 | 70.8028333  | -0.174503281 | 0.212865257 | -0.819782821 | 0.412339926 | 0.580607352 |
| ENSG00000119632 | 117.6548864 | -0.180133088 | 0.166110228 | -1.084419003 | 0.278179062 | 0.446989394 |
| ENSG00000119636 | 11.80857153 | 0.064874904  | 0.522212736 | 0.124230797  | 0.901132539 | 0.946691255 |
| ENSG00000119638 | 570.4516593 | -0.234676178 | 0.098008475 | -2.394447805 | 0.016645412 | 0.04970623  |
| ENSG00000119640 | 53.27817121 | 0.176292605  | 0.248006138 | 0.710839686  | 0.477183585 | 0.637712665 |
| ENSG00000119650 | 48.86562237 | -0.398358432 | 0.248196055 | -1.605015165 | 0.108490467 | 0.223520914 |
| ENSG00000119655 | 421.6826005 | 0.14264477   | 0.103356395 | 1.380125248  | 0.167548085 | 0.309718114 |
| ENSG00000119661 | 68.25618417 | -0.208999786 | 0.224137487 | -0.932462428 | 0.351097595 | 0.522671567 |
| ENSG00000119669 | 436.230247  | -0.833945773 | 0.11515571  | -7.241896835 | 4.42E-13    | 9.14E-12    |
| ENSG00000119673 | 67.6569537  | 0.060719012  | 0.252220411 | 0.240737899  | 0.809758263 | 0.887675536 |
| ENSG00000119681 | 65.67951471 | -0.600206037 | 0.230551012 | -2.603354597 | 0.009231642 | 0.030185491 |
| ENSG00000119682 | 289.1553818 | -0.213674149 | 0.117382227 | -1.820327961 | 0.068709076 | 0.156757575 |
| ENSG00000119684 | 10.32761157 | -1.95373428  | 0.621235552 | -3.144917049 | 0.001661339 | 0.006977344 |
| ENSG00000119685 | 411.4903728 | -0.116587014 | 0.101326768 | -1.150604286 | 0.249895069 | 0.413838003 |
| ENSG00000119686 | 28.55190875 | 0.641780279  | 0.33768467  | 1.900531282  | 0.057363434 | 0.135722445 |
| ENSG00000119688 | 126.1514611 | -0.131162976 | 0.163590065 | -0.80177837  | 0.422681173 | 0.590003496 |
| ENSG00000119689 | 512.4078884 | -0.141923171 | 0.091233015 | -1.555611972 | 0.11980039  | 0.241543861 |
| ENSG00000119699 | 151.4611834 | 0.170003534  | 0.148086742 | 1.147999688  | 0.250968693 | 0.415285337 |

|                 |             |              |             |              |             |             |
|-----------------|-------------|--------------|-------------|--------------|-------------|-------------|
| ENSG00000119703 | 12.58884651 | -0.318414269 | 0.496940748 | -0.640748962 | 0.521685798 | 0.675963509 |
| ENSG00000119705 | 696.4848968 | 0.39275203   | 0.102549202 | 3.829888703  | 0.000128201 | 0.000720337 |
| ENSG00000119707 | 3440.612468 | -0.050168019 | 0.05804222  | -0.864336666 | 0.387402973 | 0.55608518  |
| ENSG00000119711 | 67.35426491 | -1.442524136 | 0.23148737  | -6.231545759 | 4.62E-10    | 6.72E-09    |
| ENSG00000119718 | 183.492903  | 0.105615054  | 0.143845769 | 0.734224266  | 0.462812067 | 0.625890161 |
| ENSG00000119720 | 267.4044497 | -0.092938082 | 0.116306774 | -0.799077118 | 0.424245697 | 0.591443436 |
| ENSG00000119723 | 72.82656138 | -0.507037523 | 0.211162913 | -2.401167494 | 0.016342854 | 0.048969299 |
| ENSG00000119725 | 34.39037875 | -0.104246649 | 0.315964784 | -0.329931229 | 0.741451926 | 0.842008184 |
| ENSG00000119729 | 399.7122951 | 0.070294634  | 0.1022279   | 0.687626703  | 0.491687888 | 0.651295106 |
| ENSG00000119737 | 38.2422855  | -0.566397594 | 0.291634461 | -1.942149059 | 0.052119058 | 0.126009709 |
| ENSG00000119760 | 606.5459218 | -0.17241528  | 0.092228482 | -1.869436387 | 0.061562126 | 0.143743881 |
| ENSG00000119771 | 7.673283079 | -2.643431125 | 0.774217392 | -3.414326716 | 0.000639399 | 0.003011949 |
| ENSG00000119772 | 815.1573502 | -0.689473194 | 0.083619647 | -8.245349249 | 1.65E-16    | 4.41E-15    |
| ENSG00000119777 | 924.7680861 | 0.123799884  | 0.076116534 | 1.626451951  | 0.103853547 | 0.215867235 |
| ENSG00000119778 | 360.179808  | -0.190530669 | 0.10280798  | -1.853267303 | 0.063844055 | 0.14796526  |
| ENSG00000119782 | 12.0814526  | -0.453105446 | 0.505718506 | -0.895963745 | 0.370272127 | 0.541510939 |
| ENSG00000119787 | 462.4457068 | -0.204344976 | 0.09307709  | -2.195437947 | 0.028132198 | 0.07646536  |
| ENSG00000119801 | 100.3340785 | -8.72E-05    | 0.18903769  | -0.000461225 | 0.999631996 | 0.999854605 |
| ENSG00000119812 | 585.2184421 | 0.666589214  | 0.086845846 | 7.675545176  | 1.65E-14    | 3.83E-13    |
| ENSG00000119820 | 376.4981269 | -0.125265706 | 0.106042899 | -1.181273871 | 0.237493944 | 0.398813799 |
| ENSG00000119844 | 181.3617331 | 0.376922558  | 0.135580987 | 2.780054685  | 0.005434975 | 0.019182183 |
| ENSG00000119862 | 153.483406  | 0.308383237  | 0.155332479 | 1.985310726  | 0.047109911 | 0.116341935 |
| ENSG00000119865 | 209.0331832 | 0.324897286  | 0.130075952 | 2.497750595  | 0.012498409 | 0.038988486 |
| ENSG00000119878 | 72.82061891 | -0.073324067 | 0.211465048 | -0.346743197 | 0.728784255 | 0.832566072 |
| ENSG00000119888 | 10.18190308 | -0.846796701 | 0.551311661 | -1.535967332 | 0.124546393 | 0.248799261 |
| ENSG00000119899 | 136.7231716 | 0.663014439  | 0.164330249 | 4.034646356  | 5.47E-05    | 0.000332678 |
| ENSG00000119900 | 82.75588554 | -0.398404202 | 0.200672631 | -1.985343985 | 0.047106214 | 0.116341935 |
| ENSG00000119906 | 534.2917076 | -0.110238894 | 0.089678315 | -1.229270357 | 0.218970458 | 0.376116167 |
| ENSG00000119912 | 329.2171915 | -0.047703271 | 0.10722353  | -0.444895549 | 0.65639524  | 0.779657734 |
| ENSG00000119915 | 17.61198009 | -1.141184645 | 0.46375261  | -2.460761663 | 0.013864243 | 0.042522058 |
| ENSG00000119917 | 55.69136048 | 1.062281443  | 0.243305065 | 4.366047388  | 1.27E-05    | 8.85E-05    |
| ENSG00000119919 | 11.0888692  | 6.087390051  | 1.25444579  | 4.852652941  | 1.22E-06    | 1.06E-05    |
| ENSG00000119922 | 49.41378229 | -0.194479172 | 0.250320017 | -0.776922174 | 0.437204688 | 0.603138409 |
| ENSG00000119927 | 76.92284313 | -0.223632622 | 0.206529998 | -1.082809391 | 0.278893036 | 0.447675749 |
| ENSG00000119929 | 162.5313306 | 0.08752533   | 0.145224753 | 0.602688785  | 0.546715744 | 0.695122742 |
| ENSG00000119938 | 7.988036678 | -1.052492677 | 0.626907753 | -1.678863711 | 0.093178608 | 0.198616071 |
| ENSG00000119946 | 479.0574235 | -0.188437927 | 0.093256645 | -2.020638073 | 0.043317245 | 0.10908362  |
| ENSG00000119950 | 183.006034  | 0.452713053  | 0.135988079 | 3.329064258  | 0.000871383 | 0.00397155  |
| ENSG00000119953 | 547.4740035 | 0.150696397  | 0.087371582 | 1.724775886  | 0.084567869 | 0.184403114 |
| ENSG00000119965 | 68.82903126 | 0.233799735  | 0.228414071 | 1.023578512  | 0.306034399 | 0.477121554 |
| ENSG00000119969 | 891.6983578 | -0.2913424   | 0.085583102 | -3.404204722 | 0.00066357  | 0.00311849  |
| ENSG00000119977 | 248.6734116 | 0.276649481  | 0.122625055 | 2.256059998  | 0.024066874 | 0.067156809 |
| ENSG00000119979 | 110.452966  | 0.584608989  | 0.172003061 | 3.398828995  | 0.00067675  | 0.003173    |
| ENSG00000119986 | 59.46105498 | -0.204613635 | 0.231305266 | -0.884604307 | 0.376370083 | 0.546164313 |
| ENSG00000120008 | 371.9885926 | -0.287396642 | 0.11406557  | -2.519573979 | 0.011749695 | 0.036990298 |
| ENSG00000120029 | 135.1539888 | -0.220605867 | 0.155033811 | -1.422953257 | 0.154749706 | 0.292054868 |
| ENSG00000120049 | 31.51280053 | 0.077790706  | 0.30845141  | 0.252197602  | 0.800888331 | 0.881184177 |
| ENSG00000120053 | 335.5944531 | -0.186602147 | 0.104401428 | -1.787352436 | 0.073880544 | 0.165465562 |
| ENSG00000120063 | 431.8802226 | -0.127931431 | 0.10633022  | -1.203152132 | 0.228917455 | 0.387795886 |
| ENSG00000120068 | 278.83639   | -0.162798223 | 0.117717755 | -1.382953853 | 0.166679016 | 0.308528087 |

|                 |             |              |             |              |             |             |
|-----------------|-------------|--------------|-------------|--------------|-------------|-------------|
| ENSG00000120071 | 733.9035335 | -0.181569704 | 0.0823923   | -2.203721754 | 0.027543918 | 0.075128043 |
| ENSG00000120075 | 400.3803097 | -0.160258905 | 0.098273879 | -1.630737557 | 0.102945708 | 0.214551686 |
| ENSG00000120093 | 672.9671661 | -0.345576679 | 0.092610422 | -3.731509618 | 0.000190336 | 0.001023993 |
| ENSG00000120129 | 69.51105185 | 0.411661535  | 0.2102834   | 1.957651129  | 0.050270963 | 0.122342078 |
| ENSG00000120137 | 896.4707717 | 0.027688414  | 0.075577446 | 0.366358153  | 0.714097841 | 0.821736084 |
| ENSG00000120156 | 40.76395007 | -6.823967058 | 1.021652816 | -6.679340525 | 2.40E-11    | 4.07E-10    |
| ENSG00000120158 | 135.0767229 | -0.197124199 | 0.156643548 | -1.258425271 | 0.208237997 | 0.362603093 |
| ENSG00000120159 | 364.8614734 | 0.048750889  | 0.108584624 | 0.448966779  | 0.653455622 | 0.777559757 |
| ENSG00000120162 | 15.08638368 | -0.296646637 | 0.449789532 | -0.659523213 | 0.509559845 | 0.665943644 |
| ENSG00000120253 | 367.6745477 | 0.146017789  | 0.108878742 | 1.341104671  | 0.179886471 | 0.325920967 |
| ENSG00000120254 | 699.252567  | -0.135137042 | 0.089648521 | -1.507409599 | 0.1317057   | 0.25929502  |
| ENSG00000120256 | 35.75648848 | -0.416933586 | 0.295851879 | -1.409264621 | 0.158756936 | 0.297222269 |
| ENSG00000120265 | 241.0341246 | 0.235686673  | 0.122647328 | 1.921661704  | 0.054648339 | 0.130796595 |
| ENSG00000120278 | 7.071418502 | -1.333728182 | 0.683722464 | -1.950686502 | 0.05109435  | 0.123851999 |
| ENSG00000120306 | 184.3751927 | 0.187485105  | 0.142907868 | 1.311929896  | 0.189543789 | 0.338829423 |
| ENSG00000120314 | 571.0721438 | 0.15579117   | 0.084739203 | 1.838478102  | 0.065991986 | 0.151940244 |
| ENSG00000120327 | 10.58978952 | -0.405758072 | 0.541392481 | -0.749471199 | 0.453573251 | 0.617557765 |
| ENSG00000120333 | 156.7713355 | 0.181540846  | 0.150316175 | 1.20772662   | 0.227152435 | 0.385691383 |
| ENSG00000120334 | 216.2689    | -0.147183183 | 0.132296067 | -1.112528789 | 0.265910859 | 0.432748217 |
| ENSG00000120370 | 121.3745651 | -0.509269694 | 0.170498796 | -2.986940125 | 0.002817849 | 0.010943413 |
| ENSG00000120437 | 542.7014145 | 0.211514759  | 0.092936479 | 2.275906734  | 0.022851592 | 0.064276395 |
| ENSG00000120438 | 1459.823135 | 0.38316761   | 0.071085107 | 5.390265669  | 7.04E-08    | 7.56E-07    |
| ENSG00000120458 | 97.43774808 | -0.17996337  | 0.180817318 | -0.99527729  | 0.31960142  | 0.491293625 |
| ENSG00000120498 | 23.71219901 | -4.34081551  | 0.653937353 | -6.637968436 | 3.18E-11    | 5.34E-10    |
| ENSG00000120509 | 122.6907201 | -0.062943324 | 0.16467139  | -0.382235941 | 0.702286365 | 0.813676721 |
| ENSG00000120519 | 60.70478664 | -0.112601993 | 0.228202186 | -0.493430825 | 0.621708206 | 0.754639706 |
| ENSG00000120526 | 310.9822628 | -0.498022808 | 0.115603706 | -4.308017674 | 1.65E-05    | 0.000112598 |
| ENSG00000120533 | 308.1178985 | 0.151526496  | 0.110645482 | 1.369477483  | 0.170850069 | 0.313921637 |
| ENSG00000120539 | 255.4178137 | 0.07879391   | 0.118774493 | 0.663390831  | 0.507080277 | 0.664207073 |
| ENSG00000120549 | 73.19163625 | 0.972882645  | 0.226668119 | 4.292101819  | 1.77E-05    | 0.000120218 |
| ENSG00000120616 | 338.4472706 | 0.003966084  | 0.109292635 | 0.036288667  | 0.971052186 | 0.984973605 |
| ENSG00000120647 | 45.66251204 | -0.599409728 | 0.275796672 | -2.173375495 | 0.029752068 | 0.07995548  |
| ENSG00000120656 | 247.2292428 | -0.401197653 | 0.122223602 | -3.282489184 | 0.001028949 | 0.004611886 |
| ENSG00000120662 | 52.65231412 | 0.403916939  | 0.246549043 | 1.638282327  | 0.101362813 | 0.211912997 |
| ENSG00000120675 | 157.5642724 | 0.074149518  | 0.143720047 | 0.515930239  | 0.605903134 | 0.742940059 |
| ENSG00000120685 | 943.9541141 | -0.076894388 | 0.076384917 | -1.006669784 | 0.314093487 | 0.485376371 |
| ENSG00000120686 | 281.1628926 | -0.018872324 | 0.118810546 | -0.158843845 | 0.873791904 | 0.930071597 |
| ENSG00000120688 | 159.1067433 | 0.121223912  | 0.142254749 | 0.852160742  | 0.394124883 | 0.562172241 |
| ENSG00000120690 | 272.4139402 | -0.000306197 | 0.123418115 | -0.00248097  | 0.998020474 | 0.999084016 |
| ENSG00000120693 | 282.3115388 | 0.670029953  | 0.122079442 | 5.488474906  | 4.05E-08    | 4.56E-07    |
| ENSG00000120694 | 1136.453225 | 0.134759522  | 0.074738762 | 1.803074043  | 0.071376587 | 0.16145361  |
| ENSG00000120696 | 118.3247042 | 0.034903017  | 0.165944016 | 0.210330071  | 0.833410067 | 0.902386945 |
| ENSG00000120697 | 208.1696666 | -0.090916707 | 0.128613725 | -0.706897393 | 0.479630244 | 0.640312302 |
| ENSG00000120699 | 239.5838869 | -0.074908762 | 0.122001285 | -0.613999777 | 0.539215475 | 0.689580557 |
| ENSG00000120705 | 782.6254147 | 0.000193171  | 0.079784545 | 0.002421161  | 0.998068195 | 0.999084016 |
| ENSG00000120709 | 446.1147872 | -0.235435566 | 0.096930537 | -2.428910145 | 0.015144285 | 0.045906727 |
| ENSG00000120725 | 256.9258926 | 0.281837786  | 0.118273277 | 2.382937154  | 0.017175126 | 0.051060105 |
| ENSG00000120727 | 506.5262525 | 0.288003921  | 0.091929934 | 3.132863352  | 0.0017311   | 0.007233612 |
| ENSG00000120733 | 1035.333704 | -0.121209278 | 0.071795248 | -1.688263236 | 0.091360709 | 0.195721196 |
| ENSG00000120738 | 11013.63782 | 0.381940339  | 0.056836656 | 6.719964985  | 1.82E-11    | 3.12E-10    |

|                 |             |              |             |              |             |             |
|-----------------|-------------|--------------|-------------|--------------|-------------|-------------|
| ENSG00000120742 | 429.790525  | 0.078264893  | 0.101503252 | 0.771057983  | 0.440672564 | 0.60586547  |
| ENSG00000120756 | 112.7270545 | -0.125857876 | 0.171272653 | -0.734839296 | 0.462437372 | 0.625443652 |
| ENSG00000120784 | 125.0448561 | -0.208222026 | 0.162012315 | -1.28522345  | 0.198714211 | 0.350564914 |
| ENSG00000120798 | 152.4717668 | -0.376866018 | 0.147173733 | -2.560688041 | 0.010446511 | 0.033462203 |
| ENSG00000120800 | 342.6353719 | 0.226560308  | 0.109858865 | 2.062285163  | 0.039180595 | 0.100105442 |
| ENSG00000120802 | 1917.80397  | 0.215449218  | 0.081121815 | 2.655872731  | 0.007910346 | 0.02649419  |
| ENSG00000120805 | 525.089357  | 0.157838534  | 0.090819811 | 1.737930665  | 0.082223032 | 0.180438514 |
| ENSG00000120820 | 258.7679388 | -0.152623056 | 0.119412369 | -1.278117654 | 0.201207945 | 0.353605406 |
| ENSG00000120832 | 46.6299562  | -0.727488388 | 0.259386677 | -2.804648243 | 0.005037152 | 0.01801346  |
| ENSG00000120833 | 118.2295235 | -1.787787426 | 0.182629568 | -9.789145558 | 1.25E-22    | 4.84E-21    |
| ENSG00000120837 | 253.7486207 | -0.087996051 | 0.12118489  | -0.72613055  | 0.467758742 | 0.629756504 |
| ENSG00000120860 | 39.46764168 | 0.176359917  | 0.276796274 | 0.637147004  | 0.524029094 | 0.677437574 |
| ENSG00000120868 | 44.25141339 | -1.411504959 | 0.286802907 | -4.921515523 | 8.59E-07    | 7.70E-06    |
| ENSG00000120885 | 825.5162125 | -0.016662781 | 0.076297922 | -0.218391024 | 0.827124459 | 0.898668717 |
| ENSG00000120889 | 916.0840995 | 0.036481401  | 0.077220683 | 0.472430437  | 0.636619584 | 0.765502079 |
| ENSG00000120896 | 496.0187538 | 0.079181531  | 0.105511042 | 0.750457299  | 0.452979332 | 0.617396281 |
| ENSG00000120899 | 26.60478493 | -0.483174045 | 0.350421099 | -1.378838334 | 0.167944605 | 0.310165377 |
| ENSG00000120910 | 70.2533804  | 0.288211006  | 0.209354327 | 1.376666105  | 0.168615503 | 0.311077222 |
| ENSG00000120913 | 70.90592625 | 0.823064747  | 0.21397409  | 3.846562679  | 0.000119786 | 0.000678758 |
| ENSG00000120925 | 154.5229433 | -0.225585344 | 0.148086528 | -1.523334682 | 0.127674994 | 0.25299064  |
| ENSG00000120942 | 153.828573  | -0.098314586 | 0.14684488  | -0.669513199 | 0.503168164 | 0.660933822 |
| ENSG00000120948 | 572.4299303 | 0.136630287  | 0.090412869 | 1.51118186   | 0.130742123 | 0.257830759 |
| ENSG00000120963 | 472.2990355 | 0.242776151  | 0.093314468 | 2.601698934  | 0.009276325 | 0.030310429 |
| ENSG00000120992 | 407.8305645 | -0.232651599 | 0.098234034 | -2.368340067 | 0.017868104 | 0.052666568 |
| ENSG00000121005 | 17.30165192 | -2.706711357 | 0.532896555 | -5.079243492 | 3.79E-07    | 3.66E-06    |
| ENSG00000121022 | 216.2921896 | 0.183659201  | 0.126932081 | 1.446909243  | 0.147922344 | 0.282050382 |
| ENSG00000121039 | 1031.504009 | -3.950921032 | 0.104934868 | -37.65117453 | 0           | 0           |
| ENSG00000121057 | 487.2076213 | -0.177247623 | 0.096567028 | -1.835488026 | 0.066433412 | 0.152631687 |
| ENSG00000121058 | 401.391119  | 0.17018343   | 0.10094384  | 1.685921891  | 0.091810845 | 0.196356111 |
| ENSG00000121060 | 1305.842103 | 0.202347858  | 0.07028699  | 2.878880696  | 0.003990893 | 0.014779876 |
| ENSG00000121064 | 247.9250423 | 0.750047028  | 0.12703858  | 5.904088585  | 3.55E-09    | 4.58E-08    |
| ENSG00000121067 | 413.517611  | -0.074792302 | 0.099548811 | -0.751312861 | 0.452464391 | 0.61715847  |
| ENSG00000121068 | 6035.27733  | 0.082072531  | 0.054761128 | 1.498737046  | 0.133941862 | 0.262446831 |
| ENSG00000121073 | 300.3199424 | 0.439348939  | 0.129919609 | 3.381698445  | 0.000720392 | 0.00335522  |
| ENSG00000121075 | 13.73022156 | -1.871422508 | 0.527560751 | -3.54731186  | 0.000389184 | 0.001937916 |
| ENSG00000121104 | 303.7433609 | 0.34356992   | 0.114707106 | 2.995192982  | 0.002742713 | 0.010687069 |
| ENSG00000121152 | 473.3766238 | -0.078934413 | 0.092308618 | -0.855114235 | 0.39248791  | 0.560718408 |
| ENSG00000121207 | 24.74616336 | -1.342110422 | 0.397502026 | -3.376361208 | 0.000734514 | 0.00340969  |
| ENSG00000121210 | 184.2436348 | 0.18032514   | 0.132977647 | 1.356056035  | 0.17508134  | 0.319564395 |
| ENSG00000121211 | 15.20058879 | -0.075826831 | 0.475201193 | -0.159567846 | 0.87322151  | 0.929849389 |
| ENSG00000121236 | 50.55215177 | -4.068116781 | 0.413565178 | -9.83670048  | 7.82E-23    | 3.05E-21    |
| ENSG00000121274 | 474.4374826 | -0.812125952 | 0.092999104 | -8.732621203 | 2.49E-18    | 7.68E-17    |
| ENSG00000121281 | 258.4487354 | 0.129581859  | 0.116162215 | 1.11552504   | 0.264625494 | 0.431329115 |
| ENSG00000121289 | 94.88658841 | -0.29580185  | 0.186367206 | -1.587199035 | 0.112467573 | 0.229860614 |
| ENSG00000121310 | 251.1898728 | -0.128663983 | 0.124277272 | -1.035297774 | 0.300529869 | 0.4708514   |
| ENSG00000121316 | 178.7195065 | 0.105250854  | 0.143521716 | 0.733344451  | 0.46334837  | 0.62643451  |
| ENSG00000121350 | 86.67789518 | -0.112062549 | 0.207856354 | -0.539134585 | 0.589793993 | 0.731165495 |
| ENSG00000121390 | 695.0244277 | -0.329888837 | 0.081607239 | -4.042396738 | 5.29E-05    | 0.000323128 |
| ENSG00000121406 | 47.02277105 | 0.252365626  | 0.258489775 | 0.976307964  | 0.328911875 | 0.501326509 |
| ENSG00000121413 | 32.97275479 | -0.835025408 | 0.313788453 | -2.661109423 | 0.007788364 | 0.026147981 |

|                 |             |              |             |              |             |             |
|-----------------|-------------|--------------|-------------|--------------|-------------|-------------|
| ENSG00000121417 | 60.39996158 | 0.124267905  | 0.237290381 | 0.523695499  | 0.600490347 | 0.738900556 |
| ENSG00000121481 | 352.4728908 | -0.096582233 | 0.103772259 | -0.930713403 | 0.352001835 | 0.523622765 |
| ENSG00000121486 | 230.2880446 | 0.057473668  | 0.125453623 | 0.458126806  | 0.646861342 | 0.772538913 |
| ENSG00000121542 | 21.41897662 | -0.501879815 | 0.379256888 | -1.323324193 | 0.18572759  | 0.333706249 |
| ENSG00000121552 | 12.42156079 | 1.973379342  | 0.537662488 | 3.670293883  | 0.000242272 | 0.001269374 |
| ENSG00000121578 | 100.7749555 | -0.772081315 | 0.182585613 | -4.228598852 | 2.35E-05    | 0.000155663 |
| ENSG00000121579 | 852.8056484 | -0.041389988 | 0.083990431 | -0.492794091 | 0.622158087 | 0.754883986 |
| ENSG00000121621 | 158.0899636 | -0.175222347 | 0.145425822 | -1.204891571 | 0.228245163 | 0.38696065  |
| ENSG00000121644 | 422.5074239 | -0.176632678 | 0.099062238 | -1.783047512 | 0.07457857  | 0.166666196 |
| ENSG00000121653 | 80.70338063 | -1.35771325  | 0.209661514 | -6.475739024 | 9.43E-11    | 1.50E-09    |
| ENSG00000121671 | 93.96583204 | 0.173863933  | 0.184368986 | 0.943021583  | 0.345669864 | 0.517436549 |
| ENSG00000121680 | 97.26022464 | 0.415729677  | 0.190214108 | 2.185588029  | 0.028845759 | 0.078012395 |
| ENSG00000121690 | 33.15228312 | 0.570183185  | 0.304406208 | 1.873099725  | 0.061054615 | 0.142843801 |
| ENSG00000121691 | 197.5407802 | 0.145986639  | 0.138661457 | 1.052827815  | 0.292419914 | 0.462987211 |
| ENSG00000121716 | 32.19311311 | 0.145269588  | 0.311376183 | 0.46654046   | 0.640828694 | 0.768195995 |
| ENSG00000121741 | 1029.262352 | -0.079472273 | 0.070874613 | -1.12130803  | 0.262156769 | 0.428498502 |
| ENSG00000121743 | 67.99991447 | 0.212100342  | 0.214162131 | 0.990372768  | 0.321991951 | 0.493846379 |
| ENSG00000121749 | 201.4872651 | -0.243130827 | 0.130202913 | -1.867322485 | 0.061856567 | 0.144351407 |
| ENSG00000121753 | 186.6971847 | -0.057004227 | 0.137347007 | -0.415038001 | 0.678114085 | 0.795757928 |
| ENSG00000121766 | 139.8932388 | -0.169873156 | 0.155327918 | -1.093642138 | 0.274111961 | 0.442344827 |
| ENSG00000121769 | 125.5676017 | -0.535941884 | 0.165108186 | -3.246004321 | 0.001170371 | 0.005145601 |
| ENSG00000121774 | 1588.027668 | 0.054169406  | 0.066126735 | 0.819175563  | 0.412686255 | 0.581036767 |
| ENSG00000121775 | 225.7741236 | 0.264800518  | 0.122651911 | 2.158959572  | 0.030853304 | 0.082410412 |
| ENSG00000121851 | 34.21548549 | -0.79060005  | 0.303271465 | -2.6069055   | 0.009136457 | 0.0299021   |
| ENSG00000121858 | 98.20910019 | -3.38867035  | 0.26344751  | -12.86279132 | 7.29E-38    | 5.31E-36    |
| ENSG00000121864 | 218.7980191 | 0.028458225  | 0.129449246 | 0.219840793  | 0.825995148 | 0.898324082 |
| ENSG00000121871 | 69.48584797 | -5.768765476 | 0.573202332 | -10.0640998  | 7.96E-24    | 3.29E-22    |
| ENSG00000121879 | 200.1261851 | -0.350646428 | 0.129420026 | -2.70936763  | 0.00674116  | 0.023050894 |
| ENSG00000121892 | 1162.390982 | 0.089392765  | 0.069123707 | 1.293228746  | 0.195931956 | 0.347068876 |
| ENSG00000121895 | 6.635454998 | -3.39909632  | 0.985536006 | -3.448982382 | 0.000562703 | 0.002687622 |
| ENSG00000121897 | 87.71560325 | -0.004600323 | 0.188045762 | -0.024463849 | 0.980482619 | 0.990139421 |
| ENSG00000121900 | 37.66197364 | -0.673063075 | 0.324069519 | -2.07690954  | 0.037809909 | 0.097291774 |
| ENSG00000121903 | 100.9833774 | -0.100054311 | 0.179566424 | -0.55719944  | 0.577391172 | 0.721135751 |
| ENSG00000121931 | 255.1059444 | -0.301930139 | 0.127430827 | -2.369364971 | 0.01781866  | 0.05256168  |
| ENSG00000121940 | 437.681548  | 0.113446859  | 0.097308392 | 1.165848675  | 0.243675633 | 0.406763116 |
| ENSG00000121957 | 217.4635894 | -0.188490727 | 0.128905871 | -1.462235398 | 0.143676714 | 0.276053455 |
| ENSG00000121964 | 160.1432572 | 0.318815942  | 0.14646227  | 2.176778644  | 0.029497087 | 0.079391758 |
| ENSG00000121988 | 116.8600233 | -0.57912644  | 0.166545855 | -3.477279211 | 0.00050653  | 0.002450147 |
| ENSG00000121989 | 45.31163084 | -0.174048206 | 0.26483862  | -0.657185899 | 0.511061392 | 0.667402909 |
| ENSG00000122008 | 287.9571374 | 0.140072077  | 0.115164595 | 1.216277247  | 0.223879326 | 0.382164648 |
| ENSG00000122026 | 184.7316482 | 0.415213407  | 0.138399365 | 3.000110648  | 0.002698815 | 0.010536482 |
| ENSG00000122033 | 267.8105597 | 0.337816094  | 0.122849416 | 2.749838836  | 0.005962458 | 0.020731349 |
| ENSG00000122034 | 923.86842   | 0.310785964  | 0.074334026 | 4.180938108  | 2.90E-05    | 0.000188185 |
| ENSG00000122035 | 18.1140042  | 0.150751848  | 0.414358626 | 0.36381974   | 0.715992621 | 0.823285398 |
| ENSG00000122042 | 218.041223  | -0.070439568 | 0.133753968 | -0.526635354 | 0.598446836 | 0.737337313 |
| ENSG00000122068 | 661.554975  | 0.11125736   | 0.086021482 | 1.293367158  | 0.195884103 | 0.347068876 |
| ENSG00000122085 | 173.8846175 | 0.031886008  | 0.14373981  | 0.221831432  | 0.82444511  | 0.89742775  |
| ENSG00000122126 | 337.3230846 | 0.079265109  | 0.104203432 | 0.760676565  | 0.446850276 | 0.611843827 |
| ENSG00000122140 | 675.8832139 | 0.12936445   | 0.086999377 | 1.486958351  | 0.137025811 | 0.266735479 |
| ENSG00000122203 | 800.4424705 | -0.065575958 | 0.086466203 | -0.758399879 | 0.44821163  | 0.61328938  |

|                 |             |              |             |              |             |             |
|-----------------|-------------|--------------|-------------|--------------|-------------|-------------|
| ENSG00000122218 | 1557.815563 | 0.048110781  | 0.064216793 | 0.749193153  | 0.453740795 | 0.617606294 |
| ENSG00000122257 | 1219.935559 | -0.01817056  | 0.069885266 | -0.260005593 | 0.794859459 | 0.87776105  |
| ENSG00000122299 | 228.1658417 | -0.114811158 | 0.12391945  | -0.926498284 | 0.354187088 | 0.525593284 |
| ENSG00000122335 | 40.34337085 | 0.161815376  | 0.289989702 | 0.558003871  | 0.576841741 | 0.720834083 |
| ENSG00000122359 | 579.3942147 | 0.380944411  | 0.085597437 | 4.450418417  | 8.57E-06    | 6.24E-05    |
| ENSG00000122367 | 44.39031745 | 1.851191668  | 0.283071535 | 6.539660265  | 6.17E-11    | 1.01E-09    |
| ENSG00000122376 | 176.0057409 | 0.044340906  | 0.136847667 | 0.324016528  | 0.745925521 | 0.845069425 |
| ENSG00000122378 | 491.1457786 | 0.35769449   | 0.099297297 | 3.602258088  | 0.000315465 | 0.001607304 |
| ENSG00000122386 | 66.67893448 | -0.001642209 | 0.221548277 | -0.00741242  | 0.994085799 | 0.997280618 |
| ENSG00000122390 | 257.1283027 | -0.065193412 | 0.122671142 | -0.531448641 | 0.595107922 | 0.734903558 |
| ENSG00000122406 | 6509.704072 | 0.169734605  | 0.060416668 | 2.809400308  | 0.004963389 | 0.017799521 |
| ENSG00000122417 | 167.4743855 | -0.580576765 | 0.143161991 | -4.055383422 | 5.01E-05    | 0.000308369 |
| ENSG00000122435 | 78.62498576 | -0.024113696 | 0.203587861 | -0.11844368  | 0.905716118 | 0.949518196 |
| ENSG00000122481 | 16.09832244 | -0.171632929 | 0.445975355 | -0.384848461 | 0.700349692 | 0.811968647 |
| ENSG00000122482 | 663.704932  | -0.209660853 | 0.091617456 | -2.288437835 | 0.022112036 | 0.062572074 |
| ENSG00000122483 | 258.712908  | -0.547556718 | 0.124820642 | -4.386748126 | 1.15E-05    | 8.14E-05    |
| ENSG00000122484 | 270.1419551 | -0.440144313 | 0.114720395 | -3.836670148 | 0.000124714 | 0.000704122 |
| ENSG00000122490 | 101.9201718 | 0.244722991  | 0.176968257 | 1.382863771  | 0.166706641 | 0.308528087 |
| ENSG00000122507 | 34.94681133 | -0.036728791 | 0.318937727 | -0.115159756 | 0.908318496 | 0.950898041 |
| ENSG00000122512 | 140.3695934 | -0.169954051 | 0.151236706 | -1.123761918 | 0.261114041 | 0.427285413 |
| ENSG00000122515 | 526.0005866 | 0.218623514  | 0.101984409 | 2.143695456  | 0.032057297 | 0.08492182  |
| ENSG00000122545 | 645.8460783 | 0.10240833   | 0.083738953 | 1.222947352  | 0.221349582 | 0.379136396 |
| ENSG00000122547 | 127.3121912 | 0.504066079  | 0.162296309 | 3.105838223  | 0.001897405 | 0.007829861 |
| ENSG00000122550 | 38.28008388 | -0.550329076 | 0.292365277 | -1.882333914 | 0.059790693 | 0.14040118  |
| ENSG00000122557 | 190.7581684 | -0.440271164 | 0.13977595  | -3.14983488  | 0.001633628 | 0.006876706 |
| ENSG00000122565 | 950.3903132 | 0.135092185  | 0.07628327  | 1.770928065  | 0.076572665 | 0.170408146 |
| ENSG00000122566 | 14367.29351 | 0.188546721  | 0.047411556 | 3.97680943   | 6.98E-05    | 0.000416792 |
| ENSG00000122574 | 130.1050559 | 1.492474806  | 0.174353154 | 8.56006773   | 1.13E-17    | 3.26E-16    |
| ENSG00000122591 | 267.7583353 | -0.408795441 | 0.125686582 | -3.252498666 | 0.001143951 | 0.005054761 |
| ENSG00000122642 | 296.5512008 | -0.980022075 | 0.117058134 | -8.372097188 | 5.66E-17    | 1.57E-15    |
| ENSG00000122643 | 106.9715225 | 0.128880884  | 0.18450189  | 0.698534224  | 0.484843162 | 0.645370217 |
| ENSG00000122644 | 64.69358999 | 0.175830031  | 0.21624338  | 0.813111742  | 0.416153995 | 0.583987529 |
| ENSG00000122674 | 28.26287301 | -0.313721081 | 0.337966743 | -0.928260215 | 0.353272606 | 0.52460864  |
| ENSG00000122678 | 183.0244924 | 0.112355824  | 0.144792467 | 0.775978386  | 0.437761748 | 0.603314879 |
| ENSG00000122691 | 932.8784162 | -0.513685258 | 0.07950767  | -6.460826473 | 1.04E-10    | 1.64E-09    |
| ENSG00000122692 | 399.4093656 | -0.129893078 | 0.099472819 | -1.305814779 | 0.191615553 | 0.34183689  |
| ENSG00000122694 | 36.33138211 | 0.528434922  | 0.290526656 | 1.81888619   | 0.068928795 | 0.157182271 |
| ENSG00000122696 | 68.94791195 | 0.01928539   | 0.213778102 | 0.090212188  | 0.928118599 | 0.960813764 |
| ENSG00000122705 | 764.3444647 | 0.169073769  | 0.081225678 | 2.081531046  | 0.037385325 | 0.096446587 |
| ENSG00000122707 | 44.59487813 | -0.268133165 | 0.276413645 | -0.970043158 | 0.33202498  | 0.504440134 |
| ENSG00000122729 | 549.0148068 | 0.395258924  | 0.092854967 | 4.256734328  | 2.07E-05    | 0.000139085 |
| ENSG00000122741 | 271.0293116 | -0.177982652 | 0.120666271 | -1.474999195 | 0.14021276  | 0.271215731 |
| ENSG00000122756 | 11.63660131 | -3.503287538 | 0.766850574 | -4.568409619 | 4.91E-06    | 3.77E-05    |
| ENSG00000122778 | 605.4655522 | 0.480626022  | 0.092105557 | 5.218208729  | 1.81E-07    | 1.83E-06    |
| ENSG00000122779 | 799.8916705 | 0.489667715  | 0.080684963 | 6.068884389  | 1.29E-09    | 1.77E-08    |
| ENSG00000122783 | 239.507409  | 0.46728578   | 0.120265135 | 3.885463393  | 0.000102135 | 0.000586785 |
| ENSG00000122786 | 2107.225902 | -0.707753564 | 0.066222162 | -10.68756359 | 1.16E-26    | 5.56E-25    |
| ENSG00000122862 | 16.14077967 | 2.868107415  | 0.53854788  | 5.325631241  | 1.01E-07    | 1.06E-06    |
| ENSG00000122863 | 287.4502402 | 0.555568824  | 0.115267118 | 4.819837884  | 1.44E-06    | 1.23E-05    |
| ENSG00000122870 | 90.31934501 | -7.969495544 | 1.007510081 | -7.910090125 | 2.57E-15    | 6.36E-14    |

|                 |             |              |             |              |             |             |
|-----------------|-------------|--------------|-------------|--------------|-------------|-------------|
| ENSG00000122873 | 291.1118287 | 0.277252135  | 0.110157092 | 2.516879588  | 0.011839929 | 0.037219882 |
| ENSG00000122877 | 77.39247445 | -1.807261251 | 0.231598737 | -7.803415828 | 6.03E-15    | 1.44E-13    |
| ENSG00000122882 | 238.778172  | 0.042690181  | 0.121939613 | 0.350092799  | 0.726269055 | 0.830706084 |
| ENSG00000122884 | 640.9573766 | 0.485171529  | 0.084590065 | 5.735561604  | 9.72E-09    | 1.19E-07    |
| ENSG00000122912 | 68.39509277 | -0.271638462 | 0.217382801 | -1.249585802 | 0.211450892 | 0.366375183 |
| ENSG00000122952 | 628.4286978 | 0.112617231  | 0.083005871 | 1.356738134  | 0.174864431 | 0.31933446  |
| ENSG00000122958 | 281.9420947 | 0.400027267  | 0.118396541 | 3.378707378  | 0.000728275 | 0.003384081 |
| ENSG00000122965 | 532.8438961 | 0.54355379   | 0.091033699 | 5.970907406  | 2.36E-09    | 3.14E-08    |
| ENSG00000122966 | 978.2513486 | -0.549113543 | 0.076193488 | -7.206830407 | 5.73E-13    | 1.16E-11    |
| ENSG00000122970 | 161.9331493 | -1.182564793 | 0.149865302 | -7.890851148 | 3.00E-15    | 7.40E-14    |
| ENSG00000122971 | 48.44362207 | -0.122196783 | 0.24996638  | -0.488852876 | 0.62494586  | 0.756516245 |
| ENSG00000123009 | 9.050631355 | 0.356572805  | 0.576833821 | 0.618155163  | 0.536473063 | 0.687200175 |
| ENSG00000123064 | 953.370701  | 0.349787132  | 0.07773765  | 4.49958458   | 6.81E-06    | 5.06E-05    |
| ENSG00000123066 | 995.2346905 | -0.477013939 | 0.073660027 | -6.475886015 | 9.43E-11    | 1.50E-09    |
| ENSG00000123080 | 206.0767386 | 0.335076188  | 0.145689882 | 2.299927652  | 0.021452319 | 0.061161098 |
| ENSG00000123091 | 236.7863463 | 0.41970215   | 0.131962747 | 3.180459329  | 0.001470418 | 0.006287659 |
| ENSG00000123094 | 244.1022275 | -0.40043403  | 0.119233408 | -3.358404647 | 0.000783938 | 0.003612852 |
| ENSG00000123095 | 14.65981927 | 0.103638679  | 0.448419342 | 0.231120001  | 0.817221577 | 0.892507031 |
| ENSG00000123104 | 471.1529118 | -0.70809162  | 0.100715603 | -7.030604948 | 2.06E-12    | 3.97E-11    |
| ENSG00000123106 | 105.3757126 | 0.242997239  | 0.185942142 | 1.306843282  | 0.191265942 | 0.341430003 |
| ENSG00000123124 | 123.159326  | -0.438871138 | 0.16404938  | -2.675238022 | 0.007467621 | 0.025215787 |
| ENSG00000123130 | 194.1466652 | 0.061180048  | 0.140412972 | 0.435715075  | 0.663043467 | 0.784647984 |
| ENSG00000123131 | 375.1137119 | 0.683662745  | 0.102600066 | 6.663375315  | 2.68E-11    | 4.51E-10    |
| ENSG00000123136 | 478.1360329 | 0.587851236  | 0.101717699 | 5.77924237   | 7.50E-09    | 9.39E-08    |
| ENSG00000123143 | 720.0127352 | 0.240837308  | 0.089890933 | 2.679216898  | 0.007379458 | 0.024948072 |
| ENSG00000123144 | 610.9694678 | 0.029345094  | 0.086187462 | 0.34047985   | 0.733495195 | 0.835693316 |
| ENSG00000123146 | 1140.33868  | 0.090012956  | 0.076606145 | 1.175009609  | 0.239990871 | 0.402189426 |
| ENSG00000123154 | 62.40694895 | 0.012325877  | 0.227167572 | 0.054258964  | 0.956728843 | 0.97684684  |
| ENSG00000123159 | 490.4517329 | -0.097365417 | 0.09027226  | -1.078575154 | 0.280777162 | 0.449518669 |
| ENSG00000123178 | 84.23798679 | 0.263860634  | 0.206020757 | 1.280747815  | 0.200282259 | 0.352419503 |
| ENSG00000123179 | 89.7197158  | 0.206007472  | 0.211598893 | 0.973575376  | 0.330267418 | 0.502520193 |
| ENSG00000123191 | 109.0500239 | 0.055433473  | 0.169118656 | 0.327778577  | 0.743079086 | 0.842922019 |
| ENSG00000123200 | 1376.907538 | 0.010907508  | 0.073814112 | 0.147769954  | 0.882524323 | 0.935256066 |
| ENSG00000123213 | 440.8129356 | -0.152484916 | 0.109008771 | -1.398831632 | 0.161863478 | 0.301587696 |
| ENSG00000123219 | 141.8649413 | -0.47098506  | 0.158632411 | -2.969034244 | 0.002987373 | 0.011493736 |
| ENSG00000123240 | 253.7039995 | 0.153216098  | 0.123482746 | 1.240789531  | 0.21468351  | 0.370701814 |
| ENSG00000123268 | 348.7127058 | 0.853242433  | 0.105806936 | 8.064144591  | 7.38E-16    | 1.90E-14    |
| ENSG00000123297 | 15.18308505 | 0.531956421  | 0.44078731  | 1.206832432  | 0.227496683 | 0.386083074 |
| ENSG00000123349 | 11.2106627  | 0.426775824  | 0.574034788 | 0.743466829  | 0.457199097 | 0.620809639 |
| ENSG00000123352 | 339.06077   | -0.062577554 | 0.104050257 | -0.601416622 | 0.54756253  | 0.695834778 |
| ENSG00000123353 | 97.80904876 | 0.051484632  | 0.187081674 | 0.275198691  | 0.783163593 | 0.870477844 |
| ENSG00000123358 | 243.7894808 | -0.804686922 | 0.12687029  | -6.34259542  | 2.26E-10    | 3.42E-09    |
| ENSG00000123374 | 258.4591253 | -0.058338779 | 0.123369829 | -0.472877196 | 0.636300795 | 0.765247362 |
| ENSG00000123384 | 1703.907409 | -0.284052349 | 0.064746162 | -4.387168886 | 1.15E-05    | 8.13E-05    |
| ENSG00000123388 | 48.53600705 | -0.034020836 | 0.255789217 | -0.1330034   | 0.894190692 | 0.942712147 |
| ENSG00000123395 | 200.794722  | 0.181074547  | 0.135566152 | 1.335691426  | 0.181650153 | 0.328354098 |
| ENSG00000123411 | 133.3820282 | -0.046916713 | 0.161300517 | -0.290865234 | 0.771154392 | 0.863277474 |
| ENSG00000123415 | 91.12244694 | 0.117031005  | 0.185307744 | 0.631549457  | 0.527681322 | 0.680530622 |
| ENSG00000123416 | 2773.148437 | 0.174501703  | 0.077769293 | 2.243838107  | 0.02484282  | 0.068870552 |
| ENSG00000123427 | 37.6867783  | 0.394107692  | 0.290117424 | 1.358441997  | 0.174323476 | 0.318719493 |

|                 |             |              |             |              |             |             |
|-----------------|-------------|--------------|-------------|--------------|-------------|-------------|
| ENSG00000123444 | 156.6567417 | 0.145564593  | 0.151815979 | 0.958822612  | 0.337648116 | 0.509610303 |
| ENSG00000123453 | 141.936408  | 0.4490348    | 0.156243718 | 2.873938258  | 0.004053882 | 0.014973674 |
| ENSG00000123472 | 335.3538659 | -0.430726449 | 0.111540583 | -3.861611944 | 0.000112641 | 0.000641896 |
| ENSG00000123473 | 319.2098136 | -0.309256959 | 0.112497162 | -2.749020085 | 0.005977372 | 0.020772922 |
| ENSG00000123485 | 542.6904171 | -0.009739394 | 0.088149268 | -0.110487515 | 0.912022751 | 0.952834567 |
| ENSG00000123496 | 8.382892828 | -1.313294321 | 0.635895856 | -2.065266363 | 0.038897804 | 0.099616674 |
| ENSG00000123505 | 811.9513635 | -0.217207059 | 0.077412368 | -2.805844403 | 0.005018492 | 0.017955873 |
| ENSG00000123545 | 119.1804002 | 0.377633179  | 0.170104766 | 2.220003523  | 0.026418528 | 0.072622518 |
| ENSG00000123552 | 128.139812  | 0.088062291  | 0.16101974  | 0.546903696  | 0.584444896 | 0.726457611 |
| ENSG00000123562 | 892.2835749 | 0.083604455  | 0.074822212 | 1.11737481   | 0.263834101 | 0.430338785 |
| ENSG00000123575 | 211.3457984 | -0.222391337 | 0.131278068 | -1.694047907 | 0.09025618  | 0.193709482 |
| ENSG00000123595 | 47.31443534 | 0.095612584  | 0.251876875 | 0.379600487  | 0.704241999 | 0.814598762 |
| ENSG00000123600 | 398.4177348 | -0.204231953 | 0.102718323 | -1.988271885 | 0.046781628 | 0.115795865 |
| ENSG00000123607 | 386.9988383 | -0.404771452 | 0.10386536  | -3.897078406 | 9.74E-05    | 0.000561189 |
| ENSG00000123636 | 681.0666877 | -0.318669044 | 0.094260518 | -3.380726643 | 0.000722944 | 0.003365992 |
| ENSG00000123643 | 124.2752042 | -0.419758952 | 0.168702743 | -2.488157235 | 0.012840695 | 0.039914415 |
| ENSG00000123684 | 487.4141315 | -0.171909558 | 0.090349053 | -1.902726728 | 0.057076212 | 0.135235532 |
| ENSG00000123685 | 16.39110476 | -0.885704428 | 0.449700904 | -1.969541135 | 0.048890984 | 0.119834522 |
| ENSG00000123728 | 180.7155803 | -0.29162706  | 0.138341768 | -2.108018883 | 0.035029356 | 0.091528528 |
| ENSG00000123737 | 397.0020467 | -0.03498953  | 0.09735022  | -0.359419115 | 0.719281577 | 0.82519996  |
| ENSG00000123739 | 69.43238329 | -0.008914027 | 0.214588151 | -0.041540163 | 0.966865275 | 0.982787985 |
| ENSG00000123810 | 30.67279708 | 0.175677776  | 0.322089057 | 0.545432303  | 0.585456229 | 0.727328526 |
| ENSG00000123815 | 302.2982756 | 0.402336129  | 0.111156827 | 3.619535912  | 0.000295132 | 0.001516911 |
| ENSG00000123836 | 186.0093129 | -0.007899476 | 0.140436995 | -0.056249255 | 0.955143244 | 0.975916289 |
| ENSG00000123908 | 1714.020191 | -0.042509364 | 0.067691292 | -0.627988661 | 0.530011368 | 0.682240213 |
| ENSG00000123933 | 479.9164063 | 0.203863594  | 0.09907848  | 2.057597096  | 0.039628826 | 0.101101728 |
| ENSG00000123965 | 9.798905073 | -0.161710869 | 0.569021393 | -0.284191194 | 0.776263863 | 0.865892042 |
| ENSG00000123975 | 688.1385097 | -0.015473818 | 0.1006208   | -0.153783495 | 0.877780448 | 0.932691525 |
| ENSG00000123983 | 1498.124745 | -0.236205989 | 0.069029311 | -3.421821637 | 0.000622031 | 0.002942967 |
| ENSG00000123989 | 899.1065777 | 0.109432937  | 0.24737545  | 0.442375898  | 0.658217217 | 0.781108156 |
| ENSG00000123992 | 375.9395618 | 0.34870817   | 0.102441402 | 3.403976941  | 0.000664124 | 0.003120048 |
| ENSG00000124006 | 423.6442759 | -0.687966564 | 0.101929407 | -6.749441469 | 1.48E-11    | 2.57E-10    |
| ENSG00000124067 | 272.8455773 | -0.234491901 | 0.118221964 | -1.983488463 | 0.047312894 | 0.116699601 |
| ENSG00000124074 | 120.342475  | -0.238315205 | 0.167428623 | -1.423383886 | 0.154624901 | 0.291898399 |
| ENSG00000124098 | 155.2871055 | -0.135696441 | 0.1508995   | -0.899250431 | 0.368519284 | 0.539846739 |
| ENSG00000124104 | 166.4990935 | -0.181242399 | 0.139748971 | -1.296914012 | 0.194660775 | 0.345863889 |
| ENSG00000124120 | 147.3764938 | -0.343050554 | 0.157858318 | -2.173154748 | 0.029768672 | 0.079968486 |
| ENSG00000124126 | 78.35840498 | -3.277323325 | 0.279110968 | -11.74200839 | 7.76E-32    | 4.47E-30    |
| ENSG00000124140 | 30.25516532 | -0.189394508 | 0.317181133 | -0.597117825 | 0.550428718 | 0.698263542 |
| ENSG00000124143 | 23.64860199 | 1.61427451   | 0.383634803 | 4.207841674  | 2.58E-05    | 0.000169472 |
| ENSG00000124145 | 38.13351011 | -0.530634231 | 0.307644531 | -1.72482907  | 0.084558281 | 0.184403114 |
| ENSG00000124151 | 526.6022759 | -0.36603459  | 0.099031668 | -3.696136763 | 0.000218905 | 0.001160362 |
| ENSG00000124155 | 393.3732772 | 0.145818308  | 0.099693468 | 1.46266662   | 0.143558624 | 0.275939791 |
| ENSG00000124160 | 313.5125232 | -0.037947162 | 0.109897986 | -0.345294423 | 0.729873039 | 0.833064644 |
| ENSG00000124164 | 471.6510247 | 0.135516537  | 0.095639835 | 1.416946586  | 0.156498545 | 0.294209724 |
| ENSG00000124171 | 128.3709096 | -0.488714203 | 0.168320927 | -2.903466675 | 0.003690562 | 0.013787588 |
| ENSG00000124172 | 1099.212568 | -0.174014395 | 0.081057867 | -2.146792191 | 0.031809829 | 0.084387662 |
| ENSG00000124177 | 609.0958175 | -1.246680955 | 0.086951732 | -14.33762074 | 1.27E-46    | 1.20E-44    |
| ENSG00000124181 | 635.0294429 | -0.384991305 | 0.086936533 | -4.428417966 | 9.49E-06    | 6.83E-05    |
| ENSG00000124193 | 526.8356036 | -0.050831116 | 0.089526844 | -0.567775143 | 0.57018766  | 0.715255051 |



|                 |             |              |             |              |             |             |
|-----------------|-------------|--------------|-------------|--------------|-------------|-------------|
| ENSG00000124198 | 611.8678409 | 0.068462395  | 0.089333248 | 0.766370826  | 0.443455687 | 0.608381876 |
| ENSG00000124201 | 380.576191  | 0.548152373  | 0.10108833  | 5.422508929  | 5.88E-08    | 6.43E-07    |
| ENSG00000124207 | 1405.878383 | 0.125853091  | 0.07322358  | 1.718750853  | 0.085659748 | 0.18614828  |
| ENSG00000124209 | 311.6278358 | 0.186767853  | 0.109141459 | 1.711245698  | 0.087035766 | 0.188409833 |
| ENSG00000124212 | 39.14400316 | -0.002795864 | 0.291138674 | -0.009603204 | 0.99233787  | 0.996167373 |
| ENSG00000124214 | 987.0296324 | 0.139611909  | 0.072281066 | 1.931514251  | 0.053419489 | 0.128348228 |
| ENSG00000124216 | 34.10727711 | 0.452486594  | 0.301415949 | 1.501203222  | 0.133303007 | 0.261706127 |
| ENSG00000124217 | 78.66482565 | -0.085898069 | 0.205115701 | -0.418778613 | 0.675377937 | 0.793548715 |
| ENSG00000124222 | 229.7391259 | 0.126608263  | 0.125800385 | 1.006421905  | 0.314212661 | 0.485453723 |
| ENSG00000124226 | 245.7496751 | 0.160878828  | 0.117954051 | 1.363911011  | 0.172595575 | 0.316136399 |
| ENSG00000124228 | 966.886035  | 0.52042235   | 0.074108399 | 7.022447619  | 2.18E-12    | 4.20E-11    |
| ENSG00000124243 | 49.73060877 | -0.698599827 | 0.250096835 | -2.793317349 | 0.005217048 | 0.018557578 |
| ENSG00000124257 | 19.40229987 | 0.090124526  | 0.40677705  | 0.221557548  | 0.824658333 | 0.897495592 |
| ENSG00000124275 | 220.0092491 | 0.162096742  | 0.13672141  | 1.185598813  | 0.235780771 | 0.396838305 |
| ENSG00000124279 | 40.02232637 | -0.459476955 | 0.275665418 | -1.66679215  | 0.095555742 | 0.202637606 |
| ENSG00000124299 | 163.5740017 | 0.310162416  | 0.152794359 | 2.029933679  | 0.042363281 | 0.107182459 |
| ENSG00000124313 | 308.7601785 | -0.161968825 | 0.110473837 | -1.466128346 | 0.142613325 | 0.27469394  |
| ENSG00000124333 | 116.788904  | -0.321655276 | 0.165255829 | -1.946408053 | 0.051605743 | 0.124854611 |
| ENSG00000124356 | 128.7507821 | -1.880894065 | 0.178971552 | -10.50945829 | 7.81E-26    | 3.65E-24    |
| ENSG00000124357 | 82.01592265 | -0.216910365 | 0.199638146 | -1.086517628 | 0.277250046 | 0.445853623 |
| ENSG00000124370 | 43.62517071 | 0.190684781  | 0.273773404 | 0.696505865  | 0.486112086 | 0.646507903 |
| ENSG00000124374 | 20.73609477 | -1.015258253 | 0.410135608 | -2.475420896 | 0.013307924 | 0.041162584 |
| ENSG00000124380 | 187.9482834 | 0.154948207  | 0.139971387 | 1.106999154  | 0.268294294 | 0.435339026 |
| ENSG00000124383 | 530.7490606 | 0.395750255  | 0.089535696 | 4.420027667  | 9.87E-06    | 7.09E-05    |
| ENSG00000124406 | 272.3183025 | 0.165017207  | 0.122006989 | 1.352522578  | 0.176208201 | 0.321120472 |
| ENSG00000124422 | 2180.51017  | -0.145067087 | 0.064124325 | -2.262278588 | 0.023680196 | 0.066235707 |
| ENSG00000124444 | 53.52360403 | 0.22908705   | 0.248137212 | 0.923227305  | 0.355888762 | 0.527227319 |
| ENSG00000124459 | 101.6372148 | 0.352899218  | 0.177575038 | 1.987324466  | 0.046886452 | 0.116034883 |
| ENSG00000124486 | 1560.773248 | 0.130416462  | 0.065921095 | 1.978372214  | 0.047886732 | 0.117946872 |
| ENSG00000124496 | 699.4170066 | -0.068296214 | 0.084402354 | -0.809174278 | 0.418414908 | 0.586398705 |
| ENSG00000124507 | 11.38677546 | -0.541208993 | 0.529207826 | -1.022677606 | 0.306460303 | 0.47752037  |
| ENSG00000124508 | 39.80812212 | -0.445233773 | 0.282595271 | -1.575517425 | 0.11513706  | 0.233988755 |
| ENSG00000124523 | 224.5104182 | -0.262311739 | 0.125393141 | -2.091914578 | 0.036446158 | 0.094579564 |
| ENSG00000124532 | 242.0862311 | 0.078332656  | 0.119329681 | 0.656438995  | 0.511541707 | 0.667685036 |
| ENSG00000124535 | 645.2801092 | 0.301374812  | 0.086233942 | 3.494851379  | 0.000474326 | 0.002311369 |
| ENSG00000124541 | 338.0524576 | 0.368599647  | 0.10684847  | 3.449741946  | 0.000561123 | 0.002682808 |
| ENSG00000124562 | 930.0421784 | 0.330368792  | 0.0873247   | 3.783222757  | 0.000154811 | 0.00085246  |
| ENSG00000124570 | 569.3045896 | -0.064904657 | 0.087581717 | -0.741075409 | 0.458647719 | 0.622312879 |
| ENSG00000124571 | 680.9444583 | -0.097811349 | 0.092307767 | -1.059622091 | 0.289316559 | 0.459478891 |
| ENSG00000124574 | 167.9000626 | -0.038503463 | 0.142459165 | -0.270277191 | 0.786947011 | 0.872399068 |
| ENSG00000124575 | 1689.342822 | -0.042310518 | 0.073545668 | -0.575295851 | 0.565091227 | 0.71091414  |
| ENSG00000124587 | 110.2948314 | -0.317543066 | 0.179521612 | -1.768829177 | 0.076922386 | 0.171078017 |
| ENSG00000124588 | 344.6686205 | 0.486733106  | 0.123033209 | 3.956111624  | 7.62E-05    | 0.000450376 |
| ENSG00000124593 | 8.820203793 | -1.086658399 | 0.635800365 | -1.709118866 | 0.087428934 | 0.188922499 |
| ENSG00000124596 | 176.518015  | -0.25077551  | 0.138320318 | -1.813005593 | 0.069830959 | 0.158749875 |
| ENSG00000124608 | 255.7334806 | -0.185445872 | 0.123894772 | -1.496801428 | 0.134444935 | 0.263138915 |
| ENSG00000124613 | 26.25713095 | -0.030343454 | 0.336293093 | -0.090229193 | 0.928105086 | 0.960813764 |
| ENSG00000124614 | 17.27938067 | 0.722800849  | 0.428797372 | 1.68564664   | 0.09186388  | 0.196439629 |
| ENSG00000124635 | 481.5962282 | -0.511549068 | 0.098281876 | -5.204917626 | 1.94E-07    | 1.95E-06    |
| ENSG00000124641 | 28.20255203 | 0.0094917    | 0.328940399 | 0.028855381  | 0.976979932 | 0.988555428 |

|                 |             |              |             |              |             |             |
|-----------------|-------------|--------------|-------------|--------------|-------------|-------------|
| ENSG00000124659 | 217.2544478 | 0.059051448  | 0.132303229 | 0.446334136  | 0.655355902 | 0.779028886 |
| ENSG00000124688 | 64.12723633 | 0.234058405  | 0.218750663 | 1.069978036  | 0.284629195 | 0.454184517 |
| ENSG00000124702 | 271.1667266 | -0.350060898 | 0.116626119 | -3.001565191 | 0.002685955 | 0.01050379  |
| ENSG00000124733 | 433.8813688 | 0.181688774  | 0.107448099 | 1.690944518  | 0.0908474   | 0.194770059 |
| ENSG00000124762 | 363.0607642 | 0.426694296  | 0.111375769 | 3.831123237  | 0.00012756  | 0.00071788  |
| ENSG00000124766 | 343.2333685 | -0.179049792 | 0.116034004 | -1.543080354 | 0.122811281 | 0.246376758 |
| ENSG00000124767 | 768.3932887 | 0.008849041  | 0.081600164 | 0.108443908  | 0.913643573 | 0.953559051 |
| ENSG00000124782 | 1188.307141 | -0.136657931 | 0.069376363 | -1.969805354 | 0.048860683 | 0.119781154 |
| ENSG00000124783 | 1006.694982 | 0.180081464  | 0.072872491 | 2.471185794  | 0.013466583 | 0.041525905 |
| ENSG00000124784 | 287.496156  | 0.301523765  | 0.111754867 | 2.698081724  | 0.006974032 | 0.023720151 |
| ENSG00000124786 | 50.05741884 | -0.021414466 | 0.252516579 | -0.084804198 | 0.932417056 | 0.963270344 |
| ENSG00000124787 | 52.03011931 | 0.387586227  | 0.243091993 | 1.594401455  | 0.110846147 | 0.227340608 |
| ENSG00000124789 | 1037.484653 | -0.107578029 | 0.085247552 | -1.261948613 | 0.206967278 | 0.3608377   |
| ENSG00000124795 | 2057.336944 | 0.014422442  | 0.06608412  | 0.218243692  | 0.827239244 | 0.898686295 |
| ENSG00000124802 | 31.43356364 | -0.189319184 | 0.315303965 | -0.600433884 | 0.548217112 | 0.696527295 |
| ENSG00000124831 | 678.5591107 | -0.499682588 | 0.081668734 | -6.118407455 | 9.45E-10    | 1.32E-08    |
| ENSG00000124920 | 50.46558788 | 1.057418002  | 0.255168094 | 4.144005569  | 3.41E-05    | 0.000218312 |
| ENSG00000124942 | 2069.457106 | -0.427120568 | 0.063675733 | -6.707744854 | 1.98E-11    | 3.38E-10    |
| ENSG00000125037 | 223.076857  | 0.29005543   | 0.125488166 | 2.311416605  | 0.020809855 | 0.05966851  |
| ENSG00000125089 | 9.460125208 | 1.654802657  | 0.612349509 | 2.702382597  | 0.006884449 | 0.023460907 |
| ENSG00000125107 | 3347.429431 | -0.095011203 | 0.077515314 | -1.225708799 | 0.220308278 | 0.377905303 |
| ENSG00000125124 | 162.9013783 | 0.02392977   | 0.145859574 | 0.164060332  | 0.869683649 | 0.927526097 |
| ENSG00000125148 | 178.3588123 | 0.090470157  | 0.13912056  | 0.650300411  | 0.515498192 | 0.671096242 |
| ENSG00000125149 | 150.2803625 | 0.103340279  | 0.159898132 | 0.646288216  | 0.518092718 | 0.673067613 |
| ENSG00000125166 | 1370.291822 | -0.024317686 | 0.078087214 | -0.311417005 | 0.755483628 | 0.852102835 |
| ENSG00000125170 | 192.1568619 | 0.644999111  | 0.138934751 | 4.642460631  | 3.44E-06    | 2.74E-05    |
| ENSG00000125246 | 46.86019058 | -0.471667221 | 0.264018371 | -1.786493942 | 0.074019317 | 0.165749936 |
| ENSG00000125247 | 130.2629868 | -0.444667333 | 0.159504067 | -2.787811878 | 0.005306535 | 0.018804464 |
| ENSG00000125249 | 187.9994945 | 0.192754636  | 0.137263663 | 1.404265573  | 0.160239782 | 0.299280444 |
| ENSG00000125257 | 325.228752  | -0.105213476 | 0.109604249 | -0.959939759 | 0.337085534 | 0.508979953 |
| ENSG00000125266 | 37.60898796 | 0.176304456  | 0.284133253 | 0.6204992    | 0.534929181 | 0.685910562 |
| ENSG00000125304 | 580.4977871 | 0.014910714  | 0.094768516 | 0.157338262  | 0.874978267 | 0.930840633 |
| ENSG00000125319 | 103.7421226 | -0.0340609   | 0.17278417  | -0.197129748 | 0.843726004 | 0.909432081 |
| ENSG00000125337 | 10.45219906 | -0.2120399   | 0.54086633  | -0.39203753  | 0.695030484 | 0.808537739 |
| ENSG00000125347 | 76.95391344 | 0.641298319  | 0.210779745 | 3.042504488  | 0.002346183 | 0.009360078 |
| ENSG00000125351 | 470.5270665 | -0.106509678 | 0.097612487 | -1.091148089 | 0.275207725 | 0.443584959 |
| ENSG00000125352 | 129.7241913 | 0.026314408  | 0.156630695 | 0.168002883  | 0.866581011 | 0.925200537 |
| ENSG00000125354 | 685.4326849 | -0.082221415 | 0.089448116 | -0.9192079   | 0.35798684  | 0.529316947 |
| ENSG00000125356 | 1536.115819 | 0.479808631  | 0.078705952 | 6.096217879  | 1.09E-09    | 1.50E-08    |
| ENSG00000125375 | 45.42041213 | -0.472965862 | 0.266881676 | -1.772193088 | 0.076362511 | 0.170048222 |
| ENSG00000125384 | 41.06249797 | -3.46102056  | 0.400856265 | -8.634068782 | 5.92E-18    | 1.76E-16    |
| ENSG00000125386 | 582.7477491 | -0.339737921 | 0.087161935 | -3.897778554 | 9.71E-05    | 0.000560029 |
| ENSG00000125388 | 40.63752258 | 0.075212629  | 0.270824936 | 0.277716778  | 0.78122978  | 0.868878442 |
| ENSG00000125434 | 296.7822982 | -1.066606676 | 0.114881479 | -9.284409359 | 1.63E-20    | 5.63E-19    |
| ENSG00000125445 | 787.1956348 | 0.293654142  | 0.080502976 | 3.647742671  | 0.000264554 | 0.001373825 |
| ENSG00000125447 | 472.9103444 | -0.033235512 | 0.093435982 | -0.355703566 | 0.722062574 | 0.827735087 |
| ENSG00000125449 | 60.74610687 | 0.158611537  | 0.243661841 | 0.650949429  | 0.515079132 | 0.670845893 |
| ENSG00000125450 | 536.3628116 | 0.149968436  | 0.088273555 | 1.698905582  | 0.089336975 | 0.192235982 |
| ENSG00000125454 | 266.4227484 | 0.564861209  | 0.115567142 | 4.887731938  | 1.02E-06    | 9.02E-06    |
| ENSG00000125457 | 141.7889895 | 0.266714976  | 0.155685556 | 1.713164557  | 0.08668227  | 0.187847246 |

|                 |             |              |             |              |             |             |
|-----------------|-------------|--------------|-------------|--------------|-------------|-------------|
| ENSG00000125458 | 469.071808  | 0.088546005  | 0.096802635 | 0.914706557  | 0.360345701 | 0.531671417 |
| ENSG00000125459 | 56.0222347  | 0.368368769  | 0.237571325 | 1.55056074   | 0.121006987 | 0.24345247  |
| ENSG00000125482 | 179.2314325 | 0.094961423  | 0.138632772 | 0.684985387  | 0.493353143 | 0.652616216 |
| ENSG00000125484 | 733.8341262 | -0.141488149 | 0.08532659  | -1.658195278 | 0.097278058 | 0.205082526 |
| ENSG00000125485 | 182.5609724 | 0.11146988   | 0.143286357 | 0.777951801  | 0.436597429 | 0.602647464 |
| ENSG00000125503 | 320.8617446 | 0.171176539  | 0.113318073 | 1.51058462   | 0.130894315 | 0.257997422 |
| ENSG00000125505 | 484.277767  | 0.392183113  | 0.098178593 | 3.994588846  | 6.48E-05    | 0.000389533 |
| ENSG00000125510 | 14.014978   | -1.777459228 | 0.50572228  | -3.514694327 | 0.00044026  | 0.002164627 |
| ENSG00000125520 | 459.1125442 | -0.246851497 | 0.106601451 | -2.315648557 | 0.020577465 | 0.059157168 |
| ENSG00000125534 | 596.5643255 | 0.266467844  | 0.186718782 | 1.427107872  | 0.153548804 | 0.290139904 |
| ENSG00000125611 | 110.7052712 | 0.064775735  | 0.167986175 | 0.385601583  | 0.69979176  | 0.811562424 |
| ENSG00000125629 | 23.70317033 | 0.738101211  | 0.358351235 | 2.059714435  | 0.039425849 | 0.100657015 |
| ENSG00000125630 | 696.0942753 | 0.262996971  | 0.080522881 | 3.266114795  | 0.00109034  | 0.004849909 |
| ENSG00000125633 | 186.4300231 | 0.046715666  | 0.13949839  | 0.33488319   | 0.737713203 | 0.839013631 |
| ENSG00000125648 | 1190.68541  | 0.311913894  | 0.071049268 | 4.390107055  | 1.13E-05    | 8.04E-05    |
| ENSG00000125650 | 38.8118746  | -0.524009737 | 0.296215733 | -1.769013857 | 0.076891562 | 0.171043492 |
| ENSG00000125651 | 1137.893701 | -0.067214731 | 0.072369739 | -0.92876845  | 0.353009098 | 0.524343746 |
| ENSG00000125652 | 108.4070509 | -0.604412627 | 0.172457269 | -3.504709478 | 0.000457106 | 0.002234934 |
| ENSG00000125656 | 424.9238825 | 0.242359262  | 0.100679066 | 2.407245845  | 0.016073346 | 0.048295676 |
| ENSG00000125657 | 15.75711276 | 0.38193867   | 0.459872884 | 0.830530964  | 0.406238649 | 0.57446427  |
| ENSG00000125676 | 961.3820573 | -0.025745322 | 0.073482816 | -0.350358408 | 0.726069736 | 0.830545732 |
| ENSG00000125686 | 1228.790996 | 0.00400982   | 0.069408504 | 0.057771313  | 0.953930789 | 0.974890199 |
| ENSG00000125691 | 6657.487192 | 0.148116342  | 0.063621742 | 2.328077422  | 0.019907993 | 0.057564343 |
| ENSG00000125703 | 49.25112175 | -0.224021609 | 0.257109953 | -0.871306639 | 0.383586747 | 0.552753696 |
| ENSG00000125726 | 65.79955174 | 2.274877718  | 0.246521031 | 9.227925526  | 2.76E-20    | 9.48E-19    |
| ENSG00000125730 | 19.06057994 | -0.955323957 | 0.408572937 | -2.33819686  | 0.019377038 | 0.056283966 |
| ENSG00000125733 | 206.3730768 | -0.474241478 | 0.130534488 | -3.633074192 | 0.000280064 | 0.001447412 |
| ENSG00000125734 | 214.8200159 | 0.119115595  | 0.132776931 | 0.897110621  | 0.369659892 | 0.541059478 |
| ENSG00000125740 | 765.2739523 | 0.342935509  | 0.220331261 | 1.556454166  | 0.119600134 | 0.241313283 |
| ENSG00000125741 | 214.5026039 | -0.077687539 | 0.125326628 | -0.619880549 | 0.535336433 | 0.686182213 |
| ENSG00000125743 | 541.79708   | 0.244469768  | 0.098570981 | 2.480139339  | 0.013133105 | 0.040688294 |
| ENSG00000125744 | 322.1259345 | -1.148996017 | 0.113559632 | -10.11799704 | 4.60E-24    | 1.93E-22    |
| ENSG00000125746 | 362.4032549 | -0.573006346 | 0.111540589 | -5.137200281 | 2.79E-07    | 2.74E-06    |
| ENSG00000125753 | 476.9170161 | -0.11333363  | 0.10059229  | -1.126663192 | 0.25988491  | 0.425974404 |
| ENSG00000125755 | 1009.796768 | 0.120841666  | 0.073079865 | 1.653556228  | 0.098217713 | 0.206815201 |
| ENSG00000125772 | 81.00627363 | -0.35520373  | 0.197805158 | -1.795725319 | 0.072538213 | 0.163302323 |
| ENSG00000125775 | 26.18024691 | 0.552417337  | 0.342760416 | 1.61167192   | 0.107033351 | 0.221259462 |
| ENSG00000125779 | 268.2261047 | -0.299521756 | 0.12105403  | -2.474281572 | 0.013350443 | 0.041270615 |
| ENSG00000125812 | 155.0408534 | -0.024480586 | 0.145440688 | -0.168320064 | 0.86633149  | 0.925004442 |
| ENSG00000125814 | 46.11887852 | 0.804765696  | 0.269495073 | 2.986198183  | 0.002824695 | 0.010963938 |
| ENSG00000125817 | 527.7236257 | 0.328977418  | 0.116400866 | 2.826245466  | 0.004709716 | 0.017020164 |
| ENSG00000125818 | 762.5720163 | 0.233712221  | 0.082265574 | 2.840948052  | 0.004497964 | 0.016360121 |
| ENSG00000125821 | 159.0589427 | 0.141114432  | 0.150066566 | 0.940345581  | 0.347040326 | 0.518998461 |
| ENSG00000125826 | 301.4281742 | 0.258272541  | 0.111921158 | 2.307629275  | 0.021019765 | 0.060159869 |
| ENSG00000125827 | 119.2688405 | -0.163031523 | 0.171335512 | -0.951533757 | 0.341333491 | 0.513297457 |
| ENSG00000125834 | 418.1049718 | -0.256031996 | 0.101727689 | -2.516836843 | 0.011841365 | 0.037219882 |
| ENSG00000125835 | 759.0985267 | 0.477327133  | 0.078507756 | 6.079999715  | 1.20E-09    | 1.66E-08    |
| ENSG00000125841 | 474.5034179 | -0.243736105 | 0.096150764 | -2.534936746 | 0.011246763 | 0.035621935 |
| ENSG00000125843 | 50.06150505 | 0.252308742  | 0.259073831 | 0.973887409  | 0.330112446 | 0.502393232 |
| ENSG00000125844 | 1719.874144 | -0.227377683 | 0.067273945 | -3.379877372 | 0.000725182 | 0.003374173 |

|                 |             |              |             |              |             |             |
|-----------------|-------------|--------------|-------------|--------------|-------------|-------------|
| ENSG00000125846 | 159.9539067 | 0.053243051  | 0.147320595 | 0.36140942   | 0.717793407 | 0.824098405 |
| ENSG00000125848 | 32.54727878 | -5.131323439 | 0.697153376 | -7.360393878 | 1.83E-13    | 3.95E-12    |
| ENSG00000125863 | 130.5676623 | 0.487071731  | 0.161713177 | 3.01194832   | 0.002595768 | 0.010210796 |
| ENSG00000125868 | 490.6814298 | 0.153850764  | 0.094898239 | 1.62121832   | 0.104970825 | 0.21783501  |
| ENSG00000125870 | 413.4822328 | 0.204012015  | 0.104193235 | 1.958015934  | 0.050228143 | 0.122279848 |
| ENSG00000125871 | 299.6916324 | 0.060441086  | 0.11202526  | 0.539530874  | 0.5895206   | 0.730955589 |
| ENSG00000125875 | 369.5354429 | 0.045554246  | 0.104476187 | 0.436025155  | 0.662818479 | 0.784604829 |
| ENSG00000125877 | 123.2588631 | 0.664401312  | 0.195935873 | 3.39091204   | 0.000696605 | 0.003258476 |
| ENSG00000125885 | 198.6856808 | -0.358262293 | 0.140823082 | -2.544059459 | 0.010957243 | 0.03486215  |
| ENSG00000125898 | 17.17767674 | -0.253692313 | 0.427426798 | -0.593533944 | 0.552823874 | 0.700037587 |
| ENSG00000125901 | 695.5731905 | 0.187143255  | 0.090431144 | 2.069455789  | 0.038503336 | 0.09878655  |
| ENSG00000125912 | 830.0043084 | 0.462831544  | 0.101314033 | 4.568286665  | 4.92E-06    | 3.77E-05    |
| ENSG00000125931 | 5.89589968  | -5.839983863 | 1.312350692 | -4.450017742 | 8.59E-06    | 6.25E-05    |
| ENSG00000125944 | 2568.803065 | -0.098250558 | 0.058819149 | -1.670383879 | 0.094843437 | 0.201339846 |
| ENSG00000125945 | 71.41246406 | -0.054574852 | 0.21547099  | -0.253281668 | 0.800050561 | 0.880924836 |
| ENSG00000125952 | 416.4618361 | 0.437061221  | 0.097361794 | 4.489042395  | 7.15E-06    | 5.29E-05    |
| ENSG00000125962 | 82.10206589 | -0.031989686 | 0.196668286 | -0.162658081 | 0.870787654 | 0.928112848 |
| ENSG00000125967 | 283.2704539 | 0.420657759  | 0.114490786 | 3.674162556  | 0.000238631 | 0.001252633 |
| ENSG00000125968 | 175.4013106 | 0.951124374  | 0.141081616 | 6.741660616  | 1.57E-11    | 2.71E-10    |
| ENSG00000125970 | 1324.961421 | -0.054819814 | 0.068568103 | -0.799494397 | 0.424003794 | 0.591223079 |
| ENSG00000125971 | 30.42765107 | 0.169410668  | 0.31254274  | 0.542040003  | 0.587790948 | 0.729570925 |
| ENSG00000125977 | 849.7439832 | -0.009570797 | 0.076173538 | -0.125644637 | 0.900013228 | 0.945967201 |
| ENSG00000125991 | 761.3092044 | 0.373740264  | 0.077329497 | 4.833088025  | 1.34E-06    | 1.16E-05    |
| ENSG00000125995 | 944.5781508 | 0.554111301  | 0.087551624 | 6.328966603  | 2.47E-10    | 3.71E-09    |
| ENSG00000126001 | 1438.4375   | 0.031306265  | 0.075697715 | 0.41356948   | 0.679189428 | 0.796574593 |
| ENSG00000126003 | 639.4044942 | -0.070579962 | 0.088033731 | -0.801737706 | 0.4227047   | 0.590003496 |
| ENSG00000126005 | 111.2582049 | -0.173198196 | 0.168377584 | -1.02862977  | 0.303653683 | 0.474463102 |
| ENSG00000126012 | 1591.012388 | 0.356134795  | 0.068126092 | 5.227582942  | 1.72E-07    | 1.75E-06    |
| ENSG00000126016 | 52.43104382 | 0.937887089  | 0.256138333 | 3.661642825  | 0.000250603 | 0.001308633 |
| ENSG00000126062 | 293.7498789 | 0.19736359   | 0.117776018 | 1.675753638  | 0.093786459 | 0.199578607 |
| ENSG00000126067 | 813.1559801 | 0.515079325  | 0.08220993  | 6.265414988  | 3.72E-10    | 5.49E-09    |
| ENSG00000126070 | 478.0031535 | -0.350441496 | 0.094072531 | -3.725226602 | 0.00019514  | 0.001046233 |
| ENSG00000126088 | 347.4636623 | -0.179221542 | 0.103657685 | -1.728974964 | 0.083813576 | 0.183241914 |
| ENSG00000126091 | 84.37061707 | -0.667190703 | 0.216165207 | -3.086485155 | 0.002025381 | 0.008260895 |
| ENSG00000126106 | 113.2495164 | 0.008892127  | 0.166094688 | 0.053536492  | 0.957304456 | 0.977058468 |
| ENSG00000126107 | 165.3751539 | 0.144080394  | 0.140675816 | 1.024201586  | 0.30574007  | 0.476715591 |
| ENSG00000126214 | 254.0160231 | 0.064712424  | 0.120668854 | 0.536281085  | 0.591764301 | 0.732260534 |
| ENSG00000126215 | 242.2555013 | -0.178792107 | 0.125577033 | -1.423764383 | 0.154514689 | 0.291729548 |
| ENSG00000126216 | 417.2572338 | -0.004585741 | 0.096347441 | -0.047595877 | 0.962038318 | 0.979825424 |
| ENSG00000126217 | 83.90973663 | 0.598031283  | 0.196103533 | 3.049569146  | 0.002291699 | 0.009181829 |
| ENSG00000126226 | 274.3373127 | 0.034131623  | 0.117649037 | 0.290113916  | 0.77172909  | 0.86337203  |
| ENSG00000126243 | 143.293378  | 0.097133934  | 0.151054798 | 0.643037728  | 0.520199619 | 0.674660147 |
| ENSG00000126247 | 1398.516566 | 0.32960555   | 0.069500862 | 4.742467071  | 2.11E-06    | 1.75E-05    |
| ENSG00000126249 | 47.55635052 | -0.436110499 | 0.28960065  | -1.50590304  | 0.132092066 | 0.259927795 |
| ENSG00000126254 | 348.3299729 | 0.309233441  | 0.112992855 | 2.736752173  | 0.006204902 | 0.021441637 |
| ENSG00000126259 | 59.86253991 | -0.893772752 | 0.240674078 | -3.713622841 | 0.000204313 | 0.001090108 |
| ENSG00000126261 | 874.1759198 | 0.10738216   | 0.077573484 | 1.384263725  | 0.166277717 | 0.308058967 |
| ENSG00000126267 | 1440.255496 | 0.054893687  | 0.067345034 | 0.815111132  | 0.4150087   | 0.583079337 |
| ENSG00000126351 | 242.8358097 | 0.1073688    | 0.122232089 | 0.878401087  | 0.379726095 | 0.549218745 |
| ENSG00000126368 | 203.1232277 | 0.49925971   | 0.133836189 | 3.730379021  | 0.000191192 | 0.001026241 |

|                 |             |              |             |              |             |             |
|-----------------|-------------|--------------|-------------|--------------|-------------|-------------|
| ENSG00000126391 | 101.8914398 | 0.403594234  | 0.1773122   | 2.2761786    | 0.022835322 | 0.064256364 |
| ENSG00000126432 | 505.0204701 | 0.02068647   | 0.098168422 | 0.210724277  | 0.83310243  | 0.902386945 |
| ENSG00000126453 | 178.0288894 | 0.017775243  | 0.143721704 | 0.123678211  | 0.901570064 | 0.946938439 |
| ENSG00000126456 | 422.3592577 | 0.131388252  | 0.111790554 | 1.175307274  | 0.239871805 | 0.402037853 |
| ENSG00000126457 | 834.2211685 | 0.218841093  | 0.079739763 | 2.744441213  | 0.006061401 | 0.021018144 |
| ENSG00000126458 | 377.5295274 | -0.668279876 | 0.105067815 | -6.360462292 | 2.01E-10    | 3.06E-09    |
| ENSG00000126461 | 535.7601418 | 0.152649393  | 0.105635168 | 1.445062241  | 0.148440404 | 0.282692835 |
| ENSG00000126464 | 1012.393849 | -0.385044052 | 0.087627974 | -4.394076834 | 1.11E-05    | 7.90E-05    |
| ENSG00000126522 | 77.28620648 | 0.487967626  | 0.207759568 | 2.348713132  | 0.018838414 | 0.054958091 |
| ENSG00000126524 | 390.8698879 | 0.189868932  | 0.101944108 | 1.862480683  | 0.062535366 | 0.145629026 |
| ENSG00000126562 | 27.62813288 | -0.107358986 | 0.328110995 | -0.327203258 | 0.743514157 | 0.843153577 |
| ENSG00000126581 | 330.8843349 | -0.022490049 | 0.105736682 | -0.21269864  | 0.831562027 | 0.901477895 |
| ENSG00000126583 | 43.66753869 | -1.077265669 | 0.278137531 | -3.873140261 | 0.000107442 | 0.000615011 |
| ENSG00000126602 | 2818.64278  | 0.40029948   | 0.057395958 | 6.974349668  | 3.07E-12    | 5.79E-11    |
| ENSG00000126603 | 425.2489628 | -0.123611302 | 0.104642347 | -1.181274177 | 0.237493822 | 0.398813799 |
| ENSG00000126653 | 931.165385  | 0.230239793  | 0.074806833 | 3.07779093   | 0.002085412 | 0.008459075 |
| ENSG00000126698 | 517.2617005 | 0.325098737  | 0.094685089 | 3.433473414  | 0.000595901 | 0.002834614 |
| ENSG00000126705 | 231.2971678 | 0.123080511  | 0.123856609 | 0.993733895  | 0.320352436 | 0.492017349 |
| ENSG00000126709 | 242.1776347 | 2.795971916  | 0.43707536  | 6.397001913  | 1.58E-10    | 2.44E-09    |
| ENSG00000126733 | 29.16691346 | 1.21673797   | 0.328440685 | 3.70458967   | 0.000211733 | 0.001127024 |
| ENSG00000126746 | 584.1468761 | 0.242364219  | 0.085875162 | 2.822285428  | 0.004768272 | 0.017192404 |
| ENSG00000126749 | 135.8598618 | -0.030040248 | 0.168590883 | -0.1781843   | 0.858578239 | 0.919311573 |
| ENSG00000126756 | 71.88008058 | 0.016646402  | 0.206568252 | 0.08058548   | 0.935771614 | 0.964731953 |
| ENSG00000126767 | 265.3857593 | 0.355263115  | 0.122333007 | 2.904065915  | 0.003683506 | 0.013768031 |
| ENSG00000126768 | 435.0856359 | 0.086765142  | 0.116577793 | 0.744268183  | 0.456714246 | 0.620271199 |
| ENSG00000126773 | 562.0353751 | -0.210867077 | 0.093207202 | -2.262347459 | 0.023675944 | 0.066235707 |
| ENSG00000126775 | 118.4903541 | -0.203918895 | 0.174702923 | -1.167232303 | 0.243116569 | 0.40603539  |
| ENSG00000126777 | 1593.384563 | 0.001913539  | 0.063199477 | 0.030277768  | 0.975845527 | 0.98780011  |
| ENSG00000126778 | 1292.648588 | -2.796715005 | 0.080834293 | -34.59812545 | 2.70E-262   | 2.70E-259   |
| ENSG00000126787 | 455.3309184 | 0.013659     | 0.092663847 | 0.147403761  | 0.882813337 | 0.935491773 |
| ENSG00000126790 | 61.65375157 | -0.002180653 | 0.232606509 | -0.009374857 | 0.992520056 | 0.996207876 |
| ENSG00000126804 | 265.4306692 | -0.301793965 | 0.118278137 | -2.551561696 | 0.010724134 | 0.034190173 |
| ENSG00000126814 | 127.6389681 | 0.225079966  | 0.16412762  | 1.371371659  | 0.170259128 | 0.313204553 |
| ENSG00000126821 | 117.1110527 | 0.265751725  | 0.173263752 | 1.533798741  | 0.125079173 | 0.24952252  |
| ENSG00000126822 | 235.740009  | 0.215687164  | 0.128370479 | 1.680192871  | 0.092919796 | 0.198244893 |
| ENSG00000126858 | 138.761909  | -0.244920203 | 0.16338355  | -1.499050565 | 0.133860515 | 0.262360632 |
| ENSG00000126870 | 559.6743995 | 0.306301106  | 0.090572966 | 3.381816021  | 0.000720084 | 0.003354897 |
| ENSG00000126878 | 180.3794393 | -0.442947266 | 0.140202323 | -3.159343272 | 0.001581251 | 0.006678243 |
| ENSG00000126882 | 463.710591  | 0.475722128  | 0.103109206 | 4.613769662  | 3.95E-06    | 3.10E-05    |
| ENSG00000126883 | 1550.458064 | 0.01244982   | 0.067770636 | 0.183705221  | 0.854244713 | 0.916431867 |
| ENSG00000126903 | 105.8355127 | 0.119097614  | 0.172173831 | 0.691728896  | 0.489107597 | 0.64895574  |
| ENSG00000126934 | 1031.838632 | 0.119452927  | 0.075774674 | 1.576422849  | 0.114928386 | 0.233699919 |
| ENSG00000126945 | 362.9994857 | -0.013551239 | 0.105675202 | -0.128234801 | 0.89796316  | 0.944497571 |
| ENSG00000126950 | 152.2118278 | 2.073837387  | 0.170587031 | 12.15706358  | 5.26E-34    | 3.28E-32    |
| ENSG00000126953 | 81.96423109 | 0.504295049  | 0.196387534 | 2.567856718  | 0.010232944 | 0.032930623 |
| ENSG00000126970 | 82.93471714 | 0.141259416  | 0.196135714 | 0.720212614  | 0.471394099 | 0.633289298 |
| ENSG00000127022 | 3562.83627  | 0.60102245   | 0.055655107 | 10.79905291  | 3.48E-27    | 1.68E-25    |
| ENSG00000127054 | 431.5365736 | 0.020122154  | 0.095603642 | 0.210474763  | 0.833297147 | 0.902386945 |
| ENSG00000127080 | 140.707056  | 0.215752586  | 0.164571148 | 1.310998855  | 0.189858151 | 0.339261855 |
| ENSG00000127081 | 97.37458425 | -0.349797523 | 0.183250369 | -1.908850308 | 0.056281405 | 0.133773595 |

|                 |             |              |             |              |             |             |
|-----------------|-------------|--------------|-------------|--------------|-------------|-------------|
| ENSG00000127084 | 23.92508253 | 0.228060586  | 0.347714993 | 0.655883671  | 0.511898975 | 0.667965156 |
| ENSG00000127124 | 183.9576163 | 0.219618746  | 0.140890212 | 1.5587935    | 0.119045263 | 0.240318445 |
| ENSG00000127125 | 170.3810627 | -0.12834114  | 0.139735586 | -0.918457092 | 0.358379613 | 0.529688386 |
| ENSG00000127184 | 1695.341089 | 0.318927541  | 0.077002187 | 4.14179847   | 3.45E-05    | 0.000219923 |
| ENSG00000127191 | 122.4245302 | -0.117398161 | 0.173268754 | -0.677549519 | 0.498057362 | 0.6560741   |
| ENSG00000127220 | 59.69516983 | -0.407765085 | 0.23204587  | -1.757260684 | 0.078873386 | 0.174560336 |
| ENSG00000127311 | 62.04344015 | 0.330856666  | 0.222804663 | 1.484962932  | 0.137553644 | 0.267397735 |
| ENSG00000127314 | 372.3453369 | 0.042238628  | 0.108830269 | 0.388114701  | 0.697931153 | 0.810339634 |
| ENSG00000127328 | 195.6089495 | 0.180129715  | 0.139522942 | 1.291040121  | 0.196689766 | 0.347928616 |
| ENSG00000127334 | 371.2763034 | 0.091954711  | 0.102868857 | 0.893902324  | 0.371374154 | 0.54217406  |
| ENSG00000127337 | 172.0287903 | 0.133438174  | 0.154995425 | 0.860916857  | 0.389283837 | 0.557731961 |
| ENSG00000127364 | 12.99984524 | 0.85912781   | 0.523683979 | 1.64054629   | 0.100891632 | 0.211116454 |
| ENSG00000127415 | 55.03146834 | 0.403294383  | 0.23482133  | 1.717452089  | 0.085896601 | 0.186547551 |
| ENSG00000127418 | 717.7243706 | 0.661429356  | 0.108382645 | 6.102723904  | 1.04E-09    | 1.45E-08    |
| ENSG00000127419 | 91.32488057 | 0.283484345  | 0.190890125 | 1.485065528  | 0.137526467 | 0.267381907 |
| ENSG00000127423 | 117.6026115 | -0.008951449 | 0.171934564 | -0.052063117 | 0.958478401 | 0.977701483 |
| ENSG00000127445 | 333.7327343 | 0.027409551  | 0.112215079 | 0.244259068  | 0.807030183 | 0.8858602   |
| ENSG00000127452 | 218.9018535 | 0.232228116  | 0.124445346 | 1.866105269  | 0.062026639 | 0.144636155 |
| ENSG00000127463 | 849.3788688 | 0.508341058  | 0.079361138 | 6.405415446  | 1.50E-10    | 2.32E-09    |
| ENSG00000127481 | 2776.127272 | -0.252239449 | 0.063640453 | -3.963508073 | 7.39E-05    | 0.000438117 |
| ENSG00000127483 | 1546.221724 | -0.12065644  | 0.064354497 | -1.874871935 | 0.060810344 | 0.142401179 |
| ENSG00000127507 | 44.11022662 | 0.712751596  | 0.273198395 | 2.608915752  | 0.00908296  | 0.029747806 |
| ENSG00000127511 | 403.1998922 | 0.237731723  | 0.098795062 | 2.406311794  | 0.016114505 | 0.048377955 |
| ENSG00000127526 | 364.3487437 | 0.326559625  | 0.106600384 | 3.063400071  | 0.002188373 | 0.00881815  |
| ENSG00000127527 | 385.0286369 | 0.113523615  | 0.105659736 | 1.074426444  | 0.282631596 | 0.452173323 |
| ENSG00000127528 | 19.23305968 | -0.018601372 | 0.403353193 | -0.046116833 | 0.96321713  | 0.980741593 |
| ENSG00000127540 | 87.02076497 | -0.069229409 | 0.192493651 | -0.359645155 | 0.719112511 | 0.825140781 |
| ENSG00000127554 | 161.6827184 | 0.160714968  | 0.145116736 | 1.107487476  | 0.268083224 | 0.435046794 |
| ENSG00000127561 | 44.63146558 | -0.003371321 | 0.260232245 | -0.012955049 | 0.989663656 | 0.994744093 |
| ENSG00000127564 | 204.9642268 | -0.106561574 | 0.130122627 | -0.818931931 | 0.412825251 | 0.581174213 |
| ENSG00000127580 | 35.41570824 | 0.774205065  | 0.29464578  | 2.627579003  | 0.008599487 | 0.028447185 |
| ENSG00000127585 | 11.96233567 | -0.500487572 | 0.500941002 | -0.999094843 | 0.317748749 | 0.489570766 |
| ENSG00000127586 | 189.4932667 | 0.044196555  | 0.152371218 | 0.290058421  | 0.771771544 | 0.86337203  |
| ENSG00000127603 | 2770.563378 | -0.33888384  | 0.065051973 | -5.209432148 | 1.89E-07    | 1.91E-06    |
| ENSG00000127616 | 4781.426127 | 0.198979861  | 0.052368881 | 3.799582052  | 0.00014494  | 0.000803781 |
| ENSG00000127663 | 381.0460029 | -0.061817766 | 0.101274594 | -0.610397568 | 0.541598479 | 0.691142874 |
| ENSG00000127666 | 124.9643155 | 0.659568082  | 0.163858197 | 4.025237032  | 5.69E-05    | 0.000345368 |
| ENSG00000127720 | 25.2237291  | 0.059486149  | 0.350196724 | 0.169864951  | 0.865116346 | 0.924195157 |
| ENSG00000127774 | 498.5509973 | -0.165961373 | 0.092102463 | -1.801921119 | 0.071557817 | 0.161765358 |
| ENSG00000127804 | 542.207118  | 0.17779588   | 0.090633746 | 1.961696259  | 0.049797858 | 0.121484979 |
| ENSG00000127824 | 28.1735343  | -0.04458635  | 0.346816624 | -0.128558861 | 0.89770672  | 0.944497571 |
| ENSG00000127837 | 634.0976566 | 0.372138132  | 0.083839831 | 4.438679427  | 9.05E-06    | 6.55E-05    |
| ENSG00000127838 | 355.9042245 | -0.216898176 | 0.102089026 | -2.124598342 | 0.033620142 | 0.088388946 |
| ENSG00000127870 | 489.5972526 | -0.01114336  | 0.095226693 | -0.117019285 | 0.906844771 | 0.950209129 |
| ENSG00000127884 | 336.4308728 | 0.351102189  | 0.107941605 | 3.252704902  | 0.001143121 | 0.005054274 |
| ENSG00000127903 | 10.47451245 | -1.065716024 | 0.55966113  | -1.904216619 | 0.056881978 | 0.13485589  |
| ENSG00000127914 | 1663.154105 | -0.006821759 | 0.067015112 | -0.101794343 | 0.918919916 | 0.955445452 |
| ENSG00000127922 | 411.8396679 | 0.168785436  | 0.112092209 | 1.505773126  | 0.132125424 | 0.259939193 |
| ENSG00000127946 | 672.5051613 | -0.037644075 | 0.084463153 | -0.445686358 | 0.65582382  | 0.779255389 |
| ENSG00000127947 | 456.857807  | 0.088840992  | 0.099807418 | 0.890124144  | 0.37339923  | 0.54353703  |

|                 |             |              |             |              |             |             |
|-----------------|-------------|--------------|-------------|--------------|-------------|-------------|
| ENSG00000127948 | 356.3289249 | 0.038092073  | 0.102243689 | 0.372561604  | 0.709474754 | 0.818158761 |
| ENSG00000127952 | 47.65732289 | -0.911626184 | 0.261923922 | -3.480499901 | 0.000500479 | 0.002425053 |
| ENSG00000127955 | 152.450153  | -0.202907068 | 0.147438782 | -1.376212319 | 0.168755909 | 0.311295372 |
| ENSG00000127980 | 218.2922492 | -0.191969864 | 0.128821461 | -1.490200951 | 0.136171406 | 0.265703534 |
| ENSG00000127989 | 63.80593936 | -0.036140366 | 0.219241816 | -0.164842486 | 0.869067963 | 0.927010226 |
| ENSG00000127993 | 88.31252446 | -0.175292029 | 0.190223996 | -0.921503242 | 0.356787749 | 0.528096127 |
| ENSG00000127995 | 72.28109054 | 0.174866056  | 0.210678275 | 0.830014652  | 0.4065305   | 0.574731675 |
| ENSG00000128000 | 67.96181908 | -0.399823456 | 0.234155094 | -1.707515517 | 0.087726276 | 0.189408392 |
| ENSG00000128011 | 118.9073829 | 0.17182908   | 0.166277909 | 1.033384897  | 0.301423812 | 0.471851946 |
| ENSG00000128016 | 759.1295129 | 0.014147563  | 0.100443382 | 0.14085112   | 0.887987558 | 0.938604531 |
| ENSG00000128039 | 28.39629822 | -0.509993449 | 0.333568945 | -1.528899665 | 0.126289319 | 0.251238688 |
| ENSG00000128050 | 1518.827436 | 0.135388255  | 0.072723581 | 1.861683011  | 0.062647785 | 0.145777036 |
| ENSG00000128059 | 300.3448643 | -0.055342925 | 0.115943262 | -0.477327657 | 0.63312882  | 0.762675631 |
| ENSG00000128159 | 173.1967462 | 0.040730937  | 0.145335114 | 0.280255304  | 0.77928164  | 0.868088632 |
| ENSG00000128185 | 54.43442463 | 0.052998958  | 0.239493251 | 0.221296248  | 0.824861771 | 0.897647452 |
| ENSG00000128191 | 316.0796305 | 0.052063265  | 0.115480983 | 0.450838432  | 0.652106    | 0.776439474 |
| ENSG00000128203 | 38.43711971 | 0.25099992   | 0.283512038 | 0.885323678  | 0.375982083 | 0.545883237 |
| ENSG00000128228 | 132.5972751 | 0.964590541  | 0.298914478 | 3.226978323  | 0.001251049 | 0.005459301 |
| ENSG00000128245 | 558.0034643 | -0.128982176 | 0.096157782 | -1.341359717 | 0.17980369  | 0.325817945 |
| ENSG00000128266 | 97.80397663 | -0.459247326 | 0.193465034 | -2.37380014  | 0.017606077 | 0.052076768 |
| ENSG00000128268 | 187.1585023 | -0.324453536 | 0.141255386 | -2.296928602 | 0.021622843 | 0.061534861 |
| ENSG00000128271 | 9.749966144 | -0.857801039 | 0.568412023 | -1.509118393 | 0.13126853  | 0.258615574 |
| ENSG00000128272 | 1498.114836 | -0.258674848 | 0.074482587 | -3.472957371 | 0.000514757 | 0.002484809 |
| ENSG00000128283 | 690.8791622 | 0.440664239  | 0.097294438 | 4.529182214  | 5.92E-06    | 4.48E-05    |
| ENSG00000128294 | 59.80538564 | -1.86E-05    | 0.225560355 | -8.25E-05    | 0.999934187 | 0.999954923 |
| ENSG00000128309 | 156.2518551 | -0.343367463 | 0.155525772 | -2.207784978 | 0.027259266 | 0.074525283 |
| ENSG00000128311 | 87.39421328 | -0.373988826 | 0.19699292  | -1.898488662 | 0.05763174  | 0.136219595 |
| ENSG00000128335 | 87.43060012 | 0.873519199  | 0.191609503 | 4.558851123  | 5.14E-06    | 3.93E-05    |
| ENSG00000128342 | 71.00644703 | -1.509605534 | 0.227696873 | -6.629891386 | 3.36E-11    | 5.63E-10    |
| ENSG00000128394 | 171.5013147 | -0.082191212 | 0.140301887 | -0.585816866 | 0.557998589 | 0.705122829 |
| ENSG00000128463 | 347.4978153 | 0.365886067  | 0.103940997 | 3.520132348  | 0.000431332 | 0.002122955 |
| ENSG00000128487 | 414.8461012 | 0.012882805  | 0.099118082 | 0.129974312  | 0.896586751 | 0.943962981 |
| ENSG00000128512 | 42.74064466 | 0.532687661  | 0.270367112 | 1.970238378  | 0.048811057 | 0.119690719 |
| ENSG00000128513 | 115.6450945 | 0.554673521  | 0.167460782 | 3.312259225  | 0.000925457 | 0.004198935 |
| ENSG00000128524 | 1177.027901 | 0.761267527  | 0.088631789 | 8.589102523  | 8.77E-18    | 2.57E-16    |
| ENSG00000128534 | 759.2184598 | 0.428949484  | 0.084205202 | 5.094097201  | 3.50E-07    | 3.39E-06    |
| ENSG00000128536 | 62.17418688 | 0.499807993  | 0.224240826 | 2.22888937   | 0.025821267 | 0.071259594 |
| ENSG00000128563 | 191.4934397 | 0.145660181  | 0.138695128 | 1.050218439  | 0.293617694 | 0.463987641 |
| ENSG00000128564 | 1565.891337 | -1.193720024 | 0.07587673  | -15.73235984 | 9.08E-56    | 1.11E-53    |
| ENSG00000128567 | 32.79836204 | 0.441147889  | 0.30907551  | 1.427314278  | 0.153489327 | 0.290105567 |
| ENSG00000128578 | 48.87046513 | -0.144720128 | 0.265174454 | -0.545754411 | 0.585234765 | 0.72718202  |
| ENSG00000128581 | 76.89356069 | -0.672294653 | 0.218105021 | -3.082435466 | 0.002053142 | 0.00834505  |
| ENSG00000128585 | 721.6309158 | 0.28046225   | 0.087825397 | 3.193407156  | 0.001406045 | 0.006041823 |
| ENSG00000128590 | 52.0128493  | 0.440894302  | 0.250664068 | 1.758905078  | 0.078593633 | 0.174105781 |
| ENSG00000128591 | 1994.858432 | 0.498724034  | 0.061275256 | 8.139077103  | 3.98E-16    | 1.05E-14    |
| ENSG00000128595 | 1861.442191 | 0.450885063  | 0.061290436 | 7.356532192  | 1.89E-13    | 4.05E-12    |
| ENSG00000128596 | 46.85123005 | 1.091513925  | 0.273197706 | 3.995326102  | 6.46E-05    | 0.000388489 |
| ENSG00000128602 | 345.8142912 | 0.709611636  | 0.111148843 | 6.384336671  | 1.72E-10    | 2.64E-09    |
| ENSG00000128606 | 8.309716679 | -0.188191812 | 0.609086157 | -0.308974042 | 0.757341273 | 0.853459515 |
| ENSG00000128607 | 167.932974  | -0.229868406 | 0.145574301 | -1.579045235 | 0.114325682 | 0.232642743 |

|                 |             |              |             |              |             |             |
|-----------------|-------------|--------------|-------------|--------------|-------------|-------------|
| ENSG00000128609 | 302.2882158 | 0.692070229  | 0.110553359 | 6.260056079  | 3.85E-10    | 5.67E-09    |
| ENSG00000128626 | 218.597372  | 0.20423118   | 0.132259952 | 1.544164927  | 0.122548383 | 0.246025031 |
| ENSG00000128641 | 68.29795907 | -0.935587688 | 0.2226907   | -4.201287654 | 2.65E-05    | 0.0001734   |
| ENSG00000128654 | 149.5575485 | -0.012798522 | 0.150217863 | -0.085199735 | 0.932102601 | 0.96324653  |
| ENSG00000128656 | 88.58961128 | -0.30513672  | 0.187584128 | -1.626665986 | 0.103808057 | 0.215867235 |
| ENSG00000128694 | 71.49906168 | 0.043420077  | 0.209355044 | 0.207399239  | 0.835698077 | 0.903907822 |
| ENSG00000128699 | 186.0701497 | 0.20952509   | 0.14162917  | 1.479392205  | 0.139035522 | 0.269644068 |
| ENSG00000128708 | 527.0990785 | 0.026772027  | 0.088111766 | 0.303841683  | 0.761248509 | 0.855734459 |
| ENSG00000128714 | 10.50211109 | -6.671558265 | 1.258483166 | -5.301269374 | 1.15E-07    | 1.20E-06    |
| ENSG00000128731 | 1056.17204  | -0.16358064  | 0.079312227 | -2.06248956  | 0.03916115  | 0.100105442 |
| ENSG00000128739 | 43.13690949 | 0.372485423  | 0.283292065 | 1.314845942  | 0.188561684 | 0.33746031  |
| ENSG00000128789 | 221.1122006 | -0.008313358 | 0.124501176 | -0.066773333 | 0.946762153 | 0.970529663 |
| ENSG00000128791 | 288.2000924 | 0.003818338  | 0.111797634 | 0.034154012  | 0.972754338 | 0.986075028 |
| ENSG00000128805 | 91.35865578 | 0.804450808  | 0.191381094 | 4.203397468  | 2.63E-05    | 0.000172352 |
| ENSG00000128829 | 1275.185702 | 0.228922188  | 0.072067361 | 3.176502976  | 0.001490623 | 0.006358571 |
| ENSG00000128833 | 38.99223126 | -0.688339917 | 0.29160472  | -2.360523922 | 0.018249141 | 0.053617588 |
| ENSG00000128872 | 148.2194316 | 0.274513987  | 0.152139915 | 1.804352179  | 0.071176115 | 0.161111762 |
| ENSG00000128881 | 260.8552451 | -0.4525009   | 0.119213638 | -3.7957142   | 0.000147219 | 0.000814475 |
| ENSG00000128891 | 75.32750922 | -0.303923344 | 0.21923106  | -1.386315169 | 0.165650687 | 0.307221442 |
| ENSG00000128908 | 676.87503   | -0.038771982 | 0.088889761 | -0.436180516 | 0.662705763 | 0.784604829 |
| ENSG00000128915 | 286.3559225 | 0.164534606  | 0.11065687  | 1.486890107  | 0.137043838 | 0.266735479 |
| ENSG00000128918 | 16.8128748  | -0.559724034 | 0.440042246 | -1.271977949 | 0.203380954 | 0.35635428  |
| ENSG00000128923 | 436.1916449 | 0.031688854  | 0.103780028 | 0.305346361  | 0.76010237  | 0.85522874  |
| ENSG00000128928 | 367.4056881 | -0.182356348 | 0.102964645 | -1.771057895 | 0.076551075 | 0.170387093 |
| ENSG00000128944 | 308.5886262 | 0.066075185  | 0.120170464 | 0.54984547   | 0.582425368 | 0.724652715 |
| ENSG00000128951 | 348.187623  | 0.170600778  | 0.11560116  | 1.475770463  | 0.140005523 | 0.270926791 |
| ENSG00000128965 | 167.0005035 | -1.459466954 | 0.317403383 | -4.598145551 | 4.26E-06    | 3.30E-05    |
| ENSG00000128973 | 157.4278695 | 0.113673333  | 0.143450849 | 0.792420081  | 0.428115774 | 0.595302146 |
| ENSG00000128989 | 1181.428113 | -0.199336467 | 0.070191193 | -2.839907089 | 0.004512668 | 0.016405135 |
| ENSG00000129003 | 299.1065682 | 1.5298745    | 0.114252865 | 13.3902506   | 6.89E-41    | 5.57E-39    |
| ENSG00000129007 | 20.81794399 | 0.068791894  | 0.372362651 | 0.184744344  | 0.853429563 | 0.916032577 |
| ENSG00000129028 | 21.29057298 | -0.21087164  | 0.388688594 | -0.542520782 | 0.587459795 | 0.729379663 |
| ENSG00000129055 | 205.1171489 | 0.256455602  | 0.133172489 | 1.925740104  | 0.054136834 | 0.129771349 |
| ENSG00000129071 | 120.503584  | -0.163770496 | 0.166944056 | -0.980990282 | 0.326597534 | 0.498773164 |
| ENSG00000129083 | 509.4139602 | 0.238068409  | 0.090539663 | 2.62943775   | 0.008552619 | 0.028341268 |
| ENSG00000129084 | 105.2608324 | 0.36318837   | 0.176920619 | 2.052832349  | 0.04008884  | 0.101978981 |
| ENSG00000129103 | 598.0311417 | 0.23950602   | 0.089764062 | 2.668172702  | 0.007626504 | 0.02569053  |
| ENSG00000129116 | 199.3139591 | -0.172012947 | 0.134335216 | -1.280475454 | 0.200377972 | 0.352543759 |
| ENSG00000129128 | 445.9263869 | 0.354919281  | 0.098752145 | 3.594041245  | 0.000325588 | 0.001652887 |
| ENSG00000129158 | 100.3629665 | 0.593278402  | 0.184739478 | 3.211432704  | 0.001320749 | 0.005719039 |
| ENSG00000129173 | 196.5132843 | 0.668467742  | 0.137657999 | 4.85600364   | 1.20E-06    | 1.04E-05    |
| ENSG00000129187 | 410.4474449 | 0.335500731  | 0.097619129 | 3.436833903  | 0.000588556 | 0.002803476 |
| ENSG00000129195 | 174.6605837 | 0.125352581  | 0.138877062 | 0.902615441  | 0.366730029 | 0.538011145 |
| ENSG00000129197 | 350.0575162 | -0.0672487   | 0.103512296 | -0.649668713 | 0.515906238 | 0.671096242 |
| ENSG00000129219 | 54.62807644 | -0.729493985 | 0.246669526 | -2.957373761 | 0.003102718 | 0.011882191 |
| ENSG00000129235 | 588.6307675 | 0.168299916  | 0.093213743 | 1.805526854  | 0.070992277 | 0.160817371 |
| ENSG00000129244 | 113.4555181 | -2.769379371 | 0.217549007 | -12.7299104  | 4.03E-37    | 2.82E-35    |
| ENSG00000129245 | 640.2843687 | 0.315183879  | 0.084958158 | 3.709871829  | 0.000207364 | 0.001105864 |
| ENSG00000129250 | 1414.17499  | 0.390731672  | 0.073053575 | 5.34856334   | 8.87E-08    | 9.41E-07    |
| ENSG00000129255 | 361.0600318 | 0.068514831  | 0.108070244 | 0.633984233  | 0.526091112 | 0.679290546 |



|                 |             |              |             |              |             |             |
|-----------------|-------------|--------------|-------------|--------------|-------------|-------------|
| ENSG00000129292 | 442.0165191 | 0.235341891  | 0.098417593 | 2.391258342  | 0.016790733 | 0.050065683 |
| ENSG00000129315 | 463.8854883 | -0.105181242 | 0.096986558 | -1.084492991 | 0.278146273 | 0.446987839 |
| ENSG00000129317 | 285.0927472 | -0.067369571 | 0.113287447 | -0.594678167 | 0.552058619 | 0.699491764 |
| ENSG00000129347 | 693.434998  | -0.250874132 | 0.084140653 | -2.981604312 | 0.002867423 | 0.011114431 |
| ENSG00000129351 | 4880.763582 | 0.054980106  | 0.057458681 | 0.956863346  | 0.338636234 | 0.510520298 |
| ENSG00000129353 | 61.45304374 | -2.460773808 | 0.270614127 | -9.093293982 | 9.61E-20    | 3.21E-18    |
| ENSG00000129354 | 18.36122905 | -0.402823349 | 0.41466788  | -0.971436103 | 0.331331157 | 0.503811298 |
| ENSG00000129355 | 28.50633291 | -0.025073133 | 0.323241354 | -0.077567837 | 0.938171827 | 0.966102042 |
| ENSG00000129422 | 341.6233434 | -1.965548355 | 0.117810707 | -16.68395347 | 1.71E-62    | 2.43E-60    |
| ENSG00000129460 | 207.5664443 | 0.051794936  | 0.129865342 | 0.39883571   | 0.690014263 | 0.804902039 |
| ENSG00000129472 | 110.1051256 | 0.199952054  | 0.173417122 | 1.153012178  | 0.248905386 | 0.413038861 |
| ENSG00000129473 | 179.1503661 | 0.439661469  | 0.136326591 | 3.225060246  | 0.001259462 | 0.005490893 |
| ENSG00000129474 | 121.4222126 | -0.236234185 | 0.176003318 | -1.342214383 | 0.179526494 | 0.325436658 |
| ENSG00000129480 | 66.39158059 | -0.203072965 | 0.228021877 | -0.890585447 | 0.373151609 | 0.54340148  |
| ENSG00000129484 | 252.5765494 | 0.261851879  | 0.120457603 | 2.173809483  | 0.029719446 | 0.079898384 |
| ENSG00000129493 | 105.5376175 | -0.031425835 | 0.179219005 | -0.175348785 | 0.860805581 | 0.920854161 |
| ENSG00000129514 | 28.23925962 | 0.943830036  | 0.330887714 | 2.852417897  | 0.004338802 | 0.015867522 |
| ENSG00000129515 | 265.1626427 | 0.510633674  | 0.117716377 | 4.337830375  | 1.44E-05    | 9.98E-05    |
| ENSG00000129518 | 100.3235869 | 0.25675845   | 0.192146015 | 1.336267367  | 0.181461899 | 0.328098248 |
| ENSG00000129534 | 238.1903902 | -0.239934412 | 0.121374706 | -1.976807359 | 0.04806341  | 0.118322242 |
| ENSG00000129559 | 166.3197019 | 0.232226192  | 0.146813509 | 1.581776726  | 0.11370055  | 0.231768071 |
| ENSG00000129562 | 344.5583267 | 0.317179523  | 0.115338021 | 2.749999694  | 0.005959532 | 0.020726305 |
| ENSG00000129566 | 106.2341509 | -0.545759443 | 0.179329    | -3.043341805 | 0.002339664 | 0.009336722 |
| ENSG00000129596 | 34.98079471 | -0.126676306 | 0.292112299 | -0.433656188 | 0.664538126 | 0.785491334 |
| ENSG00000129625 | 536.4191679 | 0.32946136   | 0.094671836 | 3.480035585  | 0.000501347 | 0.002428175 |
| ENSG00000129636 | 307.7062212 | 0.176288493  | 0.121150214 | 1.455123243  | 0.145635146 | 0.278900735 |
| ENSG00000129646 | 114.8529765 | -0.115692765 | 0.188325139 | -0.614324593 | 0.539000855 | 0.689580557 |
| ENSG00000129657 | 899.4614373 | 0.497298866  | 0.075629494 | 6.575462001  | 4.85E-11    | 8.03E-10    |
| ENSG00000129667 | 154.9680936 | 0.062821708  | 0.144300867 | 0.435352259  | 0.663306758 | 0.784755231 |
| ENSG00000129675 | 83.31870112 | 1.004847138  | 0.198463227 | 5.06314018   | 4.12E-07    | 3.95E-06    |
| ENSG00000129680 | 583.0341979 | 0.179371217  | 0.091811006 | 1.953700593  | 0.050736636 | 0.123236319 |
| ENSG00000129691 | 289.9414755 | -0.278778293 | 0.12062611  | -2.311094109 | 0.020827657 | 0.059707368 |
| ENSG00000129696 | 84.56903576 | 0.116409617  | 0.192092607 | 0.606007796  | 0.544509576 | 0.693258952 |
| ENSG00000129757 | 40.14701445 | -0.109738928 | 0.27527533  | -0.398651517 | 0.690149996 | 0.804993523 |
| ENSG00000129810 | 224.3500211 | -0.096248506 | 0.131602444 | -0.731358048 | 0.464560483 | 0.627348693 |
| ENSG00000129911 | 343.1761706 | 0.033017079  | 0.130706608 | 0.252604514  | 0.800573842 | 0.880976166 |
| ENSG00000129925 | 441.5672216 | -0.034728154 | 0.094460429 | -0.367647647 | 0.713135982 | 0.820898233 |
| ENSG00000129932 | 184.3165756 | 0.119110162  | 0.138192084 | 0.861917405  | 0.38873297  | 0.557259172 |
| ENSG00000129933 | 421.4361917 | 0.228360256  | 0.09543158  | 2.392921252  | 0.016714828 | 0.049881706 |
| ENSG00000129951 | 126.2770269 | -0.454785848 | 0.162370704 | -2.800910741 | 0.005095861 | 0.018181753 |
| ENSG00000129968 | 83.46117092 | 0.041240007  | 0.191428571 | 0.215432872  | 0.829429843 | 0.9003169   |
| ENSG00000129990 | 256.7372329 | 0.103259641  | 0.118561063 | 0.870940581  | 0.383786598 | 0.552984956 |
| ENSG00000129991 | 45.93033689 | 0.417497169  | 0.261631639 | 1.59574419   | 0.110545918 | 0.226791078 |
| ENSG00000129993 | 14.37303235 | -2.174434049 | 0.571943479 | -3.801833798 | 0.000143629 | 0.000797769 |
| ENSG00000130005 | 263.1755203 | -0.327610878 | 0.116111253 | -2.821525641 | 0.004779582 | 0.017228325 |
| ENSG00000130021 | 119.5287654 | -0.277751011 | 0.163127989 | -1.702656992 | 0.088632278 | 0.190982912 |
| ENSG00000130023 | 46.98601091 | 0.169100539  | 0.267720514 | 0.631630859  | 0.527628117 | 0.680524484 |
| ENSG00000130024 | 480.1962439 | 0.187587915  | 0.090961518 | 2.062277751  | 0.0391813   | 0.100105442 |
| ENSG00000130052 | 28.42247314 | -0.482934193 | 0.333600674 | -1.447641535 | 0.147717329 | 0.281855101 |
| ENSG00000130054 | 80.04626347 | -1.268312716 | 0.209275668 | -6.060488187 | 1.36E-09    | 1.86E-08    |

|                 |             |              |             |              |             |             |
|-----------------|-------------|--------------|-------------|--------------|-------------|-------------|
| ENSG00000130066 | 66.8581703  | -0.154688996 | 0.230590844 | -0.670837544 | 0.502324027 | 0.660436748 |
| ENSG00000130119 | 1144.531312 | 0.099282996  | 0.073938785 | 1.342772893  | 0.179345523 | 0.325192535 |
| ENSG00000130147 | 129.4166919 | 0.018381174  | 0.161523431 | 0.113798811  | 0.909397281 | 0.951381168 |
| ENSG00000130150 | 67.0934186  | 0.503787564  | 0.212698724 | 2.368550006  | 0.017857966 | 0.05265551  |
| ENSG00000130158 | 226.802369  | -0.182553965 | 0.123413648 | -1.479204024 | 0.139085794 | 0.269667102 |
| ENSG00000130159 | 369.3743706 | 0.160732742  | 0.105278892 | 1.526732838  | 0.126827458 | 0.252037117 |
| ENSG00000130164 | 1812.586625 | 0.338642387  | 0.067583987 | 5.010689692  | 5.42E-07    | 5.10E-06    |
| ENSG00000130165 | 282.5218381 | 0.145140156  | 0.127935474 | 1.134479364  | 0.256593525 | 0.422354024 |
| ENSG00000130175 | 3791.871261 | 0.225009691  | 0.074202694 | 3.032365539  | 0.002426452 | 0.009634833 |
| ENSG00000130176 | 48.10832829 | -1.522954929 | 0.273920275 | -5.559847406 | 2.70E-08    | 3.11E-07    |
| ENSG00000130177 | 270.4036896 | 0.370972626  | 0.117806921 | 3.148988385  | 0.001638367 | 0.006892525 |
| ENSG00000130193 | 281.0518858 | 0.385472248  | 0.12200491  | 3.15948144   | 0.001580502 | 0.006677085 |
| ENSG00000130202 | 548.3806266 | -0.057421097 | 0.086911608 | -0.660683862 | 0.508815075 | 0.665497779 |
| ENSG00000130203 | 1438.474186 | -3.624005968 | 0.087058062 | -41.62745985 | 0           | 0           |
| ENSG00000130204 | 1262.05669  | 0.014486717  | 0.069088881 | 0.209682315  | 0.83391563  | 0.902721285 |
| ENSG00000130208 | 81.71880056 | -1.165498347 | 0.226255206 | -5.151255385 | 2.59E-07    | 2.56E-06    |
| ENSG00000130227 | 856.1348396 | 0.179119588  | 0.083174837 | 2.153530983  | 0.031276972 | 0.083272862 |
| ENSG00000130244 | 79.50339875 | 0.078739157  | 0.202899149 | 0.388070418  | 0.697963923 | 0.810339634 |
| ENSG00000130254 | 1083.682647 | 0.027494956  | 0.074940164 | 0.366892123  | 0.713699487 | 0.821479572 |
| ENSG00000130255 | 7866.175012 | 0.373977494  | 0.060391333 | 6.192568915  | 5.92E-10    | 8.52E-09    |
| ENSG00000130270 | 63.83422302 | -0.439410046 | 0.227306848 | -1.933113983 | 0.053222158 | 0.128037618 |
| ENSG00000130294 | 90.68730083 | 0.654307272  | 0.190830407 | 3.428736981  | 0.000606397 | 0.00287675  |
| ENSG00000130299 | 252.9208722 | 0.297847373  | 0.151438922 | 1.966782177  | 0.049208328 | 0.120339378 |
| ENSG00000130303 | 1257.666451 | 1.714188046  | 0.158626918 | 10.80641334  | 3.21E-27    | 1.56E-25    |
| ENSG00000130304 | 82.18421197 | -0.416200378 | 0.198161356 | -2.1003105   | 0.035701536 | 0.092956345 |
| ENSG00000130305 | 136.331716  | 0.09898284   | 0.168237431 | 0.588352064  | 0.556296006 | 0.703356436 |
| ENSG00000130309 | 664.014738  | 0.193239907  | 0.082580262 | 2.34002536   | 0.019282431 | 0.056035852 |
| ENSG00000130311 | 341.2391415 | 0.119147218  | 0.105221711 | 1.132344427  | 0.257489659 | 0.423283469 |
| ENSG00000130312 | 450.5156142 | 0.072312338  | 0.097736712 | 0.739868737  | 0.459379646 | 0.622670717 |
| ENSG00000130313 | 221.760654  | 0.088479844  | 0.126902578 | 0.697226528  | 0.48566104  | 0.646030363 |
| ENSG00000130332 | 350.3956495 | 0.537537412  | 0.109177442 | 4.923520849  | 8.50E-07    | 7.64E-06    |
| ENSG00000130338 | 759.203503  | -0.081618515 | 0.080248898 | -1.017067105 | 0.309121508 | 0.480282028 |
| ENSG00000130340 | 526.2840901 | 0.24757945   | 0.091428045 | 2.70791582   | 0.006770719 | 0.023129449 |
| ENSG00000130347 | 35.30398081 | 0.070863453  | 0.304921794 | 0.232398781  | 0.816228296 | 0.89198373  |
| ENSG00000130348 | 163.7065998 | 0.195911186  | 0.146742399 | 1.335068716  | 0.181853857 | 0.328680022 |
| ENSG00000130349 | 144.5006896 | 0.15577      | 0.15841401  | 0.983309495  | 0.325455139 | 0.497569474 |
| ENSG00000130363 | 173.6331449 | 0.168446379  | 0.13912184  | 1.210783152  | 0.225978524 | 0.384346812 |
| ENSG00000130382 | 342.2476254 | -0.927851317 | 0.112599182 | -8.240302484 | 1.72E-16    | 4.60E-15    |
| ENSG00000130396 | 700.4414473 | 0.101736766  | 0.088401964 | 1.150842824  | 0.249796903 | 0.413789489 |
| ENSG00000130402 | 2265.242136 | 0.323697961  | 0.061177463 | 5.291130836  | 1.22E-07    | 1.26E-06    |
| ENSG00000130413 | 47.47119924 | -0.110846688 | 0.251902336 | -0.44003835  | 0.659909332 | 0.782521221 |
| ENSG00000130414 | 835.1514226 | -0.003889089 | 0.078165132 | -0.04975478  | 0.960317802 | 0.978924831 |
| ENSG00000130429 | 95.13180988 | 0.083325007  | 0.188815618 | 0.441303575  | 0.658993238 | 0.781764886 |
| ENSG00000130449 | 194.0830642 | 0.011773577  | 0.136209111 | 0.086437513  | 0.931118628 | 0.962642479 |
| ENSG00000130475 | 245.9643393 | 0.05073822   | 0.123621173 | 0.41043309   | 0.681488277 | 0.798400454 |
| ENSG00000130477 | 1492.516695 | -0.032967031 | 0.066929275 | -0.492565193 | 0.622319847 | 0.754963891 |
| ENSG00000130479 | 331.2565428 | 0.175276891  | 0.12829572  | 1.36619437   | 0.171877964 | 0.315099944 |
| ENSG00000130511 | 585.4602472 | 0.253391373  | 0.110715079 | 2.288679875  | 0.022097959 | 0.062572074 |
| ENSG00000130513 | 79.38792976 | -1.360427955 | 0.215088286 | -6.324974648 | 2.53E-10    | 3.80E-09    |
| ENSG00000130517 | 174.214394  | -0.395770521 | 0.145403789 | -2.721872131 | 0.006491325 | 0.022305198 |

|                 |             |              |             |              |             |             |
|-----------------|-------------|--------------|-------------|--------------|-------------|-------------|
| ENSG00000130518 | 71.39645606 | -1.165643938 | 0.223920325 | -5.205619171 | 1.93E-07    | 1.94E-06    |
| ENSG00000130520 | 980.3216973 | -0.078048943 | 0.072158345 | -1.081634325 | 0.279415046 | 0.448121697 |
| ENSG00000130522 | 643.1390144 | 0.19252199   | 0.095724219 | 2.011215058  | 0.044302746 | 0.110871312 |
| ENSG00000130528 | 93.78400354 | -2.129638789 | 0.215766747 | -9.870097297 | 5.61E-23    | 2.20E-21    |
| ENSG00000130529 | 122.0044839 | -0.236609607 | 0.191917519 | -1.232871329 | 0.217623774 | 0.374627592 |
| ENSG00000130540 | 98.33859655 | 0.131222525  | 0.177089109 | 0.74099715   | 0.458695168 | 0.622312879 |
| ENSG00000130544 | 158.0500744 | 0.297714292  | 0.147761657 | 2.014827789  | 0.043922696 | 0.110304062 |
| ENSG00000130559 | 653.140056  | 0.133559469  | 0.081617441 | 1.636408425  | 0.101754137 | 0.212572927 |
| ENSG00000130560 | 250.2806801 | 0.020689508  | 0.120634727 | 0.171505407  | 0.863826379 | 0.923031275 |
| ENSG00000130584 | 104.9885223 | 0.639533416  | 0.175109719 | 3.652186867  | 0.000260017 | 0.001352259 |
| ENSG00000130589 | 52.35722231 | 6.869777194  | 0.859035174 | 7.997084872  | 1.27E-15    | 3.24E-14    |
| ENSG00000130590 | 37.93047926 | 0.429295201  | 0.281841614 | 1.523178906  | 0.127713952 | 0.253032141 |
| ENSG00000130635 | 21.85550016 | -2.949668343 | 0.494907597 | -5.960038529 | 2.52E-09    | 3.34E-08    |
| ENSG00000130638 | 315.5379774 | 0.046832671  | 0.109027993 | 0.429547218  | 0.667525039 | 0.787430654 |
| ENSG00000130640 | 407.5433006 | 0.153358859  | 0.096899367 | 1.582661098  | 0.11349873  | 0.231462929 |
| ENSG00000130643 | 66.88357326 | -1.759795808 | 0.249331486 | -7.058056879 | 1.69E-12    | 3.29E-11    |
| ENSG00000130649 | 12.10252011 | -2.377050591 | 0.595435872 | -3.992118554 | 6.55E-05    | 0.000392774 |
| ENSG00000130653 | 18.55065215 | -0.285465047 | 0.417220414 | -0.684206806 | 0.493844585 | 0.653081801 |
| ENSG00000130669 | 381.2311916 | 0.503724968  | 0.101337935 | 4.970744334  | 6.67E-07    | 6.15E-06    |
| ENSG00000130684 | 193.9763468 | -0.068079984 | 0.146876256 | -0.463519327 | 0.642992165 | 0.769607271 |
| ENSG00000130695 | 355.3640183 | -0.265636723 | 0.104664334 | -2.537987023 | 0.011149212 | 0.035376774 |
| ENSG00000130699 | 322.5207325 | -0.003587208 | 0.107908368 | -0.033243095 | 0.973480732 | 0.986330341 |
| ENSG00000130700 | 56.87756439 | -0.025105695 | 0.23529106  | -0.106700589 | 0.915026516 | 0.954010055 |
| ENSG00000130702 | 1060.921607 | -0.235005768 | 0.093322293 | -2.518216814 | 0.011795069 | 0.037099269 |
| ENSG00000130703 | 320.9556864 | -0.160248399 | 0.108084728 | -1.482618328 | 0.138175845 | 0.26827313  |
| ENSG00000130706 | 912.8037304 | 0.804437572  | 0.078562951 | 10.2394011   | 1.32E-24    | 5.71E-23    |
| ENSG00000130707 | 38.31619786 | 0.216823643  | 0.286274669 | 0.757397236  | 0.448811912 | 0.613811793 |
| ENSG00000130713 | 440.9571091 | 0.129307101  | 0.096739333 | 1.336654878  | 0.181335317 | 0.327968244 |
| ENSG00000130714 | 292.4101537 | 0.394220903  | 0.124467989 | 3.167247315  | 0.001538894 | 0.006527844 |
| ENSG00000130717 | 134.0478958 | 0.11274988   | 0.154993428 | 0.727449421  | 0.466950689 | 0.629185259 |
| ENSG00000130724 | 461.9200101 | 0.170077553  | 0.09313387  | 1.826162188  | 0.067825835 | 0.155348036 |
| ENSG00000130725 | 544.9493633 | 0.32736253   | 0.093358032 | 3.506527738  | 0.000453994 | 0.002221907 |
| ENSG00000130726 | 1688.178384 | 0.280348963  | 0.075155363 | 3.73025892   | 0.000191283 | 0.001026338 |
| ENSG00000130731 | 440.1056338 | 0.369680863  | 0.097435551 | 3.794106551  | 0.000148176 | 0.000819138 |
| ENSG00000130733 | 186.9586998 | 0.717214722  | 0.143683924 | 4.991614241  | 5.99E-07    | 5.57E-06    |
| ENSG00000130734 | 71.72130839 | 0.037484832  | 0.230812364 | 0.162403919  | 0.870987785 | 0.928186766 |
| ENSG00000130741 | 2241.633249 | 0.273944437  | 0.060639094 | 4.517620893  | 6.25E-06    | 4.69E-05    |
| ENSG00000130748 | 137.9041546 | -0.161650306 | 0.168520491 | -0.959232346 | 0.337441709 | 0.509394358 |
| ENSG00000130749 | 910.3294395 | 0.003345893  | 0.081016658 | 0.041298822  | 0.967057672 | 0.982799821 |
| ENSG00000130751 | 118.910716  | 0.755894745  | 0.18177161  | 4.158486281  | 3.20E-05    | 0.000206051 |
| ENSG00000130758 | 92.3864225  | 0.092772535  | 0.194113433 | 0.477929493  | 0.632700389 | 0.762290279 |
| ENSG00000130762 | 34.52132282 | 0.65808516   | 0.308578235 | 2.132636347  | 0.032954569 | 0.086948316 |
| ENSG00000130764 | 330.6125242 | 0.413353262  | 0.108542664 | 3.808210031  | 0.000139976 | 0.000779021 |
| ENSG00000130766 | 330.5994622 | -0.320561177 | 0.116073755 | -2.761702493 | 0.005750085 | 0.020102399 |
| ENSG00000130768 | 38.08349555 | 0.489171898  | 0.282664    | 1.730577285  | 0.083527186 | 0.182769687 |
| ENSG00000130770 | 2208.226994 | -0.119292453 | 0.061955891 | -1.925441663 | 0.054174128 | 0.129838589 |
| ENSG00000130772 | 42.58616825 | -0.103634921 | 0.273291029 | -0.379210839 | 0.704531303 | 0.814832908 |
| ENSG00000130775 | 58.12050897 | -0.170021406 | 0.229815942 | -0.739815545 | 0.459411925 | 0.622670717 |
| ENSG00000130779 | 822.2092027 | -0.459153746 | 0.079080011 | -5.806192273 | 6.39E-09    | 8.09E-08    |
| ENSG00000130783 | 16.36962773 | 0.282972582  | 0.430824733 | 0.656816009  | 0.511299229 | 0.66749259  |

|                 |             |              |             |              |             |             |
|-----------------|-------------|--------------|-------------|--------------|-------------|-------------|
| ENSG00000130787 | 222.0357949 | 0.101151581  | 0.123771859 | 0.817242155  | 0.413790056 | 0.582182384 |
| ENSG00000130803 | 388.6500218 | -0.010528573 | 0.101818774 | -0.103405029 | 0.917641521 | 0.955355281 |
| ENSG00000130810 | 143.0962809 | 0.295818609  | 0.151642374 | 1.950764824  | 0.051085028 | 0.123851999 |
| ENSG00000130811 | 605.2098042 | 0.268690859  | 0.087974206 | 3.054200458  | 0.002256612 | 0.009061931 |
| ENSG00000130813 | 52.37126873 | 0.815401163  | 0.245770345 | 3.317736169  | 0.000907502 | 0.004124126 |
| ENSG00000130816 | 2403.718992 | 0.113143991  | 0.059759551 | 1.89332063   | 0.058315243 | 0.137556569 |
| ENSG00000130821 | 867.2303162 | 1.451141568  | 0.078569131 | 18.46961465  | 3.63E-76    | 6.21E-74    |
| ENSG00000130826 | 833.940083  | 0.119299543  | 0.080843524 | 1.475684595  | 0.140028583 | 0.270934092 |
| ENSG00000130827 | 336.428093  | 0.132449192  | 0.1090902   | 1.214125478  | 0.224699812 | 0.382809194 |
| ENSG00000130829 | 105.2202109 | 0.608833402  | 0.176692711 | 3.445718829  | 0.000569543 | 0.002719363 |
| ENSG00000130830 | 79.96259579 | -0.092164226 | 0.202051303 | -0.456142697 | 0.648287368 | 0.77370371  |
| ENSG00000130844 | 165.4155935 | 0.237821292  | 0.149872341 | 1.586825768  | 0.112552111 | 0.229999928 |
| ENSG00000130856 | 400.5084902 | 0.369972108  | 0.101422404 | 3.647834148  | 0.00026446  | 0.001373825 |
| ENSG00000130876 | 9.308862544 | -2.770175565 | 0.721115576 | -3.841513976 | 0.000122278 | 0.000690924 |
| ENSG00000130881 | 184.7830841 | 0.096758643  | 0.141867576 | 0.682034934  | 0.495216861 | 0.654135261 |
| ENSG00000130921 | 122.3379164 | -0.453246723 | 0.167611412 | -2.704151928 | 0.006847897 | 0.023359012 |
| ENSG00000130935 | 555.4395694 | 0.052975799  | 0.093508974 | 0.566531708  | 0.571032384 | 0.716186777 |
| ENSG00000130939 | 959.6960286 | -0.148090129 | 0.080059246 | -1.849756728 | 0.06434862  | 0.14891352  |
| ENSG00000130940 | 13.3055514  | -0.41040544  | 0.483256761 | -0.849249246 | 0.395742616 | 0.563477628 |
| ENSG00000130956 | 342.936213  | 0.432437055  | 0.104224922 | 4.149075369  | 3.34E-05    | 0.00021402  |
| ENSG00000130958 | 36.76796323 | 0.178335819  | 0.294876493 | 0.604781403  | 0.545324252 | 0.693981678 |
| ENSG00000130962 | 89.19627879 | -0.196947401 | 0.203071449 | -0.969842893 | 0.332124809 | 0.50452657  |
| ENSG00000130985 | 3924.869056 | -0.044184857 | 0.069587904 | -0.634950248 | 0.525460864 | 0.678663916 |
| ENSG00000131013 | 248.0321578 | 0.139713731  | 0.118271342 | 1.181298261  | 0.237484258 | 0.398813799 |
| ENSG00000131016 | 3857.234793 | 0.703573399  | 0.058838925 | 11.95761823  | 5.92E-33    | 3.57E-31    |
| ENSG00000131018 | 816.3343112 | 1.460596318  | 0.085962925 | 16.99100309  | 9.57E-65    | 1.40E-62    |
| ENSG00000131019 | 22.35144812 | 0.579019864  | 0.369427729 | 1.567342727  | 0.117034603 | 0.236885457 |
| ENSG00000131023 | 592.5045186 | -0.213744817 | 0.085895323 | -2.488433704 | 0.012830716 | 0.039892223 |
| ENSG00000131037 | 61.16295146 | -0.617263181 | 0.244298162 | -2.5266796   | 0.01151465  | 0.036372    |
| ENSG00000131043 | 169.8691615 | 0.024245499  | 0.138915475 | 0.174534181  | 0.86144567  | 0.921258267 |
| ENSG00000131051 | 1553.473415 | -0.002461881 | 0.069644042 | -0.035349484 | 0.971801065 | 0.985302874 |
| ENSG00000131061 | 128.4656647 | 0.745538946  | 0.159777381 | 4.666110702  | 3.07E-06    | 2.45E-05    |
| ENSG00000131067 | 225.4925237 | 0.476601286  | 0.131346344 | 3.628584333  | 0.00028498  | 0.00146957  |
| ENSG00000131069 | 638.5915778 | -0.381140045 | 0.098420733 | -3.872558495 | 0.000107699 | 0.000615979 |
| ENSG00000131080 | 108.4238742 | -0.260807183 | 0.170553546 | -1.529180658 | 0.126219664 | 0.251169801 |
| ENSG00000131089 | 219.0604307 | -0.211402293 | 0.125467015 | -1.68492327  | 0.092003376 | 0.196678044 |
| ENSG00000131094 | 80.89631039 | -0.825562227 | 0.210362102 | -3.924481732 | 8.69E-05    | 0.000507447 |
| ENSG00000131100 | 608.1369588 | -0.131684025 | 0.083677483 | -1.573709197 | 0.115554695 | 0.234516753 |
| ENSG00000131115 | 159.1373445 | 0.597524168  | 0.148949497 | 4.011589017  | 6.03E-05    | 0.000363759 |
| ENSG00000131116 | 143.987386  | 0.269929421  | 0.157428949 | 1.714611081  | 0.086416556 | 0.187453484 |
| ENSG00000131143 | 1986.207602 | 0.226275142  | 0.07173298  | 3.154408772  | 0.001608237 | 0.006784053 |
| ENSG00000131148 | 200.6301357 | 0.053019541  | 0.131042208 | 0.404598956  | 0.685772326 | 0.801843308 |
| ENSG00000131149 | 1288.441341 | -0.244783687 | 0.068995363 | -3.547828074 | 0.000388422 | 0.001934808 |
| ENSG00000131153 | 275.9675425 | -0.371333012 | 0.11779279  | -3.152425636 | 0.001619201 | 0.006828253 |
| ENSG00000131165 | 268.7657652 | -0.058480583 | 0.12739901  | -0.459034831 | 0.646209154 | 0.772273267 |
| ENSG00000131171 | 685.5156369 | 0.448715964  | 0.091049628 | 4.928256947  | 8.30E-07    | 7.49E-06    |
| ENSG00000131174 | 742.3986286 | 0.394366743  | 0.082254535 | 4.794468087  | 1.63E-06    | 1.38E-05    |
| ENSG00000131187 | 160.7253798 | 0.482302057  | 0.145897974 | 3.305748834  | 0.00094723  | 0.004279747 |
| ENSG00000131188 | 112.3745574 | 0.527799119  | 0.181723073 | 2.90441445   | 0.003679407 | 0.01375689  |
| ENSG00000131236 | 854.4135352 | -0.010484215 | 0.07897424  | -0.132754874 | 0.894387244 | 0.942843412 |

|                 |             |              |             |              |             |             |
|-----------------|-------------|--------------|-------------|--------------|-------------|-------------|
| ENSG00000131238 | 541.7948378 | 0.549728984  | 0.095109439 | 5.779962398  | 7.47E-09    | 9.36E-08    |
| ENSG00000131242 | 178.8529097 | -1.001453043 | 0.144477904 | -6.931530815 | 4.16E-12    | 7.75E-11    |
| ENSG00000131263 | 797.4355951 | -0.124937143 | 0.079982776 | -1.562050611 | 0.118276067 | 0.239019408 |
| ENSG00000131269 | 240.7368414 | -0.318011838 | 0.124622844 | -2.551794096 | 0.010716983 | 0.034175134 |
| ENSG00000131323 | 493.6502802 | 0.061350269  | 0.092433324 | 0.663724575  | 0.506866608 | 0.664065744 |
| ENSG00000131351 | 187.0207888 | 0.163900071  | 0.135078197 | 1.213371773  | 0.224987713 | 0.383162156 |
| ENSG00000131368 | 984.3997644 | 0.193741031  | 0.072935703 | 2.656326376  | 0.007899712 | 0.026464882 |
| ENSG00000131370 | 155.5705242 | 0.657696432  | 0.149048258 | 4.412640854  | 1.02E-05    | 7.31E-05    |
| ENSG00000131373 | 157.6682214 | 0.056445153  | 0.148693089 | 0.37960845   | 0.704236088 | 0.814598762 |
| ENSG00000131374 | 1703.159428 | 0.051773919  | 0.061803382 | 0.837719832  | 0.402188073 | 0.570602551 |
| ENSG00000131375 | 478.3312417 | 0.173740141  | 0.096478308 | 1.800820772  | 0.071731134 | 0.161994732 |
| ENSG00000131378 | 62.31862283 | 0.764020039  | 0.227510625 | 3.358173008  | 0.000784595 | 0.003613851 |
| ENSG00000131381 | 195.5322007 | 0.502989268  | 0.135432109 | 3.713958767  | 0.000204042 | 0.001089388 |
| ENSG00000131389 | 622.0104232 | 0.233852782  | 0.088728664 | 2.635594527  | 0.008399003 | 0.027904634 |
| ENSG00000131398 | 786.837071  | -0.251981696 | 0.080727785 | -3.121375059 | 0.001800086 | 0.007465548 |
| ENSG00000131408 | 322.9252879 | 0.581222831  | 0.115869654 | 5.016178208  | 5.27E-07    | 4.97E-06    |
| ENSG00000131409 | 222.0487252 | 0.27778468   | 0.141844267 | 1.958377912  | 0.050185685 | 0.122197662 |
| ENSG00000131437 | 225.2093108 | -0.183592895 | 0.122632389 | -1.497099553 | 0.134367356 | 0.263023725 |
| ENSG00000131446 | 468.400658  | -0.479119181 | 0.099411472 | -4.819556249 | 1.44E-06    | 1.23E-05    |
| ENSG00000131459 | 109.639943  | -0.020982047 | 0.182408786 | -0.115027614 | 0.908423235 | 0.950936819 |
| ENSG00000131462 | 676.5759756 | 0.263567018  | 0.094170919 | 2.798815409  | 0.005129045 | 0.018281577 |
| ENSG00000131467 | 706.8232669 | 0.041959948  | 0.098564698 | 0.425709702  | 0.670319391 | 0.789599706 |
| ENSG00000131469 | 2878.911618 | 0.404897793  | 0.06247528  | 6.480928012  | 9.12E-11    | 1.45E-09    |
| ENSG00000131470 | 148.8734007 | -0.356667485 | 0.150352703 | -2.372205343 | 0.017682261 | 0.052236112 |
| ENSG00000131471 | 19.45814076 | -0.589303688 | 0.405210134 | -1.454316264 | 0.145858643 | 0.279252605 |
| ENSG00000131473 | 2304.634886 | 0.085579629  | 0.059771157 | 1.431788068  | 0.152204483 | 0.288402768 |
| ENSG00000131475 | 341.3572509 | -0.10713311  | 0.104341369 | -1.026755834 | 0.304535451 | 0.475480291 |
| ENSG00000131480 | 26.56928776 | -0.457306348 | 0.344554236 | -1.327240532 | 0.184429128 | 0.331925172 |
| ENSG00000131495 | 165.4308081 | -0.090498153 | 0.148720055 | -0.608513445 | 0.542846992 | 0.6920203   |
| ENSG00000131503 | 29.34245187 | -0.328472814 | 0.321695648 | -1.021067011 | 0.307222691 | 0.478284068 |
| ENSG00000131504 | 516.1656964 | -0.708822613 | 0.089990506 | -7.876637706 | 3.36E-15    | 8.19E-14    |
| ENSG00000131507 | 349.1332686 | 0.223207393  | 0.10236082  | 2.18059402   | 0.029213458 | 0.078781864 |
| ENSG00000131508 | 382.1294532 | 0.246586358  | 0.113608428 | 2.170493533  | 0.029969478 | 0.08040131  |
| ENSG00000131558 | 419.0178528 | 0.348211104  | 0.098233027 | 3.544745747  | 0.000392992 | 0.001953418 |
| ENSG00000131584 | 187.2692754 | -0.067440583 | 0.148268679 | -0.454853872 | 0.64921437  | 0.774150659 |
| ENSG00000131591 | 134.1189792 | 0.364791464  | 0.164928309 | 2.211818377  | 0.026979217 | 0.073932317 |
| ENSG00000131626 | 753.8448402 | 0.666918022  | 0.078812851 | 8.462046638  | 2.63E-17    | 7.38E-16    |
| ENSG00000131650 | 271.9334349 | -0.091276302 | 0.13364982  | -0.682951176 | 0.494637695 | 0.653699849 |
| ENSG00000131652 | 126.9401258 | -0.114016065 | 0.171150183 | -0.666175537 | 0.505298907 | 0.662868093 |
| ENSG00000131653 | 644.4227271 | 0.062355351  | 0.092851265 | 0.671561678  | 0.501862782 | 0.660204766 |
| ENSG00000131668 | 336.610161  | 3.033394099  | 0.14533388  | 20.87189929  | 9.64E-97    | 2.30E-94    |
| ENSG00000131669 | 334.7970821 | 0.283711567  | 0.122475915 | 2.316468247  | 0.020532716 | 0.059078874 |
| ENSG00000131697 | 160.4292724 | -0.206414656 | 0.155389779 | -1.328367011 | 0.184056892 | 0.331425095 |
| ENSG00000131711 | 1116.069603 | -1.459426952 | 0.079101378 | -18.45008253 | 5.21E-76    | 8.81E-74    |
| ENSG00000131724 | 483.4699906 | 0.022657361  | 0.100728715 | 0.224934484  | 0.822030243 | 0.895954284 |
| ENSG00000131725 | 128.4556608 | -0.418326287 | 0.164905144 | -2.536769177 | 0.011188069 | 0.03547603  |
| ENSG00000131732 | 182.4081274 | 0.245144499  | 0.136590559 | 1.794739709  | 0.072695181 | 0.163567068 |
| ENSG00000131747 | 2068.885036 | -0.12999356  | 0.069648152 | -1.866432286 | 0.06198091  | 0.144558977 |
| ENSG00000131748 | 134.2748317 | -0.016119938 | 0.162807516 | -0.09901225  | 0.921128544 | 0.956727767 |
| ENSG00000131759 | 248.1996407 | -0.061605642 | 0.123333823 | -0.499503224 | 0.617424916 | 0.751491881 |

|                 |             |              |             |              |             |             |
|-----------------|-------------|--------------|-------------|--------------|-------------|-------------|
| ENSG00000131771 | 62.62824093 | 0.398173808  | 0.226407434 | 1.758660488  | 0.078635192 | 0.174142921 |
| ENSG00000131778 | 76.83471653 | 0.278122319  | 0.206403062 | 1.347471863  | 0.17782831  | 0.323295139 |
| ENSG00000131779 | 42.27299163 | 0.195660975  | 0.281867505 | 0.694159388  | 0.487582258 | 0.64779673  |
| ENSG00000131781 | 14.26594087 | -0.406401415 | 0.499791505 | -0.813141902 | 0.416136705 | 0.583987529 |
| ENSG00000131788 | 324.2592575 | -0.083570527 | 0.115262088 | -0.725047827 | 0.46842269  | 0.630503404 |
| ENSG00000131791 | 195.2660768 | -0.378807947 | 0.133811057 | -2.830916637 | 0.004641482 | 0.016829864 |
| ENSG00000131828 | 759.4973908 | -0.02383067  | 0.077770674 | -0.306422315 | 0.75928312  | 0.854860493 |
| ENSG00000131844 | 710.6186975 | -0.254064778 | 0.08207669  | -3.09545596  | 0.001965106 | 0.008054811 |
| ENSG00000131845 | 59.32522478 | 0.266663417  | 0.245868212 | 1.084578664  | 0.278108309 | 0.446980132 |
| ENSG00000131848 | 20.21995064 | -0.417978628 | 0.389152445 | -1.074074269 | 0.282789396 | 0.452173323 |
| ENSG00000131871 | 307.0247459 | 0.175990054  | 0.109910126 | 1.601217836  | 0.10932868  | 0.224970506 |
| ENSG00000131873 | 655.9319191 | -0.09102944  | 0.084576151 | -1.076301512 | 0.281792433 | 0.450938517 |
| ENSG00000131876 | 578.7920205 | 0.22237286   | 0.085933882 | 2.58772041   | 0.009661336 | 0.03135693  |
| ENSG00000131899 | 287.0394269 | 0.010829901  | 0.11446564  | 0.094612683  | 0.924622476 | 0.958810774 |
| ENSG00000131914 | 530.0650647 | -2.352799806 | 0.105585383 | -22.28338558 | 5.36E-110   | 1.57E-107   |
| ENSG00000131931 | 124.6671976 | 0.280042591  | 0.166083263 | 1.686157807  | 0.091765408 | 0.196288821 |
| ENSG00000131941 | 148.7401919 | 0.128340001  | 0.147788951 | 0.868400518  | 0.385175111 | 0.554189777 |
| ENSG00000131943 | 102.1872864 | 0.293049253  | 0.178031153 | 1.646056032  | 0.099752224 | 0.209324691 |
| ENSG00000131944 | 31.75491934 | 0.128612354  | 0.306195535 | 0.420033409  | 0.674461048 | 0.792816263 |
| ENSG00000131966 | 159.4719657 | 0.162006625  | 0.144443893 | 1.121588603  | 0.2620374   | 0.428353235 |
| ENSG00000131979 | 16.85308952 | -0.093582335 | 0.424876978 | -0.220257487 | 0.825670628 | 0.898318899 |
| ENSG00000131981 | 187.5980335 | 3.713776827  | 0.193171582 | 19.22527521  | 2.27E-82    | 4.38E-80    |
| ENSG00000132000 | 23.80226119 | -0.331608009 | 0.353706451 | -0.937523213 | 0.348489489 | 0.520494777 |
| ENSG00000132002 | 794.937355  | 0.103939363  | 0.076981792 | 1.350181141  | 0.176957886 | 0.32211059  |
| ENSG00000132003 | 158.7573272 | 0.145245761  | 0.151574929 | 0.958243961  | 0.337939755 | 0.509886115 |
| ENSG00000132004 | 45.96939764 | -0.090675725 | 0.258491743 | -0.350787705 | 0.725747622 | 0.830312498 |
| ENSG00000132005 | 257.0094323 | 0.250733521  | 0.126289874 | 1.985381039  | 0.047102094 | 0.116341935 |
| ENSG00000132016 | 17.19440155 | -0.279074134 | 0.449377103 | -0.621024374 | 0.534583586 | 0.685592589 |
| ENSG00000132017 | 283.3511179 | 0.001374349  | 0.119445472 | 0.011506082  | 0.990819678 | 0.995236126 |
| ENSG00000132024 | 325.5131331 | 0.305071128  | 0.109376079 | 2.789194229  | 0.005283937 | 0.018752768 |
| ENSG00000132026 | 39.66469974 | -2.405590736 | 0.332639388 | -7.23182768  | 4.77E-13    | 9.80E-12    |
| ENSG00000132109 | 29.70611106 | 0.774878295  | 0.318947005 | 2.42948917   | 0.015120117 | 0.045853255 |
| ENSG00000132122 | 207.8696611 | -0.117757956 | 0.133259604 | -0.883673314 | 0.37687259  | 0.546505362 |
| ENSG00000132128 | 668.993451  | 0.265701807  | 0.083709873 | 3.174079703  | 0.001503124 | 0.006401916 |
| ENSG00000132153 | 2007.447423 | 0.226262033  | 0.063032045 | 3.589634958  | 0.000331141 | 0.001676232 |
| ENSG00000132155 | 1045.02236  | 0.201229361  | 0.070263954 | 2.863906007  | 0.004184522 | 0.015399522 |
| ENSG00000132170 | 87.62469653 | 0.838355738  | 0.190384652 | 4.403483828  | 1.07E-05    | 7.59E-05    |
| ENSG00000132182 | 3362.575377 | 0.070153316  | 0.065480738 | 1.071358054  | 0.284008466 | 0.453633078 |
| ENSG00000132196 | 84.88408855 | 0.425493738  | 0.201162924 | 2.115169778  | 0.03441548  | 0.090176132 |
| ENSG00000132199 | 561.022187  | -0.16591244  | 0.105231971 | -1.576635298 | 0.114879466 | 0.233634264 |
| ENSG00000132204 | 60.16879532 | 1.538195667  | 0.237045698 | 6.489025871  | 8.64E-11    | 1.38E-09    |
| ENSG00000132254 | 365.5650397 | 0.334257115  | 0.106498651 | 3.138604213  | 0.001697546 | 0.00711379  |
| ENSG00000132256 | 28.95282362 | -3.102431618 | 0.441150833 | -7.032587015 | 2.03E-12    | 3.92E-11    |
| ENSG00000132275 | 164.2058392 | 0.172241779  | 0.144202275 | 1.194445641  | 0.232303692 | 0.392207928 |
| ENSG00000132286 | 381.3256947 | -0.122717658 | 0.117464096 | -1.044724836 | 0.296150163 | 0.466579334 |
| ENSG00000132294 | 474.2852167 | -0.001892394 | 0.097637877 | -0.019381763 | 0.984536558 | 0.992018958 |
| ENSG00000132300 | 717.8914714 | -0.16211193  | 0.082557053 | -1.963635129 | 0.04957242  | 0.121040116 |
| ENSG00000132305 | 1024.776706 | -0.166335006 | 0.080887917 | -2.056364073 | 0.039747437 | 0.101360727 |
| ENSG00000132313 | 181.7383218 | 0.072380694  | 0.13665103  | 0.529675441  | 0.596336978 | 0.73589786  |
| ENSG00000132323 | 106.6620055 | 0.467268126  | 0.176553648 | 2.646607028  | 0.008130377 | 0.027108334 |

|                 |             |              |             |              |             |             |
|-----------------|-------------|--------------|-------------|--------------|-------------|-------------|
| ENSG00000132326 | 198.3014955 | 0.186885923  | 0.132261029 | 1.413008236  | 0.157653302 | 0.295786822 |
| ENSG00000132330 | 116.191687  | -0.273693694 | 0.166886964 | -1.639994444 | 0.101006322 | 0.211324964 |
| ENSG00000132334 | 27.06546864 | 4.663793193  | 0.611060357 | 7.632295461  | 2.31E-14    | 5.32E-13    |
| ENSG00000132341 | 1836.614289 | 0.155673136  | 0.073018038 | 2.131981898  | 0.033008335 | 0.087057469 |
| ENSG00000132356 | 404.6059111 | -0.215118386 | 0.098373893 | -2.186742637 | 0.028761317 | 0.077843973 |
| ENSG00000132359 | 235.1157069 | -0.260431631 | 0.122524832 | -2.125541627 | 0.033541444 | 0.088231586 |
| ENSG00000132361 | 1206.50715  | 0.212100372  | 0.07282971  | 2.912278149  | 0.00358803  | 0.013494258 |
| ENSG00000132376 | 52.78468262 | 0.263130447  | 0.246042649 | 1.069450553  | 0.284866698 | 0.454408643 |
| ENSG00000132382 | 993.7881761 | 0.201206449  | 0.071583018 | 2.810812586  | 0.004941656 | 0.017730637 |
| ENSG00000132383 | 756.9694736 | 0.178463853  | 0.084648114 | 2.10830277   | 0.035004809 | 0.091498427 |
| ENSG00000132386 | 1624.864992 | -0.433674072 | 0.072994783 | -5.941165312 | 2.83E-09    | 3.71E-08    |
| ENSG00000132388 | 405.9339956 | -0.003483609 | 0.103793408 | -0.03356291  | 0.973225699 | 0.986330341 |
| ENSG00000132394 | 143.5475824 | -0.543015547 | 0.154802458 | -3.50779668  | 0.000451834 | 0.00221224  |
| ENSG00000132405 | 603.4225444 | -0.058732485 | 0.085980047 | -0.683094353 | 0.494547224 | 0.653641781 |
| ENSG00000132406 | 36.16410951 | 0.100099987  | 0.289520745 | 0.345743745  | 0.729535306 | 0.832882188 |
| ENSG00000132423 | 46.19969749 | 0.172568974  | 0.282250622 | 0.611403345  | 0.540932589 | 0.690770916 |
| ENSG00000132424 | 1695.350676 | 0.04528886   | 0.068469741 | 0.661443422  | 0.508327987 | 0.665159127 |
| ENSG00000132429 | 103.3403127 | -0.158918247 | 0.178380392 | -0.890895268 | 0.372985359 | 0.543385744 |
| ENSG00000132432 | 427.8358443 | 0.600518095  | 0.124990951 | 4.80449258   | 1.55E-06    | 1.32E-05    |
| ENSG00000132434 | 172.3306297 | 0.233883607  | 0.142467382 | 1.641664246  | 0.100659605 | 0.210693708 |
| ENSG00000132436 | 145.372253  | -0.058087288 | 0.148908122 | -0.390088109 | 0.696471395 | 0.809476559 |
| ENSG00000132463 | 831.643622  | 0.356983688  | 0.080169421 | 4.452865998  | 8.47E-06    | 6.18E-05    |
| ENSG00000132464 | 11.07314878 | -2.949654186 | 0.685809093 | -4.300984361 | 1.70E-05    | 0.00011595  |
| ENSG00000132466 | 2295.19861  | -0.003037838 | 0.063171727 | -0.048088565 | 0.96164566  | 0.979709645 |
| ENSG00000132467 | 549.9871359 | -0.260553434 | 0.091340054 | -2.85256492  | 0.004336795 | 0.015866487 |
| ENSG00000132470 | 30.05756816 | 0.62439991   | 0.335409974 | 1.861602092  | 0.062659198 | 0.145777036 |
| ENSG00000132471 | 1387.949361 | 0.414334115  | 0.076317182 | 5.429106583  | 5.66E-08    | 6.21E-07    |
| ENSG00000132475 | 1639.280787 | -0.54450093  | 0.072636534 | -7.496240547 | 6.57E-14    | 1.45E-12    |
| ENSG00000132478 | 382.0412254 | -0.477666005 | 0.109789858 | -4.3507298   | 1.36E-05    | 9.47E-05    |
| ENSG00000132485 | 506.3816184 | 0.222232954  | 0.094280837 | 2.357138116  | 0.018416396 | 0.053984789 |
| ENSG00000132507 | 2853.398399 | 0.418907693  | 0.082654061 | 5.068204631  | 4.02E-07    | 3.86E-06    |
| ENSG00000132510 | 1062.412469 | -0.228715901 | 0.07626489  | -2.998967179 | 0.002708965 | 0.010567295 |
| ENSG00000132522 | 27.29003187 | -0.158391454 | 0.345205668 | -0.458832135 | 0.646354716 | 0.772319358 |
| ENSG00000132530 | 21.35413825 | 7.059906775  | 1.218990204 | 5.79160255   | 6.97E-09    | 8.78E-08    |
| ENSG00000132535 | 527.8769221 | 0.080416593  | 0.092167162 | 0.872508082  | 0.382931261 | 0.55240667  |
| ENSG00000132541 | 81.07718944 | -0.144406569 | 0.198328134 | -0.728119435 | 0.466540478 | 0.628880558 |
| ENSG00000132549 | 1088.24278  | 0.011415828  | 0.079045164 | 0.144421586  | 0.885167572 | 0.937067517 |
| ENSG00000132563 | 345.9134416 | 0.479665459  | 0.114414528 | 4.192347492  | 2.76E-05    | 0.000179813 |
| ENSG00000132570 | 118.1378702 | -0.002713203 | 0.165958785 | -0.016348653 | 0.986956243 | 0.993178189 |
| ENSG00000132581 | 75.17394789 | -0.18593975  | 0.207978216 | -0.894034738 | 0.371303305 | 0.54217406  |
| ENSG00000132589 | 512.7618184 | -0.384140145 | 0.090536186 | -4.242945968 | 2.21E-05    | 0.000147003 |
| ENSG00000132591 | 321.1148582 | -0.030950598 | 0.108962344 | -0.284048572 | 0.776373158 | 0.865943204 |
| ENSG00000132600 | 246.6980411 | 0.012794536  | 0.123914722 | 0.103252748  | 0.917762376 | 0.955355281 |
| ENSG00000132603 | 300.0457231 | 0.300577213  | 0.113410222 | 2.650353802  | 0.008040752 | 0.026870075 |
| ENSG00000132604 | 305.6290551 | 0.181300123  | 0.115211892 | 1.573623353  | 0.115574551 | 0.234516753 |
| ENSG00000132612 | 295.9325397 | 0.222597494  | 0.113788582 | 1.956237525  | 0.05043718  | 0.122682436 |
| ENSG00000132613 | 500.9895813 | -0.834187423 | 0.09139723  | -9.127053653 | 7.04E-20    | 2.36E-18    |
| ENSG00000132622 | 19.39216866 | 0.183333044  | 0.398568798 | 0.459978416  | 0.645531713 | 0.771726296 |
| ENSG00000132635 | 185.6017224 | -0.139136148 | 0.136112712 | -1.022212735 | 0.306680224 | 0.47759835  |
| ENSG00000132640 | 282.9670666 | -0.047027907 | 0.113851099 | -0.413065022 | 0.679558975 | 0.796741918 |

|                 |             |              |             |              |             |             |
|-----------------|-------------|--------------|-------------|--------------|-------------|-------------|
| ENSG00000132646 | 534.7227193 | -0.304375957 | 0.090335399 | -3.369398485 | 0.000753324 | 0.003486638 |
| ENSG00000132661 | 124.1382817 | 0.302760041  | 0.164451491 | 1.841029471  | 0.06561724  | 0.151251292 |
| ENSG00000132664 | 92.96256933 | 0.149999763  | 0.18397509  | 0.815326482  | 0.414885454 | 0.582964486 |
| ENSG00000132669 | 174.7568068 | -0.827710131 | 0.141348065 | -5.855829216 | 4.75E-09    | 6.06E-08    |
| ENSG00000132670 | 582.2215197 | -0.165684865 | 0.087545476 | -1.892557702 | 0.058416713 | 0.137704241 |
| ENSG00000132676 | 848.0130404 | 0.216878722  | 0.082577604 | 2.626362497  | 0.008630285 | 0.028517906 |
| ENSG00000132680 | 426.1906181 | 0.202079093  | 0.099120486 | 2.03872176   | 0.041477805 | 0.105207426 |
| ENSG00000132688 | 6208.733138 | 0.055783968  | 0.063261903 | 0.881794016  | 0.377888208 | 0.547293088 |
| ENSG00000132692 | 12.5420267  | -1.591419321 | 0.544948421 | -2.920311832 | 0.003496813 | 0.013190046 |
| ENSG00000132694 | 1084.315932 | -0.043735858 | 0.071171152 | -0.614516651 | 0.538873973 | 0.689521106 |
| ENSG00000132716 | 623.5404123 | -0.080368047 | 0.083435908 | -0.963230925 | 0.335431649 | 0.507136839 |
| ENSG00000132718 | 68.91464018 | 2.659840222  | 0.263628339 | 10.08935622  | 6.16E-24    | 2.57E-22    |
| ENSG00000132740 | 204.2946196 | 0.882068145  | 0.134491311 | 6.558551165  | 5.43E-11    | 8.94E-10    |
| ENSG00000132749 | 69.5343837  | 0.706478255  | 0.222180694 | 3.17974637   | 0.00147404  | 0.00630123  |
| ENSG00000132763 | 166.4008028 | 0.276321286  | 0.147439229 | 1.87413681   | 0.060911571 | 0.142604139 |
| ENSG00000132768 | 134.7207763 | 0.595147433  | 0.191654749 | 3.10531012   | 0.001900796 | 0.007834912 |
| ENSG00000132773 | 208.7826345 | 0.122966053  | 0.126203316 | 0.97434883   | 0.329883367 | 0.502255933 |
| ENSG00000132780 | 3009.602182 | -0.123779614 | 0.058831815 | -2.103957081 | 0.035382191 | 0.092227433 |
| ENSG00000132781 | 26.01386759 | 0.134144578  | 0.336219215 | 0.398979512  | 0.689908301 | 0.804902039 |
| ENSG00000132792 | 325.6170684 | 0.139678671  | 0.109114921 | 1.280106055  | 0.200507839 | 0.352728068 |
| ENSG00000132793 | 110.3843952 | -0.781912262 | 0.177815677 | -4.397319046 | 1.10E-05    | 7.80E-05    |
| ENSG00000132801 | 11.97128022 | -0.269981028 | 0.499549726 | -0.540448756 | 0.588887591 | 0.730235169 |
| ENSG00000132819 | 368.5692502 | 0.845658595  | 0.128640152 | 6.573830832  | 4.90E-11    | 8.09E-10    |
| ENSG00000132821 | 13.01623314 | -1.780246744 | 0.573609281 | -3.103587758 | 0.001911895 | 0.007872914 |
| ENSG00000132823 | 63.6244702  | -0.019001951 | 0.217789896 | -0.087249    | 0.930473592 | 0.962258893 |
| ENSG00000132824 | 623.1435371 | 0.176345377  | 0.086927807 | 2.028641744  | 0.042494794 | 0.107437791 |
| ENSG00000132825 | 69.15059426 | -0.945709835 | 0.219756982 | -4.303434755 | 1.68E-05    | 0.000114841 |
| ENSG00000132842 | 777.7933112 | -0.218708822 | 0.078939325 | -2.770594016 | 0.005595414 | 0.019674289 |
| ENSG00000132846 | 344.5555266 | -0.10759513  | 0.111504167 | -0.964942677 | 0.334573524 | 0.506275374 |
| ENSG00000132849 | 196.2027136 | -0.561815385 | 0.133670338 | -4.202992163 | 2.63E-05    | 0.000172476 |
| ENSG00000132879 | 141.7103403 | -0.137403542 | 0.15379673  | -0.893410034 | 0.371637631 | 0.542378577 |
| ENSG00000132881 | 17.31881767 | 0.167434214  | 0.410654871 | 0.407724894  | 0.683475659 | 0.799798615 |
| ENSG00000132906 | 136.1154174 | -0.033706107 | 0.153936312 | -0.218961376 | 0.826680135 | 0.898668717 |
| ENSG00000132912 | 465.9111198 | 0.255224122  | 0.103281464 | 2.471151266  | 0.013467884 | 0.041525905 |
| ENSG00000132932 | 17.35851455 | -1.801081134 | 0.467401933 | -3.853388287 | 0.000116494 | 0.000662241 |
| ENSG00000132950 | 73.476739   | 0.351588009  | 0.211738753 | 1.660480209  | 0.096817886 | 0.204419186 |
| ENSG00000132952 | 141.6599685 | 0.246027207  | 0.153769157 | 1.599977603  | 0.109603552 | 0.225351448 |
| ENSG00000132953 | 593.9065232 | -0.124553933 | 0.096302355 | -1.293363318 | 0.195885431 | 0.347068876 |
| ENSG00000132963 | 557.7552101 | 0.387230453  | 0.097061514 | 3.989536512  | 6.62E-05    | 0.000396735 |
| ENSG00000132964 | 234.7448009 | 0.03767592   | 0.126549577 | 0.297716679  | 0.765919412 | 0.858785918 |
| ENSG00000132967 | 467.8944843 | -0.050923874 | 0.094495651 | -0.538901773 | 0.589954634 | 0.731235572 |
| ENSG00000132970 | 595.2388107 | 0.261903687  | 0.085126318 | 3.076647645  | 0.002093426 | 0.008481787 |
| ENSG00000133019 | 19.92603224 | -5.781248475 | 1.04568459  | -5.528673301 | 3.23E-08    | 3.68E-07    |
| ENSG00000133026 | 3936.37207  | -0.08514942  | 0.056733389 | -1.500869612 | 0.133389289 | 0.261750019 |
| ENSG00000133027 | 238.6069894 | 0.396886653  | 0.126480111 | 3.137937276  | 0.001701413 | 0.007127869 |
| ENSG00000133028 | 506.2805455 | 0.18826111   | 0.094604207 | 1.989986666  | 0.046592404 | 0.115408835 |
| ENSG00000133030 | 1068.632814 | -0.070487121 | 0.069593851 | -1.012835468 | 0.311138756 | 0.482641219 |
| ENSG00000133056 | 171.5025412 | -0.089958313 | 0.14632979  | -0.614764176 | 0.538710471 | 0.689374691 |
| ENSG00000133059 | 354.7263591 | 0.084123606  | 0.103107247 | 0.815884509  | 0.414566193 | 0.582690746 |
| ENSG00000133065 | 676.0100555 | 0.001205299  | 0.080508891 | 0.014971     | 0.988055316 | 0.993928174 |



|                 |             |              |             |              |             |             |
|-----------------|-------------|--------------|-------------|--------------|-------------|-------------|
| ENSG00000133069 | 50.23419694 | -0.975867215 | 0.258253379 | -3.778720029 | 0.000157637 | 0.000866323 |
| ENSG00000133083 | 14.56637654 | 2.261782096  | 0.523338756 | 4.321831832  | 1.55E-05    | 0.000106342 |
| ENSG00000133103 | 86.71190716 | 0.407402022  | 0.192706408 | 2.114107293  | 0.034506104 | 0.090346179 |
| ENSG00000133104 | 15.08269452 | -3.060665387 | 0.606118037 | -5.049619383 | 4.43E-07    | 4.21E-06    |
| ENSG00000133107 | 56.48599115 | -4.554296804 | 0.444470499 | -10.24656714 | 1.23E-24    | 5.33E-23    |
| ENSG00000133110 | 2821.380381 | -2.806201309 | 0.070271596 | -39.93364997 | 0           | 0           |
| ENSG00000133111 | 31.36       | -0.353319692 | 0.316032998 | -1.11798355  | 0.263574019 | 0.430136762 |
| ENSG00000133112 | 9819.420527 | -0.074931313 | 0.050673764 | -1.478700356 | 0.139220417 | 0.269816391 |
| ENSG00000133114 | 233.4140669 | -0.22491163  | 0.126942618 | -1.771758237 | 0.076434698 | 0.170176474 |
| ENSG00000133119 | 247.1285651 | -0.111179984 | 0.132078999 | -0.841768828 | 0.399917364 | 0.568069492 |
| ENSG00000133121 | 49.77859032 | 0.456421233  | 0.247215357 | 1.846249517  | 0.064855984 | 0.14986544  |
| ENSG00000133131 | 142.1507804 | -0.14301645  | 0.153174099 | -0.933685598 | 0.350466096 | 0.522448749 |
| ENSG00000133134 | 70.03490875 | -0.669566222 | 0.216463445 | -3.093206905 | 0.00198006  | 0.008106647 |
| ENSG00000133138 | 68.72649924 | 0.334652117  | 0.219062083 | 1.527658788  | 0.126597277 | 0.251742916 |
| ENSG00000133142 | 1378.141595 | 0.082182457  | 0.070165979 | 1.17125789   | 0.241495132 | 0.404089479 |
| ENSG00000133193 | 508.7996082 | 0.077136484  | 0.090354143 | 0.853712756  | 0.393264165 | 0.561290936 |
| ENSG00000133195 | 63.72047751 | -0.23006279  | 0.246503307 | -0.933305085 | 0.35066247  | 0.522500564 |
| ENSG00000133216 | 41.74073485 | -0.565432487 | 0.271502556 | -2.082604657 | 0.037287274 | 0.096264353 |
| ENSG00000133226 | 2717.67229  | 0.025495354  | 0.060249067 | 0.423165948  | 0.672174189 | 0.791054862 |
| ENSG00000133243 | 505.6520033 | -0.344731667 | 0.092749282 | -3.716812244 | 0.000201752 | 0.001078392 |
| ENSG00000133247 | 118.1085736 | 0.259071136  | 0.18853143  | 1.374153562  | 0.169394014 | 0.311985595 |
| ENSG00000133250 | 65.74970339 | 0.391470679  | 0.234342217 | 1.670508557  | 0.094818788 | 0.201317943 |
| ENSG00000133265 | 116.9446537 | 0.467898644  | 0.16606456  | 2.817570728  | 0.004838846 | 0.017397303 |
| ENSG00000133275 | 950.0278087 | 0.15240271   | 0.086256643 | 1.766851859  | 0.077253041 | 0.171681177 |
| ENSG00000133302 | 123.9257321 | -0.22114821  | 0.160998325 | -1.373605658 | 0.169564139 | 0.312171358 |
| ENSG00000133313 | 381.842584  | 0.395404228  | 0.102615484 | 3.853260861  | 0.000116555 | 0.000662318 |
| ENSG00000133315 | 172.0589153 | 0.067506232  | 0.147974561 | 0.456201603  | 0.648245013 | 0.77370371  |
| ENSG00000133316 | 377.1898545 | 0.434222366  | 0.113300068 | 3.832498721  | 0.000126848 | 0.000715023 |
| ENSG00000133318 | 490.8306543 | 0.272247042  | 0.094225377 | 2.889317618  | 0.003860789 | 0.014347223 |
| ENSG00000133393 | 372.5488246 | -0.234534842 | 0.112987884 | -2.075752143 | 0.037916881 | 0.097513442 |
| ENSG00000133398 | 74.65414798 | 0.566691876  | 0.204828055 | 2.766671173  | 0.005663185 | 0.019857901 |
| ENSG00000133401 | 63.45203458 | 1.75064368   | 0.261180015 | 6.702824038  | 2.04E-11    | 3.49E-10    |
| ENSG00000133422 | 365.8980145 | 0.133566969  | 0.099906071 | 1.336925447  | 0.181246973 | 0.32792069  |
| ENSG00000133433 | 25.25897651 | 0.878936773  | 0.35306999  | 2.489412294  | 0.012795448 | 0.03979138  |
| ENSG00000133460 | 80.42599941 | -0.675792035 | 0.209682002 | -3.222937734 | 0.001268831 | 0.005523171 |
| ENSG00000133466 | 22.40930023 | -0.060294646 | 0.38655822  | -0.155978176 | 0.876050224 | 0.93127573  |
| ENSG00000133597 | 95.27409611 | 0.991649308  | 0.207504509 | 4.778928953  | 1.76E-06    | 1.48E-05    |
| ENSG00000133606 | 490.0168143 | 0.594219027  | 0.092176834 | 6.446511554  | 1.14E-10    | 1.80E-09    |
| ENSG00000133612 | 587.7221425 | 0.814543674  | 0.092893827 | 8.768544705  | 1.81E-18    | 5.69E-17    |
| ENSG00000133619 | 136.2835575 | 0.370660507  | 0.172414337 | 2.149824155  | 0.031569127 | 0.083875832 |
| ENSG00000133627 | 102.6570326 | 0.356034598  | 0.175640896 | 2.027059793  | 0.042656298 | 0.107701599 |
| ENSG00000133636 | 23.89596336 | 1.217299465  | 0.368696393 | 3.301631064  | 0.000961244 | 0.004336228 |
| ENSG00000133639 | 356.827149  | 0.233938446  | 0.10131045  | 2.309124535  | 0.020936672 | 0.059958701 |
| ENSG00000133640 | 9.612281573 | -0.576689723 | 0.560463334 | -1.02895174  | 0.303502354 | 0.474358887 |
| ENSG00000133641 | 157.7069985 | -0.257890952 | 0.155523873 | -1.65820814  | 0.097275462 | 0.205082526 |
| ENSG00000133657 | 707.7786517 | -0.119596627 | 0.085200146 | -1.403713879 | 0.160404068 | 0.299467828 |
| ENSG00000133678 | 37.61215424 | -0.751694314 | 0.292478919 | -2.570080317 | 0.010167494 | 0.0327425   |
| ENSG00000133687 | 40.48886898 | 3.821211517  | 0.41096987  | 9.298033248  | 1.43E-20    | 4.96E-19    |
| ENSG00000133703 | 184.9031416 | 0.020211721  | 0.137503841 | 0.146990226  | 0.883139735 | 0.935555344 |
| ENSG00000133704 | 223.7040172 | 0.147423513  | 0.127714434 | 1.15432147   | 0.248368397 | 0.412635231 |

|                 |             |              |             |              |             |             |
|-----------------|-------------|--------------|-------------|--------------|-------------|-------------|
| ENSG00000133706 | 1417.608041 | 0.0745627    | 0.06474609  | 1.15161702   | 0.249478484 | 0.413686171 |
| ENSG00000133731 | 188.8656342 | -0.251194536 | 0.132858396 | -1.890693722 | 0.058665241 | 0.138127831 |
| ENSG00000133739 | 99.41158011 | -0.900152977 | 0.186328286 | -4.831005517 | 1.36E-06    | 1.17E-05    |
| ENSG00000133740 | 124.3584158 | -0.136322219 | 0.168655387 | -0.808288557 | 0.418924489 | 0.586820133 |
| ENSG00000133773 | 453.5558513 | -0.121104682 | 0.092320314 | -1.311788022 | 0.189591668 | 0.338830651 |
| ENSG00000133789 | 261.1590037 | -0.02573704  | 0.123786886 | -0.207914106 | 0.835296034 | 0.903681716 |
| ENSG00000133794 | 12.83000959 | 0.442572397  | 0.485569396 | 0.911450352  | 0.362058134 | 0.532826674 |
| ENSG00000133812 | 461.4841652 | -0.091702526 | 0.110270639 | -0.831613266 | 0.405627272 | 0.573801237 |
| ENSG00000133816 | 32.49248546 | -0.669678779 | 0.311126926 | -2.152429514 | 0.031363541 | 0.083468174 |
| ENSG00000133818 | 89.22321552 | 0.731661813  | 0.190429471 | 3.842166907  | 0.000121953 | 0.000689365 |
| ENSG00000133835 | 522.6644949 | 0.034515113  | 0.08885257  | 0.388453735  | 0.697680285 | 0.81024793  |
| ENSG00000133858 | 704.4069999 | 0.290826652  | 0.083261391 | 3.492935292  | 0.000477742 | 0.00232531  |
| ENSG00000133863 | 1546.515697 | 0.07474955   | 0.06332709  | 1.180372405  | 0.237852132 | 0.399224388 |
| ENSG00000133872 | 397.0057641 | -0.271662343 | 0.109934243 | -2.471134893 | 0.0134685   | 0.041525905 |
| ENSG00000133874 | 24.25113305 | -0.280190987 | 0.353959778 | -0.791589905 | 0.428599835 | 0.595621477 |
| ENSG00000133884 | 342.3036034 | 0.141201849  | 0.109845349 | 1.285460433  | 0.198631435 | 0.350564914 |
| ENSG00000133895 | 345.2587742 | 0.312363741  | 0.108750415 | 2.872299312  | 0.004074968 | 0.015047602 |
| ENSG00000133935 | 373.0472249 | 0.215765888  | 0.117479    | 1.836633686  | 0.066263991 | 0.152391991 |
| ENSG00000133943 | 166.5594586 | -0.017528675 | 0.148882916 | -0.117734629 | 0.906277928 | 0.949823626 |
| ENSG00000133961 | 307.4351665 | -0.003265581 | 0.107829018 | -0.030284807 | 0.975839914 | 0.98780011  |
| ENSG00000133983 | 13.94126712 | -0.293176873 | 0.481186111 | -0.609279583 | 0.542339137 | 0.691623955 |
| ENSG00000133997 | 74.2655207  | -0.231926902 | 0.215925548 | -1.074105886 | 0.282775227 | 0.452173323 |
| ENSG00000134001 | 576.5732009 | 0.191774673  | 0.095637105 | 2.005232939  | 0.04493815  | 0.112141801 |
| ENSG00000134013 | 298.0903954 | -1.050622702 | 0.115807735 | -9.07212889  | 1.17E-19    | 3.88E-18    |
| ENSG00000134014 | 329.340441  | -0.037766469 | 0.112429248 | -0.335913204 | 0.73693632  | 0.838197934 |
| ENSG00000134030 | 303.5853786 | 0.153794882  | 0.112280515 | 1.36973795   | 0.170768718 | 0.313854269 |
| ENSG00000134046 | 323.5033347 | -0.004680456 | 0.118826581 | -0.039388967 | 0.968580276 | 0.983424201 |
| ENSG00000134049 | 127.692533  | 0.147557858  | 0.181237629 | 0.814167887  | 0.415548779 | 0.583340116 |
| ENSG00000134056 | 87.39526551 | -0.188451224 | 0.204805692 | -0.920146422 | 0.357496248 | 0.528772223 |
| ENSG00000134057 | 566.6752431 | -0.035169453 | 0.092532024 | -0.380078717 | 0.703886983 | 0.814364144 |
| ENSG00000134058 | 177.276368  | 0.045360101  | 0.144819624 | 0.313217919  | 0.754115105 | 0.851326439 |
| ENSG00000134070 | 76.78702397 | 0.154872508  | 0.206439474 | 0.750207822  | 0.453129548 | 0.617396281 |
| ENSG00000134072 | 323.1370024 | 0.65626262   | 0.114330605 | 5.740043267  | 9.47E-09    | 1.16E-07    |
| ENSG00000134077 | 410.5939956 | 0.099026483  | 0.098827453 | 1.002013921  | 0.316336869 | 0.487930603 |
| ENSG00000134086 | 990.0665979 | -0.089196914 | 0.076967197 | -1.158895183 | 0.246498913 | 0.410447002 |
| ENSG00000134107 | 389.2761521 | 0.032773006  | 0.104291073 | 0.314245549  | 0.75333455  | 0.850923965 |
| ENSG00000134108 | 60.87335428 | -0.449393119 | 0.234998935 | -1.912319806 | 0.055835187 | 0.132980141 |
| ENSG00000134109 | 210.6269879 | 0.009785322  | 0.126873248 | 0.077126757  | 0.938522707 | 0.966102042 |
| ENSG00000134138 | 1254.930701 | -0.464426534 | 0.068300335 | -6.799769531 | 1.05E-11    | 1.85E-10    |
| ENSG00000134146 | 161.0237011 | -0.348799325 | 0.145104578 | -2.403778919 | 0.016226583 | 0.048662428 |
| ENSG00000134152 | 95.56930937 | -0.28526027  | 0.182484812 | -1.56320006  | 0.118005546 | 0.238541359 |
| ENSG00000134153 | 378.3253617 | 0.302733307  | 0.10278008  | 2.945447276  | 0.003224881 | 0.012283054 |
| ENSG00000134184 | 193.3739822 | 0.311710595  | 0.136628946 | 2.28143893   | 0.022522487 | 0.063516035 |
| ENSG00000134186 | 1040.471638 | 0.048868357  | 0.080349593 | 0.608196691  | 0.543057029 | 0.692162425 |
| ENSG00000134202 | 41.63871712 | 0.229687195  | 0.272403504 | 0.843187373  | 0.399123659 | 0.567228859 |
| ENSG00000134222 | 188.455688  | -0.097973722 | 0.144121268 | -0.679800584 | 0.496630737 | 0.655162656 |
| ENSG00000134243 | 163.1994624 | -1.610618791 | 0.154895608 | -10.39809207 | 2.53E-25    | 1.15E-23    |
| ENSG00000134245 | 9.462804049 | -0.625272617 | 0.562904384 | -1.110797206 | 0.266655649 | 0.433380991 |
| ENSG00000134247 | 803.2165912 | 0.100626787  | 0.078153853 | 1.287547361  | 0.197903573 | 0.349415723 |
| ENSG00000134248 | 448.0147732 | 0.400216979  | 0.105064778 | 3.809240237  | 0.000139394 | 0.000776581 |

|                 |             |              |             |              |             |             |
|-----------------|-------------|--------------|-------------|--------------|-------------|-------------|
| ENSG00000134250 | 1286.84619  | 0.034784933  | 0.06969577  | 0.49909676   | 0.61771122  | 0.751514768 |
| ENSG00000134253 | 36.1856181  | -0.128432135 | 0.288719449 | -0.44483368  | 0.656439953 | 0.779657734 |
| ENSG00000134255 | 214.5153347 | -0.053502725 | 0.128010838 | -0.417954654 | 0.675980272 | 0.794117173 |
| ENSG00000134262 | 71.06544174 | 0.367732024  | 0.217319402 | 1.692126983  | 0.090621765 | 0.194434692 |
| ENSG00000134265 | 234.1666298 | -0.334776791 | 0.140823305 | -2.377282595 | 0.017440721 | 0.05170743  |
| ENSG00000134278 | 420.0912315 | 0.010875739  | 0.099249265 | 0.109580044  | 0.912742438 | 0.953043412 |
| ENSG00000134283 | 507.1404038 | 0.248851714  | 0.096288289 | 2.58444424   | 0.009753607 | 0.031597846 |
| ENSG00000134285 | 55.6938941  | -0.586502732 | 0.271370723 | -2.161260161 | 0.030675249 | 0.082012793 |
| ENSG00000134287 | 487.802766  | -0.38550625  | 0.095575817 | -4.033512477 | 5.49E-05    | 0.000334144 |
| ENSG00000134291 | 194.5400094 | 0.253450744  | 0.133801452 | 1.894230152  | 0.058194468 | 0.137314109 |
| ENSG00000134294 | 1462.40445  | -0.389528041 | 0.072075631 | -5.404434657 | 6.50E-08    | 7.07E-07    |
| ENSG00000134297 | 35.28518534 | -0.563119661 | 0.302889205 | -1.859160552 | 0.063004385 | 0.146357299 |
| ENSG00000134308 | 1662.785661 | 0.115964424  | 0.072831726 | 1.592224042  | 0.111334373 | 0.228142077 |
| ENSG00000134313 | 517.3300878 | -0.189854255 | 0.090882179 | -2.089015211 | 0.036706354 | 0.095096672 |
| ENSG00000134318 | 672.0976596 | -0.317437863 | 0.083114674 | -3.819275804 | 0.000133844 | 0.000749345 |
| ENSG00000134324 | 508.2800085 | -0.195397958 | 0.099076286 | -1.972197044 | 0.048587117 | 0.119297891 |
| ENSG00000134333 | 3743.220809 | 0.239908043  | 0.079437678 | 3.020078751  | 0.00252709  | 0.009976961 |
| ENSG00000134343 | 413.9638773 | 1.002923394  | 0.105940901 | 9.466819547  | 2.88E-21    | 1.05E-19    |
| ENSG00000134352 | 339.9724324 | 0.095934868  | 0.103848568 | 0.923795772  | 0.355592657 | 0.527122209 |
| ENSG00000134369 | 432.1568263 | -1.925581537 | 0.117425248 | -16.39836045 | 1.96E-60    | 2.58E-58    |
| ENSG00000134371 | 580.03807   | -0.042612094 | 0.086845519 | -0.490665435 | 0.623663097 | 0.755746988 |
| ENSG00000134375 | 489.4209803 | 0.14016984   | 0.101692961 | 1.378363256  | 0.168091162 | 0.310367177 |
| ENSG00000134419 | 484.1984431 | 0.103738959  | 0.221826838 | 0.467657384  | 0.640029621 | 0.767565619 |
| ENSG00000134440 | 1493.947949 | 0.10246906   | 0.070574821 | 1.451920943  | 0.146523588 | 0.280143847 |
| ENSG00000134444 | 184.3758931 | -0.008839493 | 0.134042755 | -0.065945327 | 0.947421353 | 0.970914655 |
| ENSG00000134452 | 479.5086287 | -0.008102437 | 0.100392794 | -0.080707354 | 0.935674688 | 0.964731953 |
| ENSG00000134453 | 895.0596665 | 0.148621262  | 0.076052704 | 1.954187743  | 0.050679018 | 0.123142738 |
| ENSG00000134461 | 132.8173973 | 0.412867299  | 0.15885085  | 2.59908775   | 0.009347188 | 0.030513582 |
| ENSG00000134470 | 57.60667614 | 0.927532351  | 0.242806046 | 3.820054589  | 0.000133422 | 0.000747281 |
| ENSG00000134480 | 159.9750668 | -0.131401384 | 0.155573111 | -0.844627866 | 0.398318646 | 0.566485979 |
| ENSG00000134490 | 84.84375109 | -0.208691876 | 0.191317832 | -1.090812463 | 0.275355411 | 0.443721173 |
| ENSG00000134504 | 106.510227  | 0.466734741  | 0.177820511 | 2.624751994  | 0.00867121  | 0.028626202 |
| ENSG00000134508 | 23.78148542 | -4.706662127 | 0.712064625 | -6.609880565 | 3.85E-11    | 6.41E-10    |
| ENSG00000134531 | 2281.332158 | -1.50368911  | 0.078638515 | -19.12153484 | 1.67E-81    | 3.17E-79    |
| ENSG00000134533 | 9.439823461 | -5.53358099  | 1.260579065 | -4.389713539 | 1.14E-05    | 8.05E-05    |
| ENSG00000134569 | 445.5600752 | 0.031770534  | 0.096213835 | 0.330207547  | 0.741243145 | 0.841937613 |
| ENSG00000134574 | 205.4232059 | -0.216790609 | 0.130198746 | -1.665074473 | 0.095897899 | 0.203097048 |
| ENSG00000134575 | 155.033214  | -0.324330763 | 0.148746256 | -2.180429752 | 0.029225621 | 0.078781864 |
| ENSG00000134588 | 5.743718977 | -5.802563716 | 1.313225533 | -4.418558403 | 9.94E-06    | 7.13E-05    |
| ENSG00000134590 | 222.7121235 | 0.215670229  | 0.125835449 | 1.713906784  | 0.086545847 | 0.187638449 |
| ENSG00000134597 | 165.9613234 | 0.001940276  | 0.146885975 | 0.013209401  | 0.989460729 | 0.994744093 |
| ENSG00000134602 | 394.08983   | 0.343518641  | 0.105792134 | 3.247109482  | 0.001165835 | 0.005132087 |
| ENSG00000134644 | 1040.164009 | -0.181609031 | 0.073759359 | -2.462182863 | 0.013809424 | 0.042381686 |
| ENSG00000134668 | 49.85208225 | -0.607055205 | 0.257926225 | -2.353600168 | 0.018592598 | 0.054376477 |
| ENSG00000134684 | 1621.551232 | 0.62205199   | 0.066323971 | 9.378991908  | 6.66E-21    | 2.37E-19    |
| ENSG00000134686 | 425.7987797 | 0.271714095  | 0.096572608 | 2.813573128  | 0.004899424 | 0.017588094 |
| ENSG00000134690 | 350.3413675 | -0.120389762 | 0.107286105 | -1.122137501 | 0.261803981 | 0.428099137 |
| ENSG00000134697 | 713.548732  | 0.047275325  | 0.08605009  | 0.54939309   | 0.582735715 | 0.724910431 |
| ENSG00000134698 | 122.0013555 | -0.159369781 | 0.164996262 | -0.965899346 | 0.33409455  | 0.505990311 |
| ENSG00000134717 | 225.4249324 | -0.137965194 | 0.12913296  | -1.068396437 | 0.285341724 | 0.454959727 |

|                 |             |              |             |              |             |             |
|-----------------|-------------|--------------|-------------|--------------|-------------|-------------|
| ENSG00000134744 | 922.2854733 | -0.284184305 | 0.078394353 | -3.625060903 | 0.000288893 | 0.001489206 |
| ENSG00000134748 | 414.8753841 | -0.158070194 | 0.10636831  | -1.486064725 | 0.137262002 | 0.266941622 |
| ENSG00000134758 | 129.320019  | -0.25970618  | 0.16089265  | -1.614158139 | 0.106493129 | 0.220343053 |
| ENSG00000134759 | 219.425331  | -0.174293127 | 0.127290038 | -1.369259763 | 0.170918091 | 0.313964485 |
| ENSG00000134769 | 6.496527107 | -5.979302076 | 1.304270718 | -4.584402604 | 4.55E-06    | 3.52E-05    |
| ENSG00000134775 | 31.46923985 | -0.609043152 | 0.324346897 | -1.87775236  | 0.06041505  | 0.141630542 |
| ENSG00000134779 | 509.7283632 | -0.064843994 | 0.093824343 | -0.691121214 | 0.48948937  | 0.6491557   |
| ENSG00000134780 | 47.46138397 | 0.489478281  | 0.254430039 | 1.92382269   | 0.054376812 | 0.130279905 |
| ENSG00000134809 | 307.9189593 | 0.636710952  | 0.121170316 | 5.25467764   | 1.48E-07    | 1.53E-06    |
| ENSG00000134815 | 361.3818431 | 0.625173246  | 0.103416389 | 6.045204732  | 1.49E-09    | 2.04E-08    |
| ENSG00000134824 | 2242.315739 | -0.230617658 | 0.075117905 | -3.070075731 | 0.002140045 | 0.008633318 |
| ENSG00000134825 | 302.0595045 | 0.56496354   | 0.123151786 | 4.587538323  | 4.49E-06    | 3.47E-05    |
| ENSG00000134851 | 353.7833102 | 0.011185156  | 0.10263649  | 0.108978357  | 0.913219657 | 0.953329111 |
| ENSG00000134852 | 622.9167163 | -0.057029005 | 0.100310982 | -0.568522051 | 0.569680537 | 0.714810407 |
| ENSG00000134853 | 67.76565906 | -7.560090284 | 1.011504605 | -7.47410367  | 7.77E-14    | 1.71E-12    |
| ENSG00000134864 | 33.96902668 | -0.870039021 | 0.309050927 | -2.815196285 | 0.004874745 | 0.017517407 |
| ENSG00000134871 | 7.172319222 | -6.125063402 | 1.305807044 | -4.690634373 | 2.72E-06    | 2.21E-05    |
| ENSG00000134874 | 1062.677943 | -0.161240933 | 0.074696588 | -2.158611766 | 0.030880299 | 0.082451162 |
| ENSG00000134882 | 166.6623703 | -0.012893972 | 0.148928895 | -0.086578044 | 0.931006919 | 0.962597835 |
| ENSG00000134884 | 773.3675047 | 0.009661169  | 0.079688235 | 0.12123708   | 0.903503255 | 0.948047376 |
| ENSG00000134897 | 109.069408  | 0.216983234  | 0.179805291 | 1.206767791  | 0.227521583 | 0.386083074 |
| ENSG00000134899 | 53.86670189 | 0.49619567   | 0.240548403 | 2.062768512  | 0.039134627 | 0.100058993 |
| ENSG00000134900 | 734.2254068 | 0.010832822  | 0.079199246 | 0.136779364  | 0.891205195 | 0.94027635  |
| ENSG00000134901 | 115.1330492 | -0.311267589 | 0.170837984 | -1.822004577 | 0.068454291 | 0.156303223 |
| ENSG00000134905 | 694.2444398 | 0.259041744  | 0.088286075 | 2.934117793  | 0.003344972 | 0.012685428 |
| ENSG00000134909 | 169.4126324 | -0.237440716 | 0.144203607 | -1.646565716 | 0.099647342 | 0.209167098 |
| ENSG00000134910 | 1562.392279 | 0.49693177   | 0.06507019  | 7.636857536  | 2.23E-14    | 5.14E-13    |
| ENSG00000134970 | 235.6681995 | 0.150635415  | 0.125975612 | 1.195750616  | 0.231793893 | 0.391488375 |
| ENSG00000134982 | 542.0519265 | -0.257189402 | 0.08791913  | -2.925295115 | 0.003441297 | 0.013005084 |
| ENSG00000134986 | 213.7395715 | -0.331816865 | 0.14294931  | -2.321220469 | 0.020274948 | 0.058444494 |
| ENSG00000134987 | 428.9778561 | 0.139379261  | 0.100365627 | 1.38871509   | 0.164919404 | 0.30606723  |
| ENSG00000134996 | 77.27067555 | 0.463695157  | 0.199300323 | 2.326615178  | 0.019985756 | 0.057736276 |
| ENSG00000135002 | 67.78348117 | 0.049401133  | 0.230903824 | 0.213946792  | 0.83058855  | 0.90129605  |
| ENSG00000135018 | 1013.026053 | 0.301539331  | 0.073729605 | 4.089799897  | 4.32E-05    | 0.000269317 |
| ENSG00000135040 | 318.96272   | -0.021525691 | 0.108264997 | -0.198824108 | 0.842400337 | 0.908568607 |
| ENSG00000135045 | 89.80649158 | -0.090773485 | 0.188905063 | -0.480524362 | 0.630854584 | 0.760980193 |
| ENSG00000135047 | 539.7442051 | 0.596095215  | 0.09786674  | 6.090886633  | 1.12E-09    | 1.55E-08    |
| ENSG00000135048 | 21.45840605 | -0.250786118 | 0.373878989 | -0.670768152 | 0.502368239 | 0.660436748 |
| ENSG00000135049 | 135.2875754 | -0.266258558 | 0.15552804  | -1.711964981 | 0.086903122 | 0.188192695 |
| ENSG00000135052 | 2461.864035 | 0.666168398  | 0.065280429 | 10.20471851  | 1.89E-24    | 8.06E-23    |
| ENSG00000135069 | 864.4424726 | -0.186302499 | 0.078938271 | -2.360103608 | 0.018269832 | 0.053660482 |
| ENSG00000135070 | 176.3587363 | 0.38671866   | 0.147093689 | 2.629063575  | 0.008562035 | 0.028359092 |
| ENSG00000135074 | 59.71092364 | -0.967151836 | 0.236627203 | -4.087238599 | 4.37E-05    | 0.000272173 |
| ENSG00000135090 | 303.4252859 | 0.029414961  | 0.113713691 | 0.258675629  | 0.795885525 | 0.878339214 |
| ENSG00000135093 | 66.19897992 | -0.038649358 | 0.254178013 | -0.15205626  | 0.879142562 | 0.933715074 |
| ENSG00000135097 | 27.88706786 | -3.091187659 | 0.79248369  | -3.900632527 | 9.59E-05    | 0.000554606 |
| ENSG00000135108 | 257.6599132 | -0.018900343 | 0.118806427 | -0.159085186 | 0.87360176  | 0.930010149 |
| ENSG00000135119 | 219.7363837 | 0.300421765  | 0.133215233 | 2.255160758  | 0.02412324  | 0.06726952  |
| ENSG00000135124 | 86.17861352 | 0.292214214  | 0.190668776 | 1.532575077  | 0.125380586 | 0.249995897 |
| ENSG00000135127 | 75.22718377 | 0.305795544  | 0.224499717 | 1.362119953  | 0.173160032 | 0.316881055 |

|                 |             |              |             |              |             |             |
|-----------------|-------------|--------------|-------------|--------------|-------------|-------------|
| ENSG00000135148 | 271.1558592 | -0.110856367 | 0.11676308  | -0.949412836 | 0.342410685 | 0.514366687 |
| ENSG00000135164 | 369.2704989 | -0.118350653 | 0.106751026 | -1.10866057  | 0.267576638 | 0.434425455 |
| ENSG00000135185 | 72.59821211 | -0.126913995 | 0.218080337 | -0.581959827 | 0.560593741 | 0.707146494 |
| ENSG00000135205 | 11.83080202 | -0.856073663 | 0.507592109 | -1.686538555 | 0.091692115 | 0.196187994 |
| ENSG00000135211 | 16.98762891 | -0.088895494 | 0.440427027 | -0.201839325 | 0.840042337 | 0.906960118 |
| ENSG00000135218 | 10.96509728 | -0.266949388 | 0.533143556 | -0.500708271 | 0.61657645  | 0.750779831 |
| ENSG00000135241 | 91.98254931 | 0.599761725  | 0.185229995 | 3.237929831  | 0.001204004 | 0.005270379 |
| ENSG00000135245 | 48.95870293 | 1.137822818  | 0.259663256 | 4.38191693   | 1.18E-05    | 8.31E-05    |
| ENSG00000135249 | 164.6603586 | 0.725662412  | 0.142218061 | 5.102463141  | 3.35E-07    | 3.26E-06    |
| ENSG00000135250 | 680.5522861 | 0.631805401  | 0.084065566 | 7.515626551  | 5.66E-14    | 1.26E-12    |
| ENSG00000135253 | 22.87150777 | 1.503089111  | 0.384526668 | 3.908933335  | 9.27E-05    | 0.000537663 |
| ENSG00000135269 | 41.9543358  | -7.703376077 | 1.199379785 | -6.422799663 | 1.34E-10    | 2.08E-09    |
| ENSG00000135272 | 87.61600191 | 0.476010272  | 0.194800399 | 2.443579548  | 0.014542363 | 0.044311622 |
| ENSG00000135297 | 219.3153311 | 0.059406852  | 0.124872723 | 0.475739224  | 0.634260173 | 0.763514667 |
| ENSG00000135299 | 36.17406854 | -0.804747091 | 0.292600148 | -2.750330431 | 0.00595352  | 0.020710523 |
| ENSG00000135315 | 37.79636072 | 0.022454532  | 0.289436777 | 0.077580094  | 0.938162077 | 0.966102042 |
| ENSG00000135316 | 696.4911404 | -0.136042455 | 0.08527725  | -1.595295986 | 0.110646063 | 0.226963382 |
| ENSG00000135317 | 206.6976597 | -0.267068721 | 0.129282923 | -2.065769519 | 0.038850248 | 0.099513025 |
| ENSG00000135324 | 19.81327247 | 1.301765994  | 0.413930904 | 3.144887182  | 0.001661509 | 0.006977344 |
| ENSG00000135333 | 197.8117712 | -5.633873415 | 0.328510408 | -17.14975622 | 6.31E-66    | 9.64E-64    |
| ENSG00000135334 | 238.0969875 | 0.0193613    | 0.119684877 | 0.161768978  | 0.871487783 | 0.928463321 |
| ENSG00000135336 | 238.8811935 | 0.210091778  | 0.122592056 | 1.71374708   | 0.086575186 | 0.187644135 |
| ENSG00000135338 | 429.0441718 | -1.809406996 | 0.106133238 | -17.04844806 | 3.59E-65    | 5.31E-63    |
| ENSG00000135341 | 272.3661416 | -0.028809546 | 0.114373065 | -0.251891004 | 0.801125313 | 0.881375883 |
| ENSG00000135362 | 10.91384549 | -0.495538083 | 0.521055122 | -0.951028139 | 0.341590092 | 0.513573373 |
| ENSG00000135365 | 1156.260997 | 0.019970425  | 0.069369522 | 0.28788472   | 0.773434983 | 0.864315132 |
| ENSG00000135372 | 999.5687606 | 0.099727122  | 0.07670485  | 1.300141015  | 0.193552642 | 0.344374157 |
| ENSG00000135378 | 19.13943949 | 2.547632066  | 0.471691663 | 5.401053833  | 6.63E-08    | 7.19E-07    |
| ENSG00000135387 | 2640.586235 | 0.031027865  | 0.062361233 | 0.497550539  | 0.618800873 | 0.752449434 |
| ENSG00000135390 | 1948.395016 | 0.335691668  | 0.062173534 | 5.399269551  | 6.69E-08    | 7.25E-07    |
| ENSG00000135392 | 274.3533173 | 0.475166417  | 0.121025755 | 3.926159497  | 8.63E-05    | 0.000504342 |
| ENSG00000135404 | 1676.38471  | 0.378720206  | 0.076831196 | 4.929250445  | 8.25E-07    | 7.46E-06    |
| ENSG00000135407 | 42.30588627 | -0.494016891 | 0.294848995 | -1.675491181 | 0.0938379   | 0.199616702 |
| ENSG00000135414 | 285.733906  | -0.467470124 | 0.115275316 | -4.055249111 | 5.01E-05    | 0.000308411 |
| ENSG00000135423 | 50.51136646 | -0.262953574 | 0.270642343 | -0.971590665 | 0.331254228 | 0.503748852 |
| ENSG00000135424 | 161.9624013 | 0.302310855  | 0.146786981 | 2.059520899  | 0.039444365 | 0.100685989 |
| ENSG00000135436 | 8.248599253 | -1.267329821 | 0.633747971 | -1.999737875 | 0.045528576 | 0.113293164 |
| ENSG00000135439 | 499.4274044 | -0.31220837  | 0.102389058 | -3.049235683 | 0.002294244 | 0.009186787 |
| ENSG00000135441 | 9.688977013 | -0.530316381 | 0.590099957 | -0.898689069 | 0.368818301 | 0.540172107 |
| ENSG00000135446 | 767.9421331 | 0.253259371  | 0.0785285   | 3.225063143  | 0.001259449 | 0.005490893 |
| ENSG00000135451 | 379.5542787 | -0.311052618 | 0.106976814 | -2.907663883 | 0.003641395 | 0.013651101 |
| ENSG00000135452 | 71.22772425 | -0.351003048 | 0.213357311 | -1.645141883 | 0.099940555 | 0.209625949 |
| ENSG00000135454 | 320.0552234 | 0.917917402  | 0.126162665 | 7.275665916  | 3.45E-13    | 7.17E-12    |
| ENSG00000135457 | 402.417652  | 0.466061948  | 0.098963501 | 4.70943268   | 2.48E-06    | 2.03E-05    |
| ENSG00000135469 | 96.86284464 | -0.971703608 | 0.18948131  | -5.128229306 | 2.92E-07    | 2.86E-06    |
| ENSG00000135473 | 88.03096688 | -0.574591627 | 0.195593768 | -2.937678604 | 0.003306796 | 0.012557602 |
| ENSG00000135476 | 477.8998522 | -0.187885304 | 0.098994403 | -1.897938647 | 0.057704165 | 0.136321964 |
| ENSG00000135482 | 73.13198142 | 0.630254977  | 0.230857854 | 2.730056464  | 0.006332348 | 0.021826914 |
| ENSG00000135486 | 2330.226522 | 0.049612651  | 0.060835133 | 0.815526295  | 0.41477112  | 0.582882566 |
| ENSG00000135503 | 88.55238663 | -0.163544433 | 0.187611805 | -0.871717175 | 0.383362688 | 0.552575821 |

|                 |             |              |             |              |             |             |
|-----------------|-------------|--------------|-------------|--------------|-------------|-------------|
| ENSG00000135506 | 885.6362911 | 0.214138194  | 0.075176415 | 2.848475716  | 0.004392921 | 0.016044554 |
| ENSG00000135519 | 38.83109485 | 0.162921406  | 0.284246803 | 0.573168827  | 0.566530389 | 0.712129967 |
| ENSG00000135521 | 305.1245388 | 0.239015584  | 0.114388961 | 2.0894987    | 0.036662855 | 0.095001498 |
| ENSG00000135525 | 34.63358151 | 1.662700252  | 0.323270198 | 5.143376227  | 2.70E-07    | 2.65E-06    |
| ENSG00000135535 | 723.376791  | 0.134319851  | 0.082938815 | 1.619505316  | 0.105338584 | 0.218402811 |
| ENSG00000135537 | 40.7697878  | -0.302707515 | 0.270510299 | -1.119023993 | 0.263129904 | 0.429689114 |
| ENSG00000135540 | 60.9224287  | -0.441270578 | 0.230786814 | -1.912026816 | 0.055872755 | 0.133047056 |
| ENSG00000135541 | 414.9068608 | -0.013322352 | 0.096452592 | -0.138123317 | 0.890142958 | 0.939855542 |
| ENSG00000135587 | 81.22973159 | 0.233986354  | 0.210460343 | 1.111783586  | 0.266231211 | 0.433092046 |
| ENSG00000135596 | 37.23831345 | -0.548718597 | 0.302610761 | -1.81328184  | 0.069788363 | 0.15867872  |
| ENSG00000135597 | 319.8456079 | -0.018324642 | 0.112207834 | -0.163309827 | 0.870274497 | 0.927874449 |
| ENSG00000135605 | 59.49383565 | -0.587554206 | 0.234490932 | -2.505658534 | 0.012222359 | 0.038263312 |
| ENSG00000135617 | 54.70343112 | 0.456210586  | 0.241959719 | 1.885481551  | 0.059364853 | 0.139587896 |
| ENSG00000135622 | 41.22337836 | 0.080842518  | 0.284056818 | 0.284599814  | 0.775950754 | 0.865699624 |
| ENSG00000135624 | 1799.111234 | 0.314757818  | 0.063464323 | 4.959602565  | 7.06E-07    | 6.47E-06    |
| ENSG00000135625 | 14.21549547 | 0.009921121  | 0.459039084 | 0.021612802  | 0.982756822 | 0.991509378 |
| ENSG00000135631 | 273.3309859 | 0.613667714  | 0.114019508 | 5.382129117  | 7.36E-08    | 7.89E-07    |
| ENSG00000135632 | 146.7086147 | 0.147332735  | 0.158353753 | 0.930402547  | 0.3521627   | 0.523715899 |
| ENSG00000135637 | 54.84767556 | 0.153764834  | 0.234339066 | 0.656163892  | 0.511718679 | 0.667791925 |
| ENSG00000135643 | 12.15089856 | -0.070385746 | 0.526206477 | -0.133760699 | 0.893591805 | 0.94236367  |
| ENSG00000135655 | 211.94954   | -0.290408877 | 0.129055406 | -2.250265105 | 0.024432122 | 0.067986928 |
| ENSG00000135677 | 228.8493647 | 0.008566692  | 0.124686623 | 0.068705785  | 0.945223814 | 0.969665557 |
| ENSG00000135679 | 928.0625035 | 0.044627156  | 0.076668472 | 0.582079641  | 0.560513038 | 0.707146494 |
| ENSG00000135686 | 232.8142948 | 0.096998703  | 0.125008595 | 0.775936273  | 0.437786614 | 0.603314879 |
| ENSG00000135698 | 94.38896528 | 0.090679885  | 0.185873987 | 0.487856782  | 0.625651288 | 0.757101486 |
| ENSG00000135709 | 40.40362881 | 0.933762176  | 0.282025551 | 3.310913403  | 0.00092992  | 0.004213737 |
| ENSG00000135720 | 784.2831364 | 0.046062662  | 0.079181088 | 0.581738171  | 0.560743056 | 0.707146494 |
| ENSG00000135722 | 14.55638523 | 0.80862851   | 0.473981647 | 1.706033379  | 0.088001865 | 0.189886667 |
| ENSG00000135723 | 583.44364   | 0.228909901  | 0.08592793  | 2.663975511  | 0.007722318 | 0.025957264 |
| ENSG00000135736 | 137.5466998 | -0.254317053 | 0.154642627 | -1.644546898 | 0.100063285 | 0.209789398 |
| ENSG00000135740 | 55.97054384 | 0.384439795  | 0.242283696 | 1.586734072  | 0.112572886 | 0.230008921 |
| ENSG00000135747 | 13.96763711 | -0.34914161  | 0.473339978 | -0.737612765 | 0.460749796 | 0.624062519 |
| ENSG00000135763 | 233.8500555 | 0.0100935    | 0.120057769 | 0.084072028  | 0.932999164 | 0.963270344 |
| ENSG00000135766 | 213.5449709 | 0.592425601  | 0.128248669 | 4.619350863  | 3.85E-06    | 3.02E-05    |
| ENSG00000135775 | 321.2193941 | -0.23923212  | 0.121425199 | -1.970201584 | 0.048815272 | 0.119690719 |
| ENSG00000135776 | 194.8920051 | 0.126363818  | 0.143041346 | 0.883407639  | 0.377016065 | 0.546593525 |
| ENSG00000135778 | 162.337052  | 0.029755535  | 0.150701436 | 0.197446924  | 0.843477813 | 0.909242025 |
| ENSG00000135801 | 374.1601257 | 0.030457074  | 0.101655856 | 0.299609639  | 0.764474931 | 0.858193827 |
| ENSG00000135821 | 711.3187743 | -0.427551433 | 0.080394774 | -5.31814959  | 1.05E-07    | 1.10E-06    |
| ENSG00000135823 | 539.2886992 | -0.004134621 | 0.088892037 | -0.046512834 | 0.962901505 | 0.980491297 |
| ENSG00000135828 | 37.144588   | -0.611876737 | 0.304180776 | -2.011556234 | 0.044266737 | 0.110800936 |
| ENSG00000135829 | 2941.97509  | 0.092109457  | 0.060786646 | 1.515290986  | 0.12969873  | 0.25624164  |
| ENSG00000135835 | 43.47163222 | 1.011981674  | 0.295400672 | 3.425793408  | 0.000613006 | 0.002906143 |
| ENSG00000135837 | 1203.587732 | -0.635972612 | 0.074196672 | -8.571443922 | 1.02E-17    | 2.97E-16    |
| ENSG00000135838 | 60.24453292 | -0.13063667  | 0.251703144 | -0.51901088  | 0.603753154 | 0.741439589 |
| ENSG00000135842 | 106.1243595 | 0.546560017  | 0.174479156 | 3.132523275  | 0.001733107 | 0.007239058 |
| ENSG00000135845 | 145.6381697 | -0.677941586 | 0.158243562 | -4.284165346 | 1.83E-05    | 0.000124054 |
| ENSG00000135862 | 2923.658254 | 0.015959589  | 0.057135071 | 0.279330868  | 0.77999092  | 0.868394424 |
| ENSG00000135870 | 626.3566924 | -0.207651607 | 0.087206219 | -2.381155961 | 0.017258403 | 0.051231782 |
| ENSG00000135899 | 48.07737212 | 1.662588634  | 0.275199568 | 6.041392592  | 1.53E-09    | 2.09E-08    |

|                 |             |              |             |              |             |             |
|-----------------|-------------|--------------|-------------|--------------|-------------|-------------|
| ENSG00000135900 | 162.4933937 | -0.217691152 | 0.145541967 | -1.49572771  | 0.134724626 | 0.263466076 |
| ENSG00000135912 | 627.4455891 | 0.060005046  | 0.090549164 | 0.662679183  | 0.507536045 | 0.664432322 |
| ENSG00000135913 | 223.5594958 | -0.277447159 | 0.12478716  | -2.223363038 | 0.02619133  | 0.072153287 |
| ENSG00000135914 | 44.2901685  | -6.361501741 | 0.866162898 | -7.344463441 | 2.07E-13    | 4.38E-12    |
| ENSG00000135916 | 548.005018  | 0.17099077   | 0.10192996  | 1.677532004  | 0.093438497 | 0.198988866 |
| ENSG00000135917 | 29.95388091 | 0.296229514  | 0.317621974 | 0.932648047  | 0.351001717 | 0.522671567 |
| ENSG00000135924 | 199.4764863 | 0.3293209    | 0.141485578 | 2.327593422  | 0.019933703 | 0.057614964 |
| ENSG00000135926 | 233.1071581 | 0.613042744  | 0.135775698 | 4.515113917  | 6.33E-06    | 4.74E-05    |
| ENSG00000135930 | 400.8355555 | -0.197080357 | 0.102860569 | -1.915995199 | 0.055365707 | 0.132161437 |
| ENSG00000135931 | 724.5011523 | -2.135630563 | 0.09409248  | -22.69714387 | 4.78E-114   | 1.49E-111   |
| ENSG00000135932 | 262.3505988 | -0.078969748 | 0.121263091 | -0.651226582 | 0.514900233 | 0.670697661 |
| ENSG00000135940 | 1065.237209 | 0.230680664  | 0.077892752 | 2.961516424  | 0.003061282 | 0.011742715 |
| ENSG00000135945 | 232.0278844 | -0.030432131 | 0.125628845 | -0.242238407 | 0.808595437 | 0.886947088 |
| ENSG00000135951 | 49.12890892 | -0.143811771 | 0.254781984 | -0.564450313 | 0.572447706 | 0.717385398 |
| ENSG00000135953 | 97.22775001 | 0.255961191  | 0.179355679 | 1.427115059  | 0.153546732 | 0.290139904 |
| ENSG00000135956 | 197.0338847 | -0.0396274   | 0.142020001 | -0.279026895 | 0.780224185 | 0.868470711 |
| ENSG00000135966 | 354.8267155 | 0.241246944  | 0.10292492  | 2.343911902  | 0.019082678 | 0.055532294 |
| ENSG00000135968 | 336.4037664 | -0.183191122 | 0.108302276 | -1.691479888 | 0.090745186 | 0.194610324 |
| ENSG00000135972 | 215.5477222 | -0.030634156 | 0.13898321  | -0.220416235 | 0.825547002 | 0.898253969 |
| ENSG00000135974 | 147.7785844 | -0.074969476 | 0.15072438  | -0.49739449  | 0.61891089  | 0.752518071 |
| ENSG00000135976 | 383.3310503 | -0.319254597 | 0.103920594 | -3.07210136  | 0.002125575 | 0.008581483 |
| ENSG00000135999 | 263.3532704 | -0.095046434 | 0.115310295 | -0.824266686 | 0.409788043 | 0.578173226 |
| ENSG00000136002 | 115.1570145 | -0.214252993 | 0.165657253 | -1.293351115 | 0.195889649 | 0.347068876 |
| ENSG00000136003 | 234.7127807 | -0.035626337 | 0.122946109 | -0.289771978 | 0.771990687 | 0.86337203  |
| ENSG00000136010 | 674.7900497 | -0.449246129 | 0.094690511 | -4.744362687 | 2.09E-06    | 1.74E-05    |
| ENSG00000136021 | 286.9972085 | 0.002889248  | 0.116021955 | 0.024902597  | 0.980132656 | 0.989928345 |
| ENSG00000136026 | 1609.321487 | 0.761189135  | 0.066400132 | 11.46366909  | 2.01E-30    | 1.11E-28    |
| ENSG00000136044 | 92.26965698 | -0.574971396 | 0.193244258 | -2.975360835 | 0.002926441 | 0.011297601 |
| ENSG00000136045 | 350.7976344 | 0.157268711  | 0.102209969 | 1.538682703  | 0.123881777 | 0.247993063 |
| ENSG00000136048 | 61.40611503 | 0.057439135  | 0.223670202 | 0.256802801  | 0.797331007 | 0.879045586 |
| ENSG00000136051 | 311.4157787 | 0.039374942  | 0.113817123 | 0.345949192  | 0.729380899 | 0.832773591 |
| ENSG00000136052 | 57.9089206  | 0.512166789  | 0.234349851 | 2.185479476  | 0.028853709 | 0.078018875 |
| ENSG00000136068 | 969.9213411 | -0.16922399  | 0.074694355 | -2.26555259  | 0.023478791 | 0.065777138 |
| ENSG00000136098 | 117.965407  | -0.046055522 | 0.175401434 | -0.262572095 | 0.792880411 | 0.876423602 |
| ENSG00000136100 | 367.7284604 | -0.295417508 | 0.105454382 | -2.80137727  | 0.005088499 | 0.018164714 |
| ENSG00000136104 | 232.6939466 | -0.353847895 | 0.129911237 | -2.723766654 | 0.006454209 | 0.022210258 |
| ENSG00000136108 | 862.651338  | -0.200153162 | 0.076386542 | -2.62026734  | 0.008786086 | 0.028944219 |
| ENSG00000136111 | 411.4947548 | -0.114168107 | 0.101845535 | -1.120992759 | 0.262290944 | 0.428598579 |
| ENSG00000136114 | 18.60813586 | -0.192682908 | 0.396253884 | -0.486261247 | 0.626781952 | 0.757759366 |
| ENSG00000136122 | 88.87096079 | -0.227485295 | 0.188803632 | -1.204877748 | 0.2282505   | 0.38696065  |
| ENSG00000136141 | 189.2316936 | 0.265634969  | 0.134819515 | 1.970300582  | 0.048803932 | 0.119690719 |
| ENSG00000136143 | 178.3656648 | -0.17276215  | 0.135650175 | -1.273585896 | 0.202810213 | 0.355620405 |
| ENSG00000136144 | 157.7673298 | 0.064964999  | 0.148033187 | 0.438854286  | 0.660767123 | 0.783076162 |
| ENSG00000136146 | 477.0557142 | 0.000328843  | 0.091599643 | 0.003590007  | 0.997135595 | 0.998813347 |
| ENSG00000136147 | 61.54458304 | 0.240976065  | 0.221396498 | 1.088436661  | 0.276402384 | 0.444897936 |
| ENSG00000136152 | 141.7172634 | 0.194700936  | 0.154457909 | 1.26054365   | 0.207473312 | 0.361480964 |
| ENSG00000136153 | 119.8603244 | -0.677134935 | 0.172308399 | -3.929784837 | 8.50E-05    | 0.000498873 |
| ENSG00000136156 | 1231.830148 | 0.245890517  | 0.079448706 | 3.094959368  | 0.001968399 | 0.008065955 |
| ENSG00000136158 | 2174.216414 | -0.04600536  | 0.06591057  | -0.69799669  | 0.485179264 | 0.645572902 |
| ENSG00000136159 | 163.0695569 | -0.101240539 | 0.146655011 | -0.690331263 | 0.489985892 | 0.649630187 |

|                 |             |              |             |              |             |             |
|-----------------|-------------|--------------|-------------|--------------|-------------|-------------|
| ENSG00000136161 | 48.68746994 | -0.181960254 | 0.250508426 | -0.726363806 | 0.467615773 | 0.629756504 |
| ENSG00000136169 | 114.4504394 | -0.056789744 | 0.173375944 | -0.327552614 | 0.743249955 | 0.842922019 |
| ENSG00000136193 | 1284.294682 | -0.077492478 | 0.066794888 | -1.16015582  | 0.245985371 | 0.409693681 |
| ENSG00000136205 | 33.75978315 | -2.226455212 | 0.3534746   | -6.29877002  | 3.00E-10    | 4.46E-09    |
| ENSG00000136213 | 174.3752317 | -0.255885212 | 0.140468035 | -1.8216615   | 0.068506363 | 0.156396698 |
| ENSG00000136231 | 590.8197223 | -0.049651973 | 0.084779753 | -0.585658385 | 0.558105105 | 0.705122829 |
| ENSG00000136238 | 711.2095453 | 0.187046918  | 0.093775517 | 1.994624226  | 0.046083879 | 0.11433067  |
| ENSG00000136240 | 877.5346706 | -0.079471769 | 0.086687754 | -0.916758891 | 0.359268998 | 0.530567328 |
| ENSG00000136243 | 147.5254717 | -0.705785847 | 0.165528663 | -4.263828594 | 2.01E-05    | 0.000135062 |
| ENSG00000136247 | 163.0083303 | -0.292164754 | 0.160838626 | -1.816508643 | 0.069292383 | 0.157798757 |
| ENSG00000136261 | 349.3924174 | 0.124797568  | 0.107595728 | 1.159874757  | 0.246099801 | 0.409835674 |
| ENSG00000136267 | 122.3004938 | -4.457757543 | 0.296896198 | -15.01453227 | 5.90E-51    | 6.42E-49    |
| ENSG00000136270 | 478.6815471 | 0.067935035  | 0.09887611  | 0.687072285  | 0.492037178 | 0.651427544 |
| ENSG00000136271 | 809.2737928 | 0.192746127  | 0.084826499 | 2.27223957   | 0.023072044 | 0.064855205 |
| ENSG00000136273 | 87.07234264 | -0.099318905 | 0.193601142 | -0.513007846 | 0.607945832 | 0.744534883 |
| ENSG00000136279 | 525.3569367 | 0.060197702  | 0.089297204 | 0.674127508  | 0.500230252 | 0.658427132 |
| ENSG00000136280 | 202.4432557 | 0.1476566    | 0.132409516 | 1.115150962  | 0.264785736 | 0.431540229 |
| ENSG00000136295 | 687.0285883 | -0.042516513 | 0.098198258 | -0.432966061 | 0.665039426 | 0.785752277 |
| ENSG00000136319 | 82.10778911 | 0.111143844  | 0.194263981 | 0.572127904  | 0.567235326 | 0.712697194 |
| ENSG00000136367 | 209.8685264 | -0.363136979 | 0.127092136 | -2.857273393 | 0.004272976 | 0.015663491 |
| ENSG00000136371 | 39.40274399 | -0.826701067 | 0.301135954 | -2.745275203 | 0.006046017 | 0.020975156 |
| ENSG00000136378 | 43.05672715 | -1.979716862 | 0.307144921 | -6.445546463 | 1.15E-10    | 1.81E-09    |
| ENSG00000136379 | 191.4672637 | 0.30832411   | 0.131169309 | 2.350581186  | 0.018744118 | 0.054774002 |
| ENSG00000136381 | 307.4780099 | -0.393724411 | 0.110520344 | -3.562460964 | 0.000367395 | 0.001842482 |
| ENSG00000136383 | 13.11688081 | -0.126346161 | 0.4846042   | -0.260720317 | 0.794308197 | 0.877449453 |
| ENSG00000136425 | 189.8619699 | -0.412412572 | 0.136001629 | -3.032409066 | 0.002426102 | 0.009634833 |
| ENSG00000136436 | 352.4605079 | -0.157877218 | 0.108441668 | -1.455872269 | 0.145427933 | 0.278617863 |
| ENSG00000136444 | 320.1334227 | 0.409618781  | 0.111018372 | 3.689648602  | 0.000224564 | 0.001186776 |
| ENSG00000136448 | 825.5034002 | 0.202008071  | 0.076852829 | 2.628505324  | 0.008576101 | 0.028392292 |
| ENSG00000136450 | 983.8523115 | 0.120655109  | 0.076858958 | 1.569824949  | 0.116455842 | 0.235986037 |
| ENSG00000136451 | 299.2955273 | -0.407408801 | 0.113873323 | -3.577736995 | 0.000346582 | 0.00174872  |
| ENSG00000136463 | 70.92226388 | -0.103818347 | 0.21958026  | -0.472803645 | 0.636353274 | 0.765247362 |
| ENSG00000136478 | 627.1492642 | -0.219811989 | 0.086729001 | -2.534469271 | 0.01126178  | 0.035661458 |
| ENSG00000136485 | 1121.828077 | -0.15867034  | 0.0723936   | -2.191773035 | 0.028395899 | 0.077033062 |
| ENSG00000136490 | 126.7251919 | -0.179642724 | 0.165282633 | -1.086882028 | 0.27708895  | 0.445696608 |
| ENSG00000136492 | 566.5447352 | -0.652273783 | 0.089260241 | -7.307551202 | 2.72E-13    | 5.72E-12    |
| ENSG00000136504 | 613.2881421 | -0.027244933 | 0.086642356 | -0.314452819 | 0.753177145 | 0.850814585 |
| ENSG00000136518 | 341.748716  | 0.150910712  | 0.10727291  | 1.406792377  | 0.159488964 | 0.298195324 |
| ENSG00000136521 | 74.02630301 | -0.097887331 | 0.219136456 | -0.446695785 | 0.655094725 | 0.778784714 |
| ENSG00000136522 | 274.7317617 | 0.363371968  | 0.116985211 | 3.10613594   | 0.001895496 | 0.00782428  |
| ENSG00000136527 | 1273.509442 | -0.023267534 | 0.067155312 | -0.346473464 | 0.728986923 | 0.832662165 |
| ENSG00000136535 | 5.77349964  | -3.941544468 | 1.15811483  | -3.403414207 | 0.000665493 | 0.003124392 |
| ENSG00000136536 | 611.8913922 | -0.119940676 | 0.091606688 | -1.309300434 | 0.190432603 | 0.340115292 |
| ENSG00000136560 | 191.9089964 | -0.605315178 | 0.136991879 | -4.418620885 | 9.93E-06    | 7.13E-05    |
| ENSG00000136603 | 468.4548776 | -0.672025644 | 0.097063883 | -6.923539645 | 4.40E-12    | 8.14E-11    |
| ENSG00000136628 | 1532.543179 | 0.334981955  | 0.071026462 | 4.716297948  | 2.40E-06    | 1.97E-05    |
| ENSG00000136631 | 269.9913653 | -0.077877258 | 0.119055857 | -0.6541237   | 0.513032114 | 0.668946635 |
| ENSG00000136636 | 560.99649   | 0.0642552    | 0.105439444 | 0.609403822  | 0.542256805 | 0.691581745 |
| ENSG00000136643 | 185.6820255 | 0.17393532   | 0.135967663 | 1.279240342  | 0.200812434 | 0.353175442 |
| ENSG00000136682 | 36.52100725 | -0.162196526 | 0.318779446 | -0.508804843 | 0.610889024 | 0.746967107 |



|                 |             |              |             |              |             |             |
|-----------------|-------------|--------------|-------------|--------------|-------------|-------------|
| ENSG00000136699 | 721.4116446 | 0.085850376  | 0.081806665 | 1.049430089  | 0.293980216 | 0.464358495 |
| ENSG00000136709 | 776.8435166 | -0.115831487 | 0.082341898 | -1.406713836 | 0.159512261 | 0.298199193 |
| ENSG00000136710 | 142.432389  | 0.220605371  | 0.159285943 | 1.384964466  | 0.166063333 | 0.307783565 |
| ENSG00000136715 | 509.8408133 | -0.085840198 | 0.089814188 | -0.955753213 | 0.339196931 | 0.511070291 |
| ENSG00000136717 | 278.3510525 | 0.626885509  | 0.115289391 | 5.437495178  | 5.40E-08    | 5.96E-07    |
| ENSG00000136718 | 620.5711946 | 0.364266485  | 0.083422325 | 4.366534815  | 1.26E-05    | 8.84E-05    |
| ENSG00000136720 | 69.73926051 | -0.151776556 | 0.213778439 | -0.709971299 | 0.477721934 | 0.638134946 |
| ENSG00000136731 | 1024.305807 | -0.041684901 | 0.073363276 | -0.568198458 | 0.569900219 | 0.715022184 |
| ENSG00000136738 | 203.3907732 | -0.225785002 | 0.132915406 | -1.698712055 | 0.089373451 | 0.192285015 |
| ENSG00000136754 | 365.5842847 | 0.116896816  | 0.102418873 | 1.141360116  | 0.253720095 | 0.418654548 |
| ENSG00000136758 | 844.4185104 | 0.123624598  | 0.076111553 | 1.624255348  | 0.104321323 | 0.216679228 |
| ENSG00000136770 | 418.5216192 | -0.343787217 | 0.097532856 | -3.524834908 | 0.000423747 | 0.002090018 |
| ENSG00000136783 | 14.03619393 | -0.554730828 | 0.463787723 | -1.196087782 | 0.231662305 | 0.39131318  |
| ENSG00000136802 | 284.1111674 | 0.08097371   | 0.112714816 | 0.718394557  | 0.472514042 | 0.633981332 |
| ENSG00000136807 | 263.3689978 | 0.021723625  | 0.116283383 | 0.186816242  | 0.851804711 | 0.914988207 |
| ENSG00000136810 | 487.2646323 | 0.493805818  | 0.107184884 | 4.607047161  | 4.08E-06    | 3.18E-05    |
| ENSG00000136811 | 1034.987343 | -0.119444245 | 0.073423212 | -1.626791329 | 0.103781424 | 0.215867235 |
| ENSG00000136813 | 1683.986454 | 0.27137419   | 0.066981192 | 4.051498357  | 5.09E-05    | 0.000312439 |
| ENSG00000136816 | 164.5577747 | 0.23883426   | 0.142354207 | 1.677746415  | 0.093396614 | 0.198929832 |
| ENSG00000136819 | 966.2093428 | 0.440779204  | 0.081762978 | 5.390938718  | 7.01E-08    | 7.54E-07    |
| ENSG00000136824 | 682.4398295 | 0.201574741  | 0.080209578 | 2.513100619  | 0.01196752  | 0.037574374 |
| ENSG00000136827 | 280.0736072 | 0.01387406   | 0.117609884 | 0.117966787  | 0.906093974 | 0.949742267 |
| ENSG00000136828 | 49.02452038 | -0.770060445 | 0.258324917 | -2.980976256 | 0.002873311 | 0.011128038 |
| ENSG00000136830 | 232.5203034 | 0.241461302  | 0.124007272 | 1.947154376  | 0.05151623  | 0.124730741 |
| ENSG00000136840 | 226.2972221 | 0.483529512  | 0.131128128 | 3.687458355  | 0.000226505 | 0.001195236 |
| ENSG00000136848 | 345.3740828 | -0.944191113 | 0.11165109  | -8.456622422 | 2.75E-17    | 7.72E-16    |
| ENSG00000136854 | 922.8731349 | 0.079034816  | 0.075146532 | 1.051742693  | 0.292917618 | 0.463541004 |
| ENSG00000136856 | 41.19949176 | -0.385074482 | 0.277641532 | -1.386948411 | 0.165457494 | 0.306903661 |
| ENSG00000136859 | 145.1278191 | -0.474546903 | 0.152731298 | -3.107070438 | 0.001889514 | 0.007804175 |
| ENSG00000136861 | 1155.629744 | -0.168941626 | 0.071198068 | -2.372840039 | 0.017651907 | 0.052179363 |
| ENSG00000136866 | 52.93284208 | 0.034278701  | 0.241189515 | 0.142123511  | 0.886982448 | 0.938194798 |
| ENSG00000136867 | 14.97958778 | 0.338577595  | 0.48269386  | 0.701433401  | 0.483032584 | 0.643570018 |
| ENSG00000136868 | 321.6190225 | -0.254675045 | 0.118378755 | -2.151357696 | 0.031447978 | 0.083617214 |
| ENSG00000136870 | 96.56729159 | 0.025582517  | 0.178584939 | 0.143251259  | 0.886091748 | 0.937763187 |
| ENSG00000136874 | 333.6604166 | -0.567652114 | 0.10639356  | -5.335399215 | 9.53E-08    | 1.01E-06    |
| ENSG00000136875 | 520.58677   | 0.166218512  | 0.089958894 | 1.847716273  | 0.064643399 | 0.149497172 |
| ENSG00000136877 | 111.2335593 | 0.265543279  | 0.179446486 | 1.479790908  | 0.138929056 | 0.269577372 |
| ENSG00000136878 | 163.1813692 | 0.261631613  | 0.146225484 | 1.789234034  | 0.073577133 | 0.16502283  |
| ENSG00000136888 | 1131.643636 | 0.553370101  | 0.077193906 | 7.168572381  | 7.58E-13    | 1.53E-11    |
| ENSG00000136891 | 358.4143584 | 0.328358813  | 0.103597469 | 3.169564043  | 0.001526678 | 0.006482844 |
| ENSG00000136895 | 97.90099266 | -0.321879569 | 0.186265082 | -1.72807252  | 0.083975224 | 0.183532304 |
| ENSG00000136897 | 141.802572  | -0.086090162 | 0.154600323 | -0.55685629  | 0.577625621 | 0.721236186 |
| ENSG00000136908 | 118.3389667 | 0.275503258  | 0.165271509 | 1.666973694  | 0.095519636 | 0.202591624 |
| ENSG00000136925 | 135.0016875 | 0.114340794  | 0.159122068 | 0.718572824  | 0.472404163 | 0.633981332 |
| ENSG00000136930 | 992.625073  | 0.539691433  | 0.093468768 | 5.774029585  | 7.74E-09    | 9.67E-08    |
| ENSG00000136932 | 53.77537699 | -0.277820665 | 0.245157742 | -1.13323227  | 0.257116726 | 0.422868358 |
| ENSG00000136933 | 164.1161428 | 0.155465953  | 0.143519713 | 1.083237626  | 0.278702963 | 0.447443242 |
| ENSG00000136935 | 206.204895  | 0.347711831  | 0.131378564 | 2.646640511  | 0.008129572 | 0.027108334 |
| ENSG00000136936 | 153.7261179 | 0.256188027  | 0.148809565 | 1.721583067  | 0.085145073 | 0.185316522 |
| ENSG00000136937 | 333.7393673 | 0.080986774  | 0.108602939 | 0.74571439   | 0.455839965 | 0.61958531  |

|                 |             |              |             |              |             |             |
|-----------------|-------------|--------------|-------------|--------------|-------------|-------------|
| ENSG00000136938 | 2164.938116 | 0.124826334  | 0.061543214 | 2.028271293  | 0.042532567 | 0.107513941 |
| ENSG00000136940 | 201.7405936 | -0.145868915 | 0.132488156 | -1.10099589  | 0.270898446 | 0.438500861 |
| ENSG00000136942 | 2160.574754 | 0.383241546  | 0.061076489 | 6.274780211  | 3.50E-10    | 5.19E-09    |
| ENSG00000136943 | 130.9048704 | -0.988265853 | 0.161479388 | -6.120074319 | 9.35E-10    | 1.31E-08    |
| ENSG00000136944 | 50.95853958 | -1.468472767 | 0.2638407   | -5.565755272 | 2.61E-08    | 3.02E-07    |
| ENSG00000136950 | 306.9246485 | 0.215474554  | 0.118624694 | 1.816439287  | 0.069303013 | 0.157798757 |
| ENSG00000136982 | 194.5602184 | -0.470884805 | 0.134921972 | -3.490052796 | 0.000482925 | 0.002348096 |
| ENSG00000136986 | 393.4132745 | 0.335863528  | 0.102525375 | 3.275906362  | 0.001053235 | 0.004708717 |
| ENSG00000136997 | 3498.557789 | 0.304390561  | 0.061997652 | 4.90971111   | 9.12E-07    | 8.15E-06    |
| ENSG00000137038 | 196.8115091 | 0.18431475   | 0.145730902 | 1.264760925  | 0.205957043 | 0.359509655 |
| ENSG00000137040 | 99.23127099 | 0.199616911  | 0.179181936 | 1.114045957  | 0.265259472 | 0.431911417 |
| ENSG00000137054 | 316.8777107 | 0.310141215  | 0.109803332 | 2.824515507  | 0.004735216 | 0.017090333 |
| ENSG00000137055 | 338.312492  | -0.117839737 | 0.105774766 | -1.114062847 | 0.265252226 | 0.431911417 |
| ENSG00000137070 | 12.95733696 | -0.744778542 | 0.486971576 | -1.529408651 | 0.126163169 | 0.25112853  |
| ENSG00000137073 | 1007.764245 | -0.059718921 | 0.07468663  | -0.799593196 | 0.423946531 | 0.591201918 |
| ENSG00000137074 | 201.9151024 | 0.100183719  | 0.139834776 | 0.716443518  | 0.473717532 | 0.634892679 |
| ENSG00000137075 | 346.4929906 | -0.07758921  | 0.111392089 | -0.696541469 | 0.486089797 | 0.646507903 |
| ENSG00000137076 | 1965.526488 | -0.032924835 | 0.065224275 | -0.504794185 | 0.6137034   | 0.748716754 |
| ENSG00000137094 | 51.61477261 | -0.576342194 | 0.26069729  | -2.21077171  | 0.02705165  | 0.074073007 |
| ENSG00000137100 | 158.1446949 | 0.391256324  | 0.152681012 | 2.562573559  | 0.010389958 | 0.033351859 |
| ENSG00000137103 | 48.6326369  | -0.806561835 | 0.261224119 | -3.087623912 | 0.002017636 | 0.008236483 |
| ENSG00000137106 | 549.6596029 | 0.190238653  | 0.0985943   | 1.929509656  | 0.053667623 | 0.12879951  |
| ENSG00000137124 | 562.5509647 | -0.128921298 | 0.088226833 | -1.461248164 | 0.14394735  | 0.276497801 |
| ENSG00000137133 | 28.70256069 | -0.406812465 | 0.361434252 | -1.125550396 | 0.260355874 | 0.426544224 |
| ENSG00000137135 | 174.4395775 | 0.016800679  | 0.148258063 | 0.113320505  | 0.909776462 | 0.951381168 |
| ENSG00000137142 | 11.6337763  | -2.831108537 | 0.657910591 | -4.303181275 | 1.68E-05    | 0.000114861 |
| ENSG00000137145 | 402.2235944 | 0.018765519  | 0.098145248 | 0.191201501  | 0.848367728 | 0.912928344 |
| ENSG00000137154 | 8312.264511 | -0.041111018 | 0.057238599 | -0.718239421 | 0.472609676 | 0.633981332 |
| ENSG00000137161 | 348.116735  | 0.142120973  | 0.104295603 | 1.36267464   | 0.172985074 | 0.316650919 |
| ENSG00000137166 | 503.6072607 | 0.022371228  | 0.091021088 | 0.245780712  | 0.805851989 | 0.885189466 |
| ENSG00000137168 | 213.3198659 | 0.001850458  | 0.128532733 | 0.014396786  | 0.988513423 | 0.994175418 |
| ENSG00000137171 | 57.11040585 | -0.40483707  | 0.234398729 | -1.727129969 | 0.084144324 | 0.183654196 |
| ENSG00000137177 | 540.8757201 | 0.087947743  | 0.09128365  | 0.963455588  | 0.335318941 | 0.507124904 |
| ENSG00000137185 | 75.09476654 | 0.067309251  | 0.209915785 | 0.320648833  | 0.748476527 | 0.847003124 |
| ENSG00000137193 | 64.43099666 | -1.154976547 | 0.263942342 | -4.375866861 | 1.21E-05    | 8.51E-05    |
| ENSG00000137200 | 215.9881078 | -0.090531132 | 0.126773545 | -0.71411691  | 0.475154891 | 0.636151425 |
| ENSG00000137203 | 165.0648644 | -7.528844143 | 0.65808252  | -11.4405776  | 2.62E-30    | 1.44E-28    |
| ENSG00000137207 | 600.9210487 | 0.359841052  | 0.094346119 | 3.814052495  | 0.000136706 | 0.000762938 |
| ENSG00000137210 | 122.1181252 | -0.271580369 | 0.161289601 | -1.683805817 | 0.092219203 | 0.197035205 |
| ENSG00000137216 | 253.8056057 | -0.041200265 | 0.123944896 | -0.332407921 | 0.739581258 | 0.840729783 |
| ENSG00000137218 | 32.27772658 | -0.13936862  | 0.317451907 | -0.439022783 | 0.660645028 | 0.783076162 |
| ENSG00000137221 | 173.8587477 | 0.350403027  | 0.148589078 | 2.358201774  | 0.018363708 | 0.053864066 |
| ENSG00000137266 | 21.47196658 | -1.941216402 | 0.434910492 | -4.463484877 | 8.06E-06    | 5.91E-05    |
| ENSG00000137267 | 24.8683477  | 0.803474184  | 0.350558949 | 2.29198024   | 0.021906783 | 0.062191711 |
| ENSG00000137269 | 92.19639333 | -0.176427451 | 0.183732769 | -0.960239441 | 0.336934721 | 0.508806926 |
| ENSG00000137274 | 99.63758682 | -0.232322236 | 0.177409042 | -1.30952872  | 0.190355316 | 0.340020488 |
| ENSG00000137275 | 345.8340084 | -0.18097692  | 0.104023118 | -1.73977596  | 0.081898365 | 0.179866532 |
| ENSG00000137285 | 9.116412886 | -1.931827318 | 0.654745285 | -2.950502071 | 0.003172579 | 0.012116699 |
| ENSG00000137288 | 291.5676859 | -0.236474365 | 0.113845231 | -2.077156525 | 0.037787115 | 0.097277032 |
| ENSG00000137309 | 6631.481681 | 0.123648352  | 0.066649307 | 1.855208359  | 0.063566478 | 0.14744358  |

|                 |             |              |             |              |             |             |
|-----------------|-------------|--------------|-------------|--------------|-------------|-------------|
| ENSG00000137310 | 131.6367021 | 0.119092531  | 0.160968125 | 0.739851636  | 0.459390023 | 0.622670717 |
| ENSG00000137312 | 413.6993029 | 0.1418788    | 0.097223556 | 1.459304778  | 0.144481241 | 0.277371599 |
| ENSG00000137331 | 112.1359998 | -0.373636583 | 0.170466204 | -2.191851367 | 0.028390241 | 0.077032589 |
| ENSG00000137337 | 1389.028813 | 0.077902182  | 0.065466875 | 1.189948082  | 0.234066799 | 0.394662864 |
| ENSG00000137338 | 37.7876712  | -0.599419587 | 0.292406262 | -2.049954685 | 0.040368853 | 0.102561273 |
| ENSG00000137343 | 99.38479889 | 0.2139236    | 0.184850138 | 1.157281257  | 0.247157469 | 0.411255741 |
| ENSG00000137364 | 89.64714729 | 0.107084091  | 0.192706449 | 0.555685042  | 0.578426184 | 0.721948544 |
| ENSG00000137404 | 162.7304365 | -0.259391531 | 0.147882636 | -1.754036434 | 0.079424264 | 0.175467193 |
| ENSG00000137409 | 624.6315951 | 0.20088305   | 0.089489403 | 2.244769132  | 0.024782957 | 0.068745301 |
| ENSG00000137413 | 281.1999153 | -0.018682427 | 0.117231952 | -0.15936293  | 0.873382943 | 0.929849389 |
| ENSG00000137414 | 308.1835808 | 0.504929504  | 0.117841464 | 4.284820345  | 1.83E-05    | 0.000123748 |
| ENSG00000137449 | 27.16153794 | 0.883131065  | 0.343700907 | 2.569475515  | 0.010185259 | 0.032784677 |
| ENSG00000137474 | 158.4978839 | 0.478098609  | 0.149673566 | 3.194275534  | 0.001401823 | 0.006027754 |
| ENSG00000137478 | 334.0795731 | 0.665973014  | 0.111377258 | 5.979434485  | 2.24E-09    | 3.00E-08    |
| ENSG00000137486 | 121.4826527 | 0.516260187  | 0.162630011 | 3.174445996  | 0.001501228 | 0.006396444 |
| ENSG00000137492 | 218.2586347 | 0.223369384  | 0.130548964 | 1.711000823  | 0.087080961 | 0.188441124 |
| ENSG00000137494 | 176.1365563 | -0.150737909 | 0.144210428 | -1.045263583 | 0.295901164 | 0.46639628  |
| ENSG00000137496 | 63.0230092  | 0.490288409  | 0.229356731 | 2.137667413  | 0.032543746 | 0.086042161 |
| ENSG00000137497 | 3730.074957 | 0.430953482  | 0.058644973 | 7.348515309  | 2.00E-13    | 4.26E-12    |
| ENSG00000137500 | 249.4266531 | -0.334758913 | 0.123650849 | -2.707291671 | 0.006783463 | 0.023164212 |
| ENSG00000137501 | 6.481590555 | -1.75573387  | 0.750552702 | -2.339254612 | 0.01932226  | 0.056136461 |
| ENSG00000137502 | 31.81062661 | -0.094326776 | 0.309060939 | -0.305204457 | 0.760210438 | 0.855251964 |
| ENSG00000137504 | 637.6072754 | 0.008315562  | 0.086106324 | 0.09657319   | 0.923065348 | 0.957558448 |
| ENSG00000137509 | 297.9814213 | -0.465194319 | 0.111786884 | -4.161439169 | 3.16E-05    | 0.000203777 |
| ENSG00000137513 | 88.26186277 | -0.391758982 | 0.189626014 | -2.065955898 | 0.038832644 | 0.099486075 |
| ENSG00000137522 | 136.6873234 | 0.413313217  | 0.156307596 | 2.644229894  | 0.008187703 | 0.027273573 |
| ENSG00000137547 | 193.7672669 | 0.076266987  | 0.131711804 | 0.579044433  | 0.562559193 | 0.708853276 |
| ENSG00000137558 | 15.78682028 | -0.196195101 | 0.447389925 | -0.438532676 | 0.661000188 | 0.783153647 |
| ENSG00000137561 | 13.35652655 | 0.938735402  | 0.485920204 | 1.931871518  | 0.053375366 | 0.128274383 |
| ENSG00000137563 | 231.5957456 | 0.316387383  | 0.126474304 | 2.501594194  | 0.012363555 | 0.03864505  |
| ENSG00000137574 | 533.7347817 | -0.187892954 | 0.093287784 | -2.014121744 | 0.043996753 | 0.110423076 |
| ENSG00000137575 | 147.4634652 | 0.563339332  | 0.156263815 | 3.605052988  | 0.000312089 | 0.001592415 |
| ENSG00000137601 | 110.3876999 | -0.16761352  | 0.171831393 | -0.97545342  | 0.329335396 | 0.501837061 |
| ENSG00000137628 | 54.01890796 | 0.176116017  | 0.241857374 | 0.728181297  | 0.466502613 | 0.628880558 |
| ENSG00000137642 | 451.431051  | 0.860203063  | 0.09409168  | 9.142179897  | 6.12E-20    | 2.06E-18    |
| ENSG00000137656 | 174.9424914 | 0.203727557  | 0.137770652 | 1.478744227  | 0.139208687 | 0.269816391 |
| ENSG00000137691 | 31.74036797 | -0.212621764 | 0.309980499 | -0.685919805 | 0.49276368  | 0.652082093 |
| ENSG00000137692 | 540.5768991 | 0.223335884  | 0.087425244 | 2.554592613  | 0.010631214 | 0.033940152 |
| ENSG00000137693 | 1023.161562 | 0.306632239  | 0.075325831 | 4.070744879  | 4.69E-05    | 0.000290377 |
| ENSG00000137700 | 272.5089836 | 0.172335382  | 0.11690889  | 1.474099883  | 0.1404547   | 0.271518409 |
| ENSG00000137709 | 23.77917917 | 0.208702527  | 0.349952179 | 0.596374419  | 0.550925126 | 0.698621617 |
| ENSG00000137710 | 730.5934901 | -0.150591132 | 0.079233784 | -1.900592466 | 0.057355413 | 0.135722445 |
| ENSG00000137713 | 225.9975733 | -0.240754015 | 0.124389429 | -1.935486133 | 0.052930669 | 0.127458433 |
| ENSG00000137714 | 88.53104313 | -0.30334516  | 0.198953827 | -1.524701307 | 0.127333616 | 0.252492278 |
| ENSG00000137720 | 49.8432932  | -1.007524337 | 0.258697001 | -3.894611587 | 9.84E-05    | 0.000566233 |
| ENSG00000137726 | 40.72564975 | 0.867853896  | 0.281341962 | 3.084694119  | 0.002037616 | 0.008293941 |
| ENSG00000137760 | 70.07603023 | 0.073926547  | 0.218099498 | 0.338957896  | 0.734641449 | 0.83646822  |
| ENSG00000137764 | 147.7053088 | 0.11442895   | 0.152608866 | 0.749818494  | 0.453364029 | 0.617396281 |
| ENSG00000137770 | 673.3869588 | -0.277804662 | 0.087098956 | -3.189529181 | 0.001425048 | 0.006114124 |
| ENSG00000137776 | 1593.779143 | 0.131012649  | 0.065150735 | 2.010915912  | 0.044334339 | 0.110930614 |

|                 |             |              |             |              |             |             |
|-----------------|-------------|--------------|-------------|--------------|-------------|-------------|
| ENSG00000137801 | 36.2378604  | -3.475072103 | 0.437316831 | -7.946348856 | 1.92E-15    | 4.78E-14    |
| ENSG00000137802 | 243.2292294 | 0.041435761  | 0.12039874  | 0.34415444   | 0.730730143 | 0.833636508 |
| ENSG00000137806 | 113.39208   | 0.253513958  | 0.173858297 | 1.45816428   | 0.144795267 | 0.277783072 |
| ENSG00000137807 | 524.0623475 | 0.03935391   | 0.088078489 | 0.446805011  | 0.655015853 | 0.778784714 |
| ENSG00000137812 | 652.803653  | -0.126490187 | 0.087045397 | -1.453151932 | 0.146181575 | 0.279712991 |
| ENSG00000137814 | 97.77272673 | 0.42082667   | 0.18250833  | 2.305794314  | 0.021122128 | 0.06041591  |
| ENSG00000137815 | 1058.325156 | -0.064570691 | 0.074815112 | -0.863070168 | 0.388098889 | 0.556629068 |
| ENSG00000137817 | 143.1070445 | 0.298135746  | 0.152577292 | 1.953998145  | 0.050701437 | 0.123175904 |
| ENSG00000137818 | 2516.106229 | 0.078544744  | 0.06460607  | 1.215748673  | 0.224080676 | 0.382368958 |
| ENSG00000137819 | 24.29197914 | 0.703556754  | 0.354111853 | 1.986820685  | 0.046942272 | 0.116091213 |
| ENSG00000137821 | 25.88580378 | -0.005479635 | 0.343390918 | -0.015957425 | 0.987268357 | 0.993349947 |
| ENSG00000137822 | 490.3066874 | 0.23425224   | 0.094532677 | 2.478002825  | 0.01321201  | 0.040887663 |
| ENSG00000137824 | 134.1488491 | 0.302462854  | 0.159270353 | 1.899053073  | 0.057557498 | 0.136067011 |
| ENSG00000137825 | 415.6126486 | 0.431547911  | 0.102768805 | 4.199211151  | 2.68E-05    | 0.000174835 |
| ENSG00000137831 | 1604.251873 | -0.17463185  | 0.069543512 | -2.511116342 | 0.012035003 | 0.03777553  |
| ENSG00000137834 | 204.1007428 | 0.202722643  | 0.142713679 | 1.420485022  | 0.155466526 | 0.292975354 |
| ENSG00000137842 | 54.95427394 | 0.457192651  | 0.24327073  | 1.879357419  | 0.060195706 | 0.141187024 |
| ENSG00000137845 | 944.1609141 | 0.212811936  | 0.073203539 | 2.907126322  | 0.003647659 | 0.013664491 |
| ENSG00000137868 | 122.7833324 | -2.414649946 | 0.195394546 | -12.3578165  | 4.42E-35    | 2.89E-33    |
| ENSG00000137871 | 71.57073585 | -0.380530259 | 0.216951629 | -1.753986641 | 0.079432796 | 0.175467193 |
| ENSG00000137872 | 173.9108418 | -5.736345708 | 0.360152134 | -15.92756272 | 4.08E-57    | 5.03E-55    |
| ENSG00000137876 | 480.6712172 | 0.175920387  | 0.096451023 | 1.823934901  | 0.068161915 | 0.155862959 |
| ENSG00000137880 | 147.6703238 | -0.128359176 | 0.163048386 | -0.787245911 | 0.431137926 | 0.597552486 |
| ENSG00000137936 | 20.9794324  | -1.291493004 | 0.401705104 | -3.215027616 | 0.00130432  | 0.005656616 |
| ENSG00000137941 | 62.22644826 | 0.533875761  | 0.229476347 | 2.326495814  | 0.019992116 | 0.057736276 |
| ENSG00000137942 | 297.8022107 | -0.25499299  | 0.109308319 | -2.332786686 | 0.019659344 | 0.057009662 |
| ENSG00000137944 | 48.44260301 | 0.014994444  | 0.248760326 | 0.060276669  | 0.951935284 | 0.973488274 |
| ENSG00000137947 | 145.212439  | 0.362118013  | 0.152451248 | 2.375303696  | 0.017534517 | 0.051919763 |
| ENSG00000137955 | 674.8154833 | 0.13352668   | 0.083786223 | 1.593659142  | 0.1110124   | 0.22761512  |
| ENSG00000137959 | 13.01257994 | -3.485124665 | 0.710146795 | -4.90761162  | 9.22E-07    | 8.23E-06    |
| ENSG00000137992 | 259.9790137 | -0.438739064 | 0.121387833 | -3.614357827 | 0.000301093 | 0.001543596 |
| ENSG00000137996 | 175.0577984 | 0.447652446  | 0.137158264 | 3.263765755  | 0.00109942  | 0.004885655 |
| ENSG00000138002 | 191.5771956 | 0.080824081  | 0.138256219 | 0.584596353  | 0.558819161 | 0.705699959 |
| ENSG00000138018 | 721.7187766 | -0.141719401 | 0.081599667 | -1.736764464 | 0.082428754 | 0.180777003 |
| ENSG00000138029 | 766.1014087 | 0.186840374  | 0.078789298 | 2.371392798  | 0.017721187 | 0.052329096 |
| ENSG00000138030 | 86.69686222 | -1.040156773 | 0.199806031 | -5.205832703 | 1.93E-07    | 1.94E-06    |
| ENSG00000138031 | 871.5500464 | 0.511232494  | 0.077030254 | 6.636775373  | 3.21E-11    | 5.38E-10    |
| ENSG00000138032 | 44.51313884 | -0.40253038  | 0.267242597 | -1.50623585  | 0.13200664  | 0.259851074 |
| ENSG00000138035 | 410.7903941 | 0.134634096  | 0.096693065 | 1.392386265  | 0.163805461 | 0.304402079 |
| ENSG00000138036 | 78.4747689  | -0.033208645 | 0.199880943 | -0.166142127 | 0.868045102 | 0.926341226 |
| ENSG00000138050 | 146.853289  | 0.071457396  | 0.150274246 | 0.475513259  | 0.634421185 | 0.763643049 |
| ENSG00000138061 | 258.6546369 | -4.541516116 | 0.212103792 | -21.411763   | 1.04E-101   | 2.75E-99    |
| ENSG00000138069 | 1016.577164 | 0.02933431   | 0.077077285 | 0.380583075  | 0.703512642 | 0.814282078 |
| ENSG00000138071 | 1136.721368 | -0.080095219 | 0.085865385 | -0.932799862 | 0.350923312 | 0.522671567 |
| ENSG00000138073 | 582.2326807 | 0.223702569  | 0.088762017 | 2.520251076  | 0.011727115 | 0.036943437 |
| ENSG00000138074 | 469.5453732 | 0.07155774   | 0.093843391 | 0.762522949  | 0.445747951 | 0.610751217 |
| ENSG00000138078 | 521.3310583 | 0.031167752  | 0.096509977 | 0.322948497  | 0.746734247 | 0.845576459 |
| ENSG00000138080 | 499.6166114 | -1.247573958 | 0.186420613 | -6.692253259 | 2.20E-11    | 3.73E-10    |
| ENSG00000138081 | 896.0356928 | 0.089795747  | 0.082106822 | 1.093645391  | 0.274110534 | 0.442344827 |
| ENSG00000138085 | 661.7892621 | 0.436862196  | 0.099133579 | 4.406803454  | 1.05E-05    | 7.48E-05    |

|                 |             |              |             |              |             |             |
|-----------------|-------------|--------------|-------------|--------------|-------------|-------------|
| ENSG00000138092 | 341.8201272 | -0.185326296 | 0.104098772 | -1.780292817 | 0.075028052 | 0.167474821 |
| ENSG00000138095 | 2464.028203 | -0.65829553  | 0.063940276 | -10.2954753  | 7.39E-25    | 3.26E-23    |
| ENSG00000138101 | 282.9403039 | -0.095147267 | 0.120588302 | -0.78902568  | 0.430096998 | 0.596875373 |
| ENSG00000138107 | 389.8887036 | -0.008503225 | 0.101187083 | -0.084034687 | 0.933028853 | 0.963270344 |
| ENSG00000138111 | 43.28753889 | -0.26510761  | 0.262629829 | -1.009434502 | 0.312766299 | 0.484076461 |
| ENSG00000138119 | 296.3803158 | -0.127410664 | 0.118608427 | -1.074212574 | 0.282727418 | 0.452173323 |
| ENSG00000138131 | 19.80560753 | -1.505392118 | 0.425613273 | -3.536995236 | 0.000404707 | 0.002004555 |
| ENSG00000138134 | 73.23015909 | 0.745476465  | 0.208716858 | 3.571711797  | 0.000354656 | 0.001784968 |
| ENSG00000138136 | 15.52278519 | -5.384221741 | 1.060131629 | -5.078823792 | 3.80E-07    | 3.66E-06    |
| ENSG00000138138 | 249.5218085 | -0.456225439 | 0.121705896 | -3.74858947  | 0.000177832 | 0.000964108 |
| ENSG00000138160 | 847.9821918 | -0.169839254 | 0.076346114 | -2.224595943 | 0.026108375 | 0.071938868 |
| ENSG00000138162 | 452.4907574 | -0.574569094 | 0.097002226 | -5.923256791 | 3.16E-09    | 4.12E-08    |
| ENSG00000138166 | 52.06581893 | -0.436666446 | 0.24350578  | -1.793248795 | 0.072933151 | 0.163962765 |
| ENSG00000138175 | 311.4437383 | 0.082930711  | 0.114815075 | 0.722298101  | 0.47011122  | 0.631988928 |
| ENSG00000138180 | 236.3908302 | 0.082865243  | 0.128565964 | 0.644534838  | 0.519228674 | 0.67396093  |
| ENSG00000138182 | 770.7229185 | -0.212601997 | 0.091116881 | -2.333288804 | 0.019632993 | 0.056945003 |
| ENSG00000138185 | 11.80430262 | -1.45470356  | 0.560284281 | -2.596366896 | 0.00942154  | 0.030706351 |
| ENSG00000138190 | 212.4643166 | 0.440107151  | 0.135203119 | 3.255155319  | 0.001133304 | 0.005015601 |
| ENSG00000138193 | 39.44104374 | -0.211905951 | 0.283532575 | -0.747377797 | 0.454835544 | 0.618676759 |
| ENSG00000138231 | 103.733349  | -0.26798964  | 0.176046875 | -1.522262977 | 0.127943201 | 0.253414854 |
| ENSG00000138246 | 402.1451279 | -0.063976765 | 0.10286187  | -0.621967739 | 0.533963081 | 0.685234734 |
| ENSG00000138279 | 322.0238112 | 0.432078069  | 0.106032291 | 4.074966835  | 4.60E-05    | 0.000286042 |
| ENSG00000138286 | 98.34473324 | -0.141229372 | 0.180004144 | -0.784589557 | 0.432694255 | 0.599012271 |
| ENSG00000138303 | 141.3150972 | -0.095196016 | 0.15145244  | -0.628553865 | 0.529641172 | 0.682186526 |
| ENSG00000138316 | 20.23313638 | 0.034733775  | 0.379176959 | 0.091603073  | 0.92701341  | 0.960164973 |
| ENSG00000138326 | 7154.46349  | 0.182041627  | 0.059252749 | 3.072289979  | 0.002124233 | 0.008579383 |
| ENSG00000138336 | 672.9472046 | -0.448845059 | 0.09232663  | -4.861490734 | 1.17E-06    | 1.02E-05    |
| ENSG00000138346 | 105.6415703 | -0.167556179 | 0.1773342   | -0.944861055 | 0.344729816 | 0.516469681 |
| ENSG00000138347 | 6.193688473 | -4.879230761 | 1.302775857 | -3.74525728  | 0.000180209 | 0.000975866 |
| ENSG00000138363 | 818.8225925 | 0.071829648  | 0.083981088 | 0.855307425  | 0.392380978 | 0.560693001 |
| ENSG00000138375 | 182.1485008 | -0.232620761 | 0.134633531 | -1.727807024 | 0.084022828 | 0.183533579 |
| ENSG00000138376 | 161.9458497 | -0.27546996  | 0.143848298 | -1.915003269 | 0.055492087 | 0.132342503 |
| ENSG00000138380 | 32.45792279 | -0.721094588 | 0.318226618 | -2.265978229 | 0.023452716 | 0.065738606 |
| ENSG00000138381 | 49.33549847 | -0.290354362 | 0.29112875  | -0.997340052 | 0.318599479 | 0.490203497 |
| ENSG00000138382 | 324.7402032 | 0.13686437   | 0.109805151 | 1.246429419  | 0.212606786 | 0.36779403  |
| ENSG00000138385 | 1464.168499 | 0.063243878  | 0.066075537 | 0.957145123  | 0.338494011 | 0.510448242 |
| ENSG00000138386 | 347.1716176 | 0.399988304  | 0.104382084 | 3.831963182  | 0.000127125 | 0.000716084 |
| ENSG00000138398 | 1494.100592 | -0.168580457 | 0.073306552 | -2.299664249 | 0.021467249 | 0.061163822 |
| ENSG00000138399 | 135.9093314 | -0.232907436 | 0.162615463 | -1.432258851 | 0.152069755 | 0.288353651 |
| ENSG00000138411 | 148.5449512 | 0.280061834  | 0.147097262 | 1.903922819  | 0.056920237 | 0.134901057 |
| ENSG00000138413 | 431.9484549 | 0.049315368  | 0.095025589 | 0.518969341  | 0.603782121 | 0.741439589 |
| ENSG00000138430 | 670.2545006 | 0.20281617   | 0.088176909 | 2.300105229  | 0.021442259 | 0.061144826 |
| ENSG00000138433 | 197.0874902 | 0.109736222  | 0.138832005 | 0.790424527  | 0.429279883 | 0.596126245 |
| ENSG00000138434 | 12.40198498 | -1.952664866 | 0.556618235 | -3.50808641  | 0.000451342 | 0.002210602 |
| ENSG00000138439 | 182.0892823 | 0.054709135  | 0.160485249 | 0.340898216  | 0.733180208 | 0.835693316 |
| ENSG00000138442 | 456.8157857 | -0.028625128 | 0.093343264 | -0.306665168 | 0.759098245 | 0.854860493 |
| ENSG00000138443 | 1334.118481 | -0.054203222 | 0.071641981 | -0.756584641 | 0.449298746 | 0.614298178 |
| ENSG00000138448 | 1826.267879 | -1.727116737 | 0.073125293 | -23.6185959  | 2.48E-123   | 8.72E-121   |
| ENSG00000138449 | 19.15366345 | -2.404761522 | 0.487945464 | -4.928340766 | 8.29E-07    | 7.49E-06    |
| ENSG00000138459 | 94.22221972 | -0.193921753 | 0.187235167 | -1.035712233 | 0.300336413 | 0.470693473 |

|                 |             |              |             |              |             |             |
|-----------------|-------------|--------------|-------------|--------------|-------------|-------------|
| ENSG00000138463 | 58.91099151 | -0.126730709 | 0.231066728 | -0.548459357 | 0.583376529 | 0.725450611 |
| ENSG00000138468 | 152.542824  | -0.308459837 | 0.147574873 | -2.090192127 | 0.036600544 | 0.094875041 |
| ENSG00000138495 | 399.2271795 | 0.054122308  | 0.118161629 | 0.458036238  | 0.646926407 | 0.772538913 |
| ENSG00000138496 | 217.1447842 | 0.805086465  | 0.130004926 | 6.192738132  | 5.91E-10    | 8.52E-09    |
| ENSG00000138592 | 573.1208736 | -0.132524797 | 0.087138415 | -1.520853875 | 0.128296511 | 0.253993248 |
| ENSG00000138593 | 447.0918674 | 0.059604056  | 0.099505882 | 0.599000326  | 0.549172667 | 0.69718384  |
| ENSG00000138594 | 328.2453201 | -0.242043339 | 0.10685382  | -2.265181903 | 0.023501519 | 0.065814562 |
| ENSG00000138600 | 277.8953981 | -0.358104755 | 0.1198043   | -2.989080977 | 0.00279818  | 0.010876046 |
| ENSG00000138604 | 84.52464713 | -1.025318588 | 0.209211624 | -4.90086816  | 9.54E-07    | 8.49E-06    |
| ENSG00000138606 | 34.45604685 | 0.458459779  | 0.317889241 | 1.442199732  | 0.149246036 | 0.283957615 |
| ENSG00000138613 | 55.57049787 | -0.449444447 | 0.235813757 | -1.905929716 | 0.056659325 | 0.134600632 |
| ENSG00000138614 | 228.7601222 | 0.198673023  | 0.12146891  | 1.635587445  | 0.10192596  | 0.212868563 |
| ENSG00000138617 | 44.44878239 | 0.228330541  | 0.25807712  | 0.884737637  | 0.376298151 | 0.546116348 |
| ENSG00000138621 | 46.78933691 | -0.043691042 | 0.251573228 | -0.173671271 | 0.862123817 | 0.921632668 |
| ENSG00000138623 | 15.65159672 | -0.172787171 | 0.442796179 | -0.390218296 | 0.696375134 | 0.809436951 |
| ENSG00000138629 | 202.1328972 | 0.320717878  | 0.132054437 | 2.428679301  | 0.01515393  | 0.045916146 |
| ENSG00000138640 | 401.9584394 | 0.509725179  | 0.102316269 | 4.981858566  | 6.30E-07    | 5.83E-06    |
| ENSG00000138641 | 10.78146837 | 0.109674265  | 0.517916482 | 0.211760523  | 0.832293868 | 0.90196204  |
| ENSG00000138642 | 69.34693122 | 1.445872485  | 0.226656096 | 6.379146703  | 1.78E-10    | 2.73E-09    |
| ENSG00000138646 | 49.10746158 | 2.701548252  | 0.307481581 | 8.786049054  | 1.55E-18    | 4.90E-17    |
| ENSG00000138650 | 520.3034565 | -0.809102661 | 0.093444757 | -8.658620213 | 4.78E-18    | 1.43E-16    |
| ENSG00000138653 | 9.482782367 | -0.504921912 | 0.576401836 | -0.875989423 | 0.381035784 | 0.550538001 |
| ENSG00000138658 | 186.3916034 | -0.224873178 | 0.151067356 | -1.488562345 | 0.136602653 | 0.266138346 |
| ENSG00000138660 | 116.0648954 | 0.039079857  | 0.164494358 | 0.23757567   | 0.812210222 | 0.889524775 |
| ENSG00000138663 | 174.1097182 | 0.187641408  | 0.138657127 | 1.353276335  | 0.175967367 | 0.320764806 |
| ENSG00000138668 | 4230.390886 | 0.269597734  | 0.065422091 | 4.120897528  | 3.77E-05    | 0.000238799 |
| ENSG00000138674 | 1569.290824 | 0.169986854  | 0.076296831 | 2.227967418  | 0.025882688 | 0.071415069 |
| ENSG00000138685 | 165.6895812 | -0.235016032 | 0.14288038  | -1.644844668 | 0.100001848 | 0.209691888 |
| ENSG00000138686 | 171.6612564 | -0.054562015 | 0.14315228  | -0.381146676 | 0.703094414 | 0.814114448 |
| ENSG00000138688 | 599.7158275 | -0.307614437 | 0.098830775 | -3.112536915 | 0.001854868 | 0.007674619 |
| ENSG00000138698 | 170.0258832 | 0.199782974  | 0.137897642 | 1.448777312  | 0.147399782 | 0.281627412 |
| ENSG00000138709 | 302.4987671 | -0.125951535 | 0.111798718 | -1.126591952 | 0.259915044 | 0.425974404 |
| ENSG00000138722 | 865.7444833 | -3.604490815 | 0.103292837 | -34.89584489 | 8.60E-267   | 1.01E-263   |
| ENSG00000138735 | 26.91303458 | -0.791035973 | 0.3427828   | -2.307688639 | 0.02101646  | 0.060159869 |
| ENSG00000138738 | 123.2679366 | -0.530495969 | 0.162166557 | -3.271303149 | 0.001070531 | 0.004773888 |
| ENSG00000138744 | 216.4763659 | 0.266655013  | 0.131883943 | 2.021891432  | 0.043187569 | 0.108875769 |
| ENSG00000138750 | 309.1991701 | 0.002659353  | 0.110323421 | 0.024105064  | 0.980768804 | 0.990179984 |
| ENSG00000138756 | 191.6051958 | -0.272360942 | 0.13530993  | -2.012867358 | 0.044128585 | 0.11057883  |
| ENSG00000138757 | 890.8113001 | -0.064993651 | 0.073324061 | -0.886389138 | 0.37540787  | 0.545387771 |
| ENSG00000138758 | 851.0727724 | -0.130722916 | 0.080432164 | -1.625256739 | 0.104107865 | 0.216267847 |
| ENSG00000138759 | 319.0567648 | -0.969005382 | 0.111279699 | -8.707836108 | 3.10E-18    | 9.46E-17    |
| ENSG00000138760 | 977.9667363 | 0.592745139  | 0.077820243 | 7.616850295  | 2.60E-14    | 5.98E-13    |
| ENSG00000138764 | 140.412852  | -0.261407235 | 0.158801886 | -1.646121732 | 0.099738699 | 0.209324691 |
| ENSG00000138767 | 301.2488156 | -0.007396629 | 0.111046733 | -0.066608257 | 0.946893572 | 0.97059355  |
| ENSG00000138768 | 786.0208182 | 0.175159334  | 0.083877389 | 2.088278335  | 0.036772735 | 0.095215964 |
| ENSG00000138769 | 8.783817103 | 0.234315736  | 0.625306667 | 0.374721313  | 0.70786774  | 0.816842039 |
| ENSG00000138771 | 640.6853181 | -1.793344435 | 0.094975183 | -18.88224252 | 1.60E-79    | 2.88E-77    |
| ENSG00000138777 | 246.1368919 | -0.257684943 | 0.119845061 | -2.150150711 | 0.031543295 | 0.083838916 |
| ENSG00000138778 | 1353.869681 | -0.786303488 | 0.072510673 | -10.84396901 | 2.13E-27    | 1.05E-25    |
| ENSG00000138780 | 232.9822673 | -0.48578463  | 0.123733575 | -3.926053467 | 8.64E-05    | 0.000504354 |

|                 |             |              |             |              |             |             |
|-----------------|-------------|--------------|-------------|--------------|-------------|-------------|
| ENSG00000138785 | 123.4998197 | 0.039040856  | 0.165455593 | 0.235959727  | 0.813463921 | 0.890417494 |
| ENSG00000138794 | 75.61242219 | -0.254827898 | 0.213723896 | -1.192322909 | 0.233134655 | 0.393279993 |
| ENSG00000138796 | 306.7103551 | -0.125566959 | 0.11547112  | -1.087431722 | 0.276846058 | 0.445411754 |
| ENSG00000138801 | 411.4215495 | 0.327240357  | 0.099609708 | 3.285225561  | 0.001019008 | 0.004570243 |
| ENSG00000138802 | 614.2436626 | 0.206453917  | 0.095304391 | 2.16625819   | 0.030291463 | 0.081141147 |
| ENSG00000138814 | 222.4440841 | 0.279089962  | 0.127626085 | 2.186778372  | 0.028758707 | 0.077843973 |
| ENSG00000138821 | 180.4431511 | -0.253988641 | 0.139065686 | -1.826393324 | 0.067791037 | 0.155293655 |
| ENSG00000138829 | 67.75648623 | -5.053766693 | 0.470011234 | -10.75243809 | 5.77E-27    | 2.78E-25    |
| ENSG00000138834 | 358.3672113 | 0.142932335  | 0.114513422 | 1.248171016  | 0.211968436 | 0.367051358 |
| ENSG00000138835 | 901.4567078 | 0.576911695  | 0.096864226 | 5.955879904  | 2.59E-09    | 3.41E-08    |
| ENSG00000138867 | 496.1478474 | 0.016910976  | 0.103222199 | 0.163830805  | 0.86986434  | 0.927577954 |
| ENSG00000138942 | 80.55959547 | 0.056359525  | 0.217080074 | 0.259625511  | 0.795152656 | 0.87776105  |
| ENSG00000139044 | 77.53466963 | 1.331531011  | 0.213449697 | 6.238148984  | 4.43E-10    | 6.46E-09    |
| ENSG00000139083 | 233.8519851 | -0.426973489 | 0.122664284 | -3.48082976  | 0.000499863 | 0.002422904 |
| ENSG00000139112 | 109.690993  | 0.213545246  | 0.170845822 | 1.249929578  | 0.211325273 | 0.366298879 |
| ENSG00000139116 | 226.2593461 | 0.346320585  | 0.125787059 | 2.753229045  | 0.00590106  | 0.020575238 |
| ENSG00000139117 | 171.9239006 | -0.091715568 | 0.141139152 | -0.649823714 | 0.515806099 | 0.671096242 |
| ENSG00000139131 | 162.9304125 | 0.054007047  | 0.146356751 | 0.369009604  | 0.712120567 | 0.820132623 |
| ENSG00000139133 | 25.56561679 | -0.753407103 | 0.347718863 | -2.166713352 | 0.030256718 | 0.081074426 |
| ENSG00000139144 | 426.1231672 | 1.325321255  | 0.105040218 | 12.61727443  | 1.70E-36    | 1.16E-34    |
| ENSG00000139146 | 518.3927713 | -0.056926862 | 0.093381503 | -0.609616036 | 0.542116186 | 0.691527975 |
| ENSG00000139154 | 1094.622972 | 0.445274074  | 0.074299396 | 5.992970309  | 2.06E-09    | 2.76E-08    |
| ENSG00000139160 | 10.66814858 | -0.57681478  | 0.543004031 | -1.062266111 | 0.288114894 | 0.45813334  |
| ENSG00000139163 | 386.7831176 | -0.141737856 | 0.1006237   | -1.40859316  | 0.158955502 | 0.297514716 |
| ENSG00000139168 | 646.4586084 | -0.04325495  | 0.082769659 | -0.522594277 | 0.601256624 | 0.739437208 |
| ENSG00000139173 | 148.7342405 | 0.263016002  | 0.157718999 | 1.667624093  | 0.095390372 | 0.202348016 |
| ENSG00000139174 | 262.9318795 | -0.786341018 | 0.119037032 | -6.605852014 | 3.95E-11    | 6.57E-10    |
| ENSG00000139178 | 120.458314  | -0.215575488 | 0.170299588 | -1.265860302 | 0.205563101 | 0.359102709 |
| ENSG00000139180 | 50.27782006 | -0.594117368 | 0.259731302 | -2.287430756 | 0.022170693 | 0.062662318 |
| ENSG00000139182 | 137.7148577 | 0.280599789  | 0.157819916 | 1.777974518  | 0.07540804  | 0.168189384 |
| ENSG00000139190 | 96.04124149 | 0.273605403  | 0.185357026 | 1.476099443  | 0.139917198 | 0.270793178 |
| ENSG00000139197 | 284.1249439 | -0.112940997 | 0.113107642 | -0.998526668 | 0.31802404  | 0.48988389  |
| ENSG00000139200 | 249.2620025 | 0.488062835  | 0.125101619 | 3.901331089  | 9.57E-05    | 0.000553236 |
| ENSG00000139211 | 25.27206732 | -0.761133044 | 0.353759374 | -2.151555833 | 0.031432354 | 0.083601154 |
| ENSG00000139218 | 1056.575473 | -0.214057769 | 0.072219657 | -2.96398206  | 0.00303686  | 0.011668154 |
| ENSG00000139219 | 107.9827082 | -1.151576283 | 0.184486253 | -6.242070947 | 4.32E-10    | 6.31E-09    |
| ENSG00000139233 | 150.4592621 | 0.205303195  | 0.146744013 | 1.399056702  | 0.16179598  | 0.301505457 |
| ENSG00000139239 | 73.92246292 | 0.372435821  | 0.204692646 | 1.819488035  | 0.068837007 | 0.156998447 |
| ENSG00000139263 | 114.1988948 | -1.71332335  | 0.182499813 | -9.388082783 | 6.11E-21    | 2.18E-19    |
| ENSG00000139266 | 172.5516727 | 0.204018462  | 0.140932408 | 1.44763341   | 0.147719602 | 0.281855101 |
| ENSG00000139269 | 10.31680001 | -1.866642786 | 0.604325676 | -3.088802711 | 0.002009648 | 0.008211033 |
| ENSG00000139289 | 35.54521255 | -1.654196805 | 0.320826276 | -5.156051514 | 2.52E-07    | 2.50E-06    |
| ENSG00000139291 | 62.37732469 | -0.288473775 | 0.226778457 | -1.272051051 | 0.203354981 | 0.356353222 |
| ENSG00000139292 | 17.86341798 | -6.452938219 | 1.224256143 | -5.27090532  | 1.36E-07    | 1.40E-06    |
| ENSG00000139318 | 1302.424404 | -2.431943339 | 0.085891756 | -28.31404841 | 2.32E-176   | 1.55E-173   |
| ENSG00000139323 | 153.4491136 | -1.561581711 | 0.160192497 | -9.748157603 | 1.88E-22    | 7.21E-21    |
| ENSG00000139324 | 161.0105832 | -0.335632081 | 0.15315974  | -2.191385812 | 0.028423885 | 0.077064333 |
| ENSG00000139329 | 729.2032144 | 3.103550688  | 0.09981556  | 31.09285444  | 3.01E-212   | 2.64E-209   |
| ENSG00000139330 | 14.92766382 | -2.488980483 | 0.561207359 | -4.43504605  | 9.21E-06    | 6.64E-05    |
| ENSG00000139343 | 1749.539752 | 0.287947047  | 0.061831702 | 4.656948385  | 3.21E-06    | 2.56E-05    |

|                 |             |              |             |              |             |             |
|-----------------|-------------|--------------|-------------|--------------|-------------|-------------|
| ENSG00000139350 | 235.2126023 | -0.379093682 | 0.127205824 | -2.980159799 | 0.002880981 | 0.011154667 |
| ENSG00000139354 | 235.026175  | -0.103249264 | 0.122372853 | -0.843726868 | 0.39882205  | 0.56691493  |
| ENSG00000139370 | 99.91537317 | 0.577330214  | 0.184076069 | 3.136367582  | 0.001710547 | 0.007159728 |
| ENSG00000139372 | 80.06198585 | -0.311160772 | 0.204313676 | -1.522956163 | 0.127769673 | 0.253106839 |
| ENSG00000139405 | 326.5818963 | -0.112768182 | 0.109395171 | -1.030833273 | 0.302619012 | 0.47321488  |
| ENSG00000139410 | 41.19344415 | -0.619380989 | 0.279649474 | -2.214847682 | 0.026770521 | 0.073460737 |
| ENSG00000139428 | 161.4639323 | 0.087240422  | 0.148274036 | 0.588372885  | 0.556282034 | 0.703356436 |
| ENSG00000139433 | 159.8240239 | 0.395017803  | 0.146572537 | 2.695032852  | 0.007038169 | 0.023926709 |
| ENSG00000139436 | 298.9702652 | -0.026190703 | 0.114683907 | -0.228372958 | 0.81935631  | 0.893395096 |
| ENSG00000139437 | 378.1347653 | -0.029826005 | 0.111611354 | -0.267230923 | 0.789291369 | 0.87424506  |
| ENSG00000139438 | 72.92485991 | -0.438571497 | 0.213074857 | -2.058297736 | 0.039561561 | 0.100948456 |
| ENSG00000139445 | 90.96663316 | -2.039054447 | 0.21235026  | -9.602316677 | 7.82E-22    | 2.91E-20    |
| ENSG00000139496 | 1151.180551 | 0.101144887  | 0.068658151 | 1.473166482  | 0.140706151 | 0.271833214 |
| ENSG00000139505 | 184.8245222 | -0.200363652 | 0.139737351 | -1.433858954 | 0.151612517 | 0.28760311  |
| ENSG00000139514 | 1464.159157 | -0.14409774  | 0.071372381 | -2.018956599 | 0.043491731 | 0.109361608 |
| ENSG00000139517 | 104.7453738 | -0.012971518 | 0.178343203 | -0.072733461 | 0.942018221 | 0.967997802 |
| ENSG00000139531 | 180.5129855 | -0.326512343 | 0.145720599 | -2.240673891 | 0.025047207 | 0.069396077 |
| ENSG00000139546 | 104.7423334 | -0.121740467 | 0.174945056 | -0.695878293 | 0.486505052 | 0.646908034 |
| ENSG00000139579 | 249.7020222 | 0.553040782  | 0.119700703 | 4.620196627  | 3.83E-06    | 3.01E-05    |
| ENSG00000139613 | 1344.380778 | 0.230008969  | 0.069565277 | 3.30637612   | 0.000945111 | 0.00427155  |
| ENSG00000139618 | 578.6534869 | -0.638066832 | 0.092696003 | -6.883434116 | 5.84E-12    | 1.06E-10    |
| ENSG00000139620 | 160.5359771 | 0.140616684  | 0.155570536 | 0.903877353  | 0.366060439 | 0.537374197 |
| ENSG00000139624 | 421.3619351 | 0.009746397  | 0.09928772  | 0.098163168  | 0.921802729 | 0.956832011 |
| ENSG00000139625 | 443.9216535 | -0.146780821 | 0.096634386 | -1.518929516 | 0.128780239 | 0.254677743 |
| ENSG00000139629 | 103.2080101 | -0.459348961 | 0.176914675 | -2.596443509 | 0.009419439 | 0.030706351 |
| ENSG00000139631 | 79.4680149  | -0.066721473 | 0.200998506 | -0.331950096 | 0.739926942 | 0.840986629 |
| ENSG00000139636 | 38.83484786 | -0.044028404 | 0.291757888 | -0.150907329 | 0.880048819 | 0.934004754 |
| ENSG00000139641 | 631.4020712 | 0.048713295  | 0.091724443 | 0.53108303   | 0.595361243 | 0.735083008 |
| ENSG00000139644 | 1336.876146 | 0.169471013  | 0.072267335 | 2.3450569    | 0.019024176 | 0.055419453 |
| ENSG00000139645 | 709.1583562 | -0.187111878 | 0.080645885 | -2.320166459 | 0.020331874 | 0.058573535 |
| ENSG00000139651 | 332.0667893 | -0.047409979 | 0.111846649 | -0.423883765 | 0.671650585 | 0.790703634 |
| ENSG00000139668 | 211.9230448 | -0.450388754 | 0.132527588 | -3.39845282  | 0.000677682 | 0.003176307 |
| ENSG00000139684 | 559.6549428 | 0.028360117  | 0.099051266 | 0.286317564  | 0.774634907 | 0.865083113 |
| ENSG00000139687 | 339.2031645 | 0.245646882  | 0.103527841 | 2.37276155   | 0.017655658 | 0.052179471 |
| ENSG00000139697 | 1354.713444 | 0.428817902  | 0.070454404 | 6.086459864  | 1.15E-09    | 1.59E-08    |
| ENSG00000139718 | 782.2121241 | -0.090531536 | 0.07890221  | -1.147389098 | 0.251220845 | 0.415555724 |
| ENSG00000139719 | 89.19094297 | -0.285263333 | 0.200898639 | -1.419936609 | 0.155626137 | 0.293122149 |
| ENSG00000139722 | 157.9922486 | 0.00097882   | 0.159299778 | 0.006144514  | 0.995097418 | 0.997939133 |
| ENSG00000139725 | 239.6991276 | -0.26821691  | 0.124227555 | -2.159077424 | 0.030844161 | 0.08240166  |
| ENSG00000139726 | 510.2865441 | 0.320860572  | 0.088566608 | 3.622816556  | 0.000291412 | 0.001499989 |
| ENSG00000139734 | 364.6817551 | -0.169827332 | 0.102625545 | -1.654825134 | 0.097959974 | 0.20636529  |
| ENSG00000139746 | 1531.995459 | 0.152876894  | 0.066174836 | 2.310196811  | 0.020877261 | 0.059812947 |
| ENSG00000139793 | 166.2298954 | -0.01144431  | 0.14584109  | -0.078471092 | 0.937453324 | 0.965779747 |
| ENSG00000139800 | 9.895909037 | -3.050986146 | 0.750234073 | -4.066712316 | 4.77E-05    | 0.000295185 |
| ENSG00000139826 | 88.69019199 | 0.032034828  | 0.193639574 | 0.165435334  | 0.868601344 | 0.926794006 |
| ENSG00000139832 | 15.38158372 | 0.409114381  | 0.46206457  | 0.885405218  | 0.375938119 | 0.545875828 |
| ENSG00000139835 | 95.79832192 | 0.202811139  | 0.186722829 | 1.08616145   | 0.277407569 | 0.446004822 |
| ENSG00000139842 | 858.5383973 | -0.047578982 | 0.079710905 | -0.596894265 | 0.550577976 | 0.698389817 |
| ENSG00000139865 | 9.468608941 | -0.58184444  | 0.55920228  | -1.040490107 | 0.298112258 | 0.468750272 |
| ENSG00000139880 | 103.5861126 | 0.235555422  | 0.173545997 | 1.3573083    | 0.174683271 | 0.319086594 |



|                 |             |              |             |              |             |             |
|-----------------|-------------|--------------|-------------|--------------|-------------|-------------|
| ENSG00000139899 | 29.00524668 | -0.263958124 | 0.325687811 | -0.810463626 | 0.417673763 | 0.58565216  |
| ENSG00000139910 | 211.6282692 | 1.083230521  | 0.137686694 | 7.867358041  | 3.62E-15    | 8.79E-14    |
| ENSG00000139921 | 203.8916571 | 0.119501801  | 0.139946868 | 0.853908361  | 0.393155767 | 0.561290936 |
| ENSG00000139926 | 125.2186086 | -0.393220151 | 0.168290661 | -2.336553606 | 0.019462407 | 0.056473546 |
| ENSG00000139971 | 30.14498385 | 0.054202023  | 0.33258098  | 0.16297391   | 0.870538977 | 0.927945136 |
| ENSG00000139973 | 11.50137932 | -2.404126485 | 0.613743992 | -3.917148707 | 8.96E-05    | 0.000521394 |
| ENSG00000139974 | 45.47880233 | -0.653636678 | 0.260303222 | -2.511058733 | 0.012036967 | 0.03777553  |
| ENSG00000139977 | 132.86478   | 0.047659599  | 0.159459823 | 0.298881549  | 0.765030426 | 0.858474388 |
| ENSG00000139990 | 768.7960714 | -0.651488844 | 0.082809321 | -7.867337144 | 3.62E-15    | 8.79E-14    |
| ENSG00000139998 | 134.0537676 | 0.578267971  | 0.156770614 | 3.688624778  | 0.000225469 | 0.001190665 |
| ENSG00000140006 | 72.77162774 | 9.30E-05     | 0.206808467 | 0.000449855  | 0.999641068 | 0.999854605 |
| ENSG00000140025 | 29.52940612 | -0.81371977  | 0.356035652 | -2.285500804 | 0.022283479 | 0.062905151 |
| ENSG00000140043 | 56.7217275  | -0.617384401 | 0.256142599 | -2.410315207 | 0.015938743 | 0.047963052 |
| ENSG00000140044 | 43.62335703 | -2.947488846 | 0.363263478 | -8.113914629 | 4.90E-16    | 1.28E-14    |
| ENSG00000140057 | 34.71486644 | -0.874362339 | 0.335227233 | -2.608267622 | 0.009100178 | 0.029797248 |
| ENSG00000140090 | 34.25757442 | -0.57961558  | 0.306352673 | -1.891987995 | 0.05849258  | 0.137859946 |
| ENSG00000140092 | 17.47103942 | -1.611832806 | 0.483913944 | -3.330825299 | 0.000865889 | 0.003947792 |
| ENSG00000140104 | 38.10346012 | -0.046910931 | 0.289247757 | -0.162182524 | 0.871162122 | 0.928186766 |
| ENSG00000140105 | 709.3448729 | -0.783612161 | 0.085875146 | -9.12501694  | 7.17E-20    | 2.40E-18    |
| ENSG00000140153 | 172.7513145 | -0.029999813 | 0.148045701 | -0.202638865 | 0.839417311 | 0.906604257 |
| ENSG00000140157 | 371.3744619 | -0.036940064 | 0.103949684 | -0.355364856 | 0.722316273 | 0.827735087 |
| ENSG00000140199 | 166.2701774 | -0.184355044 | 0.14361539  | -1.283671923 | 0.199256772 | 0.351186936 |
| ENSG00000140259 | 369.9080698 | 0.006705828  | 0.105910559 | 0.06331595   | 0.949514915 | 0.972060789 |
| ENSG00000140262 | 758.4576492 | -0.015187397 | 0.081160348 | -0.187128292 | 0.851560046 | 0.914865313 |
| ENSG00000140263 | 178.3151872 | 0.497366724  | 0.137511782 | 3.616902622  | 0.000298149 | 0.001530181 |
| ENSG00000140264 | 542.235303  | 0.123261555  | 0.179313338 | 0.687408734  | 0.491825195 | 0.651295106 |
| ENSG00000140265 | 153.1922274 | -0.461067983 | 0.152265579 | -3.028051287 | 0.002461363 | 0.009761369 |
| ENSG00000140280 | 31.86584134 | 0.328951633  | 0.319729512 | 1.02884351   | 0.303553217 | 0.474358887 |
| ENSG00000140284 | 110.1059816 | 0.605787025  | 0.174254344 | 3.476452924  | 0.000508093 | 0.002456018 |
| ENSG00000140299 | 380.2057627 | -0.253094111 | 0.10471577  | -2.41696271  | 0.01565062  | 0.047207272 |
| ENSG00000140307 | 206.0402101 | -0.079720663 | 0.129379839 | -0.616175315 | 0.537778819 | 0.688558843 |
| ENSG00000140319 | 1517.316435 | 0.229531783  | 0.083347943 | 2.753898584  | 0.005889001 | 0.020553444 |
| ENSG00000140320 | 818.8011031 | 0.25353072   | 0.082438186 | 3.075403935  | 0.002102176 | 0.00851233  |
| ENSG00000140323 | 18.3272997  | -0.133021399 | 0.405475117 | -0.328063039 | 0.742864    | 0.842824538 |
| ENSG00000140326 | 114.02828   | 0.293095643  | 0.169865997 | 1.725452109  | 0.084446027 | 0.184194619 |
| ENSG00000140332 | 466.5736827 | -0.272794642 | 0.094985543 | -2.871959613 | 0.004079351 | 0.015059827 |
| ENSG00000140350 | 1424.656119 | 0.236695358  | 0.070386562 | 3.362791877  | 0.000771585 | 0.003564109 |
| ENSG00000140365 | 588.846952  | 0.339092351  | 0.10077519  | 3.364839615  | 0.000765882 | 0.003538927 |
| ENSG00000140367 | 170.553359  | -0.111555545 | 0.142473294 | -0.782992666 | 0.433631419 | 0.59982477  |
| ENSG00000140368 | 12.27702876 | 3.209224512  | 0.662366315 | 4.845090154  | 1.27E-06    | 1.10E-05    |
| ENSG00000140374 | 355.6010231 | -0.218664053 | 0.109705424 | -1.993192721 | 0.046240348 | 0.11461764  |
| ENSG00000140382 | 440.2013689 | -0.070655766 | 0.093817344 | -0.753120516 | 0.451377497 | 0.616540227 |
| ENSG00000140386 | 301.5567457 | -0.292670808 | 0.109986318 | -2.660974681 | 0.007791482 | 0.026152196 |
| ENSG00000140391 | 865.0900007 | -0.10520967  | 0.084473608 | -1.245473856 | 0.21295762  | 0.36831023  |
| ENSG00000140395 | 608.4510982 | 0.495800513  | 0.085483593 | 5.799949423  | 6.63E-09    | 8.39E-08    |
| ENSG00000140396 | 645.0326415 | -0.297339993 | 0.083876444 | -3.544976148 | 0.000392649 | 0.001952402 |
| ENSG00000140398 | 90.48727849 | 0.254909059  | 0.187724304 | 1.357890556  | 0.174498414 | 0.318907337 |
| ENSG00000140400 | 324.3231453 | 0.290008381  | 0.117782046 | 2.462246087  | 0.01380699  | 0.042381686 |
| ENSG00000140406 | 378.9169109 | 0.188324679  | 0.10209318  | 1.844635247  | 0.065090616 | 0.15030871  |
| ENSG00000140416 | 361.6118454 | -1.320251525 | 0.110336903 | -11.96563877 | 5.38E-33    | 3.26E-31    |

|                 |             |              |             |              |             |             |
|-----------------|-------------|--------------|-------------|--------------|-------------|-------------|
| ENSG00000140443 | 1490.974084 | -0.672041025 | 0.064968584 | -10.34409227 | 4.45E-25    | 1.99E-23    |
| ENSG00000140450 | 152.2632168 | -1.611988879 | 0.162633373 | -9.911796385 | 3.70E-23    | 1.46E-21    |
| ENSG00000140451 | 110.3811374 | -0.233967893 | 0.184649157 | -1.267094288 | 0.205121578 | 0.358643615 |
| ENSG00000140455 | 286.5315932 | -0.206296079 | 0.119351608 | -1.728473399 | 0.083903386 | 0.183409721 |
| ENSG00000140463 | 141.1623359 | -0.241267846 | 0.163283986 | -1.477596498 | 0.139515812 | 0.270314292 |
| ENSG00000140464 | 535.0831203 | 0.617499959  | 0.089177279 | 6.924409029  | 4.38E-12    | 8.10E-11    |
| ENSG00000140465 | 13.22134795 | -3.080781409 | 0.656197645 | -4.69489861  | 2.67E-06    | 2.17E-05    |
| ENSG00000140471 | 90.80595023 | 0.097464825  | 0.186689856 | 0.522068139  | 0.601622889 | 0.739822877 |
| ENSG00000140474 | 191.5330592 | 0.636525634  | 0.14719469  | 4.324379047  | 1.53E-05    | 0.000105275 |
| ENSG00000140479 | 368.1171581 | 0.144957136  | 0.113085249 | 1.281839466  | 0.199898967 | 0.351965503 |
| ENSG00000140481 | 31.45549488 | -2.013019295 | 0.355444924 | -5.663378929 | 1.48E-08    | 1.78E-07    |
| ENSG00000140497 | 379.6163008 | 0.200483244  | 0.103291302 | 1.940949912  | 0.052264353 | 0.126274057 |
| ENSG00000140511 | 105.7190759 | -3.006462847 | 0.243021272 | -12.37119212 | 3.74E-35    | 2.46E-33    |
| ENSG00000140521 | 789.4237046 | 0.154273291  | 0.085918132 | 1.795584784  | 0.072560578 | 0.163316525 |
| ENSG00000140525 | 1118.45841  | -0.063426558 | 0.073588304 | -0.861910861 | 0.388736572 | 0.557259172 |
| ENSG00000140526 | 373.3574332 | -0.580444478 | 0.106225979 | -5.464242196 | 4.65E-08    | 5.17E-07    |
| ENSG00000140534 | 791.7885912 | -0.082152547 | 0.081450747 | -1.008616243 | 0.313158714 | 0.484304796 |
| ENSG00000140543 | 22.52271218 | -0.415306151 | 0.372939478 | -1.113602006 | 0.265449966 | 0.432171496 |
| ENSG00000140545 | 1456.949161 | -1.756517561 | 0.085569075 | -20.527481   | 1.22E-93    | 2.82E-91    |
| ENSG00000140548 | 204.37095   | 0.027054043  | 0.136360876 | 0.198400334  | 0.842731856 | 0.908748678 |
| ENSG00000140553 | 760.955124  | 0.373023483  | 0.077165453 | 4.834073634  | 1.34E-06    | 1.15E-05    |
| ENSG00000140564 | 542.0528529 | -0.091536767 | 0.089299125 | -1.025057824 | 0.305335904 | 0.476296885 |
| ENSG00000140575 | 632.9149485 | 0.022337374  | 0.090628438 | 0.246472014  | 0.805316866 | 0.884947666 |
| ENSG00000140577 | 563.9413403 | 0.256840464  | 0.085512184 | 3.003554039  | 0.002668462 | 0.010449925 |
| ENSG00000140598 | 183.5667428 | 0.103937855  | 0.134565536 | 0.772395798  | 0.439880042 | 0.605131226 |
| ENSG00000140600 | 18.64062728 | -0.224666977 | 0.40292986  | -0.557583339 | 0.577128936 | 0.721000548 |
| ENSG00000140612 | 1102.55462  | 0.156986615  | 0.071077749 | 2.208660466  | 0.027198266 | 0.074372989 |
| ENSG00000140632 | 890.8982207 | -0.026974843 | 0.074906115 | -0.36011537  | 0.71876086  | 0.824903181 |
| ENSG00000140650 | 415.5523841 | 0.316680709  | 0.101527576 | 3.119159569  | 0.001813677 | 0.007515257 |
| ENSG00000140682 | 166.7885161 | -0.413192933 | 0.142112197 | -2.907512109 | 0.003643162 | 0.013654083 |
| ENSG00000140688 | 303.1674846 | 0.312999246  | 0.119860902 | 2.611353993  | 0.009018449 | 0.029577901 |
| ENSG00000140691 | 53.75956756 | -0.094309325 | 0.245387892 | -0.384327539 | 0.700735699 | 0.812215064 |
| ENSG00000140694 | 374.061667  | 0.033806281  | 0.115811124 | 0.291908754  | 0.77035639  | 0.862680103 |
| ENSG00000140718 | 394.4537614 | -0.026183933 | 0.10419851  | -0.251288942 | 0.801590724 | 0.881749796 |
| ENSG00000140740 | 1366.009516 | 0.027208885  | 0.076176495 | 0.357182156  | 0.720955444 | 0.826715193 |
| ENSG00000140743 | 148.7731703 | 0.274126529  | 0.15016496  | 1.825502628  | 0.067925215 | 0.155524938 |
| ENSG00000140750 | 1038.585904 | 0.516366607  | 0.073878161 | 6.98943504   | 2.76E-12    | 5.22E-11    |
| ENSG00000140795 | 6.025220016 | -3.329482871 | 1.005857492 | -3.310094023 | 0.000932646 | 0.004224729 |
| ENSG00000140807 | 124.9345751 | -0.316560996 | 0.162576263 | -1.947153847 | 0.051516293 | 0.124730741 |
| ENSG00000140829 | 1016.264164 | 0.676362456  | 0.080301867 | 8.422748825  | 3.68E-17    | 1.02E-15    |
| ENSG00000140830 | 120.0581901 | 0.866776895  | 0.167846971 | 5.164090172  | 2.42E-07    | 2.40E-06    |
| ENSG00000140836 | 1857.583958 | -0.357771156 | 0.066227475 | -5.402156093 | 6.58E-08    | 7.15E-07    |
| ENSG00000140848 | 83.38479381 | -0.571124901 | 0.196790395 | -2.90219907  | 0.00370553  | 0.013832468 |
| ENSG00000140853 | 112.4260304 | 1.637174279  | 0.186069706 | 8.798714828  | 1.38E-18    | 4.40E-17    |
| ENSG00000140854 | 249.0292984 | -0.225376536 | 0.12813389  | -1.758914339 | 0.078592059 | 0.174105781 |
| ENSG00000140859 | 148.6936659 | 0.28717974   | 0.148213607 | 1.937607121  | 0.052671173 | 0.127038456 |
| ENSG00000140905 | 19.50993605 | 0.116558401  | 0.394492042 | 0.295464517  | 0.767639055 | 0.860096179 |
| ENSG00000140931 | 182.9994992 | 0.234861698  | 0.139942973 | 1.678267176  | 0.093294953 | 0.198773579 |
| ENSG00000140939 | 174.512576  | 1.203473065  | 0.153516745 | 7.839360217  | 4.53E-15    | 1.09E-13    |
| ENSG00000140941 | 340.0826775 | -0.650709341 | 0.109307041 | -5.953041378 | 2.63E-09    | 3.47E-08    |

|                 |             |              |             |              |             |             |
|-----------------|-------------|--------------|-------------|--------------|-------------|-------------|
| ENSG00000140943 | 643.3308193 | 0.105643716  | 0.083305415 | 1.268149444  | 0.204744587 | 0.358155148 |
| ENSG00000140948 | 483.8530165 | -1.018155193 | 0.095916257 | -10.61504302 | 2.54E-26    | 1.20E-24    |
| ENSG00000140950 | 85.75646564 | 0.124875698  | 0.197995645 | 0.630699217  | 0.528237211 | 0.680934946 |
| ENSG00000140961 | 42.9168572  | 0.495339347  | 0.275847881 | 1.795697485  | 0.072542642 | 0.163302323 |
| ENSG00000140983 | 247.0876134 | 0.117778597  | 0.12027381  | 0.979253895  | 0.327454545 | 0.499810278 |
| ENSG00000140987 | 165.9116121 | 0.229579596  | 0.141761459 | 1.619478225  | 0.105344408 | 0.218402811 |
| ENSG00000140988 | 7514.667729 | 0.235537827  | 0.065205787 | 3.612222749  | 0.000303584 | 0.001555229 |
| ENSG00000140990 | 1537.834894 | 0.405270137  | 0.07523243  | 5.386907454  | 7.17E-08    | 7.69E-07    |
| ENSG00000140992 | 223.3245234 | -0.013743251 | 0.124755888 | -0.110161141 | 0.91228158  | 0.952987235 |
| ENSG00000140993 | 17.28592883 | 0.008470135  | 0.422844101 | 0.020031343  | 0.98401837  | 0.991961125 |
| ENSG00000140995 | 203.7282009 | 0.236389489  | 0.130637326 | 1.809509547  | 0.070371878 | 0.159695279 |
| ENSG00000141002 | 648.2777001 | 0.400722107  | 0.085264584 | 4.69974857   | 2.60E-06    | 2.12E-05    |
| ENSG00000141012 | 176.2691106 | -1.54244838  | 0.153590267 | -10.04261797 | 9.90E-24    | 4.07E-22    |
| ENSG00000141013 | 273.2195503 | -0.172681257 | 0.12487042  | -1.382883601 | 0.166700559 | 0.308528087 |
| ENSG00000141026 | 98.17606194 | 0.09454837   | 0.190276401 | 0.49690014   | 0.619259473 | 0.75281158  |
| ENSG00000141027 | 2400.626771 | -0.101303133 | 0.060862009 | -1.664472383 | 0.096018066 | 0.203249814 |
| ENSG00000141030 | 376.1565869 | 0.03958302   | 0.101098214 | 0.391530355  | 0.695405256 | 0.808571942 |
| ENSG00000141034 | 135.4074519 | 0.155006394  | 0.166520132 | 0.930856778  | 0.351927655 | 0.523567863 |
| ENSG00000141068 | 148.1879481 | -0.252771582 | 0.150135529 | -1.683622681 | 0.092254613 | 0.197035205 |
| ENSG00000141076 | 317.2317297 | 0.250193424  | 0.119066494 | 2.101291593  | 0.035615377 | 0.092749204 |
| ENSG00000141084 | 269.9622918 | -0.16382374  | 0.121092186 | -1.352884489 | 0.176092535 | 0.320951323 |
| ENSG00000141098 | 163.9245634 | 0.041572322  | 0.144351149 | 0.287994395  | 0.773351029 | 0.864290072 |
| ENSG00000141101 | 724.1858132 | 0.336153565  | 0.089063001 | 3.774334579  | 0.000160435 | 0.00087861  |
| ENSG00000141127 | 195.5254878 | 0.397807261  | 0.13052447  | 3.047760011  | 0.00230554  | 0.009221502 |
| ENSG00000141179 | 30.54523859 | -0.902618996 | 0.322179051 | -2.801606721 | 0.005084882 | 0.018156415 |
| ENSG00000141198 | 246.8179311 | 0.464380936  | 0.12310331  | 3.772286362  | 0.000161758 | 0.000885166 |
| ENSG00000141219 | 265.5475905 | 0.245997761  | 0.114204472 | 2.154011629  | 0.03123926  | 0.08322857  |
| ENSG00000141232 | 987.5828484 | -0.138484816 | 0.085719041 | -1.615566545 | 0.106188062 | 0.219808975 |
| ENSG00000141252 | 656.3856359 | -0.090689401 | 0.083075863 | -1.091645614 | 0.274988899 | 0.443384878 |
| ENSG00000141258 | 293.9693743 | 0.068088245  | 0.123688129 | 0.550483266  | 0.581987952 | 0.724300944 |
| ENSG00000141279 | 707.659398  | 0.186112038  | 0.087574436 | 2.125186831  | 0.033571026 | 0.088292868 |
| ENSG00000141293 | 23.72778639 | -4.680828757 | 0.706944106 | -6.621214774 | 3.56E-11    | 5.96E-10    |
| ENSG00000141295 | 81.27881689 | -0.044271025 | 0.208749962 | -0.212076806 | 0.832047114 | 0.901764202 |
| ENSG00000141298 | 420.3790054 | 0.0967394    | 0.096051885 | 1.007157746  | 0.313858975 | 0.485067336 |
| ENSG00000141314 | 27.91729832 | 0.782887851  | 0.331469413 | 2.361870567  | 0.018182989 | 0.053467961 |
| ENSG00000141337 | 86.25272771 | -0.144552163 | 0.201309909 | -0.718057861 | 0.472721611 | 0.633981332 |
| ENSG00000141338 | 9.562038739 | -5.531761444 | 1.263152165 | -4.379331008 | 1.19E-05    | 8.39E-05    |
| ENSG00000141349 | 253.7328647 | 0.081819109  | 0.117246511 | 0.697838331  | 0.485278304 | 0.645643525 |
| ENSG00000141367 | 4126.029341 | 0.094359844  | 0.058378797 | 1.616337584  | 0.106021345 | 0.219528572 |
| ENSG00000141376 | 806.4717416 | 0.259822579  | 0.07808935  | 3.327247283  | 0.000877085 | 0.003996242 |
| ENSG00000141378 | 325.2173939 | 0.211380893  | 0.115804344 | 1.825327832  | 0.067951573 | 0.155542916 |
| ENSG00000141380 | 1387.611015 | -0.261728356 | 0.085449297 | -3.062966763 | 0.002191544 | 0.008818281 |
| ENSG00000141384 | 94.7885279  | 0.794889354  | 0.191202576 | 4.157315084  | 3.22E-05    | 0.000207015 |
| ENSG00000141385 | 584.1379609 | -0.109353437 | 0.08734168  | -1.252018923 | 0.210562969 | 0.365654348 |
| ENSG00000141391 | 30.64425871 | -0.178927359 | 0.323289062 | -0.553459365 | 0.579948898 | 0.723108661 |
| ENSG00000141401 | 366.4120523 | -0.343150072 | 0.103900461 | -3.302680948 | 0.000957653 | 0.004324059 |
| ENSG00000141404 | 261.4027351 | -0.460635963 | 0.117926471 | -3.906128625 | 9.38E-05    | 0.00054349  |
| ENSG00000141424 | 536.546691  | 0.332477274  | 0.090700742 | 3.665651093  | 0.00024671  | 0.001290703 |
| ENSG00000141425 | 592.2956192 | 0.058837622  | 0.090569163 | 0.649642996  | 0.515922853 | 0.671096242 |
| ENSG00000141428 | 37.45138379 | -0.07803316  | 0.285293966 | -0.273518438 | 0.784454721 | 0.871011269 |

|                 |             |              |             |              |             |             |
|-----------------|-------------|--------------|-------------|--------------|-------------|-------------|
| ENSG00000141429 | 464.2313322 | 0.07099029   | 0.102362358 | 0.693519488  | 0.4879836   | 0.647922265 |
| ENSG00000141446 | 298.7596874 | -0.15910466  | 0.111926278 | -1.421513017 | 0.155167672 | 0.292709201 |
| ENSG00000141447 | 370.3120249 | 0.152018887  | 0.104149506 | 1.459621782  | 0.144394049 | 0.277272848 |
| ENSG00000141449 | 243.0255968 | -0.662980154 | 0.136749408 | -4.848139129 | 1.25E-06    | 1.08E-05    |
| ENSG00000141452 | 125.173381  | 0.327894357  | 0.159672958 | 2.053537192  | 0.040020507 | 0.101860492 |
| ENSG00000141456 | 1019.275312 | 0.290139555  | 0.080357956 | 3.610589037  | 0.000305502 | 0.001564489 |
| ENSG00000141458 | 491.1287179 | 0.131092887  | 0.089365502 | 1.46692946   | 0.142395245 | 0.274379425 |
| ENSG00000141480 | 837.435715  | 0.550815748  | 0.076001813 | 7.247402763  | 4.25E-13    | 8.79E-12    |
| ENSG00000141497 | 16.08333493 | 0.691294412  | 0.439766475 | 1.571957964  | 0.1159603   | 0.235114293 |
| ENSG00000141499 | 153.8643268 | -0.069600344 | 0.16547303  | -0.42061443  | 0.674036655 | 0.792450025 |
| ENSG00000141503 | 698.1733162 | -0.217361933 | 0.080572288 | -2.697725713 | 0.006981494 | 0.023739783 |
| ENSG00000141504 | 359.7011041 | -0.141458748 | 0.102226727 | -1.3837746   | 0.166427483 | 0.308255123 |
| ENSG00000141505 | 21.84607978 | -0.814900633 | 0.373788713 | -2.180110326 | 0.029249285 | 0.078830526 |
| ENSG00000141506 | 21.71631151 | 1.037010641  | 0.375122671 | 2.764457393  | 0.005701755 | 0.019968227 |
| ENSG00000141510 | 723.3538281 | -0.241269804 | 0.087167208 | -2.767896435 | 0.005641938 | 0.019798228 |
| ENSG00000141519 | 47.92251451 | -0.61266286  | 0.259233787 | -2.363360377 | 0.018110049 | 0.053298107 |
| ENSG00000141522 | 2113.931246 | 0.566240387  | 0.083105735 | 6.813493543  | 9.53E-12    | 1.69E-10    |
| ENSG00000141524 | 73.84829593 | -0.749258342 | 0.208890803 | -3.586842181 | 0.000334707 | 0.001693059 |
| ENSG00000141526 | 452.2149554 | 0.588823457  | 0.101721074 | 5.788608309  | 7.10E-09    | 8.91E-08    |
| ENSG00000141540 | 126.5725162 | 0.096589997  | 0.161717062 | 0.597277712  | 0.550321982 | 0.698254257 |
| ENSG00000141542 | 196.7880298 | 0.02441278   | 0.138133619 | 0.176733084  | 0.859718053 | 0.920041101 |
| ENSG00000141543 | 515.2564547 | 0.22193452   | 0.102132376 | 2.173008482  | 0.029779679 | 0.079968486 |
| ENSG00000141551 | 854.4764682 | 0.042903709  | 0.076965681 | 0.557439478  | 0.577227199 | 0.721059179 |
| ENSG00000141552 | 225.0506972 | 0.127837332  | 0.126240365 | 1.012650211  | 0.311227268 | 0.482646216 |
| ENSG00000141556 | 1173.059396 | -0.537219756 | 0.08725884  | -6.156622723 | 7.43E-10    | 1.05E-08    |
| ENSG00000141560 | 155.9768906 | -0.560036987 | 0.155928372 | -3.591629785 | 0.000328616 | 0.001665251 |
| ENSG00000141562 | 278.6721136 | -0.217135303 | 0.118022286 | -1.83978222  | 0.065800217 | 0.151598433 |
| ENSG00000141564 | 865.9558719 | -0.040933522 | 0.075354187 | -0.543214963 | 0.586981806 | 0.728901469 |
| ENSG00000141568 | 2060.909652 | -0.488408407 | 0.066442326 | -7.350862619 | 1.97E-13    | 4.20E-12    |
| ENSG00000141569 | 388.0809205 | 0.050873829  | 0.120639645 | 0.421700751  | 0.673243456 | 0.791795205 |
| ENSG00000141570 | 326.9854714 | 0.338558729  | 0.124065527 | 2.72887027   | 0.00635517  | 0.021890896 |
| ENSG00000141576 | 60.44373642 | -3.023499979 | 0.305417046 | -9.899578372 | 4.18E-23    | 1.64E-21    |
| ENSG00000141577 | 335.5423123 | 0.009290868  | 0.10926041  | 0.085034169  | 0.932234226 | 0.96324653  |
| ENSG00000141579 | 9.56952399  | 0.261558832  | 0.564179183 | 0.463609505  | 0.642927543 | 0.769595501 |
| ENSG00000141580 | 589.6126109 | -0.086337532 | 0.086791341 | -0.994771267 | 0.319847524 | 0.491564351 |
| ENSG00000141582 | 410.8849973 | 0.221637441  | 0.104059681 | 2.12990699   | 0.033179293 | 0.087475512 |
| ENSG00000141627 | 325.986677  | -0.23244785  | 0.116076562 | -2.002539065 | 0.045226786 | 0.112641961 |
| ENSG00000141642 | 21.28625686 | -0.233190114 | 0.371676635 | -0.627400519 | 0.530396727 | 0.68262236  |
| ENSG00000141644 | 381.0816145 | 0.050307666  | 0.098735226 | 0.509520948  | 0.610387119 | 0.746613363 |
| ENSG00000141646 | 344.6034205 | -0.106393922 | 0.104025718 | -1.022765564 | 0.306418703 | 0.47752037  |
| ENSG00000141655 | 8.850907137 | 0.570334596  | 0.590131034 | 0.966454164  | 0.333816972 | 0.505948102 |
| ENSG00000141664 | 392.0020827 | 0.171718854  | 0.099053636 | 1.733594654  | 0.08299003  | 0.181752564 |
| ENSG00000141668 | 9.174366599 | -2.745507839 | 0.767815044 | -3.575741139 | 0.000349237 | 0.00176022  |
| ENSG00000141696 | 599.2090248 | 0.103632806  | 0.085986561 | 1.205220962  | 0.228118012 | 0.3869082   |
| ENSG00000141698 | 293.138999  | 0.381635582  | 0.114198386 | 3.341864953  | 0.000832175 | 0.003812644 |
| ENSG00000141699 | 174.8408632 | -0.028476376 | 0.144979173 | -0.196417011 | 0.844283783 | 0.90976923  |
| ENSG00000141736 | 462.476883  | -0.089609052 | 0.097968692 | -0.914670293 | 0.360364744 | 0.531671417 |
| ENSG00000141738 | 21.97264638 | -0.356740647 | 0.368783429 | -0.967344569 | 0.33337181  | 0.505655309 |
| ENSG00000141741 | 155.6655836 | 0.096530836  | 0.148987358 | 0.647912934  | 0.517041264 | 0.671928822 |
| ENSG00000141750 | 63.07024693 | -1.008007843 | 0.238222749 | -4.231366841 | 2.32E-05    | 0.000153904 |

|                 |             |              |             |              |             |             |
|-----------------|-------------|--------------|-------------|--------------|-------------|-------------|
| ENSG00000141753 | 121.9228008 | -0.399419188 | 0.171357468 | -2.330912057 | 0.019757997 | 0.057189489 |
| ENSG00000141756 | 2323.566066 | 0.320420725  | 0.06444174  | 4.972254375  | 6.62E-07    | 6.11E-06    |
| ENSG00000141759 | 731.7006223 | 0.216436566  | 0.084232051 | 2.569527431  | 0.010183733 | 0.032784677 |
| ENSG00000141837 | 257.2694586 | 4.409561452  | 0.195959233 | 22.50244294  | 3.93E-112   | 1.20E-109   |
| ENSG00000141854 | 29.99646983 | 0.547651732  | 0.315071183 | 1.738184137  | 0.082178373 | 0.180368689 |
| ENSG00000141858 | 678.2723052 | 0.51558125   | 0.086871183 | 5.935008972  | 2.94E-09    | 3.84E-08    |
| ENSG00000141867 | 2921.477623 | 0.074427998  | 0.063773695 | 1.16706422   | 0.243184436 | 0.406039673 |
| ENSG00000141873 | 198.2296755 | -0.271419149 | 0.144306411 | -1.88085302  | 0.059991916 | 0.140850148 |
| ENSG00000141905 | 3172.966751 | 0.095336544  | 0.055982195 | 1.702979753  | 0.088571857 | 0.190911291 |
| ENSG00000141933 | 45.87793935 | 0.495766298  | 0.260560324 | 1.90269297   | 0.05708062  | 0.135235532 |
| ENSG00000141956 | 269.396896  | 0.28500252   | 0.118053716 | 2.414176618  | 0.015770816 | 0.047539195 |
| ENSG00000141959 | 374.2466122 | 0.062144363  | 0.111137015 | 0.559168899  | 0.576046456 | 0.720288817 |
| ENSG00000141965 | 553.5622034 | 0.212616292  | 0.097878196 | 2.172253876  | 0.029836519 | 0.080097953 |
| ENSG00000141971 | 190.9057025 | 0.147543793  | 0.138232394 | 1.067360475  | 0.285809089 | 0.455498103 |
| ENSG00000141985 | 856.2336532 | 0.223322949  | 0.079681119 | 2.802708503  | 0.005067545 | 0.018103714 |
| ENSG00000141994 | 191.6072901 | 0.20925105   | 0.14109457  | 1.483055301  | 0.138059719 | 0.268158859 |
| ENSG00000142002 | 510.6678687 | 0.347481866  | 0.090760333 | 3.828565333  | 0.000128892 | 0.000723642 |
| ENSG00000142039 | 261.4117662 | -0.123071793 | 0.131823789 | -0.933608372 | 0.350505945 | 0.522448749 |
| ENSG00000142046 | 18.30999691 | 0.106360895  | 0.426013114 | 0.249665778  | 0.802845826 | 0.882853868 |
| ENSG00000142065 | 56.6186731  | -0.348437768 | 0.236977432 | -1.47034156  | 0.14146927  | 0.273044633 |
| ENSG00000142082 | 108.9076417 | -0.240682539 | 0.170412579 | -1.412351952 | 0.157846356 | 0.29603041  |
| ENSG00000142089 | 1837.944558 | 0.762831333  | 0.067894233 | 11.23558355  | 2.73E-29    | 1.43E-27    |
| ENSG00000142102 | 412.7183205 | 0.80724367   | 0.105203871 | 7.673136535  | 1.68E-14    | 3.90E-13    |
| ENSG00000142156 | 1482.790918 | 0.495251699  | 0.088620529 | 5.588453404  | 2.29E-08    | 2.67E-07    |
| ENSG00000142166 | 249.5979642 | 0.016722203  | 0.120262591 | 0.139047418  | 0.889412679 | 0.939574317 |
| ENSG00000142168 | 961.7478244 | 0.217028418  | 0.075877104 | 2.860262273  | 0.004232908 | 0.015528769 |
| ENSG00000142173 | 268.1236466 | -0.498755707 | 0.141902523 | -3.51477689  | 0.000440124 | 0.002164627 |
| ENSG00000142178 | 8.722800256 | 0.671401432  | 0.589210097 | 1.139494104  | 0.254497126 | 0.41954244  |
| ENSG00000142186 | 829.7022231 | 0.383494282  | 0.080781028 | 4.747331056  | 2.06E-06    | 1.71E-05    |
| ENSG00000142188 | 112.5866346 | -0.095837818 | 0.1685591   | -0.568571013 | 0.569647301 | 0.714810407 |
| ENSG00000142192 | 4518.0418   | 0.28702864   | 0.060387961 | 4.753077185  | 2.00E-06    | 1.67E-05    |
| ENSG00000142197 | 105.8943063 | 0.233924883  | 0.181270847 | 1.29047162   | 0.196886959 | 0.348145911 |
| ENSG00000142207 | 649.7854371 | 0.212559641  | 0.084090146 | 2.527759221  | 0.011479305 | 0.036276669 |
| ENSG00000142208 | 952.0230642 | -0.133333394 | 0.080900893 | -1.648107801 | 0.099330552 | 0.208626833 |
| ENSG00000142227 | 591.7433954 | 0.216055641  | 0.1073158   | 2.013269635  | 0.044086271 | 0.110526477 |
| ENSG00000142230 | 848.4429283 | -0.054188901 | 0.082461162 | -0.657144517 | 0.511087997 | 0.667402909 |
| ENSG00000142235 | 70.04818309 | -0.075558946 | 0.207955648 | -0.363341641 | 0.716349691 | 0.823449162 |
| ENSG00000142252 | 79.21850062 | 0.353595808  | 0.198783169 | 1.778801544  | 0.075272304 | 0.16793997  |
| ENSG00000142279 | 157.8070708 | -0.068080851 | 0.149339001 | -0.455881257 | 0.648475369 | 0.773796594 |
| ENSG00000142303 | 21.0444628  | -0.661040042 | 0.426726698 | -1.549094645 | 0.12135897  | 0.244084244 |
| ENSG00000142327 | 209.4167963 | 0.057082203  | 0.141148851 | 0.404411389  | 0.685910227 | 0.801843308 |
| ENSG00000142330 | 108.9191897 | -0.169512477 | 0.185059449 | -0.915989312 | 0.359672501 | 0.530984721 |
| ENSG00000142396 | 101.8678008 | 0.268958608  | 0.174910592 | 1.537691942  | 0.124123955 | 0.248159578 |
| ENSG00000142408 | 692.1408058 | 0.31240277   | 0.097573753 | 3.20170906   | 0.001366149 | 0.005899261 |
| ENSG00000142409 | 210.6483741 | 0.24032812   | 0.133933856 | 1.794379167  | 0.07275267  | 0.163664987 |
| ENSG00000142444 | 68.49879237 | -0.003096735 | 0.21141531  | -0.014647637 | 0.988313294 | 0.994116494 |
| ENSG00000142453 | 1270.956415 | 0.397674474  | 0.072841031 | 5.459484424  | 4.78E-08    | 5.30E-07    |
| ENSG00000142459 | 84.25835557 | -0.466609622 | 0.192385197 | -2.425392535 | 0.015291842 | 0.046264163 |
| ENSG00000142494 | 143.5193139 | 0.275579533  | 0.151163416 | 1.823057062  | 0.068294749 | 0.156065778 |
| ENSG00000142507 | 491.6701327 | 0.626989088  | 0.090985905 | 6.89105735   | 5.54E-12    | 1.01E-10    |

|                 |             |              |             |              |             |             |
|-----------------|-------------|--------------|-------------|--------------|-------------|-------------|
| ENSG00000142528 | 136.5587067 | 0.172982172  | 0.15396319  | 1.12352941   | 0.261212717 | 0.427353254 |
| ENSG00000142530 | 11.65005691 | 0.282606917  | 0.509513778 | 0.554660009  | 0.579127235 | 0.722533108 |
| ENSG00000142534 | 12954.5295  | 0.112869528  | 0.079427652 | 1.42103569   | 0.155306384 | 0.292752117 |
| ENSG00000142538 | 97.96698833 | -1.678891241 | 0.197260802 | -8.5110231   | 1.72E-17    | 4.94E-16    |
| ENSG00000142541 | 4574.884096 | 0.16570662   | 0.05713782  | 2.900121506  | 0.00373018  | 0.013906009 |
| ENSG00000142544 | 30.06890993 | 0.767497395  | 0.323034947 | 2.375895867  | 0.017506403 | 0.05185838  |
| ENSG00000142546 | 214.0476459 | 0.082395515  | 0.128244976 | 0.642485325  | 0.520558114 | 0.674960491 |
| ENSG00000142552 | 97.05454523 | 0.480713957  | 0.185079278 | 2.597340789  | 0.009394866 | 0.030633632 |
| ENSG00000142556 | 55.30897999 | 0.170260925  | 0.239818626 | 0.709957052  | 0.477730769 | 0.638134946 |
| ENSG00000142599 | 1683.521684 | 0.096056584  | 0.067508742 | 1.42287623   | 0.154772038 | 0.292054868 |
| ENSG00000142611 | 20.46312361 | 0.963934464  | 0.392254113 | 2.457423473  | 0.013993762 | 0.042853799 |
| ENSG00000142627 | 392.4506948 | 0.148178912  | 0.100840907 | 1.469432554  | 0.141715503 | 0.273332098 |
| ENSG00000142634 | 366.3535498 | 0.516672599  | 0.112769754 | 4.581659339  | 4.61E-06    | 3.55E-05    |
| ENSG00000142655 | 222.1278669 | -0.027942596 | 0.13275785  | -0.210477921 | 0.833294682 | 0.902386945 |
| ENSG00000142657 | 1904.465501 | 0.000208481  | 0.061343719 | 0.003398579  | 0.997288332 | 0.998813347 |
| ENSG00000142669 | 369.9438187 | 0.139305671  | 0.107194002 | 1.299565906  | 0.193749791 | 0.344593988 |
| ENSG00000142675 | 10.16927022 | 0.179972481  | 0.555693611 | 0.323869985  | 0.746036469 | 0.845126958 |
| ENSG00000142676 | 7605.15253  | 0.273868278  | 0.057311469 | 4.77859461   | 1.77E-06    | 1.48E-05    |
| ENSG00000142684 | 144.1116004 | 0.29254119   | 0.171525833 | 1.705522632  | 0.088096995 | 0.190033552 |
| ENSG00000142686 | 65.09572116 | 0.150085211  | 0.232014157 | 0.646879541  | 0.517709908 | 0.672673303 |
| ENSG00000142687 | 302.7708784 | -0.129838848 | 0.109698092 | -1.18360169  | 0.236570771 | 0.39772109  |
| ENSG00000142694 | 102.2330269 | 0.123496522  | 0.210916036 | 0.585524572  | 0.558195049 | 0.705122829 |
| ENSG00000142731 | 214.7444478 | -0.093503265 | 0.132453541 | -0.705932538 | 0.480230092 | 0.640808597 |
| ENSG00000142733 | 138.1715588 | 0.536440652  | 0.158682171 | 3.380598129  | 0.000723282 | 0.003366451 |
| ENSG00000142751 | 145.3165575 | -0.17741849  | 0.150884368 | -1.175857332 | 0.239651892 | 0.401813096 |
| ENSG00000142765 | 121.5889338 | 0.256193579  | 0.163661014 | 1.565391612  | 0.117491114 | 0.23774095  |
| ENSG00000142784 | 215.5324351 | -0.309723971 | 0.126530514 | -2.447820387 | 0.014372328 | 0.043879177 |
| ENSG00000142794 | 88.21662319 | -0.058756843 | 0.193830834 | -0.303134653 | 0.761787247 | 0.856271541 |
| ENSG00000142798 | 1161.081625 | -0.544781298 | 0.077876035 | -6.995493505 | 2.64E-12    | 5.03E-11    |
| ENSG00000142856 | 209.5291692 | -0.068573417 | 0.128335283 | -0.534330197 | 0.593113104 | 0.73320952  |
| ENSG00000142864 | 3844.423753 | 0.112311875  | 0.055588513 | 2.020415155  | 0.043340343 | 0.109104264 |
| ENSG00000142867 | 78.13357554 | -0.209968691 | 0.204421198 | -1.027137564 | 0.304355693 | 0.475348501 |
| ENSG00000142871 | 519.9009492 | -0.832896587 | 0.096527942 | -8.628554292 | 6.21E-18    | 1.84E-16    |
| ENSG00000142875 | 81.36097978 | -0.272198072 | 0.202289394 | -1.345587462 | 0.178435597 | 0.32412839  |
| ENSG00000142892 | 149.6529445 | -0.08943358  | 0.147036181 | -0.608241995 | 0.543026986 | 0.692162425 |
| ENSG00000142937 | 5935.391203 | 0.113193445  | 0.071614002 | 1.580604937  | 0.113968396 | 0.232077311 |
| ENSG00000142945 | 484.8479437 | -0.217560406 | 0.099004095 | -2.197488973 | 0.027985543 | 0.076125663 |
| ENSG00000142949 | 553.8291021 | 0.087646298  | 0.096098209 | 0.912049237  | 0.361742799 | 0.532534336 |
| ENSG00000142961 | 65.16313288 | 0.135667516  | 0.226311522 | 0.59947242   | 0.548857897 | 0.697089229 |
| ENSG00000143013 | 911.4614072 | -2.082150615 | 0.084358215 | -24.68225066 | 1.66E-134   | 7.06E-132   |
| ENSG00000143028 | 267.9294212 | -0.241243165 | 0.117298543 | -2.056659514 | 0.039718989 | 0.101313354 |
| ENSG00000143033 | 305.0991106 | -0.324447441 | 0.108428135 | -2.992280921 | 0.002769013 | 0.010780579 |
| ENSG00000143061 | 35.71390706 | -1.36865449  | 0.307426182 | -4.451977649 | 8.51E-06    | 6.20E-05    |
| ENSG00000143067 | 83.34842412 | -0.129085477 | 0.195298188 | -0.660966076 | 0.508634069 | 0.66549765  |
| ENSG00000143079 | 158.4743915 | -0.110620194 | 0.144906602 | -0.763389604 | 0.445231078 | 0.610325858 |
| ENSG00000143093 | 259.0104956 | 0.167525839  | 0.120614254 | 1.388938982  | 0.164851305 | 0.305981275 |
| ENSG00000143106 | 302.6535586 | 0.252789107  | 0.11370888  | 2.223125472  | 0.02620734  | 0.072168405 |
| ENSG00000143126 | 417.4566726 | -0.478403358 | 0.108093125 | -4.425844446 | 9.61E-06    | 6.91E-05    |
| ENSG00000143147 | 48.24681221 | -0.92804746  | 0.260872945 | -3.557469177 | 0.000374445 | 0.00187469  |
| ENSG00000143149 | 214.1656207 | -0.132957169 | 0.12811455  | -1.037799139 | 0.299363578 | 0.469797808 |

|                 |             |              |             |              |             |             |
|-----------------|-------------|--------------|-------------|--------------|-------------|-------------|
| ENSG00000143153 | 301.2698091 | 1.185222388  | 0.116682512 | 10.15766948  | 3.06E-24    | 1.29E-22    |
| ENSG00000143155 | 440.0398    | -0.056639371 | 0.097872722 | -0.578704364 | 0.562788671 | 0.70902994  |
| ENSG00000143156 | 51.32387713 | 0.136188588  | 0.246261606 | 0.553024038  | 0.58024695  | 0.723159339 |
| ENSG00000143157 | 769.0104901 | 0.264014821  | 0.079840082 | 3.306795454  | 0.000943698 | 0.004266534 |
| ENSG00000143158 | 322.5218205 | 0.14190514   | 0.108647958 | 1.306100392  | 0.19151842  | 0.341750412 |
| ENSG00000143162 | 304.5678673 | 0.414810307  | 0.111661694 | 3.714884592  | 0.000203296 | 0.00108582  |
| ENSG00000143164 | 965.2079543 | -0.020761688 | 0.076736986 | -0.270556465 | 0.786732183 | 0.8723046   |
| ENSG00000143179 | 1388.885117 | -0.081471125 | 0.074538374 | -1.093009162 | 0.274389777 | 0.442672929 |
| ENSG00000143183 | 169.4614551 | -0.009026863 | 0.142922556 | -0.063159122 | 0.949639795 | 0.972060789 |
| ENSG00000143190 | 1077.13302  | -0.276553958 | 0.071210763 | -3.883597722 | 0.000102922 | 0.000591066 |
| ENSG00000143198 | 632.3546132 | 0.223616829  | 0.109706709 | 2.038314991  | 0.041518442 | 0.105291487 |
| ENSG00000143207 | 239.1315832 | -0.228447959 | 0.125862433 | -1.815060731 | 0.069514577 | 0.158184232 |
| ENSG00000143222 | 361.6862965 | 0.350127394  | 0.106133712 | 3.298927255  | 0.000970551 | 0.004369655 |
| ENSG00000143224 | 83.5039533  | 0.272727657  | 0.19718082  | 1.383134818  | 0.166623531 | 0.30849621  |
| ENSG00000143228 | 256.2258648 | 0.083497764  | 0.118140036 | 0.706769413  | 0.479709786 | 0.640321234 |
| ENSG00000143248 | 13.88041884 | -1.287029588 | 0.509810348 | -2.524526212 | 0.011585436 | 0.036546289 |
| ENSG00000143252 | 163.2726771 | -0.143912926 | 0.144085074 | -0.998805233 | 0.317889051 | 0.489733219 |
| ENSG00000143256 | 722.4940344 | 0.394329419  | 0.086880183 | 4.538772911  | 5.66E-06    | 4.29E-05    |
| ENSG00000143258 | 262.1580669 | 0.115345825  | 0.120698242 | 0.955654553  | 0.33924679  | 0.511070291 |
| ENSG00000143294 | 1004.199888 | 0.308997706  | 0.074401    | 4.153139124  | 3.28E-05    | 0.000210445 |
| ENSG00000143303 | 147.1138388 | -0.564067141 | 0.15471193  | -3.645918834 | 0.000266438 | 0.001382074 |
| ENSG00000143314 | 448.7024479 | 0.467766227  | 0.101592439 | 4.604340936  | 4.14E-06    | 3.22E-05    |
| ENSG00000143315 | 75.20434854 | 0.128711053  | 0.206212075 | 0.624168363  | 0.532517022 | 0.684003896 |
| ENSG00000143319 | 595.0583476 | -0.013227722 | 0.084556738 | -0.156436047 | 0.875689326 | 0.931173956 |
| ENSG00000143320 | 723.7078863 | -1.956400836 | 0.089137689 | -21.94807668 | 9.03E-107   | 2.59E-104   |
| ENSG00000143321 | 2777.946845 | 0.202745939  | 0.057264588 | 3.540511638  | 0.000399352 | 0.001982225 |
| ENSG00000143322 | 943.2699228 | -0.247709211 | 0.073733634 | -3.359514466 | 0.000780796 | 0.003601917 |
| ENSG00000143324 | 538.1406708 | -0.561268228 | 0.099041353 | -5.667008869 | 1.45E-08    | 1.75E-07    |
| ENSG00000143333 | 170.5987753 | -0.389746782 | 0.146442201 | -2.66143762  | 0.007780776 | 0.026128749 |
| ENSG00000143337 | 692.7654139 | 0.236611057  | 0.093909371 | 2.51956812   | 0.01174989  | 0.036990298 |
| ENSG00000143340 | 10.00292387 | -4.07119107  | 0.937550071 | -4.342371888 | 1.41E-05    | 9.79E-05    |
| ENSG00000143344 | 104.1600456 | -0.054296052 | 0.173519804 | -0.312909825 | 0.754349173 | 0.851522246 |
| ENSG00000143363 | 206.3535807 | -0.108466228 | 0.134527866 | -0.806273315 | 0.420085273 | 0.587797573 |
| ENSG00000143367 | 125.6855564 | -0.247480303 | 0.15823044  | -1.564049897 | 0.117805851 | 0.238269304 |
| ENSG00000143368 | 1001.674741 | 0.224842806  | 0.088640917 | 2.536557748  | 0.011194828 | 0.035486962 |
| ENSG00000143369 | 76.45854567 | -0.438840923 | 0.212621956 | -2.063949234 | 0.03902253  | 0.099845078 |
| ENSG00000143373 | 366.8083226 | -0.271209305 | 0.114411182 | -2.370478999 | 0.017765053 | 0.052436584 |
| ENSG00000143374 | 557.2270548 | -0.042405096 | 0.086226596 | -0.491786738 | 0.622870113 | 0.755174907 |
| ENSG00000143375 | 85.97035567 | -1.765436898 | 0.211205477 | -8.358859448 | 6.33E-17    | 1.75E-15    |
| ENSG00000143376 | 894.4113147 | -0.028998412 | 0.076628213 | -0.378429972 | 0.705111206 | 0.815025133 |
| ENSG00000143379 | 581.9120716 | -0.0513769   | 0.084845142 | -0.605537319 | 0.544822036 | 0.693593904 |
| ENSG00000143382 | 374.0487224 | -0.73716785  | 0.131861919 | -5.590452934 | 2.26E-08    | 2.65E-07    |
| ENSG00000143384 | 1920.430632 | 0.320094851  | 0.06453407  | 4.96009083   | 7.05E-07    | 6.46E-06    |
| ENSG00000143387 | 71.19126444 | -0.626216543 | 0.218492218 | -2.866081672 | 0.00415587  | 0.015311554 |
| ENSG00000143390 | 717.0151325 | 0.044781361  | 0.084263586 | 0.531443812  | 0.595111268 | 0.734903558 |
| ENSG00000143393 | 833.8470547 | 0.043898065  | 0.082130964 | 0.534488616  | 0.593003523 | 0.733138575 |
| ENSG00000143398 | 1830.624828 | -0.075724681 | 0.065593234 | -1.154458732 | 0.248312148 | 0.412635231 |
| ENSG00000143401 | 1532.491853 | -0.002286755 | 0.064930498 | -0.035218507 | 0.971905505 | 0.985302874 |
| ENSG00000143409 | 167.1741505 | -0.059638652 | 0.140350395 | -0.424926854 | 0.670889998 | 0.79003143  |
| ENSG00000143418 | 1144.767021 | 0.242129733  | 0.077314604 | 3.131746413  | 0.001737699 | 0.007253925 |

|                 |             |              |             |              |             |             |
|-----------------|-------------|--------------|-------------|--------------|-------------|-------------|
| ENSG00000143420 | 838.445903  | -0.096722844 | 0.080001563 | -1.209011927 | 0.226658263 | 0.385036718 |
| ENSG00000143434 | 46.2982216  | -1.11843963  | 0.27149516  | -4.119556425 | 3.80E-05    | 0.000239887 |
| ENSG00000143436 | 221.3602817 | 0.19361064   | 0.140039134 | 1.38254668   | 0.166803908 | 0.308626778 |
| ENSG00000143437 | 739.6144775 | 0.080143404  | 0.084473964 | 0.948734969  | 0.342755424 | 0.514590639 |
| ENSG00000143442 | 1992.963211 | -0.228037444 | 0.076650432 | -2.975031415 | 0.002929585 | 0.011302637 |
| ENSG00000143443 | 124.6830502 | 0.514277547  | 0.166668594 | 3.085629594  | 0.002031217 | 0.008277489 |
| ENSG00000143457 | 166.7081132 | -0.002806724 | 0.139644194 | -0.020099109 | 0.983964311 | 0.991961125 |
| ENSG00000143458 | 207.0388691 | 0.43372372   | 0.134319193 | 3.229052451  | 0.001242011 | 0.005424916 |
| ENSG00000143476 | 628.7214018 | -0.417794208 | 0.088994524 | -4.694605809 | 2.67E-06    | 2.17E-05    |
| ENSG00000143479 | 297.9015948 | 0.459785502  | 0.11789908  | 3.899822647  | 9.63E-05    | 0.000556007 |
| ENSG00000143486 | 360.5865532 | 0.304145735  | 0.105681339 | 2.877951183  | 0.004002671 | 0.014812872 |
| ENSG00000143493 | 268.4506294 | -0.328983543 | 0.137302283 | -2.396052975 | 0.016572695 | 0.049520665 |
| ENSG00000143494 | 190.37286   | 0.463109031  | 0.138721239 | 3.338414759  | 0.000842579 | 0.003852768 |
| ENSG00000143498 | 71.77153361 | -0.057726762 | 0.211093598 | -0.273465243 | 0.784495607 | 0.871011269 |
| ENSG00000143499 | 59.99171789 | 0.226760087  | 0.226416147 | 1.001519062  | 0.316575929 | 0.488192126 |
| ENSG00000143514 | 1153.325341 | -0.146966591 | 0.07444042  | -1.974284826 | 0.048349365 | 0.118901179 |
| ENSG00000143515 | 935.6364048 | 0.322229312  | 0.078639558 | 4.097547353  | 4.18E-05    | 0.000261495 |
| ENSG00000143537 | 1120.063538 | 0.694803511  | 0.086692031 | 8.014617966  | 1.10E-15    | 2.83E-14    |
| ENSG00000143543 | 45.35468048 | 0.793409234  | 0.287085321 | 2.763670504  | 0.005715522 | 0.020011451 |
| ENSG00000143545 | 496.0440008 | 0.34953198   | 0.095012205 | 3.678811386  | 0.000234323 | 0.001230483 |
| ENSG00000143549 | 2199.131896 | 0.08692335   | 0.06748009  | 1.28813329   | 0.197699569 | 0.34921957  |
| ENSG00000143553 | 115.6284033 | 0.074740383  | 0.174927884 | 0.427263973  | 0.66918707  | 0.788596542 |
| ENSG00000143554 | 45.43524735 | -0.198034916 | 0.278225609 | -0.711778174 | 0.47660215  | 0.63753861  |
| ENSG00000143569 | 5869.841035 | 0.094222495  | 0.052707494 | 1.787648925  | 0.073832667 | 0.165384703 |
| ENSG00000143570 | 16.6870271  | 0.481885805  | 0.429393949 | 1.122246381  | 0.261757697 | 0.428099137 |
| ENSG00000143575 | 1072.656402 | 0.045474506  | 0.074991613 | 0.606394561  | 0.544252779 | 0.692994814 |
| ENSG00000143578 | 53.53290088 | -0.091129948 | 0.247088619 | -0.368814835 | 0.712265746 | 0.820165336 |
| ENSG00000143590 | 52.46409629 | 0.757531276  | 0.240370562 | 3.151514356  | 0.001624262 | 0.006845486 |
| ENSG00000143603 | 16.39204254 | -3.033980805 | 0.574171921 | -5.284098188 | 1.26E-07    | 1.31E-06    |
| ENSG00000143612 | 843.0461763 | 0.169025882  | 0.078485548 | 2.153592422  | 0.031272149 | 0.083272862 |
| ENSG00000143614 | 1190.225064 | 0.044930349  | 0.070753273 | 0.635028556  | 0.525409791 | 0.678660352 |
| ENSG00000143621 | 1383.086838 | -0.027590348 | 0.087909417 | -0.313849742 | 0.753635163 | 0.851126639 |
| ENSG00000143622 | 163.0335858 | -0.172133725 | 0.142774146 | -1.205636521 | 0.227957671 | 0.386682938 |
| ENSG00000143624 | 761.3691332 | 0.19146125   | 0.08147685  | 2.349885268  | 0.018779199 | 0.054830888 |
| ENSG00000143630 | 98.34780817 | 0.056305149  | 0.180546209 | 0.311860045  | 0.755146888 | 0.852042366 |
| ENSG00000143632 | 8.725428223 | 0.090407165  | 0.576284935 | 0.156879278  | 0.875339991 | 0.931034312 |
| ENSG00000143633 | 184.9282836 | -0.122489685 | 0.136652356 | -0.896359848 | 0.370060604 | 0.541314309 |
| ENSG00000143641 | 1105.776926 | 0.071827311  | 0.073702932 | 0.974551615  | 0.329782724 | 0.502217902 |
| ENSG00000143643 | 306.73239   | -0.082550991 | 0.125003286 | -0.660390569 | 0.509003223 | 0.665670633 |
| ENSG00000143653 | 661.6385767 | 0.180906618  | 0.085815335 | 2.108091956  | 0.035023036 | 0.091528528 |
| ENSG00000143669 | 98.85375096 | -0.144884244 | 0.181710358 | -0.797336185 | 0.42525581  | 0.592557124 |
| ENSG00000143702 | 689.5305905 | 0.245849226  | 0.081241648 | 3.026147696  | 0.002476913 | 0.009817493 |
| ENSG00000143727 | 356.1616718 | 0.308622933  | 0.109873778 | 2.808886151  | 0.004971322 | 0.017818482 |
| ENSG00000143740 | 184.6657546 | -0.148664043 | 0.13501729  | -1.101074115 | 0.270864402 | 0.438500861 |
| ENSG00000143742 | 272.5780772 | -0.122156046 | 0.115497283 | -1.057652987 | 0.290213676 | 0.460480233 |
| ENSG00000143748 | 241.0471218 | -0.071044526 | 0.128617135 | -0.552372168 | 0.580693395 | 0.723518357 |
| ENSG00000143751 | 463.0984527 | 0.141658759  | 0.095310067 | 1.486293767  | 0.137201435 | 0.266871768 |
| ENSG00000143753 | 442.8169125 | 0.168759527  | 0.098328493 | 1.716283061  | 0.086110247 | 0.18692484  |
| ENSG00000143756 | 396.2876877 | -0.289440642 | 0.11370754  | -2.545483278 | 0.010912659 | 0.03474178  |
| ENSG00000143761 | 2079.613798 | 0.100196454  | 0.061757146 | 1.622426887  | 0.104711976 | 0.217394196 |



|                 |             |              |             |              |             |             |
|-----------------|-------------|--------------|-------------|--------------|-------------|-------------|
| ENSG00000143771 | 378.1422807 | 0.296137068  | 0.117094433 | 2.529044804  | 0.011437343 | 0.036168472 |
| ENSG00000143772 | 441.9637855 | 0.469891845  | 0.100716344 | 4.665497438  | 3.08E-06    | 2.46E-05    |
| ENSG00000143774 | 862.3553827 | 0.8069227    | 0.080132473 | 10.06985897  | 7.51E-24    | 3.11E-22    |
| ENSG00000143776 | 1484.535686 | 0.017794836  | 0.071536481 | 0.248751913  | 0.80355269  | 0.883419725 |
| ENSG00000143793 | 511.4006236 | 0.455911642  | 0.093061034 | 4.899060579  | 9.63E-07    | 8.56E-06    |
| ENSG00000143797 | 168.9942933 | -0.206189012 | 0.140159339 | -1.471104344 | 0.141262901 | 0.272683793 |
| ENSG00000143799 | 4069.216157 | -0.016304379 | 0.053580669 | -0.304295928 | 0.760902447 | 0.855550842 |
| ENSG00000143801 | 37.50547819 | -0.054069334 | 0.282833574 | -0.191170139 | 0.848392297 | 0.912928344 |
| ENSG00000143811 | 245.8960641 | 0.152226588  | 0.12510106  | 1.216828922  | 0.223669313 | 0.382038284 |
| ENSG00000143815 | 632.8988276 | -0.080562555 | 0.086497472 | -0.931386247 | 0.351653802 | 0.523326725 |
| ENSG00000143819 | 384.2659758 | -0.17288774  | 0.106289449 | -1.626574801 | 0.103827435 | 0.215867235 |
| ENSG00000143842 | 87.77308987 | -0.549514952 | 0.202155395 | -2.718279926 | 0.006562229 | 0.022515788 |
| ENSG00000143845 | 13.38953893 | -1.906363229 | 0.537142903 | -3.54908018  | 0.000386579 | 0.001926998 |
| ENSG00000143847 | 146.2455075 | 0.932589082  | 0.154443244 | 6.038393508  | 1.56E-09    | 2.12E-08    |
| ENSG00000143850 | 7.977421879 | -2.457475283 | 0.735669611 | -3.340460507 | 0.000836396 | 0.003830731 |
| ENSG00000143862 | 290.0376918 | 0.453261929  | 0.115326835 | 3.930238167  | 8.49E-05    | 0.000498142 |
| ENSG00000143870 | 3461.52226  | 0.747870258  | 0.064764096 | 11.54760585  | 7.59E-31    | 4.28E-29    |
| ENSG00000143878 | 396.4853769 | 0.641680212  | 0.10468008  | 6.129917096  | 8.79E-10    | 1.23E-08    |
| ENSG00000143889 | 257.5197354 | -0.252727933 | 0.119711998 | -2.111132873 | 0.034760893 | 0.09092854  |
| ENSG00000143891 | 89.36923907 | -0.305885768 | 0.189658226 | -1.612826263 | 0.106782259 | 0.220811186 |
| ENSG00000143919 | 103.6511183 | -0.190490336 | 0.181318502 | -1.050584106 | 0.293449644 | 0.463987641 |
| ENSG00000143924 | 1269.233946 | -0.144375703 | 0.076859025 | -1.878448283 | 0.060319866 | 0.141454617 |
| ENSG00000143933 | 1218.352499 | 0.022298327  | 0.075158141 | 0.296685445  | 0.76670667  | 0.85946282  |
| ENSG00000143942 | 67.28887296 | 0.352566643  | 0.222901318 | 1.581716278  | 0.113714355 | 0.231768071 |
| ENSG00000143947 | 2662.428748 | 0.233045875  | 0.068152253 | 3.419488915  | 0.000627389 | 0.00296532  |
| ENSG00000143951 | 91.95002561 | 0.204763961  | 0.187895941 | 1.089773197  | 0.275813063 | 0.444254799 |
| ENSG00000143952 | 180.4265478 | -0.105978888 | 0.138536058 | -0.764991368 | 0.444276685 | 0.609210718 |
| ENSG00000143970 | 1910.438886 | -0.034956407 | 0.063110037 | -0.553896163 | 0.579649911 | 0.722800027 |
| ENSG00000143971 | 147.5582671 | -0.634308477 | 0.152459034 | -4.160517493 | 3.18E-05    | 0.000204414 |
| ENSG00000143977 | 484.2452633 | 0.490459166  | 0.114510382 | 4.283097826  | 1.84E-05    | 0.00012459  |
| ENSG00000143995 | 1086.625283 | 0.229661685  | 0.073110054 | 3.141314659  | 0.001681912 | 0.007052856 |
| ENSG00000144021 | 735.1539778 | 0.255468042  | 0.084622488 | 3.018914333  | 0.002536823 | 0.010006949 |
| ENSG00000144026 | 46.14097474 | 0.070350825  | 0.264611731 | 0.265864348  | 0.790343683 | 0.874789829 |
| ENSG00000144028 | 4059.977303 | 0.074692728  | 0.058967518 | 1.266675794  | 0.205271239 | 0.358682061 |
| ENSG00000144029 | 134.9514553 | 0.511106404  | 0.164245459 | 3.111844956  | 0.001859221 | 0.007690365 |
| ENSG00000144034 | 98.5977544  | -0.430606702 | 0.183906755 | -2.341440386 | 0.019209493 | 0.055878185 |
| ENSG00000144036 | 164.7314414 | -0.206642155 | 0.142450011 | -1.450629261 | 0.146883123 | 0.280754828 |
| ENSG00000144040 | 190.0456365 | -0.055257054 | 0.138896014 | -0.39783038  | 0.690755222 | 0.80536509  |
| ENSG00000144043 | 220.3597614 | 0.300437734  | 0.129220074 | 2.325008229  | 0.02007152  | 0.057941768 |
| ENSG00000144048 | 85.15147821 | -0.514008619 | 0.193260294 | -2.659670071 | 0.007821723 | 0.026228633 |
| ENSG00000144061 | 14.1453273  | -1.206954267 | 0.487163634 | -2.477513062 | 0.013230157 | 0.040934804 |
| ENSG00000144115 | 58.52302985 | -0.877645779 | 0.237635301 | -3.693246641 | 0.000221409 | 0.001171425 |
| ENSG00000144118 | 111.8250759 | -0.389656679 | 0.172177119 | -2.263115336 | 0.02362858  | 0.066130837 |
| ENSG00000144120 | 113.2904079 | 0.307005845  | 0.174689539 | 1.757436913  | 0.078843366 | 0.174521394 |
| ENSG00000144134 | 36.74406404 | 0.036656068  | 0.285866524 | 0.128227915  | 0.89796861  | 0.944497571 |
| ENSG00000144136 | 432.0821943 | -0.009062441 | 0.095862525 | -0.094535804 | 0.924683543 | 0.958810774 |
| ENSG00000144152 | 88.36765026 | 0.158243806  | 0.185891158 | 0.851271291  | 0.394618669 | 0.562705151 |
| ENSG00000144161 | 151.5341659 | -0.29125199  | 0.154034187 | -1.890826937 | 0.05864745  | 0.138109092 |
| ENSG00000144182 | 34.61312129 | 0.383045545  | 0.319426009 | 1.199168303  | 0.230462509 | 0.389708303 |
| ENSG00000144199 | 44.78384096 | 0.163114782  | 0.257808001 | 0.632698679  | 0.526930433 | 0.680061722 |

|                 |             |              |             |              |             |             |
|-----------------|-------------|--------------|-------------|--------------|-------------|-------------|
| ENSG00000144214 | 11.4923326  | -0.716014782 | 0.516773613 | -1.385548263 | 0.165884885 | 0.307537077 |
| ENSG00000144224 | 602.2430022 | 0.271275989  | 0.084407353 | 3.213890481  | 0.001309496 | 0.005677312 |
| ENSG00000144228 | 178.6187041 | -0.075810334 | 0.138278915 | -0.548242179 | 0.583525624 | 0.725571784 |
| ENSG00000144231 | 583.0494397 | -0.058776665 | 0.086202932 | -0.681840677 | 0.4953397   | 0.654135261 |
| ENSG00000144233 | 318.9584951 | 0.031561208  | 0.107290359 | 0.294166305  | 0.768630827 | 0.860932719 |
| ENSG00000144278 | 22.59126256 | -3.546285616 | 0.545110767 | -6.50562387  | 7.74E-11    | 1.24E-09    |
| ENSG00000144283 | 888.3160825 | -0.16132284  | 0.078186098 | -2.063318727 | 0.039082356 | 0.099961736 |
| ENSG00000144306 | 63.22552727 | 0.294592667  | 0.232023387 | 1.269667989  | 0.20420292  | 0.357437809 |
| ENSG00000144320 | 197.1255034 | 0.390494797  | 0.130122316 | 3.000982524  | 0.0026911   | 0.010515127 |
| ENSG00000144354 | 371.4875499 | -0.312332096 | 0.10737502  | -2.908796637 | 0.003628228 | 0.013609003 |
| ENSG00000144355 | 1348.121228 | -0.797773366 | 0.070768633 | -11.27297973 | 1.78E-29    | 9.53E-28    |
| ENSG00000144357 | 496.837091  | 0.097800119  | 0.094568779 | 1.034169205  | 0.301057068 | 0.471454697 |
| ENSG00000144366 | 136.9914592 | -0.713594953 | 0.17031872  | -4.189762315 | 2.79E-05    | 0.000181769 |
| ENSG00000144369 | 1319.399836 | -0.587029438 | 0.06697354  | -8.765094955 | 1.87E-18    | 5.82E-17    |
| ENSG00000144381 | 4073.18556  | -0.107508719 | 0.062018832 | -1.733485052 | 0.083009492 | 0.181766849 |
| ENSG00000144395 | 84.53400489 | -0.27430656  | 0.193783643 | -1.415529999 | 0.156913159 | 0.294791915 |
| ENSG00000144401 | 93.83966774 | -0.300613981 | 0.188223745 | -1.597109761 | 0.110241243 | 0.226395741 |
| ENSG00000144426 | 208.949203  | 0.04775911   | 0.132104404 | 0.361525497  | 0.717706648 | 0.824088015 |
| ENSG00000144451 | 61.38832702 | -0.671762147 | 0.23171044  | -2.899144932 | 0.003741819 | 0.013945696 |
| ENSG00000144455 | 55.60912884 | 0.159086513  | 0.244791946 | 0.649884588  | 0.515766774 | 0.671096242 |
| ENSG00000144468 | 164.104135  | -0.165529266 | 0.15262123  | -1.084575621 | 0.278109657 | 0.446980132 |
| ENSG00000144485 | 226.3279458 | 0.565100812  | 0.140848233 | 4.012125678  | 6.02E-05    | 0.000363089 |
| ENSG00000144488 | 236.8447301 | 0.689797188  | 0.127431029 | 5.413102218  | 6.19E-08    | 6.76E-07    |
| ENSG00000144504 | 264.4458601 | -0.322829309 | 0.130239956 | -2.478727094 | 0.013185215 | 0.040831726 |
| ENSG00000144524 | 256.219533  | 0.042800582  | 0.119758435 | 0.357390958  | 0.720799145 | 0.826670933 |
| ENSG00000144535 | 278.3605943 | -0.117881797 | 0.117949372 | -0.99942708  | 0.317587847 | 0.489376534 |
| ENSG00000144554 | 392.0641434 | -0.320520619 | 0.099176928 | -3.231806285 | 0.001230104 | 0.005377925 |
| ENSG00000144559 | 208.2860721 | -0.015645324 | 0.142369656 | -0.109892265 | 0.912494817 | 0.953030514 |
| ENSG00000144560 | 411.2612787 | -0.070648097 | 0.103231981 | -0.68436251  | 0.493746283 | 0.65301328  |
| ENSG00000144566 | 559.1832665 | 0.109542361  | 0.093401599 | 1.172810338  | 0.240871871 | 0.40337701  |
| ENSG00000144567 | 222.6936981 | 0.503336818  | 0.128799557 | 3.907908005  | 9.31E-05    | 0.000539727 |
| ENSG00000144579 | 480.0459606 | 0.152056549  | 0.098478621 | 1.544056445  | 0.122574659 | 0.246029645 |
| ENSG00000144580 | 480.4217648 | -0.015246853 | 0.103849782 | -0.146816419 | 0.883276925 | 0.935630116 |
| ENSG00000144583 | 51.52105846 | -3.009214827 | 0.326198382 | -9.225106555 | 2.83E-20    | 9.71E-19    |
| ENSG00000144589 | 146.1906065 | 0.016180639  | 0.147900353 | 0.109402298  | 0.912883411 | 0.953048924 |
| ENSG00000144591 | 181.7871381 | -0.047230776 | 0.141840591 | -0.332984909 | 0.739145675 | 0.840370643 |
| ENSG00000144596 | 22.57839577 | -2.034739238 | 0.426082923 | -4.775453618 | 1.79E-06    | 1.50E-05    |
| ENSG00000144597 | 275.6700691 | 0.165917648  | 0.12297224  | 1.349228473  | 0.177263592 | 0.322541668 |
| ENSG00000144635 | 404.8363719 | 0.402263419  | 0.102405473 | 3.928143759  | 8.56E-05    | 0.000501033 |
| ENSG00000144642 | 259.9854706 | -1.49983066  | 0.127637806 | -11.75067718 | 7.01E-32    | 4.07E-30    |
| ENSG00000144645 | 76.65816146 | -4.086715251 | 0.339173193 | -12.04905145 | 1.96E-33    | 1.20E-31    |
| ENSG00000144647 | 295.3973388 | 0.613764526  | 0.114263489 | 5.371484179  | 7.81E-08    | 8.34E-07    |
| ENSG00000144649 | 12.53392964 | -2.045336248 | 0.553177089 | -3.697434853 | 0.000217789 | 0.00115536  |
| ENSG00000144655 | 245.2337638 | 0.432899105  | 0.127844735 | 3.386131664  | 0.000708854 | 0.003308062 |
| ENSG00000144659 | 217.9661068 | 0.099766531  | 0.135518592 | 0.736183347  | 0.461619126 | 0.624677335 |
| ENSG00000144674 | 4082.22679  | 0.260121295  | 0.062830263 | 4.140063788  | 3.47E-05    | 0.000221391 |
| ENSG00000144677 | 503.7132521 | 0.377155783  | 0.092837533 | 4.062535607  | 4.85E-05    | 0.00029999  |
| ENSG00000144711 | 956.8057661 | 0.031056411  | 0.079840777 | 0.388979312  | 0.69729145  | 0.810027539 |
| ENSG00000144712 | 278.2368349 | 0.289679183  | 0.11869985  | 2.440434268  | 0.014669615 | 0.04465094  |
| ENSG00000144713 | 7114.406163 | 0.339477672  | 0.075188669 | 4.515011083  | 6.33E-06    | 4.74E-05    |

|                 |             |              |             |              |             |             |
|-----------------|-------------|--------------|-------------|--------------|-------------|-------------|
| ENSG00000144724 | 432.5946659 | 0.006745031  | 0.098403608 | 0.068544555  | 0.945352154 | 0.969665557 |
| ENSG00000144730 | 89.17453568 | -0.887261066 | 0.195331587 | -4.542332745 | 5.56E-06    | 4.23E-05    |
| ENSG00000144736 | 124.260854  | 0.015527681  | 0.16470945  | 0.094273166  | 0.924892165 | 0.958816254 |
| ENSG00000144741 | 176.3451276 | -0.128770245 | 0.139169909 | -0.925273619 | 0.354823598 | 0.526259854 |
| ENSG00000144744 | 220.2393584 | -0.112347168 | 0.126288904 | -0.889604421 | 0.373678331 | 0.543774943 |
| ENSG00000144746 | 332.2219512 | 0.143764241  | 0.109571944 | 1.31205339   | 0.189502121 | 0.338829423 |
| ENSG00000144747 | 332.82721   | 0.110060011  | 0.107402092 | 1.024747366  | 0.305482407 | 0.476472504 |
| ENSG00000144749 | 12.82586794 | -3.273867483 | 0.681670021 | -4.802715949 | 1.57E-06    | 1.33E-05    |
| ENSG00000144791 | 1046.910978 | 0.282792454  | 0.072590786 | 3.8957073    | 9.79E-05    | 0.000563911 |
| ENSG00000144802 | 125.6856749 | -3.687018916 | 0.245377089 | -15.02592981 | 4.97E-51    | 5.45E-49    |
| ENSG00000144815 | 218.0181474 | 0.095764984  | 0.13002028  | 0.736538823  | 0.46140285  | 0.624585702 |
| ENSG00000144821 | 87.29052298 | -1.236373703 | 0.201383075 | -6.139412165 | 8.28E-10    | 1.17E-08    |
| ENSG00000144827 | 80.734076   | -0.137209946 | 0.206599147 | -0.664136072 | 0.506603225 | 0.663984568 |
| ENSG00000144840 | 57.58058337 | 0.0084658    | 0.233594701 | 0.036241402  | 0.971089873 | 0.984973605 |
| ENSG00000144848 | 310.5514915 | 0.240098177  | 0.108297666 | 2.217020802  | 0.02662167  | 0.073109404 |
| ENSG00000144857 | 291.2935791 | -4.155042163 | 0.185739809 | -22.37022949 | 7.67E-111   | 2.29E-108   |
| ENSG00000144867 | 351.4775117 | 0.195037001  | 0.104787778 | 1.861257149  | 0.062707871 | 0.145813188 |
| ENSG00000144893 | 84.26011427 | -1.374672001 | 0.210886157 | -6.518550211 | 7.10E-11    | 1.15E-09    |
| ENSG00000144895 | 529.2255267 | 0.17778673   | 0.093859923 | 1.894170855  | 0.058202335 | 0.137314109 |
| ENSG00000144909 | 212.4772021 | -0.147564237 | 0.128907813 | -1.144726865 | 0.252322319 | 0.416935845 |
| ENSG00000144935 | 86.50432829 | -0.682623878 | 0.19569119  | -3.488270867 | 0.000486155 | 0.002362167 |
| ENSG00000144959 | 43.11127811 | -0.770778546 | 0.270080463 | -2.853884863 | 0.004318818 | 0.015806784 |
| ENSG00000145012 | 667.6356574 | -0.308563962 | 0.091602052 | -3.368526748 | 0.000755711 | 0.003495379 |
| ENSG00000145014 | 91.277717   | 0.412676027  | 0.190441267 | 2.166946451  | 0.030238937 | 0.081046815 |
| ENSG00000145016 | 499.9066049 | 0.061501499  | 0.090148747 | 0.682222458  | 0.495098296 | 0.654123943 |
| ENSG00000145022 | 57.06984097 | 0.177746793  | 0.233409761 | 0.761522537  | 0.446345023 | 0.611307684 |
| ENSG00000145041 | 892.8313614 | 0.242112845  | 0.077412279 | 3.127576762  | 0.001762538 | 0.007340163 |
| ENSG00000145050 | 1648.047528 | 0.719985695  | 0.065730206 | 10.95365041  | 6.38E-28    | 3.20E-26    |
| ENSG00000145088 | 14.69114058 | 0.014146831  | 0.469565028 | 0.030127523  | 0.97596535  | 0.987850214 |
| ENSG00000145147 | 158.8137797 | -5.515043392 | 0.354897904 | -15.53980268 | 1.87E-54    | 2.20E-52    |
| ENSG00000145191 | 207.5858467 | -0.183651697 | 0.132256446 | -1.388603    | 0.164953505 | 0.306090076 |
| ENSG00000145214 | 78.63077997 | 0.234685564  | 0.204988195 | 1.144873554  | 0.25226154  | 0.416884454 |
| ENSG00000145216 | 340.911721  | -0.06608992  | 0.105597106 | -0.625868666 | 0.531401089 | 0.683156819 |
| ENSG00000145220 | 634.8166616 | 0.059334835  | 0.084246301 | 0.704301969  | 0.48124474  | 0.64167488  |
| ENSG00000145241 | 215.7497912 | -0.214798127 | 0.128073728 | -1.677144334 | 0.093514261 | 0.199120028 |
| ENSG00000145242 | 175.4444137 | 0.382550122  | 0.15067579  | 2.538895744  | 0.011120296 | 0.03530097  |
| ENSG00000145246 | 94.3467817  | 0.712036948  | 0.194564189 | 3.65965059   | 0.000252559 | 0.001317868 |
| ENSG00000145248 | 33.7246094  | -0.023027174 | 0.310467184 | -0.074169429 | 0.940875571 | 0.967262249 |
| ENSG00000145284 | 34.64051648 | -2.702748003 | 0.372281113 | -7.259965418 | 3.87E-13    | 8.02E-12    |
| ENSG00000145287 | 55.35426326 | -2.910621634 | 0.308800063 | -9.425586266 | 4.28E-21    | 1.54E-19    |
| ENSG00000145293 | 130.6289114 | 0.098753365  | 0.158113299 | 0.624573429  | 0.532251063 | 0.683849875 |
| ENSG00000145331 | 37.84279922 | 0.40536604   | 0.280076403 | 1.447340922  | 0.147801463 | 0.281934703 |
| ENSG00000145332 | 240.1828294 | 0.059462019  | 0.122815421 | 0.484157599  | 0.628274026 | 0.758910074 |
| ENSG00000145335 | 523.6392547 | -2.182759764 | 0.102331898 | -21.3301992  | 5.96E-101   | 1.52E-98    |
| ENSG00000145348 | 184.3475517 | -0.185291685 | 0.142642007 | -1.298998022 | 0.193944608 | 0.34476587  |
| ENSG00000145349 | 318.9684424 | 0.327782486  | 0.111383731 | 2.942821915  | 0.003252354 | 0.012367575 |
| ENSG00000145354 | 113.9473337 | 0.003545105  | 0.17542515  | 0.020208646  | 0.983876931 | 0.991961125 |
| ENSG00000145362 | 548.5376219 | -0.114152344 | 0.087086859 | -1.310787244 | 0.189929653 | 0.339346457 |
| ENSG00000145365 | 34.7803053  | 0.674633006  | 0.301130713 | 2.240332774  | 0.025069327 | 0.069443667 |
| ENSG00000145375 | 230.129935  | -0.432792271 | 0.122142381 | -3.543342347 | 0.000395089 | 0.001961761 |

|                 |             |              |             |              |             |             |
|-----------------|-------------|--------------|-------------|--------------|-------------|-------------|
| ENSG00000145386 | 584.307419  | -0.025575087 | 0.093532837 | -0.27343431  | 0.784519381 | 0.871011269 |
| ENSG00000145388 | 186.0300293 | -0.203527826 | 0.136608802 | -1.489858797 | 0.136261367 | 0.265805225 |
| ENSG00000145390 | 208.1038301 | -0.720316299 | 0.130284155 | -5.528809698 | 3.22E-08    | 3.68E-07    |
| ENSG00000145391 | 635.7292116 | -0.301684758 | 0.08384082  | -3.598303987 | 0.000320299 | 0.00162898  |
| ENSG00000145414 | 180.2840797 | 0.067605003  | 0.146064628 | 0.462843085  | 0.643476846 | 0.769990566 |
| ENSG00000145416 | 10.92106687 | -0.806561704 | 0.537769747 | -1.499827219 | 0.133659165 | 0.262075696 |
| ENSG00000145425 | 180.2236898 | 0.04392167   | 0.139891069 | 0.313970512  | 0.753543435 | 0.851091472 |
| ENSG00000145428 | 42.48985877 | 0.127015253  | 0.265241642 | 0.478866182  | 0.63203383  | 0.761813902 |
| ENSG00000145431 | 53.41056719 | -1.041281735 | 0.249234787 | -4.177914912 | 2.94E-05    | 0.000190264 |
| ENSG00000145439 | 254.9650956 | 0.010344528  | 0.127857891 | 0.080906453  | 0.935516348 | 0.964731953 |
| ENSG00000145451 | 14.71071709 | -6.18366422  | 1.235051737 | -5.006805818 | 5.53E-07    | 5.19E-06    |
| ENSG00000145476 | 147.4716441 | -0.25859805  | 0.149267367 | -1.732448667 | 0.083193709 | 0.182113454 |
| ENSG00000145494 | 1017.392551 | 0.121121954  | 0.076611957 | 1.58097977   | 0.113882663 | 0.23194284  |
| ENSG00000145495 | 862.6588721 | -0.084718871 | 0.078745182 | -1.075861013 | 0.28198942  | 0.451202345 |
| ENSG00000145506 | 36.92056972 | -0.699041614 | 0.289894682 | -2.411364049 | 0.015892976 | 0.047866345 |
| ENSG00000145545 | 80.40226728 | -0.255333738 | 0.196948204 | -1.296451213 | 0.194820078 | 0.346015632 |
| ENSG00000145592 | 6461.173477 | 0.228678503  | 0.06470877  | 3.533964602  | 0.000409376 | 0.002023465 |
| ENSG00000145604 | 431.4661976 | 0.101897128  | 0.100132705 | 1.017620844  | 0.308858178 | 0.480085296 |
| ENSG00000145623 | 5.435065621 | -5.723881768 | 1.322766292 | -4.327205647 | 1.51E-05    | 0.000104137 |
| ENSG00000145632 | 56.38991838 | -1.781249408 | 0.2593546   | -6.86800776  | 6.51E-12    | 1.17E-10    |
| ENSG00000145642 | 25.12734079 | 0.387822747  | 0.34842664  | 1.113068585  | 0.265678975 | 0.432478778 |
| ENSG00000145675 | 281.346225  | -0.524203632 | 0.115429389 | -4.541335941 | 5.59E-06    | 4.25E-05    |
| ENSG00000145685 | 209.5204685 | 0.170763345  | 0.128365514 | 1.330289879  | 0.18342278  | 0.330678763 |
| ENSG00000145687 | 486.9901199 | -0.151396633 | 0.106764377 | -1.41804445  | 0.156177788 | 0.293803319 |
| ENSG00000145700 | 21.98558555 | -1.485870445 | 0.423781116 | -3.506221462 | 0.000454517 | 0.00222305  |
| ENSG00000145703 | 21.91039456 | -4.0537954   | 0.636361277 | -6.370273537 | 1.89E-10    | 2.87E-09    |
| ENSG00000145715 | 303.3358324 | 0.359706744  | 0.109392189 | 3.288230624  | 0.001008192 | 0.004528965 |
| ENSG00000145723 | 28.29290941 | -0.210127402 | 0.331578427 | -0.633718556 | 0.526264513 | 0.679389542 |
| ENSG00000145725 | 376.8673726 | -0.269174817 | 0.100356929 | -2.682174724 | 0.007314525 | 0.024763869 |
| ENSG00000145730 | 440.8203218 | 0.447883643  | 0.107136887 | 4.180480285  | 2.91E-05    | 0.000188477 |
| ENSG00000145734 | 1443.058325 | 0.085600826  | 0.068289283 | 1.253503071  | 0.210022682 | 0.365122354 |
| ENSG00000145736 | 11.19288188 | 0.073257058  | 0.520266867 | 0.140806695  | 0.888022654 | 0.938604531 |
| ENSG00000145740 | 358.8356832 | 0.045055766  | 0.113132091 | 0.398258046  | 0.690439982 | 0.805254219 |
| ENSG00000145741 | 2199.382687 | 0.263931686  | 0.058994442 | 4.47383989   | 7.68E-06    | 5.65E-05    |
| ENSG00000145743 | 134.0397174 | -0.127966629 | 0.164718518 | -0.776880649 | 0.437229189 | 0.603138409 |
| ENSG00000145779 | 19.21339396 | -0.723616233 | 0.42216166  | -1.714073784 | 0.086515176 | 0.187600907 |
| ENSG00000145780 | 165.4664453 | -0.061921697 | 0.14888702  | -0.415897213 | 0.677485219 | 0.795306274 |
| ENSG00000145781 | 82.92905076 | -0.071413792 | 0.194175717 | -0.367779211 | 0.713037872 | 0.820852564 |
| ENSG00000145782 | 329.7616529 | 0.156756175  | 0.107000943 | 1.46499807   | 0.142921444 | 0.275091467 |
| ENSG00000145808 | 51.7412408  | -0.229346024 | 0.254794889 | -0.90012019  | 0.368056293 | 0.539393505 |
| ENSG00000145817 | 166.5319622 | 0.099428396  | 0.144655702 | 0.687345159  | 0.491865247 | 0.651295106 |
| ENSG00000145819 | 39.29993418 | -0.164419566 | 0.281590738 | -0.583895503 | 0.559290619 | 0.70606231  |
| ENSG00000145833 | 2792.459861 | 0.120369974  | 0.061439936 | 1.959148739  | 0.05009537  | 0.122047589 |
| ENSG00000145860 | 567.2588166 | -0.411104952 | 0.088705353 | -4.634499911 | 3.58E-06    | 2.83E-05    |
| ENSG00000145868 | 179.6442467 | -0.089397123 | 0.143460203 | -0.623149281 | 0.533186427 | 0.684613322 |
| ENSG00000145882 | 180.3203028 | -0.548703523 | 0.144423752 | -3.799260964 | 0.000145128 | 0.000804188 |
| ENSG00000145901 | 251.4055293 | 0.313892481  | 0.120059844 | 2.614466844  | 0.008936683 | 0.029343991 |
| ENSG00000145907 | 1771.730531 | -0.37206492  | 0.062845751 | -5.920287629 | 3.21E-09    | 4.19E-08    |
| ENSG00000145911 | 16.00432928 | -0.646615841 | 0.454977563 | -1.421203798 | 0.155257521 | 0.292709201 |
| ENSG00000145912 | 702.4878462 | 0.445586871  | 0.085243283 | 5.22723731   | 1.72E-07    | 1.75E-06    |

|                 |             |              |             |              |             |             |
|-----------------|-------------|--------------|-------------|--------------|-------------|-------------|
| ENSG00000145916 | 228.3617358 | 0.012366258  | 0.125623231 | 0.098439262  | 0.921583499 | 0.956727767 |
| ENSG00000145919 | 230.8682482 | 0.111064618  | 0.127962047 | 0.867949689  | 0.385421876 | 0.554301889 |
| ENSG00000145979 | 28.02054357 | -0.185721901 | 0.337048991 | -0.551023461 | 0.581617592 | 0.723904157 |
| ENSG00000145982 | 70.08602912 | -0.041882652 | 0.219670184 | -0.190661524 | 0.848790785 | 0.91321723  |
| ENSG00000145990 | 184.6826512 | 0.108859626  | 0.135039314 | 0.806132839  | 0.420166258 | 0.587797573 |
| ENSG00000145996 | 182.3938569 | -0.239041834 | 0.142358814 | -1.679150226 | 0.09312277  | 0.198548295 |
| ENSG00000146007 | 155.9218928 | -0.08280292  | 0.145200867 | -0.570264639 | 0.56849822  | 0.713900814 |
| ENSG00000146021 | 112.9022989 | 0.184086389  | 0.17417667  | 1.056894636  | 0.290559677 | 0.460873055 |
| ENSG00000146054 | 13.84373951 | -2.436804117 | 0.567368508 | -4.294923109 | 1.75E-05    | 0.000118875 |
| ENSG00000146063 | 357.851791  | 0.015790522  | 0.104359017 | 0.151309609  | 0.879731489 | 0.934004754 |
| ENSG00000146066 | 727.3839374 | 0.321983791  | 0.101391881 | 3.175636836  | 0.00149508  | 0.006373714 |
| ENSG00000146067 | 167.0786963 | 0.203567205  | 0.142351579 | 1.430031245  | 0.152708052 | 0.289017785 |
| ENSG00000146072 | 25.16962566 | -0.685506404 | 0.378537611 | -1.810933403 | 0.070151161 | 0.159245857 |
| ENSG00000146083 | 663.253339  | 0.163513244  | 0.082854564 | 1.973497128  | 0.048438951 | 0.11903813  |
| ENSG00000146085 | 99.93591407 | 0.17482253   | 0.181681548 | 0.962247026  | 0.335925532 | 0.507774233 |
| ENSG00000146090 | 24.10366609 | -0.051568281 | 0.356901068 | -0.144489008 | 0.885114336 | 0.937067517 |
| ENSG00000146094 | 61.63713518 | 0.089825303  | 0.225669855 | 0.398038557  | 0.690601764 | 0.805319856 |
| ENSG00000146109 | 159.0534915 | 0.047021893  | 0.144493903 | 0.325424752  | 0.744859625 | 0.844210781 |
| ENSG00000146112 | 563.9013078 | 0.14309111   | 0.09073214  | 1.577071926  | 0.114778976 | 0.233497506 |
| ENSG00000146143 | 102.7521586 | -0.056054627 | 0.175641252 | -0.31914272  | 0.74961829  | 0.848021916 |
| ENSG00000146147 | 10.45223607 | -6.666484157 | 1.254056795 | -5.3159348   | 1.06E-07    | 1.11E-06    |
| ENSG00000146197 | 39.40245162 | -1.32545507  | 0.295564344 | -4.484489073 | 7.31E-06    | 5.40E-05    |
| ENSG00000146205 | 68.23078291 | 0.325154165  | 0.242624823 | 1.340152093  | 0.180195903 | 0.326439495 |
| ENSG00000146221 | 12.58651952 | -0.556000118 | 0.490856562 | -1.132714038 | 0.257334361 | 0.423176746 |
| ENSG00000146223 | 511.3705533 | -0.108340844 | 0.090633804 | -1.195369042 | 0.231942876 | 0.391692904 |
| ENSG00000146232 | 50.28897708 | 0.139914612  | 0.252287986 | 0.554582936  | 0.579179963 | 0.72253472  |
| ENSG00000146242 | 155.1898259 | -0.027778503 | 0.146962483 | -0.189017646 | 0.850078987 | 0.914253084 |
| ENSG00000146243 | 69.400541   | -0.520473011 | 0.221825791 | -2.346314229 | 0.018960115 | 0.055267221 |
| ENSG00000146247 | 3377.658871 | -0.588400617 | 0.065656212 | -8.961842249 | 3.19E-19    | 1.04E-17    |
| ENSG00000146263 | 295.5142324 | -0.333536099 | 0.11291905  | -2.953762883 | 0.003139251 | 0.012002466 |
| ENSG00000146267 | 97.60089695 | -0.366091795 | 0.184501419 | -1.984222107 | 0.047231085 | 0.116559215 |
| ENSG00000146276 | 93.38626513 | -3.848845167 | 0.290670463 | -13.24126684 | 5.07E-40    | 3.96E-38    |
| ENSG00000146278 | 898.9377541 | -0.347661941 | 0.076452621 | -4.547416888 | 5.43E-06    | 4.13E-05    |
| ENSG00000146281 | 435.0997954 | 0.092705941  | 0.097029808 | 0.955437752  | 0.33935637  | 0.511145071 |
| ENSG00000146282 | 325.856083  | -0.012581442 | 0.108467886 | -0.115992327 | 0.907658623 | 0.950649754 |
| ENSG00000146350 | 136.5798964 | -0.961007568 | 0.161533623 | -5.949272678 | 2.69E-09    | 3.54E-08    |
| ENSG00000146373 | 81.69663911 | 0.278915564  | 0.19638854  | 1.420223212  | 0.155542708 | 0.2930796   |
| ENSG00000146376 | 17.43091577 | 0.763503061  | 0.426661113 | 1.789483593  | 0.073536967 | 0.164985431 |
| ENSG00000146386 | 160.7678445 | 0.284104334  | 0.153560712 | 1.850110815  | 0.064297579 | 0.148844446 |
| ENSG00000146409 | 128.0619093 | 0.084942687  | 0.159672457 | 0.531980835  | 0.594739269 | 0.734702534 |
| ENSG00000146410 | 44.89854898 | -0.366283509 | 0.264498947 | -1.384820291 | 0.166107425 | 0.30782467  |
| ENSG00000146411 | 36.01488473 | 0.250827111  | 0.312679666 | 0.802185555  | 0.422445631 | 0.589928798 |
| ENSG00000146414 | 552.0194732 | -0.178410643 | 0.092977522 | -1.918857796 | 0.055002333 | 0.131554192 |
| ENSG00000146416 | 96.54703736 | 0.043852028  | 0.191877606 | 0.228541666  | 0.819225168 | 0.893395096 |
| ENSG00000146425 | 175.4537011 | -0.295060155 | 0.145975714 | -2.021296197 | 0.043249113 | 0.108991799 |
| ENSG00000146426 | 37.57784511 | -2.822761578 | 0.370389858 | -7.621055274 | 2.52E-14    | 5.79E-13    |
| ENSG00000146433 | 299.18969   | -0.155543328 | 0.110968174 | -1.401693134 | 0.161006902 | 0.300274024 |
| ENSG00000146457 | 385.6261866 | -0.125813894 | 0.106900807 | -1.176921838 | 0.239226705 | 0.401148087 |
| ENSG00000146463 | 767.60535   | -0.073439194 | 0.078764445 | -0.932390165 | 0.351134926 | 0.522671567 |
| ENSG00000146476 | 111.9715401 | 0.033203946  | 0.176577146 | 0.188042149  | 0.850843611 | 0.914488597 |

|                 |             |              |             |              |             |             |
|-----------------|-------------|--------------|-------------|--------------|-------------|-------------|
| ENSG00000146530 | 159.4258844 | -0.491625008 | 0.14550268  | -3.378803795 | 0.000728019 | 0.003384014 |
| ENSG00000146535 | 333.2901241 | 0.159199199  | 0.105548462 | 1.508304295  | 0.131476664 | 0.258882943 |
| ENSG00000146540 | 378.9171679 | 0.141839917  | 0.105461701 | 1.344942441  | 0.178643823 | 0.324380789 |
| ENSG00000146576 | 190.957008  | -0.015499669 | 0.136936569 | -0.113188676 | 0.909880973 | 0.951381168 |
| ENSG00000146587 | 336.9308533 | -0.183500924 | 0.103795453 | -1.767909086 | 0.077076104 | 0.171392754 |
| ENSG00000146648 | 126.6776617 | 0.206239559  | 0.16082404  | 1.282392606  | 0.199704957 | 0.351712077 |
| ENSG00000146670 | 328.3893383 | 0.252441495  | 0.11346401  | 2.224859621  | 0.026090663 | 0.071904169 |
| ENSG00000146676 | 238.6439926 | -0.379146499 | 0.120632194 | -3.142995961 | 0.001672281 | 0.007020484 |
| ENSG00000146677 | 27.82350612 | 0.470387689  | 0.345473488 | 1.361573914  | 0.173332392 | 0.317113847 |
| ENSG00000146700 | 8.428626917 | 0.450496534  | 0.594257282 | 0.758083322  | 0.448401104 | 0.613488877 |
| ENSG00000146701 | 2893.424756 | 0.144829986  | 0.062591447 | 2.313894211  | 0.020673526 | 0.059374569 |
| ENSG00000146707 | 36.93614829 | 0.25144361   | 0.283152876 | 0.888013616  | 0.374533427 | 0.54453973  |
| ENSG00000146729 | 523.6700394 | -0.12847835  | 0.096082262 | -1.33717033  | 0.181167044 | 0.3278575   |
| ENSG00000146731 | 2078.135118 | 0.202166877  | 0.065966533 | 3.064688556  | 0.002178968 | 0.008782772 |
| ENSG00000146733 | 217.1992768 | -0.649110838 | 0.127930542 | -5.073931745 | 3.90E-07    | 3.75E-06    |
| ENSG00000146757 | 103.1641694 | -0.310469118 | 0.186879884 | -1.661329787 | 0.096647231 | 0.204150925 |
| ENSG00000146776 | 303.7802784 | 0.784685355  | 0.113768775 | 6.897194365  | 5.30E-12    | 9.66E-11    |
| ENSG00000146802 | 205.1391195 | 0.287022425  | 0.129174081 | 2.221981554  | 0.026284552 | 0.072324996 |
| ENSG00000146826 | 45.63543184 | -0.289159117 | 0.279563333 | -1.034324186 | 0.300984634 | 0.471393818 |
| ENSG00000146828 | 80.03239829 | -0.128175756 | 0.202508347 | -0.632940607 | 0.526772429 | 0.679920271 |
| ENSG00000146830 | 605.6024315 | 0.223490366  | 0.096998331 | 2.304064042  | 0.021219049 | 0.060631403 |
| ENSG00000146833 | 80.18988211 | -0.256244402 | 0.207190945 | -1.236754827 | 0.216178117 | 0.372458483 |
| ENSG00000146834 | 75.31201982 | -0.003607041 | 0.400218555 | -0.009012678 | 0.992809021 | 0.996284349 |
| ENSG00000146842 | 210.9432433 | 0.406789706  | 0.134746887 | 3.018917272  | 0.002536798 | 0.010006949 |
| ENSG00000146856 | 16.49034918 | -0.51503284  | 0.442575807 | -1.163716661 | 0.244538855 | 0.40776796  |
| ENSG00000146858 | 298.4601958 | 0.709342482  | 0.129456114 | 5.479405032  | 4.27E-08    | 4.78E-07    |
| ENSG00000146872 | 381.5901221 | -0.206269    | 0.101535828 | -2.031489812 | 0.042205332 | 0.106859823 |
| ENSG00000146909 | 926.8344827 | 0.673423172  | 0.084134485 | 8.004127856  | 1.20E-15    | 3.07E-14    |
| ENSG00000146918 | 463.388199  | 0.565567772  | 0.097068704 | 5.826468738  | 5.66E-09    | 7.19E-08    |
| ENSG00000146950 | 17.2397206  | -0.535981277 | 0.424638546 | -1.262205899 | 0.206874707 | 0.360788542 |
| ENSG00000146963 | 485.289894  | 0.45584145   | 0.09166094  | 4.973126478  | 6.59E-07    | 6.08E-06    |
| ENSG00000147010 | 286.1603985 | -0.004609663 | 0.112900284 | -0.040829506 | 0.967431817 | 0.982880628 |
| ENSG00000147027 | 21.71667563 | -3.025571037 | 0.521750623 | -5.798883424 | 6.68E-09    | 8.43E-08    |
| ENSG00000147044 | 318.8105747 | -0.397789535 | 0.108770871 | -3.657132958 | 0.000255052 | 0.001329394 |
| ENSG00000147050 | 491.5376283 | -0.215324346 | 0.101710244 | -2.117036973 | 0.03425671  | 0.089877476 |
| ENSG00000147065 | 922.7307421 | 0.130567916  | 0.0753511   | 1.732793775  | 0.08313233  | 0.182007456 |
| ENSG00000147082 | 21.93346268 | -1.060444241 | 0.393845483 | -2.69253879  | 0.007091029 | 0.024094746 |
| ENSG00000147099 | 240.1588414 | 0.072863422  | 0.132598237 | 0.549505205  | 0.582658793 | 0.724878936 |
| ENSG00000147100 | 427.3189646 | 0.202430095  | 0.097879666 | 2.068152699  | 0.038625667 | 0.099046137 |
| ENSG00000147117 | 12.69144334 | -0.161538949 | 0.494641001 | -0.326578162 | 0.743986963 | 0.843553545 |
| ENSG00000147118 | 47.69438866 | 0.337380274  | 0.263181063 | 1.281932177  | 0.199866439 | 0.351952347 |
| ENSG00000147119 | 39.35866692 | 0.31616107   | 0.300498967 | 1.052120321  | 0.29274435  | 0.463396426 |
| ENSG00000147121 | 46.79536009 | 0.007182518  | 0.25628093  | 0.028025956  | 0.977641449 | 0.988629033 |
| ENSG00000147123 | 669.0846232 | 0.352051404  | 0.089619353 | 3.928296626  | 8.55E-05    | 0.000500924 |
| ENSG00000147124 | 130.3303332 | -0.576583628 | 0.165559943 | -3.482627616 | 0.000496519 | 0.002407523 |
| ENSG00000147130 | 964.7362978 | -0.068119527 | 0.077752892 | -0.876102817 | 0.380974142 | 0.550538001 |
| ENSG00000147133 | 594.9466568 | -0.14655721  | 0.091187352 | -1.607209849 | 0.108008342 | 0.222756303 |
| ENSG00000147140 | 2510.118944 | 0.246050066  | 0.070022424 | 3.513875283  | 0.00044162  | 0.002169034 |
| ENSG00000147144 | 34.01144187 | 0.220585136  | 0.310066347 | 0.711412697  | 0.476828533 | 0.63753861  |
| ENSG00000147155 | 352.0293292 | -0.023790616 | 0.265330823 | -0.089663974 | 0.928554246 | 0.96098147  |

|                 |             |              |             |              |             |             |
|-----------------|-------------|--------------|-------------|--------------|-------------|-------------|
| ENSG00000147162 | 1387.067682 | 0.009083817  | 0.077035081 | 0.117917929  | 0.906132687 | 0.949742267 |
| ENSG00000147164 | 405.9667128 | 0.31552632   | 0.098942867 | 3.188974891  | 0.001427783 | 0.006122814 |
| ENSG00000147166 | 12.1332492  | -0.418614015 | 0.495094103 | -0.84552414  | 0.397818261 | 0.565946233 |
| ENSG00000147174 | 11.34506407 | -0.358261033 | 0.516360425 | -0.693819696 | 0.487795289 | 0.647887711 |
| ENSG00000147180 | 280.2667652 | -0.174376433 | 0.11732468  | -1.486272401 | 0.137207084 | 0.266871768 |
| ENSG00000147202 | 365.9782241 | 0.223576399  | 0.104732315 | 2.134741304  | 0.032782147 | 0.086574698 |
| ENSG00000147224 | 401.304466  | 0.082835922  | 0.100419683 | 0.824897267  | 0.409429918 | 0.577842063 |
| ENSG00000147251 | 37.31877704 | 1.081214731  | 0.291470226 | 3.709520331  | 0.000207652 | 0.00110698  |
| ENSG00000147257 | 32.60510255 | -0.15700188  | 0.316951065 | -0.495350537 | 0.620352703 | 0.75361882  |
| ENSG00000147274 | 1540.872445 | -0.132649218 | 0.066424614 | -1.996988926 | 0.045826386 | 0.113913156 |
| ENSG00000147316 | 440.2769627 | 0.071817372  | 0.100108121 | 0.717398055  | 0.473128519 | 0.63440591  |
| ENSG00000147324 | 303.1197442 | 0.035921858  | 0.111792696 | 0.321325623  | 0.747963641 | 0.846695565 |
| ENSG00000147364 | 20.65539299 | 1.035173324  | 0.385378702 | 2.686119703  | 0.007228719 | 0.024521084 |
| ENSG00000147383 | 137.8606874 | 0.144744357  | 0.156779618 | 0.923234535  | 0.355884995 | 0.527227319 |
| ENSG00000147394 | 21.76460082 | 1.666233277  | 0.402700041 | 4.137653609  | 3.51E-05    | 0.000223627 |
| ENSG00000147400 | 46.58867429 | -0.0926378   | 0.279585083 | -0.33134028  | 0.740387469 | 0.841305838 |
| ENSG00000147403 | 2266.838324 | 0.163302784  | 0.076678198 | 2.129715978  | 0.033195069 | 0.087489073 |
| ENSG00000147416 | 308.3056613 | 0.114574123  | 0.11965599  | 0.957529356  | 0.338300136 | 0.510265437 |
| ENSG00000147419 | 324.5798248 | 0.086656982  | 0.112545813 | 0.769970726  | 0.441317258 | 0.60654127  |
| ENSG00000147421 | 290.6807853 | -0.099904994 | 0.119616521 | -0.835210664 | 0.403599107 | 0.57179593  |
| ENSG00000147439 | 89.74964628 | -0.286969331 | 0.187498023 | -1.530519238 | 0.125888255 | 0.250830117 |
| ENSG00000147454 | 572.9755472 | 0.279575003  | 0.086330259 | 3.238435828  | 0.001201871 | 0.00526432  |
| ENSG00000147457 | 249.3870562 | 0.160112094  | 0.12088443  | 1.324505515  | 0.185335213 | 0.333257006 |
| ENSG00000147459 | 121.5743484 | 2.355788664  | 0.188404045 | 12.50391768  | 7.11E-36    | 4.78E-34    |
| ENSG00000147471 | 209.2665558 | 0.218940698  | 0.135431307 | 1.61661807   | 0.105960749 | 0.219435447 |
| ENSG00000147475 | 227.9950458 | 0.029970461  | 0.125940628 | 0.237972936  | 0.811902086 | 0.889400967 |
| ENSG00000147509 | 22.23631873 | -1.188467392 | 0.393274642 | -3.02197819  | 0.002511286 | 0.009925729 |
| ENSG00000147526 | 166.1921482 | -0.315807179 | 0.146595208 | -2.154280364 | 0.031218192 | 0.083210994 |
| ENSG00000147533 | 232.6332031 | -0.152037405 | 0.122098863 | -1.245199191 | 0.21305854  | 0.368439408 |
| ENSG00000147535 | 138.2723123 | 0.778592776  | 0.156842356 | 4.964174192  | 6.90E-07    | 6.33E-06    |
| ENSG00000147536 | 133.1140569 | -0.286726614 | 0.163194285 | -1.756964796 | 0.07892381  | 0.174617969 |
| ENSG00000147548 | 1128.282515 | 0.160882468  | 0.069110345 | 2.327907158  | 0.019917034 | 0.057578633 |
| ENSG00000147576 | 8.664196928 | -1.391763207 | 0.665297492 | -2.09194116  | 0.03644378  | 0.094579564 |
| ENSG00000147586 | 40.84768837 | -0.589259923 | 0.282273935 | -2.087546353 | 0.036838776 | 0.095344332 |
| ENSG00000147592 | 159.2376443 | 0.000498621  | 0.152502275 | 0.003269596  | 0.997391245 | 0.998813347 |
| ENSG00000147601 | 269.906828  | -0.774933711 | 0.119214893 | -6.500309559 | 8.02E-11    | 1.29E-09    |
| ENSG00000147604 | 482.1977749 | -0.126339936 | 0.120743927 | -1.046346095 | 0.295401271 | 0.465817428 |
| ENSG00000147649 | 1539.01156  | 0.162384183  | 0.067182984 | 2.417043328  | 0.015647154 | 0.047206954 |
| ENSG00000147650 | 281.7255481 | 0.061572152  | 0.12127484  | 0.507707555  | 0.61165845  | 0.747517508 |
| ENSG00000147654 | 119.8686812 | 0.122679617  | 0.175504318 | 0.699011958  | 0.484544558 | 0.645033871 |
| ENSG00000147669 | 376.7496627 | 0.13627619   | 0.10519027  | 1.295520872  | 0.195140606 | 0.346334948 |
| ENSG00000147677 | 2395.904797 | 0.1681091    | 0.063004208 | 2.668220171  | 0.007625427 | 0.02569053  |
| ENSG00000147679 | 294.8752574 | 0.033262822  | 0.116062283 | 0.286594587  | 0.77442276  | 0.864944408 |
| ENSG00000147684 | 1452.435142 | 0.368931898  | 0.06632456  | 5.562523118  | 2.66E-08    | 3.07E-07    |
| ENSG00000147687 | 356.6668644 | 0.451916516  | 0.104565681 | 4.321843562  | 1.55E-05    | 0.000106342 |
| ENSG00000147789 | 262.1461259 | 0.223395196  | 0.119382073 | 1.871262495  | 0.061308706 | 0.143295246 |
| ENSG00000147799 | 203.7298511 | -0.094285871 | 0.131823423 | -0.715243685 | 0.47445848  | 0.635643135 |
| ENSG00000147804 | 362.5181488 | 0.173105412  | 0.104698052 | 1.653377586  | 0.098254042 | 0.206838489 |
| ENSG00000147813 | 16.32665534 | 0.235351656  | 0.444070741 | 0.529986855  | 0.596121045 | 0.735697796 |
| ENSG00000147852 | 33.51397511 | 0.19370991   | 0.296832624 | 0.652589691  | 0.514020834 | 0.669862756 |

|                 |             |              |             |              |             |             |
|-----------------|-------------|--------------|-------------|--------------|-------------|-------------|
| ENSG00000147853 | 248.2045805 | 0.002742813  | 0.128564137 | 0.021334202  | 0.982979061 | 0.991662372 |
| ENSG00000147854 | 313.7931343 | -0.195191673 | 0.11434215  | -1.707084161 | 0.087806411 | 0.189552275 |
| ENSG00000147862 | 821.7260313 | -0.541630198 | 0.078404485 | -6.908153268 | 4.91E-12    | 8.98E-11    |
| ENSG00000147869 | 24.9110404  | -1.041805429 | 0.36816745  | -2.829705424 | 0.004659088 | 0.016863233 |
| ENSG00000147872 | 168.779406  | 0.204521871  | 0.142840449 | 1.431820415  | 0.152195223 | 0.288402768 |
| ENSG00000147874 | 342.1777469 | -0.186570762 | 0.105980494 | -1.760425471 | 0.078335694 | 0.173726159 |
| ENSG00000147889 | 46.84857    | 0.65808018   | 0.264256094 | 2.490312224  | 0.012763092 | 0.039729654 |
| ENSG00000147894 | 34.36813572 | 0.162081691  | 0.302687909 | 0.535474614  | 0.592321707 | 0.732618035 |
| ENSG00000147905 | 177.5479842 | 0.222660501  | 0.139512161 | 1.595993493  | 0.110490246 | 0.226776226 |
| ENSG00000147912 | 61.64620355 | 0.050908949  | 0.23936356  | 0.212684624  | 0.83157296  | 0.901477895 |
| ENSG00000147955 | 2342.170801 | 0.417609257  | 0.07013947  | 5.953983639  | 2.62E-09    | 3.45E-08    |
| ENSG00000147996 | 187.6020227 | 0.210677953  | 0.133847313 | 1.574017053  | 0.115483507 | 0.234421507 |
| ENSG00000148019 | 435.4437989 | -0.315931127 | 0.09817532  | -3.218030029 | 0.001290743 | 0.005601195 |
| ENSG00000148057 | 19.50000748 | -0.146289601 | 0.387126129 | -0.377886147 | 0.705515174 | 0.815198787 |
| ENSG00000148082 | 9.44098588  | -5.534626174 | 1.265399242 | -4.373818153 | 1.22E-05    | 8.58E-05    |
| ENSG00000148090 | 89.98569154 | 0.176578018  | 0.188839388 | 0.935069852  | 0.349752302 | 0.521768329 |
| ENSG00000148110 | 392.628815  | 0.002941387  | 0.10391984  | 0.028304379  | 0.977419388 | 0.988629033 |
| ENSG00000148120 | 77.06099585 | -0.863457188 | 0.20381745  | -4.236424242 | 2.27E-05    | 0.000150907 |
| ENSG00000148143 | 772.8583502 | -0.250020319 | 0.08264041  | -3.025400283 | 0.002483043 | 0.009839013 |
| ENSG00000148153 | 174.8997951 | 0.263493962  | 0.138545533 | 1.901858228  | 0.057189692 | 0.135388028 |
| ENSG00000148154 | 136.928874  | -0.44878504  | 0.154470913 | -2.9053045   | 0.00366896  | 0.01372148  |
| ENSG00000148158 | 266.6144798 | 0.199703359  | 0.120140047 | 1.662254714  | 0.096461714 | 0.203881687 |
| ENSG00000148175 | 623.8075656 | 0.404700154  | 0.091723169 | 4.412191157  | 1.02E-05    | 7.32E-05    |
| ENSG00000148180 | 1410.121094 | -0.272647191 | 0.072228152 | -3.774805049 | 0.000160133 | 0.000877638 |
| ENSG00000148187 | 283.1754653 | 0.022173975  | 0.115427343 | 0.192103315  | 0.847661279 | 0.912351389 |
| ENSG00000148200 | 178.4704312 | -0.831218892 | 0.139193729 | -5.971669127 | 2.35E-09    | 3.13E-08    |
| ENSG00000148218 | 189.0787609 | 0.257148073  | 0.13521075  | 1.901831574  | 0.057193177 | 0.135388028 |
| ENSG00000148219 | 68.70738052 | -0.628776743 | 0.218391692 | -2.879123921 | 0.003987816 | 0.014776273 |
| ENSG00000148225 | 49.38401703 | -0.947201007 | 0.256894545 | -3.687119967 | 0.000226806 | 0.001196376 |
| ENSG00000148229 | 545.4399638 | -0.036780925 | 0.092584633 | -0.397268142 | 0.691169738 | 0.805563918 |
| ENSG00000148248 | 1133.940543 | 0.002460091  | 0.074002885 | 0.03324318   | 0.973480665 | 0.986330341 |
| ENSG00000148288 | 12.5331195  | -0.6941916   | 0.497698181 | -1.394804376 | 0.163074839 | 0.303365417 |
| ENSG00000148290 | 42.53303572 | -0.258096772 | 0.282600597 | -0.913291673 | 0.361089161 | 0.532125413 |
| ENSG00000148291 | 190.4074686 | 0.573242344  | 0.139584553 | 4.106774944  | 4.01E-05    | 0.000252507 |
| ENSG00000148296 | 540.0981645 | 0.195016875  | 0.095072871 | 2.051235782  | 0.040243991 | 0.102281046 |
| ENSG00000148297 | 286.4889911 | 0.110231404  | 0.113131856 | 0.974362193  | 0.329876735 | 0.502255933 |
| ENSG00000148300 | 443.1414628 | 0.111733871  | 0.095465727 | 1.170408219  | 0.24183673  | 0.404510662 |
| ENSG00000148303 | 2985.124652 | 0.067062275  | 0.158178665 | 0.423965363  | 0.671591074 | 0.790699842 |
| ENSG00000148308 | 412.7187465 | -0.062527027 | 0.100014929 | -0.625176943 | 0.531854933 | 0.683490917 |
| ENSG00000148331 | 268.1902542 | -0.191120756 | 0.117109645 | -1.63198135  | 0.102683415 | 0.214132116 |
| ENSG00000148334 | 467.0923485 | 0.238432425  | 0.096007682 | 2.483472363  | 0.013010843 | 0.040380758 |
| ENSG00000148335 | 178.0841066 | 0.08903735   | 0.140015749 | 0.635909539  | 0.524835385 | 0.678167846 |
| ENSG00000148337 | 1215.629295 | 0.026112269  | 0.069476289 | 0.375844318  | 0.707032638 | 0.816145642 |
| ENSG00000148339 | 266.485403  | -0.043231303 | 0.122006261 | -0.354336754 | 0.723086527 | 0.828279902 |
| ENSG00000148341 | 260.2020329 | 0.157985253  | 0.125623655 | 1.25760751   | 0.208533736 | 0.362983072 |
| ENSG00000148343 | 134.9600717 | -0.08741746  | 0.153730143 | -0.56864229  | 0.569598919 | 0.714810407 |
| ENSG00000148344 | 69.5266453  | 0.203635373  | 0.215808567 | 0.943592629  | 0.34537786  | 0.517109657 |
| ENSG00000148356 | 139.068295  | 0.516245512  | 0.15484291  | 3.333995161  | 0.000856081 | 0.003905611 |
| ENSG00000148358 | 489.5551337 | -0.00905595  | 0.095879187 | -0.09445168  | 0.924750364 | 0.958810774 |
| ENSG00000148362 | 50.70731676 | 0.250723651  | 0.265502492 | 0.944336337  | 0.344997803 | 0.516705846 |



|                 |             |              |             |              |             |             |
|-----------------|-------------|--------------|-------------|--------------|-------------|-------------|
| ENSG00000148384 | 184.6990202 | 0.736998668  | 0.144842613 | 5.088272385  | 3.61E-07    | 3.50E-06    |
| ENSG00000148396 | 2120.832557 | 0.029188707  | 0.06792442  | 0.42972331   | 0.667396925 | 0.787413177 |
| ENSG00000148399 | 149.6723054 | -0.07174318  | 0.154360951 | -0.464775449 | 0.642092271 | 0.768923285 |
| ENSG00000148400 | 775.3647133 | 0.560965009  | 0.086391115 | 6.49331831   | 8.40E-11    | 1.34E-09    |
| ENSG00000148408 | 108.2392328 | -0.382942521 | 0.177537346 | -2.156968835 | 0.031008093 | 0.08269806  |
| ENSG00000148411 | 308.0152976 | 0.033088152  | 0.119832811 | 0.2761193    | 0.782456437 | 0.869898344 |
| ENSG00000148426 | 36.8545094  | 0.1354344    | 0.286955656 | 0.471969788  | 0.636948353 | 0.765710468 |
| ENSG00000148429 | 282.3611214 | 0.178271039  | 0.112411385 | 1.585880647  | 0.112766387 | 0.230337274 |
| ENSG00000148444 | 20.6586838  | -0.227828355 | 0.382081796 | -0.596281627 | 0.550987103 | 0.698621617 |
| ENSG00000148450 | 133.8914456 | -0.207616701 | 0.157843902 | -1.315329248 | 0.188399273 | 0.337212612 |
| ENSG00000148459 | 109.7036213 | 0.202624303  | 0.169715518 | 1.193905574  | 0.232514907 | 0.392470187 |
| ENSG00000148468 | 249.2511055 | 0.198382098  | 0.126728315 | 1.565412578  | 0.117486201 | 0.23774095  |
| ENSG00000148481 | 70.67170871 | 0.017231295  | 0.216677622 | 0.079525031  | 0.936615023 | 0.965199268 |
| ENSG00000148484 | 298.3986048 | -0.201918581 | 0.118001856 | -1.711147501 | 0.087053887 | 0.188420024 |
| ENSG00000148498 | 376.5631358 | -0.03318596  | 0.100409481 | -0.330506243 | 0.741017476 | 0.841749352 |
| ENSG00000148516 | 357.3834036 | -0.341735071 | 0.103084583 | -3.315093879 | 0.000916124 | 0.004159272 |
| ENSG00000148572 | 85.10330116 | -0.197769235 | 0.197672058 | -1.000491609 | 0.317072656 | 0.48874351  |
| ENSG00000148600 | 187.8492291 | -0.338851487 | 0.15592823  | -2.173124689 | 0.029770934 | 0.079968486 |
| ENSG00000148606 | 444.1855928 | -0.247806501 | 0.096891203 | -2.557574817 | 0.010540488 | 0.033681128 |
| ENSG00000148634 | 326.5075045 | 0.179166884  | 0.105214979 | 1.702864794  | 0.088593374 | 0.190928371 |
| ENSG00000148660 | 140.693405  | -0.459786458 | 0.154312889 | -2.979572609 | 0.002886508 | 0.011169912 |
| ENSG00000148672 | 558.0458765 | -0.101213276 | 0.092925179 | -1.089191077 | 0.276069633 | 0.444515146 |
| ENSG00000148688 | 136.8807478 | -0.042693985 | 0.153395168 | -0.278326791 | 0.780761512 | 0.868632739 |
| ENSG00000148690 | 325.8231903 | -0.038947166 | 0.109593159 | -0.355379532 | 0.722305281 | 0.827735087 |
| ENSG00000148700 | 406.8757205 | -0.120795205 | 0.109912812 | -1.099009326 | 0.271763998 | 0.439474839 |
| ENSG00000148719 | 461.194874  | 0.290349833  | 0.093901208 | 3.092077723  | 0.001987608 | 0.00813044  |
| ENSG00000148730 | 788.5768689 | -0.217291884 | 0.086265177 | -2.518882943 | 0.011772779 | 0.03705405  |
| ENSG00000148737 | 820.2314977 | -0.031596019 | 0.086419025 | -0.365614158 | 0.714653009 | 0.822240217 |
| ENSG00000148773 | 9167.563667 | -0.024644462 | 0.054104132 | -0.455500557 | 0.648749167 | 0.773893979 |
| ENSG00000148798 | 469.779697  | -0.415724973 | 0.098890064 | -4.203910425 | 2.62E-05    | 0.000172042 |
| ENSG00000148803 | 210.7533629 | 0.343659629  | 0.135722136 | 2.532082379  | 0.011338735 | 0.035880876 |
| ENSG00000148814 | 72.48807041 | 0.215072987  | 0.235838906 | 0.911948713  | 0.361795717 | 0.532552073 |
| ENSG00000148824 | 89.95971425 | 0.445250762  | 0.214548074 | 2.075296011  | 0.037959109 | 0.097604174 |
| ENSG00000148834 | 104.7531925 | 0.341893049  | 0.17502412  | 1.953405334  | 0.050771585 | 0.123282359 |
| ENSG00000148835 | 230.5039203 | 0.13806327   | 0.124043951 | 1.113018972  | 0.265700281 | 0.432478778 |
| ENSG00000148840 | 1004.930233 | 0.094191054  | 0.072859947 | 1.292768627  | 0.196091094 | 0.347131896 |
| ENSG00000148841 | 163.4264512 | -0.414067062 | 0.144758269 | -2.860403525 | 0.004231023 | 0.015525908 |
| ENSG00000148842 | 350.9046343 | -0.112296037 | 0.101993766 | -1.101008828 | 0.270892815 | 0.438500861 |
| ENSG00000148843 | 1489.201768 | 0.21060623   | 0.066641082 | 3.16030628   | 0.001576034 | 0.006660212 |
| ENSG00000148908 | 304.9727876 | 0.211995865  | 0.112492297 | 1.884536721  | 0.059492413 | 0.139836798 |
| ENSG00000148925 | 93.07158649 | 0.122367511  | 0.186187188 | 0.657228419  | 0.511034055 | 0.667402909 |
| ENSG00000148926 | 107.6386541 | 0.044403729  | 0.17540441  | 0.253150586  | 0.80015185  | 0.880924836 |
| ENSG00000148943 | 397.4040436 | -0.225577624 | 0.100261198 | -2.249899538 | 0.024455323 | 0.06802454  |
| ENSG00000148950 | 32.90678325 | -0.084500134 | 0.302167818 | -0.279646373 | 0.779748826 | 0.868262525 |
| ENSG00000148985 | 72.58298541 | 0.054878775  | 0.207047068 | 0.265054585  | 0.790967412 | 0.875273298 |
| ENSG00000149016 | 44.20803142 | 0.196669231  | 0.280805369 | 0.700375609  | 0.483692764 | 0.644164813 |
| ENSG00000149050 | 26.79463076 | -0.240275996 | 0.3450353   | -0.69638091  | 0.486190315 | 0.64655073  |
| ENSG00000149054 | 129.0315918 | -0.188531632 | 0.160737249 | -1.172918119 | 0.240828643 | 0.403352802 |
| ENSG00000149084 | 455.2578603 | 0.034801416  | 0.101654983 | 0.342348349  | 0.732088754 | 0.834847437 |
| ENSG00000149089 | 105.5517882 | 0.150943748  | 0.174212608 | 0.866434121  | 0.386252139 | 0.555102336 |

|                 |             |              |             |              |             |             |
|-----------------|-------------|--------------|-------------|--------------|-------------|-------------|
| ENSG00000149091 | 246.0485527 | 0.31965457   | 0.130798949 | 2.443861911  | 0.014530987 | 0.044286565 |
| ENSG00000149100 | 687.3628793 | 0.121922222  | 0.084168139 | 1.448555517  | 0.147461751 | 0.281707497 |
| ENSG00000149115 | 567.8610052 | -0.009388156 | 0.09412455  | -0.099741839 | 0.920549284 | 0.956523119 |
| ENSG00000149131 | 919.6970489 | -0.413193993 | 0.086344814 | -4.785394424 | 1.71E-06    | 1.44E-05    |
| ENSG00000149136 | 1868.599666 | 0.000706865  | 0.061373396 | 0.01151745   | 0.990810608 | 0.995236126 |
| ENSG00000149150 | 116.2232235 | 0.366672125  | 0.165823437 | 2.211220157  | 0.027020595 | 0.074029396 |
| ENSG00000149177 | 161.1245866 | 0.515589093  | 0.148159041 | 3.479970512  | 0.000501469 | 0.002428175 |
| ENSG00000149179 | 136.6291009 | -0.067327929 | 0.156062394 | -0.431416739 | 0.666165381 | 0.786348438 |
| ENSG00000149182 | 267.6767299 | 0.302238222  | 0.115175307 | 2.624158161  | 0.008686344 | 0.028667817 |
| ENSG00000149187 | 1012.712478 | 0.036055426  | 0.074023154 | 0.487083086  | 0.626199452 | 0.757381067 |
| ENSG00000149196 | 94.67091331 | 0.167022574  | 0.188484152 | 0.886135901  | 0.375544299 | 0.545529553 |
| ENSG00000149212 | 475.7448512 | -0.571516671 | 0.101331435 | -5.640072802 | 1.70E-08    | 2.02E-07    |
| ENSG00000149218 | 138.8387934 | -0.420983442 | 0.160917539 | -2.61614393  | 0.008892906 | 0.029224957 |
| ENSG00000149231 | 159.2049478 | 0.50699233   | 0.152408788 | 3.326529518  | 0.000879347 | 0.004005249 |
| ENSG00000149257 | 2830.409605 | 0.173861768  | 0.062424226 | 2.78516498   | 0.005350049 | 0.018934788 |
| ENSG00000149260 | 47.50533219 | -1.028756699 | 0.268469122 | -3.831936769 | 0.000127138 | 0.000716084 |
| ENSG00000149262 | 245.8486324 | 0.352088786  | 0.127090013 | 2.770389089  | 0.005598936 | 0.019681009 |
| ENSG00000149269 | 199.0504991 | -0.06494235  | 0.13313596  | -0.4877897   | 0.625698807 | 0.757101486 |
| ENSG00000149273 | 5508.327967 | 0.065204698  | 0.057632649 | 1.131384718  | 0.257893201 | 0.423550309 |
| ENSG00000149289 | 25.41283388 | -2.720145361 | 0.43738933  | -6.219048284 | 5.00E-10    | 7.24E-09    |
| ENSG00000149292 | 79.1770203  | -0.183317453 | 0.199204213 | -0.920248878 | 0.357442717 | 0.52874872  |
| ENSG00000149308 | 193.5011405 | -0.15883605  | 0.1408608   | -1.127610026 | 0.259484651 | 0.425616638 |
| ENSG00000149311 | 729.7419838 | -0.3043047   | 0.089952634 | -3.382943756 | 0.000717133 | 0.003343116 |
| ENSG00000149313 | 227.2117702 | 0.0260456    | 0.123758313 | 0.210455357  | 0.833312291 | 0.902386945 |
| ENSG00000149328 | 94.99684447 | 0.476773632  | 0.180980556 | 2.63439146   | 0.008428825 | 0.027990473 |
| ENSG00000149346 | 124.4162553 | -0.241693615 | 0.162784533 | -1.484745572 | 0.137611235 | 0.267472674 |
| ENSG00000149357 | 393.2213057 | 0.877438868  | 0.105044574 | 8.353014669  | 6.65E-17    | 1.83E-15    |
| ENSG00000149403 | 23.3470758  | 2.352008612  | 0.414084753 | 5.680017422  | 1.35E-08    | 1.63E-07    |
| ENSG00000149428 | 1500.51344  | 0.430569521  | 0.072108973 | 5.971094901  | 2.36E-09    | 3.13E-08    |
| ENSG00000149474 | 109.9834096 | -0.375278437 | 0.175663217 | -2.136351847 | 0.032650746 | 0.086292573 |
| ENSG00000149476 | 141.668649  | -0.072069789 | 0.152987949 | -0.471081476 | 0.637582553 | 0.76614774  |
| ENSG00000149480 | 1091.357773 | 0.10451118   | 0.069637035 | 1.500798817  | 0.133407605 | 0.261750019 |
| ENSG00000149483 | 280.8999598 | 0.317819454  | 0.11891274  | 2.67271156   | 0.007524091 | 0.02539426  |
| ENSG00000149485 | 2787.260451 | -0.11482248  | 0.061397191 | -1.870158511 | 0.061461809 | 0.143581247 |
| ENSG00000149489 | 23.13511131 | -0.326507108 | 0.365119352 | -0.894247612 | 0.371189423 | 0.54217406  |
| ENSG00000149499 | 215.3185623 | -0.184249891 | 0.130547534 | -1.411362478 | 0.158137761 | 0.296339531 |
| ENSG00000149503 | 1094.722648 | -0.18955573  | 0.070675958 | -2.682039774 | 0.007317476 | 0.024763869 |
| ENSG00000149531 | 13.13560204 | -0.592727476 | 0.500698937 | -1.183800148 | 0.236492184 | 0.397702107 |
| ENSG00000149532 | 959.4493256 | 0.016262043  | 0.074081761 | 0.219514796  | 0.826249056 | 0.898391554 |
| ENSG00000149541 | 77.19374836 | -0.186225603 | 0.212538716 | -0.876196143 | 0.380923413 | 0.550538001 |
| ENSG00000149547 | 730.0620554 | 0.039186949  | 0.094828482 | 0.413240288  | 0.679430573 | 0.796724373 |
| ENSG00000149548 | 35.49769654 | -0.277680756 | 0.314465428 | -0.883024749 | 0.3772229   | 0.546670343 |
| ENSG00000149554 | 158.5674785 | -0.44417851  | 0.146846275 | -3.02478568  | 0.002488094 | 0.009849697 |
| ENSG00000149557 | 16.07781053 | -1.219495035 | 0.4552679   | -2.678631712 | 0.007392365 | 0.024973678 |
| ENSG00000149564 | 8.688341821 | -0.598964243 | 0.598188935 | -1.001296092 | 0.316683682 | 0.488304685 |
| ENSG00000149577 | 623.6813289 | -0.428120038 | 0.090472976 | -4.732021172 | 2.22E-06    | 1.83E-05    |
| ENSG00000149582 | 165.6983431 | 0.594512969  | 0.149483172 | 3.97712305   | 6.98E-05    | 0.00041642  |
| ENSG00000149591 | 249.8596885 | -0.262467974 | 0.121524329 | -2.159797763 | 0.030788329 | 0.082283801 |
| ENSG00000149596 | 49.3979252  | -5.056476186 | 0.548336238 | -9.221488268 | 2.93E-20    | 1.00E-18    |
| ENSG00000149600 | 64.32139013 | 0.407828665  | 0.236464846 | 1.724690462  | 0.084583271 | 0.184408072 |

|                 |             |              |             |              |             |             |
|-----------------|-------------|--------------|-------------|--------------|-------------|-------------|
| ENSG00000149636 | 119.557073  | -0.08400225  | 0.163826301 | -0.512751917 | 0.608124868 | 0.744689219 |
| ENSG00000149639 | 2316.046233 | -0.103629324 | 0.063710456 | -1.626566985 | 0.103829096 | 0.215867235 |
| ENSG00000149646 | 19.82152622 | 0.417575817  | 0.383640453 | 1.088456165  | 0.276393778 | 0.444897936 |
| ENSG00000149657 | 500.3044796 | 0.176006223  | 0.094546283 | 1.861587968  | 0.062661191 | 0.145777036 |
| ENSG00000149658 | 573.6790347 | 0.04635908   | 0.087001638 | 0.532852958  | 0.594135372 | 0.734279392 |
| ENSG00000149679 | 129.3899456 | -0.431878141 | 0.161844047 | -2.668483323 | 0.007619456 | 0.025685265 |
| ENSG00000149716 | 71.04004366 | 0.422639909  | 0.212756935 | 1.986491812  | 0.046978741 | 0.116160953 |
| ENSG00000149743 | 100.3651605 | 0.150171646  | 0.176036246 | 0.853072305  | 0.393619209 | 0.561679097 |
| ENSG00000149761 | 95.43311449 | 0.519211398  | 0.185400775 | 2.80048127   | 0.005102647 | 0.018200117 |
| ENSG00000149781 | 37.94522048 | -0.198410331 | 0.278923628 | -0.711342857 | 0.4768718   | 0.63753861  |
| ENSG00000149782 | 580.2352814 | 0.115875429  | 0.086137668 | 1.345235262  | 0.178549272 | 0.324292944 |
| ENSG00000149792 | 484.8823217 | 0.228000866  | 0.095814148 | 2.379615865  | 0.017330694 | 0.051413781 |
| ENSG00000149806 | 965.410663  | 0.290296701  | 0.09742478  | 2.979700877  | 0.0028853   | 0.011168313 |
| ENSG00000149809 | 283.8505253 | -0.615274988 | 0.113268054 | -5.432025772 | 5.57E-08    | 6.13E-07    |
| ENSG00000149823 | 355.8601709 | -0.090255718 | 0.113485483 | -0.795306286 | 0.426435358 | 0.593670711 |
| ENSG00000149922 | 17.58596446 | -0.361302882 | 0.415942105 | -0.868637432 | 0.385045474 | 0.554120434 |
| ENSG00000149923 | 358.2903477 | 0.098192074  | 0.108124206 | 0.908141458  | 0.363803489 | 0.534834915 |
| ENSG00000149925 | 701.633579  | 0.383230075  | 0.087434839 | 4.383036342  | 1.17E-05    | 8.27E-05    |
| ENSG00000149926 | 90.2647982  | -0.820680384 | 0.190443589 | -4.309309592 | 1.64E-05    | 0.000112051 |
| ENSG00000149927 | 78.53900444 | 0.118164485  | 0.19956345  | 0.592114863  | 0.553773675 | 0.700924384 |
| ENSG00000149929 | 437.2505028 | 0.241702976  | 0.099742471 | 2.423270385  | 0.015381474 | 0.046525314 |
| ENSG00000149930 | 424.9090358 | 0.045892517  | 0.103363297 | 0.443992393  | 0.657048084 | 0.780116172 |
| ENSG00000149932 | 350.520981  | 0.214555987  | 0.1086989   | 1.973856108  | 0.048398107 | 0.118979385 |
| ENSG00000149948 | 3691.05738  | -1.668289743 | 0.059509312 | -28.03409543 | 6.24E-173   | 3.99E-170   |
| ENSG00000149968 | 11.85688291 | 2.666585044  | 0.609081477 | 4.378043243  | 1.20E-05    | 8.44E-05    |
| ENSG00000149970 | 12.5897364  | 4.34289494   | 0.824138444 | 5.269618193  | 1.37E-07    | 1.41E-06    |
| ENSG00000149972 | 19.76134132 | -1.118701579 | 0.411513619 | -2.718504388 | 0.006557779 | 0.022511514 |
| ENSG00000150048 | 9.590139404 | -3.012631296 | 0.753442799 | -3.998487075 | 6.37E-05    | 0.000383502 |
| ENSG00000150093 | 2731.985248 | -0.161766791 | 0.05622552  | -2.877106182 | 0.004013405 | 0.014843682 |
| ENSG00000150281 | 67.1741357  | -0.591704318 | 0.230915594 | -2.56242685  | 0.010394348 | 0.03335833  |
| ENSG00000150316 | 285.932674  | 0.207580657  | 0.112470075 | 1.845652332  | 0.064942703 | 0.150016468 |
| ENSG00000150347 | 2581.311992 | 0.243660204  | 0.059489399 | 4.095859237  | 4.21E-05    | 0.000263173 |
| ENSG00000150401 | 78.2978062  | -0.324644885 | 0.216337052 | -1.500643935 | 0.133447681 | 0.261770644 |
| ENSG00000150403 | 266.2495531 | -0.279721922 | 0.121505085 | -2.302141697 | 0.021327183 | 0.060866098 |
| ENSG00000150433 | 49.53410097 | 0.223603411  | 0.247916538 | 0.901930193  | 0.367093951 | 0.538376356 |
| ENSG00000150455 | 69.1602031  | -0.060517271 | 0.215925394 | -0.280269353 | 0.779270861 | 0.868088632 |
| ENSG00000150456 | 28.83462268 | 0.542418427  | 0.32411543  | 1.673534726  | 0.094222076 | 0.2002629   |
| ENSG00000150457 | 569.5940173 | -0.065830626 | 0.089478368 | -0.735715536 | 0.461903833 | 0.624920929 |
| ENSG00000150459 | 494.9495202 | 0.019736316  | 0.092377524 | 0.213648462  | 0.830821205 | 0.901344809 |
| ENSG00000150471 | 53.78297664 | -1.936957293 | 0.270490282 | -7.160912681 | 8.01E-13    | 1.61E-11    |
| ENSG00000150477 | 72.17241471 | -0.169107592 | 0.213787682 | -0.791007182 | 0.428939801 | 0.595858127 |
| ENSG00000150510 | 17.10618482 | -0.02223394  | 0.422620984 | -0.052609644 | 0.958042933 | 0.977492516 |
| ENSG00000150527 | 267.3250733 | -0.037341188 | 0.115544203 | -0.323176646 | 0.746561466 | 0.845517126 |
| ENSG00000150556 | 22.96296711 | -6.821737386 | 1.2137976   | -5.620160548 | 1.91E-08    | 2.25E-07    |
| ENSG00000150593 | 702.5971119 | 0.06074404   | 0.081235852 | 0.747749158  | 0.454611474 | 0.618431859 |
| ENSG00000150625 | 49.03255197 | 1.371485986  | 0.279512028 | 4.906715449  | 9.26E-07    | 8.26E-06    |
| ENSG00000150627 | 80.32233752 | -0.214366449 | 0.196016194 | -1.093616014 | 0.274123423 | 0.442344827 |
| ENSG00000150636 | 21.52566465 | -0.92574467  | 0.387948134 | -2.386258858 | 0.017020766 | 0.050644079 |
| ENSG00000150667 | 9.138962425 | -0.240505998 | 0.586351422 | -0.410173811 | 0.68167845  | 0.798493762 |
| ENSG00000150672 | 16.66728047 | -0.836605959 | 0.42907307  | -1.949798339 | 0.05120016  | 0.124065662 |

|                 |             |              |             |              |             |             |
|-----------------|-------------|--------------|-------------|--------------|-------------|-------------|
| ENSG00000150687 | 11.56839434 | 1.061435299  | 0.527322023 | 2.012878758  | 0.044127386 | 0.11057883  |
| ENSG00000150712 | 290.6179565 | -0.04977208  | 0.118384906 | -0.420425893 | 0.674174356 | 0.792545583 |
| ENSG00000150753 | 2014.120079 | 0.221048085  | 0.061755919 | 3.579382986  | 0.000344406 | 0.001738992 |
| ENSG00000150756 | 88.46703663 | 0.317163727  | 0.190834817 | 1.661980414  | 0.096516702 | 0.203942456 |
| ENSG00000150760 | 1391.079006 | -0.071664122 | 0.068194093 | -1.050884597 | 0.293311596 | 0.463928384 |
| ENSG00000150764 | 420.5825673 | 0.161497831  | 0.097147574 | 1.662396947  | 0.096433211 | 0.203852116 |
| ENSG00000150768 | 808.1905481 | -0.12960563  | 0.077391068 | -1.674684595 | 0.093996132 | 0.199903658 |
| ENSG00000150776 | 264.4315784 | -0.070027108 | 0.115849332 | -0.604467082 | 0.545533148 | 0.694121751 |
| ENSG00000150779 | 179.5896528 | 0.188037223  | 0.145146751 | 1.295497291  | 0.195148735 | 0.346334948 |
| ENSG00000150787 | 89.03781873 | 0.160676178  | 0.188957584 | 0.850329338  | 0.39514201  | 0.563217718 |
| ENSG00000150867 | 257.0204453 | -0.219511984 | 0.126483283 | -1.735501945 | 0.082651937 | 0.181096828 |
| ENSG00000150893 | 72.37166346 | -1.346420062 | 0.220218617 | -6.114015624 | 9.72E-10    | 1.35E-08    |
| ENSG00000150907 | 23.00477323 | -1.437244083 | 0.388238952 | -3.701957458 | 0.000213942 | 0.001137491 |
| ENSG00000150938 | 69.0106442  | -5.367075961 | 0.511357595 | -10.49573922 | 9.04E-26    | 4.19E-24    |
| ENSG00000150961 | 399.8381699 | 0.639377464  | 0.100229472 | 6.379136281  | 1.78E-10    | 2.73E-09    |
| ENSG00000150967 | 116.8340404 | 0.030165086  | 0.168152047 | 0.179391727  | 0.857630127 | 0.91843641  |
| ENSG00000150977 | 149.658455  | 0.198725014  | 0.146643224 | 1.355159887  | 0.175366622 | 0.31987728  |
| ENSG00000150990 | 386.889426  | 0.33494561   | 0.116106368 | 2.884816886  | 0.003916414 | 0.014527031 |
| ENSG00000150991 | 2602.184561 | 0.396674197  | 0.075016124 | 5.287852456  | 1.24E-07    | 1.28E-06    |
| ENSG00000150995 | 105.1746204 | -0.006926877 | 0.180724761 | -0.038328325 | 0.969425907 | 0.984067475 |
| ENSG00000151012 | 270.9927537 | 0.058465107  | 0.136747676 | 0.42754004   | 0.668986028 | 0.788491923 |
| ENSG00000151014 | 170.4435784 | -0.18521008  | 0.143578286 | -1.289958839 | 0.19706495  | 0.348416784 |
| ENSG00000151065 | 174.5715661 | -0.124875345 | 0.152031755 | -0.821376724 | 0.411431717 | 0.579793472 |
| ENSG00000151067 | 34.52636669 | -1.42565974  | 0.329550894 | -4.326068498 | 1.52E-05    | 0.000104625 |
| ENSG00000151092 | 174.3222267 | 0.180011045  | 0.149525158 | 1.203884668  | 0.228634159 | 0.387502899 |
| ENSG00000151093 | 97.78190672 | 0.160492447  | 0.212403191 | 0.755602807  | 0.449887373 | 0.614923414 |
| ENSG00000151116 | 150.9324062 | -0.076494435 | 0.148369566 | -0.515566886 | 0.606156943 | 0.743151644 |
| ENSG00000151131 | 204.3373705 | -0.041702466 | 0.1281517   | -0.325414848 | 0.744867119 | 0.844210781 |
| ENSG00000151135 | 310.5161543 | 0.205636098  | 0.112894728 | 1.821485395  | 0.068533105 | 0.156432324 |
| ENSG00000151136 | 8.644226469 | -2.398436994 | 0.749907339 | -3.198311137 | 0.00138235  | 0.00596006  |
| ENSG00000151148 | 318.8688954 | -0.089523703 | 0.109619142 | -0.816679475 | 0.414111624 | 0.582431606 |
| ENSG00000151150 | 272.6639039 | -1.933706538 | 0.13131943  | -14.72521269 | 4.44E-49    | 4.62E-47    |
| ENSG00000151151 | 88.93813845 | -0.123270501 | 0.200911573 | -0.613556    | 0.539508767 | 0.689580557 |
| ENSG00000151176 | 2156.258    | 0.51409484   | 0.068510422 | 7.503892445  | 6.20E-14    | 1.37E-12    |
| ENSG00000151208 | 762.6123597 | 0.157179451  | 0.078896567 | 1.992221675  | 0.046346741 | 0.114861092 |
| ENSG00000151224 | 9.028087986 | 0.274219218  | 0.58102402  | 0.471958489  | 0.636956419 | 0.765710468 |
| ENSG00000151229 | 114.4029454 | -0.371520529 | 0.167466132 | -2.218481577 | 0.026522014 | 0.072864216 |
| ENSG00000151233 | 354.759307  | -0.169934507 | 0.102420339 | -1.659187116 | 0.097078093 | 0.204783897 |
| ENSG00000151239 | 269.646311  | 0.508446192  | 0.117979327 | 4.309621077  | 1.64E-05    | 0.000111948 |
| ENSG00000151240 | 287.923319  | -0.106484819 | 0.116947495 | -0.910535269 | 0.36254029  | 0.533424475 |
| ENSG00000151247 | 400.9222043 | 0.029209515  | 0.104382135 | 0.279832513  | 0.779606006 | 0.868244866 |
| ENSG00000151276 | 478.235265  | -0.290229049 | 0.091776717 | -3.162338525 | 0.001565075 | 0.00662187  |
| ENSG00000151287 | 63.12020191 | 0.004438699  | 0.239221494 | 0.018554767  | 0.985196287 | 0.992402456 |
| ENSG00000151292 | 283.9830123 | -0.014217653 | 0.112262866 | -0.126646093 | 0.899220514 | 0.945499634 |
| ENSG00000151304 | 98.02512909 | -0.142628627 | 0.183715363 | -0.776356558 | 0.437538487 | 0.603314879 |
| ENSG00000151320 | 47.07919439 | 0.376246786  | 0.255228062 | 1.474159162  | 0.140438742 | 0.271518409 |
| ENSG00000151327 | 250.2051667 | 0.151954924  | 0.122184788 | 1.243648467  | 0.21362897  | 0.369153173 |
| ENSG00000151332 | 89.80818704 | -0.019213171 | 0.184723476 | -0.104010447 | 0.917161058 | 0.955230368 |
| ENSG00000151338 | 398.3088243 | -0.266005279 | 0.105292668 | -2.526341903 | 0.011525725 | 0.0363988   |
| ENSG00000151348 | 275.4668506 | -0.051344185 | 0.11585839  | -0.443163284 | 0.657647634 | 0.780564116 |

|                 |             |              |             |              |             |             |
|-----------------|-------------|--------------|-------------|--------------|-------------|-------------|
| ENSG00000151353 | 169.8138256 | -0.358369865 | 0.141253685 | -2.537065598 | 0.011178601 | 0.035454008 |
| ENSG00000151366 | 20.15714608 | 0.180886285  | 0.418322673 | 0.432408514  | 0.665444531 | 0.786025079 |
| ENSG00000151376 | 39.44081251 | 1.38390941   | 0.292699923 | 4.728082584  | 2.27E-06    | 1.87E-05    |
| ENSG00000151413 | 73.98536306 | 0.296076166  | 0.210664845 | 1.405436992  | 0.159891373 | 0.298709153 |
| ENSG00000151414 | 202.9626522 | 0.212473848  | 0.138474654 | 1.534388005  | 0.124934227 | 0.249318239 |
| ENSG00000151422 | 254.2295524 | -0.251171745 | 0.120421185 | -2.085777056 | 0.036998823 | 0.09566031  |
| ENSG00000151445 | 112.1987844 | -0.148172107 | 0.17216207  | -0.860654771 | 0.38942821  | 0.557852139 |
| ENSG00000151458 | 368.9620391 | -0.280441123 | 0.110302825 | -2.542465471 | 0.011007348 | 0.034981948 |
| ENSG00000151461 | 864.5928709 | 0.133468362  | 0.077419667 | 1.723959375  | 0.084715177 | 0.184666992 |
| ENSG00000151465 | 662.1397208 | 0.162183868  | 0.084354129 | 1.922654779  | 0.05452342  | 0.130542096 |
| ENSG00000151466 | 231.8660132 | -0.496127698 | 0.130850785 | -3.791553086 | 0.000149708 | 0.000826631 |
| ENSG00000151468 | 67.47861053 | 0.678968214  | 0.234703707 | 2.892873838  | 0.003817346 | 0.014204572 |
| ENSG00000151470 | 44.90003184 | -0.487716594 | 0.264094231 | -1.846752169 | 0.064783067 | 0.149721576 |
| ENSG00000151474 | 7.951975029 | -0.991064679 | 0.626121846 | -1.582862323 | 0.113452848 | 0.231402956 |
| ENSG00000151491 | 70.72884144 | 1.421575039  | 0.218288464 | 6.512369054  | 7.40E-11    | 1.19E-09    |
| ENSG00000151498 | 89.51832149 | -0.100559153 | 0.188791787 | -0.532645802 | 0.59427879  | 0.734327425 |
| ENSG00000151500 | 118.6411234 | -0.038857074 | 0.162865592 | -0.238583692 | 0.811428412 | 0.88902074  |
| ENSG00000151502 | 221.0005    | 0.226467675  | 0.126654099 | 1.788080113  | 0.073763084 | 0.16528155  |
| ENSG00000151503 | 698.1503961 | -0.171472209 | 0.084246142 | -2.035371635 | 0.041813493 | 0.105963222 |
| ENSG00000151532 | 152.9084018 | -0.482169139 | 0.14647046  | -3.291920704 | 0.000995057 | 0.004472819 |
| ENSG00000151552 | 144.2224423 | -0.010078526 | 0.153111755 | -0.065824639 | 0.94751744  | 0.970914655 |
| ENSG00000151553 | 173.7002865 | 0.420630862  | 0.13803252  | 3.047331615  | 0.002308828 | 0.009232028 |
| ENSG00000151575 | 64.59033909 | -0.8953924   | 0.225990857 | -3.962073568 | 7.43E-05    | 0.000440572 |
| ENSG00000151576 | 230.0027246 | 0.034059792  | 0.125321244 | 0.271779878  | 0.785791278 | 0.87181187  |
| ENSG00000151611 | 77.78429933 | 0.431892826  | 0.205193986 | 2.104802554  | 0.035308499 | 0.092052428 |
| ENSG00000151612 | 581.4407106 | -0.169562609 | 0.094662811 | -1.791227285 | 0.073256829 | 0.164435711 |
| ENSG00000151617 | 17.44990052 | -0.256590945 | 0.411321273 | -0.623821235 | 0.532744993 | 0.684234151 |
| ENSG00000151640 | 221.4016217 | 0.561410498  | 0.126377527 | 4.44232857   | 8.90E-06    | 6.45E-05    |
| ENSG00000151651 | 45.69215212 | -0.07776725  | 0.260621126 | -0.298391967 | 0.765404019 | 0.858571124 |
| ENSG00000151657 | 54.80853908 | 0.041843284  | 0.233513988 | 0.179189626  | 0.857788809 | 0.918536317 |
| ENSG00000151665 | 38.16391678 | -0.065115199 | 0.291733679 | -0.223200829 | 0.823379207 | 0.896520248 |
| ENSG00000151687 | 19.67005733 | -0.762393993 | 0.406120978 | -1.877258339 | 0.060482695 | 0.141765463 |
| ENSG00000151689 | 104.9229298 | -0.549703527 | 0.177334373 | -3.09981375  | 0.001936424 | 0.007960475 |
| ENSG00000151693 | 137.4562917 | -0.315917318 | 0.16025759  | -1.971309552 | 0.048688479 | 0.119495927 |
| ENSG00000151694 | 410.1997154 | 0.037371741  | 0.10206471  | 0.366157321  | 0.714247687 | 0.821841191 |
| ENSG00000151718 | 678.1349819 | -0.048236938 | 0.084171213 | -0.573081185 | 0.566589726 | 0.712140827 |
| ENSG00000151725 | 123.9765921 | -0.398424554 | 0.1682366   | -2.368239448 | 0.017872964 | 0.052666568 |
| ENSG00000151726 | 442.5420945 | 0.897873868  | 0.098745522 | 9.092805947  | 9.65E-20    | 3.21E-18    |
| ENSG00000151729 | 443.2087947 | -0.817573947 | 0.096530823 | -8.4695636   | 2.46E-17    | 6.93E-16    |
| ENSG00000151743 | 53.29054788 | 0.27221441   | 0.24741927  | 1.100215072  | 0.271238425 | 0.438848901 |
| ENSG00000151746 | 331.4618916 | 0.077006023  | 0.115878396 | 0.664541674  | 0.506343686 | 0.66386128  |
| ENSG00000151748 | 274.1830707 | 0.407994678  | 0.113168876 | 3.605184505  | 0.000311931 | 0.001592187 |
| ENSG00000151773 | 31.15788407 | 0.10863229   | 0.308676014 | 0.351929807  | 0.724890905 | 0.829602619 |
| ENSG00000151779 | 712.7642242 | 0.228635448  | 0.087414251 | 2.615539762  | 0.008908655 | 0.029265639 |
| ENSG00000151789 | 35.98026077 | -1.786789705 | 0.325237388 | -5.493801677 | 3.93E-08    | 4.43E-07    |
| ENSG00000151806 | 764.3119001 | 0.593944778  | 0.093861706 | 6.327871121  | 2.49E-10    | 3.73E-09    |
| ENSG00000151834 | 10.66928141 | -1.094451803 | 0.555202089 | -1.971267444 | 0.048693293 | 0.119495927 |
| ENSG00000151835 | 1465.094284 | -0.027636905 | 0.071042345 | -0.389020176 | 0.697261221 | 0.810027539 |
| ENSG00000151849 | 432.7580658 | -0.195678832 | 0.098021104 | -1.996292876 | 0.045902053 | 0.113991285 |
| ENSG00000151876 | 18.03167693 | -0.417479496 | 0.411227763 | -1.015202603 | 0.31000926  | 0.481341889 |

|                 |             |              |             |              |             |             |
|-----------------|-------------|--------------|-------------|--------------|-------------|-------------|
| ENSG00000151881 | 53.77022078 | -0.028351121 | 0.243449189 | -0.116456008 | 0.907291149 | 0.950460047 |
| ENSG00000151883 | 199.7091738 | -0.001252147 | 0.132465288 | -0.009452644 | 0.992457994 | 0.996207876 |
| ENSG00000151892 | 82.12375927 | 1.468863174  | 0.203153008 | 7.23032944   | 4.82E-13    | 9.88E-12    |
| ENSG00000151893 | 446.8173723 | 0.043299442  | 0.097855145 | 0.442485084  | 0.658138222 | 0.781080399 |
| ENSG00000151914 | 2719.523025 | 0.34717623   | 0.064883424 | 5.350769242  | 8.76E-08    | 9.31E-07    |
| ENSG00000151923 | 607.5189128 | 0.201255907  | 0.085509022 | 2.353621904  | 0.018591511 | 0.054376477 |
| ENSG00000151929 | 560.4397857 | 0.556984088  | 0.09540834  | 5.837897254  | 5.29E-09    | 6.74E-08    |
| ENSG00000151948 | 85.89543296 | 0.415485134  | 0.1903523   | 2.182716652  | 0.029056683 | 0.078492159 |
| ENSG00000151967 | 22.25074896 | -6.784478548 | 1.215116946 | -5.58339555  | 2.36E-08    | 2.75E-07    |
| ENSG00000152056 | 132.6855537 | 0.143466942  | 0.164464548 | 0.872327465  | 0.383029758 | 0.552444955 |
| ENSG00000152061 | 300.6611348 | -0.280012359 | 0.110431554 | -2.535619121 | 0.011224874 | 0.035568647 |
| ENSG00000152076 | 31.87741773 | 0.450226793  | 0.325050336 | 1.385098685  | 0.166022294 | 0.307748108 |
| ENSG00000152078 | 78.20132192 | -0.381747341 | 0.211857728 | -1.801904253 | 0.071560471 | 0.161765358 |
| ENSG00000152082 | 1102.373087 | 0.43802388   | 0.078126374 | 5.606607041  | 2.06E-08    | 2.42E-07    |
| ENSG00000152102 | 1126.796291 | 0.007010678  | 0.077811827 | 0.090097847  | 0.92820946  | 0.960837015 |
| ENSG00000152104 | 890.176805  | 0.301349142  | 0.083539445 | 3.607267718  | 0.000309438 | 0.001581186 |
| ENSG00000152117 | 69.30167861 | 0.140771835  | 0.215463511 | 0.6533442    | 0.513534403 | 0.669454701 |
| ENSG00000152127 | 524.2285324 | -0.070376609 | 0.090519399 | -0.77747544  | 0.436878319 | 0.602891221 |
| ENSG00000152133 | 327.3399046 | 0.520885177  | 0.106357248 | 4.897505208  | 9.71E-07    | 8.62E-06    |
| ENSG00000152147 | 177.9146378 | 0.131463761  | 0.137617247 | 0.955285503  | 0.339433337 | 0.511206184 |
| ENSG00000152193 | 195.4772887 | -0.037628792 | 0.141041301 | -0.266792719 | 0.789628761 | 0.874348005 |
| ENSG00000152207 | 488.7625398 | 2.677271054  | 0.111996411 | 23.90497186  | 2.72E-126   | 1.01E-123   |
| ENSG00000152219 | 148.5419626 | -0.406050068 | 0.152850045 | -2.656525665 | 0.007895044 | 0.026455555 |
| ENSG00000152223 | 360.4141217 | 0.30931362   | 0.10290549  | 3.005802887  | 0.002648806 | 0.010390333 |
| ENSG00000152229 | 88.3477028  | -0.41285419  | 0.190878275 | -2.162918696 | 0.030547434 | 0.081780026 |
| ENSG00000152234 | 1817.96185  | 0.057933015  | 0.069999086 | 0.827625318  | 0.407882725 | 0.576353349 |
| ENSG00000152240 | 139.5147547 | 0.349407517  | 0.153640866 | 2.274183464  | 0.022954958 | 0.064554213 |
| ENSG00000152242 | 251.2177182 | 0.054689044  | 0.119989164 | 0.455783187  | 0.648545895 | 0.773815017 |
| ENSG00000152253 | 109.3432014 | -0.840346697 | 0.175639301 | -4.784502625 | 1.71E-06    | 1.45E-05    |
| ENSG00000152256 | 269.5155353 | 0.407815021  | 0.115454109 | 3.532269446  | 0.000412009 | 0.002034269 |
| ENSG00000152270 | 361.892165  | 0.144642033  | 0.108553207 | 1.332452876  | 0.182711417 | 0.329805612 |
| ENSG00000152284 | 84.62103844 | -4.448812664 | 0.355937621 | -12.49885485 | 7.57E-36    | 5.07E-34    |
| ENSG00000152291 | 708.3465104 | 0.213142387  | 0.085465263 | 2.493906637  | 0.012634577 | 0.039369544 |
| ENSG00000152332 | 775.3111236 | 0.236124672  | 0.077447157 | 3.048848806  | 0.002297201 | 0.009196004 |
| ENSG00000152348 | 81.2335843  | -0.191560454 | 0.204844658 | -0.935149867 | 0.34971107  | 0.521762231 |
| ENSG00000152359 | 63.06240758 | -0.411169105 | 0.230240343 | -1.785825631 | 0.074127495 | 0.16596572  |
| ENSG00000152380 | 32.18049655 | 0.509655019  | 0.306144659 | 1.664752284  | 0.095962187 | 0.203174872 |
| ENSG00000152382 | 127.1392089 | -0.196136422 | 0.159609628 | -1.228850824 | 0.219127742 | 0.376294302 |
| ENSG00000152404 | 208.2104664 | -0.18170394  | 0.131707072 | -1.379606559 | 0.167707817 | 0.309972593 |
| ENSG00000152409 | 348.4680864 | 0.2310385    | 0.10698616  | 2.159517637  | 0.030810031 | 0.082326136 |
| ENSG00000152413 | 258.9348087 | -0.433832372 | 0.136208539 | -3.185060023 | 0.00144724  | 0.006196092 |
| ENSG00000152422 | 72.74665837 | 0.161512443  | 0.205322412 | 0.786628416  | 0.43149942  | 0.597805177 |
| ENSG00000152439 | 29.90153545 | 0.365107634  | 0.322580266 | 1.131834996  | 0.257703812 | 0.423403097 |
| ENSG00000152443 | 67.41062715 | -0.191724094 | 0.248451169 | -0.771677163 | 0.44030566  | 0.605657423 |
| ENSG00000152454 | 77.46478706 | -0.020540259 | 0.198735477 | -0.103354767 | 0.917681411 | 0.955355281 |
| ENSG00000152455 | 112.0567615 | -0.086782951 | 0.186469502 | -0.465400239 | 0.641644863 | 0.768715172 |
| ENSG00000152457 | 272.8509281 | -0.075996163 | 0.121245074 | -0.626797946 | 0.53079169  | 0.682911785 |
| ENSG00000152464 | 226.8717901 | 0.06301145   | 0.146810555 | 0.429202447  | 0.667775902 | 0.787594299 |
| ENSG00000152465 | 73.3042428  | -0.516495554 | 0.215389724 | -2.397958195 | 0.016486747 | 0.04930642  |
| ENSG00000152475 | 18.62988475 | -0.877829776 | 0.420783268 | -2.086180328 | 0.036962292 | 0.095583452 |

|                 |             |              |             |              |             |             |
|-----------------|-------------|--------------|-------------|--------------|-------------|-------------|
| ENSG00000152484 | 287.6149336 | -0.070731756 | 0.11438063  | -0.618389283 | 0.53631876  | 0.687065174 |
| ENSG00000152492 | 483.6587743 | -0.78165221  | 0.099088786 | -7.888402343 | 3.06E-15    | 7.53E-14    |
| ENSG00000152495 | 17.44987354 | 1.63094773   | 0.43988359  | 3.707680323  | 0.000209166 | 0.001114629 |
| ENSG00000152518 | 1053.405404 | 0.193645639  | 0.086950074 | 2.227089994  | 0.02594126  | 0.071548572 |
| ENSG00000152520 | 213.7064    | -0.196314727 | 0.127503973 | -1.539675367 | 0.123639504 | 0.247613931 |
| ENSG00000152527 | 23.72055132 | -2.875853086 | 0.466942237 | -6.158905442 | 7.32E-10    | 1.04E-08    |
| ENSG00000152556 | 533.987955  | 0.169326343  | 0.08829499  | 1.917734446  | 0.055144692 | 0.131782491 |
| ENSG00000152558 | 896.7282236 | 0.244233358  | 0.08596777  | 2.840987462  | 0.004497408 | 0.016360121 |
| ENSG00000152578 | 43.33159246 | -1.715617093 | 0.29799216  | -5.757255797 | 8.55E-09    | 1.06E-07    |
| ENSG00000152580 | 20.98501885 | -2.804244554 | 0.489516104 | -5.728605313 | 1.01E-08    | 1.24E-07    |
| ENSG00000152582 | 23.49295609 | -2.784776701 | 0.458237333 | -6.077149328 | 1.22E-09    | 1.69E-08    |
| ENSG00000152601 | 862.8900233 | 0.543156302  | 0.075357407 | 7.207736125  | 5.69E-13    | 1.16E-11    |
| ENSG00000152620 | 315.6770877 | -0.58269766  | 0.108960142 | -5.347805616 | 8.90E-08    | 9.44E-07    |
| ENSG00000152642 | 187.0214205 | 0.313793779  | 0.1371911   | 2.287275042  | 0.022179774 | 0.062675375 |
| ENSG00000152661 | 1049.197621 | -5.191579219 | 0.13557128  | -38.29409298 | 0           | 0           |
| ENSG00000152669 | 62.11081584 | 1.661659958  | 0.237279061 | 7.002977635  | 2.51E-12    | 4.80E-11    |
| ENSG00000152683 | 277.17297   | -0.237364047 | 0.125417305 | -1.89259406  | 0.058411874 | 0.137704241 |
| ENSG00000152684 | 154.1019376 | 0.437154933  | 0.145704849 | 3.000277181  | 0.00269734  | 0.01053365  |
| ENSG00000152700 | 166.2846989 | -0.065428597 | 0.146248987 | -0.447378119 | 0.654602072 | 0.778462183 |
| ENSG00000152749 | 203.7638569 | -0.124377589 | 0.128798121 | -0.965678595 | 0.334205033 | 0.505990311 |
| ENSG00000152763 | 14.75154547 | -1.325911053 | 0.479433357 | -2.765579474 | 0.005682176 | 0.019909584 |
| ENSG00000152767 | 676.5908682 | -0.40159982  | 0.085638085 | -4.689500233 | 2.74E-06    | 2.22E-05    |
| ENSG00000152778 | 116.3447204 | 0.297984931  | 0.167643105 | 1.777495898  | 0.075486685 | 0.168338064 |
| ENSG00000152782 | 114.4559387 | -0.22802481  | 0.168261989 | -1.35517719  | 0.17536111  | 0.31987728  |
| ENSG00000152795 | 2568.740612 | 0.257260143  | 0.06022574  | 4.27159784   | 1.94E-05    | 0.000130628 |
| ENSG00000152804 | 87.97201543 | 0.58685397   | 0.197296256 | 2.974481025  | 0.002934846 | 0.011319545 |
| ENSG00000152818 | 740.8795496 | -1.013188747 | 0.093181408 | -10.873293   | 1.55E-27    | 7.67E-26    |
| ENSG00000152894 | 55.43794226 | 0.361248493  | 0.239507179 | 1.508299228  | 0.131477961 | 0.258882943 |
| ENSG00000152904 | 77.61107355 | 0.009890196  | 0.217375657 | 0.045498177  | 0.963710228 | 0.981000042 |
| ENSG00000152926 | 20.87237852 | -1.170391832 | 0.414634181 | -2.822709477 | 0.00476197  | 0.017178068 |
| ENSG00000152942 | 234.2519948 | 0.093242672  | 0.123546443 | 0.754717574  | 0.45041846  | 0.615349942 |
| ENSG00000152944 | 130.4552521 | 0.111448084  | 0.167293681 | 0.666182268  | 0.505294605 | 0.662868093 |
| ENSG00000152952 | 242.5592504 | -0.262586521 | 0.1233869   | -2.128155578 | 0.033324187 | 0.087791607 |
| ENSG00000152977 | 33.58267305 | -0.053871571 | 0.305346945 | -0.176427411 | 0.859958171 | 0.920195816 |
| ENSG00000152990 | 538.2312073 | -0.144656425 | 0.088430736 | -1.635816147 | 0.101878072 | 0.212800189 |
| ENSG00000153006 | 350.3849158 | -0.065763538 | 0.102754898 | -0.640003929 | 0.522170045 | 0.676154371 |
| ENSG00000153012 | 127.1535826 | -2.718403565 | 0.19966126  | -13.61507769 | 3.26E-42    | 2.72E-40    |
| ENSG00000153015 | 653.9760064 | -0.030786777 | 0.086984487 | -0.353934111 | 0.723388263 | 0.828557969 |
| ENSG00000153029 | 99.85365173 | -0.730368571 | 0.180450683 | -4.047469143 | 5.18E-05    | 0.000317172 |
| ENSG00000153037 | 193.1861907 | -0.039559137 | 0.131107881 | -0.301729663 | 0.762858153 | 0.856873889 |
| ENSG00000153044 | 55.60322834 | -0.177046648 | 0.243697319 | -0.726502239 | 0.467530936 | 0.629756504 |
| ENSG00000153046 | 422.7511986 | -0.070382866 | 0.106606124 | -0.660214099 | 0.509116446 | 0.665756722 |
| ENSG00000153048 | 193.2224985 | 0.288460924  | 0.136135078 | 2.118931634  | 0.034096245 | 0.089523356 |
| ENSG00000153066 | 157.8269637 | 0.031831028  | 0.145683848 | 0.218493875  | 0.82704433  | 0.898668717 |
| ENSG00000153071 | 8.792110627 | -5.408121454 | 1.276524102 | -4.236599563 | 2.27E-05    | 0.000150861 |
| ENSG00000153094 | 101.1496481 | -0.852062654 | 0.181843897 | -4.685681877 | 2.79E-06    | 2.26E-05    |
| ENSG00000153107 | 347.5270647 | 0.068300148  | 0.103361778 | 0.660787281  | 0.508748741 | 0.665497779 |
| ENSG00000153113 | 502.0885284 | -0.406156431 | 0.098499212 | -4.123448542 | 3.73E-05    | 0.000236381 |
| ENSG00000153130 | 137.2992015 | -0.193410473 | 0.15292868  | -1.264710276 | 0.205975205 | 0.359509655 |
| ENSG00000153132 | 69.23771748 | -0.458391812 | 0.21747438  | -2.107796841 | 0.035048566 | 0.091544665 |

|                 |             |              |             |              |             |             |
|-----------------|-------------|--------------|-------------|--------------|-------------|-------------|
| ENSG00000153140 | 189.1297361 | -0.005789429 | 0.13560674  | -0.04269278  | 0.965946435 | 0.982381232 |
| ENSG00000153147 | 1435.961008 | -0.878810552 | 0.06970632  | -12.60732953 | 1.92E-36    | 1.31E-34    |
| ENSG00000153157 | 9.580793476 | -0.711713111 | 0.580614456 | -1.225792956 | 0.220276598 | 0.377897579 |
| ENSG00000153179 | 288.2279619 | -0.393736318 | 0.122252038 | -3.220693301 | 0.001278809 | 0.005559713 |
| ENSG00000153187 | 10902.7186  | 0.110070175  | 0.050510001 | 2.179175857  | 0.029318607 | 0.078971902 |
| ENSG00000153201 | 963.1006137 | -0.038348901 | 0.092786738 | -0.413301528 | 0.67938571  | 0.796724373 |
| ENSG00000153207 | 1255.674134 | 0.140240345  | 0.067504183 | 2.077505989  | 0.037754883 | 0.097221419 |
| ENSG00000153208 | 284.2624848 | -0.46859208  | 0.114190396 | -4.103603254 | 4.07E-05    | 0.000255424 |
| ENSG00000153214 | 255.8560662 | -0.391879447 | 0.120563272 | -3.250404879 | 0.001152408 | 0.005084132 |
| ENSG00000153233 | 6.491075903 | -5.978368539 | 1.300823952 | -4.595832151 | 4.31E-06    | 3.34E-05    |
| ENSG00000153234 | 93.95445533 | -0.104976484 | 0.184620199 | -0.568607792 | 0.569622336 | 0.714810407 |
| ENSG00000153250 | 644.8154937 | 1.255867517  | 0.084297652 | 14.89801297  | 3.40E-50    | 3.56E-48    |
| ENSG00000153310 | 365.6518568 | -0.200851587 | 0.103169414 | -1.946813303 | 0.051557121 | 0.12477996  |
| ENSG00000153317 | 2493.389246 | 0.195004744  | 0.067691559 | 2.880783767  | 0.003966877 | 0.014710327 |
| ENSG00000153339 | 290.1593015 | 0.048499791  | 0.113163243 | 0.428582547  | 0.668227049 | 0.78799407  |
| ENSG00000153363 | 115.8997561 | -0.468300375 | 0.171365245 | -2.732761684 | 0.006280576 | 0.021676474 |
| ENSG00000153391 | 16.27340842 | 0.788023849  | 0.490710786 | 1.605882469  | 0.108299736 | 0.223226176 |
| ENSG00000153395 | 827.2183754 | -0.155299342 | 0.078952479 | -1.966997667 | 0.04918348  | 0.120320505 |
| ENSG00000153406 | 454.3141733 | -0.062183971 | 0.108298437 | -0.574190848 | 0.565838662 | 0.711478939 |
| ENSG00000153443 | 360.2963454 | -0.086610253 | 0.105539739 | -0.820641149 | 0.411850702 | 0.580267483 |
| ENSG00000153485 | 16.28359987 | -0.699759369 | 0.454198043 | -1.540648136 | 0.123402446 | 0.247209663 |
| ENSG00000153487 | 273.117904  | -0.203677869 | 0.122415322 | -1.663826595 | 0.096147088 | 0.203461606 |
| ENSG00000153531 | 44.22164912 | -1.102991048 | 0.272381709 | -4.049431416 | 5.13E-05    | 0.000314799 |
| ENSG00000153551 | 346.0579323 | 0.215914223  | 0.102970659 | 2.096851915  | 0.036006686 | 0.093629382 |
| ENSG00000153558 | 35.8397655  | -0.298869145 | 0.311502445 | -0.959443978 | 0.337335129 | 0.509302081 |
| ENSG00000153560 | 1519.525932 | 0.101990692  | 0.072610592 | 1.404625532  | 0.16013266  | 0.299120143 |
| ENSG00000153561 | 514.7350736 | -0.183441824 | 0.094916637 | -1.932662479 | 0.05327779  | 0.128105635 |
| ENSG00000153574 | 228.134717  | -0.123441046 | 0.130960126 | -0.942584963 | 0.345893234 | 0.517715745 |
| ENSG00000153707 | 511.9889262 | -0.998208776 | 0.097250906 | -10.26426198 | 1.02E-24    | 4.47E-23    |
| ENSG00000153714 | 287.058316  | 0.233843741  | 0.113264756 | 2.064576383  | 0.0389631   | 0.099747524 |
| ENSG00000153721 | 164.2750595 | -0.280732923 | 0.142280515 | -1.973094646 | 0.04848478  | 0.119099371 |
| ENSG00000153767 | 249.5017579 | -0.178539054 | 0.118016543 | -1.512830732 | 0.13032266  | 0.257112698 |
| ENSG00000153774 | 479.4296073 | -0.127991048 | 0.100183647 | -1.277564277 | 0.201403103 | 0.353805345 |
| ENSG00000153786 | 386.321217  | -0.035783896 | 0.101637666 | -0.352073175 | 0.724783385 | 0.829602619 |
| ENSG00000153790 | 13.13884985 | 0.418000726  | 0.475559363 | 0.878966452  | 0.379419466 | 0.548944818 |
| ENSG00000153814 | 29.14284259 | -1.361358274 | 0.350332984 | -3.885898095 | 0.000101952 | 0.000585975 |
| ENSG00000153815 | 493.9340707 | 0.082527654  | 0.090316774 | 0.913757773  | 0.360844139 | 0.532058728 |
| ENSG00000153827 | 1376.076067 | -0.071592483 | 0.07413484  | -0.965706304 | 0.334191164 | 0.505990311 |
| ENSG00000153832 | 29.14707394 | -0.771252554 | 0.340167571 | -2.267272429 | 0.023373589 | 0.065547774 |
| ENSG00000153879 | 323.988413  | -0.359155918 | 0.111784197 | -3.212939983 | 0.001313837 | 0.005694376 |
| ENSG00000153885 | 290.2583482 | -0.446696617 | 0.113709792 | -3.928391813 | 8.55E-05    | 0.000500924 |
| ENSG00000153896 | 16.69266277 | 0.264880015  | 0.417706621 | 0.634129318  | 0.525996431 | 0.679230728 |
| ENSG00000153898 | 100.3608989 | -0.119517536 | 0.18974678  | -0.629879129 | 0.528773669 | 0.681438874 |
| ENSG00000153902 | 18.59682087 | -0.805516231 | 0.432898452 | -1.86075101  | 0.062779347 | 0.145931074 |
| ENSG00000153904 | 112.2366106 | 0.498681679  | 0.170726353 | 2.920941429  | 0.003489754 | 0.013166956 |
| ENSG00000153914 | 1735.214984 | 0.060357588  | 0.075603781 | 0.798340868  | 0.424672708 | 0.591862043 |
| ENSG00000153922 | 1078.423022 | -0.092897611 | 0.072430351 | -1.282578506 | 0.199639784 | 0.351641386 |
| ENSG00000153933 | 269.1571649 | -0.198358859 | 0.116619521 | -1.700906137 | 0.088960614 | 0.191549229 |
| ENSG00000153936 | 310.4481682 | -0.343541335 | 0.111741178 | -3.0744381   | 0.002108995 | 0.008527648 |
| ENSG00000153944 | 727.3475504 | 0.087344477  | 0.083315765 | 1.048354748  | 0.294475194 | 0.464722284 |



|                 |             |              |             |              |             |             |
|-----------------|-------------|--------------|-------------|--------------|-------------|-------------|
| ENSG00000153956 | 1025.77334  | -0.079609528 | 0.076489348 | -1.040792343 | 0.297971934 | 0.468661042 |
| ENSG00000153975 | 62.92542153 | -0.550982276 | 0.224663747 | -2.452475239 | 0.014187714 | 0.043381546 |
| ENSG00000153982 | 73.34471112 | -0.018018624 | 0.20511624  | -0.087845914 | 0.929999145 | 0.962051549 |
| ENSG00000153989 | 72.31332921 | 0.158381024  | 0.233262815 | 0.67898102   | 0.497149888 | 0.655478175 |
| ENSG00000153993 | 36.87379583 | -6.67623033  | 1.022936113 | -6.526536941 | 6.73E-11    | 1.10E-09    |
| ENSG00000154001 | 281.0907474 | -0.174584314 | 0.113281585 | -1.541153524 | 0.123279426 | 0.247068925 |
| ENSG00000154027 | 9.867035778 | 1.309533822  | 0.571866632 | 2.289928714  | 0.022025449 | 0.062427661 |
| ENSG00000154040 | 129.2207205 | -0.444128894 | 0.159184039 | -2.79003408  | 0.005270249 | 0.01871838  |
| ENSG00000154059 | 149.2429849 | 0.081753253  | 0.146800348 | 0.556900948  | 0.577595107 | 0.721236186 |
| ENSG00000154079 | 35.09178103 | 0.188681793  | 0.304011252 | 0.620640818  | 0.534835976 | 0.685853657 |
| ENSG00000154096 | 461.2375237 | 0.375941839  | 0.092785793 | 4.051717691  | 5.08E-05    | 0.000312283 |
| ENSG00000154102 | 23.04028638 | 0.111264643  | 0.369686149 | 0.300970549  | 0.763436953 | 0.857280464 |
| ENSG00000154114 | 103.9984885 | -0.077063492 | 0.180517714 | -0.426902658 | 0.66945023  | 0.788840481 |
| ENSG00000154122 | 70.08481213 | 3.902398136  | 0.319225189 | 12.2245934   | 2.30E-34    | 1.45E-32    |
| ENSG00000154124 | 236.9508032 | 0.111420204  | 0.122430334 | 0.91007025   | 0.362785463 | 0.533729304 |
| ENSG00000154127 | 69.63871954 | 0.738729566  | 0.222733578 | 3.316651105  | 0.000911033 | 0.004138836 |
| ENSG00000154134 | 60.6523935  | -0.163911014 | 0.228245088 | -0.718135997 | 0.472673437 | 0.633981332 |
| ENSG00000154144 | 195.1415708 | -0.263438375 | 0.131668833 | -2.000764872 | 0.045417735 | 0.11307744  |
| ENSG00000154146 | 368.6515208 | 0.754089288  | 0.109153307 | 6.90853356   | 4.90E-12    | 8.97E-11    |
| ENSG00000154174 | 346.7388804 | 0.276127655  | 0.102787255 | 2.68639973   | 0.007222662 | 0.024506458 |
| ENSG00000154188 | 17.30763997 | -0.801295905 | 0.423575553 | -1.891742568 | 0.058525289 | 0.137913895 |
| ENSG00000154217 | 175.9526395 | -0.179755704 | 0.143777214 | -1.25023777  | 0.211212703 | 0.366284549 |
| ENSG00000154222 | 186.7141179 | 0.369354878  | 0.142303253 | 2.595547688  | 0.00944403  | 0.030743982 |
| ENSG00000154229 | 335.7383557 | 0.301453281  | 0.107415813 | 2.806414361  | 0.005009623 | 0.017937846 |
| ENSG00000154237 | 118.1461317 | -3.103967217 | 0.223167595 | -13.90868245 | 5.61E-44    | 4.86E-42    |
| ENSG00000154240 | 235.9875479 | -0.363260699 | 0.128079126 | -2.836220928 | 0.004565086 | 0.016574246 |
| ENSG00000154262 | 13.27260348 | -2.901010152 | 0.622861862 | -4.657549817 | 3.20E-06    | 2.55E-05    |
| ENSG00000154263 | 23.54282172 | -2.437613114 | 0.435749567 | -5.594068928 | 2.22E-08    | 2.60E-07    |
| ENSG00000154265 | 113.1696655 | -1.021714646 | 0.184331762 | -5.54280302  | 2.98E-08    | 3.42E-07    |
| ENSG00000154277 | 258.3980099 | 1.39828758   | 0.127879982 | 10.93437422  | 7.89E-28    | 3.95E-26    |
| ENSG00000154305 | 1656.189047 | 0.373787169  | 0.06639635  | 5.629634318  | 1.81E-08    | 2.14E-07    |
| ENSG00000154309 | 96.52776868 | 0.000127887  | 0.197764745 | 0.000646661  | 0.999484039 | 0.999854605 |
| ENSG00000154310 | 96.17843423 | 0.714513843  | 0.180503132 | 3.958456754  | 7.54E-05    | 0.000446542 |
| ENSG00000154319 | 8.725252831 | -1.959265798 | 0.669820043 | -2.92506296  | 0.003443865 | 0.01301129  |
| ENSG00000154328 | 147.1255448 | 0.273353714  | 0.14984887  | 1.824196032  | 0.068122441 | 0.155824122 |
| ENSG00000154358 | 2096.23241  | 1.533665204  | 0.138842663 | 11.04606586  | 2.29E-28    | 1.17E-26    |
| ENSG00000154359 | 181.3544463 | -0.07770483  | 0.139322328 | -0.557734222 | 0.577025885 | 0.720935926 |
| ENSG00000154370 | 474.3567099 | 0.028693227  | 0.09876636  | 0.290516197  | 0.771421361 | 0.863328623 |
| ENSG00000154380 | 2044.426561 | -0.085715848 | 0.061659185 | -1.390155373 | 0.164481702 | 0.305456698 |
| ENSG00000154429 | 282.5382209 | -0.230340997 | 0.116356459 | -1.97961505  | 0.047746801 | 0.117645906 |
| ENSG00000154447 | 62.45073345 | 0.485602583  | 0.234317159 | 2.0724158    | 0.038226681 | 0.098202302 |
| ENSG00000154473 | 772.1463462 | 0.197232197  | 0.087716364 | 2.248522255  | 0.024542908 | 0.068228028 |
| ENSG00000154511 | 34.36024414 | -0.745491653 | 0.306435718 | -2.432783152 | 0.014983271 | 0.045467706 |
| ENSG00000154518 | 516.6178359 | 0.286677463  | 0.101344592 | 2.828739634  | 0.00467317  | 0.016901138 |
| ENSG00000154529 | 23.17139901 | 0.053962038  | 0.356527471 | 0.151354501  | 0.879696079 | 0.934004754 |
| ENSG00000154548 | 44.78357483 | -0.06264454  | 0.261665978 | -0.239406515 | 0.810790378 | 0.888548987 |
| ENSG00000154556 | 459.2674275 | -2.098504894 | 0.106064924 | -19.78509782 | 4.00E-87    | 8.52E-85    |
| ENSG00000154582 | 457.381564  | 0.148392829  | 0.101660664 | 1.459687787  | 0.1443759   | 0.277272848 |
| ENSG00000154608 | 11.9904205  | 0.317725652  | 0.498026233 | 0.637969711  | 0.523493397 | 0.677001436 |
| ENSG00000154639 | 34.77096918 | -2.542596548 | 0.371205695 | -6.849562329 | 7.41E-12    | 1.32E-10    |

|                 |             |              |             |              |             |             |
|-----------------|-------------|--------------|-------------|--------------|-------------|-------------|
| ENSG00000154640 | 229.2355653 | 0.341526448  | 0.124366806 | 2.746122208  | 0.00603043  | 0.020931417 |
| ENSG00000154642 | 213.2005805 | 0.013089018  | 0.127246992 | 0.102863084  | 0.918071637 | 0.955355281 |
| ENSG00000154645 | 42.2567958  | 1.305558817  | 0.282025736 | 4.629218725  | 3.67E-06    | 2.90E-05    |
| ENSG00000154646 | 3615.779027 | 0.312842432  | 0.06220283  | 5.029392293  | 4.92E-07    | 4.65E-06    |
| ENSG00000154654 | 188.9870979 | 1.100207964  | 0.139423053 | 7.891148123  | 2.99E-15    | 7.39E-14    |
| ENSG00000154710 | 19.88321666 | 0.041721724  | 0.412045773 | 0.10125507   | 0.919347982 | 0.955678317 |
| ENSG00000154719 | 121.3918639 | -0.213005175 | 0.171810675 | -1.239766828 | 0.215061651 | 0.371172258 |
| ENSG00000154721 | 201.6852213 | -0.150320246 | 0.129002531 | -1.165250361 | 0.243917666 | 0.407118756 |
| ENSG00000154723 | 1560.093011 | 0.263338168  | 0.07300703  | 3.607024788  | 0.000309728 | 0.001582091 |
| ENSG00000154727 | 258.9651096 | 0.129028558  | 0.115734653 | 1.114865379  | 0.264908115 | 0.431659069 |
| ENSG00000154734 | 1205.46051  | -1.570066072 | 0.071780917 | -21.87302897 | 4.69E-106   | 1.32E-103   |
| ENSG00000154743 | 303.5568932 | 0.091084566  | 0.110480767 | 0.824438209  | 0.409690612 | 0.578151901 |
| ENSG00000154760 | 109.7363758 | -2.08754427  | 0.199872086 | -10.44440125 | 1.55E-25    | 7.14E-24    |
| ENSG00000154767 | 566.4653019 | -0.081997    | 0.088059817 | -0.931151151 | 0.351775382 | 0.523452203 |
| ENSG00000154781 | 285.3484733 | 0.295329859  | 0.111810772 | 2.641336365  | 0.008257969 | 0.027501111 |
| ENSG00000154783 | 19.34113613 | -4.703738759 | 0.790722946 | -5.94865595  | 2.70E-09    | 3.55E-08    |
| ENSG00000154803 | 84.75961717 | 0.496315744  | 0.209727411 | 2.366480093  | 0.01795814  | 0.052884275 |
| ENSG00000154813 | 103.823525  | 0.143869263  | 0.176187414 | 0.81656947   | 0.414174508 | 0.582431606 |
| ENSG00000154814 | 217.4623182 | -0.066767298 | 0.127239928 | -0.524735422 | 0.599767129 | 0.738316437 |
| ENSG00000154822 | 266.1808789 | 0.948571089  | 0.116727263 | 8.126388528  | 4.42E-16    | 1.16E-14    |
| ENSG00000154832 | 291.6846499 | 0.437671477  | 0.115291654 | 3.796211291  | 0.000146924 | 0.000813178 |
| ENSG00000154839 | 152.867193  | 0.123921474  | 0.159907784 | 0.774955858  | 0.438365744 | 0.603816788 |
| ENSG00000154845 | 296.3862497 | -0.166568291 | 0.110799251 | -1.503334085 | 0.132752915 | 0.260917895 |
| ENSG00000154889 | 43.98669331 | -0.034850868 | 0.25929123  | -0.134408202 | 0.893079796 | 0.941935367 |
| ENSG00000154914 | 41.64271801 | -0.107970823 | 0.271517079 | -0.397657574 | 0.690882615 | 0.805446767 |
| ENSG00000154917 | 161.757764  | -0.881792032 | 0.159658129 | -5.523001149 | 3.33E-08    | 3.80E-07    |
| ENSG00000154920 | 128.852936  | -0.463908686 | 0.163879106 | -2.830798241 | 0.0046432   | 0.016830556 |
| ENSG00000154930 | 178.4575881 | 1.350473527  | 0.147422405 | 9.160571807  | 5.16E-20    | 1.75E-18    |
| ENSG00000154945 | 851.2343164 | -0.14285888  | 0.077395252 | -1.845835186 | 0.06491614  | 0.149979773 |
| ENSG00000154957 | 40.8157605  | 0.075180769  | 0.279437714 | 0.269043029  | 0.787896571 | 0.873121205 |
| ENSG00000154978 | 109.0946377 | 0.113087965  | 0.172046867 | 0.657309065  | 0.510982209 | 0.667402909 |
| ENSG00000155008 | 197.6236139 | -0.361710336 | 0.146437248 | -2.470070563 | 0.01350864  | 0.041631389 |
| ENSG00000155011 | 14.70971797 | -1.704429584 | 0.499553096 | -3.411908759 | 0.000645097 | 0.003035738 |
| ENSG00000155016 | 38.95799726 | -0.060898871 | 0.276889408 | -0.219939331 | 0.825918404 | 0.898324082 |
| ENSG00000155034 | 188.4006306 | 0.26667352   | 0.161364845 | 1.652612247  | 0.098409804 | 0.207126538 |
| ENSG00000155090 | 901.1648922 | -0.108240996 | 0.07847821  | -1.379249046 | 0.167817981 | 0.310059773 |
| ENSG00000155096 | 899.1712758 | -0.342321926 | 0.076246082 | -4.489698608 | 7.13E-06    | 5.28E-05    |
| ENSG00000155097 | 496.4468421 | 0.353505381  | 0.092874235 | 3.806280399  | 0.000141072 | 0.000784499 |
| ENSG00000155099 | 221.1638619 | 0.329478622  | 0.125942929 | 2.616094637  | 0.00889419  | 0.029224957 |
| ENSG00000155100 | 236.6611783 | 0.376555699  | 0.120500751 | 3.124924081  | 0.00177851  | 0.007389152 |
| ENSG00000155111 | 172.407328  | 0.083559836  | 0.138615695 | 0.60281656   | 0.546630729 | 0.695077564 |
| ENSG00000155115 | 296.1356379 | 0.415670396  | 0.112927288 | 3.680867597  | 0.000232442 | 0.001222887 |
| ENSG00000155158 | 89.28272933 | -0.723967172 | 0.189787246 | -3.814625004 | 0.00013639  | 0.000761474 |
| ENSG00000155189 | 370.6167205 | -0.357376119 | 0.101808717 | -3.510270332 | 0.000447651 | 0.00219482  |
| ENSG00000155229 | 375.2037508 | 0.095626475  | 0.101795267 | 0.93940002   | 0.347525403 | 0.519343415 |
| ENSG00000155252 | 178.0401171 | -0.087357578 | 0.141834572 | -0.615911739 | 0.537952774 | 0.688718794 |
| ENSG00000155254 | 474.5571152 | 0.078503781  | 0.094772196 | 0.828341901  | 0.4074769   | 0.575837828 |
| ENSG00000155256 | 123.4616073 | -0.00667178  | 0.159196376 | -0.041909119 | 0.966571147 | 0.98273197  |
| ENSG00000155275 | 134.9493887 | -0.041738295 | 0.162351774 | -0.257085548 | 0.797112734 | 0.878938874 |
| ENSG00000155287 | 76.01010514 | 0.10830516   | 0.200875748 | 0.539164937  | 0.589773052 | 0.731165495 |

|                 |             |              |             |              |             |              |
|-----------------|-------------|--------------|-------------|--------------|-------------|--------------|
| ENSG00000155304 | 306.9202842 | -0.184079475 | 0.116465701 | -1.580546659 | 0.11398173  | 0.232077311  |
| ENSG00000155307 | 35.45947031 | -1.095607667 | 0.313852245 | -3.490839035 | 0.000481506 | 0.002342819  |
| ENSG00000155313 | 424.941762  | 0.140025376  | 0.098388683 | 1.423185792  | 0.154682303 | 0.291967524  |
| ENSG00000155329 | 205.6315078 | -0.148015336 | 0.129322864 | -1.144541121 | 0.252399295 | 0.417013984  |
| ENSG00000155330 | 121.2990778 | -0.284787655 | 0.164891565 | -1.727120818 | 0.084145968 | 0.183654196  |
| ENSG00000155363 | 972.1081813 | 0.089735952  | 0.074258892 | 1.208420285  | 0.226885641 | 0.385361548  |
| ENSG00000155366 | 413.9593883 | -0.201483807 | 0.097187579 | -2.073143589 | 0.038158918 | 0.098046154  |
| ENSG00000155367 | 18.09867398 | 0.452792513  | 0.433571726 | 1.044331274  | 0.296332149 | 0.466656692  |
| ENSG00000155368 | 1307.985858 | 0.171376707  | 0.069555894 | 2.463870374  | 0.013744581 | 0.042228812  |
| ENSG00000155380 | 712.9334821 | -0.004253248 | 0.081540326 | -0.052161284 | 0.958400182 | 0.977701483  |
| ENSG00000155393 | 178.5919966 | 0.146687091  | 0.138537528 | 1.058825672  | 0.28967918  | 0.459891889  |
| ENSG00000155438 | 298.5365636 | 0.200204897  | 0.109859853 | 1.822366333  | 0.068399419 | 0.156228723  |
| ENSG00000155463 | 1473.531109 | -0.126824389 | 0.069023384 | -1.837411933 | 0.066149107 | 0.152202539  |
| ENSG00000155506 | 4284.089127 | 0.160889943  | 0.053601524 | 3.001592728  | 0.002685712 | 0.01050379   |
| ENSG00000155508 | 271.8991758 | -0.033199702 | 0.12255871  | -0.270888148 | 0.78647706  | 0.87222827   |
| ENSG00000155542 | 26.17434976 | 0.659511385  | 0.344134649 | 1.916434126  | 0.055309861 | 0.132109779  |
| ENSG00000155545 | 218.7190818 | -0.154503399 | 0.13390822  | -1.153800707 | 0.248581884 | 0.412749377  |
| ENSG00000155561 | 1296.305515 | -0.094916546 | 0.077623645 | -1.222778785 | 0.22141326  | 0.379199228  |
| ENSG00000155592 | 198.4155716 | -0.356264887 | 0.132278605 | -2.69329183  | 0.007075031 | 0.024046204  |
| ENSG00000155621 | 76.41104938 | -0.842220203 | 0.210856119 | -3.994288644 | 6.49E-05    | 0.00038986   |
| ENSG00000155629 | 51.91310254 | 2.575848881  | 1.215989297 | 2.118315423  | 0.034148363 | 0.089643442  |
| ENSG00000155636 | 42.36490577 | 0.104004085  | 0.269307481 | 0.386190849  | 0.69935533  | 0.811284526  |
| ENSG00000155657 | 12.27255121 | 0.074310868  | 0.504635626 | 0.147256483  | 0.882929579 | 0.935529895  |
| ENSG00000155660 | 2919.13742  | 1.035857301  | 0.085821839 | 12.06985674  | 1.52E-33    | 9.39E-32     |
| ENSG00000155666 | 36.67714799 | 0.470626825  | 0.300251425 | 1.567442437  | 0.117011311 | 0.236872444  |
| ENSG00000155729 | 97.22591831 | -0.09740146  | 0.184502602 | -0.527913749 | 0.597559201 | 0.736825325  |
| ENSG00000155744 | 109.1973941 | -0.395377384 | 0.170414986 | -2.320085776 | 0.020336238 | 0.058573535  |
| ENSG00000155755 | 204.6842244 | -0.086903402 | 0.133804033 | -0.649482678 | 0.516026439 | 0.671168832  |
| ENSG00000155760 | 227.9867956 | -0.613611191 | 0.127297041 | -4.820309918 | 1.43E-06    | 1.23E-05     |
| ENSG00000155792 | 15.7220831  | 0.443839441  | 0.450720176 | 0.984733908  | 0.324754793 | 0.496769092  |
| ENSG00000155827 | 462.2578591 | -0.137140707 | 0.092113964 | -1.488815603 | 0.136535932 | 0.266119085  |
| ENSG00000155846 | 456.2618478 | -0.066627734 | 0.09264999  | -0.719133741 | 0.47205852  | 0.633818202  |
| ENSG00000155850 | 193.8478568 | 0.064682957  | 0.142410541 | 0.454200625  | 0.649684433 | 0.7744449867 |
| ENSG00000155858 | 59.21839009 | 0.09874422   | 0.226442656 | 0.436067221  | 0.662787959 | 0.784604829  |
| ENSG00000155868 | 24.47077154 | -0.080673807 | 0.351354406 | -0.229608071 | 0.818396334 | 0.892848047  |
| ENSG00000155876 | 119.8473029 | 0.025556943  | 0.169956598 | 0.150373351  | 0.880470065 | 0.934116144  |
| ENSG00000155893 | 42.12363706 | -0.310224054 | 0.277364538 | -1.118470503 | 0.263366098 | 0.429874922  |
| ENSG00000155903 | 134.3540292 | 0.232331487  | 0.15710301  | 1.478848096  | 0.139180918 | 0.269814292  |
| ENSG00000155906 | 155.0272986 | 0.198269663  | 0.166287205 | 1.19233265   | 0.233130837 | 0.393279993  |
| ENSG00000155957 | 14.09588504 | 0.203566002  | 0.47371605  | 0.429721564  | 0.667398195 | 0.787413177  |
| ENSG00000155959 | 233.8324939 | 0.101721346  | 0.12438315  | 0.817806481  | 0.413467697 | 0.581859088  |
| ENSG00000155961 | 47.30106439 | -0.104249431 | 0.269036807 | -0.387491334 | 0.698392499 | 0.810770201  |
| ENSG00000155970 | 36.65757226 | 0.183677434  | 0.288488173 | 0.636689649  | 0.524327017 | 0.677697977  |
| ENSG00000155975 | 213.1966823 | 0.096086605  | 0.129080855 | 0.74439083   | 0.456640065 | 0.620271199  |
| ENSG00000155980 | 123.7759067 | -0.444780696 | 0.169248284 | -2.62797758  | 0.008589418 | 0.028429677  |
| ENSG00000156011 | 197.6343743 | -0.392150997 | 0.132482341 | -2.960024663 | 0.003076144 | 0.011786851  |
| ENSG00000156017 | 318.1523013 | 0.302394391  | 0.106840885 | 2.830324664  | 0.004650079 | 0.016834964  |
| ENSG00000156026 | 99.33972657 | -0.141862726 | 0.180947051 | -0.784001319 | 0.433039336 | 0.599401284  |
| ENSG00000156030 | 1022.505551 | 0.046736976  | 0.074245939 | 0.629488651  | 0.529029196 | 0.681643104  |
| ENSG00000156042 | 9.145912326 | -0.146858509 | 0.568809931 | -0.258185557 | 0.796263704 | 0.878366283  |

|                 |             |              |             |              |             |             |
|-----------------|-------------|--------------|-------------|--------------|-------------|-------------|
| ENSG00000156050 | 20.68011802 | -0.033312967 | 0.395441785 | -0.084242404 | 0.932863705 | 0.963270344 |
| ENSG00000156052 | 406.2003858 | -0.181760059 | 0.09850821  | -1.845125998 | 0.065019212 | 0.150168509 |
| ENSG00000156076 | 19.04146636 | -5.12937356  | 0.896999818 | -5.718366332 | 1.08E-08    | 1.31E-07    |
| ENSG00000156103 | 60.19014916 | -6.39045084  | 0.746397165 | -8.561729786 | 1.11E-17    | 3.22E-16    |
| ENSG00000156110 | 129.4618407 | 0.030551706  | 0.175667249 | 0.173918054  | 0.861929864 | 0.921617562 |
| ENSG00000156136 | 104.1232571 | -0.011474462 | 0.184605825 | -0.062156552 | 0.950438162 | 0.972594511 |
| ENSG00000156140 | 111.038815  | -1.59182116  | 0.18381389  | -8.659961231 | 4.72E-18    | 1.42E-16    |
| ENSG00000156162 | 175.1346733 | -0.053713328 | 0.1427879   | -0.376175629 | 0.706786332 | 0.815929291 |
| ENSG00000156170 | 89.54628383 | 0.288264202  | 0.188622837 | 1.52825717   | 0.1264487   | 0.251483064 |
| ENSG00000156171 | 184.9075295 | 0.008508473  | 0.139646294 | 0.06092874   | 0.951415961 | 0.973382375 |
| ENSG00000156172 | 71.21922997 | -0.278515117 | 0.20962343  | -1.328644975 | 0.183965127 | 0.331387296 |
| ENSG00000156232 | 118.3197175 | 0.015437842  | 0.163631115 | 0.094345395  | 0.924834791 | 0.958816254 |
| ENSG00000156239 | 67.88608711 | 0.121582881  | 0.211348676 | 0.575271551  | 0.565107659 | 0.71091414  |
| ENSG00000156253 | 80.76876216 | -0.441690722 | 0.199675564 | -2.212041937 | 0.026963767 | 0.073917331 |
| ENSG00000156256 | 337.7153021 | -0.155161593 | 0.104150481 | -1.489782777 | 0.136281361 | 0.265807314 |
| ENSG00000156261 | 1959.398914 | -0.353521887 | 0.062943759 | -5.616472427 | 1.95E-08    | 2.29E-07    |
| ENSG00000156265 | 20.77744572 | -1.750169314 | 0.425363592 | -4.114525428 | 3.88E-05    | 0.00024472  |
| ENSG00000156273 | 242.847699  | 0.01976444   | 0.126572303 | 0.156151381  | 0.875913699 | 0.931201069 |
| ENSG00000156299 | 150.2566612 | -0.740558114 | 0.150319449 | -4.926562205 | 8.37E-07    | 7.54E-06    |
| ENSG00000156304 | 946.7414271 | -0.06397915  | 0.073302963 | -0.872804418 | 0.382769691 | 0.552299228 |
| ENSG00000156313 | 93.49326121 | -0.218676673 | 0.18459854  | -1.184606731 | 0.236172975 | 0.397355584 |
| ENSG00000156345 | 64.38551322 | 0.58158398   | 0.227132072 | 2.560554194  | 0.010450536 | 0.033462203 |
| ENSG00000156374 | 110.6361362 | 0.109662423  | 0.181710901 | 0.603499417  | 0.546176503 | 0.694729455 |
| ENSG00000156381 | 148.953503  | 0.067429957  | 0.15083373  | 0.447048264  | 0.654840213 | 0.77867946  |
| ENSG00000156384 | 21.22110864 | 0.295266923  | 0.38543608  | 0.766059376  | 0.443640973 | 0.60851721  |
| ENSG00000156398 | 140.7594793 | -0.178072895 | 0.155223619 | -1.147202314 | 0.251298015 | 0.415585498 |
| ENSG00000156411 | 1086.120294 | 0.513353312  | 0.07235261  | 7.095159543  | 1.29E-12    | 2.55E-11    |
| ENSG00000156453 | 18.55267577 | -4.338159763 | 0.729830941 | -5.944061181 | 2.78E-09    | 3.65E-08    |
| ENSG00000156463 | 114.403769  | -1.318281384 | 0.189122268 | -6.970524409 | 3.16E-12    | 5.93E-11    |
| ENSG00000156467 | 3598.364346 | 0.22889147   | 0.065848388 | 3.47603757   | 0.000508881 | 0.002458133 |
| ENSG00000156469 | 109.5043449 | 0.260469093  | 0.173090126 | 1.504817749  | 0.132370939 | 0.260385742 |
| ENSG00000156471 | 767.7310639 | 0.211488879  | 0.082646991 | 2.558942279  | 0.010499117 | 0.033579485 |
| ENSG00000156482 | 8199.538328 | 0.214376062  | 0.065869467 | 3.254558934  | 0.001135686 | 0.005024561 |
| ENSG00000156500 | 15.98640695 | -0.366632485 | 0.437940852 | -0.83717352  | 0.402495039 | 0.57074983  |
| ENSG00000156502 | 230.2027632 | -0.072974308 | 0.122578066 | -0.59532925  | 0.551623408 | 0.699273893 |
| ENSG00000156504 | 280.1741083 | -0.044490288 | 0.123071329 | -0.361500019 | 0.717725691 | 0.824088015 |
| ENSG00000156508 | 5112.583413 | 0.021694395  | 0.066208535 | 0.327667651  | 0.743162965 | 0.842922019 |
| ENSG00000156509 | 74.94389791 | -0.595316779 | 0.209486387 | -2.841792189 | 0.004486072 | 0.016329582 |
| ENSG00000156515 | 963.2618447 | 0.210850201  | 0.071584265 | 2.945482503  | 0.003224514 | 0.012283054 |
| ENSG00000156521 | 202.4009396 | -0.157928806 | 0.141703477 | -1.114501985 | 0.265063893 | 0.431693045 |
| ENSG00000156531 | 290.9098636 | -0.135641661 | 0.11205325  | -1.210510724 | 0.226082978 | 0.384477917 |
| ENSG00000156587 | 97.3412094  | 0.515316068  | 0.18484312  | 2.787856365  | 0.005305806 | 0.018804464 |
| ENSG00000156599 | 627.9751415 | 0.02619203   | 0.085488494 | 0.30638076   | 0.759314756 | 0.854860493 |
| ENSG00000156603 | 100.501246  | 0.177599887  | 0.182224519 | 0.97462124   | 0.329748174 | 0.502217902 |
| ENSG00000156639 | 445.5234459 | 0.029715626  | 0.103532869 | 0.287016353  | 0.774099799 | 0.864738597 |
| ENSG00000156642 | 466.0519445 | 0.33768747   | 0.092624263 | 3.645777695  | 0.000266584 | 0.001382322 |
| ENSG00000156650 | 1304.061813 | -0.257738475 | 0.070031955 | -3.680298149 | 0.000232961 | 0.001225162 |
| ENSG00000156671 | 333.1093348 | -0.217254    | 0.104385354 | -2.081268992 | 0.037409292 | 0.096455272 |
| ENSG00000156675 | 373.3300921 | -0.01051155  | 0.102928447 | -0.102124825 | 0.918657596 | 0.955355281 |
| ENSG00000156697 | 316.3310443 | 0.415960728  | 0.10902604  | 3.815242009  | 0.00013605  | 0.000759876 |

|                 |             |              |             |              |             |             |
|-----------------|-------------|--------------|-------------|--------------|-------------|-------------|
| ENSG00000156709 | 608.7531821 | -0.209959862 | 0.086247053 | -2.434400419 | 0.014916484 | 0.04531398  |
| ENSG00000156735 | 309.7765155 | -0.16012068  | 0.110443699 | -1.449794612 | 0.147115803 | 0.281126231 |
| ENSG00000156787 | 130.9341569 | -0.215245447 | 0.15747758  | -1.366832327 | 0.171677868 | 0.314824216 |
| ENSG00000156795 | 48.81556448 | 0.059367912  | 0.251894818 | 0.235685325  | 0.813676858 | 0.890577    |
| ENSG00000156802 | 1372.932368 | -0.046575388 | 0.065834991 | -0.707456427 | 0.479282881 | 0.639970212 |
| ENSG00000156831 | 108.5704268 | -0.23738817  | 0.178236783 | -1.331869698 | 0.18290301  | 0.329996851 |
| ENSG00000156853 | 181.4250708 | -0.149094374 | 0.144374969 | -1.032688527 | 0.301749684 | 0.47217935  |
| ENSG00000156858 | 604.7071313 | 0.395513443  | 0.088313609 | 4.47851069   | 7.52E-06    | 5.54E-05    |
| ENSG00000156860 | 922.3328033 | 0.26287048   | 0.104373015 | 2.518567469  | 0.011783331 | 0.037070648 |
| ENSG00000156869 | 94.08749577 | -0.4054223   | 0.183375962 | -2.210880285 | 0.027044128 | 0.074066849 |
| ENSG00000156873 | 146.2429717 | -0.14479533  | 0.154028625 | -0.940054683 | 0.347189512 | 0.519047582 |
| ENSG00000156875 | 58.46500841 | 0.019125433  | 0.236453043 | 0.080884699  | 0.935533648 | 0.964731953 |
| ENSG00000156876 | 184.905512  | -0.101501191 | 0.13687982  | -0.741535099 | 0.458369058 | 0.622157712 |
| ENSG00000156928 | 155.4865228 | 0.079076166  | 0.152612222 | 0.518150938  | 0.604352962 | 0.741751513 |
| ENSG00000156931 | 95.24616054 | -0.330041234 | 0.185846107 | -1.775884564 | 0.075751946 | 0.168804037 |
| ENSG00000156958 | 224.3202849 | -0.719977485 | 0.133235303 | -5.403804166 | 6.52E-08    | 7.09E-07    |
| ENSG00000156970 | 537.5368863 | 0.11278253   | 0.088033976 | 1.281125028  | 0.200149754 | 0.352230468 |
| ENSG00000156973 | 56.268814   | -0.515660981 | 0.235884851 | -2.186070779 | 0.028810427 | 0.077946856 |
| ENSG00000156976 | 1166.57994  | 0.006779703  | 0.070361677 | 0.096355047  | 0.923238593 | 0.957667444 |
| ENSG00000156983 | 574.669552  | 0.075054759  | 0.089799481 | 0.835803923  | 0.403265219 | 0.571553479 |
| ENSG00000156990 | 351.9664085 | 0.174870064  | 0.109311467 | 1.599741265  | 0.109655993 | 0.225426275 |
| ENSG00000157014 | 215.5866529 | 0.416505849  | 0.136556338 | 3.050066029  | 0.002287911 | 0.009171884 |
| ENSG00000157020 | 745.2574234 | 0.149336632  | 0.083515939 | 1.78812133   | 0.073756435 | 0.16528155  |
| ENSG00000157036 | 131.5061981 | 0.259191477  | 0.157084032 | 1.650017979  | 0.098939259 | 0.207960462 |
| ENSG00000157045 | 96.60668355 | 0.034695791  | 0.178339091 | 0.194549557  | 0.845745596 | 0.910778012 |
| ENSG00000157064 | 16.83135986 | -1.838970145 | 0.475842516 | -3.86466128  | 0.000111243 | 0.000634702 |
| ENSG00000157077 | 219.7120247 | 0.119146227  | 0.135799998 | 0.877365455  | 0.38028817  | 0.549805262 |
| ENSG00000157106 | 1058.253053 | 0.007873589  | 0.076171395 | 0.103366737  | 0.91767191  | 0.955355281 |
| ENSG00000157107 | 141.9580252 | 0.140515683  | 0.150419616 | 0.934157969  | 0.350222413 | 0.522247796 |
| ENSG00000157110 | 140.4981636 | -9.451583696 | 1.185001443 | -7.976010287 | 1.51E-15    | 3.80E-14    |
| ENSG00000157111 | 26.45248893 | 1.264628118  | 0.344605495 | 3.669785124  | 0.000242754 | 0.001271429 |
| ENSG00000157152 | 170.3707053 | 0.37559553   | 0.144893187 | 2.592223542  | 0.009535779 | 0.031013912 |
| ENSG00000157181 | 278.7524277 | 0.049216913  | 0.11424935  | 0.430785056  | 0.666624667 | 0.786764972 |
| ENSG00000157184 | 271.6335525 | -0.198597033 | 0.114082117 | -1.740825272 | 0.081714211 | 0.179686837 |
| ENSG00000157191 | 108.0232687 | 0.036751552  | 0.177883125 | 0.206605048  | 0.836318318 | 0.904331203 |
| ENSG00000157193 | 486.189678  | 0.35235409   | 0.094766938 | 3.718112027  | 0.000200717 | 0.001074086 |
| ENSG00000157212 | 522.3782474 | 0.478878313  | 0.088268399 | 5.425252078  | 5.79E-08    | 6.34E-07    |
| ENSG00000157214 | 177.8997588 | 0.150520704  | 0.146938493 | 1.024378982  | 0.305656305 | 0.47668118  |
| ENSG00000157216 | 464.6340571 | -0.028401035 | 0.092896637 | -0.305727266 | 0.759812311 | 0.855077995 |
| ENSG00000157224 | 164.948932  | -0.174116757 | 0.156013094 | -1.116039383 | 0.264405277 | 0.43107021  |
| ENSG00000157240 | 120.8075097 | 1.009208771  | 0.171633224 | 5.880031539  | 4.10E-09    | 5.27E-08    |
| ENSG00000157259 | 333.0664171 | 0.114920412  | 0.107705729 | 1.066985137  | 0.285978548 | 0.455664775 |
| ENSG00000157306 | 20.98474873 | 1.265087418  | 0.386166035 | 3.276019388  | 0.001052813 | 0.004708331 |
| ENSG00000157326 | 135.4667423 | 0.111445644  | 0.153916733 | 0.724064511  | 0.469026131 | 0.631013319 |
| ENSG00000157343 | 14.59136847 | -0.084490729 | 0.455326264 | -0.18556085  | 0.852789157 | 0.915625567 |
| ENSG00000157349 | 44.50860685 | 0.092595932  | 0.26046669  | 0.355500089  | 0.722214978 | 0.827735087 |
| ENSG00000157350 | 256.9816981 | -0.118987991 | 0.117901309 | -1.009216875 | 0.312870635 | 0.484076461 |
| ENSG00000157353 | 57.46384328 | -0.188445045 | 0.231389402 | -0.814406553 | 0.415412086 | 0.583296038 |
| ENSG00000157379 | 13.04851813 | 0.298850673  | 0.488333282 | 0.611980964  | 0.540550352 | 0.690408328 |
| ENSG00000157426 | 83.44052267 | -0.209724948 | 0.198229675 | -1.057989666 | 0.290060154 | 0.460340637 |

|                 |             |              |             |              |             |             |
|-----------------|-------------|--------------|-------------|--------------|-------------|-------------|
| ENSG00000157429 | 10.92784568 | -0.371540424 | 0.514776294 | -0.721751232 | 0.470447438 | 0.632319889 |
| ENSG00000157450 | 404.9368909 | 0.193056887  | 0.107939434 | 1.788566787  | 0.073684611 | 0.16521113  |
| ENSG00000157456 | 334.956363  | -0.101488576 | 0.107331625 | -0.945560786 | 0.344372653 | 0.516209867 |
| ENSG00000157483 | 157.3359976 | -0.241115621 | 0.14785441  | -1.630763809 | 0.102940167 | 0.214551686 |
| ENSG00000157500 | 811.2665905 | 0.200147335  | 0.076120568 | 2.629346308  | 0.008554919 | 0.028342205 |
| ENSG00000157502 | 34.60082088 | 0.801630986  | 0.308439153 | 2.598992306  | 0.009349787 | 0.030514976 |
| ENSG00000157514 | 98.34501492 | -0.315170704 | 0.179651639 | -1.754343609 | 0.079371648 | 0.175414338 |
| ENSG00000157538 | 318.9636063 | 0.025647988  | 0.109326607 | 0.234599686  | 0.814519453 | 0.891086819 |
| ENSG00000157540 | 830.880423  | 0.071827906  | 0.082846175 | 0.867003289  | 0.385940207 | 0.554779174 |
| ENSG00000157557 | 13.42972995 | -0.3884539   | 0.493499078 | -0.787142098 | 0.431198688 | 0.597556742 |
| ENSG00000157570 | 9.600004386 | -3.34419176  | 0.794095977 | -4.211319357 | 2.54E-05    | 0.000167197 |
| ENSG00000157578 | 16.93977955 | -1.091893115 | 0.438892231 | -2.487838788 | 0.012852198 | 0.039932497 |
| ENSG00000157593 | 326.0903838 | 0.201783332  | 0.112419885 | 1.794907836  | 0.072668385 | 0.163532972 |
| ENSG00000157600 | 142.2223811 | 0.071924566  | 0.158152715 | 0.454779202  | 0.649268094 | 0.774150659 |
| ENSG00000157613 | 231.8098018 | 0.129360855  | 0.130247107 | 0.993195608  | 0.320614638 | 0.492258588 |
| ENSG00000157617 | 510.5268727 | 0.554121177  | 0.090200325 | 6.143228162  | 8.09E-10    | 1.14E-08    |
| ENSG00000157625 | 191.7960491 | -0.065790617 | 0.145184632 | -0.453151386 | 0.650439735 | 0.775087119 |
| ENSG00000157637 | 567.1652968 | -0.077158838 | 0.100533665 | -0.767492538 | 0.442788728 | 0.607763657 |
| ENSG00000157653 | 9.177783899 | 0.49983478   | 0.564339805 | 0.885698254  | 0.37578015  | 0.545716162 |
| ENSG00000157657 | 514.8618703 | -0.212130475 | 0.09189729  | -2.30834308  | 0.020980062 | 0.060070716 |
| ENSG00000157693 | 184.432852  | -0.371161712 | 0.142746887 | -2.600138752 | 0.009318607 | 0.030441507 |
| ENSG00000157734 | 38.73180444 | 0.16376561   | 0.275655562 | 0.594095069  | 0.552448529 | 0.699814635 |
| ENSG00000157741 | 875.1520401 | 1.33783593   | 0.083799831 | 15.96466139  | 2.25E-57    | 2.80E-55    |
| ENSG00000157764 | 728.5446225 | 0.303273725  | 0.081630581 | 3.715197414  | 0.000203045 | 0.00108489  |
| ENSG00000157778 | 341.9929248 | 0.361841951  | 0.118941706 | 3.042178923  | 0.002348722 | 0.009367548 |
| ENSG00000157782 | 23.46867559 | -2.098027474 | 0.414972836 | -5.055818815 | 4.29E-07    | 4.09E-06    |
| ENSG00000157796 | 116.7942276 | 0.069672938  | 0.175364968 | 0.397302487  | 0.691144414 | 0.805563918 |
| ENSG00000157800 | 383.6490937 | 0.834548766  | 0.104895194 | 7.95602482   | 1.78E-15    | 4.44E-14    |
| ENSG00000157823 | 174.9001436 | 0.096883176  | 0.142642772 | 0.67920144   | 0.497010235 | 0.655435794 |
| ENSG00000157827 | 463.3831731 | 0.164572698  | 0.098012482 | 1.679099381  | 0.093132677 | 0.198548295 |
| ENSG00000157833 | 234.6882492 | -0.005209092 | 0.130148581 | -0.040024191 | 0.96807384  | 0.983121257 |
| ENSG00000157837 | 281.4985709 | 0.186027397  | 0.117159626 | 1.587811464  | 0.112328978 | 0.229711044 |
| ENSG00000157869 | 127.5063854 | 1.215495674  | 0.165186825 | 7.358308836  | 1.86E-13    | 4.00E-12    |
| ENSG00000157870 | 79.01777201 | -0.344212936 | 0.205445703 | -1.675444804 | 0.093846992 | 0.199616702 |
| ENSG00000157873 | 21.92526974 | 0.782428995  | 0.407844457 | 1.918449502  | 0.055054039 | 0.131610635 |
| ENSG00000157881 | 238.2548581 | -0.0053567   | 0.124873312 | -0.042897074 | 0.965783581 | 0.982286725 |
| ENSG00000157890 | 13.3383716  | 0.433274892  | 0.483317653 | 0.896459894  | 0.370007191 | 0.541314309 |
| ENSG00000157895 | 122.8332135 | -0.001709587 | 0.167791059 | -0.010188786 | 0.991870665 | 0.9958407   |
| ENSG00000157911 | 181.3182315 | -0.101974119 | 0.137854573 | -0.739722424 | 0.459468439 | 0.622687232 |
| ENSG00000157916 | 453.6626582 | 0.221790143  | 0.096941011 | 2.287887647  | 0.022144065 | 0.06262486  |
| ENSG00000157927 | 83.21654599 | -0.796480284 | 0.199147785 | -3.999443351 | 6.35E-05    | 0.00038212  |
| ENSG00000157933 | 647.349492  | 0.1228108    | 0.086642119 | 1.417449186  | 0.156351641 | 0.294012249 |
| ENSG00000157954 | 312.0934054 | 0.080090352  | 0.110642753 | 0.723864418  | 0.469148977 | 0.631118145 |
| ENSG00000157978 | 94.61922137 | -0.069957075 | 0.196390041 | -0.356214982 | 0.721679573 | 0.82741046  |
| ENSG00000157985 | 601.731489  | -0.083727827 | 0.08619882  | -0.971333785 | 0.33138209  | 0.503834204 |
| ENSG00000158006 | 87.33070517 | 0.118304059  | 0.190059365 | 0.622458457  | 0.533640452 | 0.68507105  |
| ENSG00000158008 | 24.29514813 | -1.327044648 | 0.377612148 | -3.514306032 | 0.000440905 | 0.002167035 |
| ENSG00000158019 | 188.9584035 | 0.176685516  | 0.138411746 | 1.276521111  | 0.201771369 | 0.354241023 |
| ENSG00000158023 | 35.35572111 | 0.32842754   | 0.308367916 | 1.065050945  | 0.286852876 | 0.456643513 |
| ENSG00000158042 | 376.3459738 | 0.564648255  | 0.103780616 | 5.440787275  | 5.30E-08    | 5.85E-07    |

|                 |             |              |             |              |             |             |
|-----------------|-------------|--------------|-------------|--------------|-------------|-------------|
| ENSG00000158050 | 478.6287742 | 2.057122678  | 0.102255048 | 20.11756592  | 5.18E-90    | 1.15E-87    |
| ENSG00000158062 | 96.17504516 | -0.556130311 | 0.185358297 | -3.000298989 | 0.002697147 | 0.01053365  |
| ENSG00000158077 | 12.53272208 | -0.947609274 | 0.506229162 | -1.871897837 | 0.061220739 | 0.143160932 |
| ENSG00000158079 | 162.8564686 | -0.818694596 | 0.156846874 | -5.21970616  | 1.79E-07    | 1.81E-06    |
| ENSG00000158089 | 296.2167624 | 2.899379533  | 0.135237093 | 21.43923285  | 5.76E-102   | 1.55E-99    |
| ENSG00000158092 | 159.1831322 | 0.206057705  | 0.142368214 | 1.447357516  | 0.147796818 | 0.281934703 |
| ENSG00000158106 | 196.6073268 | 0.277790719  | 0.143584957 | 1.934678432  | 0.053029769 | 0.127618496 |
| ENSG00000158109 | 49.66871106 | 0.42447467   | 0.246272265 | 1.723599165  | 0.084780229 | 0.184722799 |
| ENSG00000158122 | 119.1165368 | 0.605369174  | 0.165993916 | 3.646935913  | 0.000265386 | 0.001377125 |
| ENSG00000158158 | 338.0764022 | 0.207933533  | 0.105886008 | 1.963748907  | 0.049559218 | 0.121028918 |
| ENSG00000158161 | 222.8436597 | 0.00583303   | 0.128345455 | 0.045447892  | 0.963750308 | 0.981000042 |
| ENSG00000158163 | 148.4737505 | -0.371584049 | 0.166516493 | -2.23151498  | 0.025647036 | 0.070820507 |
| ENSG00000158164 | 14.1997563  | -0.791448456 | 0.473284868 | -1.672245426 | 0.094475936 | 0.200681004 |
| ENSG00000158169 | 209.8318654 | -1.134824534 | 0.134991174 | -8.40665726  | 4.22E-17    | 1.17E-15    |
| ENSG00000158186 | 400.7960216 | 0.075126706  | 0.10212704  | 0.735620131  | 0.461961908 | 0.624920929 |
| ENSG00000158195 | 1254.73618  | 0.312221041  | 0.069524388 | 4.490813255  | 7.10E-06    | 5.26E-05    |
| ENSG00000158201 | 79.76540273 | -0.245500258 | 0.197541041 | -1.242781029 | 0.213948535 | 0.369568996 |
| ENSG00000158234 | 88.15750341 | 0.056709687  | 0.190009952 | 0.298456402  | 0.765354846 | 0.858571124 |
| ENSG00000158246 | 12.56010305 | 0.311254309  | 0.507048616 | 0.613854963  | 0.539311174 | 0.689580557 |
| ENSG00000158270 | 6.62525523  | -6.00868758  | 1.295354237 | -4.638644326 | 3.51E-06    | 2.78E-05    |
| ENSG00000158286 | 368.2047998 | 0.276132904  | 0.106376958 | 2.595796221  | 0.009437202 | 0.030728876 |
| ENSG00000158290 | 557.6640364 | 0.304449137  | 0.093769517 | 3.246781538  | 0.001167179 | 0.005136394 |
| ENSG00000158292 | 376.2052705 | 0.161716417  | 0.102139014 | 1.583297217  | 0.113353737 | 0.231301561 |
| ENSG00000158296 | 34.83931426 | -1.251432644 | 0.328539023 | -3.80908372  | 0.000139483 | 0.000776581 |
| ENSG00000158301 | 71.58759176 | -0.406592777 | 0.218507424 | -1.860773287 | 0.062776199 | 0.145931074 |
| ENSG00000158321 | 11.40855184 | 1.182652773  | 0.526468183 | 2.246389833  | 0.024679049 | 0.068538276 |
| ENSG00000158373 | 776.5386969 | -0.642034189 | 0.168870475 | -3.801932744 | 0.000143572 | 0.000797766 |
| ENSG00000158402 | 101.6243799 | -0.54671154  | 0.182714397 | -2.992164537 | 0.002770069 | 0.010781702 |
| ENSG00000158406 | 560.6459742 | -0.215317563 | 0.107789259 | -1.997579024 | 0.045762319 | 0.113794176 |
| ENSG00000158411 | 169.749672  | 0.186128928  | 0.142565864 | 1.305564477  | 0.191700707 | 0.341945376 |
| ENSG00000158417 | 3722.197207 | 0.324886409  | 0.057713618 | 5.629285114  | 1.81E-08    | 2.14E-07    |
| ENSG00000158423 | 27.95666445 | -0.174392448 | 0.335358772 | -0.520017554 | 0.60305134  | 0.741060465 |
| ENSG00000158435 | 279.7294867 | -0.000245792 | 0.121263032 | -0.002026935 | 0.998382741 | 0.999236364 |
| ENSG00000158457 | 52.17186021 | 0.505999101  | 0.244688147 | 2.067934661  | 0.038646168 | 0.09908062  |
| ENSG00000158458 | 108.4332887 | 0.611756389  | 0.173749525 | 3.520909706  | 0.000430069 | 0.002118226 |
| ENSG00000158467 | 204.388198  | 0.436587275  | 0.136382375 | 3.20120011   | 0.001368565 | 0.005906171 |
| ENSG00000158470 | 712.0902099 | -0.18485161  | 0.087464897 | -2.113437681 | 0.034563324 | 0.090479129 |
| ENSG00000158480 | 136.9806107 | 0.125829699  | 0.155423188 | 0.809594123  | 0.418173487 | 0.586118836 |
| ENSG00000158526 | 195.6717306 | 0.077998724  | 0.129702518 | 0.601366304  | 0.547596036 | 0.695834778 |
| ENSG00000158528 | 327.4302702 | 0.531318279  | 0.114547328 | 4.638417046  | 3.51E-06    | 2.78E-05    |
| ENSG00000158545 | 649.6916594 | -0.656318506 | 0.08331327  | -7.877718684 | 3.33E-15    | 8.13E-14    |
| ENSG00000158552 | 60.33613548 | 0.370222715  | 0.227721722 | 1.625768117  | 0.103998993 | 0.216073637 |
| ENSG00000158604 | 405.2462844 | 0.083275374  | 0.099071921 | 0.840554754  | 0.400597415 | 0.568747917 |
| ENSG00000158615 | 1643.615563 | 0.00456455   | 0.07051607  | 0.064730635  | 0.948388471 | 0.971358017 |
| ENSG00000158623 | 140.6215849 | 0.484823367  | 0.169855557 | 2.854327382  | 0.004312806 | 0.015788895 |
| ENSG00000158636 | 350.500741  | -0.111433195 | 0.104004359 | -1.071428122 | 0.283976974 | 0.453633078 |
| ENSG00000158669 | 349.6104978 | -0.231683258 | 0.110622369 | -2.094361751 | 0.036227767 | 0.09409975  |
| ENSG00000158710 | 180.2747505 | -0.382376462 | 0.137290424 | -2.78516485  | 0.005350052 | 0.018934788 |
| ENSG00000158711 | 1631.806112 | 0.251953529  | 0.073360549 | 3.434455338  | 0.000593746 | 0.002826279 |
| ENSG00000158715 | 46.41679691 | 1.007357225  | 0.261961983 | 3.845432896  | 0.00012034  | 0.000681069 |

|                 |             |              |             |              |             |             |
|-----------------|-------------|--------------|-------------|--------------|-------------|-------------|
| ENSG00000158717 | 69.75545924 | -0.632214239 | 0.21673266  | -2.917023398 | 0.003533893 | 0.013319182 |
| ENSG00000158747 | 158.0093903 | 0.112526757  | 0.14741467  | 0.763334865  | 0.445263714 | 0.610325858 |
| ENSG00000158748 | 13.52945478 | -1.370973008 | 0.517294779 | -2.650274204 | 0.008042647 | 0.026870075 |
| ENSG00000158769 | 24.39805547 | -0.533522929 | 0.35524096  | -1.501862084 | 0.13313273  | 0.261408368 |
| ENSG00000158773 | 183.9622736 | -0.232398354 | 0.138295193 | -1.680451424 | 0.092869518 | 0.19819783  |
| ENSG00000158792 | 195.8175408 | 0.108963839  | 0.15316059  | 0.711435228  | 0.476814575 | 0.63753861  |
| ENSG00000158793 | 113.4159511 | -0.312120547 | 0.171836206 | -1.816384066 | 0.069311478 | 0.157798757 |
| ENSG00000158796 | 430.1996311 | 0.160120775  | 0.103479507 | 1.54736701   | 0.121774772 | 0.244751784 |
| ENSG00000158805 | 386.028486  | -0.077325027 | 0.108239724 | -0.714386774 | 0.474988048 | 0.635988668 |
| ENSG00000158813 | 19.71751748 | -0.529398179 | 0.418402025 | -1.265285892 | 0.205768862 | 0.359372772 |
| ENSG00000158828 | 127.8465339 | -0.441732946 | 0.158785673 | -2.781944604 | 0.005403426 | 0.019090022 |
| ENSG00000158850 | 382.3751682 | 0.636476097  | 0.103685471 | 6.138527299  | 8.33E-10    | 1.17E-08    |
| ENSG00000158856 | 26.58098429 | -0.693480531 | 0.342365185 | -2.025557974 | 0.042810102 | 0.108021107 |
| ENSG00000158863 | 196.3300161 | -0.01151126  | 0.131313268 | -0.087662584 | 0.930144858 | 0.962131431 |
| ENSG00000158864 | 875.0861676 | 0.112217254  | 0.077590572 | 1.446274358  | 0.148100265 | 0.28231299  |
| ENSG00000158882 | 283.8594063 | 0.000292037  | 0.116249127 | 0.002512165  | 0.997995584 | 0.999084016 |
| ENSG00000158941 | 693.807195  | -0.039565488 | 0.081984651 | -0.482596279 | 0.629382422 | 0.759693543 |
| ENSG00000158966 | 230.9334182 | 0.259454685  | 0.123225764 | 2.105523041  | 0.035245804 | 0.091923098 |
| ENSG00000158985 | 148.4617011 | -0.382232703 | 0.164712502 | -2.320605285 | 0.020308157 | 0.058528658 |
| ENSG00000158987 | 128.3121842 | -0.052164828 | 0.156926281 | -0.332416135 | 0.739575057 | 0.840729783 |
| ENSG00000159023 | 586.0239213 | -0.5401069   | 0.092414999 | -5.84436408  | 5.09E-09    | 6.49E-08    |
| ENSG00000159055 | 99.20645973 | 0.03081141   | 0.197989197 | 0.155621673  | 0.876331241 | 0.931503968 |
| ENSG00000159063 | 197.6855113 | -0.088191045 | 0.1357283   | -0.649761655 | 0.515846191 | 0.671096242 |
| ENSG00000159069 | 441.7947898 | 0.512349431  | 0.102292908 | 5.008650566  | 5.48E-07    | 5.15E-06    |
| ENSG00000159079 | 44.89168559 | 0.135223288  | 0.260864804 | 0.518365399  | 0.604203352 | 0.741697499 |
| ENSG00000159082 | 137.8298539 | 0.287333525  | 0.168090545 | 1.709397305  | 0.08737738  | 0.188858294 |
| ENSG00000159086 | 392.9018466 | -0.066860484 | 0.103532374 | -0.645793013 | 0.518413414 | 0.673338255 |
| ENSG00000159110 | 108.4381572 | 0.16294205   | 0.172064    | 0.946985135  | 0.343646354 | 0.515506229 |
| ENSG00000159111 | 361.9872459 | 0.220572914  | 0.116992835 | 1.885354042  | 0.059382054 | 0.139604974 |
| ENSG00000159128 | 229.9605482 | 0.139245541  | 0.124135868 | 1.121718838  | 0.261982004 | 0.428312525 |
| ENSG00000159131 | 1521.956218 | -0.021098747 | 0.08440856  | -0.249959797 | 0.802618439 | 0.88267292  |
| ENSG00000159140 | 3200.596651 | -0.046261    | 0.061472379 | -0.752549366 | 0.451720754 | 0.616629899 |
| ENSG00000159147 | 168.5002183 | 0.017605023  | 0.14570382  | 0.120827462  | 0.903827698 | 0.948177575 |
| ENSG00000159164 | 301.8513482 | 0.104895096  | 0.112123563 | 0.935531236  | 0.349514593 | 0.521524484 |
| ENSG00000159176 | 9.487662706 | -0.945481681 | 0.579577015 | -1.631330534 | 0.102820594 | 0.214354539 |
| ENSG00000159182 | 35.08893554 | 0.19487126   | 0.304318567 | 0.640352843  | 0.521943233 | 0.676047635 |
| ENSG00000159184 | 465.8354229 | -0.641778144 | 0.097034205 | -6.613937275 | 3.74E-11    | 6.24E-10    |
| ENSG00000159199 | 816.0130808 | 0.365199524  | 0.086262809 | 4.233568628  | 2.30E-05    | 0.000152502 |
| ENSG00000159200 | 34.68164859 | 0.084231464  | 0.304484595 | 0.27663621   | 0.782059458 | 0.869594649 |
| ENSG00000159202 | 1139.0576   | 0.013069864  | 0.069452993 | 0.18818287   | 0.8507333   | 0.914466687 |
| ENSG00000159208 | 141.0551941 | 0.375038749  | 0.163194364 | 2.29811092   | 0.021555477 | 0.061380455 |
| ENSG00000159210 | 539.9171705 | 0.230045409  | 0.091663124 | 2.50968328   | 0.012083949 | 0.037889114 |
| ENSG00000159217 | 3186.449935 | -0.199279296 | 0.056003217 | -3.558354441 | 0.000373186 | 0.001870188 |
| ENSG00000159231 | 9.644724011 | 0.480754485  | 0.581393619 | 0.826900174  | 0.408293645 | 0.576817945 |
| ENSG00000159256 | 215.1767721 | -0.082626409 | 0.131461541 | -0.62852153  | 0.529662347 | 0.682186526 |
| ENSG00000159259 | 243.7952259 | -0.286606054 | 0.130643208 | -2.193807535 | 0.028249249 | 0.07672413  |
| ENSG00000159267 | 220.5069791 | -0.498571818 | 0.133191996 | -3.743256586 | 0.000181651 | 0.000982914 |
| ENSG00000159307 | 12.60391901 | 0.532802857  | 0.487978769 | 1.091856636  | 0.27489612  | 0.443286167 |
| ENSG00000159314 | 174.622873  | 0.086542711  | 0.144322224 | 0.599649238  | 0.548740025 | 0.697002544 |
| ENSG00000159322 | 362.9410562 | 0.325176721  | 0.106745526 | 3.04627961   | 0.002316923 | 0.009259122 |



|                 |             |              |             |              |             |             |
|-----------------|-------------|--------------|-------------|--------------|-------------|-------------|
| ENSG00000159335 | 2595.373071 | 0.133508951  | 0.143530564 | 0.930177848  | 0.352279009 | 0.523715899 |
| ENSG00000159346 | 1240.635907 | 0.018871434  | 0.076706835 | 0.246020235  | 0.805666569 | 0.885189466 |
| ENSG00000159348 | 67.82841656 | 0.954569909  | 0.214773535 | 4.444541598  | 8.81E-06    | 6.39E-05    |
| ENSG00000159352 | 1153.583728 | 0.440605229  | 0.08610598  | 5.117010769  | 3.10E-07    | 3.02E-06    |
| ENSG00000159363 | 185.3185848 | -0.061830306 | 0.14944147  | -0.413742627 | 0.679062605 | 0.796492352 |
| ENSG00000159377 | 1226.095983 | 0.534100758  | 0.077165667 | 6.921481752  | 4.47E-12    | 8.24E-11    |
| ENSG00000159388 | 240.4963724 | -0.207678136 | 0.128963726 | -1.610360861 | 0.1073191   | 0.221758075 |
| ENSG00000159399 | 410.9129227 | 0.425338272  | 0.096386902 | 4.412822298  | 1.02E-05    | 7.31E-05    |
| ENSG00000159403 | 36.3841266  | 0.556516944  | 0.304195239 | 1.829472891  | 0.067328797 | 0.154360635 |
| ENSG00000159423 | 47.94507971 | -0.683150076 | 0.259062653 | -2.637007185 | 0.008364106 | 0.027808425 |
| ENSG00000159433 | 314.0272782 | -0.33485224  | 0.127611537 | -2.623996604 | 0.008690465 | 0.028667817 |
| ENSG00000159459 | 317.0857105 | 0.046087132  | 0.112385076 | 0.410082317  | 0.681745564 | 0.79850579  |
| ENSG00000159461 | 393.1325314 | 0.244948045  | 0.102887937 | 2.380726563  | 0.017278532 | 0.051280698 |
| ENSG00000159479 | 170.5176862 | 0.176718133  | 0.147579037 | 1.19744739   | 0.231132222 | 0.390558682 |
| ENSG00000159556 | 171.6728791 | 0.595068075  | 0.137855375 | 4.31661134   | 1.58E-05    | 0.000108674 |
| ENSG00000159579 | 226.5004839 | -0.188449471 | 0.122718333 | -1.535626065 | 0.124630118 | 0.248869878 |
| ENSG00000159588 | 25.55895838 | -0.081083458 | 0.351270043 | -0.230829412 | 0.81744733  | 0.892507031 |
| ENSG00000159592 | 554.8200888 | -0.014671729 | 0.097561379 | -0.150384595 | 0.880461195 | 0.934116144 |
| ENSG00000159593 | 365.7400628 | 0.041909483  | 0.1078199   | 0.388698959  | 0.697498853 | 0.810201471 |
| ENSG00000159596 | 320.607695  | 0.047485266  | 0.115466505 | 0.411247104  | 0.680891352 | 0.797904464 |
| ENSG00000159640 | 126.2667212 | 0.573093578  | 0.161655757 | 3.545147957  | 0.000392393 | 0.001952402 |
| ENSG00000159658 | 494.8621198 | -0.262451797 | 0.100316236 | -2.61624447  | 0.008890288 | 0.029224957 |
| ENSG00000159674 | 8.595464721 | -0.026905361 | 0.595282287 | -0.045197651 | 0.963949766 | 0.981105184 |
| ENSG00000159685 | 156.4437208 | -0.06505     | 0.153095483 | -0.42489823  | 0.670910865 | 0.79003143  |
| ENSG00000159692 | 735.3026755 | -0.041926832 | 0.080440357 | -0.521216384 | 0.602216042 | 0.740357846 |
| ENSG00000159714 | 62.14486896 | -0.147989935 | 0.225802462 | -0.655395575 | 0.512213099 | 0.668188838 |
| ENSG00000159720 | 288.5537395 | 0.210836119  | 0.113000119 | 1.865804388  | 0.062068738 | 0.144686287 |
| ENSG00000159733 | 28.73079086 | 0.088798163  | 0.32483518  | 0.273363749  | 0.784573616 | 0.871011269 |
| ENSG00000159753 | 59.75435141 | -0.949285333 | 0.250805696 | -3.784943277 | 0.000153744 | 0.000847249 |
| ENSG00000159761 | 12.65657004 | 0.105740254  | 0.527547339 | 0.20043747   | 0.841138457 | 0.907697202 |
| ENSG00000159788 | 314.3682253 | 0.303039181  | 0.11771864  | 2.57426675   | 0.010045279 | 0.032393489 |
| ENSG00000159792 | 130.1708059 | -0.748246479 | 0.167110449 | -4.477556507 | 7.55E-06    | 5.56E-05    |
| ENSG00000159840 | 833.2378688 | 0.387306851  | 0.07837497  | 4.941716081  | 7.74E-07    | 7.04E-06    |
| ENSG00000159842 | 773.0533325 | 0.117916765  | 0.079175535 | 1.489308087  | 0.136406259 | 0.265918808 |
| ENSG00000159873 | 325.0616409 | 0.150012566  | 0.10684249  | 1.404053448  | 0.160302934 | 0.299330957 |
| ENSG00000159882 | 17.84706016 | 0.417129022  | 0.413267646 | 1.009343524  | 0.312809913 | 0.484076461 |
| ENSG00000159884 | 64.24468477 | -0.13327717  | 0.229471327 | -0.580800975 | 0.561374598 | 0.707739093 |
| ENSG00000159899 | 49.98102737 | -0.215252788 | 0.249252492 | -0.863593323 | 0.387811333 | 0.556525506 |
| ENSG00000159905 | 32.53445087 | 0.822720683  | 0.332647575 | 2.473250201  | 0.013389037 | 0.041380814 |
| ENSG00000159915 | 10.93966804 | -0.631661684 | 0.527483852 | -1.197499567 | 0.231111896 | 0.390558682 |
| ENSG00000159917 | 56.54383144 | 0.139393099  | 0.240955114 | 0.578502349  | 0.562925012 | 0.709057357 |
| ENSG00000159921 | 539.3966085 | -0.091713613 | 0.096214777 | -0.953217534 | 0.340479864 | 0.512233121 |
| ENSG00000159958 | 69.60992888 | 0.398773216  | 0.220882123 | 1.805366637  | 0.071017328 | 0.16084818  |
| ENSG00000160007 | 1078.282877 | -0.232857801 | 0.071915028 | -3.237957454 | 0.001203888 | 0.005270379 |
| ENSG00000160014 | 2020.028826 | -0.281602132 | 0.062159418 | -4.530321274 | 5.89E-06    | 4.45E-05    |
| ENSG00000160049 | 1037.650094 | -0.062980165 | 0.075441774 | -0.834818184 | 0.403820086 | 0.571993621 |
| ENSG00000160050 | 243.6885773 | -0.34471634  | 0.123861871 | -2.783070674 | 0.005384708 | 0.019038255 |
| ENSG00000160051 | 31.24668516 | -0.120330403 | 0.315332739 | -0.381598191 | 0.702759426 | 0.814023391 |
| ENSG00000160055 | 36.47947462 | -0.38506375  | 0.297584042 | -1.293966396 | 0.195677028 | 0.346923541 |
| ENSG00000160058 | 259.4872889 | 0.130801392  | 0.122227445 | 1.070147479  | 0.284552931 | 0.454166006 |

|                 |             |              |             |              |             |             |
|-----------------|-------------|--------------|-------------|--------------|-------------|-------------|
| ENSG00000160062 | 80.48331931 | 0.004600198  | 0.204873801 | 0.022453815  | 0.982085953 | 0.990903705 |
| ENSG00000160072 | 258.1375986 | 0.637809649  | 0.125913941 | 5.065441067  | 4.07E-07    | 3.91E-06    |
| ENSG00000160075 | 534.293498  | -0.096555477 | 0.09244554  | -1.044457918 | 0.296273579 | 0.466640787 |
| ENSG00000160087 | 235.1209198 | 0.379530162  | 0.137946428 | 2.75128663   | 0.005936168 | 0.020675762 |
| ENSG00000160094 | 360.9262746 | -0.535728022 | 0.1070773   | -5.003189501 | 5.64E-07    | 5.27E-06    |
| ENSG00000160097 | 38.17372562 | -1.358152214 | 0.31636449  | -4.292998281 | 1.76E-05    | 0.000119795 |
| ENSG00000160113 | 1048.493523 | 0.0334558    | 0.076059826 | 0.439861642  | 0.660037319 | 0.782606924 |
| ENSG00000160117 | 215.5596985 | 0.07399652   | 0.124390187 | 0.594874256  | 0.551927527 | 0.699430612 |
| ENSG00000160124 | 254.0710027 | 0.409819971  | 0.123765537 | 3.311260803  | 0.000928766 | 0.004209867 |
| ENSG00000160131 | 401.178373  | -0.292320874 | 0.102608861 | -2.848885301 | 0.004387269 | 0.016028081 |
| ENSG00000160161 | 288.0638906 | 0.068642491  | 0.122145293 | 0.561974098  | 0.574133667 | 0.718419883 |
| ENSG00000160179 | 132.1372467 | 0.745894291  | 0.159540536 | 4.675265055  | 2.94E-06    | 2.36E-05    |
| ENSG00000160188 | 21.98552515 | -0.228229109 | 0.368354785 | -0.619590456 | 0.535527452 | 0.686364427 |
| ENSG00000160190 | 50.43312609 | -0.753445682 | 0.255576809 | -2.94802054  | 0.003198158 | 0.012201121 |
| ENSG00000160191 | 7.806189479 | -3.306254076 | 0.875756506 | -3.775312032 | 0.000159807 | 0.000877224 |
| ENSG00000160193 | 230.9941038 | 0.295092383  | 0.124617065 | 2.36799336   | 0.017884857 | 0.052690559 |
| ENSG00000160194 | 793.245318  | 0.072314352  | 0.07959084  | 0.908576307  | 0.363573818 | 0.534581748 |
| ENSG00000160199 | 114.7563025 | 0.134852719  | 0.168442134 | 0.800587807  | 0.423370312 | 0.590574257 |
| ENSG00000160200 | 27.98446057 | -0.133146322 | 0.332503482 | -0.400435872 | 0.688835508 | 0.804194845 |
| ENSG00000160201 | 40.22233647 | -0.156589234 | 0.280319334 | -0.558610181 | 0.57642779  | 0.720573211 |
| ENSG00000160207 | 7.869197413 | 0.368712016  | 0.625395454 | 0.589566192  | 0.555481523 | 0.702516337 |
| ENSG00000160208 | 1228.815245 | 0.112130381  | 0.0677883   | 1.654125882  | 0.098101938 | 0.206633367 |
| ENSG00000160209 | 530.0076409 | 0.354111357  | 0.094876791 | 3.732328564  | 0.000189718 | 0.001021451 |
| ENSG00000160211 | 647.5342451 | 0.284478434  | 0.08248048  | 3.4490395    | 0.000562584 | 0.002687622 |
| ENSG00000160213 | 1686.321059 | 0.581492565  | 0.064580278 | 9.004181814  | 2.17E-19    | 7.13E-18    |
| ENSG00000160214 | 471.7513676 | 0.352424599  | 0.09617734  | 3.664320501  | 0.000247996 | 0.001296465 |
| ENSG00000160216 | 364.2901847 | 0.503198327  | 0.102125929 | 4.927233782  | 8.34E-07    | 7.52E-06    |
| ENSG00000160218 | 219.5871198 | -0.058483237 | 0.135394842 | -0.431945824 | 0.665780789 | 0.786165328 |
| ENSG00000160221 | 36.95462801 | -0.052995746 | 0.308660743 | -0.171695775 | 0.863676707 | 0.922941553 |
| ENSG00000160226 | 35.28342534 | -0.000337855 | 0.314270596 | -0.001075045 | 0.999142238 | 0.999711591 |
| ENSG00000160233 | 135.7683535 | 0.489485587  | 0.165220226 | 2.962625091  | 0.003050278 | 0.011716506 |
| ENSG00000160256 | 214.3760924 | 0.675874341  | 0.137305132 | 4.922425907  | 8.55E-07    | 7.68E-06    |
| ENSG00000160271 | 70.370763   | 0.359616826  | 0.211912801 | 1.697003794  | 0.089695943 | 0.192820763 |
| ENSG00000160285 | 507.0524764 | -0.431697459 | 0.09067282  | -4.761045935 | 1.93E-06    | 1.61E-05    |
| ENSG00000160293 | 209.2937076 | 0.235879434  | 0.131458908 | 1.794320662  | 0.072762002 | 0.163664987 |
| ENSG00000160294 | 867.0375925 | -0.104922639 | 0.076134494 | -1.378122238 | 0.168165551 | 0.310450978 |
| ENSG00000160298 | 94.43127437 | -0.400941184 | 0.192373483 | -2.084181132 | 0.037143694 | 0.095946575 |
| ENSG00000160299 | 1094.070664 | 0.053496548  | 0.074852858 | 0.714689455  | 0.474800955 | 0.63590048  |
| ENSG00000160305 | 347.5620441 | 0.28946205   | 0.109965561 | 2.632297315  | 0.008480961 | 0.028137    |
| ENSG00000160310 | 180.245565  | 0.205490783  | 0.134283201 | 1.530279154  | 0.125947646 | 0.250907557 |
| ENSG00000160318 | 17.57101808 | 0.033245562  | 0.419598271 | 0.079231886  | 0.936848183 | 0.965368723 |
| ENSG00000160323 | 46.2060633  | -0.096955062 | 0.258018932 | -0.375767239 | 0.707089945 | 0.816145642 |
| ENSG00000160325 | 9.267973741 | -1.019639154 | 0.605038264 | -1.685247389 | 0.091940852 | 0.196574299 |
| ENSG00000160326 | 75.02298991 | 0.187523733  | 0.215463658 | 0.870326509  | 0.384121996 | 0.553241226 |
| ENSG00000160336 | 106.381381  | 0.301161596  | 0.172006973 | 1.750868526  | 0.079968559 | 0.176455915 |
| ENSG00000160345 | 31.43883392 | 0.24479451   | 0.311061111 | 0.786965973  | 0.431301785 | 0.597602701 |
| ENSG00000160360 | 439.3403618 | 0.419158035  | 0.10112401  | 4.14499023   | 3.40E-05    | 0.000217475 |
| ENSG00000160392 | 75.15481845 | 0.098961971  | 0.219080762 | 0.451714566  | 0.651474624 | 0.776056991 |
| ENSG00000160404 | 89.06919406 | 0.421487112  | 0.200917842 | 2.097808278  | 0.035922085 | 0.093461294 |
| ENSG00000160408 | 13.28130668 | 0.759431421  | 0.483851966 | 1.569553239  | 0.116519085 | 0.235990463 |

|                 |             |              |             |              |             |             |
|-----------------|-------------|--------------|-------------|--------------|-------------|-------------|
| ENSG00000160410 | 526.2646071 | -0.139351081 | 0.089578536 | -1.555630261 | 0.119796039 | 0.241543861 |
| ENSG00000160439 | 224.7208701 | 0.093859188  | 0.126556165 | 0.741640585  | 0.458305127 | 0.622131051 |
| ENSG00000160445 | 283.2215103 | -0.17384814  | 0.114103349 | -1.523602435 | 0.127608055 | 0.252943916 |
| ENSG00000160446 | 107.6771815 | -0.215802868 | 0.189587907 | -1.138273382 | 0.255006345 | 0.420283249 |
| ENSG00000160447 | 243.2223904 | 0.145640966  | 0.124237751 | 1.17227626   | 0.24108616  | 0.403558929 |
| ENSG00000160460 | 259.4776387 | 0.477305473  | 0.117855091 | 4.049935127  | 5.12E-05    | 0.000314396 |
| ENSG00000160469 | 137.7985575 | -0.187965811 | 0.161384962 | -1.16470462  | 0.244138578 | 0.407293897 |
| ENSG00000160539 | 114.0956399 | -0.192377256 | 0.174019793 | -1.105490661 | 0.268947039 | 0.436196635 |
| ENSG00000160551 | 1463.286868 | -0.227730789 | 0.067867871 | -3.355502168 | 0.00079221  | 0.003644133 |
| ENSG00000160563 | 68.8520867  | 0.173222035  | 0.210940824 | 0.821187816  | 0.411539295 | 0.579886898 |
| ENSG00000160570 | 136.6871323 | -0.008829059 | 0.155838146 | -0.056655315 | 0.954819771 | 0.975656748 |
| ENSG00000160584 | 603.9374173 | -0.145948241 | 0.088885876 | -1.641973367 | 0.100595524 | 0.210590957 |
| ENSG00000160602 | 33.89839514 | -0.252592761 | 0.301138764 | -0.838791917 | 0.401586087 | 0.569921173 |
| ENSG00000160606 | 110.6680213 | -0.282613629 | 0.179213041 | -1.576970223 | 0.114802377 | 0.233511293 |
| ENSG00000160613 | 371.8303289 | 0.339676721  | 0.106638275 | 3.185317088  | 0.001445955 | 0.006192478 |
| ENSG00000160633 | 1433.994602 | 0.185191242  | 0.071966009 | 2.573315433  | 0.010072936 | 0.032475219 |
| ENSG00000160678 | 124.212649  | -1.320923169 | 0.173837454 | -7.598610879 | 2.99E-14    | 6.87E-13    |
| ENSG00000160679 | 830.5752933 | 0.004883383  | 0.087341074 | 0.055911649  | 0.955412191 | 0.976091797 |
| ENSG00000160685 | 351.9107709 | 0.177862661  | 0.118666379 | 1.498846277  | 0.133913516 | 0.262427896 |
| ENSG00000160688 | 436.939407  | 0.032808845  | 0.098888214 | 0.331777105  | 0.740057573 | 0.840999008 |
| ENSG00000160691 | 1889.647315 | -0.075196942 | 0.06252895  | -1.202594013 | 0.229133465 | 0.387901845 |
| ENSG00000160695 | 269.1427456 | -0.02689018  | 0.117585638 | -0.228685919 | 0.81911304  | 0.893395096 |
| ENSG00000160703 | 48.03414216 | -0.370125541 | 0.256035062 | -1.445604902 | 0.148288051 | 0.282483689 |
| ENSG00000160710 | 3136.933881 | 0.196100145  | 0.059913319 | 3.273064292  | 0.001063883 | 0.004750274 |
| ENSG00000160712 | 17.3699051  | 0.971051699  | 0.429271086 | 2.262094352  | 0.023691575 | 0.066254339 |
| ENSG00000160714 | 769.4853736 | 0.086514948  | 0.083895126 | 1.031227339  | 0.302434223 | 0.473083912 |
| ENSG00000160741 | 638.5615383 | 0.19331047   | 0.085661544 | 2.256677394  | 0.02402824  | 0.067062327 |
| ENSG00000160746 | 129.0325632 | -0.219257664 | 0.160322444 | -1.3676043   | 0.17143597  | 0.314504514 |
| ENSG00000160752 | 1764.090943 | 0.134770191  | 0.067521244 | 1.99596724   | 0.045937489 | 0.114048057 |
| ENSG00000160753 | 275.1649288 | -0.131929552 | 0.115949459 | -1.137819474 | 0.255195871 | 0.42044762  |
| ENSG00000160767 | 944.0307698 | 0.357295876  | 0.183561341 | 1.946465815  | 0.05159881  | 0.124854611 |
| ENSG00000160781 | 82.93480248 | -0.197101327 | 0.215602619 | -0.914188    | 0.360618068 | 0.531933425 |
| ENSG00000160783 | 223.0848335 | -0.214922185 | 0.12957529  | -1.658666443 | 0.097183025 | 0.204955405 |
| ENSG00000160785 | 551.0173251 | 0.553636331  | 0.088806588 | 6.234180866  | 4.54E-10    | 6.62E-09    |
| ENSG00000160789 | 883.9027101 | 0.367279627  | 0.084729246 | 4.33474443   | 1.46E-05    | 0.000100979 |
| ENSG00000160791 | 33.96399742 | 0.101372542  | 0.297428986 | 0.340829399  | 0.733232017 | 0.835693316 |
| ENSG00000160796 | 765.7825744 | -0.070547852 | 0.081923006 | -0.861148231 | 0.389156408 | 0.557687326 |
| ENSG00000160799 | 527.1387098 | 0.19798817   | 0.087795347 | 2.25511006   | 0.024126421 | 0.06726952  |
| ENSG00000160801 | 39.16638568 | -1.540122334 | 0.306810979 | -5.019775826 | 5.17E-07    | 4.88E-06    |
| ENSG00000160803 | 724.4820169 | 0.189990254  | 0.085073868 | 2.233238695  | 0.025533208 | 0.070572793 |
| ENSG00000160813 | 51.36783507 | -0.316226486 | 0.262412003 | -1.205076298 | 0.228173849 | 0.386956182 |
| ENSG00000160818 | 1177.685835 | -0.068002537 | 0.075935299 | -0.895532617 | 0.370502438 | 0.541536387 |
| ENSG00000160867 | 87.85869012 | -0.070539369 | 0.199400073 | -0.353757989 | 0.72352026  | 0.828641589 |
| ENSG00000160877 | 1022.882287 | -0.055242193 | 0.078998113 | -0.699284966 | 0.484373961 | 0.644880533 |
| ENSG00000160888 | 420.2911296 | -0.105608072 | 0.114368353 | -0.923402929 | 0.355797266 | 0.527227053 |
| ENSG00000160908 | 160.3271472 | 0.264058874  | 0.147462631 | 1.790683318  | 0.073344128 | 0.164605363 |
| ENSG00000160917 | 214.0480431 | -0.000963468 | 0.137187833 | -0.007022985 | 0.994396514 | 0.997521091 |
| ENSG00000160932 | 1675.389027 | 1.188574359  | 0.068802152 | 17.27524964  | 7.23E-67    | 1.14E-64    |
| ENSG00000160948 | 468.5471319 | 0.721039747  | 0.103196596 | 6.987049704  | 2.81E-12    | 5.29E-11    |
| ENSG00000160949 | 348.9863147 | 0.127400555  | 0.116170307 | 1.096670558  | 0.272785431 | 0.440844104 |

|                 |             |              |             |              |             |             |
|-----------------|-------------|--------------|-------------|--------------|-------------|-------------|
| ENSG00000160951 | 14.73672888 | -1.245027178 | 0.475348388 | -2.619188808 | 0.008813915 | 0.029022284 |
| ENSG00000160953 | 478.7631684 | 0.433952656  | 0.091665216 | 4.734103923  | 2.20E-06    | 1.82E-05    |
| ENSG00000160957 | 380.0407491 | 0.556820404  | 0.105728128 | 5.266530427  | 1.39E-07    | 1.43E-06    |
| ENSG00000160959 | 106.1223267 | 0.365551613  | 0.180327212 | 2.027157245  | 0.042646334 | 0.107701599 |
| ENSG00000160961 | 116.0032724 | 0.55674951   | 0.170763279 | 3.260358511  | 0.001112715 | 0.004936925 |
| ENSG00000160963 | 103.2865831 | -4.119381075 | 0.312922778 | -13.16420973 | 1.41E-39    | 1.08E-37    |
| ENSG00000160972 | 453.6165701 | 0.411982477  | 0.094839123 | 4.344014011  | 1.40E-05    | 9.73E-05    |
| ENSG00000160991 | 276.421708  | -0.027041045 | 0.116787417 | -0.231540742 | 0.816894738 | 0.89236491  |
| ENSG00000160993 | 99.73884769 | 0.014682122  | 0.176987851 | 0.082955537  | 0.933886894 | 0.963943655 |
| ENSG00000160999 | 62.74998505 | 0.639624772  | 0.223354157 | 2.863724499  | 0.00418692  | 0.015404312 |
| ENSG00000161010 | 164.5968257 | -0.340872738 | 0.151782786 | -2.245793129 | 0.024717262 | 0.068617268 |
| ENSG00000161011 | 1328.606357 | 0.433955382  | 0.067040602 | 6.473023316  | 9.61E-11    | 1.52E-09    |
| ENSG00000161013 | 427.1649542 | 0.248566759  | 0.104298718 | 2.383219697  | 0.017161949 | 0.051042535 |
| ENSG00000161016 | 16163.49516 | 0.370188868  | 0.054506458 | 6.791651472  | 1.11E-11    | 1.95E-10    |
| ENSG00000161021 | 704.7534289 | -0.192859616 | 0.081795186 | -2.357835775 | 0.018381823 | 0.053894691 |
| ENSG00000161036 | 227.9758225 | 0.120493747  | 0.12268446  | 0.982143517  | 0.326029149 | 0.498175945 |
| ENSG00000161048 | 40.60509204 | -0.291212682 | 0.272863941 | -1.06724502  | 0.285861208 | 0.455529483 |
| ENSG00000161057 | 537.1640098 | 1.045706516  | 0.094779178 | 11.03308274  | 2.65E-28    | 1.35E-26    |
| ENSG00000161082 | 8.097311742 | -1.95342872  | 0.70225807  | -2.781639404 | 0.00540851  | 0.019098375 |
| ENSG00000161091 | 359.483163  | -0.085189774 | 0.106299737 | -0.801410951 | 0.422893778 | 0.59010551  |
| ENSG00000161179 | 188.5665071 | 0.373633922  | 0.166062393 | 2.249961087  | 0.024451416 | 0.06802454  |
| ENSG00000161180 | 30.60738571 | 1.225894584  | 0.324120121 | 3.782223028  | 0.000155434 | 0.000855222 |
| ENSG00000161202 | 702.2962168 | -0.314924924 | 0.080187982 | -3.927333207 | 8.59E-05    | 0.000502515 |
| ENSG00000161203 | 757.1701032 | -0.121122117 | 0.100029582 | -1.210862969 | 0.225947927 | 0.384346812 |
| ENSG00000161204 | 118.0832434 | -0.112373441 | 0.174238661 | -0.644939767 | 0.51896622  | 0.673862508 |
| ENSG00000161217 | 270.7342727 | 0.066626914  | 0.13093763  | 0.508844663  | 0.61086111  | 0.746967107 |
| ENSG00000161243 | 201.5381909 | -1.571410219 | 0.139820575 | -11.23876242 | 2.63E-29    | 1.39E-27    |
| ENSG00000161249 | 183.9709404 | -2.895538702 | 0.173456599 | -16.69315967 | 1.47E-62    | 2.11E-60    |
| ENSG00000161265 | 25.49858265 | -0.129420219 | 0.357968714 | -0.361540587 | 0.71769537  | 0.824088015 |
| ENSG00000161277 | 50.89465114 | 0.018375857  | 0.24673742  | 0.074475355  | 0.94063215  | 0.967262249 |
| ENSG00000161298 | 129.0178324 | -0.251628996 | 0.160080261 | -1.571892712 | 0.115975435 | 0.235114293 |
| ENSG00000161328 | 83.46821523 | -0.110257448 | 0.208678016 | -0.52836159  | 0.597248392 | 0.736571392 |
| ENSG00000161381 | 21.49494548 | -3.115415434 | 0.516556084 | -6.031127174 | 1.63E-09    | 2.21E-08    |
| ENSG00000161395 | 30.88413745 | 0.14164639   | 0.314347863 | 0.450603956  | 0.652275015 | 0.776549465 |
| ENSG00000161405 | 29.34281756 | -0.044345839 | 0.323524503 | -0.137071038 | 0.890974645 | 0.94027635  |
| ENSG00000161509 | 28.82816594 | -1.463097937 | 0.360043205 | -4.063673237 | 4.83E-05    | 0.000298794 |
| ENSG00000161513 | 212.5091049 | -0.552586116 | 0.128877081 | -4.287698896 | 1.81E-05    | 0.000122215 |
| ENSG00000161526 | 509.5892969 | 0.017814739  | 0.093554286 | 0.190421413  | 0.848978919 | 0.913349688 |
| ENSG00000161533 | 742.1103813 | -0.511814229 | 0.079955832 | -6.401211966 | 1.54E-10    | 2.38E-09    |
| ENSG00000161542 | 373.7355144 | 0.156054806  | 0.104828327 | 1.488670191  | 0.136574238 | 0.266121799 |
| ENSG00000161547 | 1389.198622 | 0.026680542  | 0.070379849 | 0.37909348   | 0.704618448 | 0.814832908 |
| ENSG00000161558 | 91.30292298 | -0.149283932 | 0.189535791 | -0.787629245 | 0.430913603 | 0.597477385 |
| ENSG00000161618 | 107.2413533 | -0.162846845 | 0.173713587 | -0.937444495 | 0.348529962 | 0.520494777 |
| ENSG00000161638 | 435.3407223 | 0.086755815  | 0.096949012 | 0.894860231  | 0.370861808 | 0.541865594 |
| ENSG00000161642 | 397.6081019 | -0.342741384 | 0.098571729 | -3.477075919 | 0.000506914 | 0.002451162 |
| ENSG00000161647 | 38.45231648 | 0.228079478  | 0.292409897 | 0.779999171  | 0.435391363 | 0.601607562 |
| ENSG00000161653 | 15.49734244 | -1.099398989 | 0.454345909 | -2.419740045 | 0.015531606 | 0.046914605 |
| ENSG00000161654 | 211.9167578 | 0.169397547  | 0.137568718 | 1.231366766  | 0.218185721 | 0.375181151 |
| ENSG00000161671 | 266.2222859 | 0.435643361  | 0.128687085 | 3.38529201   | 0.000711026 | 0.003317097 |
| ENSG00000161677 | 63.31053671 | 0.923355121  | 0.239336913 | 3.857972046  | 0.000114332 | 0.000651    |

|                 |             |              |             |              |             |             |
|-----------------|-------------|--------------|-------------|--------------|-------------|-------------|
| ENSG00000161681 | 140.343071  | -0.147264867 | 0.155230111 | -0.948687509 | 0.342779569 | 0.514590639 |
| ENSG00000161682 | 30.43328477 | 0.252678827  | 0.317846175 | 0.794972056  | 0.426629757 | 0.593882489 |
| ENSG00000161692 | 273.3539138 | -0.070541406 | 0.113999062 | -0.618789354 | 0.536055136 | 0.686852732 |
| ENSG00000161714 | 92.59339135 | -0.235272224 | 0.193141368 | -1.218134814 | 0.223172746 | 0.381561291 |
| ENSG00000161791 | 173.6574687 | -0.005621581 | 0.138805578 | -0.04049968  | 0.967694762 | 0.982949477 |
| ENSG00000161800 | 443.1394821 | 0.08465844   | 0.097856897 | 0.865124919  | 0.386970229 | 0.555798629 |
| ENSG00000161813 | 796.4341311 | -0.186582646 | 0.077398412 | -2.410677951 | 0.015922902 | 0.047925648 |
| ENSG00000161835 | 50.60101014 | 1.203401182  | 0.252363405 | 4.76852491   | 1.86E-06    | 1.55E-05    |
| ENSG00000161847 | 398.2686344 | 0.206967364  | 0.111286826 | 1.859765178  | 0.062918756 | 0.146182561 |
| ENSG00000161888 | 183.7851403 | -0.17132015  | 0.144921756 | -1.182156182 | 0.237143735 | 0.39851155  |
| ENSG00000161904 | 223.067539  | 0.05258236   | 0.124419161 | 0.422622684  | 0.672570574 | 0.791282788 |
| ENSG00000161914 | 38.93100416 | 0.158817604  | 0.281933223 | 0.563316387  | 0.573219462 | 0.717878752 |
| ENSG00000161920 | 64.59360232 | -0.195715536 | 0.233725365 | -0.837373967 | 0.402382394 | 0.570658715 |
| ENSG00000161921 | 524.6348691 | 0.648354943  | 0.091618626 | 7.076671794  | 1.48E-12    | 2.89E-11    |
| ENSG00000161940 | 25.82132296 | 1.552849032  | 0.373616807 | 4.156261186  | 3.23E-05    | 0.000207876 |
| ENSG00000161956 | 60.19107659 | 0.369929963  | 0.235413279 | 1.571406524  | 0.116088251 | 0.235309043 |
| ENSG00000161958 | 10.34724396 | 0.409741302  | 0.540211147 | 0.758483612  | 0.44816152  | 0.613280552 |
| ENSG00000161960 | 112.3799232 | 0.619661926  | 0.174197677 | 3.557234142  | 0.00037478  | 0.001875503 |
| ENSG00000161970 | 221.7993748 | 0.416385567  | 0.150277342 | 2.770780754  | 0.005592207 | 0.019672859 |
| ENSG00000161980 | 126.1412232 | 0.12224515   | 0.162683676 | 0.751428493  | 0.45239482  | 0.617149659 |
| ENSG00000161981 | 139.0211648 | 0.106531495  | 0.154428863 | 0.689841865  | 0.490293638 | 0.649854192 |
| ENSG00000161996 | 18.31630742 | -0.056900364 | 0.412222215 | -0.138033232 | 0.890214154 | 0.939860069 |
| ENSG00000161999 | 118.6848484 | 2.630490428  | 0.206504534 | 12.73817277  | 3.63E-37    | 2.55E-35    |
| ENSG00000162004 | 30.57969326 | -0.602493124 | 0.315603214 | -1.909020877 | 0.056259399 | 0.133763672 |
| ENSG00000162032 | 78.11823347 | 0.469314093  | 0.202076135 | 2.322461739  | 0.020208086 | 0.05826416  |
| ENSG00000162039 | 52.69880842 | 0.11066615   | 0.245251685 | 0.451235023  | 0.65182017  | 0.776271126 |
| ENSG00000162062 | 115.497645  | 0.21346283   | 0.166124259 | 1.284958811  | 0.198806678 | 0.350564914 |
| ENSG00000162063 | 377.991931  | -0.087190837 | 0.101186697 | -0.861682805 | 0.38886209  | 0.557325353 |
| ENSG00000162065 | 119.7986351 | 0.017370907  | 0.1634646   | 0.10626709   | 0.915370442 | 0.954297804 |
| ENSG00000162066 | 53.06151784 | 0.613304649  | 0.270024365 | 2.271293736  | 0.023129202 | 0.064979181 |
| ENSG00000162068 | 18.36605926 | 1.147670267  | 0.448981485 | 2.55616391   | 0.010583325 | 0.033802631 |
| ENSG00000162073 | 193.3862417 | -0.10551619  | 0.14251301  | -0.740396896 | 0.459059202 | 0.62242959  |
| ENSG00000162076 | 227.6995671 | -0.429539112 | 0.137773975 | -3.117708649 | 0.001822629 | 0.007547897 |
| ENSG00000162086 | 71.52595104 | -0.035578208 | 0.220896696 | -0.161062654 | 0.872044054 | 0.928844619 |
| ENSG00000162104 | 339.3957898 | 0.048898975  | 0.107569733 | 0.454579307  | 0.649411924 | 0.774190724 |
| ENSG00000162129 | 615.9659678 | 0.501298592  | 0.088475193 | 5.665979059  | 1.46E-08    | 1.76E-07    |
| ENSG00000162139 | 93.06606089 | -0.545386373 | 0.188702554 | -2.890190738 | 0.003850081 | 0.014315596 |
| ENSG00000162144 | 54.65711623 | 0.32204738   | 0.254223219 | 1.266789798  | 0.205230461 | 0.358682061 |
| ENSG00000162174 | 54.67863218 | -1.559028399 | 0.258999789 | -6.019419576 | 1.75E-09    | 2.37E-08    |
| ENSG00000162191 | 725.7208299 | -0.057105077 | 0.090343817 | -0.632086174 | 0.527330569 | 0.680265635 |
| ENSG00000162194 | 61.51450308 | 0.672014971  | 0.223278827 | 3.009756811  | 0.002614569 | 0.010270374 |
| ENSG00000162222 | 162.4538487 | 0.018892287  | 0.142491739 | 0.132585136  | 0.894521488 | 0.942843412 |
| ENSG00000162227 | 125.8413225 | -0.06798194  | 0.176737233 | -0.384649789 | 0.700496901 | 0.812005278 |
| ENSG00000162231 | 402.9851479 | 0.301790094  | 0.108759517 | 2.774838502  | 0.005522913 | 0.019448572 |
| ENSG00000162236 | 122.128827  | -0.070199287 | 0.162197368 | -0.432801642 | 0.665158881 | 0.785780162 |
| ENSG00000162241 | 15.41440358 | -0.655775794 | 0.474284754 | -1.382662605 | 0.166768343 | 0.308601622 |
| ENSG00000162244 | 3366.092478 | 0.264811436  | 0.074564435 | 3.551444272  | 0.000383123 | 0.001913844 |
| ENSG00000162298 | 545.2677759 | 0.437703585  | 0.093989296 | 4.656951402  | 3.21E-06    | 2.56E-05    |
| ENSG00000162300 | 158.7891781 | 0.445152522  | 0.14859372  | 2.995769406  | 0.002737534 | 0.010669849 |
| ENSG00000162302 | 216.9813274 | 0.511491152  | 0.129369117 | 3.95373458   | 7.69E-05    | 0.000454685 |

|                 |             |              |             |              |             |             |
|-----------------|-------------|--------------|-------------|--------------|-------------|-------------|
| ENSG00000162337 | 1165.213176 | 0.415341356  | 0.076406186 | 5.435965032  | 5.45E-08    | 6.00E-07    |
| ENSG00000162341 | 48.60951037 | 0.339448451  | 0.25927989  | 1.309196987  | 0.190467633 | 0.340134609 |
| ENSG00000162368 | 335.6203741 | 0.074721735  | 0.120730754 | 0.618912182  | 0.535974213 | 0.686811692 |
| ENSG00000162377 | 552.8301446 | -0.009979932 | 0.08620139  | -0.115774608 | 0.907831175 | 0.950649754 |
| ENSG00000162378 | 238.7570943 | -0.325595736 | 0.130449178 | -2.495958514 | 0.012561729 | 0.039168615 |
| ENSG00000162384 | 126.3262709 | -0.1244985   | 0.159483743 | -0.780634424 | 0.435017539 | 0.601231376 |
| ENSG00000162385 | 372.1774463 | 0.182836498  | 0.108251637 | 1.688995231  | 0.091220344 | 0.195509944 |
| ENSG00000162390 | 42.93462861 | -0.751349685 | 0.268967394 | -2.793460108 | 0.005214746 | 0.018554088 |
| ENSG00000162396 | 65.89883192 | -0.118831695 | 0.242371938 | -0.490286526 | 0.62393116  | 0.755922074 |
| ENSG00000162402 | 882.2962182 | -0.606204713 | 0.075477829 | -8.031559964 | 9.62E-16    | 2.48E-14    |
| ENSG00000162408 | 678.0003149 | 0.321137289  | 0.087490321 | 3.670546486  | 0.000242032 | 0.001268593 |
| ENSG00000162413 | 223.6937836 | -1.830729258 | 0.148506922 | -12.32756852 | 6.44E-35    | 4.17E-33    |
| ENSG00000162415 | 95.780211   | 0.117619404  | 0.18862079  | 0.623576034  | 0.532906054 | 0.684378437 |
| ENSG00000162419 | 269.0075899 | 0.302881823  | 0.114207991 | 2.652019535  | 0.008001191 | 0.026772924 |
| ENSG00000162426 | 11.22098825 | -0.194400753 | 0.508875894 | -0.382019969 | 0.702446553 | 0.813795194 |
| ENSG00000162430 | 2153.776816 | 0.104587975  | 0.06872734  | 1.521781203  | 0.128063913 | 0.253618185 |
| ENSG00000162433 | 152.4239637 | 0.409905427  | 0.149614187 | 2.73974973   | 0.006148598 | 0.021278483 |
| ENSG00000162434 | 460.7986922 | 0.725999695  | 0.097524341 | 7.444292275  | 9.75E-14    | 2.13E-12    |
| ENSG00000162437 | 350.9531709 | -0.109559673 | 0.103467444 | -1.058880642 | 0.289654141 | 0.459891889 |
| ENSG00000162441 | 210.43068   | 0.300249587  | 0.128416924 | 2.338084238  | 0.019382879 | 0.05628929  |
| ENSG00000162458 | 50.56601733 | -0.947235419 | 0.253423414 | -3.737758111 | 0.000185668 | 0.001001184 |
| ENSG00000162461 | 7.679841807 | 0.290202749  | 0.619284638 | 0.468609636  | 0.639348688 | 0.767141968 |
| ENSG00000162496 | 12.93188816 | -1.323482482 | 0.520339731 | -2.54349688  | 0.010974904 | 0.034894629 |
| ENSG00000162512 | 460.2949807 | 0.049233516  | 0.095525548 | 0.515396325  | 0.6062761   | 0.743202756 |
| ENSG00000162517 | 170.376343  | -0.03817711  | 0.140094912 | -0.272508898 | 0.785230751 | 0.871396457 |
| ENSG00000162520 | 13.9925647  | 0.397815908  | 0.47293316  | 0.841167297  | 0.400254219 | 0.568390171 |
| ENSG00000162521 | 988.1170317 | 0.572031599  | 0.07753791  | 7.377444089  | 1.61E-13    | 3.49E-12    |
| ENSG00000162522 | 144.4211505 | 0.275622957  | 0.149535048 | 1.843199715  | 0.065299856 | 0.150715902 |
| ENSG00000162526 | 10.33909999 | 0.451985379  | 0.541064606 | 0.835363049  | 0.403513328 | 0.571732068 |
| ENSG00000162542 | 119.4798136 | -0.522223457 | 0.180799294 | -2.888415356 | 0.003871882 | 0.014380838 |
| ENSG00000162545 | 8.274956806 | -6.32802683  | 1.274459672 | -4.96526251  | 6.86E-07    | 6.31E-06    |
| ENSG00000162551 | 62.95447126 | -0.719595954 | 0.234627195 | -3.066975909 | 0.002162363 | 0.008720847 |
| ENSG00000162572 | 55.93325431 | -0.045717698 | 0.233324516 | -0.195940397 | 0.844656818 | 0.909999778 |
| ENSG00000162576 | 608.8915747 | -0.006982281 | 0.100321962 | -0.069598723 | 0.944513053 | 0.969143525 |
| ENSG00000162585 | 373.5287812 | 0.510847811  | 0.126442426 | 4.040161422  | 5.34E-05    | 0.000325939 |
| ENSG00000162591 | 9.950705484 | -1.800185391 | 0.623677395 | -2.886404743 | 0.003896707 | 0.01446157  |
| ENSG00000162599 | 19.76916812 | -0.726257044 | 0.415516407 | -1.747842037 | 0.080491384 | 0.177414478 |
| ENSG00000162600 | 65.7478107  | 0.056519664  | 0.221236442 | 0.255471764  | 0.798358749 | 0.87991725  |
| ENSG00000162601 | 462.7324606 | -0.167843951 | 0.105435859 | -1.591905746 | 0.111405884 | 0.228188751 |
| ENSG00000162604 | 190.702177  | 0.129739089  | 0.137337245 | 0.944675195  | 0.344824724 | 0.516556778 |
| ENSG00000162607 | 476.9861627 | -0.234052213 | 0.092330213 | -2.534947171 | 0.011246429 | 0.035621935 |
| ENSG00000162613 | 1524.382322 | 0.058957326  | 0.073048984 | 0.807093042  | 0.419612881 | 0.587374403 |
| ENSG00000162614 | 21.94900061 | 0.142527084  | 0.383856513 | 0.371303023  | 0.710411847 | 0.818634554 |
| ENSG00000162616 | 161.4789967 | 0.838402234  | 0.145821818 | 5.749497878  | 8.95E-09    | 1.10E-07    |
| ENSG00000162623 | 307.0761773 | 0.077542394  | 0.115984598 | 0.668557677  | 0.503777678 | 0.661546699 |
| ENSG00000162627 | 250.3054219 | 1.148741065  | 0.12319387  | 9.324660906  | 1.11E-20    | 3.93E-19    |
| ENSG00000162636 | 55.52761173 | -1.587527182 | 0.265640645 | -5.976220922 | 2.28E-09    | 3.05E-08    |
| ENSG00000162642 | 231.4283433 | -0.484512874 | 0.124078758 | -3.904881708 | 9.43E-05    | 0.000546075 |
| ENSG00000162643 | 31.90746521 | -1.210793947 | 0.329063754 | -3.679511744 | 0.000233681 | 0.001228487 |
| ENSG00000162650 | 254.255553  | 0.465763824  | 0.117319818 | 3.970035352  | 7.19E-05    | 0.000426876 |

|                 |             |              |             |              |             |             |
|-----------------|-------------|--------------|-------------|--------------|-------------|-------------|
| ENSG00000162664 | 496.9591299 | -0.174571844 | 0.090055244 | -1.938497263 | 0.052562584 | 0.126841887 |
| ENSG00000162669 | 10.18821123 | -2.239507031 | 0.640070979 | -3.498841699 | 0.000467284 | 0.002279145 |
| ENSG00000162670 | 192.5295097 | -2.824013035 | 0.169651364 | -16.64597899 | 3.24E-62    | 4.50E-60    |
| ENSG00000162687 | 62.45854912 | -1.769334874 | 0.255458027 | -6.926127537 | 4.33E-12    | 8.03E-11    |
| ENSG00000162688 | 186.6892098 | -0.023143774 | 0.138506761 | -0.167094904 | 0.867295376 | 0.925611468 |
| ENSG00000162694 | 177.4093592 | -0.058517688 | 0.141755594 | -0.412806903 | 0.679748093 | 0.796830632 |
| ENSG00000162695 | 300.9059637 | 0.007599259  | 0.109090091 | 0.069660395  | 0.944463965 | 0.969143525 |
| ENSG00000162702 | 377.3694585 | 0.053310788  | 0.101416849 | 0.525660068  | 0.599124413 | 0.7377192   |
| ENSG00000162704 | 402.7472131 | -0.103267289 | 0.103553084 | -0.997240109 | 0.318647977 | 0.490203497 |
| ENSG00000162714 | 590.7297091 | -0.221817921 | 0.085770219 | -2.586188109 | 0.009704395 | 0.031474865 |
| ENSG00000162729 | 198.7927346 | 0.357798685  | 0.136306458 | 2.624957688  | 0.008665974 | 0.028617476 |
| ENSG00000162733 | 2346.518556 | -0.409178194 | 0.071010165 | -5.762248182 | 8.30E-09    | 1.03E-07    |
| ENSG00000162734 | 555.6886733 | 0.432021296  | 0.088538759 | 4.879459587  | 1.06E-06    | 9.37E-06    |
| ENSG00000162735 | 258.0083568 | -0.328806144 | 0.146771659 | -2.240256367 | 0.025074284 | 0.069443705 |
| ENSG00000162736 | 1686.1918   | 0.31727906   | 0.068891667 | 4.605478081  | 4.12E-06    | 3.20E-05    |
| ENSG00000162738 | 199.0118501 | -1.04073042  | 0.147633038 | -7.049441219 | 1.80E-12    | 3.50E-11    |
| ENSG00000162745 | 39.92751425 | -3.613370482 | 0.426049478 | -8.481105285 | 2.23E-17    | 6.32E-16    |
| ENSG00000162746 | 11.77182337 | -0.877743315 | 0.555526084 | -1.580021783 | 0.114101878 | 0.232254612 |
| ENSG00000162755 | 7.814608948 | -1.999921346 | 0.710803453 | -2.813606683 | 0.004898913 | 0.017588094 |
| ENSG00000162769 | 470.9154386 | 0.101438789  | 0.093904385 | 1.080234844  | 0.280037616 | 0.448897454 |
| ENSG00000162772 | 27.48687151 | -0.545098646 | 0.367201668 | -1.484466692 | 0.137685153 | 0.267579323 |
| ENSG00000162775 | 721.3164234 | -0.127673587 | 0.081052454 | -1.575197062 | 0.115210965 | 0.234105081 |
| ENSG00000162783 | 155.007522  | 0.264450579  | 0.152274241 | 1.736673105  | 0.082444888 | 0.180784161 |
| ENSG00000162804 | 33.61579592 | -0.060625477 | 0.30380464  | -0.199554152 | 0.841829288 | 0.908092152 |
| ENSG00000162813 | 320.6813708 | 0.542938345  | 0.109705724 | 4.949043012  | 7.46E-07    | 6.79E-06    |
| ENSG00000162814 | 14.16188468 | -1.928934749 | 0.521696702 | -3.697425617 | 0.000217797 | 0.00115536  |
| ENSG00000162819 | 213.6750918 | 0.045731709  | 0.126433513 | 0.361705592  | 0.717572048 | 0.824088015 |
| ENSG00000162825 | 45.9056501  | -0.520448072 | 0.258220966 | -2.015514384 | 0.04385078  | 0.110191756 |
| ENSG00000162836 | 253.4948045 | -0.429716278 | 0.123952983 | -3.466768355 | 0.000526756 | 0.002538366 |
| ENSG00000162849 | 136.2422114 | -0.451153562 | 0.159949725 | -2.820596051 | 0.004793452 | 0.017269459 |
| ENSG00000162851 | 249.111783  | 0.132621438  | 0.117668864 | 1.127073329  | 0.259711479 | 0.425938954 |
| ENSG00000162852 | 490.3931905 | 0.177634162  | 0.091228663 | 1.947131045  | 0.051519026 | 0.124730741 |
| ENSG00000162869 | 116.3037438 | -0.272050172 | 0.167623564 | -1.622982867 | 0.104593068 | 0.217211535 |
| ENSG00000162878 | 59.5550794  | -0.115408119 | 0.228474789 | -0.505124088 | 0.613471684 | 0.748612122 |
| ENSG00000162885 | 515.1676462 | -0.087920244 | 0.08919576  | -0.985699813 | 0.324280441 | 0.496196952 |
| ENSG00000162889 | 435.7597566 | -0.332938948 | 0.098088384 | -3.394274995 | 0.000688106 | 0.003220866 |
| ENSG00000162909 | 1335.075323 | 0.255864891  | 0.068899432 | 3.713599427  | 0.000204332 | 0.001090108 |
| ENSG00000162910 | 300.4532639 | 0.52968132   | 0.111896082 | 4.733689616  | 2.20E-06    | 1.82E-05    |
| ENSG00000162913 | 40.30870472 | 1.02229188   | 0.278891444 | 3.665554839  | 0.000246803 | 0.001290708 |
| ENSG00000162923 | 1033.735351 | 0.151619542  | 0.071986929 | 2.106209329  | 0.035186173 | 0.091818721 |
| ENSG00000162924 | 267.6330347 | -0.061980336 | 0.115185572 | -0.538091141 | 0.590514128 | 0.731670065 |
| ENSG00000162927 | 33.08627939 | 0.112944362  | 0.297137976 | 0.380107463  | 0.703865646 | 0.814364144 |
| ENSG00000162928 | 205.0406293 | 0.017054464  | 0.129828237 | 0.131361748  | 0.895489147 | 0.943302291 |
| ENSG00000162929 | 78.04258139 | -0.207821229 | 0.200810203 | -1.034913695 | 0.300709218 | 0.471067221 |
| ENSG00000162944 | 36.19678453 | 1.682487421  | 0.311113136 | 5.407960083  | 6.37E-08    | 6.94E-07    |
| ENSG00000162959 | 48.78162602 | 0.166357753  | 0.260649749 | 0.638242521  | 0.523315822 | 0.676910316 |
| ENSG00000162961 | 290.2353975 | 0.149294022  | 0.112174429 | 1.330909568  | 0.183218769 | 0.330466621 |
| ENSG00000162971 | 125.9486741 | -0.272098375 | 0.162650777 | -1.672899326 | 0.094347117 | 0.200498328 |
| ENSG00000162972 | 34.48885584 | 0.438263862  | 0.302294995 | 1.449788678  | 0.147117458 | 0.281126231 |
| ENSG00000162976 | 22.35315735 | -0.191262326 | 0.367028893 | -0.521109728 | 0.602290335 | 0.740384382 |

|                 |             |              |             |              |             |             |
|-----------------|-------------|--------------|-------------|--------------|-------------|-------------|
| ENSG00000162980 | 222.3183323 | 0.32094924   | 0.125720986 | 2.552869258  | 0.010683959 | 0.0340853   |
| ENSG00000162989 | 77.55193395 | -2.431486098 | 0.241449349 | -10.07037754 | 7.47E-24    | 3.10E-22    |
| ENSG00000162994 | 66.20129465 | -0.504103737 | 0.220911804 | -2.281923048 | 0.022493884 | 0.06344811  |
| ENSG00000162998 | 15.49520958 | -4.032899574 | 0.737236163 | -5.470295379 | 4.49E-08    | 5.00E-07    |
| ENSG00000162999 | 48.47359953 | 0.333005429  | 0.250930029 | 1.327084807  | 0.18448063  | 0.331975329 |
| ENSG00000163001 | 245.0920129 | 0.299258165  | 0.122393885 | 2.445041801  | 0.014483535 | 0.044180287 |
| ENSG00000163002 | 236.5178218 | 0.015692017  | 0.138931247 | 0.112948075  | 0.910071722 | 0.951381168 |
| ENSG00000163006 | 179.6605696 | 0.012071846  | 0.147091581 | 0.082070271  | 0.934590834 | 0.964528502 |
| ENSG00000163013 | 280.6601497 | 0.489605658  | 0.118571685 | 4.12919543   | 3.64E-05    | 0.000230966 |
| ENSG00000163026 | 152.1590112 | 0.082662268  | 0.149928153 | 0.55134587   | 0.5813966   | 0.723809106 |
| ENSG00000163029 | 1173.163909 | -0.011281401 | 0.071168447 | -0.158516886 | 0.874049516 | 0.93020483  |
| ENSG00000163040 | 113.2088832 | 0.332361595  | 0.166483492 | 1.996363669  | 0.045894352 | 0.113991285 |
| ENSG00000163041 | 144.5591943 | 0.482378534  | 0.158133737 | 3.050446685  | 0.002285012 | 0.00916288  |
| ENSG00000163050 | 16.68271848 | -1.021409853 | 0.434234794 | -2.352206384 | 0.018662417 | 0.054557955 |
| ENSG00000163053 | 60.34787143 | -0.426502799 | 0.225834293 | -1.888565254 | 0.058950107 | 0.138752035 |
| ENSG00000163069 | 144.9069309 | -0.388844572 | 0.150077243 | -2.590962929 | 0.00957078  | 0.031111821 |
| ENSG00000163071 | 50.29548806 | -0.77292563  | 0.268434115 | -2.879386732 | 0.003984494 | 0.014767859 |
| ENSG00000163093 | 17.16860615 | -0.148945993 | 0.419350496 | -0.355182584 | 0.722452811 | 0.827824018 |
| ENSG00000163104 | 311.0944976 | -0.525894968 | 0.108776704 | -4.834628628 | 1.33E-06    | 1.15E-05    |
| ENSG00000163110 | 328.1444865 | 0.31400651   | 0.11367346  | 2.762355523  | 0.005738595 | 0.020072223 |
| ENSG00000163125 | 1560.159398 | -0.064198744 | 0.072394281 | -0.886793031 | 0.37519034  | 0.545128125 |
| ENSG00000163132 | 371.3802929 | -6.42503743  | 0.310099438 | -20.7192811  | 2.32E-95    | 5.43E-93    |
| ENSG00000163138 | 75.9671842  | 0.481163655  | 0.209764797 | 2.293824614  | 0.021800575 | 0.061937868 |
| ENSG00000163141 | 12.99468117 | 0.357717537  | 0.503743907 | 0.710117844  | 0.477631062 | 0.638134946 |
| ENSG00000163155 | 78.44036659 | -0.400543871 | 0.199995064 | -2.00276878  | 0.045202112 | 0.112600474 |
| ENSG00000163156 | 161.3516855 | -0.192877102 | 0.146728779 | -1.314514456 | 0.188673136 | 0.337616758 |
| ENSG00000163159 | 624.933306  | 0.07552127   | 0.083633944 | 0.902997832  | 0.366527045 | 0.537825698 |
| ENSG00000163161 | 402.250343  | 0.066822443  | 0.100812604 | 0.662838185  | 0.507434195 | 0.664432322 |
| ENSG00000163162 | 229.0039024 | 0.343624075  | 0.134090201 | 2.562633749  | 0.010388157 | 0.033351859 |
| ENSG00000163166 | 815.4552708 | 0.050552302  | 0.0764248   | 0.661464631  | 0.50831439  | 0.665159127 |
| ENSG00000163170 | 262.0437802 | -0.045635357 | 0.117516023 | -0.388333061 | 0.697769574 | 0.81024793  |
| ENSG00000163171 | 38.8139117  | -2.771878896 | 0.35848466  | -7.732210614 | 1.06E-14    | 2.49E-13    |
| ENSG00000163191 | 424.8889766 | -0.615180375 | 0.108781683 | -5.655183461 | 1.56E-08    | 1.86E-07    |
| ENSG00000163214 | 321.8965865 | -0.2395011   | 0.106700696 | -2.244606729 | 0.02479339  | 0.068760662 |
| ENSG00000163249 | 102.575918  | -0.598370559 | 0.177333475 | -3.374267377 | 0.000740124 | 0.003431197 |
| ENSG00000163251 | 46.53964558 | -0.356139093 | 0.289030468 | -1.232185299 | 0.217879874 | 0.374930612 |
| ENSG00000163257 | 312.0629937 | -0.015112129 | 0.108745237 | -0.138968196 | 0.889475281 | 0.939574317 |
| ENSG00000163273 | 19.17063272 | 1.006058613  | 0.40182527  | 2.503721611  | 0.012289469 | 0.038456264 |
| ENSG00000163281 | 361.5281982 | 2.429713247  | 0.123853505 | 19.6176381   | 1.09E-85    | 2.26E-83    |
| ENSG00000163288 | 20.63571063 | -6.664935681 | 1.217520771 | -5.474186427 | 4.40E-08    | 4.91E-07    |
| ENSG00000163291 | 54.56583602 | 0.309264083  | 0.250612288 | 1.234033998  | 0.217190236 | 0.37397294  |
| ENSG00000163297 | 10.16286685 | -4.701425564 | 1.085255959 | -4.33208915  | 1.48E-05    | 0.00010203  |
| ENSG00000163312 | 57.6176383  | -0.092539176 | 0.238291269 | -0.388344804 | 0.697760885 | 0.81024793  |
| ENSG00000163319 | 181.0157829 | 0.087823585  | 0.135541991 | 0.647943743  | 0.517021337 | 0.671928822 |
| ENSG00000163320 | 509.8604939 | -0.183470046 | 0.102850125 | -1.783858276 | 0.074446697 | 0.166441629 |
| ENSG00000163322 | 125.5654688 | 0.123240886  | 0.159809655 | 0.77117297   | 0.440604414 | 0.60586547  |
| ENSG00000163328 | 19.79339812 | 0.104830245  | 0.385038987 | 0.272258779  | 0.785423049 | 0.871541004 |
| ENSG00000163344 | 181.88632   | -0.486556515 | 0.140891625 | -3.453409782 | 0.000553547 | 0.002651102 |
| ENSG00000163346 | 321.9634846 | -0.201264897 | 0.115734246 | -1.739026298 | 0.082030137 | 0.180127769 |
| ENSG00000163348 | 401.9401697 | -0.115047403 | 0.110130951 | -1.044641871 | 0.29618852  | 0.466587433 |



|                 |             |              |             |              |             |             |
|-----------------|-------------|--------------|-------------|--------------|-------------|-------------|
| ENSG00000163349 | 805.2160429 | -0.213178809 | 0.082770817 | -2.575531043 | 0.010008629 | 0.032297953 |
| ENSG00000163359 | 13.29765238 | 2.939113535  | 0.626186163 | 4.693673715  | 2.68E-06    | 2.18E-05    |
| ENSG00000163362 | 79.55416369 | -0.659539812 | 0.199711104 | -3.302470469 | 0.000958372 | 0.004325915 |
| ENSG00000163374 | 483.5216985 | 0.178071387  | 0.090460273 | 1.968503741  | 0.049010106 | 0.120063649 |
| ENSG00000163376 | 21.48530647 | -2.745180846 | 0.479281264 | -5.727703234 | 1.02E-08    | 1.25E-07    |
| ENSG00000163378 | 223.8251697 | 0.135455105  | 0.124484108 | 1.088131708  | 0.276536968 | 0.445050666 |
| ENSG00000163382 | 686.1738306 | 0.156556852  | 0.082067791 | 1.907652814  | 0.056436104 | 0.134093024 |
| ENSG00000163389 | 144.4395387 | -0.15676109  | 0.151264446 | -1.036337974 | 0.300044496 | 0.470406446 |
| ENSG00000163393 | 14.45313289 | -0.880228936 | 0.463279972 | -1.8999935   | 0.057433973 | 0.135866456 |
| ENSG00000163399 | 1898.249449 | -0.018667924 | 0.061781612 | -0.302159866 | 0.762530198 | 0.856780379 |
| ENSG00000163412 | 12.02988532 | 0.50679015   | 0.508348909 | 0.996933681  | 0.318796702 | 0.490350877 |
| ENSG00000163428 | 880.2198975 | 0.206693162  | 0.083225602 | 2.4835286    | 0.013008789 | 0.040380758 |
| ENSG00000163430 | 477.1387681 | -0.876690037 | 0.101649817 | -8.624610128 | 6.43E-18    | 1.90E-16    |
| ENSG00000163431 | 38.20322655 | -2.537916033 | 0.351708923 | -7.215955763 | 5.36E-13    | 1.09E-11    |
| ENSG00000163444 | 151.1271916 | -0.369122178 | 0.159094363 | -2.320146177 | 0.020332971 | 0.058573535 |
| ENSG00000163449 | 12.08494566 | -2.524322823 | 0.628585641 | -4.015877328 | 5.92E-05    | 0.000357667 |
| ENSG00000163462 | 75.63242747 | 0.678808649  | 0.220529517 | 3.078085226  | 0.002083353 | 0.008455609 |
| ENSG00000163463 | 74.94788802 | 0.756887569  | 0.212193499 | 3.566968703  | 0.000361135 | 0.001813678 |
| ENSG00000163466 | 1201.616237 | 0.272542185  | 0.068980518 | 3.951002282  | 7.78E-05    | 0.000459329 |
| ENSG00000163468 | 3966.265992 | 0.4151155    | 0.058002339 | 7.156875212  | 8.25E-13    | 1.65E-11    |
| ENSG00000163472 | 20.60415021 | 0.203435659  | 0.400578023 | 0.507855267  | 0.611554848 | 0.747517508 |
| ENSG00000163479 | 1368.538824 | 0.449487899  | 0.069684791 | 6.450301326  | 1.12E-10    | 1.76E-09    |
| ENSG00000163481 | 112.6202192 | 0.259139787  | 0.182821072 | 1.41745032   | 0.15635131  | 0.294012249 |
| ENSG00000163482 | 153.1024288 | -0.224497267 | 0.155682946 | -1.442015798 | 0.149297917 | 0.283979396 |
| ENSG00000163485 | 23.0283319  | -0.59492249  | 0.364315519 | -1.632986956 | 0.10247174  | 0.213754163 |
| ENSG00000163491 | 16.36011232 | -0.137570497 | 0.437117399 | -0.314722081 | 0.752972678 | 0.850788868 |
| ENSG00000163507 | 262.8707993 | -0.276863117 | 0.120141935 | -2.304466942 | 0.021196446 | 0.060591469 |
| ENSG00000163510 | 487.2795443 | 0.025681788  | 0.094888679 | 0.270651758  | 0.786658884 | 0.87229218  |
| ENSG00000163512 | 294.4771652 | 0.263245311  | 0.110067488 | 2.391671832  | 0.016771831 | 0.050019939 |
| ENSG00000163513 | 151.8452099 | 0.062261275  | 0.152157793 | 0.409188864  | 0.682401066 | 0.799073672 |
| ENSG00000163516 | 325.0261279 | 0.036779345  | 0.115811073 | 0.317580559  | 0.750803123 | 0.848952062 |
| ENSG00000163517 | 44.04844772 | -0.241655661 | 0.262357782 | -0.921092026 | 0.357002383 | 0.528264244 |
| ENSG00000163520 | 36.32741701 | -2.160681367 | 0.340317329 | -6.34901952  | 2.17E-10    | 3.29E-09    |
| ENSG00000163521 | 19.08028678 | -0.665541477 | 0.400037851 | -1.663696261 | 0.096173144 | 0.20348609  |
| ENSG00000163527 | 1155.538474 | 0.261380391  | 0.074185501 | 3.523335254  | 0.000426152 | 0.002100406 |
| ENSG00000163528 | 192.4754332 | -0.047406905 | 0.139118488 | -0.34076639  | 0.733279455 | 0.835693316 |
| ENSG00000163531 | 76.06370805 | 0.121044797  | 0.20864694  | 0.580141734  | 0.561819042 | 0.708172298 |
| ENSG00000163535 | 374.778362  | -0.148433933 | 0.104951398 | -1.414311165 | 0.15727056  | 0.295273461 |
| ENSG00000163536 | 19.46020244 | -0.307492463 | 0.395991922 | -0.776511958 | 0.437446763 | 0.603314879 |
| ENSG00000163539 | 466.5214444 | -0.192633152 | 0.103762721 | -1.856477459 | 0.063385533 | 0.147169683 |
| ENSG00000163541 | 498.6700709 | 0.008693703  | 0.110133129 | 0.078938131  | 0.937081833 | 0.965538657 |
| ENSG00000163545 | 22.58704541 | -1.510182776 | 0.39384804  | -3.834430094 | 0.000125856 | 0.000709998 |
| ENSG00000163558 | 330.1567737 | -0.030284678 | 0.107499916 | -0.281718158 | 0.77815963  | 0.867249153 |
| ENSG00000163577 | 144.3809046 | 0.217105293  | 0.148854861 | 1.458503218  | 0.144701889 | 0.277681343 |
| ENSG00000163584 | 1668.145061 | 0.455911545  | 0.080368298 | 5.672778372  | 1.40E-08    | 1.69E-07    |
| ENSG00000163590 | 77.2653227  | -0.325324917 | 0.205349789 | -1.584247635 | 0.113137377 | 0.230994293 |
| ENSG00000163596 | 109.7078776 | -0.182432799 | 0.175548542 | -1.039215688 | 0.298704436 | 0.469182736 |
| ENSG00000163597 | 1256.599853 | 0.007598548  | 0.073855745 | 0.102883642  | 0.918055321 | 0.955355281 |
| ENSG00000163602 | 224.1498072 | 0.023053399  | 0.124841177 | 0.184661819  | 0.853494295 | 0.916032577 |
| ENSG00000163605 | 253.8705783 | 0.08037145   | 0.125813928 | 0.63881202   | 0.522945228 | 0.676628438 |

|                 |             |              |             |              |             |             |
|-----------------|-------------|--------------|-------------|--------------|-------------|-------------|
| ENSG00000163607 | 105.7220804 | -0.267270569 | 0.178706141 | -1.495586933 | 0.13476133  | 0.26350117  |
| ENSG00000163608 | 212.1831312 | 0.063546468  | 0.128928381 | 0.492881918  | 0.622096024 | 0.754883986 |
| ENSG00000163611 | 26.87738046 | -0.212046063 | 0.335518401 | -0.631995332 | 0.527389927 | 0.680279734 |
| ENSG00000163617 | 28.98308464 | -0.628407399 | 0.335531583 | -1.872871081 | 0.061086189 | 0.142893872 |
| ENSG00000163624 | 14.71112862 | 2.077008513  | 0.511543674 | 4.060276016  | 4.90E-05    | 0.000302642 |
| ENSG00000163625 | 896.9797308 | 0.002291722  | 0.080430775 | 0.028493104  | 0.977268868 | 0.988629033 |
| ENSG00000163626 | 147.6802113 | -0.265192825 | 0.160347762 | -1.653860468 | 0.098155866 | 0.20671596  |
| ENSG00000163629 | 683.9602387 | -0.08939206  | 0.092252377 | -0.968994653 | 0.332547857 | 0.504950789 |
| ENSG00000163634 | 291.2497318 | 0.18114266   | 0.118377836 | 1.53020756   | 0.125965361 | 0.250907557 |
| ENSG00000163635 | 736.0635488 | 0.124342456  | 0.082043916 | 1.515559751  | 0.129630711 | 0.256179318 |
| ENSG00000163636 | 498.4813057 | 0.473703701  | 0.093744706 | 5.053124842  | 4.35E-07    | 4.15E-06    |
| ENSG00000163644 | 103.1547464 | 0.041593572  | 0.179366484 | 0.231891551  | 0.816622247 | 0.892216525 |
| ENSG00000163655 | 673.6093373 | -0.003741297 | 0.085536568 | -0.04373915  | 0.965112332 | 0.981675085 |
| ENSG00000163659 | 135.2637283 | -0.008380187 | 0.159422028 | -0.052566054 | 0.958077665 | 0.977492516 |
| ENSG00000163660 | 744.5610353 | 0.081834661  | 0.084767458 | 0.965401849  | 0.334343576 | 0.506145512 |
| ENSG00000163681 | 793.7367251 | -0.070252964 | 0.084591782 | -0.83049396  | 0.406259561 | 0.57446427  |
| ENSG00000163682 | 1787.638287 | 0.220563761  | 0.079158872 | 2.786342909  | 0.005330645 | 0.018880375 |
| ENSG00000163683 | 31.29336125 | -0.097199278 | 0.324669805 | -0.299378865 | 0.764650987 | 0.858254288 |
| ENSG00000163684 | 72.63433039 | -0.254331747 | 0.20509055  | -1.240094905 | 0.214940293 | 0.371008393 |
| ENSG00000163686 | 70.36044395 | -0.337259513 | 0.212935011 | -1.58386125  | 0.113225297 | 0.231106619 |
| ENSG00000163689 | 8.703986327 | -1.900538214 | 0.655972459 | -2.897283548 | 0.003764094 | 0.014024994 |
| ENSG00000163694 | 63.32804209 | -1.277007223 | 0.253418641 | -5.039121116 | 4.68E-07    | 4.43E-06    |
| ENSG00000163697 | 169.5405648 | -0.73865601  | 0.14315639  | -5.159783726 | 2.47E-07    | 2.45E-06    |
| ENSG00000163702 | 42.54514374 | 0.49702984   | 0.270334949 | 1.838570415  | 0.065978396 | 0.151934185 |
| ENSG00000163703 | 37.18328734 | 0.333150527  | 0.288662913 | 1.154116141  | 0.248452557 | 0.412677435 |
| ENSG00000163704 | 126.1781437 | -0.819615063 | 0.170560449 | -4.805422743 | 1.54E-06    | 1.31E-05    |
| ENSG00000163710 | 173.1699914 | 1.042643182  | 0.146477897 | 7.11809223   | 1.09E-12    | 2.17E-11    |
| ENSG00000163714 | 1505.439267 | 0.025757434  | 0.066214738 | 0.38899851   | 0.697277248 | 0.810027539 |
| ENSG00000163719 | 279.8409919 | 0.183736753  | 0.116308348 | 1.579738309  | 0.114166809 | 0.232353109 |
| ENSG00000163728 | 90.37937834 | -0.229787994 | 0.193474895 | -1.187688946 | 0.23495598  | 0.395972004 |
| ENSG00000163738 | 42.20946097 | -0.438249552 | 0.266808036 | -1.642565039 | 0.100472959 | 0.210428457 |
| ENSG00000163743 | 56.6327272  | 0.322283545  | 0.232604539 | 1.385542801  | 0.165886554 | 0.307537077 |
| ENSG00000163754 | 125.4156706 | 0.282255294  | 0.167317233 | 1.68694694   | 0.091613555 | 0.196083439 |
| ENSG00000163755 | 156.2782459 | -0.10026316  | 0.151027013 | -0.663875674 | 0.506769887 | 0.664065744 |
| ENSG00000163781 | 732.0657897 | 0.118299637  | 0.079915851 | 1.480302532  | 0.138792528 | 0.269358751 |
| ENSG00000163785 | 563.737916  | -0.096658409 | 0.093850146 | -1.029922837 | 0.30304623  | 0.47377745  |
| ENSG00000163788 | 268.5902369 | -0.252984037 | 0.114370276 | -2.211973647 | 0.026968486 | 0.073917331 |
| ENSG00000163794 | 22.96294452 | 0.226665493  | 0.3694199   | 0.613571421  | 0.539498574 | 0.689580557 |
| ENSG00000163795 | 56.43891231 | 0.625031326  | 0.252180553 | 2.478507241  | 0.013193343 | 0.040847894 |
| ENSG00000163798 | 507.1726301 | -0.00891627  | 0.096836677 | -0.092075341 | 0.92663818  | 0.959877081 |
| ENSG00000163807 | 348.4323235 | 0.343655034  | 0.114066642 | 3.012756642  | 0.002588864 | 0.010186492 |
| ENSG00000163808 | 578.3037579 | 0.036708289  | 0.086864671 | 0.422591696  | 0.672593187 | 0.791282788 |
| ENSG00000163811 | 1455.377828 | -0.050479043 | 0.074458681 | -0.67794705  | 0.497805266 | 0.65591132  |
| ENSG00000163812 | 564.665839  | -0.253135955 | 0.089225304 | -2.837042236 | 0.004553359 | 0.01654022  |
| ENSG00000163818 | 108.0772873 | 0.045003542  | 0.174197158 | 0.258348314  | 0.796138102 | 0.878365687 |
| ENSG00000163820 | 1746.683111 | 0.550282069  | 0.069812415 | 7.882295286  | 3.21E-15    | 7.87E-14    |
| ENSG00000163832 | 233.5384255 | -0.073556497 | 0.131580602 | -0.559022347 | 0.576146469 | 0.720349751 |
| ENSG00000163840 | 204.5440011 | 0.631630176  | 0.13162781  | 4.798607352  | 1.60E-06    | 1.35E-05    |
| ENSG00000163848 | 424.7985116 | -0.155977185 | 0.102190993 | -1.526330066 | 0.126927684 | 0.252078776 |
| ENSG00000163864 | 21.43124979 | -0.079263468 | 0.375209365 | -0.211251305 | 0.832691178 | 0.902134873 |

|                 |             |              |             |              |             |             |
|-----------------|-------------|--------------|-------------|--------------|-------------|-------------|
| ENSG00000163866 | 114.0992737 | 0.047724264  | 0.166293752 | 0.286987719  | 0.774121724 | 0.864738597 |
| ENSG00000163867 | 55.41604718 | -0.006144596 | 0.243294544 | -0.02525579  | 0.979850937 | 0.989786143 |
| ENSG00000163870 | 113.4359478 | -0.064968444 | 0.171377156 | -0.379096289 | 0.704616362 | 0.814832908 |
| ENSG00000163872 | 439.2300502 | -0.140348233 | 0.097054315 | -1.446079269 | 0.14815497  | 0.282378949 |
| ENSG00000163874 | 48.40162373 | 0.745736021  | 0.254974225 | 2.92475062   | 0.003447324 | 0.013020854 |
| ENSG00000163875 | 233.1552324 | 0.260202405  | 0.127571857 | 2.039653663  | 0.041384833 | 0.105009529 |
| ENSG00000163877 | 150.580919  | -0.19228289  | 0.148249437 | -1.297022734 | 0.194623365 | 0.345841165 |
| ENSG00000163879 | 12.5891458  | 0.332784231  | 0.480187405 | 0.693029902  | 0.488290786 | 0.648178102 |
| ENSG00000163882 | 265.9146062 | 0.019713555  | 0.121528804 | 0.162213028  | 0.871138101 | 0.928186766 |
| ENSG00000163884 | 9.660041887 | -1.493185206 | 0.644039016 | -2.318470106 | 0.020423786 | 0.058801582 |
| ENSG00000163888 | 14.75336696 | -1.540468827 | 0.498275402 | -3.091601193 | 0.001990801 | 0.008138761 |
| ENSG00000163900 | 69.65046908 | -0.256870952 | 0.214176445 | -1.199342681 | 0.230394726 | 0.389640586 |
| ENSG00000163902 | 1259.111059 | 0.413171147  | 0.070320239 | 5.875565149  | 4.21E-09    | 5.41E-08    |
| ENSG00000163904 | 157.7566923 | -0.439616737 | 0.146292035 | -3.005062695 | 0.002655261 | 0.010409839 |
| ENSG00000163909 | 100.4990927 | -2.111527255 | 0.20711958  | -10.19472546 | 2.09E-24    | 8.91E-23    |
| ENSG00000163913 | 232.0299741 | -0.1788489   | 0.126106221 | -1.418240097 | 0.156120679 | 0.293735223 |
| ENSG00000163918 | 235.8527489 | -0.130794595 | 0.122299304 | -1.069463119 | 0.284861039 | 0.454408643 |
| ENSG00000163923 | 111.1383802 | -0.335857716 | 0.171154102 | -1.962311809 | 0.049726193 | 0.121331992 |
| ENSG00000163930 | 650.9005558 | 0.009248013  | 0.092378093 | 0.100110453  | 0.920256636 | 0.956339792 |
| ENSG00000163931 | 8545.770192 | 0.290256203  | 0.050282799 | 5.772475051  | 7.81E-09    | 9.75E-08    |
| ENSG00000163932 | 287.842579  | 0.220351592  | 0.11442393  | 1.925747462  | 0.054135914 | 0.129771349 |
| ENSG00000163933 | 216.3323323 | -0.165794524 | 0.125510179 | -1.320964758 | 0.186513115 | 0.334722864 |
| ENSG00000163935 | 128.8065509 | 0.473642389  | 0.159681733 | 2.966165144  | 0.003015385 | 0.011588814 |
| ENSG00000163938 | 2041.804843 | 0.051200294  | 0.068008152 | 0.752855248  | 0.451536903 | 0.616629899 |
| ENSG00000163939 | 1128.238702 | 0.0385946    | 0.069334949 | 0.556639919  | 0.577773474 | 0.721335669 |
| ENSG00000163945 | 182.4300547 | 0.003978876  | 0.14299164  | 0.027825935  | 0.977800981 | 0.988629033 |
| ENSG00000163946 | 843.4234565 | -0.10323972  | 0.08141264  | -1.268104307 | 0.204760704 | 0.358155148 |
| ENSG00000163947 | 40.79555147 | -0.559569731 | 0.296756648 | -1.885618185 | 0.059346425 | 0.139567928 |
| ENSG00000163950 | 235.9021785 | -0.008706809 | 0.122553718 | -0.071044837 | 0.943362071 | 0.968637121 |
| ENSG00000163956 | 1350.192455 | 0.745865085  | 0.075190313 | 9.919696503  | 3.42E-23    | 1.36E-21    |
| ENSG00000163960 | 655.6727973 | -0.110491278 | 0.08321084  | -1.327847172 | 0.1842286   | 0.331691764 |
| ENSG00000163961 | 328.838419  | -0.063133981 | 0.104989074 | -0.601338589 | 0.547614492 | 0.695834778 |
| ENSG00000163964 | 188.3704285 | -0.138044759 | 0.134557558 | -1.025916057 | 0.304931153 | 0.475876892 |
| ENSG00000163975 | 128.0876387 | -0.429106901 | 0.173357386 | -2.475273253 | 0.013313427 | 0.041165245 |
| ENSG00000164002 | 28.99289504 | -0.316534045 | 0.329369812 | -0.961029316 | 0.336537428 | 0.508425602 |
| ENSG00000164008 | 19.45835304 | -0.846795249 | 0.405891592 | -2.086259648 | 0.03695511  | 0.095582476 |
| ENSG00000164010 | 52.84617166 | -1.455770581 | 0.258017422 | -5.642140628 | 1.68E-08    | 2.00E-07    |
| ENSG00000164011 | 44.29831216 | -1.229236317 | 0.276561036 | -4.444719821 | 8.80E-06    | 6.39E-05    |
| ENSG00000164022 | 445.6815411 | 0.194458049  | 0.101188635 | 1.921738035  | 0.054638729 | 0.13079588  |
| ENSG00000164023 | 25.86327436 | 0.390271189  | 0.34307787  | 1.137558622  | 0.255304833 | 0.42057781  |
| ENSG00000164024 | 401.4281468 | -0.001952963 | 0.101787519 | -0.019186666 | 0.984692194 | 0.992036954 |
| ENSG00000164031 | 253.4842551 | -0.049029256 | 0.122182989 | -0.401277263 | 0.688216002 | 0.803671974 |
| ENSG00000164032 | 1690.442354 | -0.117481051 | 0.077297627 | -1.519853273 | 0.128547857 | 0.254361423 |
| ENSG00000164037 | 16.74588955 | -0.415546436 | 0.438935977 | -0.946713092 | 0.343784998 | 0.515604085 |
| ENSG00000164038 | 322.6680884 | 0.187197562  | 0.111461923 | 1.679475431  | 0.093059423 | 0.198482496 |
| ENSG00000164039 | 77.10224991 | 0.015899055  | 0.206540836 | 0.07697778   | 0.938641222 | 0.966112632 |
| ENSG00000164040 | 363.2140311 | 0.116101129  | 0.11403624  | 1.018107311  | 0.308626961 | 0.479885203 |
| ENSG00000164045 | 478.7347207 | 0.021486331  | 0.092757177 | 0.231640631  | 0.816817146 | 0.892349545 |
| ENSG00000164048 | 595.0182093 | -0.122289242 | 0.100712362 | -1.214242614 | 0.224655092 | 0.382809194 |
| ENSG00000164050 | 73.59129486 | -0.243319263 | 0.216371488 | -1.124544022 | 0.260782306 | 0.427046987 |

|                 |             |              |             |              |             |             |
|-----------------|-------------|--------------|-------------|--------------|-------------|-------------|
| ENSG00000164051 | 102.4278673 | -0.098182421 | 0.174330779 | -0.563196136 | 0.573301334 | 0.717878752 |
| ENSG00000164053 | 136.2335942 | 0.142551949  | 0.15525498  | 0.918179561  | 0.358524867 | 0.529791585 |
| ENSG00000164054 | 1492.026782 | 0.175024408  | 0.076180619 | 2.297492613  | 0.021590684 | 0.061468248 |
| ENSG00000164056 | 882.6266556 | -4.984387917 | 0.142312433 | -35.02426179 | 9.61E-269   | 1.23E-265   |
| ENSG00000164061 | 59.41199166 | 0.930399069  | 0.233673225 | 3.981624635  | 6.84E-05    | 0.000409305 |
| ENSG00000164062 | 1187.540076 | -0.197527684 | 0.076429513 | -2.584442537 | 0.009753656 | 0.031597846 |
| ENSG00000164066 | 147.175116  | -0.067714285 | 0.15187679  | -0.445850119 | 0.655705516 | 0.779180728 |
| ENSG00000164068 | 538.2023885 | 0.489832959  | 0.091738139 | 5.339469076  | 9.32E-08    | 9.86E-07    |
| ENSG00000164070 | 772.0905259 | 0.525876678  | 0.078158893 | 6.728302542  | 1.72E-11    | 2.95E-10    |
| ENSG00000164073 | 71.5687017  | -0.288841232 | 0.208751681 | -1.38365943  | 0.166462762 | 0.308279817 |
| ENSG00000164074 | 79.40508011 | -0.203903809 | 0.196949899 | -1.035308019 | 0.300525086 | 0.4708514   |
| ENSG00000164076 | 24.48038041 | -1.195657525 | 0.366659534 | -3.260947594 | 0.001110406 | 0.004928236 |
| ENSG00000164077 | 170.1724378 | 0.303261208  | 0.153602484 | 1.974324897  | 0.048344812 | 0.118901179 |
| ENSG00000164080 | 854.5303536 | -0.062007337 | 0.076670394 | -0.808752033 | 0.418657792 | 0.586578219 |
| ENSG00000164081 | 401.2516263 | 0.177606815  | 0.098605917 | 1.801178067  | 0.071674818 | 0.16189358  |
| ENSG00000164082 | 14.31209843 | -0.419199037 | 0.468896778 | -0.894011341 | 0.371315823 | 0.54217406  |
| ENSG00000164086 | 696.9802252 | 0.397879028  | 0.080129159 | 4.965471187  | 6.85E-07    | 6.30E-06    |
| ENSG00000164087 | 192.7415907 | -0.102485765 | 0.136681586 | -0.749813988 | 0.453366743 | 0.617396281 |
| ENSG00000164088 | 32.87097097 | -0.386906132 | 0.309344496 | -1.250729001 | 0.211033366 | 0.366274791 |
| ENSG00000164091 | 1106.289527 | -0.027290226 | 0.072078901 | -0.378616016 | 0.704973027 | 0.815025133 |
| ENSG00000164096 | 335.9396005 | 0.300604818  | 0.106244857 | 2.82935877   | 0.004664138 | 0.016877163 |
| ENSG00000164104 | 1880.323072 | -0.141959099 | 0.067270212 | -2.110281717 | 0.034834097 | 0.091086107 |
| ENSG00000164105 | 133.7985985 | 0.53535713   | 0.165053939 | 3.243528351  | 0.001180591 | 0.005184044 |
| ENSG00000164107 | 629.3026879 | 4.993172648  | 0.23324803  | 21.40713745  | 1.15E-101   | 2.98E-99    |
| ENSG00000164109 | 310.8800705 | -0.661023483 | 0.11559175  | -5.718604323 | 1.07E-08    | 1.31E-07    |
| ENSG00000164111 | 1400.310988 | 0.278912075  | 0.065648564 | 4.248563237  | 2.15E-05    | 0.00014357  |
| ENSG00000164114 | 785.2171182 | -1.865744116 | 0.087536772 | -21.31383277 | 8.45E-101   | 2.12E-98    |
| ENSG00000164116 | 33.89056448 | 2.405009091  | 0.347969383 | 6.911553736  | 4.79E-12    | 8.79E-11    |
| ENSG00000164117 | 207.531874  | 1.378608881  | 0.132876855 | 10.37508666  | 3.22E-25    | 1.46E-23    |
| ENSG00000164118 | 553.3910129 | 1.300774809  | 0.107784903 | 12.0682468   | 1.55E-33    | 9.53E-32    |
| ENSG00000164124 | 81.17798949 | 0.535288651  | 0.197151285 | 2.715116217  | 0.006625252 | 0.022698758 |
| ENSG00000164125 | 151.7835096 | 1.89961345   | 0.161423355 | 11.76789722  | 5.71E-32    | 3.33E-30    |
| ENSG00000164134 | 884.3689465 | 0.147795275  | 0.076546243 | 1.930797244  | 0.053508131 | 0.128461583 |
| ENSG00000164142 | 78.3723917  | -1.208637242 | 0.22338086  | -5.410657131 | 6.28E-08    | 6.85E-07    |
| ENSG00000164144 | 142.3398902 | 0.080778925  | 0.149435136 | 0.54056179   | 0.58880966  | 0.730202993 |
| ENSG00000164151 | 474.8368212 | 0.064360463  | 0.092680179 | 0.694436113  | 0.487408753 | 0.64779673  |
| ENSG00000164161 | 28.0910961  | -4.078089476 | 0.557313912 | -7.317401175 | 2.53E-13    | 5.33E-12    |
| ENSG00000164163 | 430.1335911 | 0.037156793  | 0.110099058 | 0.337485108  | 0.735751236 | 0.83739245  |
| ENSG00000164164 | 554.1526306 | -0.206436664 | 0.091328796 | -2.26036775  | 0.023798436 | 0.066513457 |
| ENSG00000164167 | 279.4243635 | 0.176429355  | 0.115338529 | 1.529665378  | 0.126099578 | 0.2511087   |
| ENSG00000164168 | 228.4157056 | 0.037366295  | 0.12956782  | 0.288391782  | 0.773046857 | 0.864018874 |
| ENSG00000164169 | 64.91618161 | -0.169501845 | 0.224027316 | -0.756612401 | 0.44928211  | 0.614298178 |
| ENSG00000164171 | 74.94400053 | 0.078412847  | 0.20261341  | 0.387007191  | 0.698750884 | 0.810918182 |
| ENSG00000164172 | 126.6680603 | 0.480340269  | 0.165050151 | 2.910268579  | 0.003611183 | 0.013563178 |
| ENSG00000164180 | 129.9450819 | -0.317635999 | 0.157324477 | -2.018986527 | 0.04348862  | 0.109361608 |
| ENSG00000164182 | 415.52026   | 0.26558363   | 0.101403987 | 2.61906498   | 0.008817115 | 0.029024793 |
| ENSG00000164187 | 73.48934537 | 0.227475898  | 0.208632792 | 1.090317084  | 0.275573492 | 0.443919822 |
| ENSG00000164190 | 1348.856702 | -0.117537484 | 0.068900197 | -1.705909276 | 0.088024972 | 0.189907355 |
| ENSG00000164199 | 12.80699583 | 0.001674352  | 0.485459141 | 0.003449006  | 0.997248097 | 0.998813347 |
| ENSG00000164209 | 159.819493  | -0.480008108 | 0.151756522 | -3.163014684 | 0.001561445 | 0.0066085   |

|                 |             |              |             |              |             |             |
|-----------------|-------------|--------------|-------------|--------------|-------------|-------------|
| ENSG00000164211 | 557.1588626 | 0.107919427  | 0.086569893 | 1.246616155  | 0.212538275 | 0.367720798 |
| ENSG00000164219 | 409.9234228 | -0.331800917 | 0.102199628 | -3.246596141 | 0.00116794  | 0.005138131 |
| ENSG00000164221 | 174.2714717 | 0.247114796  | 0.146750063 | 1.683916113  | 0.092197882 | 0.197033873 |
| ENSG00000164237 | 287.566282  | 0.193804279  | 0.113207738 | 1.71193491   | 0.086908664 | 0.188192695 |
| ENSG00000164244 | 695.5245784 | 0.251556689  | 0.080460133 | 3.126476192  | 0.001769148 | 0.007358965 |
| ENSG00000164252 | 111.5977576 | 0.277078202  | 0.182415561 | 1.518939506  | 0.128777724 | 0.254677743 |
| ENSG00000164253 | 161.1946562 | -0.19042971  | 0.149896105 | -1.270411328 | 0.20393815  | 0.357063342 |
| ENSG00000164258 | 243.2091818 | -0.054399219 | 0.125825021 | -0.432340239 | 0.665494145 | 0.786025079 |
| ENSG00000164284 | 347.5549234 | -0.347496936 | 0.105938387 | -3.280179612 | 0.00103741  | 0.004642402 |
| ENSG00000164291 | 43.39150031 | 0.246335982  | 0.27894955  | 0.883084351  | 0.377190699 | 0.546670343 |
| ENSG00000164292 | 691.6502984 | 0.06050269   | 0.086669466 | 0.69808542   | 0.485123776 | 0.64556022  |
| ENSG00000164294 | 203.3543434 | -0.397251887 | 0.136297332 | -2.914597669 | 0.003561473 | 0.01340515  |
| ENSG00000164296 | 67.72365339 | -0.111892698 | 0.218699921 | -0.511626604 | 0.608912363 | 0.745198811 |
| ENSG00000164300 | 155.1559901 | -0.269846761 | 0.152961841 | -1.764144305 | 0.077707687 | 0.172578637 |
| ENSG00000164303 | 29.36875678 | 0.78313889   | 0.329235774 | 2.378656727  | 0.017375849 | 0.051525975 |
| ENSG00000164305 | 147.1220756 | -0.117552648 | 0.154183787 | -0.762418995 | 0.445809973 | 0.61077662  |
| ENSG00000164306 | 71.88051372 | -0.265695267 | 0.227866759 | -1.166011525 | 0.243609786 | 0.406701528 |
| ENSG00000164307 | 385.2396336 | 0.015113637  | 0.100307703 | 0.150672749  | 0.880233871 | 0.93402668  |
| ENSG00000164308 | 134.3222242 | 0.646910869  | 0.162011704 | 3.992988487  | 6.52E-05    | 0.00039167  |
| ENSG00000164309 | 16.98198874 | 0.44546542   | 0.433254347 | 1.028184537  | 0.303863031 | 0.474638867 |
| ENSG00000164323 | 698.5695928 | 0.234949268  | 0.086254482 | 2.723907918  | 0.006451449 | 0.022206201 |
| ENSG00000164327 | 179.5051726 | -0.244432183 | 0.135814398 | -1.799751622 | 0.071899866 | 0.162219309 |
| ENSG00000164329 | 280.0249181 | -0.215934136 | 0.113911315 | -1.895633774 | 0.058008488 | 0.136948778 |
| ENSG00000164331 | 38.41521531 | 0.046863184  | 0.283884076 | 0.165078594  | 0.868882122 | 0.926961915 |
| ENSG00000164332 | 198.1151695 | -0.11752855  | 0.143912475 | -0.816666869 | 0.41411883  | 0.582431606 |
| ENSG00000164338 | 157.1867805 | -0.192383041 | 0.151336339 | -1.271228327 | 0.203647432 | 0.356643246 |
| ENSG00000164342 | 20.22824272 | 1.07867701   | 0.43806071  | 2.462391596  | 0.013801389 | 0.042375542 |
| ENSG00000164346 | 1027.579208 | 0.158957246  | 0.077424716 | 2.053055596  | 0.040067186 | 0.101958163 |
| ENSG00000164347 | 337.7094313 | -0.137362928 | 0.105408562 | -1.303147729 | 0.192524331 | 0.343022486 |
| ENSG00000164362 | 67.0012125  | 0.06794774   | 0.219541482 | 0.309498411  | 0.75694242  | 0.853146929 |
| ENSG00000164366 | 85.0011746  | -0.010302832 | 0.190796586 | -0.053999036 | 0.956935932 | 0.976895279 |
| ENSG00000164385 | 10.34560722 | -0.023653032 | 0.530566033 | -0.04458075  | 0.964441487 | 0.981348031 |
| ENSG00000164402 | 212.2097019 | -0.032299322 | 0.131949965 | -0.244784622 | 0.806623201 | 0.885690308 |
| ENSG00000164403 | 199.3854987 | 0.433728522  | 0.137482091 | 3.154800146  | 0.001606081 | 0.006779032 |
| ENSG00000164404 | 9.017001113 | 0.686844565  | 0.582484393 | 1.179163894  | 0.23833292  | 0.399840264 |
| ENSG00000164405 | 1051.229185 | 0.77695412   | 0.086107022 | 9.023121487  | 1.83E-19    | 6.04E-18    |
| ENSG00000164414 | 18.65892343 | 0.293811564  | 0.417033188 | 0.704528014  | 0.48110401  | 0.641548133 |
| ENSG00000164418 | 572.7204923 | 1.676281088  | 0.092528242 | 18.11642649  | 2.36E-73    | 3.91E-71    |
| ENSG00000164438 | 99.8796176  | -5.097037279 | 0.393140045 | -12.96494049 | 1.93E-38    | 1.44E-36    |
| ENSG00000164442 | 334.1887194 | -2.011141487 | 0.138940876 | -14.47480066 | 1.75E-47    | 1.71E-45    |
| ENSG00000164463 | 90.57829417 | 0.074136896  | 0.190094357 | 0.390000508  | 0.696536171 | 0.809484868 |
| ENSG00000164465 | 109.494317  | 0.54240014   | 0.173578851 | 3.12480545   | 0.001779227 | 0.007389947 |
| ENSG00000164466 | 819.5002262 | 0.312196272  | 0.076482232 | 4.081945081  | 4.47E-05    | 0.000277709 |
| ENSG00000164494 | 72.44190859 | -0.146818369 | 0.232571676 | -0.631282239 | 0.527855998 | 0.680568444 |
| ENSG00000164506 | 693.3061766 | -0.760806344 | 0.088676944 | -8.579528243 | 9.53E-18    | 2.78E-16    |
| ENSG00000164532 | 34.51844996 | -0.014256575 | 0.299145844 | -0.047657606 | 0.961989121 | 0.979825424 |
| ENSG00000164535 | 83.16804959 | 0.133565816  | 0.195612473 | 0.682808281  | 0.494727997 | 0.653757683 |
| ENSG00000164542 | 18.02433118 | -0.38519839  | 0.430761479 | -0.894226641 | 0.371200641 | 0.54217406  |
| ENSG00000164543 | 49.66101941 | 0.129768223  | 0.246394478 | 0.526668553  | 0.598423777 | 0.737337313 |
| ENSG00000164548 | 944.3914216 | -0.018670902 | 0.076508977 | -0.24403544  | 0.807203373 | 0.885981073 |

|                 |             |              |             |              |             |             |
|-----------------|-------------|--------------|-------------|--------------|-------------|-------------|
| ENSG00000164574 | 112.0812917 | 0.104919093  | 0.170951361 | 0.613736515  | 0.539389454 | 0.689580557 |
| ENSG00000164576 | 39.62268053 | -0.354267282 | 0.277068952 | -1.278624979 | 0.20102915  | 0.353410009 |
| ENSG00000164587 | 1918.764806 | 0.459225404  | 0.085464474 | 5.373289984  | 7.73E-08    | 8.26E-07    |
| ENSG00000164588 | 10.48135962 | -3.660796221 | 0.842830075 | -4.343457037 | 1.40E-05    | 9.75E-05    |
| ENSG00000164597 | 220.3058045 | 0.47756149   | 0.129578646 | 3.685495281  | 0.000228258 | 0.001203131 |
| ENSG00000164603 | 31.49540711 | 0.389306197  | 0.30733787  | 1.266704284  | 0.205261048 | 0.358682061 |
| ENSG00000164609 | 279.9949214 | 0.17062036   | 0.11486966  | 1.485338773  | 0.137454106 | 0.267278215 |
| ENSG00000164610 | 117.7811049 | 0.123160577  | 0.164937332 | 0.74671134   | 0.455237823 | 0.618924284 |
| ENSG00000164611 | 710.7430012 | 0.24765897   | 0.085119842 | 2.909532775  | 0.003619694 | 0.01358788  |
| ENSG00000164615 | 283.2908586 | 0.127989642  | 0.117180813 | 1.092240609  | 0.274727358 | 0.443115764 |
| ENSG00000164620 | 56.22086363 | 0.661724677  | 0.236071031 | 2.803074458  | 0.005061798 | 0.018087784 |
| ENSG00000164626 | 52.33727198 | -0.270492196 | 0.249923809 | -1.082298629 | 0.279119855 | 0.447809167 |
| ENSG00000164631 | 254.3283893 | -0.107079115 | 0.121953251 | -0.878034113 | 0.379925206 | 0.549450157 |
| ENSG00000164638 | 52.75121967 | -1.379674821 | 0.259794914 | -5.310630595 | 1.09E-07    | 1.14E-06    |
| ENSG00000164647 | 58.87493627 | 0.743081906  | 0.233979525 | 3.175841587  | 0.001494025 | 0.006371151 |
| ENSG00000164654 | 163.1891962 | -0.332665058 | 0.147679626 | -2.252613083 | 0.024283555 | 0.067653928 |
| ENSG00000164663 | 36.1404778  | -0.295451364 | 0.29436148  | -1.003702534 | 0.315522015 | 0.486941084 |
| ENSG00000164683 | 16.93469264 | -0.997736238 | 0.434411392 | -2.296754315 | 0.021632789 | 0.061550696 |
| ENSG00000164684 | 303.5515487 | 0.077393416  | 0.110506654 | 0.700350732  | 0.483708297 | 0.644164813 |
| ENSG00000164687 | 689.7373449 | 0.396956806  | 0.087261046 | 4.549072291  | 5.39E-06    | 4.10E-05    |
| ENSG00000164694 | 21.2675939  | -3.3010878   | 0.534898068 | -6.171433398 | 6.77E-10    | 9.66E-09    |
| ENSG00000164695 | 67.06606757 | 0.437660449  | 0.222365545 | 1.968202624  | 0.049044728 | 0.120127515 |
| ENSG00000164713 | 423.795757  | 0.36976417   | 0.119937272 | 3.082979665  | 0.002049392 | 0.008334628 |
| ENSG00000164715 | 541.1836175 | -0.069534962 | 0.094926252 | -0.73251561  | 0.463853918 | 0.626876659 |
| ENSG00000164733 | 1595.323326 | 0.207885178  | 0.070451257 | 2.950766045  | 0.003169869 | 0.012109642 |
| ENSG00000164742 | 234.0009074 | -0.883653676 | 0.123561744 | -7.151515094 | 8.58E-13    | 1.71E-11    |
| ENSG00000164749 | 63.43811378 | 0.106794547  | 0.225576434 | 0.473429538  | 0.635906761 | 0.764972362 |
| ENSG00000164751 | 131.3022718 | -0.20228573  | 0.186048593 | -1.087273637 | 0.276915896 | 0.445469261 |
| ENSG00000164754 | 2428.383317 | 0.065884611  | 0.06548158  | 1.006154868  | 0.314341079 | 0.485598717 |
| ENSG00000164758 | 62.18846561 | -0.127454704 | 0.226173031 | -0.563527417 | 0.573075796 | 0.717878752 |
| ENSG00000164808 | 313.5413432 | -0.062866645 | 0.108857319 | -0.577514177 | 0.563592164 | 0.70970678  |
| ENSG00000164815 | 142.7565188 | 0.491746545  | 0.15871384  | 3.098321765  | 0.0019462   | 0.007993646 |
| ENSG00000164818 | 603.3676389 | 0.079653425  | 0.086177858 | 0.924291082  | 0.355334785 | 0.526906758 |
| ENSG00000164823 | 263.028683  | 0.268037388  | 0.12055964  | 2.223276269  | 0.026197177 | 0.072155243 |
| ENSG00000164828 | 767.1881484 | -0.00089168  | 0.077907911 | -0.011445313 | 0.990868161 | 0.995236126 |
| ENSG00000164830 | 185.7464252 | 0.564853745  | 0.135946343 | 4.154975646  | 3.25E-05    | 0.000208857 |
| ENSG00000164849 | 14.3047452  | 0.650186311  | 0.464591445 | 1.39947973   | 0.161669173 | 0.301334207 |
| ENSG00000164850 | 85.94751696 | 0.433824997  | 0.19638037  | 2.20910571   | 0.027167289 | 0.074317217 |
| ENSG00000164855 | 45.21913936 | 1.261499029  | 0.272942953 | 4.621841355  | 3.80E-06    | 2.99E-05    |
| ENSG00000164867 | 659.8922464 | 0.706811361  | 0.084551339 | 8.359552558  | 6.30E-17    | 1.74E-15    |
| ENSG00000164877 | 52.22885396 | 0.085577772  | 0.245136381 | 0.349102697  | 0.727012212 | 0.831311943 |
| ENSG00000164880 | 1178.219    | 0.173433506  | 0.076578448 | 2.26478219   | 0.023526049 | 0.065870123 |
| ENSG00000164885 | 89.85659339 | 0.619530195  | 0.185604654 | 3.337902271  | 0.000844134 | 0.00385737  |
| ENSG00000164889 | 1253.459777 | 1.121857494  | 0.071701542 | 15.64621144  | 3.53E-55    | 4.20E-53    |
| ENSG00000164896 | 229.9583841 | 0.672382372  | 0.130933928 | 5.135279931  | 2.82E-07    | 2.76E-06    |
| ENSG00000164897 | 329.3733595 | 0.755665627  | 0.125869073 | 6.003584569  | 1.93E-09    | 2.60E-08    |
| ENSG00000164902 | 461.4507957 | 0.128906546  | 0.092800013 | 1.389078959  | 0.164808741 | 0.305942697 |
| ENSG00000164904 | 635.2191614 | -0.630364446 | 0.085436075 | -7.378199928 | 1.60E-13    | 3.47E-12    |
| ENSG00000164916 | 1284.715951 | 0.184941164  | 0.087988753 | 2.101872764  | 0.035564423 | 0.092650862 |
| ENSG00000164919 | 751.02579   | 0.299945586  | 0.098863321 | 3.033942052  | 0.002413808 | 0.009594442 |

|                 |             |              |             |              |             |             |
|-----------------|-------------|--------------|-------------|--------------|-------------|-------------|
| ENSG00000164920 | 99.33284981 | -0.068048894 | 0.195768924 | -0.34759804  | 0.728142079 | 0.831967771 |
| ENSG00000164924 | 1804.74905  | 0.013073201  | 0.063105363 | 0.207164664  | 0.835881263 | 0.904036349 |
| ENSG00000164930 | 122.6662909 | -1.253456427 | 0.169376364 | -7.400421163 | 1.36E-13    | 2.95E-12    |
| ENSG00000164933 | 72.19940306 | 0.119823159  | 0.246784256 | 0.485538099  | 0.627294694 | 0.758183494 |
| ENSG00000164934 | 389.9678577 | 0.310796141  | 0.100938381 | 3.079068037  | 0.002076493 | 0.0084302   |
| ENSG00000164941 | 528.433759  | 0.279558581  | 0.093142306 | 3.001413554  | 0.002687293 | 0.010506098 |
| ENSG00000164944 | 641.4427089 | 0.244072559  | 0.0831184   | 2.936444391  | 0.003319983 | 0.012597463 |
| ENSG00000164946 | 1006.199414 | -0.000423602 | 0.076743823 | -0.00551969  | 0.995595947 | 0.997940364 |
| ENSG00000164951 | 123.7073237 | 0.39965778   | 0.163779942 | 2.440211997  | 0.014678645 | 0.044668745 |
| ENSG00000164953 | 106.8937119 | -0.281381629 | 0.174271385 | -1.614617505 | 0.106393552 | 0.22020189  |
| ENSG00000164961 | 522.300623  | 0.307284732  | 0.089950117 | 3.416168241  | 0.00063509  | 0.002997684 |
| ENSG00000164967 | 50.96056285 | 0.070257253  | 0.246469892 | 0.285054098  | 0.775602697 | 0.86552026  |
| ENSG00000164970 | 177.4392499 | 0.825742634  | 0.142624108 | 5.789642756  | 7.05E-09    | 8.86E-08    |
| ENSG00000164975 | 285.1216207 | 0.236275598  | 0.117840158 | 2.005051605  | 0.04495753  | 0.112170236 |
| ENSG00000164976 | 86.2478215  | -0.452440267 | 0.205056307 | -2.206419664 | 0.027354629 | 0.074727826 |
| ENSG00000164978 | 99.37373616 | 0.186747426  | 0.17798642  | 1.049222895  | 0.294075544 | 0.464404628 |
| ENSG00000164983 | 75.00633564 | -0.281723868 | 0.202261477 | -1.392869631 | 0.163659217 | 0.304203511 |
| ENSG00000164985 | 5028.732892 | -0.047864372 | 0.059965105 | -0.798203752 | 0.424752261 | 0.591914187 |
| ENSG00000164989 | 91.33698015 | -0.188920513 | 0.186199867 | -1.014611429 | 0.310291089 | 0.481672995 |
| ENSG00000165006 | 320.1385241 | 0.149499112  | 0.111085709 | 1.345799691  | 0.178367125 | 0.324045914 |
| ENSG00000165028 | 17.71733442 | 0.105686415  | 0.410073266 | 0.257725689  | 0.796618618 | 0.878481844 |
| ENSG00000165029 | 454.3683957 | -1.225164814 | 0.098047921 | -12.49557162 | 7.89E-36    | 5.25E-34    |
| ENSG00000165030 | 22.72561941 | -0.723077931 | 0.369699784 | -1.955851644 | 0.050482633 | 0.122771736 |
| ENSG00000165046 | 14.04892745 | 1.221009731  | 0.469286892 | 2.601840687  | 0.009272492 | 0.030304953 |
| ENSG00000165055 | 479.3215949 | 0.843475328  | 0.092213193 | 9.147013578  | 5.85E-20    | 1.98E-18    |
| ENSG00000165060 | 163.6490336 | -0.078935664 | 0.147060871 | -0.536755042 | 0.59143683  | 0.732133279 |
| ENSG00000165097 | 244.4964309 | 0.452900113  | 0.123355616 | 3.67149974   | 0.000241131 | 0.001264342 |
| ENSG00000165102 | 457.2994416 | -0.477448035 | 0.102044689 | -4.678813183 | 2.89E-06    | 2.32E-05    |
| ENSG00000165113 | 58.12271189 | -0.097622325 | 0.231604119 | -0.421505132 | 0.673386264 | 0.791884207 |
| ENSG00000165115 | 46.80527211 | -0.611674281 | 0.260294535 | -2.349931321 | 0.018776875 | 0.054830888 |
| ENSG00000165119 | 4330.941608 | 0.215503614  | 0.055257804 | 3.899967027  | 9.62E-05    | 0.000555904 |
| ENSG00000165138 | 537.4089965 | -0.008801591 | 0.088479825 | -0.099475677 | 0.920760599 | 0.956651193 |
| ENSG00000165152 | 310.7246888 | 0.165036868  | 0.118351523 | 1.394463406  | 0.163177713 | 0.303516596 |
| ENSG00000165156 | 479.4430227 | 0.059706908  | 0.092623362 | 0.644620395  | 0.519173215 | 0.67395122  |
| ENSG00000165164 | 28.64430497 | 0.33604125   | 0.319732415 | 1.051007761  | 0.293255025 | 0.46389459  |
| ENSG00000165171 | 22.86128385 | -0.860457284 | 0.383313433 | -2.244787711 | 0.024781764 | 0.068745301 |
| ENSG00000165175 | 581.6416308 | -0.106991053 | 0.091447767 | -1.169968998 | 0.242013445 | 0.404709865 |
| ENSG00000165185 | 264.7783288 | -0.287197352 | 0.121576312 | -2.362280514 | 0.018162893 | 0.05342005  |
| ENSG00000165194 | 7.662758732 | -2.053435756 | 0.728518133 | -2.818647421 | 0.004822646 | 0.017352384 |
| ENSG00000165195 | 38.76107932 | 0.154256411  | 0.277157072 | 0.556566752  | 0.577823475 | 0.721335669 |
| ENSG00000165209 | 250.1979294 | -0.051613987 | 0.118787979 | -0.434505136 | 0.663921666 | 0.785091981 |
| ENSG00000165219 | 736.9079074 | 0.052041088  | 0.081634416 | 0.637489559  | 0.523806009 | 0.677336188 |
| ENSG00000165233 | 255.3300803 | 0.632799969  | 0.123021758 | 5.143805287  | 2.69E-07    | 2.65E-06    |
| ENSG00000165238 | 824.4328432 | 0.454552709  | 0.080242238 | 5.664756117  | 1.47E-08    | 1.77E-07    |
| ENSG00000165240 | 87.71030582 | -0.212214156 | 0.190755973 | -1.112490227 | 0.26592743  | 0.432748217 |
| ENSG00000165244 | 181.5903307 | 0.116411187  | 0.135472772 | 0.859295823  | 0.390177328 | 0.558526539 |
| ENSG00000165259 | 27.39709141 | -1.806594634 | 0.383200464 | -4.714489682 | 2.42E-06    | 1.98E-05    |
| ENSG00000165264 | 97.04906624 | 0.182239861  | 0.184135602 | 0.989704643  | 0.322318505 | 0.494235491 |
| ENSG00000165271 | 309.6742514 | 0.45351377   | 0.112367456 | 4.035988594  | 5.44E-05    | 0.000330925 |
| ENSG00000165272 | 7.698261875 | -0.555249321 | 0.63267605  | -0.877620262 | 0.38014983  | 0.549661828 |

|                 |             |              |             |              |             |             |
|-----------------|-------------|--------------|-------------|--------------|-------------|-------------|
| ENSG00000165275 | 57.58471117 | 0.281506065  | 0.234986404 | 1.197967459  | 0.230929686 | 0.390451287 |
| ENSG00000165280 | 1853.467636 | 0.23609339   | 0.063266325 | 3.731738625  | 0.000190163 | 0.001023454 |
| ENSG00000165282 | 248.191722  | 0.147127182  | 0.125149158 | 1.175614637  | 0.239748904 | 0.401879815 |
| ENSG00000165283 | 1141.721832 | 0.359602152  | 0.095218391 | 3.776603945  | 0.000158981 | 0.000873029 |
| ENSG00000165288 | 1040.674841 | -0.337809461 | 0.072052812 | -4.688359122 | 2.75E-06    | 2.23E-05    |
| ENSG00000165300 | 524.254856  | 1.440258216  | 0.095736001 | 15.04406077  | 3.78E-51    | 4.21E-49    |
| ENSG00000165304 | 313.1386314 | -0.298403712 | 0.113308987 | -2.633539657 | 0.008449997 | 0.028054149 |
| ENSG00000165322 | 195.4933616 | -0.34876252  | 0.131600891 | -2.650153181 | 0.008045528 | 0.026870075 |
| ENSG00000165338 | 108.6726463 | 0.22592981   | 0.173680111 | 1.300838705  | 0.193313671 | 0.344079718 |
| ENSG00000165349 | 17.85770147 | -2.306998374 | 0.498259189 | -4.630117068 | 3.65E-06    | 2.89E-05    |
| ENSG00000165355 | 63.02918213 | 0.286212399  | 0.226985093 | 1.260930375  | 0.207333933 | 0.361342402 |
| ENSG00000165359 | 208.4138402 | -0.312343957 | 0.138693307 | -2.252047796 | 0.024319252 | 0.067713088 |
| ENSG00000165379 | 406.31115   | 5.371701094  | 0.199016454 | 26.99124116  | 1.87E-160   | 1.05E-157   |
| ENSG00000165389 | 228.0142931 | -0.321067    | 0.129844616 | -2.472701678 | 0.013409603 | 0.041403627 |
| ENSG00000165392 | 260.6889693 | -0.098491556 | 0.121900921 | -0.807964006 | 0.419111303 | 0.586964754 |
| ENSG00000165406 | 69.70258361 | 0.242406927  | 0.214539091 | 1.129896311  | 0.258519919 | 0.424331538 |
| ENSG00000165410 | 179.0307322 | -0.055708638 | 0.143363157 | -0.388584061 | 0.697583859 | 0.810233212 |
| ENSG00000165416 | 732.894465  | 0.064287336  | 0.081186021 | 0.791852289  | 0.428446809 | 0.595563472 |
| ENSG00000165417 | 661.4912489 | 0.11995665   | 0.082033424 | 1.46228993   | 0.143661777 | 0.276053455 |
| ENSG00000165424 | 53.97557479 | -1.268827151 | 0.254512167 | -4.985330032 | 6.19E-07    | 5.74E-06    |
| ENSG00000165434 | 8.862595691 | -0.065694919 | 0.582388749 | -0.112802521 | 0.910187119 | 0.951381168 |
| ENSG00000165449 | 38.92886896 | 0.043971259  | 0.291743128 | 0.150719092  | 0.880197312 | 0.93402668  |
| ENSG00000165458 | 840.5771559 | 0.286911135  | 0.080176159 | 3.578509347  | 0.00034556  | 0.001744188 |
| ENSG00000165471 | 10.17424477 | -4.791236265 | 1.094885976 | -4.376013913 | 1.21E-05    | 8.51E-05    |
| ENSG00000165475 | 35.08341467 | -0.688605463 | 0.305045912 | -2.257383024 | 0.023984152 | 0.066965887 |
| ENSG00000165476 | 764.4091196 | -1.122470702 | 0.086856739 | -12.92324251 | 3.33E-38    | 2.45E-36    |
| ENSG00000165480 | 256.2985513 | 0.017781723  | 0.118693665 | 0.149811892  | 0.880913027 | 0.934253325 |
| ENSG00000165487 | 311.2498046 | 0.178349314  | 0.130596018 | 1.365656608  | 0.17204677  | 0.315295626 |
| ENSG00000165490 | 82.63153766 | 0.132849874  | 0.195237385 | 0.680453051  | 0.49621764  | 0.654863696 |
| ENSG00000165494 | 518.4043398 | -0.177301848 | 0.090032506 | -1.969309258 | 0.048917589 | 0.119878815 |
| ENSG00000165495 | 10.44439138 | -2.641168832 | 0.675480161 | -3.910061291 | 9.23E-05    | 0.00053538  |
| ENSG00000165501 | 83.13646607 | 0.15732149   | 0.206938512 | 0.760233021  | 0.44711531  | 0.612141365 |
| ENSG00000165502 | 1787.150661 | 0.073430235  | 0.074493358 | 0.985728616  | 0.324266303 | 0.496196952 |
| ENSG00000165506 | 210.3316986 | 0.324583415  | 0.135242097 | 2.400017607  | 0.016394283 | 0.049078207 |
| ENSG00000165516 | 184.1738327 | -0.327382722 | 0.134925975 | -2.426387666 | 0.015249971 | 0.046147423 |
| ENSG00000165521 | 386.6136712 | -3.00731758  | 0.131953506 | -22.79073643 | 5.67E-115   | 1.81E-112   |
| ENSG00000165525 | 853.0569043 | -0.068262928 | 0.0761035   | -0.896974878 | 0.369732322 | 0.541059478 |
| ENSG00000165526 | 87.20282915 | -0.172931567 | 0.192769646 | -0.897089195 | 0.369671324 | 0.541059478 |
| ENSG00000165527 | 634.1435538 | -0.088603278 | 0.089953975 | -0.984984583 | 0.324631644 | 0.496634797 |
| ENSG00000165533 | 290.0629342 | -0.591624272 | 0.113040677 | -5.233729044 | 1.66E-07    | 1.69E-06    |
| ENSG00000165548 | 10.9545692  | -1.204821045 | 0.55443827  | -2.17304813  | 0.029776695 | 0.079968486 |
| ENSG00000165568 | 16.92596346 | 5.222353208  | 0.911143072 | 5.731650021  | 9.95E-09    | 1.22E-07    |
| ENSG00000165572 | 268.9933003 | 0.324847701  | 0.123800754 | 2.623955769  | 0.008691507 | 0.028667817 |
| ENSG00000165609 | 880.7987086 | 0.305112566  | 0.085543587 | 3.56674975   | 0.000361436 | 0.001814545 |
| ENSG00000165626 | 98.98650462 | -0.102384721 | 0.181516363 | -0.564052295 | 0.572718543 | 0.717660783 |
| ENSG00000165629 | 610.0260532 | 0.01541027   | 0.091180634 | 0.169008151  | 0.86579023  | 0.924545891 |
| ENSG00000165630 | 150.8369558 | -0.184501743 | 0.148296874 | -1.244137781 | 0.213448858 | 0.368932707 |
| ENSG00000165632 | 241.6393624 | -0.180321899 | 0.119746172 | -1.50586775  | 0.132101127 | 0.259927795 |
| ENSG00000165633 | 22.54712264 | -0.067902202 | 0.364180206 | -0.186452205 | 0.852090157 | 0.915154861 |
| ENSG00000165637 | 301.2453383 | 0.057110827  | 0.117777383 | 0.484904872  | 0.627743826 | 0.758494295 |



|                 |             |              |             |              |             |             |
|-----------------|-------------|--------------|-------------|--------------|-------------|-------------|
| ENSG00000165644 | 90.62501035 | 0.132396476  | 0.187609728 | 0.70570155   | 0.480373757 | 0.6408825   |
| ENSG00000165650 | 537.8213131 | -0.065584065 | 0.09173196  | -0.71495328  | 0.474637912 | 0.635762254 |
| ENSG00000165660 | 142.1904238 | 0.131111798  | 0.150948612 | 0.86858565   | 0.385073806 | 0.554120434 |
| ENSG00000165661 | 527.2290652 | 0.300911434  | 0.088047634 | 3.417598182  | 0.000631763 | 0.002983986 |
| ENSG00000165669 | 171.6839165 | -0.073130657 | 0.138101126 | -0.529544246 | 0.59642796  | 0.73589786  |
| ENSG00000165671 | 1718.136182 | -0.218068139 | 0.066543136 | -3.277094401 | 0.001048813 | 0.004691935 |
| ENSG00000165672 | 584.4272924 | 0.019319673  | 0.097545075 | 0.19805893   | 0.842998957 | 0.90893509  |
| ENSG00000165675 | 42.97562039 | 0.253362659  | 0.267335073 | 0.947734449  | 0.343264659 | 0.515098671 |
| ENSG00000165678 | 1694.098435 | -0.067449991 | 0.076828325 | -0.87793129  | 0.379981007 | 0.549474286 |
| ENSG00000165684 | 449.2779691 | 0.690956447  | 0.104937602 | 6.584450518  | 4.57E-11    | 7.57E-10    |
| ENSG00000165688 | 657.2944423 | 0.153957862  | 0.083809053 | 1.837007534  | 0.066208783 | 0.152289959 |
| ENSG00000165689 | 426.085562  | 0.095119319  | 0.096150615 | 0.989274158  | 0.322529024 | 0.494364363 |
| ENSG00000165698 | 23.46740922 | -0.996513225 | 0.366099345 | -2.721974889 | 0.006489307 | 0.022303719 |
| ENSG00000165699 | 334.6675105 | 0.075848465  | 0.106570403 | 0.711721671  | 0.476637145 | 0.63753861  |
| ENSG00000165704 | 214.2703545 | 0.255489621  | 0.132305576 | 1.931057095  | 0.053475992 | 0.128428323 |
| ENSG00000165714 | 125.7301442 | -0.160066222 | 0.164991806 | -0.970146488 | 0.331973479 | 0.504440134 |
| ENSG00000165716 | 340.6221812 | -0.276352894 | 0.105782604 | -2.612460688 | 0.008989303 | 0.029489196 |
| ENSG00000165724 | 319.1211566 | 0.07652405   | 0.113173836 | 0.676163788  | 0.498936661 | 0.656970685 |
| ENSG00000165730 | 57.31616286 | -0.228462698 | 0.246567077 | -0.926574223 | 0.354147643 | 0.525590274 |
| ENSG00000165732 | 2981.886492 | 0.018782318  | 0.063195444 | 0.297210006  | 0.766306183 | 0.859082439 |
| ENSG00000165733 | 1420.810498 | 0.120460865  | 0.06869438  | 1.753576714  | 0.079503064 | 0.175566663 |
| ENSG00000165752 | 184.4395046 | 0.06119086   | 0.136466022 | 0.448396306  | 0.653867208 | 0.777851682 |
| ENSG00000165757 | 15.56734504 | -0.962967729 | 0.458657599 | -2.099535104 | 0.035769757 | 0.093099458 |
| ENSG00000165775 | 118.1013628 | 0.449389879  | 0.172981977 | 2.597900005  | 0.00937958  | 0.03059089  |
| ENSG00000165782 | 139.579828  | 0.165225983  | 0.17588819  | 0.939380772  | 0.347535281 | 0.519343415 |
| ENSG00000165792 | 177.1954374 | -0.179182105 | 0.140118156 | -1.278792914 | 0.20096999  | 0.353364056 |
| ENSG00000165795 | 35.09331357 | -0.559293666 | 0.297483042 | -1.880085877 | 0.060096375 | 0.141024687 |
| ENSG00000165801 | 567.8527322 | -0.487493101 | 0.090347591 | -5.395750952 | 6.82E-08    | 7.38E-07    |
| ENSG00000165802 | 632.1922875 | 0.476314111  | 0.092590251 | 5.144322505  | 2.68E-07    | 2.64E-06    |
| ENSG00000165804 | 239.9155556 | -0.288189319 | 0.125949831 | -2.288127869 | 0.022130076 | 0.062610508 |
| ENSG00000165806 | 173.3622906 | 0.105605653  | 0.140339738 | 0.7525       | 0.45175043  | 0.616629899 |
| ENSG00000165810 | 20.47072989 | -2.122717669 | 0.455208502 | -4.663176672 | 3.11E-06    | 2.49E-05    |
| ENSG00000165813 | 136.1454209 | 0.142964967  | 0.164324924 | 0.870013893  | 0.384292812 | 0.553430504 |
| ENSG00000165819 | 306.644719  | 0.150496689  | 0.111654917 | 1.347873363  | 0.177699117 | 0.323250388 |
| ENSG00000165821 | 350.6414572 | -0.326547679 | 0.103658376 | -3.150229541 | 0.001631422 | 0.006869481 |
| ENSG00000165832 | 176.3988198 | 0.005756045  | 0.139321906 | 0.041314718  | 0.967045    | 0.982799821 |
| ENSG00000165861 | 74.23375025 | -0.112348603 | 0.203079939 | -0.553223543 | 0.580110348 | 0.723117407 |
| ENSG00000165868 | 25.18266241 | -1.394975205 | 0.367843091 | -3.792310468 | 0.000149252 | 0.000824762 |
| ENSG00000165879 | 37.01852838 | 0.157404297  | 0.29327052  | 0.536720491  | 0.591460699 | 0.732133279 |
| ENSG00000165886 | 86.34144738 | -0.180531351 | 0.194478226 | -0.928285675 | 0.353259403 | 0.52460864  |
| ENSG00000165891 | 144.6307284 | -0.724144431 | 0.158074824 | -4.581023157 | 4.63E-06    | 3.56E-05    |
| ENSG00000165898 | 75.0393213  | 0.048808768  | 0.211999173 | 0.230230934  | 0.817912326 | 0.892592996 |
| ENSG00000165905 | 91.9267616  | -3.283762014 | 0.258815869 | -12.68763782 | 6.92E-37    | 4.82E-35    |
| ENSG00000165912 | 467.9814782 | -0.031591615 | 0.101120799 | -0.312414608 | 0.75472545  | 0.851673232 |
| ENSG00000165914 | 236.8509749 | 0.142296929  | 0.121528366 | 1.17089477   | 0.241641078 | 0.404279683 |
| ENSG00000165915 | 93.80069621 | 0.564099697  | 0.185279052 | 3.044595115  | 0.002329937 | 0.009305838 |
| ENSG00000165916 | 794.9104827 | 0.595049955  | 0.085643129 | 6.948017457  | 3.70E-12    | 6.92E-11    |
| ENSG00000165923 | 9.161822677 | 0.277653644  | 0.606177469 | 0.458040192  | 0.646923566 | 0.772538913 |
| ENSG00000165934 | 1265.841972 | 0.012959874  | 0.071609972 | 0.180978617  | 0.85638436  | 0.917757792 |
| ENSG00000165943 | 118.1573469 | 0.073356541  | 0.163293058 | 0.449232455  | 0.653263978 | 0.77746328  |

|                 |             |              |             |              |             |             |
|-----------------|-------------|--------------|-------------|--------------|-------------|-------------|
| ENSG00000165948 | 40.17373605 | 0.316749032  | 0.283089677 | 1.118899975  | 0.263182814 | 0.429725559 |
| ENSG00000165949 | 34.1242194  | 3.211028496  | 0.415692434 | 7.724529556  | 1.12E-14    | 2.64E-13    |
| ENSG00000165959 | 25.52682918 | 0.226237585  | 0.354096644 | 0.638914797  | 0.522878361 | 0.676628438 |
| ENSG00000165983 | 161.7356922 | -0.105749388 | 0.162743966 | -0.649789917 | 0.515827933 | 0.671096242 |
| ENSG00000165995 | 21.77994667 | 1.692346011  | 0.394302315 | 4.292001209  | 1.77E-05    | 0.000120218 |
| ENSG00000165996 | 26.44436238 | -0.082805961 | 0.350460186 | -0.236277797 | 0.813217114 | 0.890235667 |
| ENSG00000165997 | 445.8438778 | -0.082912985 | 0.094832685 | -0.874308106 | 0.381950486 | 0.551414026 |
| ENSG00000166004 | 686.7351116 | -0.063319351 | 0.081551609 | -0.776432885 | 0.437493434 | 0.603314879 |
| ENSG00000166012 | 701.8517117 | -0.054198533 | 0.084847685 | -0.638774453 | 0.52296967  | 0.676628438 |
| ENSG00000166016 | 66.74478654 | 0.0730881    | 0.231523838 | 0.315682827  | 0.752243262 | 0.850101457 |
| ENSG00000166024 | 89.37421101 | -0.332408928 | 0.196495701 | -1.691685502 | 0.090705954 | 0.194585605 |
| ENSG00000166025 | 693.057299  | -0.20773302  | 0.081704073 | -2.542505084 | 0.0110061   | 0.034981948 |
| ENSG00000166033 | 85.66112946 | 1.353497719  | 0.214157809 | 6.320095089  | 2.61E-10    | 3.91E-09    |
| ENSG00000166037 | 371.6114909 | -0.202395163 | 0.100800898 | -2.007870622 | 0.044657042 | 0.111539379 |
| ENSG00000166046 | 17.42982789 | 0.381883642  | 0.4107207   | 0.92978913   | 0.352480276 | 0.523890639 |
| ENSG00000166068 | 359.4832617 | -0.080555587 | 0.101445652 | -0.794076292 | 0.427151019 | 0.594372497 |
| ENSG00000166073 | 131.9098669 | 0.8484923    | 0.170324289 | 4.981628304  | 6.31E-07    | 5.83E-06    |
| ENSG00000166086 | 572.4276383 | 0.409967638  | 0.108988117 | 3.761581087  | 0.000168843 | 0.000918564 |
| ENSG00000166105 | 13.9024594  | 0.802603698  | 0.48275937  | 1.662533653  | 0.096405822 | 0.203824891 |
| ENSG00000166123 | 286.8558265 | -0.113212128 | 0.131600807 | -0.860269256 | 0.389640636 | 0.558099522 |
| ENSG00000166128 | 135.4851044 | -0.086849912 | 0.160204518 | -0.542118994 | 0.587736535 | 0.729570925 |
| ENSG00000166130 | 111.7763903 | -0.164024194 | 0.17963375  | -0.913103435 | 0.361188144 | 0.532159624 |
| ENSG00000166133 | 84.15220685 | -0.282064455 | 0.19772006  | -1.426584915 | 0.153699575 | 0.290346682 |
| ENSG00000166135 | 483.1446785 | -0.238617154 | 0.104772375 | -2.277481576 | 0.022757484 | 0.064088687 |
| ENSG00000166136 | 31.6613166  | 0.083061567  | 0.319588907 | 0.259901283  | 0.794939922 | 0.87776105  |
| ENSG00000166140 | 203.8227781 | -0.587319812 | 0.137579003 | -4.268964012 | 1.96E-05    | 0.000132053 |
| ENSG00000166145 | 11.13643587 | -0.799300715 | 0.540573688 | -1.478615651 | 0.139243067 | 0.269823061 |
| ENSG00000166147 | 747.0016146 | -0.459871862 | 0.082268281 | -5.589904852 | 2.27E-08    | 2.65E-07    |
| ENSG00000166148 | 28.22079323 | -0.085244943 | 0.326954188 | -0.260724426 | 0.794305028 | 0.877449453 |
| ENSG00000166153 | 15.82711321 | -0.471569631 | 0.441052939 | -1.069190544 | 0.284983819 | 0.454543852 |
| ENSG00000166164 | 956.1335576 | 0.226749405  | 0.077443107 | 2.927948196  | 0.003412069 | 0.012908519 |
| ENSG00000166165 | 378.8719013 | -1.598429222 | 0.113692906 | -14.05918175 | 6.77E-45    | 6.02E-43    |
| ENSG00000166166 | 42.96924332 | 0.193512836  | 0.267884004 | 0.722375479  | 0.470063658 | 0.631985472 |
| ENSG00000166167 | 171.4822327 | -0.685032117 | 0.144453546 | -4.742231241 | 2.11E-06    | 1.75E-05    |
| ENSG00000166169 | 139.9398058 | -0.021055964 | 0.151431785 | -0.139045869 | 0.889413903 | 0.939574317 |
| ENSG00000166170 | 448.4307193 | 0.148493317  | 0.097089949 | 1.529440666  | 0.126155238 | 0.25112853  |
| ENSG00000166171 | 98.11460318 | -0.026169289 | 0.184215038 | -0.142058378 | 0.887033894 | 0.938194798 |
| ENSG00000166173 | 120.7672813 | 0.144550831  | 0.167751436 | 0.861696533  | 0.388854534 | 0.557325353 |
| ENSG00000166181 | 606.0722151 | -0.104965409 | 0.085230746 | -1.231543954 | 0.218119488 | 0.375127741 |
| ENSG00000166188 | 100.1118798 | 0.220204477  | 0.201754576 | 1.09144725   | 0.275076131 | 0.443440701 |
| ENSG00000166189 | 68.39100439 | -0.057569449 | 0.212685662 | -0.270678562 | 0.786638267 | 0.87229218  |
| ENSG00000166192 | 19.67032701 | -0.102527782 | 0.396519171 | -0.258569547 | 0.795967383 | 0.878339214 |
| ENSG00000166197 | 2987.356751 | 0.056178234  | 0.057735568 | 0.973026425  | 0.330540169 | 0.502826267 |
| ENSG00000166199 | 42.49285871 | -0.007395018 | 0.266635885 | -0.027734518 | 0.977873893 | 0.988629033 |
| ENSG00000166200 | 659.6773934 | 0.104328967  | 0.092200577 | 1.131543536  | 0.25782639  | 0.423501457 |
| ENSG00000166224 | 168.3913463 | -0.194421726 | 0.14239034  | -1.365413737 | 0.172123049 | 0.315394269 |
| ENSG00000166225 | 181.7339677 | -0.09049308  | 0.137748746 | -0.65694304  | 0.511217542 | 0.667447979 |
| ENSG00000166226 | 1201.730628 | 0.327483475  | 0.072597234 | 4.510963534  | 6.45E-06    | 4.82E-05    |
| ENSG00000166228 | 1089.707982 | 0.620956926  | 0.071495749 | 8.685228603  | 3.78E-18    | 1.15E-16    |
| ENSG00000166233 | 456.4575145 | -0.268172319 | 0.096166146 | -2.788635409 | 0.005293062 | 0.018770925 |

|                 |             |              |             |              |             |             |
|-----------------|-------------|--------------|-------------|--------------|-------------|-------------|
| ENSG00000166250 | 71.65183831 | 0.888141192  | 0.21345511  | 4.160786746  | 3.17E-05    | 0.000204266 |
| ENSG00000166260 | 289.5068975 | -0.015325737 | 0.120718779 | -0.126954041 | 0.898976774 | 0.945345616 |
| ENSG00000166261 | 71.22364536 | 0.27086108   | 0.21675752  | 1.249604077  | 0.211444213 | 0.366375183 |
| ENSG00000166262 | 18.78548396 | -0.415773738 | 0.400185714 | -1.038951976 | 0.298827072 | 0.469270417 |
| ENSG00000166263 | 203.9369403 | -0.163741533 | 0.137986644 | -1.186647697 | 0.235366614 | 0.396426238 |
| ENSG00000166266 | 367.6380736 | -0.237156072 | 0.105562065 | -2.246603197 | 0.024665398 | 0.068517043 |
| ENSG00000166272 | 138.3743628 | -0.299717085 | 0.161789591 | -1.852511548 | 0.063952401 | 0.148191913 |
| ENSG00000166275 | 73.74626113 | 0.107231419  | 0.214128253 | 0.500781273  | 0.616525066 | 0.750779831 |
| ENSG00000166278 | 14.77082762 | -0.026564346 | 0.445480946 | -0.059630711 | 0.952449758 | 0.973872598 |
| ENSG00000166289 | 29.57534813 | -0.060043882 | 0.321048958 | -0.187024067 | 0.851641763 | 0.914883133 |
| ENSG00000166295 | 280.058658  | -0.4332984   | 0.120083766 | -3.608301234 | 0.000308209 | 0.001576048 |
| ENSG00000166311 | 130.5862748 | 0.444592373  | 0.159413728 | 2.788921497  | 0.005288388 | 0.018763827 |
| ENSG00000166313 | 75.49940114 | 0.133781159  | 0.215251709 | 0.621510322  | 0.534263905 | 0.685370327 |
| ENSG00000166326 | 927.9775438 | -0.268847783 | 0.087451432 | -3.074252478 | 0.002110308 | 0.008530501 |
| ENSG00000166333 | 386.0917945 | -0.12629088  | 0.105115985 | -1.201443151 | 0.229579346 | 0.388542298 |
| ENSG00000166337 | 40.35353636 | -0.093434562 | 0.315560008 | -0.296091265 | 0.767160385 | 0.859834192 |
| ENSG00000166340 | 474.9747982 | 0.227597025  | 0.104245595 | 2.183277144  | 0.029015407 | 0.078395733 |
| ENSG00000166341 | 29.81169913 | -0.604386383 | 0.335682263 | -1.800471605 | 0.071786203 | 0.162035604 |
| ENSG00000166343 | 14.94148521 | -0.1344745   | 0.45035959  | -0.298593619 | 0.765250134 | 0.858571124 |
| ENSG00000166347 | 26.41475488 | -0.018504621 | 0.337314665 | -0.054858632 | 0.956251089 | 0.976480012 |
| ENSG00000166348 | 217.4647965 | -0.273769382 | 0.130847456 | -2.092278984 | 0.036413567 | 0.094529915 |
| ENSG00000166352 | 36.02017075 | -0.889432676 | 0.296105193 | -3.003772636 | 0.002666545 | 0.010445332 |
| ENSG00000166377 | 162.2773323 | -0.134553721 | 0.146389821 | -0.919146701 | 0.358018845 | 0.529316947 |
| ENSG00000166387 | 35.6622008  | -1.503956679 | 0.316283788 | -4.755086203 | 1.98E-06    | 1.65E-05    |
| ENSG00000166394 | 11.20361769 | -5.78540161  | 1.251262787 | -4.623650341 | 3.77E-06    | 2.97E-05    |
| ENSG00000166398 | 165.4396606 | -0.41140348  | 0.141526928 | -2.906891893 | 0.003650393 | 0.013666598 |
| ENSG00000166401 | 35.59348337 | 0.992880354  | 0.293502074 | 3.382873389  | 0.000717317 | 0.003343116 |
| ENSG00000166402 | 338.8145368 | 0.870481019  | 0.104447252 | 8.334168677  | 7.80E-17    | 2.13E-15    |
| ENSG00000166405 | 17.70710489 | -1.827850349 | 0.45324683  | -4.032792351 | 5.51E-05    | 0.00033488  |
| ENSG00000166411 | 621.1985086 | -0.010220266 | 0.089188852 | -0.114591294 | 0.90876908  | 0.951016631 |
| ENSG00000166426 | 478.0454932 | 1.982071988  | 0.108335474 | 18.29568756  | 8.96E-75    | 1.50E-72    |
| ENSG00000166432 | 100.9611251 | -0.407495704 | 0.17723137  | -2.299230116 | 0.021491876 | 0.061211756 |
| ENSG00000166435 | 143.3427615 | -0.209688609 | 0.153134802 | -1.369307346 | 0.170903223 | 0.313964485 |
| ENSG00000166436 | 70.56719588 | 0.007376197  | 0.218956247 | 0.033687995  | 0.973125952 | 0.986326593 |
| ENSG00000166439 | 489.1405532 | -0.057660684 | 0.092131819 | -0.625849834 | 0.531413442 | 0.683156819 |
| ENSG00000166441 | 4873.072197 | 0.058721646  | 0.056320183 | 1.042639474  | 0.2971153   | 0.467627856 |
| ENSG00000166444 | 267.3286939 | -0.365044563 | 0.118827856 | -3.072045354 | 0.002125974 | 0.008581483 |
| ENSG00000166448 | 22.09226841 | 0.903326842  | 0.382782856 | 2.359893675  | 0.018280174 | 0.053675083 |
| ENSG00000166450 | 201.4659436 | -0.186859059 | 0.138410774 | -1.350032612 | 0.177005522 | 0.322155555 |
| ENSG00000166451 | 221.612592  | -0.058645805 | 0.135230795 | -0.433671967 | 0.664526666 | 0.785491334 |
| ENSG00000166452 | 105.1366093 | 0.397608134  | 0.182417699 | 2.17965765   | 0.029282848 | 0.078905844 |
| ENSG00000166454 | 249.9962459 | -0.362166229 | 0.126564756 | -2.861509311 | 0.004216291 | 0.015496139 |
| ENSG00000166471 | 618.5530562 | -0.055362714 | 0.093461276 | -0.592359916 | 0.553609602 | 0.700906181 |
| ENSG00000166477 | 684.7656648 | -0.079831151 | 0.080718473 | -0.989007201 | 0.322659619 | 0.494426426 |
| ENSG00000166478 | 143.1334154 | 0.128141987  | 0.155186485 | 0.82572904   | 0.408957815 | 0.577621114 |
| ENSG00000166479 | 288.3028632 | 0.054944389  | 0.111939585 | 0.490839669  | 0.623539851 | 0.755725995 |
| ENSG00000166483 | 209.3931338 | -0.278883137 | 0.130130884 | -2.143097226 | 0.032105292 | 0.08500496  |
| ENSG00000166484 | 135.0138921 | 0.020891724  | 0.156463678 | 0.133524435  | 0.893778641 | 0.942419199 |
| ENSG00000166503 | 1129.665002 | -0.307222239 | 0.07370266  | -4.168400934 | 3.07E-05    | 0.000197834 |
| ENSG00000166508 | 1694.996235 | 0.24390147   | 0.072464097 | 3.365825025  | 0.000763151 | 0.003528631 |

|                 |             |              |             |              |             |             |
|-----------------|-------------|--------------|-------------|--------------|-------------|-------------|
| ENSG00000166526 | 168.1882961 | -0.517433695 | 0.14205749  | -3.642424592 | 0.000270082 | 0.00139891  |
| ENSG00000166529 | 49.48034635 | -0.358548169 | 0.247159408 | -1.450675788 | 0.14687016  | 0.280754828 |
| ENSG00000166532 | 227.2422542 | -0.817060261 | 0.135405074 | -6.034192367 | 1.60E-09    | 2.17E-08    |
| ENSG00000166548 | 143.8970965 | 0.149610005  | 0.14852245  | 1.007322495  | 0.313779823 | 0.484998369 |
| ENSG00000166557 | 508.1415334 | 0.609742645  | 0.091031909 | 6.698119912  | 2.11E-11    | 3.59E-10    |
| ENSG00000166562 | 123.7856726 | 0.519007547  | 0.16357727  | 3.172858589  | 0.00150946  | 0.006423323 |
| ENSG00000166575 | 293.5822905 | -0.446191001 | 0.119357168 | -3.738284085 | 0.000185281 | 0.000999476 |
| ENSG00000166578 | 14.17844204 | -1.70257636  | 0.498503213 | -3.415376903 | 0.000636938 | 0.003005398 |
| ENSG00000166579 | 271.8862915 | 0.302994153  | 0.118503606 | 2.556834877  | 0.010562934 | 0.033745176 |
| ENSG00000166582 | 384.635715  | 0.148117209  | 0.106332615 | 1.392961221  | 0.163631518 | 0.304199567 |
| ENSG00000166595 | 386.5377933 | 0.387127341  | 0.115618742 | 3.348309576  | 0.000813061 | 0.003734818 |
| ENSG00000166598 | 4593.727996 | 0.573214859  | 0.05738633  | 9.988700483  | 1.71E-23    | 6.91E-22    |
| ENSG00000166619 | 173.7677661 | 0.085988342  | 0.14850116  | 0.579041548  | 0.562561139 | 0.708853276 |
| ENSG00000166669 | 115.4803491 | -0.148965514 | 0.178636489 | -0.833903057 | 0.404335615 | 0.572415298 |
| ENSG00000166670 | 28.68219734 | -1.458414019 | 0.365414293 | -3.991124718 | 6.58E-05    | 0.000394255 |
| ENSG00000166681 | 1264.803057 | 0.548493756  | 0.075486259 | 7.266140366  | 3.70E-13    | 7.68E-12    |
| ENSG00000166685 | 502.9248335 | 0.346538357  | 0.100136577 | 3.460657123  | 0.000538859 | 0.002589582 |
| ENSG00000166689 | 24.14379186 | -0.790225846 | 0.379034    | -2.084841589 | 0.037083682 | 0.0958268   |
| ENSG00000166704 | 33.37729126 | -0.446152992 | 0.298793056 | -1.493183937 | 0.135389046 | 0.264434083 |
| ENSG00000166710 | 1937.20014  | 1.036558541  | 0.080481592 | 12.87944884  | 5.88E-38    | 4.30E-36    |
| ENSG00000166716 | 891.7853258 | 0.26272465   | 0.07423322  | 3.539178953  | 0.000401374 | 0.00199015  |
| ENSG00000166734 | 700.2599898 | 0.089347487  | 0.082533737 | 1.082557143  | 0.279005039 | 0.447804363 |
| ENSG00000166747 | 771.9599159 | 0.253050124  | 0.080677239 | 3.136573928  | 0.001709343 | 0.007156824 |
| ENSG00000166750 | 21.29047578 | -1.936782771 | 0.434793881 | -4.45448488  | 8.41E-06    | 6.13E-05    |
| ENSG00000166762 | 28.70404722 | -0.379680662 | 0.343481578 | -1.105388719 | 0.26899119  | 0.436217876 |
| ENSG00000166770 | 44.62844551 | -0.422179817 | 0.286179822 | -1.475225661 | 0.140151885 | 0.271135315 |
| ENSG00000166780 | 46.02781378 | -0.477575243 | 0.262852598 | -1.816893756 | 0.069233383 | 0.157734668 |
| ENSG00000166783 | 324.1003553 | 0.022003579  | 0.112029867 | 0.196408152  | 0.844290716 | 0.90976923  |
| ENSG00000166788 | 149.6681006 | 0.118719193  | 0.148078557 | 0.80173116   | 0.422708487 | 0.590003496 |
| ENSG00000166794 | 2793.070845 | 0.836852134  | 0.068033212 | 12.30064132  | 8.99E-35    | 5.76E-33    |
| ENSG00000166797 | 207.02609   | -0.123070294 | 0.136412293 | -0.902193575 | 0.366954047 | 0.538227368 |
| ENSG00000166801 | 340.5553384 | 0.036249317  | 0.11183002  | 0.32414657   | 0.745827071 | 0.845033294 |
| ENSG00000166803 | 45.54850496 | -0.449956342 | 0.269567963 | -1.669175881 | 0.095082529 | 0.201816905 |
| ENSG00000166813 | 211.2498165 | 0.241088411  | 0.130251981 | 1.850938539  | 0.064178396 | 0.148642032 |
| ENSG00000166816 | 21.60395737 | 0.398094365  | 0.38282015  | 1.039899194  | 0.298386737 | 0.468998377 |
| ENSG00000166821 | 17.46929289 | 1.082324158  | 0.423855916 | 2.553519054  | 0.010664044 | 0.034029494 |
| ENSG00000166822 | 167.7020589 | -0.131970279 | 0.14734357  | -0.895663645 | 0.370432432 | 0.541536387 |
| ENSG00000166823 | 49.056999   | 0.273623832  | 0.262752741 | 1.041373843  | 0.297702077 | 0.468341481 |
| ENSG00000166831 | 979.0657027 | 0.183319715  | 0.089225706 | 2.054561668  | 0.039921361 | 0.101681843 |
| ENSG00000166839 | 23.0196221  | 0.23078008   | 0.371497475 | 0.621215742  | 0.534457683 | 0.685493706 |
| ENSG00000166845 | 109.3753539 | -0.153105578 | 0.176862299 | -0.86567674  | 0.386667459 | 0.555483514 |
| ENSG00000166847 | 334.2590362 | 0.243118705  | 0.106003569 | 2.29349547   | 0.021819496 | 0.061967519 |
| ENSG00000166848 | 686.4984089 | 0.33212735   | 0.080153858 | 4.143622782  | 3.42E-05    | 0.000218577 |
| ENSG00000166851 | 824.6070574 | 0.199130978  | 0.091549583 | 2.175116158  | 0.029621413 | 0.07968058  |
| ENSG00000166855 | 510.32851   | 0.164735407  | 0.093519875 | 1.761501581  | 0.078153546 | 0.173384329 |
| ENSG00000166860 | 273.8685517 | -0.158231899 | 0.118399157 | -1.336427576 | 0.181409558 | 0.328045837 |
| ENSG00000166881 | 410.2702831 | -0.272120557 | 0.106672882 | -2.550981585 | 0.010742    | 0.034239364 |
| ENSG00000166886 | 392.9587408 | 0.250098617  | 0.126528111 | 1.976624918  | 0.048084043 | 0.118352297 |
| ENSG00000166887 | 283.6727074 | -0.266123296 | 0.115125851 | -2.311585922 | 0.020800513 | 0.059653901 |
| ENSG00000166888 | 650.5773197 | 0.182833824  | 0.082824335 | 2.207489178  | 0.027279902 | 0.07456719  |

|                 |             |              |             |              |             |             |
|-----------------|-------------|--------------|-------------|--------------|-------------|-------------|
| ENSG00000166889 | 547.9665134 | 0.069218809  | 0.103155547 | 0.671013932  | 0.502211654 | 0.660354498 |
| ENSG00000166896 | 33.53597936 | -0.055586219 | 0.301569483 | -0.184323091 | 0.85376     | 0.916177748 |
| ENSG00000166897 | 5.611204109 | -2.852808913 | 0.940083701 | -3.034632886 | 0.002408286 | 0.009575205 |
| ENSG00000166900 | 150.9161873 | -0.329855411 | 0.150346661 | -2.193965658 | 0.028237879 | 0.07670808  |
| ENSG00000166902 | 271.7666283 | -0.375373269 | 0.115512548 | -3.24963196  | 0.001155545 | 0.00509317  |
| ENSG00000166908 | 163.5742862 | -0.161236419 | 0.145936509 | -1.104839499 | 0.269229142 | 0.436452597 |
| ENSG00000166912 | 222.487803  | -0.389560897 | 0.127670536 | -3.051298357 | 0.00227854  | 0.009139536 |
| ENSG00000166913 | 1469.657192 | -0.007197012 | 0.072974946 | -0.098623047 | 0.92143757  | 0.956727767 |
| ENSG00000166924 | 21.41827627 | -1.007987367 | 0.396257251 | -2.54377015  | 0.010966322 | 0.034875238 |
| ENSG00000166925 | 225.5208523 | 0.319798603  | 0.134744454 | 2.373371173  | 0.017626541 | 0.05212632  |
| ENSG00000166938 | 237.8411589 | -0.145658355 | 0.119930468 | -1.214523366 | 0.224547933 | 0.382778461 |
| ENSG00000166946 | 51.55831413 | -0.245181702 | 0.240679067 | -1.018708047 | 0.308341591 | 0.479653857 |
| ENSG00000166949 | 322.2898712 | -0.227845594 | 0.109252598 | -2.085493594 | 0.037024519 | 0.095691521 |
| ENSG00000166963 | 1221.633039 | -0.067323078 | 0.075808875 | -0.888063285 | 0.37450671  | 0.54453973  |
| ENSG00000166965 | 220.5087811 | 0.484579709  | 0.134422072 | 3.604911779  | 0.000312259 | 0.001592702 |
| ENSG00000166971 | 43.87635171 | 0.217233661  | 0.265635198 | 0.817789443  | 0.413477427 | 0.581859088 |
| ENSG00000166974 | 308.8072313 | 0.09387802   | 0.122269872 | 0.767793553  | 0.442609845 | 0.607577494 |
| ENSG00000166986 | 909.2685597 | -0.480174499 | 0.074692068 | -6.428721467 | 1.29E-10    | 2.01E-09    |
| ENSG00000166987 | 1160.681719 | 0.268915416  | 0.092012561 | 2.922594635  | 0.003471281 | 0.013104296 |
| ENSG00000166997 | 68.95664793 | -0.120154847 | 0.21347069  | -0.562863438 | 0.573527878 | 0.718098414 |
| ENSG00000167004 | 1984.455572 | 0.341375665  | 0.067100497 | 5.087528077  | 3.63E-07    | 3.51E-06    |
| ENSG00000167005 | 261.8241237 | 0.071100357  | 0.116434384 | 0.610647424  | 0.541433019 | 0.691142874 |
| ENSG00000167037 | 6.482527006 | -2.107341906 | 0.814298695 | -2.587922491 | 0.00965567  | 0.031353029 |
| ENSG00000167065 | 15.03547585 | -0.531866379 | 0.445374656 | -1.19419992  | 0.232399774 | 0.392322993 |
| ENSG00000167074 | 48.51017627 | -0.611932471 | 0.257721093 | -2.374398095 | 0.017577588 | 0.052014403 |
| ENSG00000167081 | 1516.480324 | 0.298898873  | 0.064558716 | 4.62987634   | 3.66E-06    | 2.89E-05    |
| ENSG00000167085 | 1846.238031 | 0.253087079  | 0.06704488  | 3.774890446  | 0.000160078 | 0.000877638 |
| ENSG00000167088 | 2347.951009 | 0.123047328  | 0.068241472 | 1.803116557  | 0.071369911 | 0.16145361  |
| ENSG00000167100 | 48.78750782 | -0.074424946 | 0.260610981 | -0.285578705 | 0.775200816 | 0.865324687 |
| ENSG00000167103 | 16.49453934 | -0.362146764 | 0.435453811 | -0.831653678 | 0.405604454 | 0.573801237 |
| ENSG00000167106 | 161.0209841 | 0.26432872   | 0.141793437 | 1.864181626  | 0.062296203 | 0.145120192 |
| ENSG00000167107 | 148.9881972 | -1.384823164 | 0.165451843 | -8.369947037 | 5.76E-17    | 1.60E-15    |
| ENSG00000167110 | 768.890614  | 0.446793482  | 0.095381837 | 4.684261654  | 2.81E-06    | 2.27E-05    |
| ENSG00000167112 | 291.2884225 | 0.140761699  | 0.116394006 | 1.209355224  | 0.226526403 | 0.384905816 |
| ENSG00000167113 | 189.2019564 | -0.00168751  | 0.132951441 | -0.012692679 | 0.989872979 | 0.994759318 |
| ENSG00000167114 | 180.0100481 | 0.197140256  | 0.142662015 | 1.38186928   | 0.167011842 | 0.308930122 |
| ENSG00000167118 | 176.2414445 | 0.197607238  | 0.137031619 | 1.442055776  | 0.149286639 | 0.283979396 |
| ENSG00000167123 | 390.707458  | 0.352393699  | 0.110235352 | 3.19673946   | 0.001389904 | 0.00598528  |
| ENSG00000167130 | 103.3570747 | 0.059906864  | 0.195866076 | 0.305856251  | 0.759714098 | 0.855077995 |
| ENSG00000167136 | 154.928105  | 0.115357783  | 0.145575798 | 0.792424182  | 0.428113384 | 0.595302146 |
| ENSG00000167157 | 311.0108067 | 4.887567047  | 0.198832706 | 24.58130324  | 2.00E-133   | 8.27E-131   |
| ENSG00000167173 | 441.8716843 | 0.33696517   | 0.104654521 | 3.21978609   | 0.001282863 | 0.005573943 |
| ENSG00000167182 | 391.0138842 | 0.168319136  | 0.10105661  | 1.66559255   | 0.095794596 | 0.203021323 |
| ENSG00000167186 | 115.902305  | 0.152591615  | 0.167143285 | 0.912938951  | 0.36127465  | 0.532231254 |
| ENSG00000167191 | 81.04921819 | 0.578991794  | 0.218229895 | 2.653127768  | 0.007974968 | 0.026696053 |
| ENSG00000167193 | 458.673251  | 0.089517529  | 0.10144803  | 0.882397901  | 0.37756167  | 0.547045774 |
| ENSG00000167196 | 463.8828358 | -0.036190804 | 0.101759351 | -0.355650894 | 0.722102024 | 0.827735087 |
| ENSG00000167202 | 203.5146315 | -0.013181296 | 0.138828179 | -0.094946831 | 0.924357058 | 0.958686031 |
| ENSG00000167216 | 79.00859006 | -0.88661662  | 0.20575048  | -4.309183715 | 1.64E-05    | 0.00011206  |
| ENSG00000167220 | 82.3246509  | -0.232773811 | 0.201917919 | -1.152814035 | 0.248986722 | 0.413125028 |

|                 |             |              |             |              |             |             |
|-----------------|-------------|--------------|-------------|--------------|-------------|-------------|
| ENSG00000167232 | 90.46890245 | -2.671389211 | 0.236229394 | -11.3084539  | 1.19E-29    | 6.41E-28    |
| ENSG00000167257 | 311.0552694 | 0.323919587  | 0.107667038 | 3.008530675  | 0.002625143 | 0.010303264 |
| ENSG00000167258 | 1214.937348 | -0.074020017 | 0.067653596 | -1.09410322  | 0.27390971  | 0.442203161 |
| ENSG00000167264 | 91.11262407 | 0.424153263  | 0.193371433 | 2.193463923  | 0.028273971 | 0.076761591 |
| ENSG00000167272 | 121.4302847 | 0.040504006  | 0.162752208 | 0.248869162  | 0.80346199  | 0.883393126 |
| ENSG00000167280 | 110.8710116 | -0.150439063 | 0.181114887 | -0.830627816 | 0.406183916 | 0.57446427  |
| ENSG00000167283 | 54.00178852 | 0.037105062  | 0.250948326 | 0.147859371  | 0.882453753 | 0.935251839 |
| ENSG00000167291 | 963.4076667 | -0.226991048 | 0.079198078 | -2.866118133 | 0.004155391 | 0.015311554 |
| ENSG00000167302 | 100.4774783 | 0.156757379  | 0.207543064 | 0.755300498  | 0.4500687   | 0.615051564 |
| ENSG00000167311 | 38.59195118 | -3.179886255 | 0.392228859 | -8.107221535 | 5.18E-16    | 1.34E-14    |
| ENSG00000167315 | 118.3822836 | -0.315212175 | 0.164570852 | -1.915358467 | 0.055446804 | 0.132279425 |
| ENSG00000167323 | 206.3182182 | -0.392638755 | 0.133980836 | -2.930559084 | 0.003383526 | 0.012817798 |
| ENSG00000167325 | 645.592112  | 0.07303048   | 0.090623379 | 0.80586799   | 0.42031897  | 0.587952656 |
| ENSG00000167333 | 31.78853976 | 0.004435672  | 0.304940714 | 0.014546015  | 0.988394368 | 0.994126857 |
| ENSG00000167363 | 249.1120172 | -0.354656365 | 0.123874047 | -2.863040115 | 0.004195974 | 0.015433159 |
| ENSG00000167371 | 257.6705152 | -0.336411154 | 0.127009451 | -2.648709605 | 0.008079973 | 0.026972285 |
| ENSG00000167377 | 10.07203768 | 0.018226789  | 0.55578396  | 0.032794738  | 0.973838275 | 0.986408007 |
| ENSG00000167378 | 285.9132042 | -0.1030168   | 0.112086685 | -0.919081512 | 0.358052939 | 0.529316947 |
| ENSG00000167380 | 104.5160344 | 0.210855455  | 0.178425068 | 1.181759137  | 0.237301286 | 0.398728608 |
| ENSG00000167384 | 89.10524281 | -0.089671437 | 0.195236905 | -0.459295527 | 0.646021959 | 0.772115244 |
| ENSG00000167393 | 143.6520883 | 0.536867238  | 0.158078523 | 3.396206056  | 0.000683269 | 0.00320036  |
| ENSG00000167394 | 153.9945547 | 0.465914932  | 0.148753511 | 3.132127305  | 0.001735446 | 0.007246674 |
| ENSG00000167395 | 452.3177813 | -0.331706268 | 0.109213344 | -3.037232032 | 0.002387616 | 0.009501088 |
| ENSG00000167397 | 75.97027938 | 0.548428449  | 0.219521414 | 2.498291348  | 0.012479358 | 0.038946355 |
| ENSG00000167447 | 188.2776476 | -0.005508401 | 0.134325059 | -0.041007993 | 0.967289524 | 0.982880628 |
| ENSG00000167460 | 3039.129365 | -0.074030098 | 0.060205375 | -1.229626071 | 0.218837162 | 0.375933181 |
| ENSG00000167461 | 654.0909508 | 0.053040235  | 0.084966435 | 0.624249265  | 0.532463897 | 0.683998204 |
| ENSG00000167468 | 1664.285877 | -0.086441934 | 0.090552217 | -0.954608691 | 0.33977562  | 0.511611978 |
| ENSG00000167470 | 696.5368198 | -0.080725141 | 0.096392108 | -0.837466294 | 0.402330516 | 0.570658715 |
| ENSG00000167487 | 41.92791685 | 0.163119314  | 0.280081652 | 0.582399141  | 0.56029786  | 0.706952666 |
| ENSG00000167491 | 981.6409646 | 0.013057362  | 0.071728124 | 0.182039647  | 0.855551612 | 0.917119467 |
| ENSG00000167508 | 251.7274974 | -0.14400666  | 0.139099116 | -1.035280913 | 0.300537741 | 0.4708514   |
| ENSG00000167513 | 544.0827564 | -0.690874402 | 0.09192091  | -7.515965661 | 5.65E-14    | 1.26E-12    |
| ENSG00000167515 | 138.9883774 | -0.708672703 | 0.16865524  | -4.201901475 | 2.65E-05    | 0.000173032 |
| ENSG00000167522 | 2570.100368 | -1.054859812 | 0.063380312 | -16.64333585 | 3.38E-62    | 4.66E-60    |
| ENSG00000167523 | 98.36511846 | -0.227497749 | 0.183858082 | -1.23735517  | 0.215955254 | 0.372276561 |
| ENSG00000167524 | 66.13821083 | 0.287745039  | 0.213496946 | 1.34777122   | 0.177731977 | 0.3232683   |
| ENSG00000167525 | 47.97471857 | -0.700120495 | 0.277405844 | -2.523813072 | 0.011608964 | 0.036612285 |
| ENSG00000167526 | 5069.225728 | 0.169439042  | 0.058405243 | 2.901092979  | 0.003718635 | 0.013874016 |
| ENSG00000167528 | 247.3567375 | -0.659764421 | 0.130629385 | -5.05065854  | 4.40E-07    | 4.19E-06    |
| ENSG00000167535 | 80.14855618 | 0.260723312  | 0.197752022 | 1.318435629  | 0.18735786  | 0.335647987 |
| ENSG00000167536 | 60.92587924 | 0.240146491  | 0.226566726 | 1.059937157  | 0.28917319  | 0.459348163 |
| ENSG00000167543 | 105.9045757 | 0.173867273  | 0.365150388 | 0.476152507  | 0.633965732 | 0.763356475 |
| ENSG00000167548 | 3328.496006 | 0.031611678  | 0.061772689 | 0.511741982  | 0.6088316   | 0.745198811 |
| ENSG00000167549 | 29.00617162 | -0.569739862 | 0.330741256 | -1.722615042 | 0.084958163 | 0.18505308  |
| ENSG00000167550 | 17.67094096 | -0.049816939 | 0.427409496 | -0.116555526 | 0.907212282 | 0.950448309 |
| ENSG00000167552 | 725.217753  | 0.951435404  | 0.08198801  | 11.60456759  | 3.91E-31    | 2.22E-29    |
| ENSG00000167553 | 790.4164535 | 0.069475529  | 0.076817059 | 0.904428384  | 0.365768293 | 0.537105081 |
| ENSG00000167565 | 199.9549062 | -0.306871707 | 0.131619082 | -2.331513806 | 0.019726283 | 0.057111426 |
| ENSG00000167566 | 208.5724824 | -0.313624177 | 0.136380649 | -2.299623736 | 0.021469546 | 0.061163822 |

|                 |             |              |             |              |             |             |
|-----------------|-------------|--------------|-------------|--------------|-------------|-------------|
| ENSG00000167595 | 249.907934  | -0.108794794 | 0.124697629 | -0.872468822 | 0.38295267  | 0.55240667  |
| ENSG00000167600 | 11.05088503 | 0.11186408   | 0.516411378 | 0.216618154  | 0.828505937 | 0.899731186 |
| ENSG00000167601 | 316.4393186 | -0.282498385 | 0.113828956 | -2.48177965  | 0.013072809 | 0.040546201 |
| ENSG00000167604 | 52.7029426  | 0.091917611  | 0.244056354 | 0.376624535  | 0.706452652 | 0.815678152 |
| ENSG00000167613 | 217.4874498 | -0.024271484 | 0.128721602 | -0.188557967 | 0.850439279 | 0.914361666 |
| ENSG00000167615 | 1258.402894 | 0.27358694   | 0.073955052 | 3.699367838  | 0.000216137 | 0.00114829  |
| ENSG00000167617 | 87.05324122 | -0.644642072 | 0.20191668  | -3.192614256 | 0.001409912 | 0.006056583 |
| ENSG00000167619 | 52.48833915 | 0.18072821   | 0.253574204 | 0.71272317   | 0.476017076 | 0.637002178 |
| ENSG00000167625 | 101.7039352 | -0.070170545 | 0.177312183 | -0.395745759 | 0.692292595 | 0.806274442 |
| ENSG00000167632 | 564.3570229 | -0.162167908 | 0.08731469  | -1.857280922 | 0.063271197 | 0.146952795 |
| ENSG00000167635 | 1251.005728 | 0.127758804  | 0.074313437 | 1.719188468  | 0.08558006  | 0.186090263 |
| ENSG00000167637 | 78.83139579 | 0.197048704  | 0.203244147 | 0.96951724   | 0.332287183 | 0.504664078 |
| ENSG00000167641 | 97.28529518 | -0.145783531 | 0.186132901 | -0.783222796 | 0.43349629  | 0.599755973 |
| ENSG00000167645 | 140.3276318 | -0.347047394 | 0.158900926 | -2.184048914 | 0.028958654 | 0.078272506 |
| ENSG00000167646 | 122.567005  | 0.71413209   | 0.172194675 | 4.147236789  | 3.37E-05    | 0.000215549 |
| ENSG00000167654 | 15.17974811 | -3.934117313 | 0.735179985 | -5.351230167 | 8.74E-08    | 9.30E-07    |
| ENSG00000167657 | 268.9316813 | 0.089106227  | 0.131516032 | 0.677531288  | 0.498068926 | 0.6560741   |
| ENSG00000167658 | 27401.2865  | 0.071597173  | 0.057586458 | 1.24329877   | 0.213757757 | 0.369330285 |
| ENSG00000167670 | 1282.825092 | -0.208298534 | 0.07048205  | -2.955341608 | 0.00312323  | 0.011950971 |
| ENSG00000167671 | 303.6516395 | 0.36362156   | 0.116209776 | 3.129010088  | 0.001753963 | 0.007313124 |
| ENSG00000167674 | 1135.384359 | 0.025149487  | 0.070880586 | 0.354814882  | 0.722728278 | 0.828072115 |
| ENSG00000167676 | 16.47451803 | -0.403809795 | 0.456796437 | -0.884003821 | 0.37669415  | 0.546352372 |
| ENSG00000167680 | 166.1367743 | -3.079693318 | 0.191486311 | -16.08309907 | 3.35E-58    | 4.24E-56    |
| ENSG00000167685 | 150.7572774 | 0.316159154  | 0.14677025  | 2.154109249  | 0.031231605 | 0.08322857  |
| ENSG00000167693 | 335.2382022 | 0.145612364  | 0.105841805 | 1.375754738  | 0.168897579 | 0.311407528 |
| ENSG00000167695 | 207.2990296 | 0.188374661  | 0.131547795 | 1.431986453  | 0.152147698 | 0.288402768 |
| ENSG00000167699 | 347.2336457 | 0.199321868  | 0.107929598 | 1.846776713  | 0.064779508 | 0.149721576 |
| ENSG00000167700 | 65.8243547  | 0.4994491    | 0.234516848 | 2.129693897  | 0.033196893 | 0.087489073 |
| ENSG00000167702 | 155.5046149 | -0.050701127 | 0.175197445 | -0.289394213 | 0.772279723 | 0.863504996 |
| ENSG00000167703 | 82.26980441 | -0.399902874 | 0.197384447 | -2.026010054 | 0.042763754 | 0.107923546 |
| ENSG00000167705 | 90.45204073 | -0.195647474 | 0.188600923 | -1.037362228 | 0.299567075 | 0.470012141 |
| ENSG00000167716 | 298.4401369 | 0.57710896   | 0.11752974  | 4.910322777  | 9.09E-07    | 8.13E-06    |
| ENSG00000167720 | 44.27659539 | -0.472515907 | 0.264733588 | -1.784873275 | 0.074281874 | 0.166231877 |
| ENSG00000167721 | 933.0516699 | 0.227195435  | 0.075450609 | 3.011180934  | 0.002602337 | 0.010230908 |
| ENSG00000167723 | 21.66699893 | 0.509072006  | 0.376862973 | 1.350814601  | 0.17675483  | 0.32182438  |
| ENSG00000167733 | 37.53710617 | 0.331058911  | 0.287487145 | 1.151560748  | 0.249501619 | 0.413686171 |
| ENSG00000167740 | 112.0263915 | -0.106611621 | 0.173757809 | -0.613564484 | 0.539503159 | 0.689580557 |
| ENSG00000167747 | 278.0591437 | -0.098238667 | 0.11271116  | -0.871596627 | 0.383428471 | 0.552582306 |
| ENSG00000167748 | 30.01886695 | -0.310700479 | 0.332035902 | -0.935743626 | 0.349405203 | 0.521472045 |
| ENSG00000167766 | 158.868428  | 0.223205416  | 0.151456155 | 1.473729579  | 0.140554415 | 0.271652157 |
| ENSG00000167770 | 562.2278441 | -0.022671632 | 0.087638022 | -0.258696298 | 0.795869576 | 0.878339214 |
| ENSG00000167771 | 526.8601252 | -0.387280136 | 0.092191248 | -4.200834086 | 2.66E-05    | 0.000173667 |
| ENSG00000167772 | 32.92408385 | 0.563508943  | 0.314377694 | 1.792458412  | 0.073059565 | 0.164179315 |
| ENSG00000167775 | 254.4677354 | 0.585592904  | 0.122402514 | 4.784157486  | 1.72E-06    | 1.45E-05    |
| ENSG00000167778 | 118.4081824 | 0.730873785  | 0.168654102 | 4.333566617  | 1.47E-05    | 0.000101471 |
| ENSG00000167779 | 72.7921162  | -1.527207481 | 0.23637942  | -6.460830989 | 1.04E-10    | 1.64E-09    |
| ENSG00000167785 | 25.86128534 | -0.30904046  | 0.353139292 | -0.875123406 | 0.381506763 | 0.550886667 |
| ENSG00000167792 | 965.6706134 | -0.022563686 | 0.073800934 | -0.305737141 | 0.759804792 | 0.855077995 |
| ENSG00000167797 | 151.1160543 | -0.068765078 | 0.153203597 | -0.448847675 | 0.653541544 | 0.777595974 |
| ENSG00000167799 | 34.16586442 | 0.44096159   | 0.303004306 | 1.455298095  | 0.145586754 | 0.278876767 |

|                 |             |              |             |              |             |             |
|-----------------|-------------|--------------|-------------|--------------|-------------|-------------|
| ENSG00000167815 | 1329.279736 | 0.269017901  | 0.074430346 | 3.614357771  | 0.000301093 | 0.001543596 |
| ENSG00000167840 | 55.36449444 | -0.065306072 | 0.234796172 | -0.278139423 | 0.780905334 | 0.868723943 |
| ENSG00000167842 | 87.88338513 | -0.415083255 | 0.188523064 | -2.201763781 | 0.027681999 | 0.075460709 |
| ENSG00000167861 | 49.82935712 | 0.417221807  | 0.273496727 | 1.525509322  | 0.12713211  | 0.252311531 |
| ENSG00000167862 | 254.7179929 | 0.058323395  | 0.117905444 | 0.494662447  | 0.620838414 | 0.753970589 |
| ENSG00000167863 | 1115.057399 | 0.11027765   | 0.075250253 | 1.465478807  | 0.14279033  | 0.274914442 |
| ENSG00000167874 | 220.0465777 | 0.011884201  | 0.126606619 | 0.093867139  | 0.925214697 | 0.959079836 |
| ENSG00000167880 | 17.86003639 | 5.871728335  | 1.077452709 | 5.449639031  | 5.05E-08    | 5.58E-07    |
| ENSG00000167881 | 1132.095379 | 0.264846401  | 0.071605254 | 3.698700698  | 0.000216706 | 0.001150877 |
| ENSG00000167889 | 15.1888246  | -1.832664524 | 0.489660821 | -3.742722401 | 0.000182037 | 0.000984628 |
| ENSG00000167900 | 389.1913276 | 0.406049045  | 0.114580731 | 3.543781239  | 0.000394432 | 0.001959191 |
| ENSG00000167904 | 64.47486569 | -0.06560813  | 0.242955249 | -0.270042038 | 0.787127913 | 0.872399068 |
| ENSG00000167920 | 22.13508547 | -0.095315083 | 0.365285523 | -0.260933097 | 0.794144101 | 0.877406181 |
| ENSG00000167925 | 83.69197148 | 0.064891886  | 0.198757882 | 0.326487108  | 0.744055841 | 0.843563552 |
| ENSG00000167930 | 504.020546  | -0.156576679 | 0.093996244 | -1.665775907 | 0.095758057 | 0.202997185 |
| ENSG00000167962 | 647.4002263 | 0.423044271  | 0.085412409 | 4.952960319  | 7.31E-07    | 6.67E-06    |
| ENSG00000167964 | 37.88842873 | -0.308014384 | 0.295281347 | -1.043121712 | 0.296891926 | 0.467381025 |
| ENSG00000167965 | 508.0846076 | -0.248513579 | 0.090109068 | -2.757919773 | 0.005817047 | 0.020316276 |
| ENSG00000167967 | 313.7282373 | 0.496035564  | 0.109321183 | 4.537414914  | 5.69E-06    | 4.32E-05    |
| ENSG00000167969 | 172.0299217 | -0.190422345 | 0.148940781 | -1.278510456 | 0.201069501 | 0.353410009 |
| ENSG00000167971 | 163.9970624 | 0.754193663  | 0.150863329 | 4.999184797  | 5.76E-07    | 5.37E-06    |
| ENSG00000167972 | 1141.182187 | 0.298480199  | 0.083819124 | 3.56100358   | 0.00036944  | 0.001852079 |
| ENSG00000167977 | 234.9546908 | -0.260248476 | 0.131239585 | -1.983002895 | 0.047367106 | 0.116812806 |
| ENSG00000167978 | 14458.15586 | 0.119566867  | 0.048913341 | 2.44446332   | 0.014506783 | 0.044241594 |
| ENSG00000167981 | 42.07538829 | -0.16162669  | 0.266394278 | -0.606719827 | 0.544036862 | 0.692782685 |
| ENSG00000167985 | 51.71057787 | 0.121918536  | 0.254152856 | 0.479705551  | 0.63143678  | 0.761420933 |
| ENSG00000167986 | 1642.265985 | 0.180073959  | 0.068887358 | 2.614034922  | 0.008947989 | 0.029367384 |
| ENSG00000167987 | 214.2731758 | 0.094671117  | 0.142838342 | 0.662785044  | 0.507468234 | 0.664432322 |
| ENSG00000167992 | 67.12306435 | -0.413017013 | 0.216298648 | -1.909475701 | 0.056200753 | 0.133653282 |
| ENSG00000167994 | 20.00979468 | -0.225399119 | 0.416272967 | -0.541469509 | 0.588184008 | 0.72968478  |
| ENSG00000167996 | 1400.227684 | -0.231654455 | 0.071221952 | -3.252571005 | 0.00114366  | 0.005054761 |
| ENSG00000168000 | 76.1036723  | 0.042825181  | 0.201630206 | 0.212394667  | 0.831799146 | 0.901565015 |
| ENSG00000168002 | 161.4477972 | 0.112610937  | 0.143670129 | 0.78381594   | 0.433148119 | 0.599418388 |
| ENSG00000168003 | 459.199714  | -0.382880571 | 0.094611679 | -4.046863714 | 5.19E-05    | 0.000317625 |
| ENSG00000168005 | 219.1820068 | -0.34324431  | 0.133203637 | -2.57683887  | 0.009970842 | 0.032212607 |
| ENSG00000168010 | 215.9055651 | 0.51476482   | 0.133844021 | 3.846005336  | 0.000120059 | 0.000680029 |
| ENSG00000168014 | 246.1849092 | -0.070581692 | 0.127874242 | -0.551961765 | 0.580974549 | 0.723616731 |
| ENSG00000168016 | 18.79358165 | 2.167095001  | 0.449821053 | 4.817682471  | 1.45E-06    | 1.24E-05    |
| ENSG00000168026 | 32.51724072 | 0.133521357  | 0.322558964 | 0.41394403   | 0.678915097 | 0.796385835 |
| ENSG00000168028 | 3693.613912 | -0.059844506 | 0.061909628 | -0.966642957 | 0.333722552 | 0.505859576 |
| ENSG00000168036 | 1750.849265 | 0.053272217  | 0.074876071 | 0.711471858  | 0.476791884 | 0.63753861  |
| ENSG00000168038 | 96.30388746 | -0.36261233  | 0.181892201 | -1.993556224 | 0.046200573 | 0.114580006 |
| ENSG00000168040 | 188.1585437 | 0.495226444  | 0.149192397 | 3.319381253  | 0.000902172 | 0.004101231 |
| ENSG00000168056 | 676.7088603 | 0.085192718  | 0.089711719 | 0.94962753   | 0.342301545 | 0.514366687 |
| ENSG00000168061 | 127.406088  | -0.134791108 | 0.163725529 | -0.823274837 | 0.410351719 | 0.578821309 |
| ENSG00000168062 | 23.95858467 | -0.880469485 | 0.367175368 | -2.39795357  | 0.016486955 | 0.04930642  |
| ENSG00000168066 | 2498.493079 | 0.013587811  | 0.058979509 | 0.23038189   | 0.817795033 | 0.892584835 |
| ENSG00000168067 | 147.6850856 | 0.216158477  | 0.157781539 | 1.369985857  | 0.170691317 | 0.313791373 |
| ENSG00000168071 | 97.56444994 | -0.483854393 | 0.194304957 | -2.490180382 | 0.012767828 | 0.039731873 |
| ENSG00000168077 | 190.2741039 | -0.048241721 | 0.138200027 | -0.349071719 | 0.727035468 | 0.831311943 |



|                 |             |              |             |              |             |             |
|-----------------|-------------|--------------|-------------|--------------|-------------|-------------|
| ENSG00000168078 | 199.36062   | -0.423529906 | 0.133498413 | -3.172546365 | 0.001511084 | 0.006428286 |
| ENSG00000168090 | 1125.962236 | 0.177191775  | 0.073611592 | 2.407117828  | 0.016078981 | 0.048302277 |
| ENSG00000168092 | 1023.202733 | 0.09320684   | 0.07658031  | 1.217112328  | 0.223561481 | 0.381946986 |
| ENSG00000168096 | 84.14823736 | 0.16982801   | 0.196972026 | 0.862193545  | 0.388581021 | 0.557149904 |
| ENSG00000168101 | 61.8358833  | 0.738627144  | 0.237780723 | 3.106337363  | 0.001894205 | 0.00782125  |
| ENSG00000168116 | 126.4033302 | -0.203974876 | 0.161149235 | -1.265751436 | 0.205602087 | 0.359126152 |
| ENSG00000168118 | 312.868037  | -0.154582168 | 0.116359043 | -1.328492954 | 0.18401531  | 0.331393173 |
| ENSG00000168124 | 13.29901289 | -0.068858534 | 0.467822584 | -0.147189419 | 0.882982512 | 0.935529895 |
| ENSG00000168135 | 22.99989074 | -2.048041488 | 0.45237807  | -4.527278449 | 5.97E-06    | 4.51E-05    |
| ENSG00000168137 | 3039.921595 | -0.091965799 | 0.063726721 | -1.443127754 | 0.148984486 | 0.283575214 |
| ENSG00000168140 | 13.056674   | -0.09313685  | 0.500497014 | -0.186088723 | 0.852375185 | 0.915251049 |
| ENSG00000168148 | 6.070021872 | -0.472049608 | 0.746616695 | -0.63225161  | 0.527222478 | 0.680224298 |
| ENSG00000168152 | 26.39797081 | -0.225290843 | 0.341478964 | -0.659750284 | 0.509414092 | 0.665836024 |
| ENSG00000168159 | 559.8233747 | 0.030087674  | 0.090260822 | 0.33334146   | 0.738876546 | 0.840132657 |
| ENSG00000168172 | 523.4969324 | -0.282174487 | 0.088677524 | -3.182029397 | 0.00146247  | 0.006257482 |
| ENSG00000168175 | 1588.597131 | 0.338401806  | 0.068840566 | 4.91573246   | 8.85E-07    | 7.91E-06    |
| ENSG00000168209 | 410.3736648 | 0.135834563  | 0.102692231 | 1.322734567  | 0.185923664 | 0.334008612 |
| ENSG00000168214 | 815.4913638 | 0.224968004  | 0.08705637  | 2.584164768  | 0.009761515 | 0.031608355 |
| ENSG00000168216 | 25.27219025 | 1.140842392  | 0.359552926 | 3.17294704   | 0.001509    | 0.006423312 |
| ENSG00000168228 | 52.20995987 | 0.171318735  | 0.252200717 | 0.679295194  | 0.496950841 | 0.655435794 |
| ENSG00000168234 | 109.5962522 | 0.417447452  | 0.170291154 | 2.451374856  | 0.014231166 | 0.043495473 |
| ENSG00000168237 | 60.9889204  | 0.261672777  | 0.22735999  | 1.150918317  | 0.249765842 | 0.413789489 |
| ENSG00000168243 | 24.74663598 | -1.730324316 | 0.385157363 | -4.492512627 | 7.04E-06    | 5.22E-05    |
| ENSG00000168246 | 180.2547372 | -0.216321813 | 0.150825221 | -1.434254904 | 0.151499534 | 0.287449798 |
| ENSG00000168256 | 209.9509702 | -0.173064003 | 0.134657451 | -1.285216682 | 0.198716576 | 0.350564914 |
| ENSG00000168259 | 947.1339508 | 0.141816122  | 0.08121962  | 1.746082059  | 0.080796694 | 0.177919918 |
| ENSG00000168264 | 889.1488738 | 0.266165458  | 0.086890563 | 3.063226316  | 0.002189644 | 0.008818213 |
| ENSG00000168268 | 1384.791727 | -0.282353181 | 0.071077239 | -3.972483834 | 7.11E-05    | 0.000422998 |
| ENSG00000168273 | 84.6855896  | -0.096169977 | 0.197429583 | -0.487110265 | 0.626180192 | 0.757381067 |
| ENSG00000168275 | 243.6420955 | 0.484370437  | 0.125884596 | 3.847733983  | 0.000119215 | 0.000676067 |
| ENSG00000168280 | 22.17755013 | -0.84235646  | 0.377635612 | -2.230606526 | 0.025707204 | 0.070958753 |
| ENSG00000168282 | 361.5122654 | 0.127604246  | 0.109265319 | 1.167838498  | 0.242871916 | 0.405759015 |
| ENSG00000168283 | 190.3211835 | 0.651083794  | 0.150933348 | 4.313717308  | 1.61E-05    | 0.00011     |
| ENSG00000168286 | 239.0612999 | -0.013386977 | 0.128204925 | -0.104418585 | 0.916837174 | 0.955047222 |
| ENSG00000168288 | 121.6333651 | -0.20711146  | 0.162491572 | -1.274598168 | 0.202451506 | 0.355080074 |
| ENSG00000168291 | 616.5909811 | 0.218887457  | 0.089810788 | 2.437206738  | 0.014801214 | 0.044993001 |
| ENSG00000168297 | 131.2150112 | 0.406164533  | 0.166622396 | 2.437634693  | 0.014783705 | 0.044959236 |
| ENSG00000168298 | 5177.642526 | 0.057458729  | 0.074219522 | 0.774172713  | 0.438828663 | 0.604227552 |
| ENSG00000168300 | 188.0825183 | 0.083007777  | 0.143008512 | 0.580439413  | 0.561618333 | 0.707982834 |
| ENSG00000168301 | 46.02560701 | -0.025813535 | 0.262092112 | -0.098490317 | 0.92154296  | 0.956727767 |
| ENSG00000168303 | 80.84996806 | -0.470064907 | 0.206444989 | -2.276949951 | 0.022789215 | 0.064152324 |
| ENSG00000168310 | 193.5539517 | 0.089481934  | 0.138906462 | 0.64418842   | 0.519453259 | 0.674158727 |
| ENSG00000168374 | 608.1035025 | 0.256911552  | 0.088743173 | 2.895000761  | 0.003791576 | 0.01411616  |
| ENSG00000168385 | 1858.653561 | -0.192736508 | 0.06586597  | -2.926192504 | 0.003431385 | 0.012974608 |
| ENSG00000168386 | 37.70640522 | -3.094484458 | 0.395095319 | -7.832247833 | 4.79E-15    | 1.15E-13    |
| ENSG00000168389 | 59.17141884 | 0.355310209  | 0.230962127 | 1.53839166   | 0.12395288  | 0.248040784 |
| ENSG00000168393 | 366.3306871 | 0.229627938  | 0.100401249 | 2.287102401  | 0.022189847 | 0.062691226 |
| ENSG00000168394 | 89.27748754 | 0.550696126  | 0.196397691 | 2.803984724  | 0.00504753  | 0.018045978 |
| ENSG00000168395 | 296.2973364 | -0.202920123 | 0.110601584 | -1.834694545 | 0.066550961 | 0.152876754 |
| ENSG00000168397 | 218.8587157 | -0.238123323 | 0.125794608 | -1.892953339 | 0.058364075 | 0.137626349 |

|                 |             |              |             |              |             |             |
|-----------------|-------------|--------------|-------------|--------------|-------------|-------------|
| ENSG00000168404 | 65.64069838 | 0.613113598  | 0.225938289 | 2.713633001  | 0.006654985 | 0.022778404 |
| ENSG00000168405 | 23.52250334 | 0.718165941  | 0.368148305 | 1.950751727  | 0.051086587 | 0.123851999 |
| ENSG00000168411 | 624.6584889 | -0.23318791  | 0.086274386 | -2.702863747 | 0.006874492 | 0.023432659 |
| ENSG00000168434 | 336.8186231 | 0.209467372  | 0.109523149 | 1.912539713  | 0.055807004 | 0.132958104 |
| ENSG00000168438 | 202.5073398 | -0.010365179 | 0.133721369 | -0.07751326  | 0.938215243 | 0.966102042 |
| ENSG00000168439 | 2610.256019 | 0.303469765  | 0.059794775 | 5.075188683  | 3.87E-07    | 3.73E-06    |
| ENSG00000168453 | 8.715915438 | 0.845512293  | 0.58998599  | 1.433105713  | 0.151827629 | 0.28797228  |
| ENSG00000168461 | 210.5065813 | 0.173218413  | 0.141082834 | 1.227778094  | 0.219530281 | 0.376893407 |
| ENSG00000168476 | 190.6947833 | -0.085866379 | 0.135992228 | -0.631406517 | 0.527774756 | 0.680568444 |
| ENSG00000168477 | 40.67989096 | -0.477623763 | 0.292721674 | -1.631665179 | 0.102750039 | 0.214239246 |
| ENSG00000168487 | 260.1544357 | 0.320104996  | 0.123972239 | 2.582069977  | 0.009820967 | 0.031757625 |
| ENSG00000168488 | 3463.982775 | 0.119106952  | 0.057508943 | 2.07110315   | 0.038349158 | 0.098426935 |
| ENSG00000168490 | 20.59808432 | 0.121197417  | 0.406579778 | 0.298090125  | 0.765634379 | 0.858740507 |
| ENSG00000168495 | 356.2827196 | 0.113802314  | 0.104269638 | 1.091423318  | 0.275086657 | 0.443440701 |
| ENSG00000168496 | 605.7322544 | -0.028816592 | 0.091201686 | -0.315965566 | 0.752028644 | 0.849927297 |
| ENSG00000168502 | 130.1122099 | 0.179838695  | 0.156684645 | 1.147774852  | 0.251061521 | 0.41534109  |
| ENSG00000168517 | 41.87502608 | -0.098330307 | 0.278775903 | -0.352721689 | 0.724297098 | 0.829328442 |
| ENSG00000168522 | 113.9263294 | -0.005855016 | 0.166020007 | -0.035266932 | 0.971866891 | 0.985302874 |
| ENSG00000168528 | 11.06873087 | -1.034973596 | 0.536411692 | -1.929438921 | 0.053676396 | 0.12879951  |
| ENSG00000168538 | 150.4485589 | -0.168724572 | 0.152675477 | -1.105119011 | 0.269108024 | 0.436341904 |
| ENSG00000168542 | 8176.034926 | -0.226234284 | 0.058547598 | -3.864108759 | 0.000111496 | 0.000635653 |
| ENSG00000168556 | 271.7956561 | 0.312244455  | 0.116671195 | 2.676277154  | 0.007444505 | 0.025143777 |
| ENSG00000168564 | 90.69512966 | -0.147334369 | 0.200024987 | -0.736579823 | 0.461377909 | 0.624585702 |
| ENSG00000168566 | 126.814762  | -0.440623691 | 0.160794453 | -2.740291624 | 0.006138469 | 0.021253901 |
| ENSG00000168569 | 197.814175  | 0.002272621  | 0.133474324 | 0.017026651  | 0.986415354 | 0.992847269 |
| ENSG00000168575 | 200.4563781 | -0.076156887 | 0.135794744 | -0.560823524 | 0.574917849 | 0.719261758 |
| ENSG00000168591 | 109.6264482 | -0.207884878 | 0.179815974 | -1.156097947 | 0.247641096 | 0.411914088 |
| ENSG00000168610 | 265.2676853 | 0.151095138  | 0.116314261 | 1.299025047  | 0.193935334 | 0.34476587  |
| ENSG00000168612 | 149.6480665 | 0.130439675  | 0.145647469 | 0.895584908  | 0.370474499 | 0.541536387 |
| ENSG00000168615 | 653.6939069 | 0.129177861  | 0.083129363 | 1.553937824  | 0.120199248 | 0.242208986 |
| ENSG00000168631 | 9.855922697 | -0.912814578 | 0.608421681 | -1.500299226 | 0.13353691  | 0.2619091   |
| ENSG00000168646 | 61.34271914 | -0.263442174 | 0.2246521   | -1.17266731  | 0.240929246 | 0.40337701  |
| ENSG00000168653 | 696.3652227 | 0.193326746  | 0.170480565 | 1.134010471  | 0.256790156 | 0.422535821 |
| ENSG00000168661 | 33.43285163 | 0.140694262  | 0.3258933   | 0.431718794  | 0.665945806 | 0.786253443 |
| ENSG00000168671 | 24.7741066  | -2.335784709 | 0.43315023  | -5.392551007 | 6.95E-08    | 7.48E-07    |
| ENSG00000168679 | 25.13089823 | -2.721770401 | 0.44222021  | -6.154785189 | 7.52E-10    | 1.06E-08    |
| ENSG00000168701 | 155.6555747 | 0.522124505  | 0.149049184 | 3.50303499   | 0.000459989 | 0.002247817 |
| ENSG00000168702 | 1037.496008 | -0.06470204  | 0.078078994 | -0.828674099 | 0.407288846 | 0.575687907 |
| ENSG00000168710 | 900.4434863 | -0.031023967 | 0.073452891 | -0.422365498 | 0.672758257 | 0.791410706 |
| ENSG00000168724 | 488.8807918 | 0.105853554  | 0.095218483 | 1.111691245  | 0.266270925 | 0.433106495 |
| ENSG00000168734 | 103.1647262 | -0.815859572 | 0.179110808 | -4.555054938 | 5.24E-06    | 4.00E-05    |
| ENSG00000168743 | 11.76707423 | -2.850465671 | 0.657997428 | -4.332031629 | 1.48E-05    | 0.00010203  |
| ENSG00000168758 | 357.8578347 | 0.139917174  | 0.110590101 | 1.265187141  | 0.205804251 | 0.359373328 |
| ENSG00000168763 | 205.4650241 | -0.020571732 | 0.129061631 | -0.159394641 | 0.873357961 | 0.929849389 |
| ENSG00000168765 | 232.0142908 | -0.030983107 | 0.12249254  | -0.25293873  | 0.80031556  | 0.880924836 |
| ENSG00000168769 | 1809.254664 | -0.067113998 | 0.069462886 | -0.966184991 | 0.333951622 | 0.505990311 |
| ENSG00000168772 | 2311.549137 | -0.437243582 | 0.063362529 | -6.900664951 | 5.18E-12    | 9.44E-11    |
| ENSG00000168778 | 53.10295806 | -0.29797284  | 0.247088847 | -1.205933995 | 0.227842942 | 0.386581689 |
| ENSG00000168779 | 4824.88483  | 0.887623877  | 0.064679435 | 13.7234328   | 7.35E-43    | 6.26E-41    |
| ENSG00000168781 | 81.04308958 | -0.20539341  | 0.210676293 | -0.974924173 | 0.329597875 | 0.502149212 |

|                 |             |              |             |              |             |             |
|-----------------|-------------|--------------|-------------|--------------|-------------|-------------|
| ENSG00000168785 | 19.36980629 | 1.238755455  | 0.401801743 | 3.083001698  | 0.00204924  | 0.008334628 |
| ENSG00000168792 | 134.5229143 | -0.150779552 | 0.164984107 | -0.913903491 | 0.360767559 | 0.532042195 |
| ENSG00000168795 | 171.4812809 | -0.435649821 | 0.153675939 | -2.834860319 | 0.004584573 | 0.016640695 |
| ENSG00000168802 | 15.91883977 | 0.216062858  | 0.42815585  | 0.504636006  | 0.613814516 | 0.748716754 |
| ENSG00000168807 | 299.8032439 | 0.033302998  | 0.114964061 | 0.289681812  | 0.772059672 | 0.86337203  |
| ENSG00000168811 | 12.09408928 | 0.414600514  | 0.538778438 | 0.769519501  | 0.441584973 | 0.606704236 |
| ENSG00000168813 | 437.5023837 | -0.20480007  | 0.101264663 | -2.022423844 | 0.043132584 | 0.108756669 |
| ENSG00000168818 | 319.6261374 | -0.6894714   | 0.114444155 | -6.024522605 | 1.70E-09    | 2.30E-08    |
| ENSG00000168826 | 37.2453504  | 0.502066019  | 0.286686925 | 1.751269328  | 0.079899528 | 0.176331292 |
| ENSG00000168827 | 434.7622777 | -0.023038295 | 0.095194599 | -0.242012632 | 0.808770375 | 0.887007922 |
| ENSG00000168843 | 8.255013966 | -3.044130359 | 0.814310479 | -3.738292014 | 0.000185275 | 0.000999476 |
| ENSG00000168872 | 350.3341684 | 0.055593923  | 0.102003594 | 0.545019259  | 0.585740272 | 0.72755271  |
| ENSG00000168876 | 59.90929191 | 0.161549131  | 0.225516864 | 0.716350555  | 0.473774918 | 0.634909013 |
| ENSG00000168883 | 433.0987275 | 0.136017906  | 0.10211418  | 1.332017812  | 0.182854336 | 0.329996851 |
| ENSG00000168884 | 301.9372153 | 0.486407363  | 0.110851772 | 4.387907888  | 1.14E-05    | 8.10E-05    |
| ENSG00000168887 | 175.8867919 | -0.161250192 | 0.144538964 | -1.11561746  | 0.264585915 | 0.431314651 |
| ENSG00000168890 | 108.9391558 | 0.175565087  | 0.176996592 | 0.991912248  | 0.321240334 | 0.492989334 |
| ENSG00000168894 | 408.8011041 | 0.309332019  | 0.108621389 | 2.847800267  | 0.004402254 | 0.016074465 |
| ENSG00000168904 | 83.18449151 | -0.343896472 | 0.196481053 | -1.750278036 | 0.080070349 | 0.176597298 |
| ENSG00000168906 | 971.030699  | -0.07307441  | 0.072889259 | -1.002540167 | 0.316082777 | 0.487699338 |
| ENSG00000168916 | 317.2258067 | -2.135223421 | 0.124944696 | -17.0893483  | 1.78E-65    | 2.66E-63    |
| ENSG00000168917 | 76.40870439 | -0.156403778 | 0.204113082 | -0.76626043  | 0.443521358 | 0.608412551 |
| ENSG00000168918 | 14.31593969 | -2.025350133 | 0.531493042 | -3.81068043  | 0.000138585 | 0.000772807 |
| ENSG00000168924 | 956.2389934 | 0.140505496  | 0.072717035 | 1.932222575  | 0.05333204  | 0.128202439 |
| ENSG00000168936 | 188.4971623 | 0.262492098  | 0.144207336 | 1.820240946  | 0.06872232  | 0.15676233  |
| ENSG00000168938 | 108.3421343 | 0.262540931  | 0.173803292 | 1.510563626  | 0.130899667 | 0.257997422 |
| ENSG00000168939 | 16.26113901 | -0.409455435 | 0.435436798 | -0.940332642 | 0.347046961 | 0.518998461 |
| ENSG00000168944 | 333.1530498 | -0.279976175 | 0.115707244 | -2.41969444  | 0.015533554 | 0.046914605 |
| ENSG00000168958 | 356.344529  | 0.113516411  | 0.104327449 | 1.088078087  | 0.276560637 | 0.445050666 |
| ENSG00000168970 | 8.322821698 | -0.141920488 | 0.605938222 | -0.234216101 | 0.814817215 | 0.891273744 |
| ENSG00000168994 | 19.05625052 | -0.463870638 | 0.401574052 | -1.155131006 | 0.248036783 | 0.412279338 |
| ENSG00000169016 | 142.9758642 | 0.194924105  | 0.154640847 | 1.260495585  | 0.207490639 | 0.361480964 |
| ENSG00000169018 | 456.4296919 | -0.13140432  | 0.098221213 | -1.337840538 | 0.180948424 | 0.327507088 |
| ENSG00000169019 | 30.53642851 | 0.170465337  | 0.318792627 | 0.534721704  | 0.592842311 | 0.733089931 |
| ENSG00000169020 | 1089.059939 | 0.351432401  | 0.077644633 | 4.526164761  | 6.01E-06    | 4.53E-05    |
| ENSG00000169021 | 185.7745115 | -0.020388701 | 0.141765105 | -0.14382031  | 0.885642365 | 0.937428852 |
| ENSG00000169032 | 247.4925062 | -0.057481834 | 0.120308227 | -0.477788058 | 0.632801061 | 0.762346184 |
| ENSG00000169045 | 6872.967359 | -0.029153823 | 0.058105825 | -0.501736663 | 0.615852771 | 0.750358564 |
| ENSG00000169047 | 90.00219568 | -1.262695136 | 0.204516783 | -6.174041642 | 6.66E-10    | 9.51E-09    |
| ENSG00000169057 | 424.5422428 | -0.114363987 | 0.097776759 | -1.169643868 | 0.242144316 | 0.404832326 |
| ENSG00000169062 | 301.1338042 | 0.163375684  | 0.108649312 | 1.503697366  | 0.132659308 | 0.260806899 |
| ENSG00000169071 | 61.98831744 | -0.214454189 | 0.245948692 | -0.871946858 | 0.383237369 | 0.552575821 |
| ENSG00000169084 | 81.37009021 | 0.254835506  | 0.197915467 | 1.287597734  | 0.197886029 | 0.349415723 |
| ENSG00000169087 | 64.37689249 | 0.125062232  | 0.219963421 | 0.568559225  | 0.569655303 | 0.714810407 |
| ENSG00000169093 | 309.0084947 | 0.234541623  | 0.110383125 | 2.124796003  | 0.033603638 | 0.088362095 |
| ENSG00000169100 | 7274.639309 | 0.021802825  | 0.057845447 | 0.376915143  | 0.706236668 | 0.815661201 |
| ENSG00000169105 | 110.2937554 | -0.19119582  | 0.172425219 | -1.108862271 | 0.267489602 | 0.43438456  |
| ENSG00000169118 | 293.9255657 | -0.032671895 | 0.114003694 | -0.286586284 | 0.774429118 | 0.864944408 |
| ENSG00000169131 | 70.91034747 | 0.020996862  | 0.208588582 | 0.100661607  | 0.91981909  | 0.956026545 |
| ENSG00000169136 | 380.0879958 | 0.182394311  | 0.100679787 | 1.811627902  | 0.070043711 | 0.159104787 |

|                 |             |              |             |              |             |             |
|-----------------|-------------|--------------|-------------|--------------|-------------|-------------|
| ENSG00000169139 | 435.0099271 | -0.142931408 | 0.096151075 | -1.486529484 | 0.137139124 | 0.266850433 |
| ENSG00000169155 | 197.1976084 | -0.303093267 | 0.143515348 | -2.111922324 | 0.034693112 | 0.090768141 |
| ENSG00000169169 | 689.4300131 | 0.135085036  | 0.081322085 | 1.661111326  | 0.09669109  | 0.204212862 |
| ENSG00000169180 | 1385.007613 | 0.370749936  | 0.068901531 | 5.380866472  | 7.41E-08    | 7.93E-07    |
| ENSG00000169188 | 161.6726739 | -0.021029555 | 0.147202872 | -0.142861034 | 0.886399933 | 0.938018673 |
| ENSG00000169189 | 155.3450224 | 0.295386971  | 0.150374137 | 1.964346906  | 0.049489876 | 0.120901614 |
| ENSG00000169193 | 20.74766001 | -0.311408954 | 0.40582359  | -0.767350546 | 0.442873123 | 0.607820104 |
| ENSG00000169213 | 79.2492331  | 0.350583173  | 0.2060859   | 1.7011507    | 0.088914693 | 0.191532692 |
| ENSG00000169217 | 301.2381375 | -0.012218511 | 0.111154714 | -0.109923458 | 0.912470078 | 0.953030514 |
| ENSG00000169220 | 425.7006254 | 0.481703755  | 0.0957901   | 5.028742571  | 4.94E-07    | 4.66E-06    |
| ENSG00000169221 | 324.1070503 | 0.156939916  | 0.11942812  | 1.314095172  | 0.188814179 | 0.337783083 |
| ENSG00000169223 | 1251.15911  | 0.297422883  | 0.077338888 | 3.845709315  | 0.000120204 | 0.000680576 |
| ENSG00000169228 | 35.17089085 | 0.58056886   | 0.304258916 | 1.908140824  | 0.056373017 | 0.133965789 |
| ENSG00000169230 | 683.4636157 | 0.410678631  | 0.092561212 | 4.436832891  | 9.13E-06    | 6.60E-05    |
| ENSG00000169231 | 528.3167027 | 0.341242882  | 0.092496066 | 3.689269129  | 0.000224899 | 0.001188101 |
| ENSG00000169239 | 22.54168521 | -0.02746835  | 0.387602247 | -0.070867364 | 0.943503317 | 0.968637121 |
| ENSG00000169241 | 281.9430496 | -0.113264149 | 0.122194522 | -0.926916745 | 0.353969762 | 0.525381789 |
| ENSG00000169242 | 12.36693085 | -1.458726262 | 0.529700699 | -2.753868863 | 0.005889536 | 0.020553444 |
| ENSG00000169246 | 25.21808406 | 0.958577286  | 0.381260936 | 2.514228956  | 0.011929296 | 0.037462737 |
| ENSG00000169248 | 24.0992232  | -2.38866343  | 0.433791921 | -5.506472836 | 3.66E-08    | 4.15E-07    |
| ENSG00000169249 | 146.7786215 | 0.477320441  | 0.152232098 | 3.135478308  | 0.001715741 | 0.007177194 |
| ENSG00000169251 | 321.0189569 | 0.386009947  | 0.107157323 | 3.602273153  | 0.000315447 | 0.001607304 |
| ENSG00000169258 | 54.85315983 | 0.09465102   | 0.236709107 | 0.399862182  | 0.689258028 | 0.804480669 |
| ENSG00000169288 | 133.2719543 | -0.135016856 | 0.160162866 | -0.842997256 | 0.399229979 | 0.56732256  |
| ENSG00000169299 | 328.7313408 | 0.35109954   | 0.113524938 | 3.092708487  | 0.001983389 | 0.008117908 |
| ENSG00000169330 | 16.64322051 | -0.013923611 | 0.423505344 | -0.032877061 | 0.973772626 | 0.986408007 |
| ENSG00000169359 | 45.68948866 | -0.191223566 | 0.261672824 | -0.730773504 | 0.46491751  | 0.627529189 |
| ENSG00000169371 | 97.12536904 | 0.164894041  | 0.184421838 | 0.894113424  | 0.371261207 | 0.54217406  |
| ENSG00000169372 | 25.77419834 | -0.124048407 | 0.357932956 | -0.346568834 | 0.728915263 | 0.83264802  |
| ENSG00000169375 | 1079.633377 | -0.352742308 | 0.074459027 | -4.737401522 | 2.16E-06    | 1.79E-05    |
| ENSG00000169379 | 324.0516241 | -1.111611206 | 0.116615978 | -9.532237587 | 1.54E-21    | 5.63E-20    |
| ENSG00000169398 | 1417.748936 | -0.103112901 | 0.074196689 | -1.38972374  | 0.164612783 | 0.305659717 |
| ENSG00000169410 | 277.7087996 | 0.069800969  | 0.129683288 | 0.538241817  | 0.590410114 | 0.731606463 |
| ENSG00000169418 | 29.01098007 | 2.475100975  | 0.386087417 | 6.410726859  | 1.45E-10    | 2.24E-09    |
| ENSG00000169432 | 46.84828443 | -3.717668244 | 0.398724407 | -9.323904377 | 1.12E-20    | 3.95E-19    |
| ENSG00000169439 | 41.50784736 | -1.5351922   | 0.298122934 | -5.149527349 | 2.61E-07    | 2.58E-06    |
| ENSG00000169446 | 144.180825  | -0.226927201 | 0.155119575 | -1.462917882 | 0.14348985  | 0.275859083 |
| ENSG00000169490 | 89.75314311 | -0.607582044 | 0.192610202 | -3.154464494 | 0.001607929 | 0.006784053 |
| ENSG00000169499 | 66.40638716 | 0.268386694  | 0.228290014 | 1.175639218  | 0.239739077 | 0.401879815 |
| ENSG00000169504 | 790.9903744 | -0.331542621 | 0.078712916 | -4.212048523 | 2.53E-05    | 0.000166736 |
| ENSG00000169515 | 886.3026859 | -0.468598597 | 0.085911239 | -5.454450451 | 4.91E-08    | 5.44E-07    |
| ENSG00000169519 | 101.7565523 | -0.207313491 | 0.183983976 | -1.126801883 | 0.259826254 | 0.425974404 |
| ENSG00000169548 | 11.97306042 | -0.316389681 | 0.494156252 | -0.640262427 | 0.522002003 | 0.676061418 |
| ENSG00000169550 | 96.80545425 | -0.187809183 | 0.184060037 | -1.020369151 | 0.307553419 | 0.478639804 |
| ENSG00000169554 | 977.8621991 | 0.19664243   | 0.071589805 | 2.746793748  | 0.006018097 | 0.020893773 |
| ENSG00000169564 | 2133.014798 | 0.307687419  | 0.065344302 | 4.708710798  | 2.49E-06    | 2.04E-05    |
| ENSG00000169567 | 1089.577805 | 0.368830887  | 0.074312493 | 4.963242022  | 6.93E-07    | 6.36E-06    |
| ENSG00000169570 | 37.22201255 | 0.133911395  | 0.287340578 | 0.46603719   | 0.641188881 | 0.768299941 |
| ENSG00000169592 | 365.3101952 | 0.447296425  | 0.108410654 | 4.125945265  | 3.69E-05    | 0.000234042 |
| ENSG00000169598 | 60.66185074 | 0.623755784  | 0.229490733 | 2.717999881  | 0.006567786 | 0.022529351 |

|                 |             |              |             |              |             |             |
|-----------------|-------------|--------------|-------------|--------------|-------------|-------------|
| ENSG00000169599 | 130.4543298 | 0.325897582  | 0.161747559 | 2.01485317   | 0.043920036 | 0.110304062 |
| ENSG00000169604 | 985.4056473 | -0.275284249 | 0.073784792 | -3.730907697 | 0.000190791 | 0.001025015 |
| ENSG00000169607 | 225.0186941 | -0.29837711  | 0.126524195 | -2.358261284 | 0.018360765 | 0.053864066 |
| ENSG00000169609 | 84.29201015 | 0.016962343  | 0.193713463 | 0.087564088  | 0.930223146 | 0.962133707 |
| ENSG00000169612 | 71.09252861 | 0.005603301  | 0.207877328 | 0.026954844  | 0.97849575  | 0.988843871 |
| ENSG00000169621 | 13.88988097 | -1.28414612  | 0.48905699  | -2.625759669 | 0.008645584 | 0.028561739 |
| ENSG00000169635 | 212.621299  | -0.506149677 | 0.126777074 | -3.99243853  | 6.54E-05    | 0.000392412 |
| ENSG00000169641 | 504.0395266 | -0.326307738 | 0.090798392 | -3.593761182 | 0.000325939 | 0.001654068 |
| ENSG00000169660 | 114.9415603 | -0.675091064 | 0.175612929 | -3.844199092 | 0.000120947 | 0.000683953 |
| ENSG00000169679 | 606.56372   | -0.142818109 | 0.091108849 | -1.567554747 | 0.11698508  | 0.236853476 |
| ENSG00000169683 | 194.4246141 | -0.059224739 | 0.137094648 | -0.431998913 | 0.665742203 | 0.786165328 |
| ENSG00000169684 | 121.7897937 | 0.452372425  | 0.16208559  | 2.790947821  | 0.005255394 | 0.018675063 |
| ENSG00000169689 | 591.2930863 | 0.30595088   | 0.086877816 | 3.521622581  | 0.000428914 | 0.002113279 |
| ENSG00000169692 | 141.0079985 | 0.284598032  | 0.17433089  | 1.632516371  | 0.102570753 | 0.213928933 |
| ENSG00000169696 | 230.1588523 | 0.443826927  | 0.135967014 | 3.264225004  | 0.00109764  | 0.00488083  |
| ENSG00000169710 | 19351.38174 | 0.015435112  | 0.066128001 | 0.233412658  | 0.815440985 | 0.891608898 |
| ENSG00000169714 | 1840.02046  | -0.074075327 | 0.064047018 | -1.156577302 | 0.2474451   | 0.411685577 |
| ENSG00000169718 | 569.9596269 | 0.128612795  | 0.088409846 | 1.454733844  | 0.145742959 | 0.279069159 |
| ENSG00000169727 | 796.2350966 | 0.345744071  | 0.07654778  | 4.516709349  | 6.28E-06    | 4.71E-05    |
| ENSG00000169733 | 140.2614285 | 0.571871212  | 0.166704518 | 3.430448199  | 0.000602585 | 0.002862534 |
| ENSG00000169738 | 275.2627601 | 0.058258813  | 0.120275204 | 0.484379248  | 0.628116743 | 0.758785336 |
| ENSG00000169740 | 36.48582035 | -0.457874931 | 0.294783421 | -1.553258762 | 0.120361328 | 0.242431681 |
| ENSG00000169750 | 311.8272147 | -0.021249478 | 0.108343906 | -0.196129882 | 0.844508508 | 0.909934111 |
| ENSG00000169756 | 256.540841  | -0.009812103 | 0.120076906 | -0.081715156 | 0.934873226 | 0.964624614 |
| ENSG00000169758 | 13.50954857 | -0.146849039 | 0.479942809 | -0.305971955 | 0.759625999 | 0.855073837 |
| ENSG00000169760 | 199.0515031 | -2.677487429 | 0.16615239  | -16.1146489  | 2.01E-58    | 2.57E-56    |
| ENSG00000169762 | 82.49675095 | -0.169287072 | 0.193949343 | -0.872841691 | 0.382749372 | 0.552299228 |
| ENSG00000169764 | 228.0303822 | -0.211648666 | 0.131453897 | -1.610060032 | 0.107384751 | 0.221861098 |
| ENSG00000169783 | 55.90054034 | -1.547394346 | 0.270077709 | -5.729441175 | 1.01E-08    | 1.24E-07    |
| ENSG00000169813 | 2401.045025 | -0.188279765 | 0.057501828 | -3.274326584 | 0.001059141 | 0.004730606 |
| ENSG00000169814 | 167.0422994 | 0.073848966  | 0.146569908 | 0.503848075  | 0.614368142 | 0.749042347 |
| ENSG00000169826 | 193.3151877 | -0.103969279 | 0.133290558 | -0.780019838 | 0.435379199 | 0.601607562 |
| ENSG00000169851 | 912.5669723 | -2.073682811 | 0.080864442 | -25.6439388  | 4.94E-145   | 2.48E-142   |
| ENSG00000169855 | 878.5547552 | -0.051792298 | 0.076768938 | -0.674651742 | 0.499897052 | 0.658050219 |
| ENSG00000169857 | 90.60948785 | 0.199163474  | 0.185491535 | 1.073706542  | 0.282954228 | 0.452333908 |
| ENSG00000169871 | 303.3470004 | -0.080511326 | 0.127521728 | -0.631353787 | 0.527809225 | 0.680568444 |
| ENSG00000169884 | 37.51906191 | 0.811632174  | 0.284222558 | 2.855621951  | 0.004295262 | 0.015741078 |
| ENSG00000169894 | 22.26270729 | -3.887481929 | 0.59460963  | -6.537872464 | 6.24E-11    | 1.02E-09    |
| ENSG00000169895 | 693.5623877 | 0.208712451  | 0.082731357 | 2.522773191  | 0.011643347 | 0.03671248  |
| ENSG00000169902 | 64.25833061 | -0.057835459 | 0.216084876 | -0.267651581 | 0.788967523 | 0.873955272 |
| ENSG00000169905 | 1045.748501 | 0.237404528  | 0.071687703 | 3.311649252  | 0.000927478 | 0.004206741 |
| ENSG00000169908 | 22.61501806 | -1.29345978  | 0.383758554 | -3.370504106 | 0.000750308 | 0.003474967 |
| ENSG00000169914 | 281.8986941 | -0.156235413 | 0.117055163 | -1.334716112 | 0.181969278 | 0.32876173  |
| ENSG00000169919 | 323.8462109 | 0.111657785  | 0.105957558 | 1.053797262  | 0.291975747 | 0.462535239 |
| ENSG00000169925 | 478.9993961 | -0.415237777 | 0.092497705 | -4.489168435 | 7.15E-06    | 5.29E-05    |
| ENSG00000169926 | 376.2677523 | 0.310333784  | 0.102679091 | 3.022365909  | 0.002508072 | 0.009918605 |
| ENSG00000169951 | 65.93914193 | 0.314248663  | 0.222623623 | 1.411569263  | 0.158076828 | 0.296319858 |
| ENSG00000169957 | 363.0961321 | -0.222992758 | 0.107541317 | -2.073554284 | 0.038120725 | 0.097974443 |
| ENSG00000169964 | 26.01564799 | -0.748142723 | 0.371325806 | -2.014787848 | 0.043926883 | 0.110304062 |
| ENSG00000169967 | 671.2736278 | 0.046028616  | 0.081700799 | 0.563380237  | 0.573175991 | 0.717878752 |

|                 |             |              |             |              |             |             |
|-----------------|-------------|--------------|-------------|--------------|-------------|-------------|
| ENSG00000169972 | 56.20946374 | 0.023328361  | 0.240506658 | 0.096996735  | 0.922728987 | 0.957350918 |
| ENSG00000169976 | 289.2891878 | 0.322747693  | 0.129058496 | 2.500786098  | 0.0123918   | 0.038707496 |
| ENSG00000169981 | 152.2798669 | 0.018196846  | 0.146782255 | 0.123971701  | 0.901337682 | 0.946765155 |
| ENSG00000169991 | 139.6673945 | -0.321443893 | 0.153984863 | -2.087503184 | 0.036842674 | 0.095344332 |
| ENSG00000169992 | 754.4418721 | -0.111408533 | 0.088518103 | -1.258596031 | 0.208176281 | 0.362540568 |
| ENSG00000170004 | 2755.863504 | 0.259794722  | 0.061748588 | 4.207298187  | 2.58E-05    | 0.000169721 |
| ENSG00000170017 | 1109.201781 | 2.296169997  | 0.083159343 | 27.61169008  | 8.05E-168   | 4.92E-165   |
| ENSG00000170027 | 2544.443709 | -0.063968486 | 0.064444831 | -0.992608482 | 0.32090079  | 0.492590252 |
| ENSG00000170035 | 117.1822419 | 0.588963312  | 0.171164021 | 3.440929403  | 0.00057972  | 0.002764197 |
| ENSG00000170037 | 216.4656032 | 0.125779748  | 0.12859711  | 0.978091565  | 0.328029039 | 0.500415282 |
| ENSG00000170043 | 310.9253196 | -0.061221671 | 0.124457157 | -0.491909607 | 0.622783246 | 0.755134766 |
| ENSG00000170044 | 7.821755511 | -4.345596611 | 1.108661752 | -3.919677578 | 8.87E-05    | 0.000516596 |
| ENSG00000170049 | 55.25677564 | 0.466957545  | 0.2408221   | 1.939014503  | 0.052499572 | 0.126733372 |
| ENSG00000170085 | 302.2493615 | -0.335878256 | 0.115971625 | -2.896210655 | 0.003776988 | 0.014069304 |
| ENSG00000170088 | 254.6663633 | 0.038425523  | 0.12849249  | 0.299048784  | 0.764902823 | 0.858399773 |
| ENSG00000170100 | 149.709989  | -0.93369507  | 0.156623683 | -5.961391365 | 2.50E-09    | 3.31E-08    |
| ENSG00000170113 | 426.0532897 | -0.142955039 | 0.097634882 | -1.464179984 | 0.143144778 | 0.275370404 |
| ENSG00000170142 | 609.448861  | 0.445058438  | 0.088820077 | 5.010786435  | 5.42E-07    | 5.10E-06    |
| ENSG00000170144 | 1210.711327 | -0.022699089 | 0.079062946 | -0.28710149  | 0.774034612 | 0.864738597 |
| ENSG00000170145 | 346.3661908 | -0.390332913 | 0.107720942 | -3.623556445 | 0.00029058  | 0.0014968   |
| ENSG00000170153 | 37.68223267 | -0.240170172 | 0.294801005 | -0.814685729 | 0.415252224 | 0.583209876 |
| ENSG00000170160 | 6.653108198 | -1.918230992 | 0.748880716 | -2.561463997 | 0.010423204 | 0.033420395 |
| ENSG00000170161 | 10.92082498 | 0.03963585   | 0.513126241 | 0.077243857  | 0.938429553 | 0.966102042 |
| ENSG00000170175 | 29.28397938 | -0.599245873 | 0.347655257 | -1.723678442 | 0.084765909 | 0.184720248 |
| ENSG00000170185 | 157.8226449 | -0.185658736 | 0.144695678 | -1.283098002 | 0.199457744 | 0.351452951 |
| ENSG00000170190 | 118.5523604 | -0.330051195 | 0.168195314 | -1.962309093 | 0.049726509 | 0.121331992 |
| ENSG00000170191 | 149.4392161 | 0.269572763  | 0.156895919 | 1.718163005  | 0.085766887 | 0.186323456 |
| ENSG00000170222 | 33.28436294 | 0.04857102   | 0.307097307 | 0.158161661  | 0.874329414 | 0.930361736 |
| ENSG00000170234 | 155.3231176 | -0.164905091 | 0.145826433 | -1.130831271 | 0.258126115 | 0.423744186 |
| ENSG00000170242 | 690.9470575 | -0.151066239 | 0.081459546 | -1.854493982 | 0.06366852  | 0.147607147 |
| ENSG00000170248 | 1600.958141 | 0.096113712  | 0.064186125 | 1.497421942  | 0.134283503 | 0.262904084 |
| ENSG00000170260 | 78.66080841 | 0.483453996  | 0.199785667 | 2.41986326   | 0.015526344 | 0.046913005 |
| ENSG00000170264 | 132.5662058 | -0.141753674 | 0.161242712 | -0.879132283 | 0.379329555 | 0.548871267 |
| ENSG00000170265 | 459.8500131 | 0.518673176  | 0.094390297 | 5.494984047  | 3.91E-08    | 4.41E-07    |
| ENSG00000170266 | 935.0424477 | 0.472203876  | 0.089240679 | 5.291352361  | 1.21E-07    | 1.26E-06    |
| ENSG00000170270 | 27.27921413 | -0.272966423 | 0.346030866 | -0.788849925 | 0.430199726 | 0.59695896  |
| ENSG00000170271 | 402.4322519 | -0.047875746 | 0.107587626 | -0.444993051 | 0.656324776 | 0.77965278  |
| ENSG00000170275 | 2200.243409 | 0.24446094   | 0.05929067  | 4.123092863  | 3.74E-05    | 0.00023664  |
| ENSG00000170291 | 164.44302   | 0.130945832  | 0.148566059 | 0.881398034  | 0.378102422 | 0.547434005 |
| ENSG00000170293 | 181.5018305 | 0.111826382  | 0.135156196 | 0.827386282  | 0.408018154 | 0.576486723 |
| ENSG00000170296 | 112.8086354 | -0.046670639 | 0.177692359 | -0.262648542 | 0.792821482 | 0.876423602 |
| ENSG00000170310 | 136.6595151 | 0.122927395  | 0.154802327 | 0.794092685  | 0.427141476 | 0.594372497 |
| ENSG00000170312 | 365.5059553 | -0.28124657  | 0.112115382 | -2.508545791 | 0.012122925 | 0.037977416 |
| ENSG00000170315 | 2822.524506 | 0.487297158  | 0.072854146 | 6.688667454  | 2.25E-11    | 3.82E-10    |
| ENSG00000170322 | 193.8078401 | -0.294834362 | 0.132075306 | -2.23232012  | 0.025593813 | 0.070715242 |
| ENSG00000170325 | 150.8307637 | 0.419349556  | 0.148146298 | 2.830644863  | 0.004645427 | 0.016830556 |
| ENSG00000170340 | 82.32807825 | -0.190416363 | 0.197118413 | -0.96599988  | 0.334044241 | 0.505990311 |
| ENSG00000170345 | 1058.449492 | 1.025047341  | 0.091698463 | 11.17845711  | 5.20E-29    | 2.68E-27    |
| ENSG00000170348 | 807.7532834 | 0.11045898   | 0.077719699 | 1.421248181  | 0.155244622 | 0.292709201 |
| ENSG00000170364 | 17.4951369  | -0.287654988 | 0.424774143 | -0.677195146 | 0.498282147 | 0.65629342  |

|                 |             |              |             |              |             |             |
|-----------------|-------------|--------------|-------------|--------------|-------------|-------------|
| ENSG00000170365 | 153.4112301 | -0.241952792 | 0.148721298 | -1.626887305 | 0.103761035 | 0.215867235 |
| ENSG00000170382 | 26.37592088 | -1.632255152 | 0.38577631  | -4.231092243 | 2.33E-05    | 0.00015402  |
| ENSG00000170385 | 235.1991217 | 0.02377328   | 0.136806735 | 0.17377273   | 0.862044077 | 0.921617562 |
| ENSG00000170390 | 72.3040406  | 0.33229888   | 0.213946664 | 1.55318561   | 0.120378798 | 0.242431681 |
| ENSG00000170396 | 1060.236484 | 4.802047513  | 0.11477707  | 41.83803876  | 0           | 0           |
| ENSG00000170412 | 8.560567378 | -1.880659174 | 0.672941924 | -2.794682732 | 0.005195067 | 0.018494733 |
| ENSG00000170417 | 31.91364419 | -0.141948442 | 0.3071954   | -0.462078669 | 0.644024907 | 0.770422279 |
| ENSG00000170421 | 56.03097593 | 1.137433924  | 0.244789879 | 4.646572513  | 3.37E-06    | 2.69E-05    |
| ENSG00000170425 | 99.28807041 | 0.434781452  | 0.181879869 | 2.390486937  | 0.016826048 | 0.050149691 |
| ENSG00000170430 | 145.9440859 | 0.442254279  | 0.151396194 | 2.921171714  | 0.003487176 | 0.013160762 |
| ENSG00000170439 | 120.0415392 | 0.453332869  | 0.167763308 | 2.702217042  | 0.006887878 | 0.0234669   |
| ENSG00000170445 | 672.5319789 | 0.140394304  | 0.088938414 | 1.578556418  | 0.114437838 | 0.23283724  |
| ENSG00000170448 | 215.1582801 | 0.284849191  | 0.130564895 | 2.181667516  | 0.02913408  | 0.078625633 |
| ENSG00000170456 | 272.0946525 | -0.088783348 | 0.113332409 | -0.783388872 | 0.433398789 | 0.599680141 |
| ENSG00000170464 | 39.00554462 | -0.097749003 | 0.28044017  | -0.348555639 | 0.727422936 | 0.831595187 |
| ENSG00000170468 | 39.93989646 | -0.594087777 | 0.293624892 | -2.023288192 | 0.043043444 | 0.108551392 |
| ENSG00000170469 | 21.81971222 | -0.10558792  | 0.384977584 | -0.274270306 | 0.783876903 | 0.871011269 |
| ENSG00000170471 | 540.5660672 | -0.163432045 | 0.08778101  | -1.861815487 | 0.062629103 | 0.145777036 |
| ENSG00000170473 | 149.3222348 | -0.132106042 | 0.153038589 | -0.86322047  | 0.388016261 | 0.556567387 |
| ENSG00000170485 | 63.80511065 | -1.306064791 | 0.23684739  | -5.514372747 | 3.50E-08    | 3.98E-07    |
| ENSG00000170500 | 62.85080354 | 0.522320727  | 0.232495363 | 2.246585563  | 0.024666526 | 0.068517043 |
| ENSG00000170502 | 225.6119214 | 0.198144262  | 0.130642478 | 1.516690936  | 0.129344734 | 0.255722094 |
| ENSG00000170515 | 1568.044276 | 0.155507569  | 0.072868383 | 2.13408839   | 0.032835546 | 0.086666839 |
| ENSG00000170522 | 977.1481946 | -0.204883342 | 0.074222207 | -2.760404865 | 0.005772977 | 0.02017239  |
| ENSG00000170525 | 354.0676259 | 0.265584635  | 0.103273005 | 2.571675291  | 0.010120777 | 0.032614487 |
| ENSG00000170537 | 25.78166751 | 0.125053766  | 0.342572241 | 0.365043488  | 0.715078944 | 0.822477747 |
| ENSG00000170540 | 211.5799274 | -0.230080653 | 0.132218483 | -1.740154994 | 0.081831806 | 0.179784224 |
| ENSG00000170542 | 134.0458746 | 0.127682797  | 0.158067275 | 0.807775025  | 0.419220105 | 0.587000081 |
| ENSG00000170545 | 16.20530525 | -1.430882693 | 0.465291227 | -3.075241077 | 0.002103325 | 0.008514292 |
| ENSG00000170558 | 75.58720737 | 0.625629537  | 0.206861237 | 3.024392321  | 0.002491331 | 0.009857953 |
| ENSG00000170571 | 448.7314896 | 0.109325204  | 0.101216624 | 1.080111147  | 0.280092689 | 0.448934504 |
| ENSG00000170577 | 329.9959403 | 0.026913791  | 0.133365719 | 0.201804415  | 0.84006963  | 0.906960118 |
| ENSG00000170581 | 164.1711944 | -0.147799919 | 0.140811878 | -1.049626786 | 0.293889737 | 0.464320002 |
| ENSG00000170584 | 220.0809756 | -0.255320066 | 0.126174096 | -2.023553758 | 0.043016087 | 0.108519846 |
| ENSG00000170604 | 267.4783735 | 0.132809698  | 0.12580784  | 1.055655186  | 0.291125778 | 0.461562506 |
| ENSG00000170606 | 1913.982106 | 0.190115331  | 0.067401494 | 2.820639693  | 0.0047928   | 0.017269459 |
| ENSG00000170608 | 11.92172568 | -3.078275253 | 0.682662806 | -4.509217768 | 6.51E-06    | 4.85E-05    |
| ENSG00000170619 | 129.2467343 | 0.282650587  | 0.162397224 | 1.740489036  | 0.081773184 | 0.179760236 |
| ENSG00000170631 | 73.61813881 | 0.189682014  | 0.207898512 | 0.912377929  | 0.361569804 | 0.532498536 |
| ENSG00000170632 | 74.71245401 | 0.152889165  | 0.206304369 | 0.741085448  | 0.458641632 | 0.622312879 |
| ENSG00000170633 | 198.5338572 | -0.186700549 | 0.144107608 | -1.295563445 | 0.19512593  | 0.346334948 |
| ENSG00000170634 | 68.94417238 | -0.278002888 | 0.214991666 | -1.293086815 | 0.195981035 | 0.347103126 |
| ENSG00000170638 | 402.7376781 | 0.222601965  | 0.113966511 | 1.953222605  | 0.050793224 | 0.123313587 |
| ENSG00000170653 | 386.4347341 | 0.079225741  | 0.101167664 | 0.783113282  | 0.433560592 | 0.599785862 |
| ENSG00000170677 | 174.0555555 | -0.118731417 | 0.141000254 | -0.842065268 | 0.399751421 | 0.567948641 |
| ENSG00000170684 | 54.535247   | -0.205749478 | 0.234887042 | -0.875950742 | 0.381056813 | 0.550538001 |
| ENSG00000170689 | 413.6938799 | -1.151317666 | 0.106860548 | -10.77401981 | 4.57E-27    | 2.20E-25    |
| ENSG00000170703 | 12.22297075 | -2.595475678 | 0.984617238 | -2.636025024 | 0.008388355 | 0.02787585  |
| ENSG00000170734 | 304.6479767 | 0.223515998  | 0.125357965 | 1.783021908  | 0.074582737 | 0.166666196 |
| ENSG00000170759 | 2162.648005 | -0.088115879 | 0.064124139 | -1.374145208 | 0.169396607 | 0.311985595 |

|                 |             |              |             |              |             |             |
|-----------------|-------------|--------------|-------------|--------------|-------------|-------------|
| ENSG00000170776 | 865.3963568 | -0.140441012 | 0.077635686 | -1.808974965 | 0.070454893 | 0.159832022 |
| ENSG00000170779 | 326.9514946 | -0.168487305 | 0.110322274 | -1.527228347 | 0.12670424  | 0.251884299 |
| ENSG00000170791 | 104.4298166 | -0.065569051 | 0.176406393 | -0.371693165 | 0.710121315 | 0.818499776 |
| ENSG00000170802 | 381.584901  | 0.134585094  | 0.099021778 | 1.35914641   | 0.174100199 | 0.318352707 |
| ENSG00000170832 | 995.9575931 | 0.090497991  | 0.075194148 | 1.203524381  | 0.228773462 | 0.387645455 |
| ENSG00000170836 | 402.233047  | -0.127433282 | 0.098293632 | -1.296455115 | 0.194818734 | 0.346015632 |
| ENSG00000170837 | 25.29113734 | 0.873191297  | 0.349050059 | 2.501621972  | 0.012362585 | 0.03864505  |
| ENSG00000170846 | 135.1544303 | 0.094363267  | 0.154571899 | 0.610481385  | 0.541542971 | 0.691142874 |
| ENSG00000170852 | 271.9615854 | -0.141502626 | 0.115742924 | -1.222559628 | 0.221496069 | 0.379248572 |
| ENSG00000170854 | 266.1960036 | 0.388056229  | 0.116253417 | 3.338019976  | 0.000843777 | 0.003856991 |
| ENSG00000170855 | 74.22340189 | -0.581944981 | 0.212003782 | -2.744974525 | 0.00605156  | 0.020989199 |
| ENSG00000170860 | 712.5055456 | 0.433945752  | 0.08176186  | 5.307434916  | 1.11E-07    | 1.16E-06    |
| ENSG00000170871 | 537.9828727 | -0.304192589 | 0.094525064 | -3.218115668 | 0.001290358 | 0.005601195 |
| ENSG00000170873 | 33.32011095 | 0.253709294  | 0.310818563 | 0.816261716  | 0.414350465 | 0.582504102 |
| ENSG00000170876 | 302.9774679 | 0.280175806  | 0.108902897 | 2.572712139  | 0.01009051  | 0.032524412 |
| ENSG00000170881 | 226.2233608 | 0.056722517  | 0.130312035 | 0.435282263  | 0.663357558 | 0.784755231 |
| ENSG00000170889 | 3948.730814 | 0.128857452  | 0.05972112  | 2.157652984  | 0.030954822 | 0.082587347 |
| ENSG00000170892 | 131.8641453 | -0.238006086 | 0.156506974 | -1.520737888 | 0.128325627 | 0.253993248 |
| ENSG00000170899 | 166.7783048 | -0.011728999 | 0.143876346 | -0.081521385 | 0.935027319 | 0.964624614 |
| ENSG00000170903 | 161.2195566 | -0.144973164 | 0.14462988  | -1.002373533 | 0.31616322  | 0.487716314 |
| ENSG00000170906 | 1303.431195 | 0.114788577  | 0.070065231 | 1.638310127  | 0.101357016 | 0.211912997 |
| ENSG00000170915 | 15.76045067 | -0.157085814 | 0.439077969 | -0.357762914 | 0.720520746 | 0.826419116 |
| ENSG00000170917 | 40.12213752 | -0.531854823 | 0.276356863 | -1.924521857 | 0.054289204 | 0.130092195 |
| ENSG00000170919 | 93.9402169  | -0.163698694 | 0.190108606 | -0.861079874 | 0.389194053 | 0.557687326 |
| ENSG00000170921 | 586.8590601 | -1.068978518 | 0.095273375 | -11.22011811 | 3.25E-29    | 1.70E-27    |
| ENSG00000170946 | 108.8622615 | -0.247881693 | 0.169832751 | -1.459563551 | 0.144410063 | 0.277272848 |
| ENSG00000170949 | 252.7220091 | 0.339433721  | 0.124084063 | 2.735514245  | 0.006228289 | 0.021517161 |
| ENSG00000170959 | 53.72474595 | -6.631606557 | 0.856076346 | -7.746513016 | 9.45E-15    | 2.23E-13    |
| ENSG00000171004 | 214.0376903 | -0.270705627 | 0.13133644  | -2.061161591 | 0.039287627 | 0.100340598 |
| ENSG00000171016 | 238.2486707 | -0.224454505 | 0.125143125 | -1.793582392 | 0.072879849 | 0.163903817 |
| ENSG00000171044 | 38.49502661 | -0.605076819 | 0.283626872 | -2.133355048 | 0.032895612 | 0.086809066 |
| ENSG00000171045 | 50.90631372 | 0.266176356  | 0.262872031 | 1.01257009   | 0.311265552 | 0.482652303 |
| ENSG00000171055 | 321.3345147 | -0.01189358  | 0.119273693 | -0.099716708 | 0.920569236 | 0.956523119 |
| ENSG00000171056 | 65.56950788 | 0.727519448  | 0.225640572 | 3.224240401  | 0.001263073 | 0.005501516 |
| ENSG00000171067 | 473.0493982 | 0.089007538  | 0.093507051 | 0.951880495  | 0.341157593 | 0.51308787  |
| ENSG00000171100 | 54.43386225 | -0.937764499 | 0.24902676  | -3.76571778  | 0.000166071 | 0.000905591 |
| ENSG00000171103 | 76.92785246 | -0.010234484 | 0.210772419 | -0.048557036 | 0.96127231  | 0.979613475 |
| ENSG00000171105 | 363.6717683 | -1.011367787 | 0.105616046 | -9.575891367 | 1.01E-21    | 3.74E-20    |
| ENSG00000171109 | 184.1716897 | 0.316181037  | 0.137674345 | 2.296586458  | 0.021642372 | 0.061565492 |
| ENSG00000171119 | 82.87628976 | 0.502090285  | 0.197825748 | 2.53804315   | 0.011147424 | 0.035376774 |
| ENSG00000171126 | 90.05573383 | 0.634738929  | 0.194491472 | 3.263582311  | 0.001100132 | 0.004887273 |
| ENSG00000171130 | 227.4637974 | 0.622078862  | 0.127365375 | 4.884207064  | 1.04E-06    | 9.17E-06    |
| ENSG00000171132 | 211.1260812 | 0.106025655  | 0.128436361 | 0.825511198  | 0.409081428 | 0.577637398 |
| ENSG00000171135 | 250.9136624 | -0.073952814 | 0.123751465 | -0.597591421 | 0.55011259  | 0.698177769 |
| ENSG00000171148 | 930.3676676 | 0.234408588  | 0.076329298 | 3.071017217  | 0.002133308 | 0.008608614 |
| ENSG00000171150 | 236.6146599 | 0.143068283  | 0.125056369 | 1.14403036   | 0.252611046 | 0.417265683 |
| ENSG00000171155 | 85.90689901 | 0.223783188  | 0.189501458 | 1.180904834  | 0.237640531 | 0.398964567 |
| ENSG00000171159 | 443.3622833 | 0.439833485  | 0.104152275 | 4.222984903  | 2.41E-05    | 0.000159144 |
| ENSG00000171160 | 42.24693152 | -0.495517546 | 0.277080009 | -1.788355457 | 0.073718678 | 0.165234764 |
| ENSG00000171161 | 389.0305754 | -0.089868146 | 0.103092566 | -0.871722855 | 0.383359589 | 0.552575821 |



|                 |             |              |             |              |             |             |
|-----------------|-------------|--------------|-------------|--------------|-------------|-------------|
| ENSG00000171163 | 510.3481375 | 0.619853047  | 0.094709874 | 6.544756323  | 5.96E-11    | 9.78E-10    |
| ENSG00000171169 | 96.29331316 | 0.450044544  | 0.182388235 | 2.467508627  | 0.013605694 | 0.041866197 |
| ENSG00000171174 | 10.75186069 | -2.035427324 | 0.607032887 | -3.353075864 | 0.000799188 | 0.003673493 |
| ENSG00000171202 | 35.00588597 | 0.313458256  | 0.289329069 | 1.083397038  | 0.27863223  | 0.447410486 |
| ENSG00000171204 | 72.85360923 | 0.26455785   | 0.219057645 | 1.20770882   | 0.227159284 | 0.385691383 |
| ENSG00000171206 | 439.123004  | 0.422154668  | 0.100813876 | 4.187465891  | 2.82E-05    | 0.000183533 |
| ENSG00000171208 | 151.6812469 | -0.625607003 | 0.148854379 | -4.202812228 | 2.64E-05    | 0.000172476 |
| ENSG00000171219 | 100.0459049 | 0.422441228  | 0.178655099 | 2.364562958  | 0.018051359 | 0.05314765  |
| ENSG00000171222 | 177.5804191 | 0.537917523  | 0.140268805 | 3.83490488   | 0.000125613 | 0.000708913 |
| ENSG00000171223 | 1200.241854 | 0.318194049  | 0.098166668 | 3.241365487  | 0.001189586 | 0.005218647 |
| ENSG00000171224 | 21.53252847 | -0.003604019 | 0.36795814  | -0.009794645 | 0.992185129 | 0.996085228 |
| ENSG00000171227 | 10.81098862 | -3.858965787 | 0.84799647  | -4.550686144 | 5.35E-06    | 4.07E-05    |
| ENSG00000171241 | 193.9191433 | 0.27579069   | 0.141527545 | 1.948671483  | 0.051334669 | 0.124370145 |
| ENSG00000171243 | 28.70866939 | -0.669875793 | 0.341806455 | -1.959810246 | 0.050017973 | 0.121894946 |
| ENSG00000171246 | 20.99758576 | -0.152035465 | 0.372534107 | -0.408111532 | 0.683191794 | 0.799666288 |
| ENSG00000171262 | 280.9392932 | -0.129028629 | 0.1218917   | -1.058551396 | 0.289804132 | 0.460038269 |
| ENSG00000171295 | 73.84540788 | -0.169323271 | 0.209588337 | -0.807884991 | 0.419156792 | 0.586969939 |
| ENSG00000171298 | 618.9391786 | -0.136074343 | 0.10500034  | -1.295941933 | 0.194995491 | 0.346195862 |
| ENSG00000171302 | 395.1623191 | 0.09597333   | 0.09933829  | 0.966126255  | 0.333981008 | 0.505990311 |
| ENSG00000171307 | 191.0248635 | -0.131692472 | 0.141111116 | -0.933253707 | 0.350688991 | 0.522500564 |
| ENSG00000171310 | 84.68290662 | -0.559217651 | 0.196847597 | -2.840866037 | 0.004499121 | 0.016360121 |
| ENSG00000171311 | 161.1691938 | 0.15837538   | 0.146144138 | 1.083693005  | 0.278500938 | 0.447353079 |
| ENSG00000171314 | 220.8756254 | 0.29406353   | 0.133092815 | 2.209462088  | 0.027142517 | 0.074270709 |
| ENSG00000171316 | 1318.628661 | -0.051367413 | 0.069014617 | -0.744297584 | 0.456696463 | 0.620271199 |
| ENSG00000171320 | 165.1112202 | -0.223195421 | 0.142715633 | -1.563917106 | 0.117837037 | 0.238269304 |
| ENSG00000171357 | 32.29228973 | 0.738820295  | 0.320979535 | 2.301767606  | 0.021348281 | 0.060901565 |
| ENSG00000171365 | 252.0866261 | -0.12633629  | 0.1289207   | -0.97995349  | 0.327109077 | 0.499337232 |
| ENSG00000171368 | 16.39496453 | 0.864522487  | 0.429980828 | 2.010607056  | 0.044366978 | 0.11099251  |
| ENSG00000171421 | 121.9024224 | 0.070142499  | 0.166198815 | 0.422039708  | 0.672996034 | 0.791624124 |
| ENSG00000171425 | 171.8671236 | 0.126623021  | 0.141996526 | 0.891733231  | 0.372535937 | 0.543068941 |
| ENSG00000171428 | 11.48897504 | -0.220353638 | 0.514563344 | -0.428234231 | 0.668480597 | 0.788094582 |
| ENSG00000171435 | 16.94680598 | -3.33662202  | 0.615716932 | -5.419084396 | 5.99E-08    | 6.55E-07    |
| ENSG00000171443 | 38.70828922 | 0.217259891  | 0.275927172 | 0.787381283  | 0.4310587   | 0.597552486 |
| ENSG00000171444 | 223.6445822 | -0.051217022 | 0.131007537 | -0.390947141 | 0.695836308 | 0.809006175 |
| ENSG00000171448 | 52.42568526 | 0.148903561  | 0.253665427 | 0.587007707  | 0.557198531 | 0.704307366 |
| ENSG00000171453 | 172.4845878 | 0.196817189  | 0.14216447  | 1.384433041  | 0.166225898 | 0.308003586 |
| ENSG00000171456 | 873.994308  | -0.192617479 | 0.075710047 | -2.544146873 | 0.010954501 | 0.034861323 |
| ENSG00000171462 | 44.63978478 | -3.26000724  | 0.377278865 | -8.640842473 | 5.58E-18    | 1.66E-16    |
| ENSG00000171466 | 281.3132496 | 0.161314486  | 0.112893517 | 1.428908323  | 0.153030585 | 0.28947221  |
| ENSG00000171467 | 465.6824249 | -0.305059131 | 0.097813461 | -3.11878477  | 0.001815986 | 0.007522604 |
| ENSG00000171469 | 156.1853457 | 0.353438357  | 0.143878274 | 2.456509563  | 0.014029407 | 0.042943046 |
| ENSG00000171475 | 575.548832  | 0.118519025  | 0.086754691 | 1.366139672  | 0.171895128 | 0.315099944 |
| ENSG00000171488 | 33.60552744 | -1.37708333  | 0.320329905 | -4.298953382 | 1.72E-05    | 0.000116847 |
| ENSG00000171490 | 2339.952983 | 0.254933464  | 0.067303646 | 3.78781059   | 0.000151981 | 0.000838191 |
| ENSG00000171492 | 125.3928687 | -0.671324851 | 0.165965495 | -4.0449664   | 5.23E-05    | 0.000320021 |
| ENSG00000171497 | 427.3679514 | 0.414337605  | 0.099874842 | 4.14856831   | 3.35E-05    | 0.000214397 |
| ENSG00000171503 | 208.6963449 | 0.466368269  | 0.143194397 | 3.25688908   | 0.001126404 | 0.004991357 |
| ENSG00000171517 | 76.96393769 | -1.867923713 | 0.229385631 | -8.143159223 | 3.85E-16    | 1.01E-14    |
| ENSG00000171530 | 902.2259419 | 0.378671429  | 0.076651472 | 4.940171635  | 7.81E-07    | 7.08E-06    |
| ENSG00000171540 | 28.39357681 | -2.134579259 | 0.395349687 | -5.39921828  | 6.69E-08    | 7.25E-07    |

|                 |             |              |             |              |             |             |
|-----------------|-------------|--------------|-------------|--------------|-------------|-------------|
| ENSG00000171551 | 20.1388827  | -1.238184713 | 0.451861482 | -2.740186458 | 0.006140434 | 0.021255464 |
| ENSG00000171552 | 213.7538116 | 0.332732675  | 0.133141798 | 2.499085036  | 0.012451443 | 0.03887651  |
| ENSG00000171566 | 196.7939408 | 0.044059861  | 0.134109017 | 0.328537647  | 0.742505184 | 0.842621612 |
| ENSG00000171574 | 86.87280785 | 0.002666627  | 0.19224462  | 0.013871009  | 0.988932891 | 0.994454887 |
| ENSG00000171603 | 1493.074026 | 0.123916043  | 0.069804981 | 1.775174787  | 0.075869031 | 0.169002899 |
| ENSG00000171604 | 19.8327304  | 1.25663672   | 0.940086306 | 1.336724843  | 0.18131247  | 0.327968244 |
| ENSG00000171606 | 167.912292  | 0.157672328  | 0.141058808 | 1.117777262  | 0.263662135 | 0.430208156 |
| ENSG00000171608 | 49.60817481 | -0.776689505 | 0.266863431 | -2.91043813  | 0.003609224 | 0.013559447 |
| ENSG00000171612 | 81.08649463 | 0.034620616  | 0.194760177 | 0.17776024   | 0.858911274 | 0.919492083 |
| ENSG00000171617 | 64.11203777 | 0.308168407  | 0.238350698 | 1.292920096  | 0.196038696 | 0.347103126 |
| ENSG00000171621 | 30.56890568 | -0.208146539 | 0.31075935  | -0.669799765 | 0.502985443 | 0.660882428 |
| ENSG00000171634 | 2357.304382 | -0.11578323  | 0.064638317 | -1.791247597 | 0.073253571 | 0.164435711 |
| ENSG00000171680 | 106.0465504 | -0.396283026 | 0.176982688 | -2.239106151 | 0.02514901  | 0.069623206 |
| ENSG00000171681 | 1183.746335 | 0.312466328  | 0.085944997 | 3.635654655  | 0.000277276 | 0.001435111 |
| ENSG00000171700 | 104.6506738 | -0.016457393 | 0.175834279 | -0.093596047 | 0.92543005  | 0.959161508 |
| ENSG00000171703 | 212.186924  | -0.511190731 | 0.130707824 | -3.910942096 | 9.19E-05    | 0.000533651 |
| ENSG00000171720 | 223.1858252 | 0.09377216   | 0.124570065 | 0.752766407  | 0.451590297 | 0.616629899 |
| ENSG00000171723 | 339.7216176 | -0.065995996 | 0.104389469 | -0.632209333 | 0.5272501   | 0.680224298 |
| ENSG00000171729 | 30.50544776 | -0.020391191 | 0.32016924  | -0.063688788 | 0.949218033 | 0.971841524 |
| ENSG00000171735 | 111.0995426 | -0.069945449 | 0.1753722   | -0.398840003 | 0.6900111   | 0.804902039 |
| ENSG00000171763 | 70.74979391 | 0.20789654   | 0.21237326  | 0.978920508  | 0.327619258 | 0.499953039 |
| ENSG00000171766 | 246.145589  | -0.698423793 | 0.136145487 | -5.129981213 | 2.90E-07    | 2.83E-06    |
| ENSG00000171791 | 68.53752544 | -0.191884799 | 0.210389937 | -0.91204362  | 0.361745756 | 0.532534336 |
| ENSG00000171792 | 196.9041472 | -0.173854757 | 0.133961444 | -1.29779698  | 0.194357108 | 0.345411727 |
| ENSG00000171793 | 943.2831822 | 0.006719295  | 0.079038942 | 0.085012463  | 0.932251482 | 0.96324653  |
| ENSG00000171806 | 33.69704365 | 0.204873506  | 0.294925669 | 0.694661494  | 0.487267465 | 0.647676578 |
| ENSG00000171813 | 132.9812438 | 0.722724948  | 0.156391649 | 4.621250241  | 3.81E-06    | 3.00E-05    |
| ENSG00000171823 | 207.5602022 | 0.257505185  | 0.126878073 | 2.029548359  | 0.042402469 | 0.107242974 |
| ENSG00000171824 | 781.7390734 | -0.335251902 | 0.092259284 | -3.633801254 | 0.000279276 | 0.0014444   |
| ENSG00000171827 | 30.35320255 | -0.126436935 | 0.322135643 | -0.39249595  | 0.694691803 | 0.808344579 |
| ENSG00000171848 | 1516.542344 | -0.142586054 | 0.071536014 | -1.993206562 | 0.046238833 | 0.11461764  |
| ENSG00000171853 | 354.022336  | 0.028795398  | 0.108202043 | 0.266126194  | 0.790142022 | 0.874665498 |
| ENSG00000171858 | 6311.874117 | 0.467028913  | 0.07156958  | 6.525522599  | 6.78E-11    | 1.10E-09    |
| ENSG00000171861 | 116.2646611 | -0.196021249 | 0.177448936 | -1.104662861 | 0.269305702 | 0.436526332 |
| ENSG00000171862 | 514.9628595 | -0.609344007 | 0.089808783 | -6.784904368 | 1.16E-11    | 2.03E-10    |
| ENSG00000171863 | 2631.966894 | 0.218009806  | 0.066719395 | 3.267562713  | 0.001084778 | 0.004826945 |
| ENSG00000171865 | 239.4152587 | -0.017853807 | 0.126566545 | -0.141062606 | 0.887820484 | 0.938532085 |
| ENSG00000171867 | 649.8511123 | -0.207060945 | 0.084725891 | -2.443892217 | 0.014529767 | 0.044286565 |
| ENSG00000171914 | 243.5088197 | -0.535737454 | 0.121252308 | -4.418369133 | 9.94E-06    | 7.13E-05    |
| ENSG00000171928 | 56.04933232 | 0.462878457  | 0.240715073 | 1.922930919  | 0.054488726 | 0.130481271 |
| ENSG00000171940 | 3993.059386 | -0.701519144 | 0.058744058 | -11.94195921 | 7.15E-33    | 4.27E-31    |
| ENSG00000171943 | 79.91559709 | 0.043250307  | 0.199975256 | 0.216278295  | 0.828770827 | 0.899949274 |
| ENSG00000171951 | 36.246783   | -0.103976676 | 0.305366018 | -0.340498517 | 0.733481139 | 0.835693316 |
| ENSG00000171953 | 90.12876571 | -0.237318938 | 0.191327981 | -1.240377578 | 0.21483577  | 0.370873549 |
| ENSG00000171960 | 432.3770326 | -0.737859402 | 0.102031282 | -7.231697821 | 4.77E-13    | 9.80E-12    |
| ENSG00000171970 | 74.39929754 | 0.025185942  | 0.206370625 | 0.12204228   | 0.902865534 | 0.947590568 |
| ENSG00000171984 | 15.2466572  | 0.762845909  | 0.449784187 | 1.696026518  | 0.089880858 | 0.193119793 |
| ENSG00000171988 | 1422.668466 | -0.859774036 | 0.078300667 | -10.98041775 | 4.75E-28    | 2.41E-26    |
| ENSG00000171992 | 18.04046244 | 0.694226428  | 0.412699076 | 1.682161333  | 0.09253756  | 0.197579435 |
| ENSG00000172006 | 25.63435553 | -0.452683733 | 0.354072853 | -1.278504492 | 0.201071602 | 0.353410009 |

|                 |             |              |             |              |             |             |
|-----------------|-------------|--------------|-------------|--------------|-------------|-------------|
| ENSG00000172007 | 63.48356777 | -0.201377224 | 0.244886761 | -0.822327934 | 0.410890283 | 0.579262926 |
| ENSG00000172009 | 654.8973629 | 0.254602964  | 0.089823746 | 2.834472793  | 0.004590137 | 0.016656587 |
| ENSG00000172031 | 28.04789383 | 1.10422524   | 0.342254197 | 3.226330754  | 0.001253884 | 0.00546997  |
| ENSG00000172037 | 1346.326857 | -0.213886329 | 0.067462658 | -3.170440288 | 0.001522081 | 0.00646919  |
| ENSG00000172046 | 512.1412604 | 0.056095012  | 0.089561688 | 0.626328217  | 0.531099682 | 0.683094573 |
| ENSG00000172053 | 1079.931871 | -0.179713343 | 0.074513745 | -2.411814661 | 0.015873348 | 0.047817483 |
| ENSG00000172057 | 112.257104  | 0.320784459  | 0.17179298  | 1.867273382  | 0.061863421 | 0.144351407 |
| ENSG00000172059 | 145.0492428 | -0.177929921 | 0.158475897 | -1.122756993 | 0.261540715 | 0.42784004  |
| ENSG00000172061 | 10.89496704 | 0.417859033  | 0.527950689 | 0.791473601  | 0.428667675 | 0.595656824 |
| ENSG00000172062 | 14.58286649 | 0.121727115  | 0.457464147 | 0.26609105   | 0.790169088 | 0.874665498 |
| ENSG00000172071 | 150.6021538 | -0.054047659 | 0.16031568  | -0.337132707 | 0.736016862 | 0.837626903 |
| ENSG00000172081 | 346.109272  | 0.105953864  | 0.106118478 | 0.998448776  | 0.318061792 | 0.48988389  |
| ENSG00000172086 | 133.6657507 | -0.741746885 | 0.165419242 | -4.484042333 | 7.32E-06    | 5.41E-05    |
| ENSG00000172113 | 280.4924135 | 0.416508564  | 0.116681999 | 3.569604286  | 0.000357521 | 0.001796814 |
| ENSG00000172115 | 906.6011005 | 0.338053743  | 0.096653569 | 3.497581594  | 0.000469497 | 0.002289145 |
| ENSG00000172167 | 132.6745834 | 0.056335384  | 0.154250583 | 0.365219912  | 0.714947256 | 0.822444034 |
| ENSG00000172171 | 52.66598252 | -0.133766936 | 0.242645605 | -0.551285221 | 0.581438168 | 0.723809106 |
| ENSG00000172172 | 230.6798006 | 0.52315511   | 0.138600125 | 3.774564488  | 0.000160287 | 0.000878143 |
| ENSG00000172175 | 224.2635994 | -0.177106014 | 0.129123753 | -1.371599035 | 0.170188294 | 0.313115255 |
| ENSG00000172183 | 61.35008244 | -1.40E-05    | 0.248157968 | -5.65E-05    | 0.999954923 | 0.999954923 |
| ENSG00000172197 | 27.33571859 | 0.293395928  | 0.330564212 | 0.887561079  | 0.374776897 | 0.544696439 |
| ENSG00000172201 | 366.019793  | 0.651825464  | 0.11685198  | 5.578214965  | 2.43E-08    | 2.83E-07    |
| ENSG00000172216 | 143.5525998 | -0.32378012  | 0.162698417 | -1.99006313  | 0.046583982 | 0.115408323 |
| ENSG00000172232 | 7.515100823 | -1.213134807 | 0.653424167 | -1.856580867 | 0.063370808 | 0.147159818 |
| ENSG00000172239 | 191.8297699 | -0.041946196 | 0.136384114 | -0.307559253 | 0.75841773  | 0.854466943 |
| ENSG00000172244 | 51.92793891 | -0.080054921 | 0.243136128 | -0.32925967  | 0.741959425 | 0.842206387 |
| ENSG00000172260 | 88.81609322 | 0.538593348  | 0.192280315 | 2.801084177  | 0.005093123 | 0.018176601 |
| ENSG00000172262 | 381.5236293 | 0.051593137  | 0.100290264 | 0.514438139  | 0.6069457   | 0.743700634 |
| ENSG00000172269 | 227.9041197 | 0.490559533  | 0.131109458 | 3.741602939  | 0.00018285  | 0.000988264 |
| ENSG00000172270 | 2837.562677 | 0.155632063  | 0.060651276 | 2.56601464   | 0.010287449 | 0.03309844  |
| ENSG00000172273 | 68.51213769 | 0.111120753  | 0.210839461 | 0.52703964   | 0.598166062 | 0.737250037 |
| ENSG00000172292 | 529.5400213 | 0.386151626  | 0.099688126 | 3.873597022  | 0.000107241 | 0.00061436  |
| ENSG00000172301 | 287.7009535 | 0.339644266  | 0.111831533 | 3.037106396  | 0.002388611 | 0.009502357 |
| ENSG00000172315 | 51.34644495 | 0.065401065  | 0.243394851 | 0.268703567  | 0.788157807 | 0.873316329 |
| ENSG00000172331 | 70.72347154 | -1.058506609 | 0.241921318 | -4.375416839 | 1.21E-05    | 8.53E-05    |
| ENSG00000172336 | 264.3397391 | 0.106159172  | 0.1141481   | 0.930012604  | 0.352364559 | 0.52377407  |
| ENSG00000172339 | 25.18082338 | 0.399080833  | 0.353270158 | 1.129676038  | 0.258612758 | 0.424384744 |
| ENSG00000172340 | 575.1074332 | -0.104448808 | 0.085396112 | -1.223109638 | 0.221288289 | 0.379077633 |
| ENSG00000172346 | 13.89338631 | -2.927051263 | 0.611898575 | -4.783556268 | 1.72E-06    | 1.45E-05    |
| ENSG00000172350 | 6.949870169 | -1.790821079 | 0.719124685 | -2.490278967 | 0.012764286 | 0.039729654 |
| ENSG00000172354 | 962.4187303 | 0.164539083  | 0.072729743 | 2.262335544  | 0.02367668  | 0.066235707 |
| ENSG00000172361 | 10.87754009 | -0.153405159 | 0.531320796 | -0.288724176 | 0.77279246  | 0.863872011 |
| ENSG00000172366 | 208.5003192 | 0.286133092  | 0.350113439 | 0.817258239  | 0.413780867 | 0.582182384 |
| ENSG00000172375 | 81.33510843 | -0.138207021 | 0.202208289 | -0.683488405 | 0.494298274 | 0.653493035 |
| ENSG00000172379 | 133.2321667 | -1.008393732 | 0.164825662 | -6.117941329 | 9.48E-10    | 1.32E-08    |
| ENSG00000172380 | 518.1722965 | 0.467582318  | 0.094451876 | 4.95048205   | 7.40E-07    | 6.75E-06    |
| ENSG00000172382 | 6.931731045 | -2.292843285 | 0.771324869 | -2.972603861 | 0.002952853 | 0.011378779 |
| ENSG00000172403 | 158.0717627 | -2.341900714 | 0.172767667 | -13.5552025  | 7.38E-42    | 6.10E-40    |
| ENSG00000172409 | 54.27322682 | -0.18634089  | 0.242550649 | -0.768255582 | 0.442335358 | 0.607378766 |
| ENSG00000172426 | 16.27519059 | 0.323725137  | 0.438001334 | 0.739096236  | 0.459848562 | 0.62308216  |

|                 |             |              |             |              |             |             |
|-----------------|-------------|--------------|-------------|--------------|-------------|-------------|
| ENSG00000172428 | 148.1206889 | 0.500870342  | 0.154719512 | 3.237279745  | 0.001206751 | 0.005280755 |
| ENSG00000172432 | 333.4482529 | -0.132876341 | 0.115108614 | -1.154356185 | 0.248354171 | 0.412635231 |
| ENSG00000172456 | 20.39335627 | -0.453793127 | 0.3842134   | -1.181096564 | 0.237564365 | 0.398884369 |
| ENSG00000172458 | 14.02757414 | 0.409603137  | 0.460987557 | 0.888534042  | 0.374253553 | 0.544273699 |
| ENSG00000172465 | 21.55756655 | 0.4016038    | 0.374199276 | 1.073235107  | 0.283165643 | 0.452620367 |
| ENSG00000172466 | 832.6472496 | -0.179631601 | 0.082601001 | -2.174690379 | 0.029653326 | 0.079751154 |
| ENSG00000172469 | 92.57602656 | 0.168689859  | 0.183716926 | 0.918205322  | 0.358511383 | 0.529791585 |
| ENSG00000172493 | 523.7967311 | -0.136298007 | 0.090083992 | -1.51301028  | 0.130277048 | 0.257058813 |
| ENSG00000172500 | 273.1781332 | 0.336346051  | 0.112930585 | 2.978343313  | 0.002898112 | 0.011199388 |
| ENSG00000172530 | 167.5808589 | 0.141016838  | 0.142171489 | 0.991878465  | 0.321256815 | 0.492989334 |
| ENSG00000172531 | 723.7978227 | 0.159356567  | 0.087023933 | 1.831180935  | 0.067073541 | 0.153875884 |
| ENSG00000172534 | 4512.607072 | 0.433098921  | 0.069030438 | 6.274028273  | 3.52E-10    | 5.21E-09    |
| ENSG00000172586 | 474.4635372 | 0.14488254   | 0.102082885 | 1.419263768  | 0.155822131 | 0.293315264 |
| ENSG00000172590 | 182.0100427 | 0.36663321   | 0.138914369 | 2.639274925  | 0.008308357 | 0.027636158 |
| ENSG00000172594 | 7.875816468 | -2.205305944 | 0.740739493 | -2.97716804  | 0.002909245 | 0.011239319 |
| ENSG00000172613 | 106.3137724 | -0.000841516 | 0.173201311 | -0.004858602 | 0.996123411 | 0.998255373 |
| ENSG00000172638 | 274.7771937 | 0.254627752  | 0.119219452 | 2.135790325  | 0.032696508 | 0.086397263 |
| ENSG00000172661 | 217.1839205 | -0.016697449 | 0.127588147 | -0.130869906 | 0.895878221 | 0.943561301 |
| ENSG00000172663 | 175.0231535 | 0.05648087   | 0.1376374   | 0.410359903  | 0.681541956 | 0.798400454 |
| ENSG00000172667 | 243.6590128 | -0.270035372 | 0.125853626 | -2.145630454 | 0.031902474 | 0.084585513 |
| ENSG00000172671 | 118.3220012 | 0.002847138  | 0.163025423 | 0.017464379  | 0.98606615  | 0.992634039 |
| ENSG00000172716 | 254.7202578 | 0.121092834  | 0.124834231 | 0.970029078  | 0.332031998 | 0.504440134 |
| ENSG00000172725 | 589.9276971 | 0.09193213   | 0.090068842 | 1.020687375  | 0.307402578 | 0.478511083 |
| ENSG00000172728 | 135.9778408 | 0.013348889  | 0.158178323 | 0.084391394  | 0.93274525  | 0.963270344 |
| ENSG00000172731 | 73.9921642  | -0.184642958 | 0.207278874 | -0.890794873 | 0.373039226 | 0.54340148  |
| ENSG00000172732 | 227.0920912 | 0.069429748  | 0.12946285  | 0.536290899  | 0.59175752  | 0.732260534 |
| ENSG00000172748 | 15.54791576 | 0.231641786  | 0.449325951 | 0.515531733  | 0.606181501 | 0.743151644 |
| ENSG00000172757 | 2327.829675 | 0.216157827  | 0.064323774 | 3.360465542  | 0.000778112 | 0.003590718 |
| ENSG00000172765 | 220.388153  | 0.08388817   | 0.123009199 | 0.681966637  | 0.495260047 | 0.654135261 |
| ENSG00000172766 | 275.1033225 | 0.040022202  | 0.113410237 | 0.352897609  | 0.724165203 | 0.829245016 |
| ENSG00000172775 | 459.7071596 | 0.075335894  | 0.100161066 | 0.752147483  | 0.451962372 | 0.616859253 |
| ENSG00000172780 | 7.575651785 | 0.217283979  | 0.686121639 | 0.316684342  | 0.751483131 | 0.849515817 |
| ENSG00000172785 | 21.64384753 | 0.134009364  | 0.384654145 | 0.348389237  | 0.727547885 | 0.831595187 |
| ENSG00000172789 | 14.45546589 | -1.139803192 | 0.473579352 | -2.406783968 | 0.016093687 | 0.048325784 |
| ENSG00000172795 | 368.3450043 | -0.575549027 | 0.103245466 | -5.574569489 | 2.48E-08    | 2.88E-07    |
| ENSG00000172799 | 10.81000767 | 1.126313685  | 0.548122864 | 2.054856235  | 0.039892893 | 0.101627759 |
| ENSG00000172809 | 9302.434467 | 0.248343939  | 0.060526312 | 4.103074027  | 4.08E-05    | 0.000255894 |
| ENSG00000172819 | 284.9944674 | 0.260274175  | 0.110955821 | 2.345746022  | 0.018989042 | 0.055340057 |
| ENSG00000172828 | 36.81260714 | -2.639958214 | 0.373543863 | -7.067331239 | 1.58E-12    | 3.09E-11    |
| ENSG00000172830 | 141.8309558 | 2.922148996  | 0.188823205 | 15.47558204  | 5.07E-54    | 5.94E-52    |
| ENSG00000172831 | 278.6921643 | 0.159440989  | 0.11637126  | 1.370106235  | 0.170653742 | 0.313766114 |
| ENSG00000172840 | 362.694497  | 0.261136757  | 0.106217025 | 2.458520717  | 0.013951073 | 0.042760357 |
| ENSG00000172845 | 635.3663714 | -0.079037785 | 0.088171998 | -0.896404602 | 0.37003671  | 0.541314309 |
| ENSG00000172869 | 312.8867033 | -0.026259376 | 0.10955659  | -0.239687778 | 0.81057231  | 0.888429248 |
| ENSG00000172878 | 573.0536785 | -0.800414342 | 0.091766434 | -8.722299768 | 2.73E-18    | 8.37E-17    |
| ENSG00000172888 | 320.9648128 | 0.124372904  | 0.107107565 | 1.16119626   | 0.245562095 | 0.40905007  |
| ENSG00000172889 | 358.7520339 | 0.83918138   | 0.121241238 | 6.921583706  | 4.47E-12    | 8.24E-11    |
| ENSG00000172890 | 215.9090538 | 0.507730435  | 0.129592982 | 3.917885257  | 8.93E-05    | 0.00052002  |
| ENSG00000172893 | 1095.704972 | 1.005191245  | 0.087416043 | 11.49893328  | 1.34E-30    | 7.47E-29    |
| ENSG00000172915 | 239.5479492 | 0.099018107  | 0.122127301 | 0.810777818  | 0.417493275 | 0.585515978 |

|                 |             |              |             |              |             |             |
|-----------------|-------------|--------------|-------------|--------------|-------------|-------------|
| ENSG00000172922 | 343.9504951 | 0.5406974    | 0.109166842 | 4.952945336  | 7.31E-07    | 6.67E-06    |
| ENSG00000172932 | 422.1962494 | 0.287931706  | 0.107985869 | 2.666383187  | 0.007667225 | 0.025802948 |
| ENSG00000172939 | 596.0939544 | 0.158063027  | 0.083876606 | 1.88447094   | 0.059501302 | 0.139836798 |
| ENSG00000172943 | 472.3879603 | 0.00407686   | 0.091899934 | 0.044361949  | 0.964615892 | 0.981383315 |
| ENSG00000172954 | 416.0374223 | -0.290536045 | 0.098782224 | -2.941177404 | 0.003269672 | 0.012430064 |
| ENSG00000172965 | 195.704517  | -0.212448444 | 0.144922136 | -1.465948885 | 0.142662213 | 0.274743091 |
| ENSG00000172974 | 13.3567661  | -0.653621646 | 0.497884685 | -1.31279725  | 0.189251277 | 0.338478825 |
| ENSG00000172977 | 280.5867891 | 0.156499422  | 0.118100536 | 1.325137272  | 0.185125626 | 0.332965386 |
| ENSG00000172985 | 111.832773  | 1.046790922  | 0.323545478 | 3.235374908  | 0.001214831 | 0.00531446  |
| ENSG00000172986 | 86.94568425 | -0.548977771 | 0.192453517 | -2.852521377 | 0.004337389 | 0.015866487 |
| ENSG00000172987 | 30.44979375 | -8.209335504 | 1.207450818 | -6.798898456 | 1.05E-11    | 1.86E-10    |
| ENSG00000172992 | 309.1764957 | -0.303228013 | 0.111702157 | -2.714611983 | 0.006635346 | 0.0227278   |
| ENSG00000173011 | 227.3256117 | -0.056032167 | 0.123043568 | -0.455384773 | 0.648832448 | 0.773893979 |
| ENSG00000173013 | 26.68816029 | -0.96731757  | 0.346873221 | -2.788677565 | 0.005292373 | 0.018770925 |
| ENSG00000173020 | 482.2165372 | 0.21744863   | 0.108869092 | 1.997340354  | 0.045788222 | 0.113838436 |
| ENSG00000173039 | 707.4136973 | 0.421454562  | 0.080580963 | 5.230200135  | 1.69E-07    | 1.72E-06    |
| ENSG00000173064 | 836.0489063 | -0.171507947 | 0.077625555 | -2.209426342 | 0.027145    | 0.074270709 |
| ENSG00000173065 | 491.7087343 | -0.096657447 | 0.09055121  | -1.067434069 | 0.285775871 | 0.455496841 |
| ENSG00000173083 | 20.03275945 | 1.349485814  | 0.41248836  | 3.271573081  | 0.001069509 | 0.004770848 |
| ENSG00000173085 | 116.682787  | -0.093074237 | 0.179164698 | -0.519489821 | 0.60341921  | 0.741253138 |
| ENSG00000173113 | 481.4466525 | 0.490922493  | 0.095667662 | 5.131540627  | 2.87E-07    | 2.81E-06    |
| ENSG00000173114 | 39.26308664 | 2.389351775  | 0.334771242 | 7.137267119  | 9.52E-13    | 1.89E-11    |
| ENSG00000173120 | 1041.948032 | 0.124370128  | 0.070696823 | 1.759203919  | 0.078542879 | 0.174048244 |
| ENSG00000173137 | 34.03152349 | -0.605060082 | 0.323343333 | -1.871261966 | 0.06130878  | 0.143295246 |
| ENSG00000173141 | 572.782839  | 0.17249732   | 0.09004942  | 1.915585027  | 0.055417937 | 0.132255481 |
| ENSG00000173145 | 191.3938667 | -0.000234508 | 0.131465122 | -0.001783805 | 0.998576731 | 0.999359314 |
| ENSG00000173153 | 230.8318163 | 0.356067225  | 0.130361001 | 2.731393765  | 0.006306707 | 0.021750629 |
| ENSG00000173157 | 97.59113057 | 1.264584135  | 0.20438957  | 6.187126551  | 6.13E-10    | 8.79E-09    |
| ENSG00000173163 | 42.39752266 | 0.019727931  | 0.264220864 | 0.074664548  | 0.940481616 | 0.967262249 |
| ENSG00000173166 | 285.5149162 | -0.317168945 | 0.117207819 | -2.706039134 | 0.006809102 | 0.023243611 |
| ENSG00000173171 | 106.7509358 | 0.053336629  | 0.173801377 | 0.306882662  | 0.758932686 | 0.854772887 |
| ENSG00000173193 | 694.1855215 | 0.602946471  | 0.085663454 | 7.038549587  | 1.94E-12    | 3.77E-11    |
| ENSG00000173207 | 327.6582293 | -0.27272624  | 0.110751314 | -2.462510205 | 0.013796825 | 0.042370791 |
| ENSG00000173208 | 41.58710435 | -1.083418414 | 0.282656499 | -3.832986037 | 0.000126597 | 0.000713894 |
| ENSG00000173209 | 231.3235437 | 0.019141588  | 0.153275603 | 0.124883461  | 0.900615812 | 0.946219171 |
| ENSG00000173213 | 12.48662594 | -0.876298064 | 0.520223096 | -1.684465896 | 0.092091665 | 0.196836826 |
| ENSG00000173214 | 139.8319549 | -0.348999442 | 0.164130957 | -2.126347443 | 0.03347434  | 0.088121076 |
| ENSG00000173218 | 167.2165771 | -0.544692183 | 0.142686905 | -3.817394349 | 0.000134869 | 0.000754479 |
| ENSG00000173221 | 267.7704243 | -0.856415672 | 0.126733473 | -6.757612255 | 1.40E-11    | 2.44E-10    |
| ENSG00000173226 | 148.9711778 | -0.085670573 | 0.148990425 | -0.575007238 | 0.565286402 | 0.710947988 |
| ENSG00000173227 | 10.6141189  | -1.149876894 | 0.55702858  | -2.064305021 | 0.038988805 | 0.099795144 |
| ENSG00000173230 | 1712.057126 | -0.250530588 | 0.06963378  | -3.597831212 | 0.000320882 | 0.001631352 |
| ENSG00000173258 | 40.03537453 | 0.157975306  | 0.274232292 | 0.576063835  | 0.564572035 | 0.710622166 |
| ENSG00000173264 | 192.7056741 | 0.115513071  | 0.136166821 | 0.848320241  | 0.396259648 | 0.564071674 |
| ENSG00000173267 | 24.69337456 | -0.710817934 | 0.395035867 | -1.799375685 | 0.071959273 | 0.16227515  |
| ENSG00000173272 | 503.5023099 | 0.436845431  | 0.09205767  | 4.745345287  | 2.08E-06    | 1.73E-05    |
| ENSG00000173273 | 643.2019366 | 0.00898284   | 0.083717327 | 0.107299648  | 0.914551264 | 0.953830969 |
| ENSG00000173275 | 65.4123386  | 0.134423436  | 0.229205197 | 0.586476389  | 0.557555423 | 0.704695072 |
| ENSG00000173276 | 285.5864017 | -0.325689602 | 0.129906185 | -2.507113901 | 0.012172148 | 0.038114615 |
| ENSG00000173281 | 70.16727763 | -0.473316917 | 0.220861352 | -2.143049983 | 0.032109085 | 0.08500496  |

|                 |             |              |             |              |             |             |
|-----------------|-------------|--------------|-------------|--------------|-------------|-------------|
| ENSG00000173320 | 374.0043253 | 0.05335353   | 0.106142005 | 0.502661787  | 0.615202081 | 0.74963078  |
| ENSG00000173327 | 235.0217146 | 0.040430491  | 0.148053369 | 0.273080518  | 0.784791322 | 0.871115267 |
| ENSG00000173334 | 238.8307552 | 0.640884401  | 0.125622197 | 5.10168122   | 3.37E-07    | 3.27E-06    |
| ENSG00000173349 | 47.31947827 | -0.569435736 | 0.265058014 | -2.148343779 | 0.031686455 | 0.084155727 |
| ENSG00000173376 | 223.07462   | -3.047167756 | 0.163038677 | -18.68984593 | 5.99E-78    | 1.05E-75    |
| ENSG00000173402 | 4118.110921 | -0.049481731 | 0.056036844 | -0.883021381 | 0.37722472  | 0.546670343 |
| ENSG00000173409 | 89.12423897 | -0.435019544 | 0.188362004 | -2.309486707 | 0.020916588 | 0.059913401 |
| ENSG00000173418 | 605.1244162 | 1.47348051   | 0.089693878 | 16.42788283  | 1.21E-60    | 1.60E-58    |
| ENSG00000173436 | 32.41139235 | -0.562642049 | 0.313229754 | -1.796259911 | 0.07245319  | 0.163170556 |
| ENSG00000173442 | 916.3920323 | -0.332747813 | 0.090090858 | -3.693469267 | 0.000221215 | 0.001170841 |
| ENSG00000173451 | 30.0360403  | -0.605082859 | 0.322533045 | -1.876033692 | 0.060650654 | 0.142135424 |
| ENSG00000173456 | 406.4877589 | -0.218331914 | 0.099326863 | -2.198115466 | 0.027940879 | 0.076033615 |
| ENSG00000173457 | 165.2285138 | 0.07223969   | 0.145511488 | 0.496453521  | 0.619574472 | 0.753046428 |
| ENSG00000173465 | 122.4918621 | 0.253213754  | 0.165865514 | 1.526620859  | 0.126855317 | 0.252037117 |
| ENSG00000173473 | 2547.063525 | 0.255268071  | 0.058500395 | 4.363527324  | 1.28E-05    | 8.95E-05    |
| ENSG00000173480 | 28.10879748 | -0.285294618 | 0.332225158 | -0.858738753 | 0.390484665 | 0.558795649 |
| ENSG00000173486 | 18.32206716 | -0.165762922 | 0.402250731 | -0.412088554 | 0.680274518 | 0.797381188 |
| ENSG00000173511 | 251.4101276 | -0.181190705 | 0.126334507 | -1.434213892 | 0.151511234 | 0.287449798 |
| ENSG00000173517 | 585.4417782 | -0.274759834 | 0.086067092 | -3.192391289 | 0.001411    | 0.006059408 |
| ENSG00000173530 | 188.904591  | -0.650344192 | 0.138841194 | -4.684086719 | 2.81E-06    | 2.27E-05    |
| ENSG00000173531 | 10.74827658 | 0.081056991  | 0.537272652 | 0.150867517  | 0.880080225 | 0.934004754 |
| ENSG00000173540 | 137.9569071 | 0.066285947  | 0.158616654 | 0.417900297  | 0.676020015 | 0.794117173 |
| ENSG00000173542 | 308.0767859 | -0.502603035 | 0.111919653 | -4.490748675 | 7.10E-06    | 5.26E-05    |
| ENSG00000173545 | 176.3084417 | 0.166190859  | 0.136831605 | 1.214564856  | 0.2245321   | 0.382778461 |
| ENSG00000173546 | 134.9752464 | -2.144120487 | 0.187472722 | -11.43697316 | 2.73E-30    | 1.50E-28    |
| ENSG00000173548 | 168.3811026 | 0.070883608  | 0.145748207 | 0.486342912  | 0.626724059 | 0.757754592 |
| ENSG00000173575 | 2661.752103 | -0.187399741 | 0.058968784 | -3.177948219 | 0.001483212 | 0.006330807 |
| ENSG00000173581 | 240.2589408 | -0.172875888 | 0.128429278 | -1.346078491 | 0.178277204 | 0.323966351 |
| ENSG00000173588 | 123.5888995 | -0.063272708 | 0.166494025 | -0.380029904 | 0.703923217 | 0.814364144 |
| ENSG00000173598 | 173.2960983 | 0.276342088  | 0.14283019  | 1.93475965   | 0.053019797 | 0.127616361 |
| ENSG00000173599 | 35.57381297 | 0.136386803  | 0.314840018 | 0.433193988  | 0.664873846 | 0.785659558 |
| ENSG00000173611 | 116.0246214 | -0.360294401 | 0.173101916 | -2.081400423 | 0.03739727  | 0.096455272 |
| ENSG00000173614 | 32.03012322 | -0.406888565 | 0.307223853 | -1.32440421  | 0.185368837 | 0.333274806 |
| ENSG00000173621 | 167.3778086 | 0.807673374  | 0.286916059 | 2.815016265  | 0.004877477 | 0.01752274  |
| ENSG00000173626 | 8.433192247 | -6.354898806 | 1.274591838 | -4.985830458 | 6.17E-07    | 5.73E-06    |
| ENSG00000173638 | 164.3653927 | 0.176940829  | 0.154779443 | 1.143180422  | 0.252963689 | 0.417651733 |
| ENSG00000173641 | 17.27046132 | -0.775009837 | 0.431240565 | -1.797163581 | 0.072309654 | 0.162960647 |
| ENSG00000173653 | 85.3615883  | 0.236850779  | 0.193023573 | 1.227056239  | 0.219801454 | 0.377312847 |
| ENSG00000173660 | 2403.631967 | 0.510246125  | 0.136224597 | 3.745624026  | 0.000179946 | 0.000974817 |
| ENSG00000173674 | 528.1086661 | 0.39591219   | 0.090743843 | 4.36296479   | 1.28E-05    | 8.97E-05    |
| ENSG00000173681 | 48.97516292 | -0.39245811  | 0.25207958  | -1.556881803 | 0.119498551 | 0.241142959 |
| ENSG00000173692 | 1286.96513  | 0.202284395  | 0.07131869  | 2.8363448    | 0.004563315 | 0.016572101 |
| ENSG00000173705 | 7.505617346 | -1.15181081  | 0.668735077 | -1.722372355 | 0.085002088 | 0.185120052 |
| ENSG00000173706 | 265.4055922 | 0.806581954  | 0.118633409 | 6.798944399  | 1.05E-11    | 1.86E-10    |
| ENSG00000173715 | 35.46905881 | 0.223376177  | 0.288555622 | 0.774118263  | 0.438860858 | 0.604227552 |
| ENSG00000173726 | 1635.168348 | -0.064080748 | 0.066283598 | -0.966766289 | 0.33366088  | 0.50583001  |
| ENSG00000173744 | 455.0093171 | -0.146767786 | 0.095282986 | -1.540335716 | 0.123478542 | 0.247326833 |
| ENSG00000173757 | 93.86970856 | -0.940838179 | 0.192848097 | -4.878649023 | 1.07E-06    | 9.39E-06    |
| ENSG00000173762 | 169.2200451 | 2.100185778  | 0.170823059 | 12.29450984  | 9.69E-35    | 6.19E-33    |
| ENSG00000173786 | 992.8694968 | 0.336409823  | 0.072986737 | 4.609191178  | 4.04E-06    | 3.15E-05    |

|                 |             |              |             |              |             |             |
|-----------------|-------------|--------------|-------------|--------------|-------------|-------------|
| ENSG00000173801 | 422.8129797 | -0.351879733 | 0.098419137 | -3.57531822  | 0.000349802 | 0.001762436 |
| ENSG00000173805 | 21.21306338 | -0.488591641 | 0.387972986 | -1.259344488 | 0.207905931 | 0.362114645 |
| ENSG00000173812 | 1991.900358 | -0.091912492 | 0.184407803 | -0.498419756 | 0.618188215 | 0.75188641  |
| ENSG00000173818 | 70.01312685 | -0.474294847 | 0.219713456 | -2.158697313 | 0.030873657 | 0.0824491   |
| ENSG00000173821 | 2262.888619 | 0.143610468  | 0.06094705  | 2.356315338  | 0.018457242 | 0.054092376 |
| ENSG00000173846 | 51.45344947 | -0.000290643 | 0.244939508 | -0.00118659  | 0.999053239 | 0.999693749 |
| ENSG00000173848 | 305.7670237 | -0.117683499 | 0.112177918 | -1.049079013 | 0.294141754 | 0.464428366 |
| ENSG00000173852 | 115.9805303 | -0.251239027 | 0.183248073 | -1.371032298 | 0.170364888 | 0.313317044 |
| ENSG00000173875 | 286.5155586 | 0.283166451  | 0.110850212 | 2.554496253  | 0.010634157 | 0.033941834 |
| ENSG00000173889 | 1340.025366 | 0.037358578  | 0.072885806 | 0.51256315   | 0.608256935 | 0.744723395 |
| ENSG00000173894 | 386.4452436 | -0.002081405 | 0.100692916 | -0.020670822 | 0.983508245 | 0.991961125 |
| ENSG00000173898 | 1293.899227 | -0.098540599 | 0.068893168 | -1.430339205 | 0.152619688 | 0.288928404 |
| ENSG00000173905 | 1094.743144 | 0.400243466  | 0.070941004 | 5.641919972  | 1.68E-08    | 2.00E-07    |
| ENSG00000173914 | 69.3594512  | -0.064703417 | 0.212428502 | -0.30458915  | 0.760679085 | 0.855436643 |
| ENSG00000173915 | 1439.613361 | 0.706233652  | 0.091184489 | 7.745107344  | 9.55E-15    | 2.25E-13    |
| ENSG00000173917 | 631.095781  | -0.252373086 | 0.087015765 | -2.900314511 | 0.003727884 | 0.013901138 |
| ENSG00000173918 | 19.55704898 | 0.643292035  | 0.392489016 | 1.639006464  | 0.101211914 | 0.21170349  |
| ENSG00000173928 | 40.42661549 | 0.607889889  | 0.27543913  | 2.206984497  | 0.027315142 | 0.07464899  |
| ENSG00000173933 | 113.7874646 | -0.079129601 | 0.171588252 | -0.461159784 | 0.644683972 | 0.771040933 |
| ENSG00000173947 | 12.13779317 | -1.027541106 | 0.565203051 | -1.818003465 | 0.069063603 | 0.157464118 |
| ENSG00000173950 | 216.1503184 | -0.375801341 | 0.129342034 | -2.905485022 | 0.003666844 | 0.013717219 |
| ENSG00000173960 | 317.5510875 | -0.080411238 | 0.117684242 | -0.68327957  | 0.494430201 | 0.653548606 |
| ENSG00000173992 | 83.43523421 | 0.010345475  | 0.191569071 | 0.054003889  | 0.956932066 | 0.976895279 |
| ENSG00000174004 | 43.19609222 | 0.602400518  | 0.269947616 | 2.231545985  | 0.025644985 | 0.070820507 |
| ENSG00000174007 | 31.37904992 | -0.459103852 | 0.314954285 | -1.457684097 | 0.144927637 | 0.277924713 |
| ENSG00000174010 | 250.2366711 | -0.519191642 | 0.129025137 | -4.023957297 | 5.72E-05    | 0.000346802 |
| ENSG00000174013 | 232.7592594 | 0.255018903  | 0.130186816 | 1.958868892  | 0.050128143 | 0.122099883 |
| ENSG00000174021 | 111.4218269 | -0.172829853 | 0.172817094 | -1.000073832 | 0.317274779 | 0.489001406 |
| ENSG00000174028 | 8.906260499 | 0.620686991  | 0.597146036 | 1.039422443  | 0.298608311 | 0.469182736 |
| ENSG00000174032 | 100.1156896 | -0.623575138 | 0.18056103  | -3.453542216 | 0.000553276 | 0.002650704 |
| ENSG00000174059 | 41.48787186 | -5.242713593 | 0.630681399 | -8.312776634 | 9.35E-17    | 2.55E-15    |
| ENSG00000174080 | 127.1829939 | 0.216780402  | 0.173704821 | 1.247981495  | 0.212037834 | 0.367126273 |
| ENSG00000174099 | 386.225821  | -1.413734886 | 0.107852134 | -13.10808446 | 2.96E-39    | 2.25E-37    |
| ENSG00000174106 | 331.4213161 | -0.789026924 | 0.120789443 | -6.532250689 | 6.48E-11    | 1.06E-09    |
| ENSG00000174109 | 112.0479953 | 0.002524213  | 0.195839551 | 0.012889191  | 0.989716199 | 0.994744093 |
| ENSG00000174130 | 67.00306173 | 3.045814242  | 0.277933152 | 10.95880148  | 6.03E-28    | 3.04E-26    |
| ENSG00000174132 | 95.91392152 | -0.203595114 | 0.205887988 | -0.988863487 | 0.322729937 | 0.494479432 |
| ENSG00000174136 | 175.1785847 | -0.281136677 | 0.139205833 | -2.019575402 | 0.043427449 | 0.109264799 |
| ENSG00000174137 | 16.39556452 | 0.211945936  | 0.432087727 | 0.490515983  | 0.623768822 | 0.755807871 |
| ENSG00000174151 | 27.57793581 | 0.131352126  | 0.344932812 | 0.380804962  | 0.703347977 | 0.814235127 |
| ENSG00000174165 | 88.47305627 | -0.061308755 | 0.192682683 | -0.318185082 | 0.750344548 | 0.84850184  |
| ENSG00000174173 | 272.9939466 | 0.120856291  | 0.113456622 | 1.065220246  | 0.286776274 | 0.45657331  |
| ENSG00000174177 | 36.17974795 | -0.442861621 | 0.287877501 | -1.538368296 | 0.123958589 | 0.248040784 |
| ENSG00000174197 | 1042.863132 | -0.200742361 | 0.072399279 | -2.772712159 | 0.005559127 | 0.019566288 |
| ENSG00000174206 | 51.42690671 | 0.013478975  | 0.241799304 | 0.055744474  | 0.95554537  | 0.97611416  |
| ENSG00000174227 | 170.6584436 | -0.085862862 | 0.145397567 | -0.590538509 | 0.554829676 | 0.701881526 |
| ENSG00000174231 | 8795.942195 | 0.275411525  | 0.052582608 | 5.237692369  | 1.63E-07    | 1.66E-06    |
| ENSG00000174233 | 330.1917678 | -0.009117645 | 0.108245082 | -0.084231493 | 0.932872379 | 0.963270344 |
| ENSG00000174238 | 409.4175563 | -0.275765795 | 0.105949841 | -2.602795737 | 0.009246703 | 0.030227701 |
| ENSG00000174243 | 1362.898393 | -0.001556871 | 0.074804567 | -0.020812509 | 0.983395219 | 0.991939727 |

|                 |             |              |             |              |             |             |
|-----------------|-------------|--------------|-------------|--------------|-------------|-------------|
| ENSG00000174276 | 38.37135812 | 0.761649844  | 0.287295942 | 2.651098508  | 0.008023044 | 0.026826874 |
| ENSG00000174279 | 6.051546192 | -4.878585408 | 1.304400872 | -3.740096709 | 0.000183949 | 0.00099344  |
| ENSG00000174282 | 454.7926638 | -0.010189353 | 0.094076999 | -0.10830865  | 0.913750862 | 0.953578158 |
| ENSG00000174306 | 371.8539805 | 0.026791234  | 0.100367493 | 0.266931387  | 0.789521989 | 0.874348005 |
| ENSG00000174307 | 170.5493831 | -0.072941231 | 0.148802399 | -0.49018854  | 0.62400049  | 0.755922074 |
| ENSG00000174327 | 61.65998864 | -0.257049803 | 0.226976876 | -1.132493353 | 0.257427077 | 0.423279662 |
| ENSG00000174332 | 153.2898854 | -0.177655925 | 0.153873693 | -1.15455684  | 0.24827195  | 0.4126214   |
| ENSG00000174365 | 38.086155   | 0.388127165  | 0.283261034 | 1.370210226  | 0.170621287 | 0.313747509 |
| ENSG00000174371 | 318.8546225 | -0.237933613 | 0.106602101 | -2.231978653 | 0.025616374 | 0.070763659 |
| ENSG00000174373 | 200.3407927 | -0.22709571  | 0.135441205 | -1.676710637 | 0.09359908  | 0.199270426 |
| ENSG00000174405 | 70.38343698 | -0.045246879 | 0.209771088 | -0.215696448 | 0.82922437  | 0.900163426 |
| ENSG00000174437 | 1724.897645 | -0.282494925 | 0.066173695 | -4.268991251 | 1.96E-05    | 0.000132053 |
| ENSG00000174442 | 225.9268527 | 0.029491289  | 0.126437715 | 0.233247565  | 0.815569173 | 0.891619754 |
| ENSG00000174444 | 6928.53777  | 0.116772287  | 0.053594063 | 2.17882878   | 0.02934439  | 0.079026198 |
| ENSG00000174446 | 118.5718978 | -0.109690792 | 0.16532398  | -0.663489905 | 0.507016843 | 0.664185917 |
| ENSG00000174456 | 16.54536054 | -0.312918584 | 0.422497356 | -0.740640338 | 0.458911543 | 0.62242959  |
| ENSG00000174460 | 58.05327339 | 0.344645768  | 0.244981057 | 1.406826197  | 0.159478933 | 0.298195324 |
| ENSG00000174469 | 7.707263827 | 0.276480115  | 0.64605736  | 0.427949796  | 0.668687672 | 0.788272552 |
| ENSG00000174482 | 28.83942756 | -3.308048226 | 0.473105731 | -6.992196481 | 2.71E-12    | 5.14E-11    |
| ENSG00000174483 | 10.92660853 | 0.151405187  | 0.51402654  | 0.294547411  | 0.76833964  | 0.860743833 |
| ENSG00000174485 | 169.0543987 | 0.514382037  | 0.148664045 | 3.460029865  | 0.000540115 | 0.002594734 |
| ENSG00000174498 | 36.36706161 | -0.631171212 | 0.292950212 | -2.154534065 | 0.031198313 | 0.083173792 |
| ENSG00000174501 | 289.1565581 | -0.258258751 | 0.122400459 | -2.109949199 | 0.034862732 | 0.091144015 |
| ENSG00000174514 | 30.03888927 | -0.757208626 | 0.32829535  | -2.306485993 | 0.021083492 | 0.06031768  |
| ENSG00000174516 | 80.93449556 | 0.193525645  | 0.204741755 | 0.945218259  | 0.344547459 | 0.51630661  |
| ENSG00000174529 | 19.9050828  | -0.854457026 | 0.401918656 | -2.125945173 | 0.033507825 | 0.088192696 |
| ENSG00000174547 | 441.0280624 | -0.03682784  | 0.098660328 | -0.373279119 | 0.708940716 | 0.817673446 |
| ENSG00000174564 | 8.265186296 | -0.431805836 | 0.601209693 | -0.718228333 | 0.472616511 | 0.633981332 |
| ENSG00000174574 | 382.9677871 | -0.068585589 | 0.101053854 | -0.67870335  | 0.497325843 | 0.655493567 |
| ENSG00000174579 | 403.4240133 | -0.075722874 | 0.104540499 | -0.724340091 | 0.46885697  | 0.630937837 |
| ENSG00000174586 | 8.85877532  | -0.157941507 | 0.577520295 | -0.273482175 | 0.784482593 | 0.871011269 |
| ENSG00000174606 | 404.0258802 | -0.087813786 | 0.098723432 | -0.889492838 | 0.373738271 | 0.54380583  |
| ENSG00000174628 | 40.46206865 | -0.078769393 | 0.282409243 | -0.278919316 | 0.780306745 | 0.868470711 |
| ENSG00000174652 | 68.67823872 | -0.274850868 | 0.220163957 | -1.248391752 | 0.211887628 | 0.366956665 |
| ENSG00000174669 | 561.5167006 | 0.356368067  | 0.086492345 | 4.120226695  | 3.78E-05    | 0.000239387 |
| ENSG00000174672 | 29.55986618 | -0.972256019 | 0.340032937 | -2.859299536 | 0.004245777 | 0.015571913 |
| ENSG00000174684 | 275.1156142 | 0.381205517  | 0.129940287 | 2.93369766   | 0.003349503 | 0.012699182 |
| ENSG00000174695 | 422.9397195 | -0.11989692  | 0.098757368 | -1.214055437 | 0.224726555 | 0.382809194 |
| ENSG00000174705 | 485.7859801 | -0.506929898 | 0.092906191 | -5.45636294  | 4.86E-08    | 5.39E-07    |
| ENSG00000174718 | 341.3670632 | -0.30670208  | 0.111596891 | -2.748303101 | 0.00599046  | 0.020810514 |
| ENSG00000174720 | 403.3160112 | 0.127546754  | 0.10038384  | 1.270590508  | 0.203874365 | 0.356996162 |
| ENSG00000174721 | 474.0781486 | -0.895466336 | 0.121815807 | -7.350986386 | 1.97E-13    | 4.20E-12    |
| ENSG00000174738 | 91.19613431 | 0.148295929  | 0.185301066 | 0.800297227  | 0.423538609 | 0.590750357 |
| ENSG00000174740 | 20.49702937 | -0.566952502 | 0.387189889 | -1.464275073 | 0.143118805 | 0.275358151 |
| ENSG00000174744 | 157.5398996 | 0.204333085  | 0.151243359 | 1.35102186   | 0.17668843  | 0.321786903 |
| ENSG00000174748 | 3597.881235 | 0.221366894  | 0.063627033 | 3.479132744  | 0.000503039 | 0.002434939 |
| ENSG00000174749 | 8.838360786 | 1.65525657   | 0.647114796 | 2.557902523  | 0.010530561 | 0.033657061 |
| ENSG00000174775 | 109.1336539 | 0.0906504    | 0.17187758  | 0.527412589  | 0.597907103 | 0.736995531 |
| ENSG00000174780 | 1258.73888  | 0.212831279  | 0.080306841 | 2.650226012  | 0.008043794 | 0.026870075 |
| ENSG00000174791 | 529.6687258 | 0.315055889  | 0.105047616 | 2.999172186  | 0.002707143 | 0.01056509  |



|                 |             |              |             |              |             |             |
|-----------------|-------------|--------------|-------------|--------------|-------------|-------------|
| ENSG00000174796 | 113.2586237 | 0.236714823  | 0.168330141 | 1.406253341  | 0.15964891  | 0.298375231 |
| ENSG00000174799 | 187.5870629 | 0.051467912  | 0.138278251 | 0.372205402  | 0.709739925 | 0.818195874 |
| ENSG00000174804 | 72.55583069 | -0.553048366 | 0.20909398  | -2.644975081 | 0.008169693 | 0.027220038 |
| ENSG00000174807 | 391.1989329 | -1.54686665  | 0.10678872  | -14.48530007 | 1.50E-47    | 1.47E-45    |
| ENSG00000174839 | 340.7730359 | -0.195747082 | 0.109635974 | -1.78542749  | 0.074192003 | 0.166083676 |
| ENSG00000174840 | 690.7971133 | 0.446139772  | 0.081172955 | 5.496162776  | 3.88E-08    | 4.38E-07    |
| ENSG00000174842 | 82.02144053 | -0.120779018 | 0.194163675 | -0.622047445 | 0.533910671 | 0.685234734 |
| ENSG00000174851 | 306.3653459 | 0.456736124  | 0.117878359 | 3.874639306  | 0.000106783 | 0.000612236 |
| ENSG00000174871 | 14.64898598 | -0.565520704 | 0.464358537 | -1.217853575 | 0.223279621 | 0.381655725 |
| ENSG00000174886 | 61.72905006 | 0.039117103  | 0.223539818 | 0.17498942   | 0.861087947 | 0.921015943 |
| ENSG00000174891 | 553.4597174 | -0.215815037 | 0.090974056 | -2.372270161 | 0.017679159 | 0.052236112 |
| ENSG00000174903 | 720.6681232 | 0.067986323  | 0.082505562 | 0.824021081  | 0.40992758  | 0.578312013 |
| ENSG00000174915 | 249.6804708 | 0.17872841   | 0.122754062 | 1.455987739  | 0.145396009 | 0.278594699 |
| ENSG00000174917 | 186.4167049 | 0.690508311  | 0.262538304 | 2.630124067  | 0.008535371 | 0.028290788 |
| ENSG00000174928 | 13.78539229 | 0.280767191  | 0.465352906 | 0.603342511  | 0.546280858 | 0.694729455 |
| ENSG00000174938 | 1152.05091  | -0.600375724 | 0.083818236 | -7.162829401 | 7.90E-13    | 1.59E-11    |
| ENSG00000174939 | 511.9687003 | 0.246934372  | 0.120965327 | 2.041364894  | 0.041214571 | 0.104615302 |
| ENSG00000174943 | 497.607612  | 0.106476796  | 0.094417145 | 1.127727348  | 0.259435084 | 0.425585032 |
| ENSG00000174953 | 431.8133085 | -0.073190385 | 0.10043739  | -0.728716524 | 0.466175083 | 0.628864054 |
| ENSG00000174989 | 150.229425  | -0.444177726 | 0.150048286 | -2.96023192  | 0.003074075 | 0.011785354 |
| ENSG00000174996 | 365.2826223 | 0.54652508   | 0.102479859 | 5.332999937  | 9.66E-08    | 1.02E-06    |
| ENSG00000175003 | 13.81041866 | -0.362653848 | 0.483510533 | -0.750043325 | 0.453228612 | 0.617396281 |
| ENSG00000175029 | 565.8491343 | -0.193281547 | 0.092866984 | -2.081272997 | 0.037408925 | 0.096455272 |
| ENSG00000175040 | 71.75331947 | -0.157031061 | 0.20837377  | -0.753602824 | 0.451087748 | 0.616204376 |
| ENSG00000175048 | 57.03984437 | -0.432714035 | 0.238922428 | -1.811106801 | 0.070124321 | 0.159217258 |
| ENSG00000175054 | 373.3944949 | 0.118067469  | 0.106471996 | 1.10890631   | 0.267470602 | 0.43438456  |
| ENSG00000175061 | 1148.298299 | 0.27843386   | 0.085637014 | 3.251326116  | 0.00114868  | 0.00507406  |
| ENSG00000175063 | 419.1364173 | -0.095528524 | 0.102014039 | -0.936425273 | 0.349054271 | 0.521003649 |
| ENSG00000175066 | 199.2737721 | -0.142028369 | 0.133487904 | -1.063979313 | 0.287338071 | 0.457312246 |
| ENSG00000175073 | 393.7953769 | -0.026497685 | 0.101672142 | -0.260618932 | 0.794386389 | 0.877466824 |
| ENSG00000175077 | 14.89298951 | 0.310350113  | 0.442984307 | 0.700589408  | 0.48355929  | 0.644088503 |
| ENSG00000175087 | 43.58484366 | -0.779182457 | 0.274051508 | -2.843197119 | 0.004466344 | 0.016270418 |
| ENSG00000175104 | 121.0641878 | -0.285146204 | 0.165847488 | -1.719327848 | 0.085554692 | 0.186063904 |
| ENSG00000175105 | 90.65688928 | -0.61698285  | 0.189789354 | -3.250882294 | 0.001150475 | 0.00508039  |
| ENSG00000175106 | 50.23638623 | -0.338619593 | 0.2849637   | -1.188290275 | 0.234719068 | 0.395667676 |
| ENSG00000175110 | 287.3647927 | -0.024370358 | 0.111943258 | -0.217702777 | 0.8276607   | 0.898882778 |
| ENSG00000175115 | 544.8914729 | 0.084176306  | 0.097478038 | 0.863541241  | 0.387839955 | 0.556525506 |
| ENSG00000175130 | 781.4925907 | -0.057985421 | 0.08154131  | -0.711117115 | 0.477011665 | 0.637664908 |
| ENSG00000175137 | 132.3080073 | -0.112796577 | 0.155732199 | -0.724298369 | 0.468882578 | 0.630937837 |
| ENSG00000175155 | 73.42398162 | 0.268898337  | 0.21149875  | 1.27139445   | 0.203588356 | 0.356584244 |
| ENSG00000175161 | 8.705095561 | -3.850872486 | 0.953177942 | -4.040035251 | 5.34E-05    | 0.000325973 |
| ENSG00000175166 | 956.3242328 | 0.062036616  | 0.095638151 | 0.648659718  | 0.516558347 | 0.671487608 |
| ENSG00000175175 | 99.5965352  | 0.042247266  | 0.188886732 | 0.223664551  | 0.823018332 | 0.896348169 |
| ENSG00000175182 | 72.03828547 | 0.370834472  | 0.218144859 | 1.699945964  | 0.08914109  | 0.19187326  |
| ENSG00000175183 | 20.961567   | -0.773762769 | 0.387301782 | -1.997829099 | 0.045735191 | 0.113746855 |
| ENSG00000175193 | 11.50965317 | -0.56774336  | 0.54783785  | -1.036334674 | 0.300046035 | 0.470406446 |
| ENSG00000175197 | 121.6849365 | -0.597514857 | 0.17443379  | -3.425453622 | 0.000613774 | 0.002908799 |
| ENSG00000175198 | 130.8986087 | -0.307273874 | 0.175531626 | -1.750532828 | 0.080026415 | 0.176555842 |
| ENSG00000175203 | 410.4652243 | 0.328765899  | 0.097809207 | 3.361298055  | 0.000775771 | 0.003581088 |
| ENSG00000175213 | 79.89105167 | 0.298961731  | 0.211838049 | 1.411274943  | 0.15816356  | 0.296348343 |

|                 |             |              |             |              |             |             |
|-----------------|-------------|--------------|-------------|--------------|-------------|-------------|
| ENSG00000175215 | 1102.212043 | 0.064687707  | 0.074936684 | 0.863231513  | 0.388010191 | 0.556567387 |
| ENSG00000175216 | 2086.645217 | -0.069390791 | 0.066602887 | -1.041858596 | 0.297477242 | 0.468106358 |
| ENSG00000175220 | 400.6933428 | 0.091540238  | 0.10284808  | 0.890052957  | 0.373437451 | 0.54353703  |
| ENSG00000175221 | 276.9628945 | 0.060192271  | 0.112027507 | 0.537299027  | 0.591061077 | 0.731961117 |
| ENSG00000175224 | 267.0612763 | -0.171209188 | 0.119174722 | -1.436623344 | 0.150825047 | 0.286263942 |
| ENSG00000175265 | 239.313673  | 0.199741102  | 0.125504157 | 1.59150985   | 0.11149488  | 0.228304459 |
| ENSG00000175274 | 83.23651865 | -1.616321071 | 0.219870194 | -7.351251386 | 1.96E-13    | 4.20E-12    |
| ENSG00000175283 | 146.4023102 | -0.078994094 | 0.148783895 | -0.530931751 | 0.595466074 | 0.735147824 |
| ENSG00000175287 | 401.742645  | -0.216562155 | 0.114959143 | -1.883818458 | 0.059589536 | 0.139973162 |
| ENSG00000175305 | 50.4395541  | 0.230215537  | 0.257255195 | 0.894891691  | 0.370844989 | 0.541865594 |
| ENSG00000175309 | 241.5342112 | -0.006356352 | 0.131466861 | -0.048349462 | 0.961437736 | 0.979684997 |
| ENSG00000175322 | 100.4611634 | -0.73754668  | 0.182230272 | -4.047333477 | 5.18E-05    | 0.000317217 |
| ENSG00000175324 | 208.3776777 | -0.14499948  | 0.141803999 | -1.022534489 | 0.306527998 | 0.47752037  |
| ENSG00000175334 | 529.9987034 | 0.08830917   | 0.103904555 | 0.849906633  | 0.395376998 | 0.563217718 |
| ENSG00000175344 | 19.68265909 | -0.150828084 | 0.389659322 | -0.387076801 | 0.698699352 | 0.810918182 |
| ENSG00000175348 | 52.90023024 | 0.257067161  | 0.236586447 | 1.086567568  | 0.277227965 | 0.445853623 |
| ENSG00000175352 | 66.15455942 | 0.845031349  | 0.222311121 | 3.801120459  | 0.000144043 | 0.000799571 |
| ENSG00000175354 | 289.5275373 | 0.043792355  | 0.113153072 | 0.387018702  | 0.698742363 | 0.810918182 |
| ENSG00000175376 | 245.9895614 | 0.350942674  | 0.120760832 | 2.906096856  | 0.003659681 | 0.013697721 |
| ENSG00000175387 | 577.8610261 | -0.211840245 | 0.085660505 | -2.473021198 | 0.01339762  | 0.041389803 |
| ENSG00000175390 | 671.755137  | -0.272986707 | 0.081563633 | -3.346916947 | 0.000817157 | 0.003751177 |
| ENSG00000175395 | 155.4209969 | 0.514244445  | 0.148805604 | 3.455813711  | 0.000548634 | 0.002634758 |
| ENSG00000175414 | 302.780096  | 0.392949922  | 0.112683517 | 3.487199667  | 0.000488107 | 0.002368372 |
| ENSG00000175416 | 391.6533672 | 0.645005977  | 0.109878495 | 5.87017484   | 4.35E-09    | 5.58E-08    |
| ENSG00000175455 | 505.5039748 | -0.068708225 | 0.089485902 | -0.767810609 | 0.442599711 | 0.607577494 |
| ENSG00000175467 | 809.2102419 | 0.301355457  | 0.089636832 | 3.361960156  | 0.000773913 | 0.003573687 |
| ENSG00000175470 | 410.8811541 | 0.120404238  | 0.097217753 | 1.238500524  | 0.215530528 | 0.371844427 |
| ENSG00000175471 | 50.10482736 | 2.962940431  | 0.316805157 | 9.352563771  | 8.55E-21    | 3.03E-19    |
| ENSG00000175482 | 10.72917759 | -0.711448239 | 0.561282836 | -1.267539631 | 0.204962402 | 0.35845454  |
| ENSG00000175505 | 28.83322569 | 0.097921873  | 0.323661952 | 0.302543663  | 0.762237654 | 0.856640717 |
| ENSG00000175536 | 15.85802661 | -0.661688659 | 0.455673502 | -1.452111338 | 0.14647065  | 0.280118886 |
| ENSG00000175548 | 44.41238991 | -0.657911994 | 0.263568599 | -2.496169862 | 0.012554247 | 0.039153975 |
| ENSG00000175550 | 1169.672194 | 0.484286671  | 0.078625884 | 6.159379703  | 7.30E-10    | 1.04E-08    |
| ENSG00000175556 | 99.05320052 | 2.052875938  | 0.199051516 | 10.31328963  | 6.14E-25    | 2.73E-23    |
| ENSG00000175564 | 8.968217818 | -0.030140908 | 0.604530018 | -0.049858414 | 0.960235217 | 0.978911684 |
| ENSG00000175567 | 239.2793821 | -0.935868862 | 0.137485214 | -6.807050982 | 9.96E-12    | 1.76E-10    |
| ENSG00000175573 | 63.64952926 | 0.161302911  | 0.224221028 | 0.719392431  | 0.471899159 | 0.633818202 |
| ENSG00000175575 | 153.0564678 | 0.066497385  | 0.147358532 | 0.451262535  | 0.651800344 | 0.776271126 |
| ENSG00000175581 | 269.8795834 | 0.789740099  | 0.130178929 | 6.066573952  | 1.31E-09    | 1.79E-08    |
| ENSG00000175582 | 578.7749849 | 0.659719674  | 0.096144316 | 6.861764674  | 6.80E-12    | 1.22E-10    |
| ENSG00000175591 | 10.09213426 | 1.139575712  | 1.098060309 | 1.037807944  | 0.299359478 | 0.469797808 |
| ENSG00000175592 | 185.9474512 | 0.852776585  | 0.150754241 | 5.656733629  | 1.54E-08    | 1.84E-07    |
| ENSG00000175595 | 182.2393195 | 0.233571242  | 0.136354365 | 1.712972245  | 0.086717646 | 0.187894921 |
| ENSG00000175600 | 82.71447028 | -0.791037897 | 0.200474323 | -3.945831487 | 7.95E-05    | 0.000468372 |
| ENSG00000175602 | 391.8356164 | 0.135960976  | 0.106495275 | 1.276685529  | 0.201713292 | 0.354212163 |
| ENSG00000175606 | 91.59078322 | 0.086559425  | 0.201344744 | 0.429906555  | 0.667263617 | 0.787386763 |
| ENSG00000175611 | 44.97947596 | -0.292147498 | 0.264598085 | -1.10411796  | 0.269541971 | 0.436758112 |
| ENSG00000175634 | 205.9180322 | 0.209223246  | 0.130981326 | 1.597351714  | 0.110187329 | 0.226386049 |
| ENSG00000175643 | 54.29814039 | -0.768185563 | 0.244994626 | -3.13552006  | 0.001715497 | 0.007177194 |
| ENSG00000175662 | 128.2972536 | -0.048183176 | 0.15720424  | -0.306500484 | 0.759223612 | 0.854860493 |

|                 |             |              |              |              |             |             |
|-----------------|-------------|--------------|--------------|--------------|-------------|-------------|
| ENSG00000175691 | 23.73453633 | -0.045818349 | 0.386124387  | -0.118662149 | 0.905543026 | 0.949407589 |
| ENSG00000175711 | 52.71813847 | -0.615495011 | 0.242966429  | -2.533251255 | 0.011300992 | 0.035777559 |
| ENSG00000175727 | 694.3302122 | 0.12044173   | 0.087983142  | 1.368918267  | 0.171024825 | 0.314052555 |
| ENSG00000175745 | 3613.992442 | 0.413711041  | 0.070295196  | 5.885338795  | 3.97E-09    | 5.12E-08    |
| ENSG00000175756 | 758.8030045 | 0.082505893  | 0.097064121  | 0.850014323  | 0.395317123 | 0.563217718 |
| ENSG00000175764 | 51.09670507 | -0.129795818 | 0.242124561  | -0.536070433 | 0.591909874 | 0.732366599 |
| ENSG00000175768 | 401.3155101 | 0.314137717  | 0.116266432  | 2.701878029  | 0.006894905 | 0.023485143 |
| ENSG00000175782 | 112.4436238 | 0.029781167  | 0.180829922  | 0.164691586  | 0.86918674  | 0.927066525 |
| ENSG00000175787 | 32.03113466 | 0.372717845  | 0.303882634  | 1.226519068  | 0.220003404 | 0.377521111 |
| ENSG00000175792 | 790.9430883 | 0.005069475  | 0.077238009  | 0.065634459  | 0.947668854 | 0.970963121 |
| ENSG00000175806 | 81.23536303 | 0.58491119   | 0.202617861  | 2.886770134  | 0.003892185 | 0.014448604 |
| ENSG00000175820 | 8.91705389  | -0.094254696 | 0.58698153   | -0.160575233 | 0.872427963 | 0.929183077 |
| ENSG00000175826 | 626.7163536 | 0.279649202  | 0.085677119  | 3.263989324  | 0.001098553 | 0.004883346 |
| ENSG00000175832 | 772.3413146 | -0.092979404 | 0.080337113  | -1.15736551  | 0.247123059 | 0.4112472   |
| ENSG00000175854 | 43.72756706 | -0.044215614 | 0.282217292  | -0.156672234 | 0.875503171 | 0.931046487 |
| ENSG00000175866 | 374.4231579 | 0.549268942  | 0.108320784  | 5.070762274  | 3.96E-07    | 3.81E-06    |
| ENSG00000175893 | 160.4178391 | 0.151097768  | 0.144107483  | 1.048507441  | 0.294404876 | 0.464663516 |
| ENSG00000175895 | 68.78009327 | 0.586109385  | 0.214300758  | 2.734985124  | 0.00623831  | 0.02154648  |
| ENSG00000175906 | 10.91924538 | -0.602182672 | 0.538648355  | -1.117951381 | 0.263587759 | 0.430136762 |
| ENSG00000175931 | 850.018837  | 0.067401836  | 0.075514416  | 0.892569123  | 0.37208796  | 0.542757597 |
| ENSG00000175938 | 38.621648   | -0.84437866  | 0.286287227  | -2.949410876 | 0.003183804 | 0.01215296  |
| ENSG00000175970 | 214.0999767 | -0.12991154  | 0.129355081  | -1.004301795 | 0.315233169 | 0.486655712 |
| ENSG00000175984 | 52.68498834 | -0.000398606 | 0.242277566  | -0.001645246 | 0.998687284 | 0.999398752 |
| ENSG00000176014 | 851.7430958 | 0.213663539  | 0.074997454  | 2.848943922  | 0.004386461 | 0.016028081 |
| ENSG00000176018 | 87.15825531 | -0.010011831 | 0.189545911  | -0.052820083 | 0.95787526  | 0.977427995 |
| ENSG00000176022 | 128.1911678 | 0.163776699  | 0.159536454  | 1.026578532  | 0.304618967 | 0.475495347 |
| ENSG00000176024 | 11.77951136 | 0.919433236  | 0.535928989  | 1.715587802  | 0.086237513 | 0.187143263 |
| ENSG00000176043 | 31.25357577 | 0.262281801  | 0.332717699  | 0.788301319  | 0.430520476 | 0.597227052 |
| ENSG00000176046 | 9.13662738  | -0.225587903 | 0.570089489  | -0.395706126 | 0.692321836 | 0.806274442 |
| ENSG00000176055 | 142.1287691 | -0.088626109 | 0.160466579  | -0.552302605 | 0.580741046 | 0.723518357 |
| ENSG00000176058 | 88.57989508 | 0.020640661  | 0.208479099  | 0.099005902  | 0.921133584 | 0.956727767 |
| ENSG00000176087 | 492.7348904 | 0.2320952    | 0.090628221  | 2.560959456  | 0.010438354 | 0.033461332 |
| ENSG00000176092 | 14.76917683 | -0.205365626 | 0.458642725  | -0.447768196 | 0.654320498 | 0.778193213 |
| ENSG00000176095 | 456.6156025 | 0.235188772  | 0.10593098   | 2.22020765   | 0.026404675 | 0.072598644 |
| ENSG00000176101 | 162.4498564 | 0.423174743  | 0.150058675  | 2.820061831  | 0.00480144  | 0.017293801 |
| ENSG00000176102 | 463.8518972 | -0.087264057 | 0.095660438  | -0.912227231 | 0.361649112 | 0.532503677 |
| ENSG00000176105 | 1146.986344 | -0.400933706 | 0.071846733  | -5.580402721 | 2.40E-08    | 2.79E-07    |
| ENSG00000176108 | 106.5691847 | 0.080811071  | 0.174761573  | 0.462407547  | 0.643789088 | 0.770232972 |
| ENSG00000176124 | 14.01547206 | -0.47729954  | 0.471833153  | -1.011585424 | 0.311736318 | 0.483222254 |
| ENSG00000176125 | 13.35765029 | -0.035036954 | 0.527158418  | -0.066463804 | 0.947008575 | 0.970640602 |
| ENSG00000176142 | 230.8476462 | 0.160172362  | 0.121376038  | 1.319637421  | 0.186956103 | 0.335227518 |
| ENSG00000176148 | 145.0681901 | 0.072719519  | 0.153988135  | 0.472241055  | 0.636754739 | 0.76559906  |
| ENSG00000176155 | 668.3242278 | -0.100776184 | 0.101603284  | -0.991859514 | 0.321266061 | 0.492989334 |
| ENSG00000176170 | 373.856237  | 0.795768441  | 0.110351114  | 7.211240688  | 5.54E-13    | 1.13E-11    |
| ENSG00000176171 | 573.3995064 | 0.956799583  | 0.094642172  | 10.10965366  | 5.01E-24    | 2.09E-22    |
| ENSG00000176182 | 178.8368893 | 0.289200356  | 0.147006262  | 1.967265553  | 0.049152604 | 0.120286869 |
| ENSG00000176204 | 16.81522523 | -6.364551517 | 1.226090431  | -5.190931562 | 2.09E-07    | 2.10E-06    |
| ENSG00000176208 | 292.8277077 | -0.483327682 | 0.1111113734 | -4.349846446 | 1.36E-05    | 9.50E-05    |
| ENSG00000176209 | 55.38867264 | -0.208938066 | 0.242121921  | -0.862945681 | 0.388167333 | 0.556670396 |
| ENSG00000176225 | 193.1384899 | -0.715183417 | 0.138373359  | -5.168505143 | 2.36E-07    | 2.35E-06    |

|                 |             |              |             |              |             |             |
|-----------------|-------------|--------------|-------------|--------------|-------------|-------------|
| ENSG00000176244 | 58.92300285 | -1.127832578 | 0.244371816 | -4.615231814 | 3.93E-06    | 3.08E-05    |
| ENSG00000176248 | 90.84204186 | 0.015330242  | 0.188410464 | 0.081366189  | 0.935150737 | 0.96468109  |
| ENSG00000176261 | 327.3104206 | 0.584266363  | 0.113626167 | 5.142005395  | 2.72E-07    | 2.67E-06    |
| ENSG00000176273 | 109.317161  | 0.076075253  | 0.170601036 | 0.44592492   | 0.655651481 | 0.779180728 |
| ENSG00000176340 | 167.2589445 | -0.064698687 | 0.142063502 | -0.455420894 | 0.648806466 | 0.773893979 |
| ENSG00000176371 | 59.79890593 | 0.047749297  | 0.229780721 | 0.207803756  | 0.8353822   | 0.903705334 |
| ENSG00000176383 | 9.295804981 | 0.283377945  | 0.560451316 | 0.50562455   | 0.613120244 | 0.748392428 |
| ENSG00000176386 | 90.11892627 | 0.366985464  | 0.19204704  | 1.91091445   | 0.056015576 | 0.133341941 |
| ENSG00000176387 | 17.71675055 | 0.244733303  | 0.414349365 | 0.590644813  | 0.554758432 | 0.701854606 |
| ENSG00000176390 | 95.21025601 | 0.249777744  | 0.181597457 | 1.375447363  | 0.168992794 | 0.311407528 |
| ENSG00000176393 | 598.9048122 | 0.053927459  | 0.084135414 | 0.640960286  | 0.521548486 | 0.675847931 |
| ENSG00000176396 | 70.29128079 | -0.532539189 | 0.213894764 | -2.489725221 | 0.012784189 | 0.039773977 |
| ENSG00000176401 | 14.79705321 | -0.144155325 | 0.454837813 | -0.316937864 | 0.751290751 | 0.8494267   |
| ENSG00000176406 | 265.5074846 | -0.456584989 | 0.12124113  | -3.765924885 | 0.000165934 | 0.000905342 |
| ENSG00000176407 | 361.349132  | 0.005632713  | 0.104909229 | 0.053691303  | 0.957181112 | 0.977003566 |
| ENSG00000176410 | 82.56113838 | -0.017379669 | 0.202895997 | -0.085658019 | 0.931738275 | 0.96307046  |
| ENSG00000176422 | 92.39203376 | 0.236983303  | 0.195318784 | 1.213315477  | 0.225009228 | 0.383162156 |
| ENSG00000176428 | 12.92681042 | 0.179521477  | 0.491176869 | 0.365492531  | 0.714743781 | 0.822277305 |
| ENSG00000176438 | 31.70610592 | -0.381704594 | 0.317355552 | -1.202766396 | 0.229066732 | 0.387861666 |
| ENSG00000176444 | 726.5426734 | 0.164213186  | 0.079585304 | 2.063360657  | 0.039078375 | 0.099961736 |
| ENSG00000176454 | 243.6432118 | 0.161967075  | 0.123950672 | 1.306705906  | 0.191312612 | 0.341469919 |
| ENSG00000176472 | 29.93264369 | 1.295959935  | 0.338294253 | 3.83086595   | 0.000127693 | 0.000718344 |
| ENSG00000176473 | 23.53924192 | -1.414909267 | 0.387898355 | -3.647628942 | 0.000264671 | 0.001373925 |
| ENSG00000176476 | 62.2649418  | -0.103649235 | 0.222849593 | -0.465108479 | 0.641853775 | 0.768834312 |
| ENSG00000176485 | 89.96543238 | 0.006122873  | 0.204822814 | 0.029893509  | 0.976151982 | 0.987958767 |
| ENSG00000176490 | 171.0439466 | 0.772089092  | 0.149201092 | 5.174822007  | 2.28E-07    | 2.27E-06    |
| ENSG00000176531 | 127.7792885 | 0.338387899  | 0.172541484 | 1.961197338  | 0.049856007 | 0.121584607 |
| ENSG00000176533 | 19.15790697 | -1.082470951 | 0.430109526 | -2.516733264 | 0.011844846 | 0.037222496 |
| ENSG00000176542 | 1052.979285 | -0.051703627 | 0.08507775  | -0.607722076 | 0.543371819 | 0.692312375 |
| ENSG00000176571 | 10.62434378 | -6.689122008 | 1.252477214 | -5.340713533 | 9.26E-08    | 9.81E-07    |
| ENSG00000176593 | 30.77305071 | 0.380799751  | 0.340922542 | 1.11696853   | 0.264007781 | 0.430572077 |
| ENSG00000176595 | 29.97462534 | 1.201792222  | 0.338513471 | 3.550205017  | 0.000384931 | 0.001919464 |
| ENSG00000176597 | 42.34278232 | 0.507391619  | 0.287885777 | 1.762475465  | 0.077988998 | 0.173148642 |
| ENSG00000176619 | 2078.586281 | 0.259867816  | 0.079036308 | 3.287954916  | 0.00100918  | 0.004531954 |
| ENSG00000176623 | 181.6031236 | 0.186886269  | 0.135587843 | 1.378340896  | 0.168098062 | 0.310367177 |
| ENSG00000176624 | 362.6292443 | 0.090186794  | 0.10225844  | 0.881949641  | 0.377804041 | 0.547235502 |
| ENSG00000176714 | 60.8429063  | -0.440183742 | 0.223793755 | -1.966917    | 0.04919278  | 0.120322303 |
| ENSG00000176715 | 213.1364042 | -1.441168387 | 0.139102253 | -10.36049638 | 3.75E-25    | 1.69E-23    |
| ENSG00000176720 | 129.3896927 | 0.153655989  | 0.167615641 | 0.916716298  | 0.359291324 | 0.530567328 |
| ENSG00000176723 | 7.997288098 | -1.719178241 | 0.706388545 | -2.433757249 | 0.014943013 | 0.045374946 |
| ENSG00000176731 | 349.879044  | 0.412036005  | 0.112640812 | 3.657963733  | 0.000254227 | 0.001326078 |
| ENSG00000176749 | 37.97456045 | -0.151036576 | 0.279300495 | -0.540767307 | 0.58866798  | 0.730091746 |
| ENSG00000176783 | 181.8011042 | 0.045171747  | 0.146025866 | 0.309340721  | 0.757062358 | 0.853213651 |
| ENSG00000176788 | 37.43045625 | 2.637938264  | 0.343456149 | 7.680567863  | 1.58E-14    | 3.69E-13    |
| ENSG00000176809 | 42.96208159 | -0.246391896 | 0.291923046 | -0.8440303   | 0.398652474 | 0.566731232 |
| ENSG00000176834 | 148.9819955 | -0.143271212 | 0.150032544 | -0.954934231 | 0.339610957 | 0.511418859 |
| ENSG00000176840 | 75.95164835 | -0.29554962  | 0.219310153 | -1.347633092 | 0.177776421 | 0.323295139 |
| ENSG00000176845 | 56.69451865 | 1.127159542  | 0.250953412 | 4.49150913   | 7.07E-06    | 5.25E-05    |
| ENSG00000176853 | 406.7664133 | 0.092205347  | 0.108005828 | 0.853707146  | 0.393267274 | 0.561290936 |
| ENSG00000176871 | 319.3461898 | -0.095560659 | 0.108468059 | -0.881002755 | 0.378316329 | 0.547630819 |

|                 |             |              |             |              |             |             |
|-----------------|-------------|--------------|-------------|--------------|-------------|-------------|
| ENSG00000176884 | 40.10718891 | -1.020613652 | 0.2834183   | -3.601085923 | 0.000316891 | 0.001613398 |
| ENSG00000176890 | 1156.145752 | 0.117726014  | 0.068493238 | 1.718797598  | 0.085651233 | 0.18614828  |
| ENSG00000176894 | 12.41738834 | -0.432814987 | 0.505300713 | -0.856549329 | 0.391694    | 0.56006979  |
| ENSG00000176903 | 771.4944438 | 0.01987092   | 0.083677273 | 0.237470937  | 0.812291463 | 0.889524775 |
| ENSG00000176907 | 53.35968882 | -9.017917239 | 1.194045195 | -7.552408634 | 4.27E-14    | 9.74E-13    |
| ENSG00000176909 | 119.7396496 | 0.136841313  | 0.187654598 | 0.729219076  | 0.465867664 | 0.628509708 |
| ENSG00000176912 | 33.06173876 | -0.65404081  | 0.306011086 | -2.137310836 | 0.032572718 | 0.086102554 |
| ENSG00000176915 | 635.5394434 | 0.010530227  | 0.093273238 | 0.112896557  | 0.910112566 | 0.951381168 |
| ENSG00000176919 | 9.777221089 | 0.365775237  | 0.562408692 | 0.65037266   | 0.515451533 | 0.671096242 |
| ENSG00000176945 | 17.24122717 | -1.401866734 | 0.467104119 | -3.001186835 | 0.002689295 | 0.010510998 |
| ENSG00000176946 | 543.2143576 | 0.360436646  | 0.097519665 | 3.696040668  | 0.000218988 | 0.001160363 |
| ENSG00000176953 | 391.8379039 | 0.233049835  | 0.113022653 | 2.061974554  | 0.039210159 | 0.100160956 |
| ENSG00000176971 | 12.77178597 | 2.933944036  | 0.609830021 | 4.811084951  | 1.50E-06    | 1.28E-05    |
| ENSG00000176973 | 59.23046982 | -0.695489742 | 0.2488711   | -2.794578171 | 0.005196748 | 0.018494733 |
| ENSG00000176974 | 211.8837112 | -0.497800377 | 0.138030397 | -3.60645471  | 0.000310409 | 0.001584993 |
| ENSG00000176978 | 187.9087616 | 0.299735376  | 0.136742931 | 2.191962491  | 0.028382215 | 0.077025691 |
| ENSG00000176986 | 562.9736116 | 0.212505066  | 0.088140162 | 2.410990188  | 0.015909276 | 0.047894901 |
| ENSG00000176994 | 588.7716903 | -0.015937363 | 0.086568982 | -0.184100155 | 0.853934885 | 0.91622543  |
| ENSG00000177000 | 320.334854  | 0.113409757  | 0.109821138 | 1.032676937  | 0.30175511  | 0.47217935  |
| ENSG00000177030 | 347.0194975 | 0.478959365  | 0.108049414 | 4.432780786  | 9.30E-06    | 6.70E-05    |
| ENSG00000177034 | 291.2265254 | -0.18188582  | 0.113979346 | -1.595778761 | 0.110538197 | 0.226791078 |
| ENSG00000177042 | 127.8333239 | 0.483876487  | 0.163378322 | 2.961693326  | 0.003059524 | 0.011742384 |
| ENSG00000177045 | 327.3352804 | 0.021425501  | 0.111425545 | 0.192285363  | 0.847518683 | 0.912267812 |
| ENSG00000177051 | 226.0590039 | 0.023964737  | 0.133385467 | 0.179665281  | 0.857415352 | 0.918346431 |
| ENSG00000177054 | 23.72639844 | -0.455092643 | 0.356730175 | -1.275733523 | 0.202049734 | 0.354594883 |
| ENSG00000177058 | 52.49137156 | -0.029537157 | 0.248646997 | -0.11879153  | 0.90544052  | 0.949370977 |
| ENSG00000177076 | 23.50644747 | -0.564697551 | 0.359606517 | -1.570320682 | 0.116340525 | 0.235786373 |
| ENSG00000177082 | 285.8337135 | 0.034096699  | 0.114459982 | 0.297891876  | 0.765785689 | 0.858773078 |
| ENSG00000177084 | 1095.433185 | -0.138749525 | 0.072617617 | -1.910686843 | 0.056044837 | 0.133366393 |
| ENSG00000177098 | 9.715669434 | -0.485814813 | 0.565308917 | -0.859379357 | 0.390131255 | 0.558517503 |
| ENSG00000177105 | 140.5231156 | 0.453256555  | 0.156559977 | 2.895098492  | 0.003790396 | 0.014115506 |
| ENSG00000177106 | 193.1967945 | 1.739587619  | 0.146598122 | 11.86637042  | 1.77E-32    | 1.05E-30    |
| ENSG00000177119 | 552.1939468 | -0.053618233 | 0.08993228  | -0.596206759 | 0.551037111 | 0.698621617 |
| ENSG00000177125 | 143.3383954 | -0.808302473 | 0.163580137 | -4.941324084 | 7.76E-07    | 7.05E-06    |
| ENSG00000177150 | 144.4424985 | 0.14174705   | 0.148261857 | 0.956058776  | 0.33904254  | 0.511001134 |
| ENSG00000177156 | 763.0870137 | 0.428281325  | 0.08558247  | 5.004311339  | 5.61E-07    | 5.25E-06    |
| ENSG00000177169 | 319.8260705 | 0.108519015  | 0.113451047 | 0.956527227  | 0.338805936 | 0.510699322 |
| ENSG00000177181 | 29.24256007 | 0.49440936   | 0.320786976 | 1.541238884  | 0.123258657 | 0.247062551 |
| ENSG00000177189 | 384.8994112 | 0.226837057  | 0.100995418 | 2.246013356  | 0.024703152 | 0.068591655 |
| ENSG00000177192 | 321.2315579 | 0.424928296  | 0.112784144 | 3.76762443   | 0.000164808 | 0.000899753 |
| ENSG00000177200 | 1058.602525 | -0.102842392 | 0.071378718 | -1.440799101 | 0.149641448 | 0.284555762 |
| ENSG00000177225 | 251.7260754 | 0.447771488  | 0.128966827 | 3.471989659  | 0.000516616 | 0.002492926 |
| ENSG00000177239 | 270.3353777 | 0.386289817  | 0.113569836 | 3.401341691  | 0.00067056  | 0.003145025 |
| ENSG00000177283 | 47.71797655 | -5.224333962 | 0.589225168 | -8.8664474   | 7.55E-19    | 2.42E-17    |
| ENSG00000177302 | 344.0402441 | 0.035111564  | 0.104025306 | 0.337529059  | 0.73571811  | 0.83739245  |
| ENSG00000177303 | 206.2268754 | -0.321459181 | 0.130770366 | -2.458195926 | 0.013963697 | 0.042780382 |
| ENSG00000177311 | 396.0927907 | 0.253216689  | 0.101708266 | 2.48963727   | 0.012787353 | 0.03977501  |
| ENSG00000177335 | 48.89813204 | 0.180619718  | 0.251145779 | 0.719182773  | 0.472028312 | 0.633818202 |
| ENSG00000177337 | 49.45127839 | -0.128259223 | 0.264522343 | -0.484871038 | 0.627767828 | 0.758494295 |
| ENSG00000177352 | 252.8511053 | 0.001109139  | 0.121779538 | 0.00910776   | 0.992733159 | 0.996284349 |

|                 |             |              |             |              |             |             |
|-----------------|-------------|--------------|-------------|--------------|-------------|-------------|
| ENSG00000177370 | 353.6010822 | 0.197131007  | 0.11122548  | 1.772354744  | 0.076335689 | 0.170015447 |
| ENSG00000177374 | 359.6447956 | 0.165889862  | 0.117044548 | 1.417322423  | 0.156388682 | 0.29404254  |
| ENSG00000177380 | 239.1196314 | 0.029283847  | 0.122029823 | 0.239972873  | 0.810351286 | 0.888256303 |
| ENSG00000177383 | 190.0948068 | -0.50560106  | 0.138493012 | -3.65073338  | 0.000261493 | 0.001359432 |
| ENSG00000177410 | 276.0592794 | 0.124816724  | 0.121387573 | 1.028249604  | 0.30383243  | 0.474638867 |
| ENSG00000177425 | 325.9307528 | -0.67754086  | 0.10682241  | -6.342684662 | 2.26E-10    | 3.42E-09    |
| ENSG00000177426 | 164.2577163 | 0.017026338  | 0.145506424 | 0.117014337  | 0.906848692 | 0.950209129 |
| ENSG00000177427 | 33.67146289 | -0.008188848 | 0.296026058 | -0.027662591 | 0.97793126  | 0.988629033 |
| ENSG00000177432 | 44.45683513 | 1.235488084  | 0.277044994 | 4.459521421  | 8.21E-06    | 6.00E-05    |
| ENSG00000177463 | 604.2143645 | 0.185470732  | 0.088475844 | 2.096286669  | 0.036056769 | 0.093707572 |
| ENSG00000177469 | 608.3583924 | -0.497357896 | 0.08589391  | -5.790374405 | 7.02E-09    | 8.84E-08    |
| ENSG00000177479 | 1199.17298  | 0.024761479  | 0.071562059 | 0.34601406   | 0.729332148 | 0.832773591 |
| ENSG00000177485 | 352.9668376 | 0.37717452   | 0.116091562 | 3.248939995  | 0.001158359 | 0.005103974 |
| ENSG00000177542 | 251.72216   | 0.172675373  | 0.125055995 | 1.380784445  | 0.167345248 | 0.309465336 |
| ENSG00000177548 | 135.262958  | 0.449337463  | 0.155470527 | 2.890177789  | 0.00385024  | 0.014315596 |
| ENSG00000177556 | 197.2027913 | 0.408117851  | 0.146236963 | 2.79079818   | 0.005257825 | 0.018678974 |
| ENSG00000177565 | 631.9088529 | -0.107718084 | 0.085403528 | -1.261283766 | 0.207206628 | 0.361165344 |
| ENSG00000177576 | 15.10810501 | 0.149376874  | 0.4598846   | 0.32481382   | 0.745321984 | 0.844658162 |
| ENSG00000177595 | 206.4448591 | -0.00240619  | 0.138439708 | -0.017380782 | 0.986132841 | 0.992634039 |
| ENSG00000177600 | 5172.543972 | 0.378090187  | 0.060024601 | 6.298920475  | 3.00E-10    | 4.46E-09    |
| ENSG00000177602 | 136.0566054 | -0.133467978 | 0.155365509 | -0.859057964 | 0.390308537 | 0.558600512 |
| ENSG00000177606 | 10.66204261 | 0.149351185  | 0.528717799 | 0.282478073  | 0.777576957 | 0.866874883 |
| ENSG00000177613 | 242.3502873 | -0.24493922  | 0.123185475 | -1.988377448 | 0.046769961 | 0.115787389 |
| ENSG00000177628 | 285.6428445 | 0.35386692   | 0.114453236 | 3.091803547  | 0.001989445 | 0.008135583 |
| ENSG00000177640 | 18.56656992 | -1.216627683 | 0.42428971  | -2.867445646 | 0.004137999 | 0.015260296 |
| ENSG00000177646 | 439.9374956 | 0.035919088  | 0.096175963 | 0.373472612  | 0.708796725 | 0.817578223 |
| ENSG00000177663 | 281.4242941 | -0.001568398 | 0.128777538 | -0.012179128 | 0.990282702 | 0.994957522 |
| ENSG00000177666 | 624.4144609 | 0.096043249  | 0.097883483 | 0.98119975   | 0.326494247 | 0.498669641 |
| ENSG00000177674 | 199.7824809 | -0.019293144 | 0.131660629 | -0.146536925 | 0.883497543 | 0.93565214  |
| ENSG00000177679 | 35.48115265 | 0.038517811  | 0.295777691 | 0.130225546  | 0.896387984 | 0.943824452 |
| ENSG00000177683 | 181.1698551 | 0.714059145  | 0.143672568 | 4.970045109  | 6.69E-07    | 6.17E-06    |
| ENSG00000177685 | 342.9445674 | 0.049715993  | 0.107015226 | 0.464569346  | 0.642239888 | 0.768968949 |
| ENSG00000177688 | 8.989427497 | -0.725645591 | 0.577923972 | -1.255607358 | 0.209258362 | 0.363973776 |
| ENSG00000177697 | 376.2094788 | 0.747101909  | 0.132495089 | 5.638713971  | 1.71E-08    | 2.03E-07    |
| ENSG00000177700 | 1446.88331  | 0.059895303  | 0.070501956 | 0.849555201  | 0.395572428 | 0.563436006 |
| ENSG00000177706 | 177.8110803 | 0.060777465  | 0.136491777 | 0.445282981  | 0.656115265 | 0.779535747 |
| ENSG00000177707 | 13.9276758  | -0.968513971 | 0.48134334  | -2.012106308 | 0.044208732 | 0.110714933 |
| ENSG00000177721 | 42.95864155 | -0.361367277 | 0.2655536   | -1.360807301 | 0.173574594 | 0.317515604 |
| ENSG00000177728 | 832.4127201 | -0.177102068 | 0.082834367 | -2.138026444 | 0.032514597 | 0.085981277 |
| ENSG00000177731 | 742.0851292 | -0.0118696   | 0.081922852 | -0.144887538 | 0.884799666 | 0.936819244 |
| ENSG00000177732 | 616.9172089 | -0.06539083  | 0.087064915 | -0.751058341 | 0.452617546 | 0.617273657 |
| ENSG00000177733 | 778.8185882 | -0.050074673 | 0.193694406 | -0.258524108 | 0.796002446 | 0.878339214 |
| ENSG00000177738 | 88.59717528 | -0.493102831 | 0.194166505 | -2.53958751  | 0.011098328 | 0.035239197 |
| ENSG00000177788 | 79.83152435 | 0.056359891  | 0.207159111 | 0.272060885  | 0.785575204 | 0.871640987 |
| ENSG00000177830 | 363.4113242 | 0.552487579  | 0.10588222  | 5.217944781  | 1.81E-07    | 1.83E-06    |
| ENSG00000177842 | 39.85114885 | -0.762708624 | 0.278264233 | -2.740950987 | 0.006126165 | 0.021221759 |
| ENSG00000177853 | 347.9058532 | -0.764030666 | 0.108461833 | -7.044235213 | 1.86E-12    | 3.63E-11    |
| ENSG00000177854 | 13.02598853 | 0.310790427  | 0.493499734 | 0.629768174  | 0.528846271 | 0.681469917 |
| ENSG00000177855 | 8.133479861 | -0.133173351 | 0.595408419 | -0.223667229 | 0.823016247 | 0.896348169 |
| ENSG00000177868 | 49.72546831 | -1.264053265 | 0.262348989 | -4.818212832 | 1.45E-06    | 1.24E-05    |

|                 |             |              |             |              |             |             |
|-----------------|-------------|--------------|-------------|--------------|-------------|-------------|
| ENSG00000177873 | 44.36587891 | -0.310067508 | 0.268220781 | -1.156015976 | 0.247674622 | 0.411921077 |
| ENSG00000177875 | 25.13707411 | 0.334811552  | 0.345132977 | 0.970094351  | 0.331999464 | 0.504440134 |
| ENSG00000177879 | 253.5850417 | 0.172673584  | 0.116731722 | 1.479234438  | 0.139077668 | 0.269667102 |
| ENSG00000177885 | 1155.306467 | 0.069816225  | 0.071660481 | 0.974263974  | 0.329925487 | 0.502255933 |
| ENSG00000177888 | 326.2193677 | -0.284620315 | 0.10682032  | -2.664477265 | 0.007710808 | 0.025924777 |
| ENSG00000177889 | 355.5510045 | -0.116688439 | 0.105999158 | -1.100843083 | 0.270964957 | 0.438557985 |
| ENSG00000177917 | 176.0709605 | -0.364046661 | 0.141332543 | -2.575816254 | 0.010000377 | 0.032297953 |
| ENSG00000177943 | 44.8057964  | 0.190249191  | 0.274192597 | 0.693852399  | 0.487774778 | 0.647887711 |
| ENSG00000177946 | 42.25232753 | 0.228259691  | 0.268750047 | 0.849338237  | 0.39569311  | 0.563477628 |
| ENSG00000177951 | 257.8693559 | 0.170360507  | 0.119735163 | 1.422811002  | 0.154790951 | 0.292054868 |
| ENSG00000177954 | 323.4579348 | 0.213018204  | 0.124542626 | 1.710403984  | 0.087191195 | 0.188571935 |
| ENSG00000177963 | 331.0527704 | 0.241614308  | 0.109300026 | 2.2105604    | 0.027066294 | 0.07409866  |
| ENSG00000177971 | 267.3986013 | 0.024734137  | 0.11634326  | 0.212596218  | 0.831641921 | 0.901477895 |
| ENSG00000177981 | 68.46288692 | 0.468379208  | 0.217449318 | 2.153969542  | 0.031242561 | 0.08322857  |
| ENSG00000177990 | 108.3067386 | 0.386813949  | 0.188304872 | 2.054189802  | 0.039957325 | 0.101754994 |
| ENSG00000178026 | 76.28858057 | 0.114440087  | 0.210235643 | 0.544341984  | 0.586206161 | 0.728067015 |
| ENSG00000178028 | 153.3182384 | 0.21088029   | 0.146398429 | 1.440454598  | 0.149738826 | 0.284663864 |
| ENSG00000178033 | 31.02920329 | -5.081448845 | 0.697368    | -7.286610289 | 3.18E-13    | 6.63E-12    |
| ENSG00000178035 | 32.99246283 | 0.119398486  | 0.314149695 | 0.380068764  | 0.703894372 | 0.814364144 |
| ENSG00000178038 | 29.39945378 | -0.783181642 | 0.33817106  | -2.315933371 | 0.020561907 | 0.059126532 |
| ENSG00000178053 | 189.4333532 | 0.65634417   | 0.132286405 | 4.961539082  | 6.99E-07    | 6.41E-06    |
| ENSG00000178057 | 2130.776561 | 0.362590404  | 0.079581426 | 4.556218979  | 5.21E-06    | 3.98E-05    |
| ENSG00000178074 | 171.1381193 | -0.003273262 | 0.14491871  | -0.022586883 | 0.981979807 | 0.990867779 |
| ENSG00000178075 | 20.51619942 | 0.483143705  | 0.38641503  | 1.250323273  | 0.21118148  | 0.366275621 |
| ENSG00000178078 | 41.62922548 | 0.647275575  | 0.277489469 | 2.332613119  | 0.01966846  | 0.057022202 |
| ENSG00000178093 | 11.70060646 | -0.088489443 | 0.501691285 | -0.17638226  | 0.859993641 | 0.920195816 |
| ENSG00000178096 | 79.57623935 | 0.402350556  | 0.204724323 | 1.965328548  | 0.049376223 | 0.120665938 |
| ENSG00000178104 | 156.6865427 | 0.090573704  | 0.14421477  | 0.628047351  | 0.529972921 | 0.682240213 |
| ENSG00000178105 | 725.0073762 | -1.040494389 | 0.082115375 | -12.67112758 | 8.55E-37    | 5.91E-35    |
| ENSG00000178127 | 39.16522428 | -0.118339022 | 0.283980727 | -0.416714979 | 0.676886897 | 0.794803163 |
| ENSG00000178149 | 92.45628072 | 0.054245306  | 0.195396612 | 0.277616412  | 0.781306832 | 0.868895343 |
| ENSG00000178150 | 136.2395498 | 0.12746509   | 0.166158029 | 0.767131696  | 0.443003218 | 0.607879868 |
| ENSG00000178163 | 259.6910972 | -0.201735668 | 0.126372972 | -1.596351382 | 0.110410364 | 0.226645729 |
| ENSG00000178177 | 259.513941  | -0.189478885 | 0.117465033 | -1.613066285 | 0.106730108 | 0.220746286 |
| ENSG00000178184 | 37.5239994  | -0.045441281 | 0.295768755 | -0.153637867 | 0.877895278 | 0.932742982 |
| ENSG00000178188 | 253.7975129 | 0.015157152  | 0.12638589  | 0.119927568  | 0.904540526 | 0.94878142  |
| ENSG00000178202 | 785.029584  | 0.03937423   | 0.081594758 | 0.48255833   | 0.629409372 | 0.759693543 |
| ENSG00000178209 | 4975.216123 | 0.161895689  | 0.082227411 | 1.968877369  | 0.048967175 | 0.119979401 |
| ENSG00000178229 | 78.40791737 | 0.24847287   | 0.19774604  | 1.25652514   | 0.208925637 | 0.363485066 |
| ENSG00000178234 | 313.6642161 | 0.346210472  | 0.112362864 | 3.081182344  | 0.002061803 | 0.008375406 |
| ENSG00000178235 | 6.332109092 | -2.06029936  | 0.821159592 | -2.509012108 | 0.012106933 | 0.037944242 |
| ENSG00000178252 | 1545.889648 | -0.097971967 | 0.066558036 | -1.47197803  | 0.14102681  | 0.272302901 |
| ENSG00000178295 | 350.8563909 | -0.159585986 | 0.107333408 | -1.486824918 | 0.137061059 | 0.266735479 |
| ENSG00000178307 | 237.0532465 | 0.04725182   | 0.120509073 | 0.392101763  | 0.694983025 | 0.808537739 |
| ENSG00000178338 | 118.3785454 | 0.150752966  | 0.164675275 | 0.915455981  | 0.359952301 | 0.531230298 |
| ENSG00000178343 | 10.92995859 | 0.63158345   | 0.515062249 | 1.226227414  | 0.220113108 | 0.377663225 |
| ENSG00000178381 | 33.72249311 | 0.304663789  | 0.308558627 | 0.987377316  | 0.3234577   | 0.495216383 |
| ENSG00000178385 | 114.3427921 | 0.078694766  | 0.167056409 | 0.471067024  | 0.637592873 | 0.76614774  |
| ENSG00000178394 | 7.208321976 | -6.130694863 | 1.286884847 | -4.763980924 | 1.90E-06    | 1.59E-05    |
| ENSG00000178401 | 35.28313283 | -2.357886722 | 0.361816479 | -6.516803027 | 7.18E-11    | 1.16E-09    |

|                 |             |              |             |              |             |             |
|-----------------|-------------|--------------|-------------|--------------|-------------|-------------|
| ENSG00000178404 | 20.47607937 | 0.419254503  | 0.390299938 | 1.074185419  | 0.282739586 | 0.452173323 |
| ENSG00000178409 | 230.4026424 | 0.087801828  | 0.126736295 | 0.692791499  | 0.488440408 | 0.648303739 |
| ENSG00000178425 | 146.4171653 | -1.65807599  | 0.171186062 | -9.685811837 | 3.46E-22    | 1.31E-20    |
| ENSG00000178445 | 567.2249633 | 0.468728776  | 0.089357068 | 5.245570229  | 1.56E-07    | 1.59E-06    |
| ENSG00000178449 | 37.82622755 | -0.070817161 | 0.284245992 | -0.249140404 | 0.803252177 | 0.883231571 |
| ENSG00000178464 | 9.785319921 | 0.116416217  | 0.5453893   | 0.213455264  | 0.830971879 | 0.901433469 |
| ENSG00000178498 | 265.8555095 | -0.236407177 | 0.116466985 | -2.029821391 | 0.042374698 | 0.107192037 |
| ENSG00000178502 | 291.9487492 | 0.193425473  | 0.112391893 | 1.720991324  | 0.085252398 | 0.185521369 |
| ENSG00000178522 | 42.05558665 | -8.674064011 | 1.199275783 | -7.232751747 | 4.73E-13    | 9.75E-12    |
| ENSG00000178531 | 250.5070308 | 0.315811303  | 0.266012002 | 1.187206973  | 0.235145991 | 0.396149644 |
| ENSG00000178537 | 52.48629514 | 0.420246218  | 0.258327277 | 1.626797691  | 0.103780072 | 0.215867235 |
| ENSG00000178538 | 7.960095128 | -3.838111999 | 0.976136217 | -3.931943036 | 8.43E-05    | 0.000495242 |
| ENSG00000178568 | 530.3020765 | -0.562170381 | 0.08828035  | -6.368012593 | 1.91E-10    | 2.91E-09    |
| ENSG00000178585 | 58.13936366 | -0.701476816 | 0.231339688 | -3.032237231 | 0.002427483 | 0.009635168 |
| ENSG00000178605 | 205.4831665 | 0.266776783  | 0.127480259 | 2.092690929  | 0.036376753 | 0.094451803 |
| ENSG00000178607 | 145.8184242 | -0.104969886 | 0.153174115 | -0.685297813 | 0.493156012 | 0.652452163 |
| ENSG00000178662 | 10.46525671 | -1.828176373 | 0.619386158 | -2.951593849 | 0.003161385 | 0.012083801 |
| ENSG00000178665 | 35.68449684 | -0.395602129 | 0.291338362 | -1.357878607 | 0.174502207 | 0.318907337 |
| ENSG00000178685 | 39.65571597 | 1.989162547  | 0.306940663 | 6.480609394  | 9.14E-11    | 1.45E-09    |
| ENSG00000178691 | 653.0151358 | 0.027435655  | 0.084745601 | 0.323741346  | 0.746133865 | 0.845169132 |
| ENSG00000178694 | 171.7810403 | -0.654877551 | 0.142929603 | -4.581818874 | 4.61E-06    | 3.55E-05    |
| ENSG00000178700 | 42.85232558 | 0.333249181  | 0.270677916 | 1.231165017  | 0.218261152 | 0.375264921 |
| ENSG00000178715 | 97.63302377 | 0.134616524  | 0.179260693 | 0.750953943  | 0.452680375 | 0.61729941  |
| ENSG00000178718 | 319.0604201 | 0.143530026  | 0.116475274 | 1.232278931  | 0.217844907 | 0.37491637  |
| ENSG00000178719 | 1359.187402 | 0.531446613  | 0.078864465 | 6.73873351   | 1.60E-11    | 2.76E-10    |
| ENSG00000178741 | 1483.609453 | 0.325906984  | 0.072240516 | 4.511415531  | 6.44E-06    | 4.81E-05    |
| ENSG00000178752 | 51.7147349  | 0.106534689  | 0.250172889 | 0.425844261  | 0.670221333 | 0.789550408 |
| ENSG00000178761 | 204.7194576 | 0.114980685  | 0.133720065 | 0.859861121  | 0.389865602 | 0.558214797 |
| ENSG00000178773 | 346.7597757 | 0.508269218  | 0.115297243 | 4.40833802   | 1.04E-05    | 7.44E-05    |
| ENSG00000178802 | 331.6415869 | 0.366865583  | 0.106293549 | 3.45143789   | 0.000557608 | 0.00266782  |
| ENSG00000178814 | 286.15941   | 1.365444455  | 0.125748231 | 10.85855793  | 1.82E-27    | 8.98E-26    |
| ENSG00000178821 | 86.90751313 | 0.491704448  | 0.199086232 | 2.469806384  | 0.01351862  | 0.041643871 |
| ENSG00000178878 | 17.5532305  | -1.039507558 | 0.457745373 | -2.27092969  | 0.023151235 | 0.065015072 |
| ENSG00000178882 | 11.28008322 | 0.457315853  | 0.52209158  | 0.875930336  | 0.381067907 | 0.550538001 |
| ENSG00000178904 | 183.7509666 | 0.181679002  | 0.139596814 | 1.301455218  | 0.193102683 | 0.343834883 |
| ENSG00000178913 | 472.6617913 | -0.000539948 | 0.095301112 | -0.005665702 | 0.995479448 | 0.997940364 |
| ENSG00000178917 | 96.73539004 | -0.05229192  | 0.179878535 | -0.290706836 | 0.771275543 | 0.863328623 |
| ENSG00000178919 | 172.2305736 | -1.416159739 | 0.165122548 | -8.576416463 | 9.79E-18    | 2.85E-16    |
| ENSG00000178921 | 481.4836654 | 0.110110527  | 0.092600805 | 1.189088229  | 0.23440495  | 0.39518559  |
| ENSG00000178927 | 265.0199145 | -0.262732587 | 0.117141731 | -2.242860711 | 0.024905798 | 0.06903152  |
| ENSG00000178935 | 21.74715027 | 0.582705256  | 0.367982578 | 1.583513165  | 0.113304549 | 0.23123478  |
| ENSG00000178947 | 99.03387221 | 1.088639506  | 0.187356437 | 5.810526305  | 6.23E-09    | 7.89E-08    |
| ENSG00000178950 | 583.6884212 | 0.048983774  | 0.091607451 | 0.534713867  | 0.592847731 | 0.733089931 |
| ENSG00000178951 | 928.7003372 | 0.329837566  | 0.073531562 | 4.485659726  | 7.27E-06    | 5.37E-05    |
| ENSG00000178952 | 3549.012632 | 0.178868646  | 0.059389379 | 3.011795168  | 0.002597078 | 0.010213088 |
| ENSG00000178966 | 66.00056253 | -0.769134775 | 0.224547165 | -3.425270474 | 0.000614188 | 0.002909779 |
| ENSG00000178971 | 157.975818  | 0.134690011  | 0.144076462 | 0.934850908  | 0.34986514  | 0.521881238 |
| ENSG00000178974 | 232.729146  | 0.043877644  | 0.129432132 | 0.339001173  | 0.734608847 | 0.83646822  |
| ENSG00000178980 | 518.3078271 | 0.133232757  | 0.095495331 | 1.395175622  | 0.162962887 | 0.303277645 |
| ENSG00000178982 | 1111.956806 | 0.159403372  | 0.089160323 | 1.787828557  | 0.073803672 | 0.165346121 |



|                 |             |              |             |              |             |             |
|-----------------|-------------|--------------|-------------|--------------|-------------|-------------|
| ENSG00000178988 | 212.0539705 | -0.345309087 | 0.134953018 | -2.558735573 | 0.010505362 | 0.033591519 |
| ENSG00000178996 | 238.2746192 | -0.0985821   | 0.124266503 | -0.793311935 | 0.427596105 | 0.594815061 |
| ENSG00000178999 | 356.6509091 | -0.264115255 | 0.102748931 | -2.570491518 | 0.010155431 | 0.032711154 |
| ENSG00000179010 | 1526.980451 | -0.019394558 | 0.065242787 | -0.297267457 | 0.766262325 | 0.859082439 |
| ENSG00000179021 | 113.4272335 | -0.108546147 | 0.176373155 | -0.615434629 | 0.538267728 | 0.688933648 |
| ENSG00000179029 | 93.88159439 | 0.114270926  | 0.182475694 | 0.62622546   | 0.53116707  | 0.683094573 |
| ENSG00000179041 | 390.3079331 | 0.086220352  | 0.107480919 | 0.802192169  | 0.422441806 | 0.589928798 |
| ENSG00000179046 | 7.239609575 | -1.991839146 | 0.736778604 | -2.703443255 | 0.006862516 | 0.023403197 |
| ENSG00000179051 | 1177.913389 | -0.202439593 | 0.072944351 | -2.775260732 | 0.005515747 | 0.019433082 |
| ENSG00000179071 | 11.80741267 | -0.827932158 | 0.520657018 | -1.590168055 | 0.111796929 | 0.228777697 |
| ENSG00000179082 | 20.3254309  | -0.969684436 | 0.404424346 | -2.397690557 | 0.016498797 | 0.049320834 |
| ENSG00000179083 | 24.50955071 | -3.48499165  | 0.520557733 | -6.694726505 | 2.16E-11    | 3.67E-10    |
| ENSG00000179085 | 408.7248682 | 0.572509853  | 0.127999472 | 4.472751677  | 7.72E-06    | 5.68E-05    |
| ENSG00000179091 | 1345.291284 | 0.341242209  | 0.070976951 | 4.807789075  | 1.53E-06    | 1.30E-05    |
| ENSG00000179094 | 759.2168257 | 0.055215546  | 0.080767437 | 0.683636223  | 0.494204906 | 0.65345363  |
| ENSG00000179097 | 14.26991445 | -7.115913797 | 1.235550936 | -5.759304284 | 8.45E-09    | 1.05E-07    |
| ENSG00000179104 | 243.1278    | 0.494784363  | 0.120235981 | 4.115110609  | 3.87E-05    | 0.000244319 |
| ENSG00000179111 | 78.61845046 | -0.948365213 | 0.210432951 | -4.506733415 | 6.58E-06    | 4.90E-05    |
| ENSG00000179115 | 778.669962  | 0.302567897  | 0.084752557 | 3.570014956  | 0.000356961 | 0.001795284 |
| ENSG00000179119 | 173.9260565 | 0.087499348  | 0.150879525 | 0.579928575  | 0.561962785 | 0.70822638  |
| ENSG00000179134 | 1221.620679 | 0.362776039  | 0.06920215  | 5.242265434  | 1.59E-07    | 1.62E-06    |
| ENSG00000179151 | 237.1087651 | -0.100113687 | 0.120493747 | -0.830862096 | 0.406051538 | 0.574343567 |
| ENSG00000179152 | 336.9706419 | 0.075350756  | 0.1068118   | 0.705453478  | 0.480528074 | 0.640992373 |
| ENSG00000179163 | 89.66328334 | 0.350551463  | 0.188837153 | 1.856369134  | 0.063400961 | 0.147181177 |
| ENSG00000179168 | 17.60648376 | 0.350267899  | 0.412000487 | 0.850163798  | 0.395234026 | 0.563217718 |
| ENSG00000179195 | 1312.265649 | 0.712406194  | 0.069564471 | 10.24094891  | 1.30E-24    | 5.63E-23    |
| ENSG00000179218 | 5994.565454 | -0.51749917  | 0.058043257 | -8.915750087 | 4.85E-19    | 1.56E-17    |
| ENSG00000179222 | 133.6015919 | 0.109838334  | 0.154725775 | 0.709890345  | 0.477772138 | 0.638134946 |
| ENSG00000179240 | 31.33682152 | -0.837355467 | 0.332006253 | -2.522107516 | 0.011665405 | 0.036773775 |
| ENSG00000179241 | 288.357528  | 0.254632955  | 0.110473089 | 2.304931979  | 0.021170383 | 0.060529284 |
| ENSG00000179262 | 1142.350149 | 0.305806128  | 0.072879507 | 4.196051018  | 2.72E-05    | 0.000177208 |
| ENSG00000179271 | 1746.733878 | 0.421941985  | 0.07045196  | 5.989073761  | 2.11E-09    | 2.83E-08    |
| ENSG00000179295 | 1285.217816 | 0.064862971  | 0.0697999   | 0.92927026   | 0.352749044 | 0.524165716 |
| ENSG00000179299 | 47.62671912 | -3.544928608 | 0.378301245 | -9.370650131 | 7.21E-21    | 2.56E-19    |
| ENSG00000179331 | 56.03937149 | -0.253543987 | 0.241095364 | -1.051633607 | 0.292967683 | 0.463541004 |
| ENSG00000179335 | 267.5192519 | 0.540374122  | 0.117393587 | 4.603097471  | 4.16E-06    | 3.23E-05    |
| ENSG00000179348 | 628.5342286 | 0.329016901  | 0.106011308 | 3.103601942  | 0.001911804 | 0.007872914 |
| ENSG00000179361 | 412.0855778 | -0.172875026 | 0.098852533 | -1.748817371 | 0.080322593 | 0.177070224 |
| ENSG00000179364 | 291.9788248 | -0.153542586 | 0.116097953 | -1.322526214 | 0.185992986 | 0.334012206 |
| ENSG00000179387 | 134.1595126 | -0.354092719 | 0.159812397 | -2.215677426 | 0.026713602 | 0.073333197 |
| ENSG00000179388 | 652.5898005 | 0.21925878   | 0.0933491   | 2.348804432  | 0.018833796 | 0.054956031 |
| ENSG00000179399 | 12.83256612 | -5.136688916 | 1.06998045  | -4.800731559 | 1.58E-06    | 1.34E-05    |
| ENSG00000179403 | 463.5586496 | 0.01335015   | 0.092525604 | 0.144286012  | 0.885274623 | 0.937110221 |
| ENSG00000179406 | 73.76231281 | 0.096973526  | 0.218113509 | 0.44460119   | 0.656607987 | 0.779779681 |
| ENSG00000179409 | 484.9678746 | 0.226197943  | 0.093544628 | 2.418075174  | 0.015602853 | 0.047086843 |
| ENSG00000179431 | 131.8754038 | 0.397825145  | 0.167581142 | 2.373925485  | 0.017600102 | 0.052070057 |
| ENSG00000179454 | 81.33855136 | 0.166834476  | 0.194586301 | 0.857380379  | 0.391234699 | 0.559526962 |
| ENSG00000179455 | 90.11490151 | -1.158863898 | 0.195573397 | -5.925467949 | 3.11E-09    | 4.07E-08    |
| ENSG00000179476 | 18.18472299 | 0.504157874  | 0.407138402 | 1.238296048  | 0.215606309 | 0.371929488 |
| ENSG00000179477 | 14.01880247 | -0.262485398 | 0.456423627 | -0.57509161  | 0.565229342 | 0.710947988 |

|                 |             |              |             |              |             |             |
|-----------------|-------------|--------------|-------------|--------------|-------------|-------------|
| ENSG00000179523 | 43.48455817 | -0.597199964 | 0.272656342 | -2.19030285  | 0.02850228  | 0.077247064 |
| ENSG00000179526 | 143.688229  | -0.061742253 | 0.153301486 | -0.402750518 | 0.687131766 | 0.802739514 |
| ENSG00000179532 | 238.2806363 | -0.083983269 | 0.132780687 | -0.632496113 | 0.527062747 | 0.68011559  |
| ENSG00000179542 | 18.56914143 | -0.067638302 | 0.399732818 | -0.169208779 | 0.865632425 | 0.924539133 |
| ENSG00000179562 | 164.6673844 | 0.728623374  | 0.146714134 | 4.96627935   | 6.82E-07    | 6.28E-06    |
| ENSG00000179588 | 68.62994623 | -0.500576819 | 0.21891023  | -2.286676231 | 0.022214728 | 0.062736286 |
| ENSG00000179598 | 109.8906167 | 0.184421065  | 0.180568381 | 1.021336428  | 0.307095073 | 0.478138383 |
| ENSG00000179604 | 283.0572306 | 0.158395399  | 0.114514623 | 1.383189282  | 0.166606835 | 0.30849621  |
| ENSG00000179627 | 82.51142471 | -0.115790649 | 0.209363731 | -0.553059731 | 0.58022251  | 0.723159339 |
| ENSG00000179630 | 34.56225317 | 0.847806317  | 0.306800546 | 2.763379425  | 0.005720622 | 0.020018593 |
| ENSG00000179632 | 513.753259  | 0.197809482  | 0.08938974  | 2.212887978  | 0.02690537  | 0.073773127 |
| ENSG00000179698 | 9.494008775 | -0.993433669 | 0.59291675  | -1.675502789 | 0.093835624 | 0.199616702 |
| ENSG00000179743 | 13.85860778 | -0.56561236  | 0.470865489 | -1.20121855  | 0.229666435 | 0.388596051 |
| ENSG00000179750 | 330.8502566 | -0.094464968 | 0.121734592 | -0.775991169 | 0.4377542   | 0.603314879 |
| ENSG00000179761 | 9.01350524  | -1.186289852 | 0.601904871 | -1.970892593 | 0.048736163 | 0.11958024  |
| ENSG00000179818 | 158.0451049 | -0.206864413 | 0.145785906 | -1.4189603   | 0.155910591 | 0.293418551 |
| ENSG00000179820 | 922.2303057 | -0.309843007 | 0.076323004 | -4.05962803  | 4.92E-05    | 0.000303349 |
| ENSG00000179832 | 221.8876979 | -0.167391127 | 0.125965383 | -1.328866101 | 0.18389215  | 0.331298323 |
| ENSG00000179833 | 587.3988796 | -0.006566252 | 0.092078509 | -0.071311454 | 0.943149879 | 0.968637121 |
| ENSG00000179841 | 23.64806206 | -0.965988857 | 0.377251201 | -2.560598496 | 0.010449204 | 0.033462203 |
| ENSG00000179855 | 29.76730596 | -2.398031594 | 0.391018099 | -6.132789245 | 8.64E-10    | 1.21E-08    |
| ENSG00000179859 | 20.96253511 | 0.317846609  | 0.398688511 | 0.797230422  | 0.425317221 | 0.592583912 |
| ENSG00000179862 | 43.62516425 | 0.929333443  | 0.2852154   | 3.258356463  | 0.001120595 | 0.004967184 |
| ENSG00000179886 | 110.11086   | 0.197316931  | 0.179981653 | 1.096316917  | 0.272940109 | 0.440962434 |
| ENSG00000179889 | 536.6588418 | -0.124069686 | 0.090626241 | -1.369026073 | 0.170991125 | 0.314052555 |
| ENSG00000179899 | 59.86841401 | -0.328725455 | 0.238978672 | -1.375543063 | 0.168963145 | 0.311407528 |
| ENSG00000179912 | 349.5003925 | 0.075998216  | 0.106270584 | 0.715138781  | 0.474523292 | 0.635669339 |
| ENSG00000179918 | 191.8536207 | -0.209981241 | 0.14790431  | -1.419710088 | 0.1556921   | 0.293203771 |
| ENSG00000179922 | 46.56258241 | 0.032576064  | 0.265825339 | 0.122546872  | 0.902465927 | 0.947258155 |
| ENSG00000179933 | 119.2715165 | 0.014035194  | 0.183975323 | 0.076288459  | 0.939189607 | 0.96636364  |
| ENSG00000179941 | 53.13781394 | -0.875463875 | 0.246376199 | -3.553362206 | 0.00038034  | 0.00190062  |
| ENSG00000179943 | 150.3598115 | 0.00925738   | 0.148850834 | 0.062192328  | 0.950409672 | 0.972594511 |
| ENSG00000179950 | 825.5974966 | 0.212048395  | 0.079021452 | 2.683428231  | 0.007287161 | 0.024689522 |
| ENSG00000179954 | 58.07492392 | 0.137476792  | 0.240038879 | 0.572727187  | 0.566829426 | 0.712314631 |
| ENSG00000179958 | 312.2053714 | -0.187834902 | 0.128822086 | -1.458095484 | 0.144814226 | 0.277783072 |
| ENSG00000179965 | 127.5764534 | 0.099618187  | 0.162982553 | 0.611219948  | 0.541053979 | 0.690800331 |
| ENSG00000179981 | 759.8041368 | 1.164270756  | 0.083060312 | 14.01717288  | 1.22E-44    | 1.07E-42    |
| ENSG00000179988 | 108.647529  | -0.177112192 | 0.175499898 | -1.009186867 | 0.312885024 | 0.484076461 |
| ENSG00000180008 | 215.5465394 | -0.026405269 | 0.129595124 | -0.203752026 | 0.838547284 | 0.905873545 |
| ENSG00000180011 | 398.3766591 | 0.487814167  | 0.098546211 | 4.950105744  | 7.42E-07    | 6.76E-06    |
| ENSG00000180035 | 112.6177423 | -0.036343779 | 0.18126316  | -0.200502845 | 0.841087333 | 0.907697202 |
| ENSG00000180066 | 16.07896188 | 1.063425692  | 0.441807551 | 2.406988492  | 0.016084677 | 0.048309056 |
| ENSG00000180071 | 259.6147362 | -0.382476867 | 0.123934339 | -3.086125041 | 0.002027835 | 0.008268506 |
| ENSG00000180096 | 31.2251686  | -0.250050906 | 0.335831465 | -0.744572596 | 0.45653014  | 0.620201052 |
| ENSG00000180098 | 70.62325773 | 0.225187006  | 0.208338615 | 1.080870224  | 0.279754845 | 0.448534962 |
| ENSG00000180104 | 228.7926949 | 0.351729834  | 0.123708571 | 2.843213132  | 0.004466119 | 0.016270418 |
| ENSG00000180139 | 10.19749673 | 0.073096574  | 0.54703469  | 0.133623288  | 0.893700468 | 0.942407513 |
| ENSG00000180182 | 767.9291487 | 0.218130885  | 0.07893679  | 2.763361485  | 0.005720937 | 0.020018593 |
| ENSG00000180185 | 101.8935849 | -0.370198799 | 0.174950714 | -2.116017652 | 0.034343306 | 0.090037406 |
| ENSG00000180190 | 127.4144675 | 0.132992967  | 0.161138279 | 0.825334414  | 0.409181759 | 0.577637398 |

|                 |             |              |             |              |             |             |
|-----------------|-------------|--------------|-------------|--------------|-------------|-------------|
| ENSG00000180198 | 642.8524036 | 0.365930789  | 0.086968791 | 4.207610372  | 2.58E-05    | 0.000169566 |
| ENSG00000180228 | 393.6485896 | 0.11357744   | 0.102442135 | 1.108698484  | 0.267560276 | 0.434425455 |
| ENSG00000180233 | 35.53179053 | -1.494941887 | 0.312630705 | -4.781814016 | 1.74E-06    | 1.46E-05    |
| ENSG00000180257 | 20.7500853  | 0.620039115  | 0.38948289  | 1.591954696  | 0.111394884 | 0.228188751 |
| ENSG00000180263 | 85.62092533 | -1.082781261 | 0.19935952  | -5.431299504 | 5.59E-08    | 6.15E-07    |
| ENSG00000180304 | 362.3779861 | 0.113249479  | 0.107023953 | 1.058169464  | 0.28997819  | 0.460262558 |
| ENSG00000180318 | 16.97430422 | -7.364998175 | 1.227290268 | -6.001023857 | 1.96E-09    | 2.64E-08    |
| ENSG00000180329 | 359.5258281 | -0.243258252 | 0.102598702 | -2.370968121 | 0.017741561 | 0.052378249 |
| ENSG00000180340 | 221.5723797 | -0.287163499 | 0.132593286 | -2.165746904 | 0.030330533 | 0.081214829 |
| ENSG00000180346 | 59.23006507 | 0.203235086  | 0.233423569 | 0.8706708    | 0.383933926 | 0.553140499 |
| ENSG00000180354 | 37.17697236 | 0.409961012  | 0.292099717 | 1.403496778  | 0.160468752 | 0.299530429 |
| ENSG00000180357 | 1233.3444   | -0.144860091 | 0.068723147 | -2.107879195 | 0.03504144  | 0.091543074 |
| ENSG00000180370 | 777.3100293 | 0.554036918  | 0.078933911 | 7.0189974    | 2.23E-12    | 4.29E-11    |
| ENSG00000180376 | 301.0791546 | -0.186378917 | 0.122659467 | -1.519482524 | 0.128641084 | 0.254474201 |
| ENSG00000180398 | 654.4816198 | 0.044535214  | 0.082864688 | 0.537445014  | 0.590960257 | 0.731900787 |
| ENSG00000180422 | 7.055584835 | -3.144804728 | 0.892444877 | -3.52380837  | 0.000425392 | 0.002097395 |
| ENSG00000180423 | 9.578529503 | -0.156911748 | 0.553811809 | -0.283330448 | 0.776923539 | 0.86628393  |
| ENSG00000180425 | 13.71889869 | -0.663306315 | 0.469900796 | -1.411587978 | 0.158071314 | 0.296319858 |
| ENSG00000180448 | 131.1303331 | 0.44167503   | 0.161576311 | 2.733538275  | 0.006265784 | 0.021632248 |
| ENSG00000180479 | 33.08555177 | 0.064269219  | 0.311754909 | 0.206153029  | 0.836671377 | 0.904612287 |
| ENSG00000180488 | 150.1551034 | 0.723841705  | 0.158950655 | 4.553876843  | 5.27E-06    | 4.02E-05    |
| ENSG00000180525 | 13.74625018 | 0.191951621  | 0.471541773 | 0.407072357  | 0.683954845 | 0.800159383 |
| ENSG00000180530 | 306.1100201 | -0.428490839 | 0.111459192 | -3.84437417  | 0.00012086  | 0.00068374  |
| ENSG00000180535 | 18.45789529 | 0.808838339  | 0.408708546 | 1.979010099  | 0.047814869 | 0.117792962 |
| ENSG00000180573 | 789.9398995 | -0.175864362 | 0.081398026 | -2.160548251 | 0.030730253 | 0.082144216 |
| ENSG00000180574 | 12.84822933 | 0.3162677    | 0.484739117 | 0.652449305  | 0.514111366 | 0.669918586 |
| ENSG00000180592 | 288.288647  | -0.137529654 | 0.117840263 | -1.167085436 | 0.243175869 | 0.406039673 |
| ENSG00000180596 | 1005.964025 | -0.472059766 | 0.094439127 | -4.998561296 | 5.78E-07    | 5.38E-06    |
| ENSG00000180628 | 23.69299623 | 0.399526633  | 0.359321039 | 1.111893237  | 0.266184057 | 0.43306549  |
| ENSG00000180660 | 35.55196809 | -0.084536093 | 0.303509554 | -0.278528606 | 0.780606609 | 0.868601276 |
| ENSG00000180667 | 217.1898513 | 0.190172317  | 0.131791845 | 1.442974835  | 0.14902756  | 0.28361877  |
| ENSG00000180694 | 136.1491211 | 0.420810426  | 0.17086519  | 2.462821278  | 0.013784861 | 0.042343307 |
| ENSG00000180720 | 16.98352323 | -0.274206468 | 0.426494876 | -0.642930276 | 0.520269343 | 0.674688281 |
| ENSG00000180730 | 6.364615773 | -3.050784374 | 0.921906395 | -3.309212726 | 0.000935587 | 0.004236684 |
| ENSG00000180739 | 52.54000937 | -0.52432739  | 0.26142348  | -2.005662961 | 0.04489222  | 0.11205875  |
| ENSG00000180758 | 116.6398184 | -0.053215136 | 0.169162363 | -0.314580235 | 0.753080388 | 0.850814585 |
| ENSG00000180769 | 26.38938614 | 0.182922334  | 0.352579266 | 0.518811943  | 0.603891889 | 0.74150956  |
| ENSG00000180776 | 321.3578752 | -0.122929856 | 0.108006645 | -1.138169372 | 0.255049765 | 0.420305497 |
| ENSG00000180806 | 234.0366368 | -0.135036303 | 0.130668805 | -1.033424189 | 0.301405432 | 0.471851946 |
| ENSG00000180815 | 6.929887912 | -1.99218132  | 0.737933327 | -2.699676578 | 0.006940691 | 0.02361819  |
| ENSG00000180817 | 1126.453433 | 0.651453803  | 0.0811902   | 8.023798488  | 1.03E-15    | 2.63E-14    |
| ENSG00000180818 | 330.3964391 | 0.167890957  | 0.111785459 | 1.501903364  | 0.133122068 | 0.261408368 |
| ENSG00000180822 | 108.71603   | 0.076997542  | 0.176652754 | 0.435869465  | 0.662931441 | 0.784604829 |
| ENSG00000180867 | 66.38928982 | 0.098114254  | 0.22592549  | 0.434277043  | 0.664087273 | 0.78515562  |
| ENSG00000180879 | 629.1572021 | 0.410224799  | 0.084790474 | 4.838100076  | 1.31E-06    | 1.13E-05    |
| ENSG00000180884 | 36.33227709 | -0.06309086  | 0.293757769 | -0.214771716 | 0.829945306 | 0.90073721  |
| ENSG00000180891 | 69.69495196 | -0.190580375 | 0.21916582  | -0.869571613 | 0.384534556 | 0.55366512  |
| ENSG00000180900 | 739.1407852 | 0.280435904  | 0.095683911 | 2.930857469  | 0.003380278 | 0.012808948 |
| ENSG00000180901 | 183.1148905 | 0.080444588  | 0.135673574 | 0.592927461  | 0.553229699 | 0.700488334 |
| ENSG00000180902 | 72.38839713 | -0.499662693 | 0.212605462 | -2.350187468 | 0.018763958 | 0.054809174 |

|                 |             |              |             |              |             |             |
|-----------------|-------------|--------------|-------------|--------------|-------------|-------------|
| ENSG00000180917 | 191.1833332 | -0.039366845 | 0.137523066 | -0.286256307 | 0.77468182  | 0.865083113 |
| ENSG00000180921 | 295.6232386 | 0.351497015  | 0.139151105 | 2.526009523  | 0.011536635 | 0.036425066 |
| ENSG00000180957 | 572.9486358 | 0.148422801  | 0.086442086 | 1.717020125  | 0.085975495 | 0.186690026 |
| ENSG00000180964 | 133.4962264 | -8.54112584  | 1.005972343 | -8.490418155 | 2.06E-17    | 5.84E-16    |
| ENSG00000180979 | 103.8782855 | 0.108815795  | 0.181436622 | 0.599745485  | 0.54867587  | 0.696984078 |
| ENSG00000180992 | 210.8747422 | 0.234707153  | 0.132050351 | 1.777406501  | 0.075501382 | 0.168344113 |
| ENSG00000180998 | 19.66993166 | -0.574311038 | 0.395234229 | -1.453090334 | 0.146198674 | 0.279712991 |
| ENSG00000181004 | 6.510926582 | -1.404496653 | 0.7144753   | -1.965773559 | 0.049324773 | 0.12058216  |
| ENSG00000181007 | 159.0920433 | 0.365853627  | 0.144844373 | 2.525839423  | 0.011542222 | 0.036434517 |
| ENSG00000181019 | 801.2166053 | -0.520654726 | 0.099164474 | -5.250415846 | 1.52E-07    | 1.56E-06    |
| ENSG00000181026 | 584.5129575 | 0.038580973  | 0.088605115 | 0.435426023  | 0.663253225 | 0.784755231 |
| ENSG00000181027 | 105.3124186 | -0.329266366 | 0.203071646 | -1.621429546 | 0.104925548 | 0.217773224 |
| ENSG00000181031 | 18.25613842 | -0.302374993 | 0.415239344 | -0.728194467 | 0.466494552 | 0.628880558 |
| ENSG00000181035 | 81.10256069 | 0.347067423  | 0.221108747 | 1.569668444  | 0.116492266 | 0.235990463 |
| ENSG00000181038 | 60.29665773 | 0.196597675  | 0.241897651 | 0.812730813  | 0.416372411 | 0.584177312 |
| ENSG00000181045 | 92.1762046  | -0.095308542 | 0.185385722 | -0.514109399 | 0.607175506 | 0.743915773 |
| ENSG00000181061 | 110.2676    | -0.244906984 | 0.172392501 | -1.420635946 | 0.155422623 | 0.292931918 |
| ENSG00000181085 | 76.05024203 | 0.177569097  | 0.216137488 | 0.821556215  | 0.411329517 | 0.579707608 |
| ENSG00000181090 | 681.3094148 | 0.13874296   | 0.090209185 | 1.538013677  | 0.124045271 | 0.248072881 |
| ENSG00000181097 | 9.880750257 | -0.316672973 | 0.548714264 | -0.577118172 | 0.563859629 | 0.70997994  |
| ENSG00000181104 | 21.60381007 | 0.106227409  | 0.391793797 | 0.27113091   | 0.786290349 | 0.872090054 |
| ENSG00000181135 | 83.38631664 | -0.188138953 | 0.204053688 | -0.922007119 | 0.356524862 | 0.52783566  |
| ENSG00000181163 | 5608.829963 | 0.093374589  | 0.051933014 | 1.797981309  | 0.07217997  | 0.162694486 |
| ENSG00000181191 | 61.38355501 | 0.143749823  | 0.229555129 | 0.62621046   | 0.531176907 | 0.683094573 |
| ENSG00000181192 | 179.8650866 | -0.710016479 | 0.138697704 | -5.11916535  | 3.07E-07    | 2.99E-06    |
| ENSG00000181218 | 311.7103532 | -0.020325516 | 0.120225795 | -0.169061187 | 0.865748514 | 0.924545891 |
| ENSG00000181220 | 524.4120925 | 0.798057207  | 0.096563382 | 8.264594606  | 1.40E-16    | 3.77E-15    |
| ENSG00000181222 | 6485.679859 | 0.098201013  | 0.056440854 | 1.739892389  | 0.081877915 | 0.179849738 |
| ENSG00000181264 | 49.85537961 | -0.439091126 | 0.24972318  | -1.758311446 | 0.078694531 | 0.17424686  |
| ENSG00000181274 | 107.1271436 | -0.346664026 | 0.172909617 | -2.004885749 | 0.044975263 | 0.112174629 |
| ENSG00000181284 | 28.70438173 | 0.259148874  | 0.330304853 | 0.784574831  | 0.432702891 | 0.599012271 |
| ENSG00000181315 | 17.42621242 | 0.256525965  | 0.425132377 | 0.603402562  | 0.546240918 | 0.694729455 |
| ENSG00000181350 | 45.82128422 | 1.025015996  | 0.264507501 | 3.875186869  | 0.000106543 | 0.00061111  |
| ENSG00000181381 | 81.00036219 | -1.011238732 | 0.205670367 | -4.916793534 | 8.80E-07    | 7.88E-06    |
| ENSG00000181392 | 20.76514334 | -3.037426795 | 0.513066754 | -5.92013957  | 3.22E-09    | 4.19E-08    |
| ENSG00000181396 | 408.7749375 | 0.322539096  | 0.104812314 | 3.077301539  | 0.002088839 | 0.008468086 |
| ENSG00000181409 | 112.7533794 | 0.28857519   | 0.190710094 | 1.513161591  | 0.130238618 | 0.257019088 |
| ENSG00000181418 | 48.52844071 | 1.377923851  | 0.279958615 | 4.921884092  | 8.57E-07    | 7.69E-06    |
| ENSG00000181444 | 680.2755581 | 0.10149826   | 0.082526803 | 1.229882367  | 0.218741158 | 0.375814218 |
| ENSG00000181450 | 154.3636211 | -0.169649062 | 0.147450356 | -1.150550367 | 0.249917262 | 0.413838003 |
| ENSG00000181458 | 70.82773228 | 0.920715492  | 0.214161591 | 4.299162543  | 1.71E-05    | 0.000116847 |
| ENSG00000181467 | 280.4700255 | 0.179960594  | 0.121876642 | 1.476579848  | 0.139788297 | 0.27068438  |
| ENSG00000181472 | 95.93291129 | -0.277239466 | 0.185839978 | -1.491818227 | 0.135746804 | 0.264985458 |
| ENSG00000181481 | 77.11450921 | -0.017873573 | 0.20601053  | -0.086760484 | 0.930861898 | 0.962535046 |
| ENSG00000181513 | 36.94395965 | -0.756757714 | 0.305367642 | -2.478185671 | 0.013205241 | 0.04087572  |
| ENSG00000181523 | 165.0561217 | 0.223464998  | 0.147556558 | 1.514436229  | 0.129915236 | 0.256489013 |
| ENSG00000181524 | 34.67861898 | 0.532340871  | 0.314876297 | 1.690634943  | 0.090906547 | 0.194867123 |
| ENSG00000181544 | 91.19018672 | -0.429869039 | 0.191464677 | -2.24516107  | 0.024757794 | 0.068702635 |
| ENSG00000181555 | 1584.820119 | -0.204637192 | 0.070467488 | -2.903994406 | 0.003684347 | 0.013768031 |
| ENSG00000181577 | 26.79468644 | 1.820590704  | 0.397122869 | 4.58445193   | 4.55E-06    | 3.52E-05    |

|                 |             |              |             |              |             |             |
|-----------------|-------------|--------------|-------------|--------------|-------------|-------------|
| ENSG00000181588 | 192.7978473 | 0.095973985  | 0.149993045 | 0.639856233  | 0.52226607  | 0.676216378 |
| ENSG00000181610 | 369.3303674 | 0.192574229  | 0.102418103 | 1.880275302  | 0.060070568 | 0.14101099  |
| ENSG00000181619 | 97.49448926 | 0.137688153  | 0.17725459  | 0.776781881  | 0.437287469 | 0.603159571 |
| ENSG00000181638 | 68.33989955 | -0.439463623 | 0.235458617 | -1.866415541 | 0.061983251 | 0.144558977 |
| ENSG00000181649 | 53.82173863 | -1.081460703 | 0.251879028 | -4.293571837 | 1.76E-05    | 0.000119543 |
| ENSG00000181652 | 23.21193849 | 1.141660662  | 0.367815859 | 3.103891893  | 0.001909931 | 0.007869992 |
| ENSG00000181666 | 94.96462541 | -0.343804581 | 0.189229994 | -1.816860924 | 0.069238411 | 0.157734668 |
| ENSG00000181690 | 186.5894318 | -0.058556882 | 0.141178368 | -0.41477234  | 0.67830857  | 0.795757928 |
| ENSG00000181704 | 354.9361859 | -0.115969174 | 0.114615628 | -1.011809434 | 0.311629178 | 0.483109487 |
| ENSG00000181722 | 364.4132226 | 1.514508222  | 0.112736585 | 13.43404385  | 3.82E-41    | 3.10E-39    |
| ENSG00000181744 | 135.665774  | -0.246966336 | 0.159432306 | -1.549035709 | 0.121373136 | 0.244084244 |
| ENSG00000181751 | 69.76357976 | -0.2734248   | 0.234169073 | -1.16763839  | 0.242952658 | 0.40584564  |
| ENSG00000181754 | 18.74684566 | -0.055254091 | 0.394608761 | -0.140022463 | 0.888642243 | 0.939047437 |
| ENSG00000181773 | 66.41661952 | 0.037743241  | 0.217130077 | 0.17382779   | 0.862000804 | 0.921617562 |
| ENSG00000181788 | 115.0446569 | 0.023058692  | 0.168479438 | 0.136863539  | 0.891138659 | 0.94027635  |
| ENSG00000181789 | 1219.021763 | 0.251160466  | 0.071628112 | 3.506450997  | 0.000454125 | 0.002221907 |
| ENSG00000181790 | 393.1831268 | 0.578365379  | 0.10479496  | 5.51901903   | 3.41E-08    | 3.88E-07    |
| ENSG00000181798 | 16.98535061 | -0.298483953 | 0.437750082 | -0.681859274 | 0.49532794  | 0.654135261 |
| ENSG00000181804 | 14.19781867 | 0.409624158  | 0.481832291 | 0.850138452  | 0.395248116 | 0.563217718 |
| ENSG00000181817 | 198.6373369 | 0.334569731  | 0.138907073 | 2.408586719  | 0.016014421 | 0.048170144 |
| ENSG00000181826 | 59.53141211 | -0.488217985 | 0.227567337 | -2.145378117 | 0.031922627 | 0.084622975 |
| ENSG00000181827 | 1072.288338 | -0.031152509 | 0.089995156 | -0.346157619 | 0.729224263 | 0.832773591 |
| ENSG00000181830 | 172.2560322 | 0.094859506  | 0.1484322   | 0.639076332  | 0.522773276 | 0.676623625 |
| ENSG00000181852 | 213.8621481 | -0.29474894  | 0.130680742 | -2.255488719 | 0.02410267  | 0.067229984 |
| ENSG00000181856 | 17.23846558 | -1.397333853 | 0.443321156 | -3.151967448 | 0.001621744 | 0.006836924 |
| ENSG00000181873 | 169.4319047 | -0.528945061 | 0.145713789 | -3.630027491 | 0.000283391 | 0.001462989 |
| ENSG00000181885 | 11.94436344 | -3.637329485 | 0.76337646  | -4.764791257 | 1.89E-06    | 1.58E-05    |
| ENSG00000181894 | 34.73681731 | 0.275642947  | 0.303217133 | 0.909061253  | 0.363317794 | 0.534400529 |
| ENSG00000181896 | 39.98118977 | -0.078699337 | 0.277139169 | -0.283970457 | 0.776433021 | 0.865943204 |
| ENSG00000181904 | 389.8426692 | 0.165015396  | 0.11047493  | 1.493690895  | 0.135256429 | 0.264248548 |
| ENSG00000181915 | 252.2730173 | -0.181535951 | 0.142089828 | -1.277613979 | 0.201385569 | 0.353805345 |
| ENSG00000181924 | 424.8220355 | 0.68413032   | 0.104067768 | 6.573892529  | 4.90E-11    | 8.09E-10    |
| ENSG00000181929 | 21.01871041 | -1.194546548 | 0.405303989 | -2.947285445 | 0.003205771 | 0.012223526 |
| ENSG00000181938 | 116.5383063 | 0.026228835  | 0.169670555 | 0.154586839  | 0.877147046 | 0.932155367 |
| ENSG00000181982 | 133.6517863 | 0.011598365  | 0.160226942 | 0.07238711   | 0.942293843 | 0.968180144 |
| ENSG00000181991 | 379.5801142 | 0.464356915  | 0.100689272 | 4.611781452  | 3.99E-06    | 3.11E-05    |
| ENSG00000182004 | 376.7071234 | 0.255685537  | 0.110425164 | 2.315464397  | 0.020587531 | 0.05916388  |
| ENSG00000182010 | 36.3558661  | -2.047623896 | 0.349189091 | -5.863940045 | 4.52E-09    | 5.79E-08    |
| ENSG00000182013 | 400.9548587 | 0.271673807  | 0.109513171 | 2.48074095   | 0.013110962 | 0.040628652 |
| ENSG00000182022 | 14.31264281 | -1.82379197  | 0.515202811 | -3.539949569 | 0.000400203 | 0.001985049 |
| ENSG00000182050 | 8.997069631 | -3.904942759 | 0.948183719 | -4.118339812 | 3.82E-05    | 0.00024103  |
| ENSG00000182054 | 540.0374596 | -0.74802035  | 0.088241913 | -8.47692805  | 2.31E-17    | 6.54E-16    |
| ENSG00000182057 | 15.73401193 | -1.076287489 | 0.478012586 | -2.251588182 | 0.024348309 | 0.067780557 |
| ENSG00000182087 | 772.5422009 | 0.010824268  | 0.086083074 | 0.125742112  | 0.899936066 | 0.945967201 |
| ENSG00000182093 | 59.5089769  | -0.321919768 | 0.226828625 | -1.419220206 | 0.155834827 | 0.293315264 |
| ENSG00000182095 | 510.0568844 | -0.135880245 | 0.095167986 | -1.427793641 | 0.153351264 | 0.289883623 |
| ENSG00000182107 | 980.6217807 | -5.340053882 | 0.144159734 | -37.04261736 | 2.36E-300   | 4.15E-297   |
| ENSG00000182108 | 144.2888611 | 0.201858422  | 0.166802027 | 1.21016768   | 0.226214557 | 0.384569454 |
| ENSG00000182117 | 528.8130972 | 0.116174533  | 0.089792777 | 1.293807111  | 0.195732056 | 0.346977308 |
| ENSG00000182118 | 72.93315631 | -0.383070178 | 0.212645264 | -1.801451729 | 0.071631709 | 0.161877671 |

|                 |             |              |             |              |             |             |
|-----------------|-------------|--------------|-------------|--------------|-------------|-------------|
| ENSG00000182134 | 86.35552075 | -0.147550021 | 0.192311336 | -0.767245572 | 0.442935522 | 0.607846354 |
| ENSG00000182141 | 95.15790535 | -0.417518783 | 0.182392812 | -2.289118625 | 0.022072461 | 0.062538262 |
| ENSG00000182149 | 477.0050947 | 0.381575175  | 0.09292124  | 4.106436528  | 4.02E-05    | 0.000252764 |
| ENSG00000182150 | 615.8776913 | -0.311560765 | 0.092010548 | -3.386141823 | 0.000708827 | 0.003308062 |
| ENSG00000182154 | 373.3985671 | 0.341791693  | 0.106175635 | 3.219116068  | 0.001285864 | 0.005583473 |
| ENSG00000182158 | 566.7290932 | 0.377008897  | 0.093161572 | 4.046828437  | 5.19E-05    | 0.000317625 |
| ENSG00000182165 | 18.48397725 | -0.235598156 | 0.398473262 | -0.591252108 | 0.554351514 | 0.701402964 |
| ENSG00000182168 | 181.2704217 | -0.685670624 | 0.140652094 | -4.874940753 | 1.09E-06    | 9.55E-06    |
| ENSG00000182173 | 156.9684432 | 0.30086135   | 0.157873842 | 1.90570741   | 0.056688177 | 0.134614313 |
| ENSG00000182175 | 18.16260404 | -1.614637882 | 0.456998181 | -3.533138532 | 0.000410657 | 0.002028306 |
| ENSG00000182179 | 20.3666627  | 1.132432442  | 0.408160278 | 2.774479787  | 0.005529007 | 0.019465153 |
| ENSG00000182180 | 409.8635505 | -0.083989555 | 0.099759547 | -0.841919972 | 0.39983275  | 0.56800674  |
| ENSG00000182185 | 88.91533851 | -0.807629327 | 0.213943354 | -3.774968048 | 0.000160028 | 0.000877638 |
| ENSG00000182195 | 373.342626  | -0.592626531 | 0.10566571  | -5.608503743 | 2.04E-08    | 2.40E-07    |
| ENSG00000182197 | 414.6818034 | -0.272681404 | 0.103994065 | -2.622086209 | 0.008739332 | 0.028810467 |
| ENSG00000182199 | 1197.261351 | 0.091638732  | 0.071143629 | 1.288080643  | 0.197717893 | 0.34921957  |
| ENSG00000182208 | 53.78363798 | 0.953388213  | 0.242615653 | 3.929623667  | 8.51E-05    | 0.000498999 |
| ENSG00000182220 | 270.4121437 | 0.07923042   | 0.120886245 | 0.655413032  | 0.512201863 | 0.668188838 |
| ENSG00000182224 | 39.62314509 | 0.484773326  | 0.274338034 | 1.767065688  | 0.077217228 | 0.171652224 |
| ENSG00000182247 | 169.1301142 | -0.057255359 | 0.155025707 | -0.369328156 | 0.711883142 | 0.819996249 |
| ENSG00000182253 | 2202.12861  | 1.455885446  | 0.074284415 | 19.5988007   | 1.58E-85    | 3.22E-83    |
| ENSG00000182263 | 59.08221395 | -8.199552815 | 1.192604583 | -6.875332301 | 6.18E-12    | 1.11E-10    |
| ENSG00000182272 | 233.2079286 | -0.133723337 | 0.128035373 | -1.044424942 | 0.296288829 | 0.466640787 |
| ENSG00000182307 | 342.3274782 | 0.232070989  | 0.112912747 | 2.055312572  | 0.039848824 | 0.101533907 |
| ENSG00000182308 | 10.32423415 | -0.174243505 | 0.528699487 | -0.329570029 | 0.741724872 | 0.842008184 |
| ENSG00000182310 | 43.31759419 | 0.142364189  | 0.289722816 | 0.491380662  | 0.623157239 | 0.755392625 |
| ENSG00000182318 | 61.49056873 | 0.137929179  | 0.225651752 | 0.611247983  | 0.541035422 | 0.690800331 |
| ENSG00000182324 | 29.35979818 | -0.099401054 | 0.323498703 | -0.307268787 | 0.758638792 | 0.854578918 |
| ENSG00000182325 | 59.6747857  | 0.562157261  | 0.249317235 | 2.254787007  | 0.024146701 | 0.067312703 |
| ENSG00000182326 | 43.59330703 | -0.124885809 | 0.28997172  | -0.430682717 | 0.666699087 | 0.786786699 |
| ENSG00000182359 | 13.74105483 | -0.285065976 | 0.470828575 | -0.605455979 | 0.544876066 | 0.693599827 |
| ENSG00000182362 | 120.7457993 | -0.110031179 | 0.16326646  | -0.673936208 | 0.500351871 | 0.658525507 |
| ENSG00000182372 | 35.15827288 | 0.201315902  | 0.290327133 | 0.693410569  | 0.488051931 | 0.647922265 |
| ENSG00000182378 | 822.6169331 | -0.522842658 | 0.077694211 | -6.72949314  | 1.70E-11    | 2.93E-10    |
| ENSG00000182379 | 33.20280479 | -1.717566584 | 0.329927883 | -5.2058849   | 1.93E-07    | 1.94E-06    |
| ENSG00000182389 | 201.9301107 | 0.369795572  | 0.132749925 | 2.785655593  | 0.00534196  | 0.018915681 |
| ENSG00000182400 | 266.0094098 | -0.049452541 | 0.128471985 | -0.384928596 | 0.700290319 | 0.811966827 |
| ENSG00000182405 | 16.84777243 | 0.146199437  | 0.430673639 | 0.339466881  | 0.734258042 | 0.836235019 |
| ENSG00000182446 | 1606.040286 | 0.337280785  | 0.065101007 | 5.180884296  | 2.21E-07    | 2.21E-06    |
| ENSG00000182459 | 16.69786178 | 0.025210441  | 0.429694086 | 0.058670672  | 0.953214419 | 0.974299858 |
| ENSG00000182472 | 24.16165247 | 0.810314366  | 0.372787701 | 2.173661748  | 0.029730547 | 0.079912935 |
| ENSG00000182473 | 1305.850307 | 0.02026232   | 0.067157968 | 0.301711327  | 0.762872133 | 0.856873889 |
| ENSG00000182481 | 2519.552253 | 0.197198941  | 0.066732323 | 2.955073814  | 0.003125943 | 0.011958092 |
| ENSG00000182484 | 36.88842948 | 0.207437635  | 0.292634622 | 0.708862243  | 0.478409968 | 0.638865369 |
| ENSG00000182504 | 188.6060855 | -0.63156587  | 0.136108888 | -4.640151558 | 3.48E-06    | 2.77E-05    |
| ENSG00000182511 | 38.8572671  | -0.892090649 | 0.294896476 | -3.025097687 | 0.002485528 | 0.009843309 |
| ENSG00000182512 | 176.8892665 | -0.285022741 | 0.156382651 | -1.822598215 | 0.068364266 | 0.156199227 |
| ENSG00000182518 | 69.07413429 | -0.026545209 | 0.211327453 | -0.125611738 | 0.900039271 | 0.945967201 |
| ENSG00000182534 | 501.0186457 | 0.173818365  | 0.095485631 | 1.820361488  | 0.068703973 | 0.156757575 |
| ENSG00000182541 | 106.9324865 | -0.603026782 | 0.177464526 | -3.398013089 | 0.000678772 | 0.003180356 |

|                 |             |              |             |              |             |             |
|-----------------|-------------|--------------|-------------|--------------|-------------|-------------|
| ENSG00000182544 | 76.70143296 | -0.087758889 | 0.202042968 | -0.43435755  | 0.664028818 | 0.785152594 |
| ENSG00000182551 | 345.3120125 | 0.086477305  | 0.111444146 | 0.775969919  | 0.437766747 | 0.603314879 |
| ENSG00000182552 | 22.73679533 | 0.186194668  | 0.367958631 | 0.506020655  | 0.61284215  | 0.748183007 |
| ENSG00000182568 | 120.6748089 | -7.393480032 | 0.735434353 | -10.05321549 | 8.89E-24    | 3.66E-22    |
| ENSG00000182580 | 13.62974926 | -1.232620417 | 0.499585071 | -2.467288333 | 0.013614068 | 0.04188279  |
| ENSG00000182600 | 21.31343315 | -0.353891179 | 0.38666107  | -0.915249056 | 0.360060897 | 0.531334743 |
| ENSG00000182606 | 1107.853508 | 0.196273578  | 0.070506941 | 2.783748325  | 0.005373471 | 0.019008096 |
| ENSG00000182612 | 17.1362862  | 0.285773587  | 0.411688802 | 0.694149528  | 0.487588441 | 0.64779673  |
| ENSG00000182621 | 386.7365281 | 8.356265503  | 0.518550103 | 16.1146733   | 2.01E-58    | 2.57E-56    |
| ENSG00000182628 | 408.8441497 | -0.18418853  | 0.105704718 | -1.742481631 | 0.081424203 | 0.179105195 |
| ENSG00000182636 | 28.04369443 | -2.179706025 | 0.385552847 | -5.653455926 | 1.57E-08    | 1.88E-07    |
| ENSG00000182648 | 31.64813916 | 0.163387888  | 0.335830152 | 0.486519412  | 0.626598945 | 0.757668536 |
| ENSG00000182670 | 1426.597272 | 0.130796386  | 0.071221282 | 1.836478974  | 0.066286849 | 0.152419605 |
| ENSG00000182685 | 18.54578916 | -1.13951037  | 0.426605051 | -2.671113168 | 0.007560015 | 0.025503251 |
| ENSG00000182700 | 18.61363004 | -0.427145997 | 0.406634382 | -1.050442403 | 0.293514759 | 0.463987641 |
| ENSG00000182704 | 172.0210338 | 0.071722751  | 0.141930698 | 0.505336424  | 0.613322564 | 0.748574338 |
| ENSG00000182718 | 207.573219  | 0.452214294  | 0.137017849 | 3.300404271  | 0.000965456 | 0.0043523   |
| ENSG00000182742 | 463.0150987 | 0.540574987  | 0.110809883 | 4.878400489  | 1.07E-06    | 9.40E-06    |
| ENSG00000182747 | 35.68461787 | 4.553028148  | 0.518222088 | 8.785862774  | 1.55E-18    | 4.90E-17    |
| ENSG00000182749 | 192.815896  | -0.083482839 | 0.135907995 | -0.614259954 | 0.539043561 | 0.689580557 |
| ENSG00000182759 | 172.1283874 | 1.622163719  | 0.156560796 | 10.36123829  | 3.72E-25    | 1.69E-23    |
| ENSG00000182768 | 263.5987284 | -0.055398339 | 0.126278439 | -0.438699899 | 0.660879    | 0.783076162 |
| ENSG00000182774 | 130.3294076 | 0.464589889  | 0.162375059 | 2.861214599  | 0.004220213 | 0.015498387 |
| ENSG00000182782 | 13.12421392 | -1.09405652  | 0.499893741 | -2.188578153 | 0.028627515 | 0.077526645 |
| ENSG00000182796 | 104.7616894 | -0.185933441 | 0.176117878 | -1.055732916 | 0.291090255 | 0.46155828  |
| ENSG00000182809 | 178.6200845 | 0.948644043  | 0.153193315 | 6.192463721  | 5.92E-10    | 8.52E-09    |
| ENSG00000182810 | 183.8619023 | 0.160319935  | 0.135052756 | 1.187091177  | 0.235191658 | 0.396179065 |
| ENSG00000182827 | 877.2271388 | 0.059915366  | 0.074764683 | 0.801385946  | 0.422908249 | 0.59010551  |
| ENSG00000182831 | 426.3191781 | 0.172894022  | 0.098084587 | 1.762703268  | 0.077950549 | 0.173090636 |
| ENSG00000182853 | 131.6597104 | -7.940931385 | 0.843741953 | -9.411563993 | 4.89E-21    | 1.76E-19    |
| ENSG00000182858 | 121.3010428 | 0.106623562  | 0.166905509 | 0.6388259    | 0.522936197 | 0.676628438 |
| ENSG00000182871 | 595.5671793 | 0.498591257  | 0.110753782 | 4.501798924  | 6.74E-06    | 5.01E-05    |
| ENSG00000182872 | 855.4220702 | 0.269671113  | 0.080141624 | 3.364931971  | 0.000765625 | 0.003538907 |
| ENSG00000182873 | 25.04898895 | -0.322087226 | 0.357458647 | -0.901047516 | 0.367563056 | 0.539008064 |
| ENSG00000182890 | 23.4376543  | -0.862261115 | 0.366236585 | -2.354382793 | 0.018553494 | 0.05430734  |
| ENSG00000182899 | 1924.601438 | 0.535708245  | 0.071066709 | 7.538104062  | 4.77E-14    | 1.08E-12    |
| ENSG00000182902 | 11.10056104 | -0.667167826 | 0.555338703 | -1.201371022 | 0.229607312 | 0.388542815 |
| ENSG00000182903 | 458.9375751 | -0.142719225 | 0.103781171 | -1.375193813 | 0.169071366 | 0.311509113 |
| ENSG00000182912 | 71.47079937 | 0.408751731  | 0.209125592 | 1.954575368  | 0.050633211 | 0.123052719 |
| ENSG00000182919 | 42.9760404  | -0.461470498 | 0.281668139 | -1.638348235 | 0.101349071 | 0.211912997 |
| ENSG00000182923 | 117.489634  | -0.484367578 | 0.169183847 | -2.862965851 | 0.004196958 | 0.015433159 |
| ENSG00000182934 | 431.6832394 | -0.01027499  | 0.097140713 | -0.105774293 | 0.915761433 | 0.954435272 |
| ENSG00000182944 | 2375.35027  | 0.027219583  | 0.061697258 | 0.441179787  | 0.659082845 | 0.781805162 |
| ENSG00000182952 | 196.4024811 | 0.175311676  | 0.132844319 | 1.319677632  | 0.186942671 | 0.335227518 |
| ENSG00000182957 | 86.11473074 | 0.885623831  | 0.206482414 | 4.289100527  | 1.79E-05    | 0.000121563 |
| ENSG00000182963 | 422.0403215 | -0.557677198 | 0.102340247 | -5.449246173 | 5.06E-08    | 5.59E-07    |
| ENSG00000182973 | 447.2712584 | -0.114406378 | 0.095085479 | -1.203195049 | 0.22890085  | 0.387795886 |
| ENSG00000182979 | 1341.093029 | 0.095836107  | 0.072531774 | 1.321298262  | 0.186401933 | 0.334618269 |
| ENSG00000183010 | 12.37841597 | 7.194853674  | 1.258520024 | 5.716916327  | 1.08E-08    | 1.32E-07    |
| ENSG00000183011 | 1036.15049  | 0.271299363  | 0.080767568 | 3.359013633  | 0.000782212 | 0.003607266 |

|                 |             |              |             |              |             |             |
|-----------------|-------------|--------------|-------------|--------------|-------------|-------------|
| ENSG00000183020 | 460.5586643 | -0.031768014 | 0.098980613 | -0.320951885 | 0.748246854 | 0.846879668 |
| ENSG00000183023 | 16.36945552 | -2.354859406 | 0.52742819  | -4.464796256 | 8.01E-06    | 5.88E-05    |
| ENSG00000183032 | 37.8369169  | -0.288104093 | 0.28673528  | -1.004773786 | 0.315005789 | 0.486465075 |
| ENSG00000183044 | 71.70271021 | -0.454599393 | 0.211293205 | -2.151509761 | 0.031435986 | 0.083601154 |
| ENSG00000183048 | 100.6012096 | 0.191323645  | 0.189515378 | 1.009541529  | 0.312714995 | 0.484076461 |
| ENSG00000183049 | 174.0189208 | 0.780417247  | 0.140916194 | 5.538165807  | 3.06E-08    | 3.50E-07    |
| ENSG00000183060 | 40.49583073 | -0.216568801 | 0.273524743 | -0.791770422 | 0.428494552 | 0.595563472 |
| ENSG00000183072 | 162.1791278 | 0.249731462  | 0.161742041 | 1.544010821  | 0.122585711 | 0.246029645 |
| ENSG00000183077 | 210.1125533 | 0.634282399  | 0.129486967 | 4.898426557  | 9.66E-07    | 8.58E-06    |
| ENSG00000183087 | 96.57662865 | 0.537633905  | 0.182935238 | 2.93893025   | 0.003293472 | 0.012517153 |
| ENSG00000183091 | 29.35468945 | 0.455912201  | 0.331465652 | 1.375443271  | 0.168994062 | 0.311407528 |
| ENSG00000183092 | 59.68098946 | 0.507591315  | 0.24438128  | 2.077046636  | 0.037797255 | 0.097277032 |
| ENSG00000183098 | 203.1296161 | 0.171626272  | 0.132769857 | 1.29265992   | 0.196128706 | 0.347154729 |
| ENSG00000183114 | 117.21676   | 0.233810497  | 0.166286145 | 1.406073229  | 0.159702381 | 0.298435459 |
| ENSG00000183137 | 131.5324961 | 0.003727317  | 0.155003655 | 0.024046638  | 0.980815408 | 0.990179984 |
| ENSG00000183145 | 16.53283565 | -1.268519937 | 0.457836522 | -2.770683152 | 0.005593883 | 0.01967383  |
| ENSG00000183150 | 12.0872708  | -2.286364984 | 0.590636827 | -3.87101664  | 0.000108382 | 0.000619637 |
| ENSG00000183155 | 131.4446458 | 0.200406591  | 0.15697984  | 1.276639033  | 0.201729715 | 0.354212163 |
| ENSG00000183161 | 30.25543492 | -0.075078661 | 0.311269453 | -0.241201507 | 0.809398943 | 0.887420149 |
| ENSG00000183172 | 211.7346159 | 0.177146312  | 0.13412433  | 1.320761949  | 0.186580751 | 0.334768145 |
| ENSG00000183199 | 25.69230381 | 0.108452494  | 0.339216385 | 0.319714785  | 0.749184551 | 0.847736055 |
| ENSG00000183207 | 1120.903915 | 0.348551492  | 0.069663999 | 5.003323062  | 5.64E-07    | 5.27E-06    |
| ENSG00000183208 | 22.62824359 | -0.096163077 | 0.361999281 | -0.265644387 | 0.790513098 | 0.874908406 |
| ENSG00000183230 | 11.5279061  | -5.826101515 | 1.248594471 | -4.666127914 | 3.07E-06    | 2.45E-05    |
| ENSG00000183248 | 399.5162972 | -1.395883274 | 0.202112661 | -6.906461309 | 4.97E-12    | 9.08E-11    |
| ENSG00000183250 | 31.50088137 | -0.893596257 | 0.340101609 | -2.627439077 | 0.008603025 | 0.028447902 |
| ENSG00000183255 | 896.2546758 | 0.301257231  | 0.074148638 | 4.062882853  | 4.85E-05    | 0.000299676 |
| ENSG00000183258 | 866.8756029 | 0.388866279  | 0.081386053 | 4.778045698  | 1.77E-06    | 1.48E-05    |
| ENSG00000183283 | 826.5305721 | 0.322216896  | 0.084241926 | 3.824899436  | 0.000130825 | 0.000733615 |
| ENSG00000183291 | 228.5428812 | 0.138424437  | 0.124200026 | 1.114528247  | 0.265052633 | 0.431693045 |
| ENSG00000183307 | 9.597260658 | -0.483655951 | 0.57221578  | -0.845233508 | 0.397980477 | 0.566119672 |
| ENSG00000183309 | 196.4690705 | -0.14145698  | 0.14000974  | -1.010336705 | 0.312334001 | 0.483935111 |
| ENSG00000183317 | 6.756625467 | -2.432864356 | 0.803820529 | -3.026626302 | 0.002472995 | 0.00980473  |
| ENSG00000183323 | 104.8337676 | 0.391165141  | 0.17926584  | 2.182039487  | 0.029106619 | 0.078581717 |
| ENSG00000183337 | 845.9814833 | -0.300037595 | 0.078756255 | -3.809698612 | 0.000139136 | 0.000775574 |
| ENSG00000183340 | 44.21999897 | 0.053470431  | 0.260689796 | 0.205111331  | 0.837485144 | 0.905074151 |
| ENSG00000183346 | 9.757238933 | 0.28576874   | 0.565080195 | 0.505713601  | 0.613057719 | 0.74838114  |
| ENSG00000183354 | 417.2131731 | -0.055253719 | 0.097861839 | -0.564609451 | 0.572339435 | 0.717377715 |
| ENSG00000183386 | 340.5965013 | 0.188592193  | 0.112762494 | 1.672472707  | 0.094431145 | 0.200616198 |
| ENSG00000183401 | 17.97638292 | 0.630072078  | 0.419296279 | 1.50268941   | 0.132919155 | 0.261171544 |
| ENSG00000183426 | 8.111082116 | -0.020043673 | 0.606465725 | -0.033049968 | 0.973634741 | 0.986408007 |
| ENSG00000183431 | 814.5354625 | -0.076607646 | 0.078538445 | -0.975415867 | 0.329354016 | 0.501837061 |
| ENSG00000183474 | 51.9977308  | 0.19853245   | 0.253877526 | 0.782000884  | 0.434214054 | 0.600453319 |
| ENSG00000183475 | 112.5184628 | -0.146912305 | 0.167847184 | -0.875274176 | 0.381424742 | 0.550886667 |
| ENSG00000183495 | 2219.81654  | 0.006548881  | 0.061179159 | 0.107044315  | 0.914753824 | 0.953830969 |
| ENSG00000183496 | 137.4335607 | 0.372356242  | 0.16159664  | 2.304232572  | 0.021209592 | 0.060616711 |
| ENSG00000183506 | 29.66307107 | -0.483520501 | 0.322331812 | -1.500070684 | 0.133596094 | 0.261988598 |
| ENSG00000183513 | 106.104569  | -0.609020014 | 0.189907324 | -3.206932744 | 0.001341584 | 0.005800315 |
| ENSG00000183520 | 550.3595051 | 0.224285209  | 0.094163049 | 2.381881332  | 0.017224447 | 0.051152602 |
| ENSG00000183527 | 269.3777557 | 0.285372222  | 0.128369512 | 2.223052939  | 0.02621223  | 0.072168405 |



|                 |             |              |             |              |             |             |
|-----------------|-------------|--------------|-------------|--------------|-------------|-------------|
| ENSG00000183530 | 1098.223363 | -0.164618818 | 0.072543808 | -2.269233212 | 0.023254148 | 0.065264937 |
| ENSG00000183569 | 12.68786908 | -0.128756234 | 0.482457372 | -0.266875877 | 0.789564731 | 0.874348005 |
| ENSG00000183571 | 202.608786  | -0.206271232 | 0.149554424 | -1.379238588 | 0.167821204 | 0.310059773 |
| ENSG00000183576 | 254.3459854 | -0.337186865 | 0.120871346 | -2.789634409 | 0.005276759 | 0.018736762 |
| ENSG00000183579 | 247.6138616 | -0.041867396 | 0.12008726  | -0.348641447 | 0.727358508 | 0.831595187 |
| ENSG00000183580 | 48.52639645 | -2.621915784 | 0.31112832  | -8.427120301 | 3.54E-17    | 9.89E-16    |
| ENSG00000183597 | 109.7592687 | 0.412881927  | 0.16939943  | 2.43732772   | 0.014796263 | 0.044987685 |
| ENSG00000183598 | 76.31116725 | -0.417804749 | 0.39017255  | -1.070820459 | 0.284250166 | 0.453798699 |
| ENSG00000183605 | 192.1829661 | 0.207526742  | 0.134140726 | 1.547082292  | 0.121843403 | 0.244854691 |
| ENSG00000183617 | 87.24726326 | 0.194517734  | 0.199766167 | 0.973727119  | 0.330192049 | 0.50245994  |
| ENSG00000183621 | 28.27942472 | 0.197540744  | 0.341599862 | 0.578281099  | 0.563074353 | 0.709181874 |
| ENSG00000183624 | 239.1759496 | -0.047450051 | 0.126968882 | -0.373714018 | 0.708617095 | 0.817505283 |
| ENSG00000183647 | 20.70173664 | 0.344555493  | 0.380357917 | 0.905871751  | 0.365003738 | 0.5362066   |
| ENSG00000183648 | 443.8044984 | 0.079371195  | 0.098009695 | 0.809830034  | 0.418037868 | 0.58598722  |
| ENSG00000183655 | 81.67863722 | -0.050628101 | 0.201122464 | -0.25172773  | 0.801251521 | 0.881445698 |
| ENSG00000183665 | 88.64093468 | -0.194331916 | 0.195599633 | -0.993518819 | 0.320457184 | 0.49212442  |
| ENSG00000183684 | 1136.140667 | 0.244015834  | 0.075268369 | 3.241943964  | 0.001187174 | 0.005210842 |
| ENSG00000183688 | 320.3773796 | 0.323744414  | 0.107581998 | 3.00928056   | 0.002618672 | 0.010280738 |
| ENSG00000183696 | 104.1088607 | -0.791113418 | 0.177183477 | -4.464939006 | 8.01E-06    | 5.87E-05    |
| ENSG00000183718 | 49.41037876 | -0.384824407 | 0.252025743 | -1.526925    | 0.126779662 | 0.251998573 |
| ENSG00000183722 | 14.80035207 | 0.10257487   | 0.467250916 | 0.219528451  | 0.82623842  | 0.898391554 |
| ENSG00000183723 | 423.5039292 | -0.407725809 | 0.097404155 | -4.185918031 | 2.84E-05    | 0.000184531 |
| ENSG00000183726 | 228.1258731 | 0.178930728  | 0.123539596 | 1.448367435  | 0.147514317 | 0.281752149 |
| ENSG00000183735 | 323.1012472 | 0.300626925  | 0.108524062 | 2.770140738  | 0.005603208 | 0.019681985 |
| ENSG00000183741 | 1666.138192 | 0.617825948  | 0.08823157  | 7.002322968  | 2.52E-12    | 4.81E-11    |
| ENSG00000183751 | 255.4096054 | 0.115403326  | 0.126449792 | 0.912641486  | 0.361431128 | 0.532405941 |
| ENSG00000183762 | 96.12919064 | -0.081869663 | 0.185280966 | -0.441867639 | 0.658584989 | 0.781412564 |
| ENSG00000183763 | 118.32182   | -0.065420862 | 0.163094357 | -0.401122781 | 0.688329729 | 0.803737964 |
| ENSG00000183765 | 262.8369958 | 0.124371251  | 0.122254407 | 1.017315068  | 0.309003571 | 0.480151898 |
| ENSG00000183770 | 185.3959618 | 0.309597904  | 0.134875461 | 2.295435367  | 0.021708186 | 0.061727712 |
| ENSG00000183779 | 168.4341631 | 0.633295052  | 0.149540236 | 4.234947518  | 2.29E-05    | 0.000151687 |
| ENSG00000183793 | 19.3245321  | 0.240120767  | 0.39561262  | 0.606959321  | 0.543877908 | 0.692768678 |
| ENSG00000183801 | 41.06463286 | -0.944200109 | 0.286475084 | -3.29592402  | 0.000980985 | 0.00441522  |
| ENSG00000183808 | 465.9299021 | 0.075874987  | 0.099312625 | 0.764001423  | 0.444866395 | 0.609959809 |
| ENSG00000183814 | 286.7972989 | -0.002241513 | 0.110327182 | -0.020316956 | 0.983790529 | 0.991961125 |
| ENSG00000183826 | 176.9243758 | 0.17790955   | 0.137411398 | 1.294721926  | 0.195416174 | 0.346545487 |
| ENSG00000183828 | 219.5838642 | 0.638200133  | 0.126299863 | 5.053054834  | 4.35E-07    | 4.15E-06    |
| ENSG00000183837 | 102.246551  | 0.013896184  | 0.179826058 | 0.077275697  | 0.938404224 | 0.966102042 |
| ENSG00000183853 | 553.0893679 | 0.345511466  | 0.088622066 | 3.898706968  | 9.67E-05    | 0.000558248 |
| ENSG00000183856 | 349.6869213 | -0.488367478 | 0.114541726 | -4.263664399 | 2.01E-05    | 0.000135097 |
| ENSG00000183864 | 588.7617381 | -0.091318293 | 0.090848942 | -1.005166278 | 0.31481679  | 0.486226658 |
| ENSG00000183873 | 41.06099882 | 0.430858388  | 0.272656041 | 1.58022682   | 0.114054932 | 0.2321927   |
| ENSG00000183891 | 28.63178769 | -0.549011465 | 0.329726457 | -1.6650513   | 0.095902522 | 0.203097048 |
| ENSG00000183935 | 31.15283612 | -0.278156754 | 0.311785891 | -0.892140287 | 0.372317744 | 0.54287242  |
| ENSG00000183943 | 342.9978605 | 0.270913461  | 0.108562206 | 2.495467531  | 0.012579127 | 0.039205457 |
| ENSG00000183955 | 417.2884444 | 0.671315978  | 0.098685014 | 6.802613158  | 1.03E-11    | 1.82E-10    |
| ENSG00000183963 | 220.7614841 | -0.062857803 | 0.138692844 | -0.453215908 | 0.650393279 | 0.775087119 |
| ENSG00000183971 | 312.6188937 | 6.06781425   | 0.282441696 | 21.48342239  | 2.22E-102   | 6.13E-100   |
| ENSG00000183978 | 153.0490748 | 0.156914485  | 0.154808495 | 1.013603841  | 0.310771824 | 0.48215284  |
| ENSG00000184007 | 1193.692711 | -0.350272222 | 0.068064357 | -5.146191584 | 2.66E-07    | 2.62E-06    |

|                 |             |              |             |              |             |             |
|-----------------|-------------|--------------|-------------|--------------|-------------|-------------|
| ENSG00000184009 | 10623.58918 | 0.030915787  | 0.058100543 | 0.5321084    | 0.59465092  | 0.734702534 |
| ENSG00000184014 | 777.8567482 | 0.075551416  | 0.0833327   | 0.906623881  | 0.364605729 | 0.535733962 |
| ENSG00000184047 | 53.04596514 | 0.139274206  | 0.245156492 | 0.568103276  | 0.569964843 | 0.715039399 |
| ENSG00000184058 | 764.2179306 | 0.394626563  | 0.09036169  | 4.367188807  | 1.26E-05    | 8.82E-05    |
| ENSG00000184060 | 12.07734475 | -1.310199288 | 0.540899196 | -2.422261479 | 0.015424248 | 0.046634612 |
| ENSG00000184076 | 417.3006115 | 0.197148037  | 0.112808443 | 1.747635486  | 0.080527167 | 0.177465502 |
| ENSG00000184083 | 54.44573404 | -0.17452297  | 0.238852703 | -0.730671948 | 0.464979554 | 0.627552632 |
| ENSG00000184117 | 968.6443555 | -0.383830145 | 0.0812629   | -4.723313411 | 2.32E-06    | 1.91E-05    |
| ENSG00000184160 | 46.61228    | 1.905688456  | 0.287782586 | 6.621972785  | 3.54E-11    | 5.93E-10    |
| ENSG00000184162 | 163.9174029 | 0.304602622  | 0.145172896 | 2.098205861  | 0.035886964 | 0.093387215 |
| ENSG00000184163 | 42.78946236 | 2.149691677  | 0.303738495 | 7.077442305  | 1.47E-12    | 2.88E-11    |
| ENSG00000184164 | 380.075937  | 0.96218631   | 0.103410102 | 9.304567827  | 1.35E-20    | 4.68E-19    |
| ENSG00000184178 | 55.97812161 | 0.307600267  | 0.23631796  | 1.301637279  | 0.19304041  | 0.343767576 |
| ENSG00000184182 | 37.32209437 | -0.632496763 | 0.291998104 | -2.166098868 | 0.030303633 | 0.08115827  |
| ENSG00000184185 | 99.40664527 | -0.132479329 | 0.184900231 | -0.71649088  | 0.473688297 | 0.634892679 |
| ENSG00000184203 | 324.3144138 | -0.375649905 | 0.112518293 | -3.338567412 | 0.000842116 | 0.003851906 |
| ENSG00000184205 | 631.3975705 | -0.214325808 | 0.086736334 | -2.471003759 | 0.01347344  | 0.04153202  |
| ENSG00000184207 | 541.3796524 | 0.275625511  | 0.088631617 | 3.109787685  | 0.001872219 | 0.007737292 |
| ENSG00000184208 | 191.0967674 | 0.045537989  | 0.135191072 | 0.336841691  | 0.736236243 | 0.837783014 |
| ENSG00000184209 | 255.1558344 | 0.355791225  | 0.118186888 | 3.010412001  | 0.002608935 | 0.010251109 |
| ENSG00000184216 | 1106.085267 | 1.146716754  | 0.081549405 | 14.06162007  | 6.54E-45    | 5.85E-43    |
| ENSG00000184220 | 282.9421535 | 0.109434661  | 0.112716731 | 0.970882139  | 0.331606974 | 0.504073644 |
| ENSG00000184226 | 290.6384994 | -0.731566197 | 0.115929153 | -6.310459279 | 2.78E-10    | 4.15E-09    |
| ENSG00000184232 | 316.3820798 | -0.093279463 | 0.110749604 | -0.842255496 | 0.399644956 | 0.567854815 |
| ENSG00000184254 | 96.63422294 | -0.767341602 | 0.198005475 | -3.875355478 | 0.000106469 | 0.000610936 |
| ENSG00000184260 | 1087.653233 | -0.167568947 | 0.210485734 | -0.796105961 | 0.425970449 | 0.593199852 |
| ENSG00000184270 | 893.7095467 | -0.220135528 | 0.089277657 | -2.46574044  | 0.013673037 | 0.042036585 |
| ENSG00000184271 | 100.5646224 | 0.751659682  | 0.181424278 | 4.143104176  | 3.43E-05    | 0.000218859 |
| ENSG00000184277 | 123.9248531 | 0.411282154  | 0.160454336 | 2.563234901  | 0.010370186 | 0.033311229 |
| ENSG00000184281 | 162.4264009 | 0.36982908   | 0.161708817 | 2.287006278  | 0.022195457 | 0.062694466 |
| ENSG00000184302 | 15.81737738 | -2.160309489 | 0.507896544 | -4.253443962 | 2.11E-05    | 0.000140743 |
| ENSG00000184304 | 83.21369138 | -0.569204424 | 0.199946313 | -2.846786304 | 0.0044163   | 0.01612156  |
| ENSG00000184305 | 374.4271992 | -2.090915922 | 0.12332105  | -16.955061   | 1.77E-64    | 2.56E-62    |
| ENSG00000184307 | 136.1482556 | 0.946689686  | 0.165754939 | 5.711381475  | 1.12E-08    | 1.37E-07    |
| ENSG00000184349 | 607.4742693 | 0.263387962  | 0.091167665 | 2.889050222  | 0.003864074 | 0.014355631 |
| ENSG00000184363 | 17.41969096 | -0.639933912 | 0.426407534 | -1.500756579 | 0.133418533 | 0.261750019 |
| ENSG00000184368 | 510.0102441 | 0.217656903  | 0.0995801   | 2.185746989  | 0.028834121 | 0.077995937 |
| ENSG00000184371 | 62.17675533 | 0.019364727  | 0.221342869 | 0.087487467  | 0.930284047 | 0.962133707 |
| ENSG00000184378 | 24.20192725 | -0.095704631 | 0.349735209 | -0.273648831 | 0.784354504 | 0.871011269 |
| ENSG00000184381 | 62.87456609 | 0.332593296  | 0.241116667 | 1.379387414  | 0.167775338 | 0.310056594 |
| ENSG00000184384 | 187.0802172 | 2.051912995  | 0.154588844 | 13.27335749  | 3.30E-40    | 2.61E-38    |
| ENSG00000184402 | 171.7189631 | -0.160761015 | 0.139129496 | -1.155477597 | 0.247894902 | 0.412129074 |
| ENSG00000184408 | 16.08338095 | -4.128999192 | 0.7415429   | -5.568119109 | 2.58E-08    | 2.98E-07    |
| ENSG00000184428 | 1067.623542 | 0.3007527    | 0.075645357 | 3.975824987  | 7.01E-05    | 0.000418342 |
| ENSG00000184432 | 1080.469411 | 0.040410602  | 0.072897045 | 0.554351711  | 0.579338167 | 0.722635356 |
| ENSG00000184436 | 175.2075136 | -0.089458299 | 0.14671459  | -0.609743713 | 0.542031593 | 0.691497292 |
| ENSG00000184441 | 26.39777256 | -0.269233533 | 0.349128042 | -0.771159863 | 0.440612181 | 0.60586547  |
| ENSG00000184445 | 555.6780552 | -0.743708401 | 0.089049772 | -8.351603679 | 6.73E-17    | 1.85E-15    |
| ENSG00000184451 | 80.69750802 | -0.672873476 | 0.211152661 | -3.186668232 | 0.001439218 | 0.006167386 |
| ENSG00000184465 | 213.3990867 | -0.749421963 | 0.145588316 | -5.147541953 | 2.64E-07    | 2.61E-06    |

|                 |             |              |             |              |             |             |
|-----------------|-------------|--------------|-------------|--------------|-------------|-------------|
| ENSG00000184470 | 281.1496428 | -0.199106671 | 0.112100874 | -1.776138437 | 0.075710102 | 0.168782702 |
| ENSG00000184481 | 31.86514631 | 0.584074253  | 0.31169692  | 1.873853141  | 0.06095067  | 0.142648127 |
| ENSG00000184489 | 220.8642657 | 0.040953442  | 0.140787303 | 0.290888746  | 0.771136409 | 0.863277474 |
| ENSG00000184497 | 14.36219592 | 1.850590101  | 0.497739798 | 3.717987002  | 0.000200817 | 0.001074208 |
| ENSG00000184500 | 190.492666  | -0.666208801 | 0.142303283 | -4.681612301 | 2.85E-06    | 2.29E-05    |
| ENSG00000184508 | 145.5021187 | 0.489363261  | 0.158443444 | 3.088567421  | 0.002011241 | 0.008215148 |
| ENSG00000184517 | 111.8505862 | 0.126655389  | 0.170921701 | 0.741014093  | 0.458684895 | 0.622312879 |
| ENSG00000184524 | 64.13369563 | 0.013228952  | 0.21835206  | 0.060585425  | 0.951689382 | 0.973475269 |
| ENSG00000184557 | 60.49831407 | -0.834369341 | 0.237816482 | -3.508458855 | 0.000450711 | 0.002208279 |
| ENSG00000184564 | 14.49463196 | 0.502809813  | 0.469506855 | 1.070931782  | 0.284200104 | 0.453798699 |
| ENSG00000184575 | 2112.120272 | 0.169474739  | 0.060130371 | 2.818454922  | 0.004825539 | 0.017358346 |
| ENSG00000184602 | 106.0984644 | -0.093088597 | 0.176426068 | -0.527635164 | 0.597752582 | 0.736869725 |
| ENSG00000184613 | 96.73437812 | 0.063465029  | 0.185130757 | 0.342811916  | 0.731739961 | 0.834585192 |
| ENSG00000184619 | 38.39713098 | -0.845636654 | 0.285540629 | -2.961528303 | 0.003061164 | 0.011742715 |
| ENSG00000184634 | 560.2319641 | 0.215943402  | 0.090159703 | 2.395121039  | 0.016614879 | 0.049636157 |
| ENSG00000184640 | 2363.845935 | 0.053723903  | 0.059630717 | 0.900943438  | 0.367618394 | 0.539032941 |
| ENSG00000184661 | 261.1229047 | -0.233256134 | 0.116428286 | -2.003431839 | 0.045130957 | 0.11246311  |
| ENSG00000184675 | 165.9256589 | 0.02278196   | 0.143801529 | 0.158426413  | 0.874120802 | 0.93021022  |
| ENSG00000184677 | 577.4453696 | 0.113456394  | 0.084477552 | 1.343036002  | 0.179260317 | 0.325121971 |
| ENSG00000184678 | 4974.483919 | -0.161826272 | 0.066507221 | -2.433213567 | 0.014965471 | 0.045423503 |
| ENSG00000184697 | 25.86892883 | -4.538970163 | 0.655501891 | -6.924419632 | 4.38E-12    | 8.10E-11    |
| ENSG00000184702 | 21.46069866 | 0.193780522  | 0.40141376  | 0.482745091  | 0.629276742 | 0.759664008 |
| ENSG00000184708 | 306.1071137 | -0.042853859 | 0.11012821  | -0.389126989 | 0.69718221  | 0.810027539 |
| ENSG00000184719 | 6.771799967 | -4.122257393 | 1.126270531 | -3.660095224 | 0.000252122 | 0.001316073 |
| ENSG00000184743 | 431.9599026 | 0.356261244  | 0.098098452 | 3.63167039   | 0.000281593 | 0.00145424  |
| ENSG00000184752 | 479.2840698 | 0.033644024  | 0.100928    | 0.333346782  | 0.73887253  | 0.840132657 |
| ENSG00000184786 | 11.85715028 | 0.287482749  | 0.506656451 | 0.567411602  | 0.570434569 | 0.715500883 |
| ENSG00000184787 | 845.2775354 | 0.068391338  | 0.079933073 | 0.855607509  | 0.392214915 | 0.560529343 |
| ENSG00000184792 | 84.6860715  | 0.212567867  | 0.193183834 | 1.100339825  | 0.271184086 | 0.438811526 |
| ENSG00000184831 | 78.16622783 | 0.2240902    | 0.202937541 | 1.104232365  | 0.269492354 | 0.436728091 |
| ENSG00000184838 | 9.284513228 | -5.51052749  | 1.261784791 | -4.367248306 | 1.26E-05    | 8.82E-05    |
| ENSG00000184840 | 542.1039614 | 0.499783799  | 0.103108539 | 4.847162056  | 1.25E-06    | 1.09E-05    |
| ENSG00000184857 | 42.82986434 | -0.097848625 | 0.263507991 | -0.371330771 | 0.710391181 | 0.818634554 |
| ENSG00000184863 | 1651.738345 | 0.50206969   | 0.062974258 | 7.972617806  | 1.55E-15    | 3.90E-14    |
| ENSG00000184867 | 215.4233427 | 0.136577029  | 0.140674401 | 0.970873364  | 0.331611344 | 0.504073644 |
| ENSG00000184897 | 508.9260014 | 0.775891026  | 0.242901887 | 3.194256893  | 0.001401913 | 0.006027754 |
| ENSG00000184898 | 62.08076322 | -0.457425371 | 0.245246798 | -1.865163477 | 0.062158493 | 0.144847438 |
| ENSG00000184900 | 299.3960306 | 0.340236045  | 0.111241468 | 3.058536094  | 0.002224213 | 0.008942049 |
| ENSG00000184903 | 86.31610422 | 0.880751981  | 0.192752882 | 4.569332348  | 4.89E-06    | 3.75E-05    |
| ENSG00000184916 | 339.0697306 | 0.779670127  | 0.11087097  | 7.032229661  | 2.03E-12    | 3.93E-11    |
| ENSG00000184922 | 41.48544425 | -0.586013723 | 0.272985592 | -2.146683707 | 0.031818471 | 0.084394648 |
| ENSG00000184924 | 291.9415067 | 0.455617046  | 0.113213181 | 4.024416946  | 5.71E-05    | 0.000346288 |
| ENSG00000184925 | 9.595753425 | -1.360791768 | 0.624055924 | -2.180560612 | 0.029215931 | 0.078781864 |
| ENSG00000184933 | 8.429773516 | -1.489207617 | 0.652970636 | -2.280665523 | 0.022568247 | 0.063619539 |
| ENSG00000184939 | 107.9456433 | -0.169137252 | 0.169490745 | -0.99791438  | 0.318320878 | 0.48997802  |
| ENSG00000184949 | 52.13008125 | -0.312949679 | 0.249743844 | -1.253082656 | 0.210175627 | 0.365252634 |
| ENSG00000184967 | 122.6350758 | 0.863660135  | 0.168337445 | 5.130528941  | 2.89E-07    | 2.83E-06    |
| ENSG00000184979 | 43.62947979 | 0.989213577  | 0.278766148 | 3.548542684  | 0.000387369 | 0.00193025  |
| ENSG00000184983 | 750.339863  | 0.104635956  | 0.092845667 | 1.12698803   | 0.259747542 | 0.425948368 |
| ENSG00000184986 | 59.39396034 | 0.302230086  | 0.225891586 | 1.337943083  | 0.180914991 | 0.327507088 |

|                 |             |              |             |              |             |             |
|-----------------|-------------|--------------|-------------|--------------|-------------|-------------|
| ENSG00000184990 | 530.4991889 | 0.241396723  | 0.091206588 | 2.646702689  | 0.008128078 | 0.027108334 |
| ENSG00000184992 | 729.1988877 | -0.013568607 | 0.086504165 | -0.156854952 | 0.875359163 | 0.931034312 |
| ENSG00000185000 | 112.9530405 | 0.339820518  | 0.176933002 | 1.920616928  | 0.054780019 | 0.131067098 |
| ENSG00000185008 | 191.9347312 | 5.315643924  | 0.280643571 | 18.94090754  | 5.25E-80    | 9.70E-78    |
| ENSG00000185009 | 525.3497936 | 0.442711605  | 0.09400081  | 4.709657318  | 2.48E-06    | 2.03E-05    |
| ENSG00000185010 | 18.29048477 | -0.680933633 | 0.409499024 | -1.66284556  | 0.096343354 | 0.203737267 |
| ENSG00000185015 | 18.97655628 | -1.599177885 | 0.468119755 | -3.416172607 | 0.00063508  | 0.002997684 |
| ENSG00000185019 | 30.87088445 | -0.022956901 | 0.312907516 | -0.073366409 | 0.941514547 | 0.967676806 |
| ENSG00000185022 | 101.2721687 | 0.357962258  | 0.194230125 | 1.842980111  | 0.065331914 | 0.150717261 |
| ENSG00000185024 | 272.7568325 | -0.048032406 | 0.130596559 | -0.367792277 | 0.713028128 | 0.820852564 |
| ENSG00000185033 | 312.5507481 | -0.591812327 | 0.112786252 | -5.247202723 | 1.54E-07    | 1.58E-06    |
| ENSG00000185043 | 295.0588055 | 0.126482255  | 0.112111229 | 1.128185424  | 0.259241618 | 0.425317334 |
| ENSG00000185046 | 45.31822203 | 3.150122558  | 0.338493065 | 9.306313432  | 1.32E-20    | 4.61E-19    |
| ENSG00000185049 | 471.4968643 | 0.41304637   | 0.092551932 | 4.462860579  | 8.09E-06    | 5.92E-05    |
| ENSG00000185053 | 34.90733946 | -5.981126113 | 0.868546527 | -6.886362361 | 5.72E-12    | 1.04E-10    |
| ENSG00000185070 | 37.74293144 | -3.325588368 | 0.405186113 | -8.207557613 | 2.26E-16    | 6.01E-15    |
| ENSG00000185085 | 99.26291176 | -0.092055427 | 0.186825642 | -0.492734437 | 0.622200242 | 0.754883986 |
| ENSG00000185088 | 481.2530756 | 0.142128334  | 0.09192362  | 1.546156847  | 0.122066692 | 0.245233242 |
| ENSG00000185090 | 202.7114669 | 0.102887351  | 0.137247211 | 0.749649845  | 0.453465622 | 0.617471073 |
| ENSG00000185100 | 45.75891047 | -0.563676889 | 0.267580297 | -2.106570985 | 0.035154784 | 0.091753856 |
| ENSG00000185104 | 280.7462922 | -0.487015907 | 0.122959484 | -3.960783586 | 7.47E-05    | 0.0004426   |
| ENSG00000185112 | 36.88381594 | -0.226719666 | 0.293054881 | -0.773642346 | 0.439142323 | 0.604471554 |
| ENSG00000185115 | 189.571591  | 0.062880585  | 0.137803253 | 0.456306971  | 0.648169252 | 0.773694211 |
| ENSG00000185122 | 688.3864487 | 0.35997388   | 0.086876423 | 4.143516341  | 3.42E-05    | 0.000218579 |
| ENSG00000185127 | 226.3760649 | 0.152379995  | 0.125477095 | 1.21440487   | 0.224593157 | 0.382778461 |
| ENSG00000185129 | 375.8953476 | -0.253580376 | 0.105657664 | -2.400018753 | 0.016394232 | 0.049078207 |
| ENSG00000185130 | 641.2661827 | -0.149119887 | 0.085331413 | -1.747538008 | 0.080544058 | 0.177474883 |
| ENSG00000185133 | 31.09926428 | -1.642811541 | 0.343202128 | -4.786717231 | 1.70E-06    | 1.43E-05    |
| ENSG00000185158 | 91.00736885 | 0.243261349  | 0.183823417 | 1.323342546  | 0.185721489 | 0.333706249 |
| ENSG00000185163 | 303.5369115 | 0.362072402  | 0.12291562  | 2.945698873  | 0.003222259 | 0.012279728 |
| ENSG00000185164 | 151.2996274 | 0.319089286  | 0.146287687 | 2.181245005  | 0.0291653   | 0.078694768 |
| ENSG00000185187 | 341.7014605 | -0.67003519  | 0.10920044  | -6.135828675 | 8.47E-10    | 1.19E-08    |
| ENSG00000185189 | 174.1479311 | 0.240988306  | 0.144674924 | 1.665722702  | 0.095768658 | 0.202997185 |
| ENSG00000185201 | 60.7372433  | -0.186858586 | 0.2319975   | -0.805433621 | 0.420569497 | 0.588244521 |
| ENSG00000185215 | 77.54508985 | 0.935902398  | 0.21214584  | 4.411599114  | 1.03E-05    | 7.34E-05    |
| ENSG00000185219 | 782.8151975 | -0.187090374 | 0.078531552 | -2.382359328 | 0.017202103 | 0.051111459 |
| ENSG00000185220 | 56.45089512 | 0.021680508  | 0.254888427 | 0.085058816  | 0.932214631 | 0.96324653  |
| ENSG00000185222 | 376.235151  | 0.409984504  | 0.107907663 | 3.799401199  | 0.000145046 | 0.00080405  |
| ENSG00000185236 | 730.5431408 | -0.189635069 | 0.096795729 | -1.959126405 | 0.050097985 | 0.122047589 |
| ENSG00000185238 | 260.4124416 | 0.225538174  | 0.116147685 | 1.941822374  | 0.052158607 | 0.126083627 |
| ENSG00000185246 | 324.7173708 | 0.314329612  | 0.115431519 | 2.723083032  | 0.00646758  | 0.022241781 |
| ENSG00000185250 | 42.28915597 | -1.188226543 | 0.28568305  | -4.159247613 | 3.19E-05    | 0.000205459 |
| ENSG00000185252 | 182.8096435 | 0.331699083  | 0.146846277 | 2.258818466  | 0.023894679 | 0.066742605 |
| ENSG00000185262 | 346.1378274 | -0.270236071 | 0.10439832  | -2.588509769 | 0.009639221 | 0.031314094 |
| ENSG00000185272 | 10.65359598 | 0.515844802  | 0.55893564  | 0.922905546  | 0.35605643  | 0.527308874 |
| ENSG00000185278 | 380.4656518 | -0.109662157 | 0.100845596 | -1.087426332 | 0.276848439 | 0.445411754 |
| ENSG00000185298 | 664.2029469 | 0.35361274   | 0.08434771  | 4.192321769  | 2.76E-05    | 0.000179813 |
| ENSG00000185305 | 50.65657312 | -0.201521798 | 0.247528959 | -0.814134227 | 0.41556806  | 0.583340116 |
| ENSG00000185324 | 440.186045  | 0.34611993   | 0.100262793 | 3.452127371  | 0.000556185 | 0.002662646 |
| ENSG00000185332 | 11.28960649 | 0.706991181  | 0.580525703 | 1.217846474  | 0.22328232  | 0.381655725 |

|                 |             |              |             |              |             |             |
|-----------------|-------------|--------------|-------------|--------------|-------------|-------------|
| ENSG00000185339 | 35.39780306 | 0.671490587  | 0.303275534 | 2.214127131  | 0.026820035 | 0.073567863 |
| ENSG00000185340 | 596.4267118 | 0.602261554  | 0.097445939 | 6.180468446  | 6.39E-10    | 9.15E-09    |
| ENSG00000185344 | 287.2457025 | 0.383417493  | 0.116632289 | 3.287404336  | 0.001011155 | 0.004539373 |
| ENSG00000185345 | 25.30499389 | -0.706566063 | 0.358095902 | -1.973119658 | 0.048481931 | 0.119099371 |
| ENSG00000185347 | 75.8798797  | 0.027596885  | 0.223727299 | 0.123350549  | 0.901829514 | 0.947140126 |
| ENSG00000185359 | 1174.711244 | 0.510489485  | 0.084935524 | 6.010317739  | 1.85E-09    | 2.50E-08    |
| ENSG00000185361 | 245.7635461 | -0.060580154 | 0.119545667 | -0.506753237 | 0.612327972 | 0.747774297 |
| ENSG00000185379 | 155.9820951 | 0.275253234  | 0.150830474 | 1.824917909  | 0.068013418 | 0.155625425 |
| ENSG00000185386 | 23.48638019 | -1.290532675 | 0.37562025  | -3.435737757 | 0.000590943 | 0.002813889 |
| ENSG00000185414 | 264.3204578 | -0.091366097 | 0.11550393  | -0.791021545 | 0.428931419 | 0.595858127 |
| ENSG00000185418 | 111.2456875 | -0.41473968  | 0.176210079 | -2.353666045 | 0.018589303 | 0.054376477 |
| ENSG00000185420 | 190.0227811 | 0.042708851  | 0.140417618 | 0.304155931  | 0.761009097 | 0.855602272 |
| ENSG00000185432 | 108.9276092 | 0.573933785  | 0.173497814 | 3.308017391  | 0.00093959  | 0.004253438 |
| ENSG00000185436 | 24.64210011 | -0.419374944 | 0.349611593 | -1.199545301 | 0.230315981 | 0.389554315 |
| ENSG00000185437 | 47.43865823 | -1.796575838 | 0.287060364 | -6.258529777 | 3.89E-10    | 5.72E-09    |
| ENSG00000185442 | 16.36527398 | -1.184197018 | 0.445119244 | -2.660404003 | 0.007804697 | 0.026177789 |
| ENSG00000185453 | 274.6542061 | 0.734211529  | 0.266747762 | 2.752456187  | 0.005915006 | 0.020612277 |
| ENSG00000185475 | 221.1238247 | 0.379794022  | 0.134284564 | 2.828277589  | 0.004679921 | 0.016921196 |
| ENSG00000185477 | 32.84646126 | -0.629995996 | 0.328201129 | -1.919542442 | 0.05491572  | 0.131369401 |
| ENSG00000185480 | 120.0948879 | 0.000942586  | 0.163848313 | 0.005752796  | 0.995409958 | 0.997940364 |
| ENSG00000185482 | 9.898799011 | -0.171793511 | 0.549816005 | -0.312456366 | 0.754693719 | 0.851673232 |
| ENSG00000185483 | 8.541572608 | -1.548754651 | 0.639878199 | -2.420389776 | 0.015503879 | 0.046865286 |
| ENSG00000185499 | 38.55105337 | -0.046643738 | 0.308902678 | -0.150998167 | 0.879977162 | 0.934004754 |
| ENSG00000185504 | 352.9818405 | 0.154363655  | 0.109259732 | 1.412813782  | 0.157710485 | 0.295854591 |
| ENSG00000185513 | 78.90595518 | 0.092844359  | 0.202504369 | 0.458480769  | 0.646607076 | 0.77242024  |
| ENSG00000185515 | 228.6676538 | 0.099185711  | 0.124520461 | 0.796541464  | 0.425717385 | 0.592965008 |
| ENSG00000185532 | 1380.364084 | -1.714868651 | 0.070364106 | -24.37135572 | 3.44E-131   | 1.34E-128   |
| ENSG00000185551 | 11.08927967 | -0.241343021 | 0.509617236 | -0.473577038 | 0.635801553 | 0.764911306 |
| ENSG00000185559 | 22.78827809 | -4.371313501 | 0.669491407 | -6.529304867 | 6.61E-11    | 1.08E-09    |
| ENSG00000185561 | 98.06571453 | -0.409725986 | 0.197757638 | -2.071859221 | 0.038278572 | 0.0982925   |
| ENSG00000185567 | 214.2866934 | -0.72635653  | 0.130305437 | -5.574261122 | 2.49E-08    | 2.89E-07    |
| ENSG00000185585 | 19.01246528 | -1.876432917 | 0.449019004 | -4.178961022 | 2.93E-05    | 0.000189566 |
| ENSG00000185591 | 1565.226374 | -0.040528016 | 0.079960538 | -0.506850216 | 0.612259919 | 0.747774297 |
| ENSG00000185608 | 74.90057181 | 0.136023368  | 0.208210567 | 0.653297138  | 0.513564737 | 0.669454701 |
| ENSG00000185615 | 17.95545475 | 1.762348268  | 0.457533903 | 3.851841925  | 0.000117233 | 0.00066563  |
| ENSG00000185619 | 309.9366571 | -0.15072207  | 0.114151846 | -1.320364721 | 0.186713277 | 0.334920367 |
| ENSG00000185621 | 109.556299  | 0.07356336   | 0.176866159 | 0.415926711  | 0.677463633 | 0.795306274 |
| ENSG00000185624 | 6695.786513 | 0.610678522  | 0.059148822 | 10.32444103  | 5.46E-25    | 2.44E-23    |
| ENSG00000185627 | 235.7300742 | -0.343229778 | 0.121258039 | -2.830573383 | 0.004646465 | 0.016830556 |
| ENSG00000185630 | 430.0678113 | -0.870895228 | 0.099252443 | -8.774547055 | 1.72E-18    | 5.40E-17    |
| ENSG00000185633 | 8.111013013 | -1.425646807 | 0.643208082 | -2.216462832 | 0.026659821 | 0.073199863 |
| ENSG00000185634 | 15.78156416 | -0.121211779 | 0.434474217 | -0.278984977 | 0.780256354 | 0.868470711 |
| ENSG00000185650 | 915.5505115 | -0.486899342 | 0.078000847 | -6.242231497 | 4.31E-10    | 6.31E-09    |
| ENSG00000185651 | 415.1741137 | -0.001953588 | 0.09665299  | -0.020212395 | 0.98387394  | 0.991961125 |
| ENSG00000185658 | 799.9970429 | -0.112118859 | 0.08349323  | -1.342849704 | 0.179320645 | 0.325189402 |
| ENSG00000185670 | 36.67771558 | 0.054428323  | 0.290178163 | 0.187568637  | 0.851214814 | 0.914699033 |
| ENSG00000185686 | 1203.999997 | 0.752300956  | 0.075675772 | 9.941107109  | 2.76E-23    | 1.10E-21    |
| ENSG00000185697 | 86.26196504 | -1.057786481 | 0.209428063 | -5.050834486 | 4.40E-07    | 4.19E-06    |
| ENSG00000185716 | 66.63526901 | -0.207045174 | 0.213544993 | -0.969562296 | 0.332264714 | 0.504664078 |
| ENSG00000185721 | 283.2394019 | 0.157387113  | 0.129130787 | 1.218819444  | 0.22291273  | 0.381163131 |

|                 |             |              |             |              |             |             |
|-----------------|-------------|--------------|-------------|--------------|-------------|-------------|
| ENSG00000185722 | 570.3432605 | 0.067558413  | 0.086176902 | 0.783950355  | 0.433069241 | 0.599401284 |
| ENSG00000185728 | 683.5097147 | 0.043899447  | 0.08630737  | 0.508640767  | 0.611004048 | 0.746977708 |
| ENSG00000185730 | 65.42384398 | -0.343377956 | 0.221075259 | -1.553217477 | 0.120371187 | 0.242431681 |
| ENSG00000185742 | 93.12956921 | -8.014493233 | 1.007259187 | -7.956733818 | 1.77E-15    | 4.42E-14    |
| ENSG00000185745 | 98.89314578 | 0.481694895  | 0.204260315 | 2.358240243  | 0.018361805 | 0.053864066 |
| ENSG00000185753 | 85.30742539 | 0.411665028  | 0.209410084 | 1.965831921  | 0.049318029 | 0.12058216  |
| ENSG00000185760 | 307.679479  | 1.148109559  | 0.117337723 | 9.784658632  | 1.31E-22    | 5.04E-21    |
| ENSG00000185761 | 62.48562002 | -0.729815944 | 0.245546145 | -2.972215031 | 0.002956595 | 0.011387797 |
| ENSG00000185787 | 1022.963896 | 0.150343055  | 0.083460929 | 1.801358524  | 0.071646389 | 0.161877671 |
| ENSG00000185798 | 53.06129911 | 0.050333347  | 0.246136807 | 0.204493378  | 0.837967966 | 0.905456617 |
| ENSG00000185800 | 210.9217377 | -0.102650211 | 0.14005107  | -0.732948418 | 0.463589891 | 0.626640415 |
| ENSG00000185803 | 110.4245403 | 0.335803347  | 0.170666409 | 1.967600709  | 0.049113998 | 0.120234286 |
| ENSG00000185808 | 103.5208301 | -0.042163471 | 0.178955612 | -0.235608546 | 0.813736442 | 0.890577    |
| ENSG00000185813 | 366.1891578 | 0.107767114  | 0.121758632 | 0.885088085  | 0.376109125 | 0.546004956 |
| ENSG00000185818 | 333.3130748 | 0.132343664  | 0.108401269 | 1.220868215  | 0.222135921 | 0.380205103 |
| ENSG00000185825 | 555.5115982 | 0.88245419   | 0.09589329  | 9.20246024   | 3.50E-20    | 1.19E-18    |
| ENSG00000185829 | 7.508849423 | -0.193789476 | 0.649497989 | -0.298368093 | 0.765422239 | 0.858571124 |
| ENSG00000185838 | 33.65601083 | 0.132746506  | 0.296348854 | 0.447940002  | 0.654196498 | 0.778174175 |
| ENSG00000185842 | 897.3067084 | -0.083018234 | 0.075124949 | -1.105068758 | 0.269129797 | 0.436341904 |
| ENSG00000185864 | 38.89643709 | -0.027216675 | 0.291979635 | -0.093214292 | 0.925733321 | 0.959334816 |
| ENSG00000185875 | 56.13859989 | -0.229416297 | 0.262133623 | -0.875188365 | 0.381471423 | 0.550886667 |
| ENSG00000185880 | 80.42682609 | -0.180448778 | 0.201216765 | -0.896787986 | 0.36983206  | 0.541149056 |
| ENSG00000185885 | 558.7139675 | 0.764989555  | 0.11754539  | 6.508035379  | 7.61E-11    | 1.23E-09    |
| ENSG00000185896 | 1608.727772 | 0.706238639  | 0.065739708 | 10.74295371  | 6.40E-27    | 3.07E-25    |
| ENSG00000185900 | 797.2299332 | -0.279569609 | 0.077173471 | -3.622612848 | 0.000291642 | 0.001500622 |
| ENSG00000185904 | 220.3116545 | 0.252330589  | 0.133420592 | 1.891241716  | 0.058592085 | 0.138001848 |
| ENSG00000185909 | 15.47464586 | -0.267359948 | 0.446063468 | -0.599376472 | 0.548921863 | 0.697107442 |
| ENSG00000185917 | 59.12062264 | 0.063531314  | 0.23833329  | 0.266565004  | 0.789804104 | 0.874468215 |
| ENSG00000185920 | 782.3685638 | -0.3690859   | 0.080828004 | -4.56631218  | 4.96E-06    | 3.80E-05    |
| ENSG00000185924 | 163.5101624 | 0.798337582  | 0.174337908 | 4.579254115  | 4.67E-06    | 3.59E-05    |
| ENSG00000185946 | 105.7136832 | -0.025295049 | 0.178664692 | -0.141578331 | 0.887413084 | 0.93824263  |
| ENSG00000185947 | 191.5938456 | -0.258234817 | 0.135009685 | -1.912713282 | 0.055784768 | 0.132927674 |
| ENSG00000185963 | 595.2191272 | 0.119647769  | 0.084251196 | 1.420131393  | 0.155569432 | 0.29309064  |
| ENSG00000185973 | 97.48742454 | -0.122387796 | 0.18829211  | -0.649988978 | 0.515699341 | 0.671096242 |
| ENSG00000185989 | 227.2986266 | 0.850427986  | 0.124385862 | 6.837014853  | 8.09E-12    | 1.44E-10    |
| ENSG00000186001 | 427.4937524 | -0.026934767 | 0.096108872 | -0.280252663 | 0.779283665 | 0.868088632 |
| ENSG00000186010 | 11.99361531 | 0.588185914  | 0.498415706 | 1.180111114  | 0.237956025 | 0.399351049 |
| ENSG00000186017 | 54.64041307 | 0.081121086  | 0.235403645 | 0.344604204  | 0.730391945 | 0.83331836  |
| ENSG00000186020 | 102.3154152 | 0.227136117  | 0.176766039 | 1.284953372  | 0.198808579 | 0.350564914 |
| ENSG00000186026 | 28.72401213 | 1.143087918  | 0.338493434 | 3.376986971  | 0.000732845 | 0.003403067 |
| ENSG00000186056 | 21.85878943 | -0.259496086 | 0.371722317 | -0.698091221 | 0.485120148 | 0.64556022  |
| ENSG00000186063 | 79.55897488 | 0.318125931  | 0.196470099 | 1.619207872  | 0.105402545 | 0.218472709 |
| ENSG00000186073 | 260.0050097 | 0.387128263  | 0.119186773 | 3.248080743  | 0.001161863 | 0.005117808 |
| ENSG00000186088 | 21.37023903 | 0.228613095  | 0.381665247 | 0.598988504  | 0.549180551 | 0.69718384  |
| ENSG00000186104 | 55.37733594 | -0.070180935 | 0.233942448 | -0.299992309 | 0.764183022 | 0.857934696 |
| ENSG00000186106 | 61.01967293 | 0.094133804  | 0.224800655 | 0.418743458  | 0.675403632 | 0.793548715 |
| ENSG00000186111 | 551.7066908 | 0.101260759  | 0.086918918 | 1.165002532  | 0.244017968 | 0.407189403 |
| ENSG00000186130 | 101.1304547 | 0.052276396  | 0.179400473 | 0.291394974  | 0.770749258 | 0.862998381 |
| ENSG00000186132 | 54.20503848 | 0.818383575  | 0.24109594  | 3.394431173  | 0.000687713 | 0.003220103 |
| ENSG00000186141 | 203.1319897 | -0.047610259 | 0.133254978 | -0.35728691  | 0.720877028 | 0.82669276  |

|                 |             |              |              |              |             |             |
|-----------------|-------------|--------------|--------------|--------------|-------------|-------------|
| ENSG00000186153 | 89.34324957 | -1.512498102 | 0.211630847  | -7.146869782 | 8.88E-13    | 1.77E-11    |
| ENSG00000186166 | 148.4483339 | 0.291136206  | 0.157848333  | 1.844404694  | 0.065124184 | 0.150361507 |
| ENSG00000186174 | 1427.376385 | -0.168706281 | 0.07544428   | -2.236170594 | 0.025340599 | 0.070098344 |
| ENSG00000186184 | 638.5109176 | 0.075063688  | 0.084556584  | 0.887733214  | 0.374684275 | 0.544618172 |
| ENSG00000186185 | 603.3033598 | -0.09636515  | 0.092092927  | -1.046390355 | 0.295380844 | 0.465817428 |
| ENSG00000186187 | 164.5231095 | 0.318127927  | 0.147101825  | 2.162637531  | 0.030569069 | 0.081794572 |
| ENSG00000186193 | 1067.622068 | 0.445243758  | 0.07037731   | 6.326524212  | 2.51E-10    | 3.76E-09    |
| ENSG00000186197 | 154.8594361 | -6.757327566 | 0.525715648  | -12.85357892 | 8.21E-38    | 5.95E-36    |
| ENSG00000186222 | 47.27212792 | 0.401962513  | 0.261348346  | 1.538033506  | 0.124040423 | 0.248072881 |
| ENSG00000186230 | 94.54967434 | 0.14895643   | 0.185497509  | 0.803010406  | 0.42196872  | 0.589614505 |
| ENSG00000186235 | 8.891343525 | 0.801045578  | 0.581384609  | 1.377823846  | 0.168257682 | 0.310553665 |
| ENSG00000186260 | 557.0818869 | -0.057654071 | 0.093962717  | -0.613584545 | 0.539489899 | 0.689580557 |
| ENSG00000186272 | 20.73294735 | 0.268662485  | 0.388094001  | 0.69226137   | 0.488773205 | 0.648634597 |
| ENSG00000186280 | 24.30921383 | -0.476565277 | 0.385233623  | -1.237081212 | 0.216056934 | 0.372341032 |
| ENSG00000186283 | 582.8673387 | 0.185048051  | 0.085974055  | 2.15237087   | 0.031368156 | 0.083468174 |
| ENSG00000186297 | 14.59574305 | -6.170784183 | 1.234322817  | -4.999327646 | 5.75E-07    | 5.37E-06    |
| ENSG00000186298 | 984.8434321 | -0.175609134 | 0.074806339  | -2.347516774 | 0.018899022 | 0.055112013 |
| ENSG00000186300 | 39.16548733 | -0.298511044 | 0.288000441  | -1.036495095 | 0.299971226 | 0.470406446 |
| ENSG00000186310 | 148.2735192 | -3.272535127 | 0.208733479  | -15.67805577 | 2.14E-55    | 2.57E-53    |
| ENSG00000186314 | 110.3280214 | 0.138204295  | 0.171426669  | 0.80620067   | 0.420127152 | 0.587797573 |
| ENSG00000186318 | 172.5339506 | -0.618406831 | 0.140045793  | -4.41574729  | 1.01E-05    | 7.22E-05    |
| ENSG00000186326 | 10.67140613 | -0.473805416 | 0.533672941  | -0.887819823 | 0.374637678 | 0.544606796 |
| ENSG00000186340 | 78.56612143 | 3.332725365  | 0.269323539  | 12.3744303   | 3.59E-35    | 2.37E-33    |
| ENSG00000186350 | 304.355094  | 0.085286011  | 0.1111006891 | 0.768294745  | 0.442312096 | 0.607378766 |
| ENSG00000186352 | 16.23498823 | 0.737122777  | 0.43117988   | 1.709548176  | 0.087349456 | 0.188826994 |
| ENSG00000186364 | 33.11257981 | -0.114032612 | 0.301482791  | -0.378239206 | 0.705252903 | 0.815029825 |
| ENSG00000186376 | 74.70217688 | -0.1548288   | 0.205751252  | -0.752504778 | 0.451747558 | 0.616629899 |
| ENSG00000186395 | 155.4230562 | 0.256273762  | 0.1499054    | 1.70956992   | 0.087345432 | 0.188826994 |
| ENSG00000186409 | 11.91362496 | -0.802355494 | 0.550834535  | -1.456617994 | 0.145221858 | 0.278336941 |
| ENSG00000186416 | 229.0045184 | 0.216598481  | 0.134565791  | 1.609610281  | 0.107482962 | 0.221998702 |
| ENSG00000186432 | 731.9032487 | 0.015996386  | 0.08166151   | 0.195886482  | 0.844699018 | 0.909999778 |
| ENSG00000186448 | 75.35127323 | -0.326232524 | 0.20740144   | -1.572952068 | 0.115729917 | 0.234692844 |
| ENSG00000186468 | 8884.396053 | 0.205345199  | 0.080192452  | 2.560654948  | 0.010447506 | 0.033462203 |
| ENSG00000186470 | 131.7802592 | 0.321567391  | 0.163451302  | 1.967359002  | 0.049141837 | 0.120281476 |
| ENSG00000186472 | 10.21834409 | -1.326454982 | 0.579145181  | -2.290366949 | 0.022000054 | 0.062371399 |
| ENSG00000186480 | 828.7691547 | 1.162581968  | 0.082378304  | 14.11272038  | 3.17E-45    | 2.87E-43    |
| ENSG00000186501 | 87.26451657 | 0.232805662  | 0.198646111  | 1.171961843  | 0.241212376 | 0.403706689 |
| ENSG00000186510 | 5.446130866 | -5.726044647 | 1.320470833  | -4.336365867 | 1.45E-05    | 0.000100336 |
| ENSG00000186522 | 250.258545  | -0.454817548 | 0.11869637   | -3.831773016 | 0.000127223 | 0.000716274 |
| ENSG00000186523 | 13.3116834  | 0.154725571  | 0.466317534  | 0.331803032  | 0.740037995 | 0.840999008 |
| ENSG00000186532 | 125.6827297 | -0.23468333  | 0.164237297  | -1.428928354 | 0.153024827 | 0.28947221  |
| ENSG00000186566 | 1257.805914 | -0.181969928 | 0.069251788  | -2.627656749 | 0.008597522 | 0.028447185 |
| ENSG00000186567 | 122.8236368 | 0.294331782  | 0.172028345  | 1.710949335  | 0.087090466 | 0.188441124 |
| ENSG00000186575 | 762.4533483 | -0.149920707 | 0.083063975  | -1.804882398 | 0.071093087 | 0.160967858 |
| ENSG00000186577 | 120.8220473 | 0.680644675  | 0.16479378   | 4.130281334  | 3.62E-05    | 0.000230086 |
| ENSG00000186591 | 631.2241794 | 0.461560408  | 0.082136064  | 5.619460968  | 1.92E-08    | 2.26E-07    |
| ENSG00000186594 | 27.92178705 | -0.237940338 | 0.326897713  | -0.727873976 | 0.466690735 | 0.628895314 |
| ENSG00000186615 | 38.67097085 | 0.224429092  | 0.281870156  | 0.796214455  | 0.425907397 | 0.593170852 |
| ENSG00000186625 | 120.1537257 | 0.630472775  | 0.173597357  | 3.631810909  | 0.000281439 | 0.001453982 |
| ENSG00000186635 | 604.6169582 | 0.780497856  | 0.090708724  | 8.604440947  | 7.67E-18    | 2.25E-16    |

|                 |             |              |             |              |             |             |
|-----------------|-------------|--------------|-------------|--------------|-------------|-------------|
| ENSG00000186638 | 146.5229895 | -0.497997837 | 0.152359281 | -3.268575661 | 0.001080903 | 0.004817081 |
| ENSG00000186648 | 17.70719385 | -0.826969342 | 0.41913144  | -1.973054903 | 0.048489307 | 0.119099371 |
| ENSG00000186654 | 80.6445544  | -0.522989727 | 0.200016544 | -2.614732345 | 0.00892974  | 0.029328048 |
| ENSG00000186660 | 449.5829316 | -0.067496405 | 0.098204496 | -0.687304634 | 0.491890779 | 0.651295106 |
| ENSG00000186665 | 107.4358827 | 0.023687682  | 0.17214143  | 0.137605931  | 0.890551868 | 0.940145956 |
| ENSG00000186666 | 23.60197023 | -0.079726563 | 0.362164578 | -0.220139042 | 0.82576287  | 0.898324082 |
| ENSG00000186684 | 58.96820963 | -0.657585809 | 0.234335875 | -2.806167898 | 0.005013456 | 0.017946998 |
| ENSG00000186687 | 139.1743644 | 0.356472319  | 0.157789607 | 2.259162223  | 0.023873296 | 0.066696139 |
| ENSG00000186716 | 618.5262995 | 0.184602102  | 0.086213282 | 2.14122578   | 0.032255835 | 0.085361288 |
| ENSG00000186765 | 26.63388962 | 0.956441291  | 0.3649325   | 2.62087178   | 0.008770524 | 0.028899731 |
| ENSG00000186767 | 78.04260348 | 0.13985068   | 0.202242984 | 0.6914983    | 0.489252449 | 0.649021541 |
| ENSG00000186787 | 21.62532672 | 0.11282814   | 0.388469158 | 0.290442981  | 0.771477366 | 0.863328623 |
| ENSG00000186792 | 41.94569206 | -0.11735212  | 0.265493571 | -0.442014922 | 0.658478408 | 0.781352103 |
| ENSG00000186806 | 82.36569516 | -0.360269537 | 0.201881467 | -1.784559733 | 0.074332758 | 0.166292761 |
| ENSG00000186812 | 201.9556408 | 0.146707102  | 0.137955931 | 1.06343454   | 0.287584936 | 0.45760145  |
| ENSG00000186814 | 135.877904  | -0.51662946  | 0.159993612 | -3.229063053 | 0.001241965 | 0.005424916 |
| ENSG00000186815 | 206.8149231 | -0.471843723 | 0.131600379 | -3.585428295 | 0.000336525 | 0.001701646 |
| ENSG00000186834 | 531.6386698 | -0.18828213  | 0.088948962 | -2.116743408 | 0.034281631 | 0.089909273 |
| ENSG00000186862 | 32.49350068 | -0.457906895 | 0.307449656 | -1.489371952 | 0.13638945  | 0.265918808 |
| ENSG00000186866 | 141.8334413 | 0.434335589  | 0.160140183 | 2.712221134  | 0.006683399 | 0.022870087 |
| ENSG00000186868 | 45.8246197  | -0.001820808 | 0.272617902 | -0.006678975 | 0.994670988 | 0.99758811  |
| ENSG00000186871 | 163.6317186 | -0.259061147 | 0.142758304 | -1.814683559 | 0.069572553 | 0.158264883 |
| ENSG00000186897 | 70.25050402 | -0.849865282 | 0.213824951 | -3.97458425  | 7.05E-05    | 0.00042011  |
| ENSG00000186907 | 13.06028553 | 0.105327859  | 0.48167803  | 0.218668597  | 0.826908213 | 0.898668717 |
| ENSG00000186908 | 156.9301038 | -0.615780837 | 0.146832768 | -4.193756244 | 2.74E-05    | 0.000178845 |
| ENSG00000186918 | 260.4931808 | 0.258059082  | 0.117526044 | 2.195760812  | 0.028109068 | 0.076417278 |
| ENSG00000186951 | 76.81545588 | -0.751853954 | 0.217861804 | -3.451059073 | 0.000558391 | 0.002670658 |
| ENSG00000186998 | 51.32094855 | 0.775588376  | 0.247913121 | 3.128468446  | 0.001757199 | 0.00732227  |
| ENSG00000187013 | 31.87653885 | 0.002119938  | 0.352787253 | 0.006009113  | 0.995205451 | 0.997940364 |
| ENSG00000187017 | 105.623365  | -0.841648091 | 0.177119244 | -4.751872652 | 2.02E-06    | 1.68E-05    |
| ENSG00000187024 | 46.89192438 | 0.385822522  | 0.259355185 | 1.487622164  | 0.136850565 | 0.26648561  |
| ENSG00000187049 | 37.89838631 | 0.278978325  | 0.298179722 | 0.93560462   | 0.349476795 | 0.521523482 |
| ENSG00000187051 | 558.691944  | 0.216040259  | 0.097009563 | 2.2269996    | 0.025947301 | 0.071551184 |
| ENSG00000187079 | 1188.970902 | 0.107172127  | 0.07027838  | 1.524965806  | 0.127267627 | 0.252485707 |
| ENSG00000187091 | 46.44231617 | -0.09653465  | 0.269738136 | -0.357882841 | 0.720430992 | 0.826383648 |
| ENSG00000187097 | 148.286404  | 0.043866912  | 0.148303259 | 0.295791959  | 0.767388964 | 0.860009596 |
| ENSG00000187109 | 3004.818271 | -0.118088803 | 0.059624491 | -1.980541911 | 0.047642669 | 0.117409924 |
| ENSG00000187118 | 212.3590385 | 0.006153972  | 0.125637076 | 0.048982131  | 0.960933536 | 0.979339286 |
| ENSG00000187147 | 442.5952051 | 0.082284838  | 0.094781811 | 0.868150089  | 0.385312173 | 0.554220656 |
| ENSG00000187164 | 78.34378093 | 0.015444671  | 0.215522182 | 0.071661631  | 0.942871191 | 0.968520046 |
| ENSG00000187187 | 49.69671356 | -0.006023592 | 0.262111512 | -0.022981026 | 0.981665408 | 0.990764045 |
| ENSG00000187189 | 56.13316311 | -0.509979537 | 0.234101918 | -2.178450912 | 0.029372483 | 0.079078779 |
| ENSG00000187239 | 522.5455717 | -0.075059554 | 0.08836037  | -0.849470801 | 0.395619371 | 0.563445737 |
| ENSG00000187240 | 1106.12369  | -0.031635138 | 0.079152286 | -0.399674347 | 0.689396389 | 0.804503503 |
| ENSG00000187244 | 276.2414484 | -1.600928125 | 0.123526439 | -12.96020622 | 2.06E-38    | 1.52E-36    |
| ENSG00000187257 | 332.7549049 | 0.063901178  | 0.110991916 | 0.575728217  | 0.5647989   | 0.710778833 |
| ENSG00000187260 | 9.540231138 | -1.916475273 | 0.641580745 | -2.987114699 | 0.00281624  | 0.010940191 |
| ENSG00000187266 | 84.04647375 | -0.451297007 | 0.195878077 | -2.303968952 | 0.021224386 | 0.060634321 |
| ENSG00000187325 | 75.16340434 | 0.388550269  | 0.20802929  | 1.867767126  | 0.061794537 | 0.144238596 |
| ENSG00000187446 | 506.7818654 | -0.051248158 | 0.100822754 | -0.508299526 | 0.611243303 | 0.747205175 |



|                 |             |              |             |              |             |             |
|-----------------|-------------|--------------|-------------|--------------|-------------|-------------|
| ENSG00000187475 | 17.16063588 | 1.961629914  | 0.461085063 | 4.25437749   | 2.10E-05    | 0.00014029  |
| ENSG00000187486 | 20.5474551  | 0.052369869  | 0.377906173 | 0.138579025  | 0.889782819 | 0.939631412 |
| ENSG00000187514 | 6502.2208   | 0.233182257  | 0.050744314 | 4.595239096  | 4.32E-06    | 3.35E-05    |
| ENSG00000187522 | 61.30450645 | 0.271897767  | 0.229895724 | 1.182700412  | 0.236927901 | 0.398196485 |
| ENSG00000187531 | 261.8851498 | 0.539190619  | 0.136250871 | 3.957337049  | 7.58E-05    | 0.000448451 |
| ENSG00000187535 | 303.9437113 | -0.493888733 | 0.109403805 | -4.514365235 | 6.35E-06    | 4.75E-05    |
| ENSG00000187546 | 395.8214975 | -0.592544949 | 0.105317307 | -5.626282748 | 1.84E-08    | 2.18E-07    |
| ENSG00000187555 | 1260.492482 | 0.177274109  | 0.070203735 | 2.525137869  | 0.011565291 | 0.036490934 |
| ENSG00000187583 | 51.05433913 | -0.577803995 | 0.260414823 | -2.218783047 | 0.026501488 | 0.072822066 |
| ENSG00000187595 | 11.81680389 | -0.682768183 | 0.527081019 | -1.295376153 | 0.1951905   | 0.346334948 |
| ENSG00000187601 | 80.23220231 | -0.853560786 | 0.204316408 | -4.177641886 | 2.95E-05    | 0.000190405 |
| ENSG00000187605 | 368.946498  | -0.676952287 | 0.102431604 | -6.608822497 | 3.87E-11    | 6.45E-10    |
| ENSG00000187607 | 37.93939422 | 0.087783365  | 0.311220379 | 0.282061751  | 0.777896161 | 0.86702431  |
| ENSG00000187608 | 329.2618512 | 1.783034362  | 0.125672326 | 14.18796345  | 1.09E-45    | 1.01E-43    |
| ENSG00000187609 | 45.38026257 | -0.159635221 | 0.273610608 | -0.583439445 | 0.559597511 | 0.70625932  |
| ENSG00000187624 | 100.9466912 | 0.245771201  | 0.182430631 | 1.34720359   | 0.177914672 | 0.323391227 |
| ENSG00000187626 | 22.36657927 | 0.158812395  | 0.378518518 | 0.419563079  | 0.674804665 | 0.793044913 |
| ENSG00000187630 | 14.45535387 | -0.259717269 | 0.461094369 | -0.56326272  | 0.573256    | 0.717878752 |
| ENSG00000187634 | 115.0181949 | -0.335391393 | 0.173162821 | -1.936855681 | 0.052762987 | 0.127172561 |
| ENSG00000187672 | 17.24542073 | -5.570565425 | 1.05256232  | -5.292385373 | 1.21E-07    | 1.26E-06    |
| ENSG00000187676 | 107.780716  | 0.070341761  | 0.171180611 | 0.410921307  | 0.681130238 | 0.798112265 |
| ENSG00000187678 | 2453.993576 | -0.340933392 | 0.062437946 | -5.460355633 | 4.75E-08    | 5.28E-07    |
| ENSG00000187699 | 12.42024647 | 0.630049292  | 0.493851874 | 1.275785969  | 0.202031189 | 0.354594883 |
| ENSG00000187713 | 85.59891401 | -0.100855515 | 0.190036638 | -0.530716161 | 0.595615485 | 0.735203051 |
| ENSG00000187720 | 54.35154789 | -1.030771816 | 0.245312476 | -4.201872785 | 2.65E-05    | 0.000173032 |
| ENSG00000187735 | 132.903377  | 0.124514517  | 0.159722848 | 0.779566094  | 0.43564632  | 0.601782265 |
| ENSG00000187736 | 106.5270712 | -0.467076616 | 0.174017855 | -2.684072943 | 0.007273124 | 0.024653853 |
| ENSG00000187741 | 543.0143138 | 0.081011129  | 0.102458952 | 0.790669109  | 0.429137107 | 0.59601433  |
| ENSG00000187742 | 323.988911  | -0.192903718 | 0.107381978 | -1.796425441 | 0.072426881 | 0.163146311 |
| ENSG00000187764 | 92.76529153 | 0.108164034  | 0.185291315 | 0.583751237  | 0.55938769  | 0.706121395 |
| ENSG00000187772 | 533.1290754 | -0.471038613 | 0.090353392 | -5.213291997 | 1.86E-07    | 1.87E-06    |
| ENSG00000187778 | 339.666056  | 0.11720779   | 0.107078105 | 1.094600901  | 0.273691521 | 0.4419017   |
| ENSG00000187790 | 135.877201  | -0.062497034 | 0.15959301  | -0.39160258  | 0.695351881 | 0.808571942 |
| ENSG00000187792 | 234.4699618 | 0.198151091  | 0.123316442 | 1.606850533  | 0.10808716  | 0.222886133 |
| ENSG00000187796 | 13.3782535  | 1.14311532   | 0.510290646 | 2.240125953  | 0.025082747 | 0.069453449 |
| ENSG00000187801 | 148.3016458 | -0.047483477 | 0.149201223 | -0.318251262 | 0.750294351 | 0.84850184  |
| ENSG00000187808 | 16.23784843 | 1.21588725   | 0.437282755 | 2.780551571  | 0.005426664 | 0.019157665 |
| ENSG00000187824 | 61.05587187 | -0.363829089 | 0.226732682 | -1.604660985 | 0.108568432 | 0.223648742 |
| ENSG00000187837 | 3122.065661 | -0.015859694 | 0.070817641 | -0.223951181 | 0.822795291 | 0.896348169 |
| ENSG00000187840 | 323.7952737 | -0.178699393 | 0.119770144 | -1.492019517 | 0.135694029 | 0.264919253 |
| ENSG00000187860 | 19.32442957 | -1.213195334 | 0.408113152 | -2.972693551 | 0.00295199  | 0.011378779 |
| ENSG00000187866 | 49.38716621 | -0.127186578 | 0.247749361 | -0.513367934 | 0.607693972 | 0.744291326 |
| ENSG00000187867 | 139.5667778 | -1.238454818 | 0.168718661 | -7.34035469  | 2.13E-13    | 4.51E-12    |
| ENSG00000187902 | 17.02543321 | -0.183577002 | 0.421006232 | -0.436043432 | 0.662805218 | 0.784604829 |
| ENSG00000187944 | 21.96879652 | 0.538545973  | 0.403176755 | 1.335756505  | 0.181628874 | 0.328354098 |
| ENSG00000187954 | 93.51634091 | -0.292103606 | 0.190974949 | -1.52953886  | 0.126130913 | 0.25112853  |
| ENSG00000187961 | 151.0498856 | -0.037088037 | 0.156982758 | -0.236255478 | 0.813234433 | 0.890235667 |
| ENSG00000188010 | 28.18212739 | 0.097687446  | 0.323207967 | 0.302243311  | 0.76246659  | 0.856780379 |
| ENSG00000188021 | 413.0323485 | 0.182081325  | 0.097368034 | 1.870031856  | 0.061479394 | 0.143598446 |
| ENSG00000188026 | 457.9964439 | 0.497162739  | 0.096358847 | 5.159492408  | 2.48E-07    | 2.45E-06    |

|                 |             |              |             |              |             |             |
|-----------------|-------------|--------------|-------------|--------------|-------------|-------------|
| ENSG00000188033 | 29.30452368 | -0.017122574 | 0.329708758 | -0.051932421 | 0.958582541 | 0.977723566 |
| ENSG00000188070 | 446.3519057 | 0.525813594  | 0.098754226 | 5.324466743  | 1.01E-07    | 1.06E-06    |
| ENSG00000188092 | 39.39241478 | 0.275836634  | 0.278810647 | 0.989333218  | 0.322500137 | 0.494364363 |
| ENSG00000188130 | 357.8515758 | -0.141348365 | 0.102746555 | -1.375699304 | 0.168914748 | 0.311407528 |
| ENSG00000188153 | 226.5768851 | -0.385156923 | 0.130747156 | -2.945814923 | 0.003221051 | 0.012278453 |
| ENSG00000188157 | 478.0955986 | -0.266423594 | 0.106762975 | -2.495468063 | 0.012579108 | 0.039205457 |
| ENSG00000188167 | 104.5293964 | -0.251061641 | 0.180065422 | -1.394280135 | 0.163233027 | 0.30356937  |
| ENSG00000188177 | 123.5894515 | -0.728925301 | 0.165251768 | -4.410998508 | 1.03E-05    | 7.36E-05    |
| ENSG00000188185 | 54.65104502 | -0.116949851 | 0.238646474 | -0.490054805 | 0.624095118 | 0.75594241  |
| ENSG00000188186 | 481.676512  | 0.188421485  | 0.109039286 | 1.728014666  | 0.083985595 | 0.183532304 |
| ENSG00000188191 | 162.4031734 | 0.37418357   | 0.141759015 | 2.639575115  | 0.008301003 | 0.027624777 |
| ENSG00000188211 | 737.2148359 | 0.142782925  | 0.080799218 | 1.7671325    | 0.077206041 | 0.171652224 |
| ENSG00000188215 | 68.39756058 | 0.018298866  | 0.217613626 | 0.084088789  | 0.932985838 | 0.963270344 |
| ENSG00000188219 | 197.1470546 | 0.273259337  | 0.145053596 | 1.883850827  | 0.059585156 | 0.139973162 |
| ENSG00000188229 | 1909.304634 | 0.005566767  | 0.064642752 | 0.086115869  | 0.931374309 | 0.962835952 |
| ENSG00000188234 | 10.46903802 | -0.212242672 | 0.530740664 | -0.399899021 | 0.689230894 | 0.804480669 |
| ENSG00000188243 | 485.6362649 | 0.178974943  | 0.098052145 | 1.825303694  | 0.067955213 | 0.155542916 |
| ENSG00000188263 | 8.548186231 | -1.553983116 | 0.63223694  | -2.457912561 | 0.013974719 | 0.042804816 |
| ENSG00000188266 | 88.26477339 | -0.724792468 | 0.196178395 | -3.694558044 | 0.00022027  | 0.001166275 |
| ENSG00000188277 | 18.18804938 | -0.563491346 | 0.420092289 | -1.34135132  | 0.179806415 | 0.325817945 |
| ENSG00000188283 | 33.15002852 | 0.170659556  | 0.306213075 | 0.55732289   | 0.577306839 | 0.721094538 |
| ENSG00000188290 | 128.5767241 | -1.179179091 | 0.183045201 | -6.442010429 | 1.18E-10    | 1.85E-09    |
| ENSG00000188295 | 62.71852769 | -0.026287253 | 0.222403594 | -0.11819617  | 0.905912225 | 0.949652912 |
| ENSG00000188312 | 97.05883189 | -0.036079349 | 0.182426088 | -0.19777516  | 0.843220981 | 0.909104699 |
| ENSG00000188313 | 83.98461851 | 1.09537314   | 0.20401983  | 5.368954272  | 7.92E-08    | 8.45E-07    |
| ENSG00000188315 | 87.04394554 | -0.121555937 | 0.198520743 | -0.612308493 | 0.540333672 | 0.690319881 |
| ENSG00000188322 | 62.77292531 | -0.548125125 | 0.262808273 | -2.08564639  | 0.037010666 | 0.095673321 |
| ENSG00000188338 | 47.22414289 | -0.606253071 | 0.261918835 | -2.31466008  | 0.020631542 | 0.059278231 |
| ENSG00000188342 | 174.0726883 | -0.125118126 | 0.139412427 | -0.897467527 | 0.369469494 | 0.540900258 |
| ENSG00000188343 | 244.1750326 | -0.01023393  | 0.125956375 | -0.081249798 | 0.935243297 | 0.964705728 |
| ENSG00000188352 | 253.2857634 | 0.229691715  | 0.120111161 | 1.912326166  | 0.055834372 | 0.132980141 |
| ENSG00000188368 | 12.25161275 | 0.750182727  | 0.512589161 | 1.463516565  | 0.143326084 | 0.275605956 |
| ENSG00000188372 | 56.73916369 | 0.234240624  | 0.230611905 | 1.015735177  | 0.309755512 | 0.481094524 |
| ENSG00000188385 | 104.6189668 | 1.953413796  | 0.196087313 | 9.961959135  | 2.24E-23    | 9.03E-22    |
| ENSG00000188394 | 10.74440135 | 0.017212302  | 0.539256622 | 0.031918573  | 0.974536987 | 0.9869734   |
| ENSG00000188419 | 285.5565711 | -0.08732791  | 0.115338545 | -0.757144197 | 0.448963478 | 0.613959304 |
| ENSG00000188428 | 42.01810023 | -0.463009309 | 0.274533414 | -1.686531715 | 0.091693432 | 0.196187994 |
| ENSG00000188483 | 374.8637212 | 0.047511724  | 0.110583773 | 0.429644629  | 0.667454168 | 0.787413177 |
| ENSG00000188486 | 885.9238993 | -0.153748736 | 0.100760268 | -1.525886527 | 0.127038127 | 0.252210352 |
| ENSG00000188493 | 136.155316  | -0.054825862 | 0.15554166  | -0.352483457 | 0.724475722 | 0.829465358 |
| ENSG00000188517 | 10.19454212 | 0.60456776   | 0.557664205 | 1.084107166  | 0.278317286 | 0.447160347 |
| ENSG00000188529 | 1135.445326 | -0.066587214 | 0.070235811 | -0.948052186 | 0.343102888 | 0.515020973 |
| ENSG00000188542 | 36.57023703 | -0.954502469 | 0.321448635 | -2.969377888 | 0.002984034 | 0.011484034 |
| ENSG00000188554 | 669.7586253 | 0.341281623  | 0.089785663 | 3.80107036   | 0.000144072 | 0.000799571 |
| ENSG00000188559 | 146.6029401 | -0.004291089 | 0.154581337 | -0.027759427 | 0.977854026 | 0.988629033 |
| ENSG00000188566 | 78.88110167 | -0.181201234 | 0.21368658  | -0.847976667 | 0.396450965 | 0.564286828 |
| ENSG00000188582 | 14.03057782 | -0.111372493 | 0.455814665 | -0.24433723  | 0.806969652 | 0.8858602   |
| ENSG00000188603 | 10.81274988 | 0.660474621  | 0.529364083 | 1.247675547  | 0.2121499   | 0.367255658 |
| ENSG00000188610 | 15.49313316 | -0.368531241 | 0.471663245 | -0.781343988 | 0.434600205 | 0.600869004 |
| ENSG00000188612 | 1459.418475 | 0.157121184  | 0.075193394 | 2.089560993  | 0.036657254 | 0.095001498 |

|                 |             |              |             |              |             |             |
|-----------------|-------------|--------------|-------------|--------------|-------------|-------------|
| ENSG00000188613 | 8.560982508 | -1.331978201 | 0.617361208 | -2.157534654 | 0.03096403  | 0.082596227 |
| ENSG00000188636 | 379.7801095 | -0.064469602 | 0.099848442 | -0.64567459  | 0.51849012  | 0.673375621 |
| ENSG00000188641 | 75.34611613 | 0.51557698   | 0.208558659 | 2.47209578   | 0.013432352 | 0.041441742 |
| ENSG00000188647 | 455.4363614 | 0.018838904  | 0.096694264 | 0.194829595  | 0.845526352 | 0.910611721 |
| ENSG00000188659 | 33.17950858 | -0.281606455 | 0.300651097 | -0.936655337 | 0.348935877 | 0.520882281 |
| ENSG00000188677 | 274.6511536 | -0.817584502 | 0.116119042 | -7.040916718 | 1.91E-12    | 3.71E-11    |
| ENSG00000188690 | 501.6204558 | 0.099962593  | 0.093713788 | 1.066679681  | 0.286116505 | 0.455781192 |
| ENSG00000188706 | 327.9461477 | 0.565486536  | 0.111791263 | 5.058414422  | 4.23E-07    | 4.04E-06    |
| ENSG00000188725 | 241.294113  | 0.184533671  | 0.129192166 | 1.428365798  | 0.153186598 | 0.289728308 |
| ENSG00000188729 | 158.684688  | -2.567056119 | 0.177890208 | -14.43056452 | 3.32E-47    | 3.18E-45    |
| ENSG00000188735 | 231.9548079 | 0.235562575  | 0.12412488  | 1.897786927  | 0.057724156 | 0.136346262 |
| ENSG00000188739 | 11.81311959 | 0.055404324  | 0.499001012 | 0.111030484  | 0.911592174 | 0.952621281 |
| ENSG00000188747 | 25.56838334 | 0.302222828  | 0.342422727 | 0.882601544  | 0.377451594 | 0.546942701 |
| ENSG00000188760 | 22.18154766 | -0.403174686 | 0.379242614 | -1.063104912 | 0.287734377 | 0.457787382 |
| ENSG00000188763 | 15.03166598 | 0.26168006   | 0.473738024 | 0.552372929  | 0.580692874 | 0.723518357 |
| ENSG00000188766 | 109.2759795 | -0.067187304 | 0.181703384 | -0.369763638 | 0.71155861  | 0.819754269 |
| ENSG00000188785 | 52.24182937 | -0.067776859 | 0.251927059 | -0.26903366  | 0.78790378  | 0.873121205 |
| ENSG00000188786 | 164.1469585 | 0.184586996  | 0.152438683 | 1.210893405  | 0.22593626  | 0.384346812 |
| ENSG00000188807 | 259.7133094 | 0.040866473  | 0.121037218 | 0.337635595  | 0.735637815 | 0.83739245  |
| ENSG00000188811 | 161.4653816 | 0.112037442  | 0.154970067 | 0.722961825  | 0.469703338 | 0.631654585 |
| ENSG00000188818 | 87.42805443 | -0.035897647 | 0.199185707 | -0.180222003 | 0.856978286 | 0.918060409 |
| ENSG00000188827 | 268.2220501 | 0.163055925  | 0.115929177 | 1.406513263  | 0.159571769 | 0.298270744 |
| ENSG00000188846 | 2344.088793 | 0.114559445  | 0.059355849 | 1.930044758  | 0.053601292 | 0.128663252 |
| ENSG00000188848 | 28.87460213 | -3.635701051 | 0.492431261 | -7.383164594 | 1.55E-13    | 3.35E-12    |
| ENSG00000188878 | 41.34029837 | -0.185941542 | 0.267621135 | -0.694793937 | 0.487184448 | 0.647676578 |
| ENSG00000188883 | 11.45822057 | -1.512581459 | 0.575667169 | -2.627527745 | 0.008600783 | 0.028447185 |
| ENSG00000188895 | 641.6480491 | 0.226674635  | 0.085830182 | 2.640966486  | 0.00826699  | 0.027524628 |
| ENSG00000188897 | 77.15158417 | 0.361212487  | 0.207577261 | 1.740135143  | 0.081835291 | 0.179784224 |
| ENSG00000188906 | 182.1679953 | 0.500495391  | 0.147595635 | 3.39099047   | 0.000696405 | 0.003258476 |
| ENSG00000188916 | 11.56305945 | 0.561599173  | 0.508681576 | 1.104028923  | 0.269580591 | 0.436770308 |
| ENSG00000188917 | 132.8195731 | 0.220554136  | 0.15742118  | 1.40104487   | 0.161200656 | 0.300555563 |
| ENSG00000188938 | 342.1174246 | -0.097094205 | 0.114648065 | -0.846889175 | 0.397056897 | 0.56492031  |
| ENSG00000188958 | 27.67807268 | -0.075086834 | 0.335596887 | -0.223741152 | 0.822958723 | 0.896348169 |
| ENSG00000188976 | 952.6493824 | -0.012710281 | 0.084558765 | -0.150312995 | 0.880517681 | 0.934116144 |
| ENSG00000188986 | 355.8879544 | 0.20031046   | 0.106823307 | 1.875156889  | 0.060771143 | 0.142346548 |
| ENSG00000188994 | 873.9432502 | -0.173127854 | 0.077147961 | -2.244101478 | 0.024825873 | 0.068837157 |
| ENSG00000188997 | 44.90180661 | 0.155536373  | 0.261861813 | 0.593963553  | 0.552536491 | 0.69986274  |
| ENSG00000189007 | 143.5924922 | 0.320637808  | 0.150969844 | 2.123853334  | 0.03368241  | 0.088519515 |
| ENSG00000189042 | 116.1159841 | 0.544837507  | 0.169448432 | 3.21535879   | 0.001302816 | 0.005651838 |
| ENSG00000189043 | 1397.912768 | 0.412117371  | 0.075977597 | 5.424195899  | 5.82E-08    | 6.37E-07    |
| ENSG00000189046 | 127.3800185 | -0.006143496 | 0.164555958 | -0.037333782 | 0.97021887  | 0.984516685 |
| ENSG00000189050 | 86.88527364 | 0.024914841  | 0.190485995 | 0.130796182  | 0.895936544 | 0.943561301 |
| ENSG00000189057 | 61.88453932 | -1.721483868 | 0.246363205 | -6.987585132 | 2.80E-12    | 5.28E-11    |
| ENSG00000189060 | 2194.732149 | -0.011463238 | 0.062699831 | -0.182827249 | 0.854933567 | 0.916666806 |
| ENSG00000189067 | 590.4642569 | 0.097916936  | 0.088144861 | 1.110863809  | 0.266626976 | 0.433380991 |
| ENSG00000189077 | 120.7708312 | 0.316039082  | 0.173414183 | 1.822452334  | 0.06838638  | 0.156224342 |
| ENSG00000189079 | 1023.05562  | -0.18725674  | 0.093004512 | -2.013415649 | 0.044070921 | 0.110507715 |
| ENSG00000189091 | 1540.30625  | 0.180701767  | 0.064397548 | 2.806034887  | 0.005015526 | 0.017949833 |
| ENSG00000189114 | 49.51606906 | 0.327325444  | 0.256591969 | 1.275665194  | 0.202073897 | 0.354594883 |
| ENSG00000189127 | 12.86170792 | -0.075032451 | 0.496495474 | -0.151124139 | 0.879877791 | 0.934004754 |

|                 |             |              |             |              |             |             |
|-----------------|-------------|--------------|-------------|--------------|-------------|-------------|
| ENSG00000189129 | 40.15720283 | 1.8284466    | 0.298024181 | 6.135228999  | 8.50E-10    | 1.19E-08    |
| ENSG00000189144 | 26.74754702 | 0.355906193  | 0.349490819 | 1.018356344  | 0.308508641 | 0.479754332 |
| ENSG00000189149 | 8.960712991 | -1.251023878 | 0.617131081 | -2.027160705 | 0.04264598  | 0.107701599 |
| ENSG00000189159 | 924.1372054 | 0.492762245  | 0.076065443 | 6.478135463  | 9.29E-11    | 1.48E-09    |
| ENSG00000189164 | 22.75733394 | 0.198248982  | 0.361798829 | 0.547953631  | 0.583723742 | 0.725753886 |
| ENSG00000189171 | 102.2829884 | -0.760622201 | 0.353709562 | -2.150414586 | 0.031522436 | 0.083799329 |
| ENSG00000189180 | 431.3480626 | -0.118140566 | 0.098624154 | -1.197886738 | 0.230961113 | 0.390457427 |
| ENSG00000189184 | 1950.730381 | 1.497712044  | 0.075611001 | 19.80812358  | 2.53E-87    | 5.48E-85    |
| ENSG00000189195 | 35.87976204 | -0.140778374 | 0.297099917 | -0.473841849 | 0.635612689 | 0.764749588 |
| ENSG00000189221 | 8.551805542 | -4.541938928 | 1.107492927 | -4.101099715 | 4.11E-05    | 0.000257627 |
| ENSG00000189227 | 36.48837815 | 0.230514422  | 0.29460937  | 0.782440906  | 0.433955502 | 0.600174999 |
| ENSG00000189241 | 1299.199174 | -0.224571073 | 0.069907156 | -3.212418962 | 0.001316223 | 0.005701197 |
| ENSG00000189266 | 403.0910075 | -0.290814646 | 0.106954219 | -2.719057266 | 0.006546827 | 0.022479414 |
| ENSG00000189283 | 70.51724613 | -0.274740817 | 0.21050645  | -1.305142038 | 0.191844487 | 0.342028113 |
| ENSG00000189298 | 72.80849829 | -0.621127202 | 0.224334751 | -2.768751602 | 0.005627152 | 0.019756212 |
| ENSG00000189306 | 703.4049073 | 0.584614996  | 0.080815957 | 7.233905523  | 4.69E-13    | 9.68E-12    |
| ENSG00000189308 | 287.1176796 | -0.202949072 | 0.116387223 | -1.743740137 | 0.081204413 | 0.178649709 |
| ENSG00000189319 | 255.240617  | 0.100257092  | 0.136193857 | 0.736135198  | 0.461648424 | 0.624677335 |
| ENSG00000189337 | 45.40417592 | -1.234879426 | 0.274060251 | -4.505868398 | 6.61E-06    | 4.92E-05    |
| ENSG00000189339 | 191.1057346 | 0.104583942  | 0.144500983 | 0.723759384  | 0.469213468 | 0.631144459 |
| ENSG00000189343 | 42.53220992 | 0.134499195  | 0.2789006   | 0.482247778  | 0.62962994  | 0.759894472 |
| ENSG00000189362 | 53.17894141 | -0.546554787 | 0.246379746 | -2.218343009 | 0.026531454 | 0.072875896 |
| ENSG00000189369 | 104.655133  | -0.267067327 | 0.176278131 | -1.515033801 | 0.129763844 | 0.256334232 |
| ENSG00000189376 | 38.65688227 | 0.325609502  | 0.290775458 | 1.119797056  | 0.262800254 | 0.429250601 |
| ENSG00000189403 | 1228.379701 | 0.181646393  | 0.079545891 | 2.28354212   | 0.022398455 | 0.063191624 |
| ENSG00000189410 | 30.76435994 | -0.167155581 | 0.339496964 | -0.49236252  | 0.62246309  | 0.75505595  |
| ENSG00000196072 | 88.11880163 | 0.100149213  | 0.189496426 | 0.528501859  | 0.597151057 | 0.736571392 |
| ENSG00000196074 | 298.5597911 | -2.664724575 | 0.135005992 | -19.7378245  | 1.02E-86    | 2.14E-84    |
| ENSG00000196081 | 69.65892805 | -0.325700088 | 0.215169817 | -1.513688547 | 0.130104851 | 0.256827269 |
| ENSG00000196110 | 59.43501664 | 0.318981971  | 0.225981327 | 1.411541279  | 0.158085073 | 0.296319858 |
| ENSG00000196116 | 30.7009789  | 0.755995579  | 0.320946732 | 2.355517301  | 0.018496936 | 0.054175658 |
| ENSG00000196118 | 54.38425118 | 0.085455775  | 0.243437103 | 0.351038417  | 0.725559527 | 0.830232541 |
| ENSG00000196123 | 130.0344452 | -0.526706509 | 0.162040556 | -3.250461008 | 0.001152181 | 0.005084132 |
| ENSG00000196132 | 8.872385761 | -2.750791809 | 0.762218932 | -3.608926116 | 0.000307467 | 0.001573196 |
| ENSG00000196141 | 54.49414945 | 0.491872524  | 0.242565951 | 2.027788822  | 0.042581806 | 0.107599681 |
| ENSG00000196150 | 92.77395258 | -0.495611937 | 0.20732534  | -2.390503435 | 0.016825292 | 0.050149691 |
| ENSG00000196151 | 32.78468194 | -0.000736232 | 0.307275977 | -0.002395995 | 0.998088275 | 0.999084016 |
| ENSG00000196152 | 44.35541704 | -0.188922652 | 0.2621535   | -0.720656608 | 0.471120816 | 0.633103807 |
| ENSG00000196154 | 241.0372936 | -0.57311561  | 0.129248151 | -4.434226761 | 9.24E-06    | 6.66E-05    |
| ENSG00000196155 | 14.93794923 | 5.018029581  | 0.911104873 | 5.50763115   | 3.64E-08    | 4.13E-07    |
| ENSG00000196159 | 606.9553486 | -1.773950879 | 0.095150561 | -18.64361968 | 1.42E-77    | 2.47E-75    |
| ENSG00000196169 | 6.351186355 | -2.22866935  | 0.820765384 | -2.715354954 | 0.006620477 | 0.022687934 |
| ENSG00000196177 | 101.4075633 | -0.329753297 | 0.180230965 | -1.829615115 | 0.067307512 | 0.154337026 |
| ENSG00000196182 | 406.2219594 | 0.076659693  | 0.097460613 | 0.786571017  | 0.431533031 | 0.597805177 |
| ENSG00000196187 | 283.2732734 | 0.241494627  | 0.116736255 | 2.06872002   | 0.038572367 | 0.098945589 |
| ENSG00000196189 | 16.61156741 | -0.501260776 | 0.459681162 | -1.090453161 | 0.275513575 | 0.443874205 |
| ENSG00000196199 | 728.1275221 | 0.015265764  | 0.088065735 | 0.173345109  | 0.862380168 | 0.921766415 |
| ENSG00000196204 | 111.532366  | 0.184563478  | 0.177887825 | 1.037527315  | 0.299490173 | 0.469943974 |
| ENSG00000196205 | 28.56523955 | 0.251859401  | 0.345130807 | 0.729750564  | 0.465542667 | 0.628131577 |
| ENSG00000196208 | 155.2220616 | -1.144989743 | 0.1518676   | -7.539394488 | 4.72E-14    | 1.07E-12    |

|                 |             |              |             |              |             |             |
|-----------------|-------------|--------------|-------------|--------------|-------------|-------------|
| ENSG00000196214 | 127.7917913 | -0.07033223  | 0.16237344  | -0.433151074 | 0.66490502  | 0.785659558 |
| ENSG00000196220 | 90.96314285 | -0.860590395 | 0.207720836 | -4.143014311 | 3.43E-05    | 0.000218859 |
| ENSG00000196227 | 319.4792849 | -0.361302315 | 0.115477796 | -3.128760045 | 0.001755456 | 0.007317178 |
| ENSG00000196230 | 5056.231132 | 0.06081054   | 0.062971176 | 0.965688491  | 0.33420008  | 0.505990311 |
| ENSG00000196233 | 980.5253304 | -0.169432848 | 0.071952772 | -2.354778604 | 0.018533744 | 0.054272151 |
| ENSG00000196235 | 1132.80359  | 0.197908607  | 0.070671019 | 2.800421022  | 0.005103599 | 0.018200117 |
| ENSG00000196236 | 378.5972256 | 0.00393368   | 0.100098945 | 0.039297914  | 0.96865287  | 0.983424201 |
| ENSG00000196247 | 535.3580738 | 0.063082059  | 0.090415444 | 0.697691193  | 0.485370337 | 0.645704813 |
| ENSG00000196262 | 1320.684114 | 0.191779662  | 0.077819279 | 2.464423519  | 0.013723385 | 0.042172913 |
| ENSG00000196263 | 19.09372818 | 0.083028509  | 0.401656108 | 0.206715414  | 0.836232118 | 0.904331203 |
| ENSG00000196284 | 40.51321235 | -0.343564934 | 0.276973673 | -1.240424516 | 0.214818418 | 0.370873549 |
| ENSG00000196290 | 171.727788  | 0.162384967  | 0.142305451 | 1.141101526  | 0.253827676 | 0.418674985 |
| ENSG00000196295 | 246.9179556 | -0.067646691 | 0.128027775 | -0.528375117 | 0.597239005 | 0.736571392 |
| ENSG00000196296 | 24.40205444 | -1.120049467 | 0.367751755 | -3.045667221 | 0.002321646 | 0.00927536  |
| ENSG00000196305 | 1901.186669 | 0.001251058  | 0.062746595 | 0.019938254  | 0.984092629 | 0.991961125 |
| ENSG00000196313 | 758.5458777 | 0.151012012  | 0.0792731   | 1.904959076  | 0.056785391 | 0.134740606 |
| ENSG00000196323 | 153.1375109 | -0.571293767 | 0.165333428 | -3.455403877 | 0.000549469 | 0.002636963 |
| ENSG00000196337 | 10.89289963 | -1.034721784 | 0.581126962 | -1.780543412 | 0.074987071 | 0.167436559 |
| ENSG00000196338 | 56.78336626 | -0.655208277 | 0.253527627 | -2.584366386 | 0.00975581  | 0.031597846 |
| ENSG00000196352 | 199.2509484 | 0.663516376  | 0.133115356 | 4.984521652  | 6.21E-07    | 5.76E-06    |
| ENSG00000196357 | 14.44015989 | 0.460605648  | 0.458556971 | 1.00446766   | 0.315153252 | 0.486585813 |
| ENSG00000196358 | 16.55145909 | 1.274011363  | 0.44148699  | 2.885727985  | 0.003905095 | 0.014488872 |
| ENSG00000196361 | 15.5754462  | 1.376958783  | 0.460439282 | 2.990532818  | 0.002784912 | 0.01083047  |
| ENSG00000196363 | 340.5031178 | 0.110003474  | 0.113996524 | 0.964972177  | 0.334558748 | 0.506275374 |
| ENSG00000196365 | 2341.486625 | 0.419132544  | 0.071280122 | 5.880076164  | 4.10E-09    | 5.27E-08    |
| ENSG00000196367 | 2320.700201 | -0.004463738 | 0.058284619 | -0.076585178 | 0.93895355  | 0.966262309 |
| ENSG00000196368 | 80.89538401 | -0.142255412 | 0.194415151 | -0.731709495 | 0.4643459   | 0.627179505 |
| ENSG00000196369 | 17.5719994  | -0.429402349 | 0.410265387 | -1.046645323 | 0.29526319  | 0.465756545 |
| ENSG00000196372 | 294.6141307 | -0.127789585 | 0.118093705 | -1.082103269 | 0.279206643 | 0.44787207  |
| ENSG00000196378 | 54.17408672 | -0.090103449 | 0.235978262 | -0.381829446 | 0.702587876 | 0.813891794 |
| ENSG00000196387 | 46.89689003 | -0.032040182 | 0.255832823 | -0.125238747 | 0.900334543 | 0.946135956 |
| ENSG00000196391 | 23.62337691 | 0.017466862  | 0.362334666 | 0.048206433  | 0.961551723 | 0.979684997 |
| ENSG00000196396 | 164.9367396 | -0.220518188 | 0.143366181 | -1.538146491 | 0.124012801 | 0.248072881 |
| ENSG00000196405 | 353.8191171 | 0.195630749  | 0.126884884 | 1.54179712   | 0.123122902 | 0.246860891 |
| ENSG00000196411 | 248.6837049 | -0.025799324 | 0.125618927 | -0.205377681 | 0.837277057 | 0.905074151 |
| ENSG00000196417 | 60.23090354 | 0.331220348  | 0.230363242 | 1.437817708  | 0.150485784 | 0.285851765 |
| ENSG00000196418 | 59.1157867  | -0.091929296 | 0.246323703 | -0.373205237 | 0.708995698 | 0.817673446 |
| ENSG00000196419 | 2610.276269 | 0.309915343  | 0.059268853 | 5.228974884  | 1.70E-07    | 1.73E-06    |
| ENSG00000196421 | 13.14275431 | -0.630533039 | 0.477957456 | -1.319224191 | 0.187094173 | 0.335389465 |
| ENSG00000196422 | 231.7024117 | -0.220159264 | 0.122836436 | -1.792296095 | 0.073085548 | 0.164182424 |
| ENSG00000196428 | 378.1534405 | 0.036982729  | 0.098984056 | 0.373623089  | 0.708684753 | 0.817516197 |
| ENSG00000196437 | 75.47588376 | 0.100198827  | 0.20708075  | 0.483863551  | 0.628482709 | 0.759031607 |
| ENSG00000196440 | 308.8532081 | 0.236391766  | 0.111806254 | 2.114298242  | 0.034489802 | 0.090337172 |
| ENSG00000196449 | 163.3012191 | 0.150396902  | 0.146583696 | 1.026013851  | 0.304885055 | 0.475857819 |
| ENSG00000196453 | 348.517477  | 0.338574012  | 0.105004957 | 3.224362182  | 0.001262536 | 0.005500882 |
| ENSG00000196455 | 222.0897009 | -0.008898506 | 0.130975037 | -0.067940475 | 0.945833019 | 0.969848951 |
| ENSG00000196456 | 66.34534773 | 0.335536521  | 0.220056718 | 1.524772903  | 0.127315751 | 0.252492278 |
| ENSG00000196458 | 89.06431017 | -0.108655962 | 0.192692912 | -0.563881471 | 0.572834801 | 0.717717124 |
| ENSG00000196459 | 70.47049513 | 0.529699281  | 0.209261148 | 2.531283452  | 0.011364597 | 0.035954615 |
| ENSG00000196465 | 209.4328591 | -0.212549666 | 0.126623986 | -1.678589286 | 0.093232116 | 0.198699975 |

|                 |             |              |             |              |             |             |
|-----------------|-------------|--------------|-------------|--------------|-------------|-------------|
| ENSG00000196470 | 79.59972472 | -0.361021599 | 0.19973371  | -1.80751461  | 0.070682079 | 0.160241062 |
| ENSG00000196476 | 93.10266622 | -0.344376953 | 0.189434719 | -1.817918883 | 0.069076532 | 0.157468036 |
| ENSG00000196482 | 125.2218068 | -2.819361613 | 0.20966656  | -13.44688257 | 3.21E-41    | 2.62E-39    |
| ENSG00000196497 | 9.865021192 | -0.272011949 | 0.550115366 | -0.494463463 | 0.620978904 | 0.753988302 |
| ENSG00000196498 | 3275.833025 | 0.364114638  | 0.061835429 | 5.888446829  | 3.90E-09    | 5.03E-08    |
| ENSG00000196504 | 1801.704459 | -0.002965913 | 0.064464351 | -0.04600858  | 0.963303411 | 0.980758355 |
| ENSG00000196505 | 161.5319959 | -0.298923913 | 0.148192284 | -2.017135472 | 0.043681378 | 0.109785706 |
| ENSG00000196507 | 161.9605926 | 0.639978418  | 0.148865813 | 4.299028799  | 1.72E-05    | 0.000116847 |
| ENSG00000196510 | 328.0660601 | -0.135347908 | 0.108247949 | -1.250350782 | 0.211171435 | 0.366275621 |
| ENSG00000196511 | 23.38260753 | -0.026868768 | 0.357165157 | -0.075227853 | 0.940033424 | 0.966948558 |
| ENSG00000196517 | 186.27983   | -1.294674357 | 0.140938462 | -9.186096809 | 4.07E-20    | 1.38E-18    |
| ENSG00000196526 | 114.7507108 | -1.497412579 | 0.182977522 | -8.18358758  | 2.76E-16    | 7.29E-15    |
| ENSG00000196531 | 1035.603017 | 0.088440301  | 0.088741322 | 0.99660788   | 0.318954879 | 0.490460776 |
| ENSG00000196535 | 493.9390455 | -0.23115226  | 0.09437267  | -2.449355939 | 0.014311195 | 0.043711535 |
| ENSG00000196544 | 78.35719489 | -0.00585098  | 0.20534857  | -0.02849292  | 0.977269015 | 0.988629033 |
| ENSG00000196547 | 629.0284818 | 0.515480118  | 0.089396035 | 5.766252562  | 8.11E-09    | 1.01E-07    |
| ENSG00000196550 | 14.76990493 | 0.050473513  | 0.448890404 | 0.112440615  | 0.910474053 | 0.951594421 |
| ENSG00000196557 | 14.24851999 | 0.817967751  | 0.47355028  | 1.727309191  | 0.084112149 | 0.183637451 |
| ENSG00000196562 | 7.81448497  | -2.272714827 | 0.726286147 | -3.129227836 | 0.001752664 | 0.007309877 |
| ENSG00000196576 | 1393.876842 | 0.258882177  | 0.075445714 | 3.431370214  | 0.00060054  | 0.002853786 |
| ENSG00000196584 | 326.7370964 | 0.380468593  | 0.106747247 | 3.564200522  | 0.000364967 | 0.001831615 |
| ENSG00000196586 | 12.38620872 | -2.459866869 | 0.599670155 | -4.102033172 | 4.10E-05    | 0.000256934 |
| ENSG00000196588 | 351.1544028 | -0.365627076 | 0.104426133 | -3.501298642 | 0.000462997 | 0.002260589 |
| ENSG00000196591 | 1062.30649  | -0.012025709 | 0.072853192 | -0.165067707 | 0.868890691 | 0.926961915 |
| ENSG00000196597 | 133.104027  | -0.456517874 | 0.158627279 | -2.877927912 | 0.004002966 | 0.014812872 |
| ENSG00000196604 | 99.66228174 | -0.013329769 | 0.196053226 | -0.067990564 | 0.945793145 | 0.969848951 |
| ENSG00000196605 | 82.92675213 | 0.388794001  | 0.204371257 | 1.902390809  | 0.057120082 | 0.135260585 |
| ENSG00000196628 | 590.1086403 | -1.075157254 | 0.089328098 | -12.03604778 | 2.30E-33    | 1.40E-31    |
| ENSG00000196632 | 136.5676014 | 0.029889598  | 0.156688074 | 0.190758603  | 0.848714723 | 0.91320534  |
| ENSG00000196636 | 58.40445677 | 0.048634578  | 0.228782497 | 0.212579977  | 0.831654591 | 0.901477895 |
| ENSG00000196642 | 1634.490991 | 0.058253274  | 0.067248995 | 0.866232622  | 0.386362607 | 0.555102336 |
| ENSG00000196646 | 22.90228117 | -0.093264602 | 0.367709524 | -0.253636624 | 0.7997763   | 0.880907053 |
| ENSG00000196652 | 192.6093299 | -0.013715396 | 0.133795261 | -0.102510329 | 0.918351615 | 0.955355281 |
| ENSG00000196655 | 117.6910653 | -0.092618767 | 0.167748884 | -0.552127471 | 0.580861022 | 0.723539485 |
| ENSG00000196663 | 129.9754545 | -0.53586798  | 0.162118502 | -3.305409147 | 0.000948378 | 0.00428356  |
| ENSG00000196668 | 20.04520072 | -0.692503731 | 0.399158406 | -1.734909551 | 0.082756827 | 0.18129837  |
| ENSG00000196670 | 279.690128  | -0.506397667 | 0.119272891 | -4.24570632  | 2.18E-05    | 0.000145274 |
| ENSG00000196678 | 89.01900265 | 0.043909234  | 0.19027221  | 0.230770611  | 0.817493014 | 0.892507031 |
| ENSG00000196683 | 891.0061818 | 0.355007701  | 0.077478628 | 4.582008083  | 4.61E-06    | 3.55E-05    |
| ENSG00000196689 | 29.94126128 | -0.281714047 | 0.328274263 | -0.858166718 | 0.390800411 | 0.559133568 |
| ENSG00000196693 | 86.23530865 | -0.049051855 | 0.187934616 | -0.261004896 | 0.794088732 | 0.877406181 |
| ENSG00000196700 | 226.404722  | 0.390207144  | 0.132317557 | 2.949020179  | 0.003187832 | 0.012165029 |
| ENSG00000196704 | 610.0725835 | 0.069426833  | 0.09279177  | 0.748200327  | 0.454339334 | 0.618301165 |
| ENSG00000196705 | 85.57041546 | -0.417163271 | 0.193330545 | -2.157772185 | 0.030945548 | 0.082587347 |
| ENSG00000196712 | 951.1812806 | -0.174629424 | 0.076922434 | -2.270201491 | 0.023195361 | 0.065112956 |
| ENSG00000196715 | 349.088175  | -0.049682336 | 0.105639746 | -0.470299654 | 0.638140945 | 0.766295498 |
| ENSG00000196739 | 442.7235811 | 0.910887049  | 0.102442565 | 8.891685301  | 6.02E-19    | 1.93E-17    |
| ENSG00000196743 | 314.9439564 | -0.227884971 | 0.118932277 | -1.916090199 | 0.055353616 | 0.132161437 |
| ENSG00000196747 | 465.3608247 | -0.129708184 | 0.545022974 | -0.237986636 | 0.811891459 | 0.889400967 |
| ENSG00000196756 | 621.2778141 | 0.26599103   | 0.09154776  | 2.905489217  | 0.003666795 | 0.013717219 |

|                 |             |              |             |              |             |             |
|-----------------|-------------|--------------|-------------|--------------|-------------|-------------|
| ENSG00000196757 | 38.44887343 | 0.09550637   | 0.280989736 | 0.339892736  | 0.733937307 | 0.836005299 |
| ENSG00000196776 | 202.8826591 | 0.498320999  | 0.130167571 | 3.828303745  | 0.000129029 | 0.000724122 |
| ENSG00000196781 | 32.13068863 | -3.934677078 | 0.502701793 | -7.827059965 | 4.99E-15    | 1.20E-13    |
| ENSG00000196782 | 366.3300162 | 0.455796035  | 0.104817731 | 4.348463098  | 1.37E-05    | 9.55E-05    |
| ENSG00000196787 | 1865.401816 | -0.545892691 | 0.076280764 | -7.15636113  | 8.28E-13    | 1.65E-11    |
| ENSG00000196792 | 404.0559174 | -0.004306686 | 0.097914077 | -0.043984342 | 0.964916885 | 0.981618445 |
| ENSG00000196810 | 94.061197   | -0.041025587 | 0.183877662 | -0.223113491 | 0.823447178 | 0.896524765 |
| ENSG00000196811 | 44.09164881 | -0.419269594 | 0.273531852 | -1.532799894 | 0.125325167 | 0.249920871 |
| ENSG00000196814 | 127.2143463 | -0.045436704 | 0.169406352 | -0.268211338 | 0.788536648 | 0.873546869 |
| ENSG00000196821 | 391.9660007 | -0.068831961 | 0.102714043 | -0.670131948 | 0.50277368  | 0.660722415 |
| ENSG00000196839 | 95.74053785 | -0.44614164  | 0.185493432 | -2.405161381 | 0.016165325 | 0.04850979  |
| ENSG00000196843 | 62.737025   | 0.134934379  | 0.219730901 | 0.614089228  | 0.539156366 | 0.689580557 |
| ENSG00000196850 | 276.0330115 | 0.107013089  | 0.115893833 | 0.923371736  | 0.355813516 | 0.527227053 |
| ENSG00000196865 | 538.2415981 | -0.408685126 | 0.089218557 | -4.58071886  | 4.63E-06    | 3.56E-05    |
| ENSG00000196867 | 53.96799257 | 0.2172671    | 0.23959542  | 0.906808234  | 0.364508215 | 0.535646709 |
| ENSG00000196872 | 12.49733326 | -1.022429324 | 0.520956932 | -1.962598559 | 0.049692838 | 0.121291972 |
| ENSG00000196876 | 34.7901425  | -0.933518755 | 0.30243446  | -3.086681176 | 0.002024046 | 0.008257847 |
| ENSG00000196890 | 155.7870173 | -0.231604679 | 0.150886974 | -1.534954758 | 0.124794941 | 0.249111062 |
| ENSG00000196911 | 99.82381249 | -0.349879191 | 0.187179525 | -1.869217217 | 0.0615926   | 0.143791134 |
| ENSG00000196912 | 300.0902409 | -0.285344147 | 0.122546126 | -2.328463224 | 0.01988752  | 0.057528829 |
| ENSG00000196914 | 1135.874359 | -0.027894566 | 0.071215841 | -0.39169047  | 0.695286932 | 0.80856822  |
| ENSG00000196923 | 679.8354562 | -0.432111891 | 0.091473024 | -4.72392703  | 2.31E-06    | 1.90E-05    |
| ENSG00000196924 | 3162.47148  | 0.241206294  | 0.068862985 | 3.502698765  | 0.00046057  | 0.002249523 |
| ENSG00000196935 | 130.661062  | 0.288310377  | 0.157431634 | 1.83133701   | 0.067050257 | 0.153847592 |
| ENSG00000196937 | 135.2815863 | 1.151361754  | 0.190925121 | 6.030436162  | 1.64E-09    | 2.22E-08    |
| ENSG00000196943 | 273.5377413 | -0.029609648 | 0.116804573 | -0.253497332 | 0.799883923 | 0.880907053 |
| ENSG00000196950 | 539.5781755 | 0.278604321  | 0.098169853 | 2.837982463  | 0.004539968 | 0.016495842 |
| ENSG00000196951 | 14.21264302 | 0.030855927  | 0.454648453 | 0.067867661  | 0.945890982 | 0.969848951 |
| ENSG00000196961 | 924.573679  | -0.001613077 | 0.088695712 | -0.018186641 | 0.98548996  | 0.992555924 |
| ENSG00000196967 | 12.12998791 | 0.568345845  | 0.541910813 | 1.048781148  | 0.294278856 | 0.46451681  |
| ENSG00000196968 | 215.692974  | 0.523645113  | 0.129481036 | 4.044183843  | 5.25E-05    | 0.000320952 |
| ENSG00000196975 | 100.2342507 | -0.298817661 | 0.186068342 | -1.60595649  | 0.10828347  | 0.223225404 |
| ENSG00000196976 | 284.3247588 | -0.011671283 | 0.117960568 | -0.098942243 | 0.921184128 | 0.956727767 |
| ENSG00000196981 | 16.01025085 | 0.235910133  | 0.431122412 | 0.547199883  | 0.584241416 | 0.726268953 |
| ENSG00000196998 | 77.51069047 | -0.077938841 | 0.204420763 | -0.381266753 | 0.703005321 | 0.814114448 |
| ENSG00000197006 | 520.1402665 | -0.075735686 | 0.092563225 | -0.818204919 | 0.413240187 | 0.581641774 |
| ENSG00000197008 | 63.45891058 | -0.747570268 | 0.227864869 | -3.280761401 | 0.001035273 | 0.00463547  |
| ENSG00000197016 | 30.50126932 | 0.204666349  | 0.319781493 | 0.640019368  | 0.522160008 | 0.676154371 |
| ENSG00000197019 | 149.5459343 | 0.237607864  | 0.148298546 | 1.602226528  | 0.109105526 | 0.224590464 |
| ENSG00000197021 | 59.32661808 | 0.611623598  | 0.237585215 | 2.574333587  | 0.010043339 | 0.032393489 |
| ENSG00000197024 | 944.9564565 | 0.529202295  | 0.073852131 | 7.165701099  | 7.74E-13    | 1.56E-11    |
| ENSG00000197037 | 126.0901379 | -0.192251601 | 0.163943853 | -1.172667333 | 0.240929236 | 0.40337701  |
| ENSG00000197043 | 716.940957  | -0.407094267 | 0.080569024 | -5.052739198 | 4.36E-07    | 4.15E-06    |
| ENSG00000197044 | 35.54364913 | -0.723466564 | 0.300381486 | -2.408492525 | 0.016018554 | 0.048172261 |
| ENSG00000197045 | 217.4081933 | 0.21332797   | 0.12728037  | 1.676047686  | 0.093728853 | 0.199516471 |
| ENSG00000197050 | 33.43904424 | 0.710435663  | 0.304031919 | 2.336714071  | 0.019454056 | 0.056460977 |
| ENSG00000197056 | 202.3684419 | -0.291612726 | 0.136023463 | -2.143841351 | 0.032045601 | 0.084916913 |
| ENSG00000197061 | 785.9118655 | -0.124055978 | 0.1770536   | -0.700669054 | 0.483509573 | 0.644083354 |
| ENSG00000197062 | 48.74570919 | -0.029372613 | 0.253718467 | -0.115768525 | 0.907835996 | 0.950649754 |
| ENSG00000197063 | 255.2195526 | 0.069954772  | 0.117277593 | 0.596488814  | 0.550848724 | 0.698621617 |

|                 |             |              |             |              |             |             |
|-----------------|-------------|--------------|-------------|--------------|-------------|-------------|
| ENSG00000197070 | 112.0418877 | 0.006858036  | 0.173244615 | 0.039585853  | 0.968423306 | 0.983405059 |
| ENSG00000197077 | 446.6993976 | -0.263334997 | 0.098903467 | -2.662545663 | 0.007755205 | 0.026055336 |
| ENSG00000197081 | 2370.442142 | -0.323494935 | 0.058358701 | -5.543216868 | 2.97E-08    | 3.41E-07    |
| ENSG00000197102 | 7122.785602 | 0.434208955  | 0.052790346 | 8.225158366  | 1.95E-16    | 5.20E-15    |
| ENSG00000197111 | 745.6297893 | 0.042884442  | 0.085114645 | 0.503843282  | 0.61437151  | 0.749042347 |
| ENSG00000197114 | 39.88576776 | 0.091711375  | 0.306482858 | 0.299238189  | 0.764758313 | 0.85830617  |
| ENSG00000197119 | 72.22918805 | -0.942215369 | 0.215084644 | -4.380672418 | 1.18E-05    | 8.35E-05    |
| ENSG00000197121 | 287.1942148 | 0.188667121  | 0.122446424 | 1.540813653  | 0.123362146 | 0.247199438 |
| ENSG00000197122 | 242.2282453 | 0.163895717  | 0.118611951 | 1.381780808  | 0.167039014 | 0.3089397   |
| ENSG00000197128 | 13.27904906 | 5.445768992  | 1.093968816 | 4.977992893  | 6.42E-07    | 5.94E-06    |
| ENSG00000197136 | 511.3931334 | 0.044566871  | 0.115676558 | 0.385271418  | 0.700036336 | 0.811739343 |
| ENSG00000197147 | 317.2007614 | 0.061291528  | 0.110389106 | 0.555231675  | 0.578736206 | 0.722173535 |
| ENSG00000197150 | 239.9606497 | 0.83626224   | 0.12350586  | 6.7710329    | 1.28E-11    | 2.23E-10    |
| ENSG00000197153 | 11.68046867 | -1.279296279 | 0.53447769  | -2.393544767 | 0.016686445 | 0.049807584 |
| ENSG00000197157 | 1817.735204 | 0.546959158  | 0.061384451 | 8.910386129  | 5.09E-19    | 1.64E-17    |
| ENSG00000197168 | 16.98179405 | -0.238400331 | 0.417689    | -0.570760377 | 0.568162085 | 0.713670107 |
| ENSG00000197170 | 831.8372368 | 0.15980614   | 0.077348995 | 2.066040297  | 0.038824675 | 0.099483803 |
| ENSG00000197182 | 129.2299925 | -0.761124398 | 0.161306868 | -4.718487233 | 2.38E-06    | 1.95E-05    |
| ENSG00000197183 | 449.2369284 | 0.233088071  | 0.094491055 | 2.466773933  | 0.01363364  | 0.041924637 |
| ENSG00000197217 | 438.5357863 | -0.104599635 | 0.100203072 | -1.04387653  | 0.296542518 | 0.46693563  |
| ENSG00000197223 | 60.18009904 | -0.497600344 | 0.231722372 | -2.147398796 | 0.031761546 | 0.08427549  |
| ENSG00000197226 | 1036.13538  | 0.364578954  | 0.074900793 | 4.867491226  | 1.13E-06    | 9.89E-06    |
| ENSG00000197256 | 584.9329676 | -0.361609355 | 0.091001239 | -3.973675086 | 7.08E-05    | 0.000421244 |
| ENSG00000197258 | 22.54840325 | -0.070529564 | 0.363545737 | -0.194004651 | 0.84617224  | 0.911097766 |
| ENSG00000197265 | 365.0558948 | -0.121896269 | 0.102406969 | -1.190312236 | 0.233923693 | 0.394468922 |
| ENSG00000197275 | 79.42300574 | -0.475129634 | 0.20550095  | -2.312055664 | 0.020774616 | 0.059603743 |
| ENSG00000197279 | 19.92315674 | -0.809215064 | 0.401909387 | -2.013426634 | 0.044069766 | 0.110507715 |
| ENSG00000197283 | 605.6679177 | 0.131441445  | 0.087352769 | 1.504719846  | 0.132396118 | 0.260398807 |
| ENSG00000197296 | 49.78398179 | -0.392663241 | 0.250884746 | -1.565114052 | 0.117556169 | 0.237838328 |
| ENSG00000197299 | 407.0238134 | -0.175636252 | 0.096636042 | -1.817502545 | 0.069140199 | 0.157587599 |
| ENSG00000197301 | 18.44197017 | -5.642920531 | 1.045762725 | -5.39598553  | 6.81E-08    | 7.38E-07    |
| ENSG00000197302 | 152.447694  | -0.679226114 | 0.150153606 | -4.523541807 | 6.08E-06    | 4.58E-05    |
| ENSG00000197312 | 554.8852411 | -0.310306208 | 0.094418846 | -3.286485924 | 0.001014458 | 0.004551293 |
| ENSG00000197321 | 407.1615614 | -1.831511064 | 0.107051188 | -17.10874113 | 1.28E-65    | 1.93E-63    |
| ENSG00000197323 | 818.0789076 | 0.026919833  | 0.084347022 | 0.319155705  | 0.749608444 | 0.848021916 |
| ENSG00000197324 | 424.1547636 | -0.301743536 | 0.101213772 | -2.981249773 | 0.002870745 | 0.01112117  |
| ENSG00000197329 | 114.0919647 | -0.058975263 | 0.170435833 | -0.346026198 | 0.729323026 | 0.832773591 |
| ENSG00000197332 | 6.945788451 | -0.850219013 | 0.694886193 | -1.223537066 | 0.221126913 | 0.378906994 |
| ENSG00000197343 | 343.8098059 | 0.113030517  | 0.110452653 | 1.023339091  | 0.306147547 | 0.477244989 |
| ENSG00000197345 | 391.7572124 | 0.867992348  | 0.125583462 | 6.911677158  | 4.79E-12    | 8.79E-11    |
| ENSG00000197355 | 192.9957676 | 0.591750171  | 0.153104809 | 3.865000548  | 0.000111089 | 0.000634078 |
| ENSG00000197362 | 350.0451994 | 0.621938247  | 0.104415805 | 5.956361172  | 2.58E-09    | 3.41E-08    |
| ENSG00000197363 | 41.87109728 | 0.087299409  | 0.278331204 | 0.313652972  | 0.753784623 | 0.851208619 |
| ENSG00000197372 | 100.6153322 | -0.219682848 | 0.176453409 | -1.244990673 | 0.213135179 | 0.36852657  |
| ENSG00000197375 | 156.7384247 | 0.264586773  | 0.146392752 | 1.807376181  | 0.070703645 | 0.160241062 |
| ENSG00000197380 | 85.55160249 | -0.241966424 | 0.216535935 | -1.117442351 | 0.263805236 | 0.430338785 |
| ENSG00000197381 | 326.0321938 | -0.431606143 | 0.106492588 | -4.052921906 | 5.06E-05    | 0.000310951 |
| ENSG00000197386 | 1148.41682  | -0.443945708 | 0.070477275 | -6.299132664 | 2.99E-10    | 4.46E-09    |
| ENSG00000197405 | 43.03597725 | -1.655621187 | 0.294412232 | -5.623479615 | 1.87E-08    | 2.21E-07    |
| ENSG00000197410 | 76.21593426 | 0.703873129  | 0.20183512  | 3.487366968  | 0.000487802 | 0.002367708 |



|                 |             |              |             |              |             |             |
|-----------------|-------------|--------------|-------------|--------------|-------------|-------------|
| ENSG00000197415 | 7.947936486 | -3.055251069 | 0.829606659 | -3.682770668 | 0.000230713 | 0.001215612 |
| ENSG00000197417 | 19.03329372 | -0.276317554 | 0.397941783 | -0.69436678  | 0.487452221 | 0.64779673  |
| ENSG00000197429 | 58.32614464 | -0.155587328 | 0.226861027 | -0.685826607 | 0.492822456 | 0.65209844  |
| ENSG00000197442 | 121.2266389 | 2.013653334  | 0.185633173 | 10.8474865   | 2.05E-27    | 1.01E-25    |
| ENSG00000197444 | 227.2790541 | -0.208362533 | 0.124484189 | -1.673807203 | 0.094168496 | 0.200179308 |
| ENSG00000197448 | 309.6260188 | 0.524733842  | 0.109784187 | 4.779685083  | 1.76E-06    | 1.48E-05    |
| ENSG00000197451 | 4955.918779 | 0.270859538  | 0.07914055  | 3.42251269   | 0.000620452 | 0.002936486 |
| ENSG00000197457 | 75.17355798 | -0.824341547 | 0.20747412  | -3.973225897 | 7.09E-05    | 0.000421861 |
| ENSG00000197467 | 26.99934806 | -1.983100953 | 0.410698582 | -4.828604332 | 1.37E-06    | 1.18E-05    |
| ENSG00000197472 | 78.10384338 | -0.302264695 | 0.207866005 | -1.454132413 | 0.145909599 | 0.279312093 |
| ENSG00000197479 | 8.294062066 | -0.482998294 | 0.613140299 | -0.787745146 | 0.430845793 | 0.597477385 |
| ENSG00000197483 | 133.0156063 | 0.067522076  | 0.166705559 | 0.405037941  | 0.685449622 | 0.801641066 |
| ENSG00000197496 | 119.9830461 | -0.238043249 | 0.174165826 | -1.366762095 | 0.171699887 | 0.314824216 |
| ENSG00000197498 | 348.9561767 | 0.250751733  | 0.110173284 | 2.275975835  | 0.022847456 | 0.064276395 |
| ENSG00000197530 | 104.7699001 | -0.236100551 | 0.178157393 | -1.325235778 | 0.185092962 | 0.332949269 |
| ENSG00000197535 | 322.807228  | 0.189761316  | 0.110523284 | 1.716935195  | 0.085991013 | 0.186694863 |
| ENSG00000197536 | 19.03044726 | -0.112881532 | 0.396776192 | -0.284496738 | 0.776029733 | 0.865699624 |
| ENSG00000197548 | 97.12699708 | -0.133251216 | 0.188896905 | -0.705417682 | 0.480550344 | 0.640992373 |
| ENSG00000197555 | 421.0914463 | -0.122245781 | 0.101460956 | -1.204855406 | 0.228259126 | 0.38696065  |
| ENSG00000197558 | 175.3057388 | 0.661906667  | 0.141310719 | 4.684051357  | 2.81E-06    | 2.27E-05    |
| ENSG00000197562 | 101.2533628 | 0.501514754  | 0.186270448 | 2.692401069  | 0.007093958 | 0.02409887  |
| ENSG00000197563 | 167.4037512 | -0.118587526 | 0.149599967 | -0.792697542 | 0.427954063 | 0.595195121 |
| ENSG00000197565 | 75.38600762 | 0.126741757  | 0.217803397 | 0.581908997  | 0.56062798  | 0.707146494 |
| ENSG00000197566 | 64.85882526 | 0.041555896  | 0.234609156 | 0.177128195  | 0.859407696 | 0.919849124 |
| ENSG00000197568 | 49.74792504 | -0.554727249 | 0.270376985 | -2.051680725 | 0.040200701 | 0.102189513 |
| ENSG00000197579 | 423.390874  | -0.235764313 | 0.101086974 | -2.332291734 | 0.019685349 | 0.057049742 |
| ENSG00000197580 | 6.349913707 | -0.487870127 | 0.732351782 | -0.666169099 | 0.505303022 | 0.662868093 |
| ENSG00000197586 | 191.6698623 | 0.180041715  | 0.133497061 | 1.348656764  | 0.177447239 | 0.322834007 |
| ENSG00000197594 | 43.35246644 | 0.666561691  | 0.290597509 | 2.293762574  | 0.02180414  | 0.061937868 |
| ENSG00000197599 | 10.9102261  | -0.324440084 | 0.523332437 | -0.619950268 | 0.535290529 | 0.686182213 |
| ENSG00000197601 | 283.8857243 | -0.190827624 | 0.118640128 | -1.608457679 | 0.107734978 | 0.222413047 |
| ENSG00000197603 | 371.6978797 | -0.518755399 | 0.105115209 | -4.935112637 | 8.01E-07    | 7.26E-06    |
| ENSG00000197619 | 29.77430255 | 0.673078312  | 0.334866767 | 2.009988384  | 0.044432418 | 0.11112039  |
| ENSG00000197620 | 15.95513179 | 0.585534407  | 0.435710314 | 1.343861708  | 0.17899311  | 0.324901173 |
| ENSG00000197622 | 442.0316551 | 0.009725729  | 0.095159032 | 0.102204998  | 0.91859396  | 0.955355281 |
| ENSG00000197653 | 57.81585398 | 1.193576702  | 0.26043878  | 4.582945365  | 4.58E-06    | 3.54E-05    |
| ENSG00000197694 | 3597.335621 | -0.08240774  | 0.057985202 | -1.421185707 | 0.155262779 | 0.292709201 |
| ENSG00000197696 | 115.3199132 | 0.920999333  | 0.177587737 | 5.18616515   | 2.15E-07    | 2.15E-06    |
| ENSG00000197702 | 68.5164626  | -0.292348112 | 0.217654813 | -1.343173198 | 0.179215898 | 0.325114685 |
| ENSG00000197712 | 341.8993962 | 1.504979281  | 0.11997643  | 12.54395786  | 4.29E-36    | 2.90E-34    |
| ENSG00000197713 | 191.745086  | 0.027685162  | 0.138195624 | 0.200333131  | 0.841220053 | 0.907713787 |
| ENSG00000197714 | 401.5772979 | -0.155661602 | 0.102319347 | -1.521331065 | 0.128176778 | 0.253805921 |
| ENSG00000197724 | 514.5710134 | 0.195381289  | 0.097074693 | 2.012690264  | 0.044147224 | 0.110600332 |
| ENSG00000197728 | 118.834188  | 0.60877054   | 0.165359125 | 3.681505581  | 0.000231861 | 0.001220745 |
| ENSG00000197744 | 18.30324583 | 0.029298973  | 0.398336401 | 0.073553342  | 0.941365798 | 0.96761052  |
| ENSG00000197746 | 2300.38773  | 0.531809824  | 0.062512783 | 8.507217213  | 1.78E-17    | 5.10E-16    |
| ENSG00000197756 | 7287.062314 | -0.207407004 | 0.06362735  | -3.259714659 | 0.001115244 | 0.004946582 |
| ENSG00000197757 | 362.6133345 | -0.324662465 | 0.102799343 | -3.158215377 | 0.001587382 | 0.006702122 |
| ENSG00000197763 | 99.18086221 | 0.002547131  | 0.181577358 | 0.014027801  | 0.988807801 | 0.994400285 |
| ENSG00000197766 | 61.84742431 | -0.597802682 | 0.224843639 | -2.658748478 | 0.007843149 | 0.026294204 |

|                 |             |              |             |              |             |             |
|-----------------|-------------|--------------|-------------|--------------|-------------|-------------|
| ENSG00000197771 | 671.7397938 | 0.064733133  | 0.081481398 | 0.794452903  | 0.426931817 | 0.594244077 |
| ENSG00000197774 | 230.1207912 | 0.024214927  | 0.124889895 | 0.193890202  | 0.846261856 | 0.911124418 |
| ENSG00000197779 | 91.94331312 | -0.202417693 | 0.189780196 | -1.066590179 | 0.286156937 | 0.455793911 |
| ENSG00000197780 | 85.73841787 | 0.62736026   | 0.20214463  | 3.103521769  | 0.001912322 | 0.007872914 |
| ENSG00000197782 | 46.22610511 | 0.074437222  | 0.260103696 | 0.286182871  | 0.774738062 | 0.865083113 |
| ENSG00000197785 | 332.99781   | 0.292392165  | 0.111853515 | 2.614063268  | 0.008947247 | 0.029367384 |
| ENSG00000197798 | 36.97749764 | -0.042552411 | 0.306671033 | -0.138755886 | 0.889643055 | 0.939610225 |
| ENSG00000197808 | 25.67172512 | 1.001078703  | 0.363914944 | 2.75085901   | 0.005943922 | 0.020697638 |
| ENSG00000197813 | 21.50442417 | -0.143294691 | 0.384906183 | -0.37228472  | 0.709680874 | 0.818195874 |
| ENSG00000197816 | 13.55718152 | -1.00832419  | 0.503040258 | -2.004460228 | 0.045020783 | 0.11226823  |
| ENSG00000197818 | 44.27350412 | 0.316557051  | 0.281263156 | 1.125483535  | 0.260384191 | 0.426544224 |
| ENSG00000197822 | 118.5581869 | -0.160422311 | 0.168177726 | -0.953885599 | 0.340141554 | 0.511833787 |
| ENSG00000197837 | 136.627238  | -0.564511028 | 0.180638557 | -3.125086014 | 0.001777531 | 0.007387271 |
| ENSG00000197841 | 27.3271063  | -0.093717443 | 0.328893323 | -0.284947845 | 0.7756841   | 0.86552026  |
| ENSG00000197852 | 12.91693533 | -0.583591574 | 0.499986891 | -1.16721375  | 0.24312406  | 0.40603539  |
| ENSG00000197857 | 11.22484327 | -2.802147668 | 0.677877343 | -4.13370899  | 3.57E-05    | 0.00022709  |
| ENSG00000197858 | 195.4114056 | 0.536654218  | 0.13768937  | 3.897571892  | 9.72E-05    | 0.000560277 |
| ENSG00000197860 | 81.32150484 | -0.126730526 | 0.204312386 | -0.620278235 | 0.535074622 | 0.685971818 |
| ENSG00000197863 | 11.95954606 | -0.544684466 | 0.504975766 | -1.078634863 | 0.280750534 | 0.449518669 |
| ENSG00000197879 | 1289.620094 | -0.325977658 | 0.070607816 | -4.616736197 | 3.90E-06    | 3.06E-05    |
| ENSG00000197885 | 77.84044213 | 0.020070598  | 0.205376086 | 0.097726069  | 0.922149815 | 0.95696206  |
| ENSG00000197892 | 67.22159974 | 0.235908953  | 0.220164774 | 1.071510891  | 0.283939776 | 0.453633078 |
| ENSG00000197894 | 281.5879558 | 0.251985593  | 0.111973512 | 2.250403588  | 0.024423337 | 0.06797595  |
| ENSG00000197903 | 3013.214755 | -0.170492485 | 0.069295573 | -2.460366178 | 0.013879532 | 0.042559657 |
| ENSG00000197905 | 239.9545457 | 0.403167639  | 0.120626573 | 3.342278813  | 0.000830936 | 0.003808206 |
| ENSG00000197912 | 611.9136233 | -0.017115079 | 0.100776677 | -0.169831748 | 0.865142458 | 0.924195157 |
| ENSG00000197930 | 1171.441191 | 0.353514259  | 0.074162945 | 4.766723604  | 1.87E-06    | 1.57E-05    |
| ENSG00000197933 | 9.460638028 | -1.736063168 | 0.624899486 | -2.778147858 | 0.005466973 | 0.019285429 |
| ENSG00000197937 | 24.18029394 | -1.673356105 | 0.386286987 | -4.33189872  | 1.48E-05    | 0.000102042 |
| ENSG00000197948 | 78.8464637  | 0.39970817   | 0.200339736 | 1.995151726  | 0.046026334 | 0.114241729 |
| ENSG00000197951 | 64.73847063 | -0.051230368 | 0.226475406 | -0.2262072   | 0.821040271 | 0.895083638 |
| ENSG00000197958 | 3784.227855 | 0.236753496  | 0.129794639 | 1.824062206  | 0.068142668 | 0.155845012 |
| ENSG00000197959 | 213.0914475 | 1.34441144   | 0.134244884 | 10.01461952  | 1.31E-23    | 5.37E-22    |
| ENSG00000197961 | 966.0804567 | 0.131300128  | 0.078592471 | 1.670645123  | 0.094791794 | 0.201317943 |
| ENSG00000197965 | 1594.902669 | 0.231441632  | 0.065442585 | 3.536560078  | 0.000405374 | 0.002006446 |
| ENSG00000197969 | 709.7799995 | -0.17388306  | 0.07904333  | -2.199844808 | 0.027817908 | 0.075787073 |
| ENSG00000197971 | 33.4528233  | -7.376030141 | 1.205650676 | -6.117883301 | 9.48E-10    | 1.32E-08    |
| ENSG00000197976 | 451.6123348 | 0.267520968  | 0.094689268 | 2.825251201  | 0.004724356 | 0.017059905 |
| ENSG00000197977 | 22.57974357 | -0.243039814 | 0.362528085 | -0.670402719 | 0.502601102 | 0.660644616 |
| ENSG00000197978 | 28.68033272 | -0.200726733 | 0.342715274 | -0.585695322 | 0.558080278 | 0.705122829 |
| ENSG00000197982 | 200.7012808 | -0.078882673 | 0.129980717 | -0.606879807 | 0.54393068  | 0.692773077 |
| ENSG00000197989 | 147.8532195 | 0.139753818  | 0.152264597 | 0.917835271  | 0.358705114 | 0.529946438 |
| ENSG00000198000 | 323.3121454 | 0.250195747  | 0.105574896 | 2.369841277  | 0.017795723 | 0.052505045 |
| ENSG00000198001 | 112.1842297 | 0.175119458  | 0.18154573  | 0.964602461  | 0.334743967 | 0.506369642 |
| ENSG00000198003 | 72.77031129 | -1.074838766 | 0.229315076 | -4.687170088 | 2.77E-06    | 2.24E-05    |
| ENSG00000198015 | 530.5937637 | -0.151174516 | 0.092810603 | -1.628849622 | 0.103344857 | 0.215160102 |
| ENSG00000198018 | 104.14092   | -0.542546196 | 0.177122001 | -3.063121421 | 0.002190412 | 0.008818281 |
| ENSG00000198026 | 386.6858296 | 0.501290806  | 0.100313046 | 4.997264329  | 5.81E-07    | 5.41E-06    |
| ENSG00000198034 | 6933.554283 | 0.126720157  | 0.063346253 | 2.000436502  | 0.04545315  | 0.113145561 |
| ENSG00000198039 | 46.24866387 | -0.64010081  | 0.267307631 | -2.394622284 | 0.016637495 | 0.04969315  |

|                 |             |              |             |              |             |             |
|-----------------|-------------|--------------|-------------|--------------|-------------|-------------|
| ENSG00000198040 | 308.3655167 | 0.130179641  | 0.108395814 | 1.200965577  | 0.229764554 | 0.388715247 |
| ENSG00000198042 | 488.7621018 | 0.101046686  | 0.090944831 | 1.111076726  | 0.266535325 | 0.433380991 |
| ENSG00000198046 | 121.7470691 | 0.485680248  | 0.160850689 | 3.019447734  | 0.00253236  | 0.009994959 |
| ENSG00000198053 | 537.9328025 | 0.280105195  | 0.092115642 | 3.040799458  | 0.002359509 | 0.009394565 |
| ENSG00000198055 | 538.6422023 | 0.116894785  | 0.088577014 | 1.319696613  | 0.186936331 | 0.335227518 |
| ENSG00000198056 | 134.1536343 | -0.476099561 | 0.161175897 | -2.953912897 | 0.003137726 | 0.011999899 |
| ENSG00000198060 | 185.9451676 | -0.296954057 | 0.135620684 | -2.189592685 | 0.02855379  | 0.077356815 |
| ENSG00000198064 | 13.03400458 | 0.18382767   | 0.478675359 | 0.38403412   | 0.700953159 | 0.812392722 |
| ENSG00000198081 | 89.14911083 | -0.279934174 | 0.188088525 | -1.488310752 | 0.136668961 | 0.266230605 |
| ENSG00000198087 | 307.8350008 | -0.202620099 | 0.110031194 | -1.841478693 | 0.06555144  | 0.151174041 |
| ENSG00000198089 | 194.5789285 | -0.205886963 | 0.135472621 | -1.519768069 | 0.128569277 | 0.254367977 |
| ENSG00000198105 | 109.7097974 | -0.376329617 | 0.168996715 | -2.226845753 | 0.025957584 | 0.071565493 |
| ENSG00000198113 | 14.90969249 | -0.342067254 | 0.444881088 | -0.768895921 | 0.441955099 | 0.607051742 |
| ENSG00000198130 | 317.1760984 | -0.100115882 | 0.109070833 | -0.91789784  | 0.358672353 | 0.529946438 |
| ENSG00000198133 | 13.53447492 | -0.29478578  | 0.474215421 | -0.621628415 | 0.534186232 | 0.685370327 |
| ENSG00000198134 | 22.25613198 | -1.825635295 | 0.414225678 | -4.407344573 | 1.05E-05    | 7.46E-05    |
| ENSG00000198142 | 402.2844712 | 0.146160398  | 0.104260706 | 1.401874248  | 0.160952802 | 0.300212987 |
| ENSG00000198146 | 1272.90748  | 0.271698182  | 0.07060704  | 3.848032468  | 0.00011907  | 0.000675517 |
| ENSG00000198157 | 549.2211    | 0.46183483   | 0.100954434 | 4.57468594   | 4.77E-06    | 3.66E-05    |
| ENSG00000198160 | 389.3178243 | -0.022449844 | 0.103892234 | -0.216087796 | 0.828919312 | 0.89997137  |
| ENSG00000198162 | 521.1727131 | 0.007756403  | 0.08942063  | 0.086740645  | 0.930877668 | 0.962535046 |
| ENSG00000198169 | 169.1127798 | 0.401504976  | 0.139626224 | 2.875569958  | 0.004032988 | 0.014912181 |
| ENSG00000198171 | 519.1063575 | 0.451929971  | 0.095843797 | 4.715276172  | 2.41E-06    | 1.98E-05    |
| ENSG00000198176 | 703.7849032 | 0.308084601  | 0.080621799 | 3.821356046  | 0.00013272  | 0.000743644 |
| ENSG00000198182 | 20.84197462 | 0.133405763  | 0.391853379 | 0.340448163  | 0.733519053 | 0.835693316 |
| ENSG00000198189 | 87.29636062 | -0.363232837 | 0.191011001 | -1.901633073 | 0.057219141 | 0.135426668 |
| ENSG00000198198 | 477.2915114 | -0.159758416 | 0.099846769 | -1.600035906 | 0.109590618 | 0.225351448 |
| ENSG00000198205 | 48.37370232 | 0.531555162  | 0.259893229 | 2.045282843  | 0.040826981 | 0.103687688 |
| ENSG00000198208 | 31.75747654 | -0.521050103 | 0.315509662 | -1.651455302 | 0.098645641 | 0.20749855  |
| ENSG00000198218 | 63.17528329 | 0.223818306  | 0.224258986 | 0.998034952  | 0.318262411 | 0.48997802  |
| ENSG00000198231 | 2100.013735 | 0.011550756  | 0.063086771 | 0.183093153  | 0.854724928 | 0.916518175 |
| ENSG00000198242 | 539.8755131 | 0.602814477  | 0.092635917 | 6.507351516  | 7.65E-11    | 1.23E-09    |
| ENSG00000198246 | 16.82304122 | 0.014079709  | 0.423315683 | 0.033260542  | 0.97346682  | 0.986330341 |
| ENSG00000198252 | 385.5638761 | 0.244680524  | 0.104381136 | 2.344106748  | 0.019072712 | 0.055527683 |
| ENSG00000198258 | 386.3656688 | 0.309549082  | 0.119248257 | 2.595837369  | 0.009436072 | 0.030728876 |
| ENSG00000198265 | 2347.352088 | 0.117043555  | 0.065161341 | 1.796211565  | 0.072460876 | 0.163170556 |
| ENSG00000198270 | 25.72587823 | -0.784325806 | 0.355573011 | -2.205808036 | 0.027397443 | 0.074786609 |
| ENSG00000198276 | 233.577806  | 0.139550825  | 0.131524629 | 1.061024287  | 0.288678864 | 0.458770449 |
| ENSG00000198301 | 284.077568  | -0.090317411 | 0.111413243 | -0.810652384 | 0.417565325 | 0.585558562 |
| ENSG00000198315 | 485.8096222 | -0.036415736 | 0.091972195 | -0.395942886 | 0.692147163 | 0.806274442 |
| ENSG00000198324 | 48.18981956 | -0.265061553 | 0.280951424 | -0.943442641 | 0.345454541 | 0.517169343 |
| ENSG00000198331 | 37.31259759 | -0.475080547 | 0.292169359 | -1.626045072 | 0.103940068 | 0.215983155 |
| ENSG00000198353 | 89.56940488 | -1.743283727 | 0.205207531 | -8.495222954 | 1.98E-17    | 5.62E-16    |
| ENSG00000198355 | 325.5219978 | 0.042297808  | 0.12180698  | 0.347252745  | 0.728401449 | 0.832196434 |
| ENSG00000198356 | 340.9123246 | 0.42841605   | 0.106530407 | 4.021537703  | 5.78E-05    | 0.000350149 |
| ENSG00000198363 | 7631.282507 | 1.406918659  | 0.055418842 | 25.38700948  | 3.51E-142   | 1.70E-139   |
| ENSG00000198369 | 1320.379871 | -0.34626181  | 0.07398399  | -4.680226229 | 2.87E-06    | 2.31E-05    |
| ENSG00000198373 | 228.6308346 | 0.054567095  | 0.127888705 | 0.426676422  | 0.669615026 | 0.788968485 |
| ENSG00000198380 | 631.0444896 | -0.093340837 | 0.083049404 | -1.123919408 | 0.261047217 | 0.427271747 |
| ENSG00000198382 | 216.0983963 | -0.151861597 | 0.131957602 | -1.150836291 | 0.249799592 | 0.413789489 |

|                 |             |              |             |              |             |             |
|-----------------|-------------|--------------|-------------|--------------|-------------|-------------|
| ENSG00000198393 | 176.0700502 | -0.057104513 | 0.141466207 | -0.403661861 | 0.686461389 | 0.802156487 |
| ENSG00000198399 | 548.6894044 | 0.202253019  | 0.086596545 | 2.335578391  | 0.019513226 | 0.056609311 |
| ENSG00000198408 | 904.2016419 | -0.216085493 | 0.078002492 | -2.770238336 | 0.005601529 | 0.019681009 |
| ENSG00000198414 | 10.78027376 | -3.480506441 | 0.784348501 | -4.437448962 | 9.10E-06    | 6.59E-05    |
| ENSG00000198417 | 13.58594508 | 0.695517743  | 0.493133637 | 1.41040418   | 0.158420372 | 0.296710795 |
| ENSG00000198420 | 183.889948  | 0.315929315  | 0.136251303 | 2.318725086  | 0.020409947 | 0.058773787 |
| ENSG00000198431 | 793.0113126 | -0.187032678 | 0.080871132 | -2.312724852 | 0.020737772 | 0.059533212 |
| ENSG00000198435 | 338.5925771 | -0.340924956 | 0.111649548 | -3.053527404 | 0.002261681 | 0.00907562  |
| ENSG00000198440 | 21.70371171 | 0.18451741   | 0.365334211 | 0.505064689  | 0.613513401 | 0.748612122 |
| ENSG00000198455 | 77.0701151  | 0.063991928  | 0.205685386 | 0.311115579  | 0.755712758 | 0.852102835 |
| ENSG00000198464 | 208.3312282 | -0.077099609 | 0.127467581 | -0.604856614 | 0.545274273 | 0.693980947 |
| ENSG00000198466 | 97.9126811  | -0.176396342 | 0.189601518 | -0.930353008 | 0.35218834  | 0.523715899 |
| ENSG00000198467 | 3256.828871 | 0.227228047  | 0.060378196 | 3.76341232   | 0.000167611 | 0.000912568 |
| ENSG00000198468 | 63.59621344 | -0.236510844 | 0.224370309 | -1.054109362 | 0.291832851 | 0.462422566 |
| ENSG00000198478 | 184.6645283 | -0.717247067 | 0.138175771 | -5.190830935 | 2.09E-07    | 2.10E-06    |
| ENSG00000198482 | 41.78984616 | 0.27172319   | 0.29453725  | 0.9225427    | 0.356245568 | 0.527477758 |
| ENSG00000198492 | 516.2718037 | 0.047093573  | 0.100130283 | 0.470322984  | 0.638124279 | 0.766295498 |
| ENSG00000198496 | 135.2801437 | -0.323117019 | 0.154694766 | -2.088739185 | 0.036731207 | 0.095140248 |
| ENSG00000198498 | 206.2163291 | -0.206558274 | 0.137420266 | -1.503113624 | 0.132809746 | 0.260993075 |
| ENSG00000198517 | 96.96129098 | 0.299257133  | 0.200455583 | 1.492884999  | 0.135467292 | 0.264550126 |
| ENSG00000198522 | 143.3903609 | -0.100106479 | 0.157298489 | -0.636410934 | 0.524508616 | 0.677870322 |
| ENSG00000198538 | 48.59969598 | -0.817541391 | 0.280436538 | -2.915245628 | 0.003554087 | 0.013380933 |
| ENSG00000198546 | 109.2740901 | 0.069088245  | 0.171728835 | 0.402310101  | 0.687455821 | 0.802917762 |
| ENSG00000198551 | 33.87563489 | 0.33106277   | 0.298026081 | 1.110851669  | 0.266632202 | 0.433380991 |
| ENSG00000198554 | 263.12829   | -0.224783152 | 0.120093897 | -1.871728359 | 0.061244194 | 0.143191943 |
| ENSG00000198556 | 54.35459286 | -0.936139858 | 0.248097507 | -3.77327395  | 0.000161119 | 0.000882011 |
| ENSG00000198561 | 182.3801406 | -0.32143148  | 0.136885805 | -2.348172476 | 0.018865783 | 0.055026506 |
| ENSG00000198563 | 464.6164602 | 0.024281702  | 0.108482243 | 0.223831124  | 0.822888711 | 0.896348169 |
| ENSG00000198576 | 558.3465679 | 3.743609697  | 0.132070444 | 28.34555246  | 9.50E-177   | 6.67E-174   |
| ENSG00000198585 | 279.9282826 | 0.145169748  | 0.1117646   | 1.298888453  | 0.193982213 | 0.344789086 |
| ENSG00000198586 | 508.2843385 | -0.277071074 | 0.090174598 | -3.072606717 | 0.002121979 | 0.008572748 |
| ENSG00000198589 | 1480.181337 | -0.206085087 | 0.064624907 | -3.18894211  | 0.001427945 | 0.006122814 |
| ENSG00000198590 | 105.4001514 | -0.295497988 | 0.182631337 | -1.618002653 | 0.105662026 | 0.218849083 |
| ENSG00000198598 | 119.3429765 | 0.100646088  | 0.187263898 | 0.537455908  | 0.590952734 | 0.731900787 |
| ENSG00000198604 | 562.8754531 | 0.34710713   | 0.092756586 | 3.742129206  | 0.000182468 | 0.000986575 |
| ENSG00000198612 | 203.9878966 | 0.060768987  | 0.138853242 | 0.437649032  | 0.661640722 | 0.783714244 |
| ENSG00000198618 | 34.23564163 | 0.472054012  | 0.309802977 | 1.523723295  | 0.127577848 | 0.252940865 |
| ENSG00000198624 | 67.51185198 | -0.514387501 | 0.21930789  | -2.345503855 | 0.019001382 | 0.055364533 |
| ENSG00000198625 | 1359.823666 | 0.125245132  | 0.069524972 | 1.801440956  | 0.071633406 | 0.161877671 |
| ENSG00000198642 | 104.0043675 | -0.311837828 | 0.1843671   | -1.691396285 | 0.090761141 | 0.19461483  |
| ENSG00000198646 | 1247.023435 | 0.13749186   | 0.071102783 | 1.933705751  | 0.053149316 | 0.127884284 |
| ENSG00000198648 | 343.8914242 | 0.254391123  | 0.108069814 | 2.353951704  | 0.018575024 | 0.054359035 |
| ENSG00000198663 | 609.3444777 | 0.305184889  | 0.088171911 | 3.461248447  | 0.000537676 | 0.002584784 |
| ENSG00000198668 | 534.0711277 | -0.337694672 | 0.088569968 | -3.812744654 | 0.000137432 | 0.000766683 |
| ENSG00000198673 | 112.7060619 | 1.14343689   | 0.174028746 | 6.570390903  | 5.02E-11    | 8.27E-10    |
| ENSG00000198677 | 733.819254  | 0.276073314  | 0.08183963  | 3.373345094  | 0.000742608 | 0.003441576 |
| ENSG00000198680 | 36.36143048 | 0.416016454  | 0.303679578 | 1.369919098  | 0.170712157 | 0.313791373 |
| ENSG00000198682 | 69.80388731 | -1.434886739 | 0.22975246  | -6.245359642 | 4.23E-10    | 6.19E-09    |
| ENSG00000198689 | 113.2170963 | 0.426513223  | 0.166694019 | 2.558659432  | 0.010507663 | 0.033591519 |
| ENSG00000198690 | 249.4694852 | 0.002339128  | 0.118903374 | 0.019672514  | 0.984304617 | 0.992000554 |

|                 |             |              |             |              |             |             |
|-----------------|-------------|--------------|-------------|--------------|-------------|-------------|
| ENSG00000198695 | 11169.88834 | 0.614292875  | 0.073520352 | 8.355412555  | 6.52E-17    | 1.80E-15    |
| ENSG00000198700 | 1973.893675 | -0.172880396 | 0.064478738 | -2.681200041 | 0.007335865 | 0.02481264  |
| ENSG00000198707 | 539.5751131 | 0.058060455  | 0.092317382 | 0.628922249  | 0.529399959 | 0.682058262 |
| ENSG00000198712 | 203273.4616 | -0.290610817 | 0.056041571 | -5.185629358 | 2.15E-07    | 2.15E-06    |
| ENSG00000198718 | 141.1674746 | -0.780882947 | 0.158306492 | -4.932728518 | 8.11E-07    | 7.34E-06    |
| ENSG00000198720 | 358.4978333 | 0.280048747  | 0.103355355 | 2.709571733  | 0.006737014 | 0.023042325 |
| ENSG00000198721 | 493.7030423 | 0.133423547  | 0.092132264 | 1.448173972  | 0.147568402 | 0.281757964 |
| ENSG00000198722 | 461.8598203 | -0.092255906 | 0.093367524 | -0.988094162 | 0.323106535 | 0.494894504 |
| ENSG00000198723 | 12.35993563 | -0.33607623  | 0.503188078 | -0.667893864 | 0.504201344 | 0.661979277 |
| ENSG00000198727 | 122138.1511 | 0.076720496  | 0.056166635 | 1.365944327  | 0.171956438 | 0.315171201 |
| ENSG00000198728 | 635.6572249 | -0.043002165 | 0.084537299 | -0.508676831 | 0.610978765 | 0.746977708 |
| ENSG00000198729 | 28.21725958 | 2.231921179  | 0.377970437 | 5.905015211  | 3.53E-09    | 4.56E-08    |
| ENSG00000198730 | 631.8810909 | 0.124746863  | 0.08348584  | 1.494227794  | 0.13511609  | 0.264011089 |
| ENSG00000198736 | 109.1609364 | 0.300395299  | 0.169154675 | 1.775861648  | 0.075755724 | 0.168804037 |
| ENSG00000198740 | 888.2064682 | -0.173348284 | 0.076951641 | -2.252691201 | 0.024278626 | 0.067653613 |
| ENSG00000198742 | 425.8424466 | 0.012150469  | 0.098970463 | 0.122768643  | 0.902290306 | 0.947258155 |
| ENSG00000198743 | 574.3919168 | 0.006818123  | 0.087087499 | 0.078290488  | 0.937596984 | 0.965856911 |
| ENSG00000198744 | 251.6131737 | -0.13910745  | 0.130734189 | -1.064047983 | 0.287306963 | 0.457312246 |
| ENSG00000198746 | 84.83769323 | -0.037675295 | 0.205308626 | -0.183505662 | 0.854401277 | 0.916445841 |
| ENSG00000198752 | 1359.554679 | 0.082191325  | 0.066361075 | 1.238547227  | 0.215513222 | 0.371844427 |
| ENSG00000198755 | 1650.307951 | 0.363596159  | 0.067819907 | 5.361201088  | 8.27E-08    | 8.81E-07    |
| ENSG00000198756 | 162.2916562 | -0.525245056 | 0.148827154 | -3.529228648 | 0.000416773 | 0.002057066 |
| ENSG00000198763 | 84071.71791 | -0.261779407 | 0.06060339  | -4.319550526 | 1.56E-05    | 0.000107289 |
| ENSG00000198780 | 185.362489  | -0.69242747  | 0.140546279 | -4.926686618 | 8.36E-07    | 7.54E-06    |
| ENSG00000198783 | 179.1020284 | -0.036555962 | 0.140083131 | -0.260959059 | 0.79412408  | 0.877406181 |
| ENSG00000198785 | 21.02862753 | 1.31858873   | 0.407091666 | 3.239046238  | 0.001199301 | 0.005254705 |
| ENSG00000198786 | 278977.6144 | -0.4080417   | 0.060747989 | -6.716958201 | 1.86E-11    | 3.18E-10    |
| ENSG00000198791 | 409.293469  | -0.044592651 | 0.099259182 | -0.449254667 | 0.653247956 | 0.77746328  |
| ENSG00000198792 | 341.5046315 | -0.322525859 | 0.110776093 | -2.911511419 | 0.003596848 | 0.013520182 |
| ENSG00000198793 | 925.97782   | -0.137937582 | 0.080835514 | -1.706398275 | 0.087933951 | 0.189769276 |
| ENSG00000198794 | 121.5810928 | 0.336385685  | 0.162044086 | 2.075889924  | 0.037904133 | 0.097513442 |
| ENSG00000198799 | 249.3012621 | -0.246902963 | 0.117760436 | -2.096654632 | 0.036024159 | 0.093640149 |
| ENSG00000198804 | 182555.3325 | -0.146661529 | 0.064577713 | -2.271085846 | 0.023141782 | 0.065001521 |
| ENSG00000198805 | 445.1565997 | 0.319926185  | 0.106065252 | 3.016314757  | 0.002558675 | 0.010084654 |
| ENSG00000198807 | 104.0141607 | -3.238745422 | 0.245181123 | -13.20960349 | 7.72E-40    | 5.99E-38    |
| ENSG00000198814 | 24.43021902 | -0.086867303 | 0.37655097  | -0.230692016 | 0.817554076 | 0.892507031 |
| ENSG00000198815 | 727.1514116 | -0.046619747 | 0.081072695 | -0.575036357 | 0.565266709 | 0.710947988 |
| ENSG00000198816 | 208.2911255 | -0.032606261 | 0.146001028 | -0.223328985 | 0.82327947  | 0.896481141 |
| ENSG00000198818 | 90.21618633 | 0.267410926  | 0.219266926 | 1.219567997  | 0.222628684 | 0.380873325 |
| ENSG00000198824 | 622.3367848 | 0.208872286  | 0.090688223 | 2.30319086   | 0.021268107 | 0.060746868 |
| ENSG00000198825 | 194.4489046 | -0.369065738 | 0.138010414 | -2.674187605 | 0.007491053 | 0.025288831 |
| ENSG00000198826 | 335.3258576 | -0.151806987 | 0.104203435 | -1.456832856 | 0.145162524 | 0.278261186 |
| ENSG00000198830 | 656.9425337 | 0.338820156  | 0.092642554 | 3.657284261  | 0.000254902 | 0.001329103 |
| ENSG00000198832 | 248.1972878 | 0.643992584  | 0.119083559 | 5.407905098  | 6.38E-08    | 6.94E-07    |
| ENSG00000198833 | 596.7294414 | 0.106642149  | 0.088679095 | 1.202562439  | 0.22914569  | 0.387901845 |
| ENSG00000198836 | 966.3998383 | 0.037594284  | 0.081565035 | 0.460911758  | 0.644861915 | 0.771188092 |
| ENSG00000198837 | 592.4217973 | -0.04303201  | 0.085798563 | -0.501546981 | 0.615986223 | 0.750390987 |
| ENSG00000198839 | 52.04249509 | 0.089188089  | 0.24985174  | 0.356964051  | 0.721118718 | 0.826834923 |
| ENSG00000198840 | 36439.2528  | -0.138386333 | 0.075945494 | -1.822179652 | 0.068427731 | 0.156267979 |
| ENSG00000198841 | 31.55969517 | 0.334997367  | 0.31234201  | 1.072533812  | 0.283480336 | 0.453071825 |

|                 |             |              |             |              |             |             |
|-----------------|-------------|--------------|-------------|--------------|-------------|-------------|
| ENSG00000198843 | 216.492737  | 0.52052495   | 0.130101784 | 4.000905552  | 6.31E-05    | 0.000379929 |
| ENSG00000198846 | 52.75950218 | 0.06580372   | 0.248442485 | 0.264865005  | 0.791113458 | 0.875349719 |
| ENSG00000198853 | 322.7283999 | -0.129447635 | 0.113413919 | -1.141373439 | 0.253714553 | 0.418654548 |
| ENSG00000198855 | 16.13984474 | 0.031576513  | 0.443641493 | 0.071175742  | 0.943257887 | 0.968637121 |
| ENSG00000198856 | 160.6168509 | 0.093350422  | 0.143667839 | 0.649765619  | 0.51584363  | 0.671096242 |
| ENSG00000198858 | 122.8967924 | 0.155472312  | 0.175539801 | 0.885681259  | 0.37578931  | 0.545716162 |
| ENSG00000198860 | 274.1317489 | -0.369595991 | 0.12219136  | -3.024730967 | 0.002488544 | 0.009849697 |
| ENSG00000198862 | 275.9330425 | -1.117575805 | 0.117105022 | -9.543363583 | 1.38E-21    | 5.08E-20    |
| ENSG00000198863 | 191.3544859 | 0.215723903  | 0.135077228 | 1.597041239  | 0.110256515 | 0.226395741 |
| ENSG00000198868 | 171.8585198 | -0.161337922 | 0.158538798 | -1.017655764 | 0.308841576 | 0.480085296 |
| ENSG00000198870 | 9.173841618 | -0.411046471 | 0.567564164 | -0.724229078 | 0.46892511  | 0.630937837 |
| ENSG00000198873 | 57.36060337 | 0.255422554  | 0.23318025  | 1.095386741  | 0.27334724  | 0.441498067 |
| ENSG00000198874 | 215.2058461 | -0.217133686 | 0.141540907 | -1.534070195 | 0.125012385 | 0.249438774 |
| ENSG00000198876 | 310.1188909 | -0.060797666 | 0.114029303 | -0.533175814 | 0.593911882 | 0.73406777  |
| ENSG00000198885 | 271.7042751 | 0.224414406  | 0.1144449   | 1.960894767  | 0.0498913   | 0.121649556 |
| ENSG00000198886 | 291546.1275 | -0.359772441 | 0.059918697 | -6.004343565 | 1.92E-09    | 2.59E-08    |
| ENSG00000198887 | 829.2781923 | -0.166598782 | 0.08498246  | -1.960390197 | 0.049950201 | 0.121750906 |
| ENSG00000198888 | 258981.7606 | -0.586962507 | 0.051925211 | -11.3039985  | 1.25E-29    | 6.72E-28    |
| ENSG00000198890 | 142.1777695 | -0.027055478 | 0.15482274  | -0.17475132  | 0.86127504  | 0.921145918 |
| ENSG00000198892 | 33.84920234 | -0.345126109 | 0.310855664 | -1.110245524 | 0.266893241 | 0.43356648  |
| ENSG00000198894 | 142.1250744 | 0.201636227  | 0.151558836 | 1.330415519  | 0.183381404 | 0.330675043 |
| ENSG00000198898 | 404.1341308 | 0.567272877  | 0.102351363 | 5.542406658  | 2.98E-08    | 3.42E-07    |
| ENSG00000198899 | 96612.45348 | -0.370474834 | 0.062389233 | -5.938121327 | 2.88E-09    | 3.77E-08    |
| ENSG00000198900 | 2343.996776 | 0.020119077  | 0.061030739 | 0.329654819  | 0.741660796 | 0.842008184 |
| ENSG00000198901 | 126.2695597 | 0.104567907  | 0.17065966  | 0.612727737  | 0.540056379 | 0.690091145 |
| ENSG00000198909 | 141.6234385 | -0.521461084 | 0.164644093 | -3.167201893 | 0.001539134 | 0.006527844 |
| ENSG00000198911 | 2771.588812 | 0.330736875  | 0.059724254 | 5.537731399  | 3.06E-08    | 3.51E-07    |
| ENSG00000198912 | 198.8218514 | 0.113622651  | 0.141584667 | 0.802506751  | 0.422259885 | 0.589889605 |
| ENSG00000198915 | 104.4061906 | -0.148739603 | 0.17215584  | -0.863982329 | 0.387597598 | 0.5563077   |
| ENSG00000198918 | 38.51707139 | 0.689526964  | 0.287179354 | 2.401032508  | 0.016348884 | 0.048976919 |
| ENSG00000198919 | 165.7776833 | -1.772609034 | 0.158655474 | -11.17269379 | 5.55E-29    | 2.85E-27    |
| ENSG00000198920 | 287.8950462 | 0.093880424  | 0.112560856 | 0.834041488  | 0.404257605 | 0.57241129  |
| ENSG00000198924 | 141.9778502 | 0.149791854  | 0.167474112 | 0.894417965  | 0.371098304 | 0.542154745 |
| ENSG00000198925 | 190.7578865 | 0.274456111  | 0.137271316 | 1.999369702  | 0.045568368 | 0.113372097 |
| ENSG00000198929 | 10.04310112 | 0.45405843   | 0.545945136 | 0.831692419  | 0.405582581 | 0.573801237 |
| ENSG00000198931 | 262.4512946 | -0.627615963 | 0.118582212 | -5.292665323 | 1.21E-07    | 1.25E-06    |
| ENSG00000198932 | 37.90528332 | -0.434235377 | 0.290742892 | -1.49353738  | 0.135296577 | 0.264290227 |
| ENSG00000198933 | 313.4163275 | -0.076118942 | 0.118717129 | -0.6411791   | 0.521406327 | 0.675726051 |
| ENSG00000198934 | 10.98140732 | -0.060143005 | 0.585290659 | -0.1027575   | 0.918155437 | 0.955355281 |
| ENSG00000198937 | 115.2309231 | 0.703718309  | 0.171405172 | 4.105583874  | 4.03E-05    | 0.000253585 |
| ENSG00000198938 | 119452.0989 | -0.245421891 | 0.057940177 | -4.235780822 | 2.28E-05    | 0.000151197 |
| ENSG00000198939 | 9.019766747 | -0.659377911 | 0.583021407 | -1.130966896 | 0.258069025 | 0.423739987 |
| ENSG00000198945 | 114.6790706 | 0.16825668   | 0.164925781 | 1.020196347  | 0.30763535  | 0.478661249 |
| ENSG00000198947 | 884.9843508 | -4.496077001 | 0.129792102 | -34.64060553 | 6.19E-263   | 6.69E-260   |
| ENSG00000198948 | 159.712827  | -0.251960904 | 0.143262883 | -1.758731212 | 0.078623173 | 0.174142921 |
| ENSG00000198951 | 261.069432  | -0.30602131  | 0.128739718 | -2.377054368 | 0.017451516 | 0.051728517 |
| ENSG00000198952 | 725.0907049 | 0.322900071  | 0.081743628 | 3.950155866  | 7.81E-05    | 0.000460762 |
| ENSG00000198954 | 166.3655124 | -0.220044692 | 0.140792116 | -1.56290493  | 0.118074958 | 0.238647329 |
| ENSG00000198960 | 66.77414727 | 0.171831737  | 0.22183419  | 0.774595371  | 0.438578794 | 0.604051016 |
| ENSG00000198961 | 589.1800866 | 0.12312781   | 0.087043433 | 1.414555989  | 0.15719872  | 0.295249422 |

|                 |             |              |             |              |             |             |
|-----------------|-------------|--------------|-------------|--------------|-------------|-------------|
| ENSG00000198964 | 85.03635711 | -0.104981172 | 0.189746486 | -0.553270706 | 0.580078057 | 0.723117407 |
| ENSG00000199377 | 112.3509841 | 0.513945094  | 0.199538746 | 2.575665649  | 0.010004734 | 0.032297953 |
| ENSG00000199568 | 20.07390202 | 0.447222289  | 0.391034913 | 1.1436889    | 0.252752679 | 0.417437186 |
| ENSG00000199719 | 9.136448328 | -0.808931087 | 0.582216741 | -1.389398535 | 0.164711595 | 0.305802773 |
| ENSG00000199753 | 44.65306667 | 0.365210798  | 0.258227711 | 1.414297466  | 0.157274581 | 0.295273461 |
| ENSG00000199879 | 89.40415519 | 0.620852406  | 0.194322446 | 3.19495981   | 0.001398503 | 0.006016776 |
| ENSG00000199883 | 131.2536736 | -0.272785537 | 0.181329335 | -1.504365177 | 0.132487366 | 0.260541792 |
| ENSG00000200087 | 240.6251644 | -0.086203659 | 0.317386557 | -0.271604633 | 0.785926037 | 0.871892516 |
| ENSG00000200091 | 15.7720745  | -0.231884159 | 0.435315297 | -0.532680935 | 0.594254466 | 0.734327425 |
| ENSG00000200169 | 154.2460162 | 0.73284183   | 0.154796312 | 4.734233147  | 2.20E-06    | 1.82E-05    |
| ENSG00000200312 | 67.56715178 | -0.377721935 | 0.246996533 | -1.529260073 | 0.126199983 | 0.251166218 |
| ENSG00000200488 | 57.85074358 | -0.236000212 | 0.237297195 | -0.994534351 | 0.31996279  | 0.49159168  |
| ENSG00000200492 | 24.1722258  | 0.233167564  | 0.372800364 | 0.625448862  | 0.531676501 | 0.683361681 |
| ENSG00000200794 | 10.72252053 | -0.848956006 | 0.574726516 | -1.477147795 | 0.139636024 | 0.270509893 |
| ENSG00000200795 | 44.7197502  | -0.199281059 | 0.267937908 | -0.743758358 | 0.457022677 | 0.62063008  |
| ENSG00000200879 | 11.00965808 | 0.652506071  | 0.579055119 | 1.126846217  | 0.259807506 | 0.425974404 |
| ENSG00000200959 | 14.79419928 | 0.177798182  | 0.447705071 | 0.397132382  | 0.691269842 | 0.805563918 |
| ENSG00000200972 | 34.44059254 | 0.827276     | 0.308329204 | 2.683093231  | 0.007294465 | 0.024708308 |
| ENSG00000200997 | 34.99597914 | -0.948243565 | 0.319266347 | -2.970070519 | 0.002977314 | 0.011461312 |
| ENSG00000201098 | 75.20689172 | -0.923287661 | 0.61696687  | -1.496494717 | 0.134524784 | 0.263178099 |
| ENSG00000201302 | 20.46947073 | -0.705623028 | 0.40653943  | -1.73568165  | 0.08262014  | 0.181055399 |
| ENSG00000201592 | 129.1278316 | -0.488801072 | 0.174845149 | -2.795622722 | 0.005179983 | 0.018449093 |
| ENSG00000201772 | 25.29206436 | -0.089049676 | 0.681404495 | -0.130685483 | 0.896024117 | 0.943582785 |
| ENSG00000201782 | 9.85693022  | -0.438242954 | 0.566950663 | -0.772982522 | 0.439532724 | 0.604795228 |
| ENSG00000201793 | 16.3153824  | -0.960947116 | 0.477132077 | -2.014006524 | 0.044008849 | 0.110430921 |
| ENSG00000201801 | 37.13133285 | 0.543699737  | 0.289202867 | 1.879994286  | 0.060108857 | 0.141030418 |
| ENSG00000201998 | 27.55965006 | -0.439220766 | 0.345112506 | -1.27268864  | 0.20312855  | 0.356089698 |
| ENSG00000202058 | 8.265050698 | -0.3631392   | 0.593323027 | -0.612042991 | 0.540509314 | 0.690408328 |
| ENSG00000202233 | 14.33051267 | 0.297260533  | 0.4812361   | 0.617702067  | 0.536771749 | 0.687520084 |
| ENSG00000202360 | 8.107021748 | -1.173728863 | 0.643078924 | -1.825170782 | 0.067975261 | 0.155563457 |
| ENSG00000202512 | 36.39643874 | -0.165619894 | 0.299322309 | -0.553316239 | 0.580046883 | 0.723117407 |
| ENSG00000202515 | 83.282225   | -0.360656113 | 0.22641445  | -1.592902365 | 0.111182096 | 0.227896527 |
| ENSG00000202538 | 26.81041732 | 0.190330117  | 0.375459168 | 0.506926274  | 0.61220655  | 0.747774297 |
| ENSG00000203279 | 13.78591755 | -0.047059521 | 0.476731368 | -0.098712868 | 0.921366251 | 0.956727767 |
| ENSG00000203392 | 9.294685639 | -0.192342697 | 0.557490573 | -0.345015156 | 0.730082976 | 0.833168866 |
| ENSG00000203485 | 190.1733387 | 0.612486563  | 0.151561364 | 4.041178751  | 5.32E-05    | 0.000324669 |
| ENSG00000203499 | 35.04788641 | 0.758011972  | 0.294090992 | 2.577474299  | 0.009952528 | 0.032160838 |
| ENSG00000203644 | 30.67327055 | -0.257385073 | 0.332988924 | -0.772953858 | 0.439549689 | 0.604795228 |
| ENSG00000203645 | 13.70287417 | -1.295002935 | 0.493002421 | -2.626767903 | 0.008620011 | 0.028490657 |
| ENSG00000203647 | 6.907462451 | -1.622038491 | 0.735835419 | -2.204349571 | 0.027499769 | 0.07502219  |
| ENSG00000203666 | 263.4844812 | -1.046818579 | 0.125458466 | -8.343945339 | 7.19E-17    | 1.96E-15    |
| ENSG00000203667 | 434.4764726 | 0.053838686  | 0.096448901 | 0.558209436  | 0.576701378 | 0.720722799 |
| ENSG00000203668 | 180.4362171 | 0.075858024  | 0.146501951 | 0.517795316  | 0.604601087 | 0.741943439 |
| ENSG00000203705 | 82.96793199 | -0.017450535 | 0.198003644 | -0.088132392 | 0.929771451 | 0.961886845 |
| ENSG00000203709 | 46.98664768 | -0.028621423 | 0.277528267 | -0.103129759 | 0.917859987 | 0.955355281 |
| ENSG00000203737 | 9.883293763 | -0.392497522 | 0.550260955 | -0.713293426 | 0.475664205 | 0.636590614 |
| ENSG00000203739 | 47.58446163 | -0.014539307 | 0.264153809 | -0.055041065 | 0.956105748 | 0.976402577 |
| ENSG00000203760 | 72.14578309 | -0.004196413 | 0.214817221 | -0.019534808 | 0.98441447  | 0.992000554 |
| ENSG00000203761 | 10.06234584 | 0.148745204  | 0.564684389 | 0.263412991  | 0.792232279 | 0.876120833 |
| ENSG00000203778 | 13.26717127 | 1.333292316  | 0.50028696  | 2.665055104  | 0.007697571 | 0.025886468 |

|                 |             |              |             |              |             |             |
|-----------------|-------------|--------------|-------------|--------------|-------------|-------------|
| ENSG00000203791 | 83.52605401 | -0.228913855 | 0.206050717 | -1.11095879  | 0.266586088 | 0.433380991 |
| ENSG00000203799 | 10.42882151 | -0.642107335 | 0.558831939 | -1.149016888 | 0.250549017 | 0.414688588 |
| ENSG00000203804 | 11.49217359 | -0.05745452  | 0.509423589 | -0.112783392 | 0.910202286 | 0.951381168 |
| ENSG00000203808 | 13.58470739 | -2.361481544 | 0.564593434 | -4.182623109 | 2.88E-05    | 0.000186968 |
| ENSG00000203814 | 3901.332145 | -0.180448755 | 0.06268477  | -2.878669833 | 0.003993562 | 0.014785863 |
| ENSG00000203865 | 39.07248465 | -0.457554993 | 0.289332947 | -1.581413379 | 0.11378355  | 0.231839783 |
| ENSG00000203867 | 498.1692851 | 0.452528409  | 0.096924647 | 4.668868268  | 3.03E-06    | 2.43E-05    |
| ENSG00000203872 | 24.85781626 | -0.045875556 | 0.369619816 | -0.124115521 | 0.90122381  | 0.946716337 |
| ENSG00000203875 | 63.58296324 | 0.198397589  | 0.223610341 | 0.887246931  | 0.37494597  | 0.54488579  |
| ENSG00000203877 | 53.57887601 | 0.911406453  | 0.251639037 | 3.621880231  | 0.00029247  | 0.001504067 |
| ENSG00000203879 | 752.6052744 | 0.139409529  | 0.082209412 | 1.695785489  | 0.089926512 | 0.193179035 |
| ENSG00000203880 | 114.9518685 | -0.044970366 | 0.164630479 | -0.273159421 | 0.784730672 | 0.871115267 |
| ENSG00000203883 | 260.8835014 | 0.786989589  | 0.126440434 | 6.224192417  | 4.84E-10    | 7.02E-09    |
| ENSG00000203930 | 3328.164959 | -0.257314452 | 0.081913386 | -3.141299197 | 0.001682001 | 0.007052856 |
| ENSG00000203950 | 356.9743974 | 0.001010215  | 0.115268925 | 0.008763985  | 0.993007441 | 0.996412282 |
| ENSG00000203965 | 29.29532452 | -0.167123304 | 0.322524302 | -0.518172749 | 0.604337746 | 0.741751513 |
| ENSG00000203993 | 53.66184169 | 0.129662201  | 0.249032275 | 0.520664243  | 0.602600688 | 0.740701073 |
| ENSG00000203995 | 124.3303432 | 0.059934432  | 0.160948935 | 0.372381665  | 0.709608703 | 0.818195874 |
| ENSG00000204019 | 16.42423136 | 0.300419603  | 0.424766046 | 0.707258986  | 0.479405549 | 0.640073162 |
| ENSG00000204052 | 42.64059468 | 0.896993269  | 0.294908779 | 3.04159568   | 0.002353278 | 0.009380389 |
| ENSG00000204054 | 380.2225688 | -0.106892699 | 0.102290641 | -1.04499002  | 0.296027582 | 0.466490851 |
| ENSG00000204060 | 50.51997055 | -0.571850121 | 0.255189262 | -2.240886303 | 0.025033441 | 0.06937162  |
| ENSG00000204070 | 96.2121162  | 0.054730016  | 0.199391181 | 0.274485642  | 0.783711436 | 0.870948935 |
| ENSG00000204084 | 143.4578431 | -0.055388713 | 0.157216041 | -0.352309551 | 0.724606126 | 0.829479444 |
| ENSG00000204104 | 416.056059  | -0.227555975 | 0.097808884 | -2.326536858 | 0.019989929 | 0.057736276 |
| ENSG00000204116 | 90.53637325 | 0.335915539  | 0.190756229 | 1.760967605  | 0.078243886 | 0.173549956 |
| ENSG00000204120 | 1871.858292 | 0.125487631  | 0.063220045 | 1.984934206  | 0.047151792 | 0.116424894 |
| ENSG00000204128 | 8.561206707 | -2.312926297 | 0.734157719 | -3.150448789 | 0.001630198 | 0.006866386 |
| ENSG00000204130 | 178.7846254 | -0.25587306  | 0.144422322 | -1.771700218 | 0.076444334 | 0.170176474 |
| ENSG00000204131 | 87.3872833  | -0.958119418 | 0.201442441 | -4.756293736 | 1.97E-06    | 1.64E-05    |
| ENSG00000204138 | 802.4732447 | -0.388379042 | 0.085015997 | -4.568305439 | 4.92E-06    | 3.77E-05    |
| ENSG00000204147 | 51.71024066 | -0.260271413 | 0.251874087 | -1.033339383 | 0.301445103 | 0.471851946 |
| ENSG00000204160 | 299.3279403 | 0.61368764   | 0.116686172 | 5.259300473  | 1.45E-07    | 1.49E-06    |
| ENSG00000204172 | 18.19336254 | -0.027589398 | 0.401812825 | -0.068662314 | 0.945258417 | 0.969665557 |
| ENSG00000204178 | 110.3362512 | -0.420822444 | 0.171473046 | -2.45416089  | 0.014121378 | 0.043197518 |
| ENSG00000204209 | 221.9122722 | -0.101679934 | 0.128645972 | -0.79038568  | 0.429302563 | 0.596126245 |
| ENSG00000204217 | 624.5910625 | -0.324986777 | 0.090530934 | -3.589787077 | 0.000330948 | 0.001675858 |
| ENSG00000204219 | 15.81275108 | -0.354565877 | 0.446739954 | -0.793673979 | 0.427385252 | 0.594580632 |
| ENSG00000204220 | 482.7335378 | -0.045375491 | 0.092937179 | -0.488238301 | 0.625381058 | 0.756912608 |
| ENSG00000204227 | 208.0852301 | -0.032150362 | 0.131307239 | -0.244848356 | 0.80657385  | 0.885690308 |
| ENSG00000204228 | 44.75898468 | -1.329602047 | 0.286340043 | -4.643437333 | 3.43E-06    | 2.73E-05    |
| ENSG00000204231 | 186.848363  | 0.401301405  | 0.146158098 | 2.74566657   | 0.00603881  | 0.020955328 |
| ENSG00000204237 | 131.4819491 | 0.006777756  | 0.163358082 | 0.041490178  | 0.966905123 | 0.982787985 |
| ENSG00000204248 | 15.6262836  | -0.028400369 | 0.450742765 | -0.06300793  | 0.949760189 | 0.972113187 |
| ENSG00000204252 | 5.017611145 | -5.60678661  | 1.331563883 | -4.210677898 | 2.55E-05    | 0.000167515 |
| ENSG00000204253 | 20.37877078 | 0.747125363  | 0.397766121 | 1.878303166  | 0.060339704 | 0.141477519 |
| ENSG00000204256 | 2073.029739 | -0.164474979 | 0.061992354 | -2.653149423 | 0.007974456 | 0.026696053 |
| ENSG00000204257 | 7.38916989  | -1.317764969 | 0.682442291 | -1.930954437 | 0.053488687 | 0.128436853 |
| ENSG00000204262 | 3469.277549 | -2.061405763 | 0.058384474 | -35.30743048 | 4.52E-273   | 6.34E-270   |
| ENSG00000204267 | 114.3718411 | 0.219014595  | 0.18073463  | 1.211802053  | 0.225588162 | 0.383961822 |



|                 |             |              |             |              |             |             |
|-----------------|-------------|--------------|-------------|--------------|-------------|-------------|
| ENSG00000204271 | 77.9830638  | -0.363724663 | 0.20750923  | -1.752811971 | 0.079634288 | 0.175828802 |
| ENSG00000204272 | 372.9500579 | 0.212245491  | 0.102055742 | 2.079701613  | 0.03755291  | 0.096772285 |
| ENSG00000204301 | 11.32774922 | -1.230553274 | 0.538633016 | -2.284585679 | 0.022337133 | 0.06303128  |
| ENSG00000204304 | 561.6302773 | 0.085289234  | 0.088376954 | 0.965061934  | 0.334513791 | 0.506275374 |
| ENSG00000204305 | 30.20758424 | 0.14708776   | 0.319758445 | 0.459996481  | 0.645518746 | 0.771726296 |
| ENSG00000204308 | 190.3773311 | -0.061756694 | 0.14513187  | -0.425521248 | 0.670456736 | 0.789629057 |
| ENSG00000204310 | 584.2409686 | -0.371742942 | 0.087438504 | -4.251478763 | 2.12E-05    | 0.000141781 |
| ENSG00000204311 | 13.9146102  | -0.540013247 | 0.463896384 | -1.164081605 | 0.244390943 | 0.407618092 |
| ENSG00000204314 | 123.2327201 | 0.131331845  | 0.165878715 | 0.791734163  | 0.428515698 | 0.595563472 |
| ENSG00000204315 | 44.88793014 | -0.237452089 | 0.259796551 | -0.91399246  | 0.360720808 | 0.532029104 |
| ENSG00000204316 | 26.53687193 | 0.127778534  | 0.3527803   | 0.362204279  | 0.717199382 | 0.823876127 |
| ENSG00000204344 | 47.49592744 | 0.100026877  | 0.259969329 | 0.384764147  | 0.700412165 | 0.811974059 |
| ENSG00000204348 | 69.902546   | 0.824948425  | 0.220507103 | 3.741142193  | 0.000183186 | 0.000989697 |
| ENSG00000204351 | 513.5127085 | 0.410114991  | 0.092436675 | 4.436712929  | 9.13E-06    | 6.60E-05    |
| ENSG00000204356 | 348.9973972 | 0.410972639  | 0.104418183 | 3.935834039  | 8.29E-05    | 0.000487694 |
| ENSG00000204366 | 73.07833702 | -0.245539093 | 0.209276163 | -1.17327788  | 0.24068439  | 0.403207349 |
| ENSG00000204370 | 41.31568553 | -0.018965727 | 0.26987909  | -0.070274902 | 0.943974858 | 0.968874385 |
| ENSG00000204371 | 763.1196751 | 0.310958717  | 0.078688283 | 3.951779162  | 7.76E-05    | 0.000458032 |
| ENSG00000204386 | 798.9223642 | 0.195335806  | 0.081967917 | 2.383076376  | 0.017168632 | 0.051051603 |
| ENSG00000204387 | 201.3637141 | 0.103076961  | 0.131262721 | 0.785272167  | 0.432294011 | 0.598623223 |
| ENSG00000204388 | 320.9636266 | 0.112956604  | 0.109285968 | 1.03358744   | 0.301329074 | 0.471828057 |
| ENSG00000204392 | 275.7077321 | 0.146064765  | 0.139619416 | 1.046163703  | 0.295485458 | 0.465897882 |
| ENSG00000204394 | 1349.535345 | 0.361608162  | 0.06601445  | 5.477712247  | 4.31E-08    | 4.82E-07    |
| ENSG00000204396 | 10.08310909 | 1.264986124  | 0.595601957 | 2.123878388  | 0.033680314 | 0.088519515 |
| ENSG00000204406 | 447.5814005 | -0.215611355 | 0.097743072 | -2.205899112 | 0.027391064 | 0.074783728 |
| ENSG00000204410 | 58.42103707 | 0.296916362  | 0.234144499 | 1.268090273  | 0.204765715 | 0.358155148 |
| ENSG00000204427 | 12.5031523  | -0.049098019 | 0.500716887 | -0.098055449 | 0.921888264 | 0.956832011 |
| ENSG00000204435 | 15.03980349 | -0.636239282 | 0.448212222 | -1.419504536 | 0.155751975 | 0.293237903 |
| ENSG00000204438 | 133.4252909 | 0.040604564  | 0.158165267 | 0.256722382  | 0.797393092 | 0.879045586 |
| ENSG00000204439 | 86.82738477 | -0.508218857 | 0.19618314  | -2.590532785 | 0.009582749 | 0.031137839 |
| ENSG00000204444 | 10.06155444 | -0.780418528 | 0.572709467 | -1.36267789  | 0.172984049 | 0.316650919 |
| ENSG00000204463 | 2093.280472 | 0.26381216   | 0.070063099 | 3.765351012  | 0.000166315 | 0.00090657  |
| ENSG00000204469 | 5435.269181 | 0.091665061  | 0.075920369 | 1.207384298  | 0.22728418  | 0.385773426 |
| ENSG00000204498 | 118.7199723 | 0.6952909    | 0.169268526 | 4.10762069   | 4.00E-05    | 0.000251697 |
| ENSG00000204514 | 107.4601069 | -0.186951411 | 0.181276494 | -1.031305312 | 0.302397668 | 0.473079412 |
| ENSG00000204516 | 494.2715552 | -0.106682533 | 0.097075135 | -1.098968679 | 0.271781728 | 0.439474839 |
| ENSG00000204519 | 113.5886083 | -0.120846284 | 0.175928454 | -0.68690585  | 0.49214206  | 0.651504997 |
| ENSG00000204520 | 236.3507721 | 0.49812948   | 0.126865911 | 3.926424978  | 8.62E-05    | 0.000503995 |
| ENSG00000204524 | 137.0319587 | 0.319014034  | 0.153978119 | 2.071814069  | 0.038282784 | 0.0982925   |
| ENSG00000204525 | 1437.115173 | 0.881429387  | 0.076871294 | 11.46630094  | 1.95E-30    | 1.08E-28    |
| ENSG00000204536 | 229.9309452 | 0.163585658  | 0.129625361 | 1.261988057  | 0.206953084 | 0.3608377   |
| ENSG00000204560 | 455.3048145 | 0.027104956  | 0.096044749 | 0.282211739  | 0.777781158 | 0.86696492  |
| ENSG00000204564 | 206.5903836 | 0.489183627  | 0.136227332 | 3.590935976  | 0.000329493 | 0.001669088 |
| ENSG00000204568 | 226.6408356 | 0.092710834  | 0.125218238 | 0.740394016  | 0.459060949 | 0.62242959  |
| ENSG00000204569 | 628.9176175 | -0.256791682 | 0.082927847 | -3.096567569 | 0.001957752 | 0.008030158 |
| ENSG00000204574 | 1299.026486 | -0.048445681 | 0.079394091 | -0.61019252  | 0.541734284 | 0.69122913  |
| ENSG00000204576 | 242.2676645 | -0.454378619 | 0.124015512 | -3.663885363 | 0.000248418 | 0.001297705 |
| ENSG00000204580 | 241.292136  | -0.238100903 | 0.122944823 | -1.936648469 | 0.052788329 | 0.127211813 |
| ENSG00000204584 | 12.5415799  | -0.942475424 | 0.511852134 | -1.841304081 | 0.06557701  | 0.151208185 |
| ENSG00000204590 | 532.111271  | 0.087632479  | 0.102181558 | 0.857615406  | 0.391104865 | 0.559455198 |

|                 |             |              |             |              |             |             |
|-----------------|-------------|--------------|-------------|--------------|-------------|-------------|
| ENSG00000204592 | 227.8925859 | -0.274313953 | 0.124727006 | -2.199314822 | 0.027855544 | 0.075860185 |
| ENSG00000204599 | 41.796551   | 0.144853342  | 0.27040229  | 0.535695692  | 0.592168881 | 0.732558017 |
| ENSG00000204604 | 14.1919177  | 0.03944707   | 0.489861639 | 0.080526963  | 0.935818153 | 0.964731953 |
| ENSG00000204611 | 75.6558739  | -0.164675301 | 0.200792021 | -0.820128709 | 0.412142738 | 0.580465208 |
| ENSG00000204619 | 195.7066034 | 0.280901135  | 0.146473483 | 1.917761018  | 0.055141321 | 0.131782491 |
| ENSG00000204623 | 92.76783195 | -0.361360399 | 0.200370162 | -1.803464123 | 0.071315355 | 0.161367073 |
| ENSG00000204628 | 12615.51588 | 0.193067006  | 0.130338259 | 1.481276548  | 0.138532895 | 0.268929184 |
| ENSG00000204634 | 99.62727115 | -0.280548912 | 0.181510035 | -1.545638575 | 0.122191879 | 0.24544964  |
| ENSG00000204650 | 71.9179454  | -0.656583485 | 0.211437989 | -3.10532411  | 0.001900706 | 0.007834912 |
| ENSG00000204673 | 920.1188797 | 0.557667956  | 0.081105525 | 6.875831924  | 6.16E-12    | 1.11E-10    |
| ENSG00000204681 | 506.6544646 | 0.379183924  | 0.102001847 | 3.717422143  | 0.000201266 | 0.001076202 |
| ENSG00000204682 | 166.9913779 | -0.874498951 | 0.147884821 | -5.913378711 | 3.35E-09    | 4.35E-08    |
| ENSG00000204685 | 34.57672527 | 0.341928111  | 0.320971072 | 1.06529261   | 0.286743536 | 0.456572937 |
| ENSG00000204706 | 6.904214733 | -1.621260263 | 0.734843324 | -2.206266574 | 0.02736534  | 0.074730083 |
| ENSG00000204713 | 611.165802  | 0.065105639  | 0.086780189 | 0.750236188  | 0.453112467 | 0.617396281 |
| ENSG00000204745 | 10.3817789  | 0.238387294  | 0.546496903 | 0.43620978   | 0.662684533 | 0.784604829 |
| ENSG00000204758 | 10.20180846 | -0.473120445 | 0.564711314 | -0.837809396 | 0.402137761 | 0.570588801 |
| ENSG00000204764 | 150.5884785 | -0.463013381 | 0.147000583 | -3.149738394 | 0.001634167 | 0.006876916 |
| ENSG00000204815 | 24.0664236  | -0.583139422 | 0.363622268 | -1.603695573 | 0.108781172 | 0.223988438 |
| ENSG00000204839 | 144.157521  | 0.26763225   | 0.159208912 | 1.68101299   | 0.092760391 | 0.198025109 |
| ENSG00000204842 | 2181.358102 | 0.053406259  | 0.061113441 | 0.873887292  | 0.382179636 | 0.551631458 |
| ENSG00000204843 | 848.3646447 | 0.262448653  | 0.078215    | 3.355477249  | 0.000792282 | 0.003644133 |
| ENSG00000204851 | 7.634034676 | -6.214211535 | 1.287131322 | -4.827954558 | 1.38E-06    | 1.19E-05    |
| ENSG00000204852 | 156.8700694 | -0.27462469  | 0.144355346 | -1.902421327 | 0.057116095 | 0.135260585 |
| ENSG00000204856 | 205.4705257 | 0.208878253  | 0.130102992 | 1.605483849  | 0.108387365 | 0.223374019 |
| ENSG00000204859 | 74.13679246 | -0.450438524 | 0.207552902 | -2.170234772 | 0.029989065 | 0.080435267 |
| ENSG00000204860 | 17.59826694 | 0.542785965  | 0.431672014 | 1.25740365   | 0.208607508 | 0.363066493 |
| ENSG00000204882 | 52.91205858 | 0.630785306  | 0.269496129 | 2.340609895  | 0.019252272 | 0.055967852 |
| ENSG00000204899 | 171.1487106 | 0.237696223  | 0.16222797  | 1.465198779  | 0.142866693 | 0.275023768 |
| ENSG00000204920 | 57.28748835 | -0.020827109 | 0.231682867 | -0.089894905 | 0.92837073  | 0.96093314  |
| ENSG00000204922 | 152.0939429 | -0.042296303 | 0.150661602 | -0.280737112 | 0.778912042 | 0.867881133 |
| ENSG00000204923 | 15.94059015 | -0.858069929 | 0.442745343 | -1.938066527 | 0.052615107 | 0.126925022 |
| ENSG00000204929 | 22.25830932 | -1.476374022 | 0.392726476 | -3.759293334 | 0.000170394 | 0.000926286 |
| ENSG00000204934 | 47.76759703 | 0.182362184  | 0.27090072  | 0.673169799  | 0.500839272 | 0.659105233 |
| ENSG00000204946 | 109.2629714 | 0.348935646  | 0.176786426 | 1.97376945   | 0.048407964 | 0.118982795 |
| ENSG00000204947 | 34.43253242 | -0.685507396 | 0.299605553 | -2.28803301  | 0.022135599 | 0.062613523 |
| ENSG00000204954 | 57.47345906 | 0.288528749  | 0.233850701 | 1.233816052  | 0.217271457 | 0.374066939 |
| ENSG00000204977 | 153.4525919 | -0.091296571 | 0.14738132  | -0.619458224 | 0.535614535 | 0.686413409 |
| ENSG00000204991 | 143.4611824 | 0.205368718  | 0.155082305 | 1.324256295  | 0.18541794  | 0.333320426 |
| ENSG00000205002 | 125.0887046 | -3.251103623 | 0.222421115 | -14.61688394 | 2.19E-48    | 2.25E-46    |
| ENSG00000205041 | 15.80101123 | -0.681686612 | 0.435924172 | -1.563773369 | 0.117870801 | 0.238303272 |
| ENSG00000205060 | 435.1305199 | 0.257724276  | 0.094516672 | 2.726759963  | 0.006395955 | 0.022025981 |
| ENSG00000205084 | 82.20681227 | -0.072917526 | 0.198859768 | -0.366678123 | 0.713859127 | 0.821528813 |
| ENSG00000205085 | 25.85188428 | -0.568927651 | 0.346069081 | -1.643971343 | 0.100182122 | 0.210007203 |
| ENSG00000205116 | 12.74832161 | 0.99877056   | 0.501609373 | 1.991132171  | 0.046466358 | 0.115137226 |
| ENSG00000205133 | 149.6596661 | 0.374388109  | 0.153282059 | 2.442478333  | 0.014586805 | 0.044427765 |
| ENSG00000205138 | 46.31904643 | 0.050565162  | 0.267037597 | 0.189355966  | 0.849813834 | 0.914037896 |
| ENSG00000205155 | 10.03435689 | -0.296415773 | 0.571485477 | -0.518675951 | 0.603986735 | 0.741561198 |
| ENSG00000205189 | 393.7743169 | -0.301455501 | 0.098540026 | -3.05921882  | 0.00221915  | 0.008926804 |
| ENSG00000205208 | 164.3623227 | -0.580995436 | 0.152258262 | -3.815854902 | 0.000135712 | 0.000758595 |

|                 |             |              |             |              |             |             |
|-----------------|-------------|--------------|-------------|--------------|-------------|-------------|
| ENSG00000205213 | 401.7233848 | 0.765425489  | 0.109445862 | 6.993644881  | 2.68E-12    | 5.09E-11    |
| ENSG00000205250 | 481.5437483 | 0.406992391  | 0.092724971 | 4.389242594  | 1.14E-05    | 8.06E-05    |
| ENSG00000205268 | 135.5849218 | -0.480477653 | 0.160073626 | -3.001604104 | 0.002685612 | 0.01050379  |
| ENSG00000205269 | 62.70638224 | 0.619304965  | 0.224939443 | 2.753207516  | 0.005901448 | 0.020575238 |
| ENSG00000205302 | 605.6425906 | 0.102474262  | 0.090619629 | 1.130817496  | 0.258131914 | 0.423744186 |
| ENSG00000205309 | 12.3930586  | -0.354560691 | 0.502426398 | -0.705696779 | 0.480376724 | 0.6408825   |
| ENSG00000205323 | 11.13711265 | -0.927988657 | 0.563486063 | -1.646870646 | 0.099584637 | 0.209066715 |
| ENSG00000205334 | 10.94370668 | -0.708450025 | 0.555021246 | -1.27643767  | 0.201800847 | 0.354248501 |
| ENSG00000205336 | 22.58544918 | 1.535148527  | 0.38589006  | 3.978201787  | 6.94E-05    | 0.000414888 |
| ENSG00000205339 | 2108.464983 | -0.31939674  | 0.063782805 | -5.007568119 | 5.51E-07    | 5.18E-06    |
| ENSG00000205352 | 171.7448815 | 0.044803495  | 0.139300359 | 0.321632303  | 0.747731269 | 0.846500736 |
| ENSG00000205356 | 106.2377484 | -0.10403802  | 0.17636407  | -0.589904846 | 0.555254445 | 0.702355623 |
| ENSG00000205363 | 40.39910952 | -1.144732376 | 0.291172881 | -3.931452586 | 8.44E-05    | 0.000496046 |
| ENSG00000205423 | 44.3968119  | -0.471100592 | 0.274817292 | -1.714231986 | 0.086486129 | 0.187566875 |
| ENSG00000205464 | 22.30991348 | -1.210050618 | 0.385346478 | -3.140162651 | 0.001688541 | 0.007078165 |
| ENSG00000205476 | 461.4020227 | -0.147940783 | 0.094854197 | -1.559665118 | 0.118839039 | 0.239979424 |
| ENSG00000205517 | 130.8508782 | -2.350031976 | 0.191955721 | -12.24257324 | 1.84E-34    | 1.17E-32    |
| ENSG00000205531 | 745.3567109 | -0.055443905 | 0.082957585 | -0.6683404   | 0.50391633  | 0.661666918 |
| ENSG00000205542 | 17.59323249 | -2.389664448 | 0.513682843 | -4.652023095 | 3.29E-06    | 2.62E-05    |
| ENSG00000205544 | 16.80422326 | -0.47440755  | 0.451385526 | -1.051003016 | 0.293257205 | 0.46389459  |
| ENSG00000205559 | 22.33447967 | -0.200803092 | 0.381163214 | -0.526816558 | 0.598320983 | 0.737311593 |
| ENSG00000205581 | 1551.509584 | 0.028663232  | 0.07973258  | 0.359492094  | 0.719226991 | 0.82519996  |
| ENSG00000205592 | 16.64861009 | -1.712820982 | 0.466784661 | -3.66940289  | 0.000243118 | 0.001272856 |
| ENSG00000205593 | 13.83827117 | -1.236429863 | 0.490900745 | -2.518696245 | 0.011779022 | 0.037065396 |
| ENSG00000205611 | 124.6132008 | -0.944894906 | 0.19427475  | -4.863704141 | 1.15E-06    | 1.01E-05    |
| ENSG00000205629 | 165.307924  | 0.255461204  | 0.144990176 | 1.761920785  | 0.078082682 | 0.173274477 |
| ENSG00000205643 | 42.79733244 | 0.179470139  | 0.302194595 | 0.593889309  | 0.55258615  | 0.69986274  |
| ENSG00000205659 | 72.92478918 | -0.594404729 | 0.216089    | -2.750740341 | 0.005946076 | 0.020700006 |
| ENSG00000205683 | 7.538649287 | -2.894929721 | 0.827162545 | -3.499831731 | 0.000465552 | 0.002271486 |
| ENSG00000205702 | 10.60462736 | -0.547662777 | 0.550984988 | -0.993970414 | 0.320237271 | 0.491948048 |
| ENSG00000205707 | 73.87399669 | 0.32329034   | 0.21341889  | 1.514815953  | 0.129819019 | 0.256407166 |
| ENSG00000205726 | 776.739323  | -0.108501262 | 0.082159094 | -1.320623884 | 0.186626805 | 0.334808012 |
| ENSG00000205730 | 292.6189811 | 0.144988137  | 0.11422638  | 1.26930519   | 0.204332236 | 0.357575049 |
| ENSG00000205740 | 14.68111359 | 0.868976107  | 0.469929704 | 1.849161906  | 0.064434437 | 0.149087555 |
| ENSG00000205746 | 15.5178565  | 0.163648457  | 0.481695655 | 0.339734135  | 0.734056753 | 0.836073559 |
| ENSG00000205758 | 88.25068991 | -0.057142157 | 0.189319008 | -0.301830002 | 0.762781658 | 0.856873889 |
| ENSG00000205765 | 160.1802206 | -0.003713464 | 0.149938081 | -0.024766653 | 0.98024109  | 0.989966683 |
| ENSG00000205795 | 20.99211837 | -2.128533705 | 0.442410352 | -4.811220386 | 1.50E-06    | 1.28E-05    |
| ENSG00000205808 | 40.71275649 | -0.17498766  | 0.272392634 | -0.642409662 | 0.520607228 | 0.674960491 |
| ENSG00000205885 | 59.15707433 | -0.214243911 | 0.229365532 | -0.934071956 | 0.350266777 | 0.522258509 |
| ENSG00000205903 | 231.9183718 | 0.341745955  | 0.12614497  | 2.709152455  | 0.006745534 | 0.023060236 |
| ENSG00000205913 | 26.36686836 | -0.253245317 | 0.355993573 | -0.711376093 | 0.47685121  | 0.63753861  |
| ENSG00000205937 | 1459.230885 | 0.277372687  | 0.087541549 | 3.168469012  | 0.001532441 | 0.006503383 |
| ENSG00000205940 | 10.49987115 | 0.523797839  | 0.535715797 | 0.977753209  | 0.328196398 | 0.500616224 |
| ENSG00000205978 | 92.53500338 | -1.100694685 | 0.210725998 | -5.223345446 | 1.76E-07    | 1.78E-06    |
| ENSG00000205981 | 55.80715405 | 0.05839041   | 0.241672133 | 0.241610023  | 0.809082355 | 0.887211541 |
| ENSG00000206052 | 20.60326621 | -3.99447044  | 0.641565586 | -6.226129532 | 4.78E-10    | 6.95E-09    |
| ENSG00000206053 | 960.3205412 | -0.050308338 | 0.07915438  | -0.63557239  | 0.52505517  | 0.678389438 |
| ENSG00000206077 | 21.46208704 | 1.36282555   | 0.385488414 | 3.53532169   | 0.000407279 | 0.002014555 |
| ENSG00000206172 | 11.51515934 | -1.503438062 | 0.542807412 | -2.769744902 | 0.005610021 | 0.019700992 |

|                 |             |              |             |              |             |             |
|-----------------|-------------|--------------|-------------|--------------|-------------|-------------|
| ENSG00000206190 | 226.6511118 | 1.370574134  | 0.130255356 | 10.52220944  | 6.83E-26    | 3.20E-24    |
| ENSG00000206195 | 40.0570513  | -0.029018783 | 0.282956163 | -0.102555754 | 0.918315561 | 0.955355281 |
| ENSG00000206262 | 76.51779368 | -0.271327682 | 0.208719392 | -1.299963936 | 0.19361333  | 0.344438506 |
| ENSG00000206341 | 46.96892468 | 1.693602528  | 0.280497757 | 6.03784696   | 1.56E-09    | 2.13E-08    |
| ENSG00000206417 | 16.60243595 | 0.096654788  | 0.462020769 | 0.209200095  | 0.834292039 | 0.902804119 |
| ENSG00000206418 | 321.2724803 | -0.105110025 | 0.106510061 | -0.986855364 | 0.323713549 | 0.495500078 |
| ENSG00000206503 | 33.08053841 | 1.589966042  | 0.332721781 | 4.778665336  | 1.76E-06    | 1.48E-05    |
| ENSG00000206527 | 313.6073635 | -0.055247135 | 0.112765918 | -0.489927595 | 0.624185136 | 0.755965861 |
| ENSG00000206530 | 52.74774999 | -0.481321914 | 0.241472202 | -1.99328084  | 0.046230703 | 0.11461764  |
| ENSG00000206538 | 18.25883901 | -4.64950252  | 0.803056381 | -5.789758516 | 7.05E-09    | 8.86E-08    |
| ENSG00000206557 | 289.6715751 | -3.318326474 | 0.156043356 | -21.26541347 | 2.37E-100   | 5.85E-98    |
| ENSG00000206560 | 1034.80757  | 1.343195806  | 0.075866119 | 17.7048178   | 3.85E-70    | 6.21E-68    |
| ENSG00000206561 | 13.62622621 | -0.217398111 | 0.465043695 | -0.467478893 | 0.64015729  | 0.767653189 |
| ENSG00000206562 | 201.9398632 | 0.160242071  | 0.131433474 | 1.219187675  | 0.222772969 | 0.380970525 |
| ENSG00000206573 | 222.8832165 | -1.047782051 | 0.128877742 | -8.130046608 | 4.29E-16    | 1.12E-14    |
| ENSG00000206603 | 29.64458383 | -0.256777313 | 0.348811325 | -0.736149587 | 0.461639668 | 0.624677335 |
| ENSG00000206634 | 542.8355209 | -0.606644817 | 0.244405612 | -2.482123108 | 0.013060215 | 0.040516085 |
| ENSG00000206754 | 11.47301175 | 0.250495438  | 0.946601763 | 0.264626     | 0.791297589 | 0.875431774 |
| ENSG00000206828 | 17.75482059 | 0.88408434   | 0.415894582 | 2.125741418  | 0.033524796 | 0.08820431  |
| ENSG00000207119 | 11.23393426 | 0.523048567  | 0.528862819 | 0.989006126  | 0.322660144 | 0.494426426 |
| ENSG00000207175 | 37.1961561  | 0.123412662  | 0.283421213 | 0.435439046  | 0.663243774 | 0.784755231 |
| ENSG00000207181 | 30.80817842 | 0.680109546  | 0.339420483 | 2.003737485  | 0.045098189 | 0.112421341 |
| ENSG00000207205 | 116.4602067 | 0.646994135  | 0.16772032  | 3.857577523  | 0.000114516 | 0.000651787 |
| ENSG00000207217 | 9.020348852 | -1.833475417 | 0.675521394 | -2.714163361 | 0.006644339 | 0.022748003 |
| ENSG00000207313 | 9.715537018 | -4.07715458  | 0.950476357 | -4.28959074  | 1.79E-05    | 0.000121412 |
| ENSG00000207344 | 105.5484726 | -0.947567272 | 0.193279652 | -4.902571287 | 9.46E-07    | 8.43E-06    |
| ENSG00000207445 | 221.2595962 | -0.273578849 | 0.252501486 | -1.083474211 | 0.278597992 | 0.447406653 |
| ENSG00000207475 | 13.82818163 | -2.612340062 | 0.580561398 | -4.499679228 | 6.81E-06    | 5.06E-05    |
| ENSG00000207697 | 13.10165097 | -0.620701494 | 0.482368546 | -1.28677854  | 0.198171489 | 0.349844778 |
| ENSG00000208028 | 13.29450058 | 0.22751078   | 0.479175217 | 0.474796634  | 0.634931932 | 0.764126872 |
| ENSG00000209082 | 679.8834715 | -1.001516795 | 0.10357746  | -9.669254215 | 4.07E-22    | 1.53E-20    |
| ENSG00000209482 | 20.56771706 | 0.823888371  | 0.394776022 | 2.086976732  | 0.036890238 | 0.095449838 |
| ENSG00000210049 | 38.15693383 | 0.276822292  | 0.313268477 | 0.883658308  | 0.376880693 | 0.546505362 |
| ENSG00000210082 | 16976.15724 | -0.304584953 | 0.122744153 | -2.481462003 | 0.013084466 | 0.040573398 |
| ENSG00000210100 | 31.38749683 | -0.297331469 | 0.339120339 | -0.876772739 | 0.380610089 | 0.55021405  |
| ENSG00000210107 | 49.83558942 | -0.012538954 | 0.24998385  | -0.050159056 | 0.959995639 | 0.978814678 |
| ENSG00000210112 | 188.710184  | -0.425837361 | 0.141292605 | -3.0138687   | 0.002579394 | 0.010160642 |
| ENSG00000210117 | 11.0863863  | 0.48075865   | 0.52064489  | 0.923390701  | 0.355803636 | 0.527227053 |
| ENSG00000210127 | 29.48366378 | 0.048136257  | 0.32271803  | 0.149158872  | 0.881428272 | 0.934729197 |
| ENSG00000210151 | 28.81429823 | 0.29643913   | 0.346851993 | 0.854655979  | 0.392741627 | 0.560996709 |
| ENSG00000210154 | 258.4606118 | -0.14739127  | 0.127789243 | -1.153393409 | 0.248748946 | 0.412925601 |
| ENSG00000210164 | 10.05780526 | -1.417834684 | 0.585116136 | -2.423167977 | 0.015385811 | 0.046528413 |
| ENSG00000210176 | 15.23105363 | 0.009958824  | 0.43818489  | 0.022727447  | 0.981867682 | 0.990825814 |
| ENSG00000210194 | 27.61880103 | -0.240259847 | 0.347236717 | -0.691919475 | 0.488987899 | 0.648858211 |
| ENSG00000210195 | 93.79907263 | -0.303166333 | 0.214798933 | -1.411395899 | 0.158127911 | 0.296339531 |
| ENSG00000210196 | 147.3007101 | -0.259852918 | 0.152774501 | -1.700891951 | 0.088963278 | 0.191549229 |
| ENSG00000211445 | 8.6027232   | -2.638750721 | 0.751481232 | -3.511399366 | 0.000445754 | 0.002188574 |
| ENSG00000211448 | 33.96540092 | -1.664226072 | 0.326379249 | -5.099056011 | 3.41E-07    | 3.31E-06    |
| ENSG00000211450 | 150.6373595 | 0.424220781  | 0.181501774 | 2.337281734  | 0.01942454  | 0.056398617 |
| ENSG00000211454 | 9.167466223 | -0.210810138 | 0.582124349 | -0.362139358 | 0.717247893 | 0.823876127 |

|                 |             |              |             |              |             |             |
|-----------------|-------------|--------------|-------------|--------------|-------------|-------------|
| ENSG00000211455 | 102.63623   | -0.24294002  | 0.179310827 | -1.354854157 | 0.175464028 | 0.320013399 |
| ENSG00000211456 | 464.0962249 | -0.026713199 | 0.098771156 | -0.270455462 | 0.786809877 | 0.87232189  |
| ENSG00000211459 | 8267.412323 | -0.121013379 | 0.078801331 | -1.535676835 | 0.124617659 | 0.248869878 |
| ENSG00000211460 | 206.440699  | -0.08312112  | 0.128909957 | -0.644799842 | 0.519056904 | 0.673862508 |
| ENSG00000211584 | 77.64242667 | 0.037470377  | 0.202330038 | 0.185194338  | 0.85307661  | 0.915794202 |
| ENSG00000212122 | 10.19762821 | -0.848521073 | 0.547912069 | -1.54864461  | 0.121467176 | 0.244238394 |
| ENSG00000212123 | 16.51062733 | 1.080175728  | 0.453446559 | 2.382145608  | 0.01721209  | 0.051126714 |
| ENSG00000212127 | 30.68409812 | -0.592961434 | 0.316438074 | -1.873862479 | 0.060949382 | 0.142648127 |
| ENSG00000212182 | 17.53124798 | -0.055699271 | 0.462790738 | -0.120355199 | 0.90420178  | 0.948496931 |
| ENSG00000212195 | 53.74466311 | 0.812634743  | 0.242973251 | 3.344544058  | 0.000824179 | 0.003779709 |
| ENSG00000212232 | 101.4128878 | 0.32835728   | 0.18459244  | 1.778823011  | 0.075268783 | 0.16793997  |
| ENSG00000212283 | 6.778476325 | -0.961404887 | 0.767827407 | -1.252110667 | 0.210529541 | 0.365654348 |
| ENSG00000212402 | 7.097135036 | -0.659027587 | 0.68048884  | -0.968462007 | 0.332813685 | 0.505081442 |
| ENSG00000212464 | 45.52333101 | -0.332422549 | 0.262884149 | -1.264521085 | 0.206043058 | 0.359535554 |
| ENSG00000212607 | 32.59557833 | -0.294171488 | 0.31001948  | -0.948880657 | 0.342681313 | 0.514590639 |
| ENSG00000212694 | 19.57604992 | -0.088961373 | 0.397632949 | -0.223727368 | 0.822969449 | 0.896348169 |
| ENSG00000212719 | 210.453435  | 0.453018763  | 0.128141231 | 3.535308331  | 0.0004073   | 0.002014555 |
| ENSG00000212747 | 80.81232531 | -0.531616933 | 0.207725186 | -2.559231952 | 0.010490372 | 0.033574449 |
| ENSG00000212802 | 31.78542614 | 0.127510018  | 0.319085865 | 0.399610362  | 0.689443523 | 0.804503503 |
| ENSG00000212864 | 146.8514787 | 0.666455371  | 0.169960887 | 3.921227885  | 8.81E-05    | 0.000513922 |
| ENSG00000212907 | 133204.3304 | -0.268527068 | 0.069579268 | -3.859297134 | 0.000113714 | 0.000647743 |
| ENSG00000212993 | 31.21160328 | 7.639159528  | 1.209787303 | 6.314464957  | 2.71E-10    | 4.05E-09    |
| ENSG00000213015 | 507.3431949 | 0.142592266  | 0.097004403 | 1.469956636  | 0.141573499 | 0.273170733 |
| ENSG00000213020 | 49.27804067 | 0.131910647  | 0.255320377 | 0.516647549  | 0.605402217 | 0.742455469 |
| ENSG00000213023 | 7.26230446  | -1.133009003 | 0.679148419 | -1.668278939 | 0.095260367 | 0.202125198 |
| ENSG00000213024 | 1030.446817 | 0.347986289  | 0.072091547 | 4.827005405  | 1.39E-06    | 1.19E-05    |
| ENSG00000213057 | 14.55057604 | 0.340878104  | 0.475480357 | 0.716913115  | 0.473427709 | 0.634685916 |
| ENSG00000213058 | 22.6054823  | 0.649184874  | 0.366979456 | 1.768995138  | 0.076894686 | 0.171043492 |
| ENSG00000213062 | 11.17916694 | -0.316389223 | 0.53069964  | -0.596173803 | 0.551059124 | 0.698621617 |
| ENSG00000213064 | 513.1608537 | 0.099580849  | 0.094938964 | 1.048893358  | 0.294227203 | 0.464487471 |
| ENSG00000213066 | 161.3835788 | -0.316871225 | 0.146167527 | -2.167863354 | 0.030169085 | 0.080890463 |
| ENSG00000213079 | 722.2126602 | -0.327219061 | 0.081184509 | -4.030560311 | 5.56E-05    | 0.00033793  |
| ENSG00000213096 | 74.3609472  | -0.648697532 | 0.210118173 | -3.08729856  | 0.002019846 | 0.008243108 |
| ENSG00000213160 | 182.1206785 | 0.013218805  | 0.134735112 | 0.098109576  | 0.921845283 | 0.956832011 |
| ENSG00000213169 | 23.01875092 | 0.271205167  | 0.417288323 | 0.649922732  | 0.515742134 | 0.671096242 |
| ENSG00000213178 | 14.60482972 | 0.244768684  | 0.466053896 | 0.525193945  | 0.599448374 | 0.737988721 |
| ENSG00000213190 | 375.0998226 | -0.125557086 | 0.277020212 | -0.453241605 | 0.650374776 | 0.775087119 |
| ENSG00000213197 | 7.396751421 | 0.088628213  | 0.638587784 | 0.13878783   | 0.889617811 | 0.939610225 |
| ENSG00000213199 | 78.5186324  | 0.570637794  | 0.208221194 | 2.740536563  | 0.006133896 | 0.021243302 |
| ENSG00000213204 | 9.285792225 | -0.072136284 | 0.569801764 | -0.126598914 | 0.899257857 | 0.945499634 |
| ENSG00000213235 | 9.314410172 | 0.006657263  | 0.584609104 | 0.011387546  | 0.990914249 | 0.995236126 |
| ENSG00000213246 | 58.07585132 | -0.111662225 | 0.254420005 | -0.43888933  | 0.660741729 | 0.783076162 |
| ENSG00000213281 | 202.8115429 | -0.047677405 | 0.13926315  | -0.342354777 | 0.732083917 | 0.834847437 |
| ENSG00000213300 | 13.28617354 | 0.175895653  | 0.47658025  | 0.369078771  | 0.712069012 | 0.820132623 |
| ENSG00000213337 | 51.80426239 | 0.130024566  | 0.246426997 | 0.527639291  | 0.597749717 | 0.736869725 |
| ENSG00000213339 | 122.870852  | 0.292633059  | 0.171916918 | 1.702177203  | 0.088722155 | 0.191147256 |
| ENSG00000213341 | 126.6723431 | 0.269603455  | 0.176608658 | 1.52655854   | 0.126870823 | 0.252037117 |
| ENSG00000213347 | 37.84564736 | -0.416672743 | 0.295908425 | -1.40811382  | 0.159097369 | 0.297661261 |
| ENSG00000213366 | 218.3662641 | -0.22405197  | 0.132852216 | -1.686475216 | 0.091704305 | 0.196187994 |
| ENSG00000213380 | 165.8362289 | -0.225236311 | 0.141703556 | -1.589489475 | 0.111949928 | 0.228969226 |

|                 |             |              |             |              |             |             |
|-----------------|-------------|--------------|-------------|--------------|-------------|-------------|
| ENSG00000213390 | 180.9609265 | -0.274963227 | 0.140061685 | -1.963158062 | 0.049627811 | 0.121154303 |
| ENSG00000213397 | 10.03464411 | -0.043118323 | 0.562907617 | -0.076599289 | 0.938942325 | 0.966262309 |
| ENSG00000213398 | 30.39049966 | 0.200964387  | 0.317314547 | 0.63332863   | 0.526519061 | 0.679655693 |
| ENSG00000213420 | 26.50891042 | -0.473881508 | 0.344874127 | -1.374070915 | 0.169419668 | 0.311987162 |
| ENSG00000213442 | 40.78851726 | 0.013646     | 0.277936126 | 0.049097613  | 0.960841506 | 0.979316546 |
| ENSG00000213445 | 298.1876754 | -0.493589268 | 0.126759542 | -3.893902267 | 9.86E-05    | 0.000567428 |
| ENSG00000213453 | 16.05170863 | 0.04991927   | 0.442415047 | 0.112833571  | 0.910162502 | 0.951381168 |
| ENSG00000213462 | 22.1098528  | -1.057439005 | 0.381060288 | -2.774991356 | 0.005520318 | 0.019444308 |
| ENSG00000213463 | 216.0630664 | -0.047382919 | 0.12452281  | -0.380515977 | 0.703562439 | 0.814282078 |
| ENSG00000213465 | 358.9612708 | 0.196737937  | 0.110004722 | 1.788449919  | 0.073703449 | 0.165226994 |
| ENSG00000213468 | 62.90394309 | -0.823948767 | 0.231612727 | -3.557441676 | 0.000374484 | 0.00187469  |
| ENSG00000213516 | 252.2175102 | -0.047736418 | 0.123468947 | -0.386626919 | 0.699032426 | 0.8110439   |
| ENSG00000213523 | 140.9796012 | 0.055842653  | 0.157079029 | 0.355506738  | 0.722209998 | 0.827735087 |
| ENSG00000213533 | 14.02926762 | 0.456414587  | 0.462101063 | 0.987694302  | 0.323302386 | 0.495086516 |
| ENSG00000213551 | 297.847677  | -0.012430835 | 0.11957494  | -0.103958532 | 0.917202257 | 0.955230368 |
| ENSG00000213553 | 70.73346103 | 0.104677727  | 0.209986495 | 0.498497426  | 0.618133483 | 0.75188641  |
| ENSG00000213563 | 172.9276485 | 1.140302232  | 0.151273492 | 7.53801752   | 4.77E-14    | 1.08E-12    |
| ENSG00000213585 | 1900.781783 | 0.083757222  | 0.064676757 | 1.295012694  | 0.195315851 | 0.346501863 |
| ENSG00000213588 | 161.1366034 | -0.012258961 | 0.145045538 | -0.084518012 | 0.932644582 | 0.963270344 |
| ENSG00000213593 | 244.2030855 | -0.357116196 | 0.120304511 | -2.968435623 | 0.002993198 | 0.011512993 |
| ENSG00000213598 | 19.93164334 | 0.260044618  | 0.381944508 | 0.680843978  | 0.495970219 | 0.654672813 |
| ENSG00000213613 | 20.45590553 | -0.974103541 | 0.412743119 | -2.360072155 | 0.018271381 | 0.053660482 |
| ENSG00000213614 | 276.3025962 | 0.339965861  | 0.116914111 | 2.907825735  | 0.003639511 | 0.01364768  |
| ENSG00000213619 | 305.195274  | 0.387732641  | 0.109373123 | 3.545045002  | 0.000392546 | 0.001952402 |
| ENSG00000213625 | 23.52891889 | 1.787633037  | 0.387605002 | 4.611996825  | 3.99E-06    | 3.11E-05    |
| ENSG00000213638 | 18.57802107 | -0.175389991 | 0.399794971 | -0.438699842 | 0.660879042 | 0.783076162 |
| ENSG00000213639 | 841.6568389 | -0.120781847 | 0.076097135 | -1.587206241 | 0.112465942 | 0.229860614 |
| ENSG00000213659 | 34.3696922  | -0.812158844 | 0.306381063 | -2.650812804 | 0.008029833 | 0.026843186 |
| ENSG00000213672 | 532.3236632 | 0.590229103  | 0.090368759 | 6.531340123  | 6.52E-11    | 1.06E-09    |
| ENSG00000213676 | 309.3953455 | 0.294146528  | 0.108374946 | 2.714156176  | 0.006644483 | 0.022748003 |
| ENSG00000213693 | 10.3706586  | 0.252376706  | 0.537846455 | 0.469235604  | 0.638901239 | 0.76673607  |
| ENSG00000213694 | 13.39358525 | -2.248150911 | 0.557814856 | -4.030281533 | 5.57E-05    | 0.000338185 |
| ENSG00000213699 | 390.3144732 | 0.11393918   | 0.104449429 | 1.090854975  | 0.275336702 | 0.443721173 |
| ENSG00000213719 | 1090.545702 | -0.365252094 | 0.070400843 | -5.188177864 | 2.12E-07    | 2.13E-06    |
| ENSG00000213722 | 96.58297014 | -1.044217042 | 0.186785601 | -5.590457904 | 2.26E-08    | 2.65E-07    |
| ENSG00000213740 | 9.029344714 | 0.306251733  | 0.582438124 | 0.525809903  | 0.599020293 | 0.737672211 |
| ENSG00000213741 | 6685.839436 | 0.368875914  | 0.056107159 | 6.574489249  | 4.88E-11    | 8.08E-10    |
| ENSG00000213742 | 61.57107762 | -0.555134311 | 0.224845016 | -2.468964266 | 0.013550475 | 0.0417237   |
| ENSG00000213753 | 97.82473378 | 0.1537853    | 0.177842328 | 0.864728334  | 0.387187914 | 0.555890088 |
| ENSG00000213760 | 7.412047749 | -0.577428457 | 0.642389783 | -0.898875531 | 0.368718963 | 0.540082927 |
| ENSG00000213762 | 158.3035707 | 0.109485975  | 0.14783126  | 0.740614503  | 0.458927212 | 0.62242959  |
| ENSG00000213781 | 5.593301062 | -5.764512785 | 1.315895363 | -4.38067718  | 1.18E-05    | 8.35E-05    |
| ENSG00000213782 | 13.03047377 | 0.663672285  | 0.485275893 | 1.367618493  | 0.171431525 | 0.314504514 |
| ENSG00000213793 | 31.24172802 | 0.396060485  | 0.314244707 | 1.260356903  | 0.207540641 | 0.361523238 |
| ENSG00000213842 | 16.49372088 | 0.217482551  | 0.466128971 | 0.466571624  | 0.640806393 | 0.768195995 |
| ENSG00000213853 | 508.1908608 | 0.395317907  | 0.089686817 | 4.407759349  | 1.04E-05    | 7.45E-05    |
| ENSG00000213859 | 27.70508379 | -1.26516511  | 0.35141285  | -3.600224377 | 0.000317943 | 0.001617581 |
| ENSG00000213866 | 22.73335809 | -0.85846404  | 0.3683604   | -2.330500344 | 0.019779722 | 0.057240575 |
| ENSG00000213888 | 25.74308137 | -0.431122661 | 0.348333809 | -1.237671021 | 0.215838069 | 0.372146477 |
| ENSG00000213889 | 73.06232188 | -0.965596325 | 0.211750067 | -4.560075662 | 5.11E-06    | 3.91E-05    |

|                 |             |              |             |              |             |             |
|-----------------|-------------|--------------|-------------|--------------|-------------|-------------|
| ENSG00000213903 | 55.69849723 | 0.086666051  | 0.238336568 | 0.363628847  | 0.716135183 | 0.823334922 |
| ENSG00000213904 | 47.07622763 | -0.258126318 | 0.253684034 | -1.017511089 | 0.30891036  | 0.48011328  |
| ENSG00000213906 | 13.98952001 | -0.106141797 | 0.511395974 | -0.207553055 | 0.835577963 | 0.903847501 |
| ENSG00000213918 | 56.88027459 | -1.089817147 | 0.245673503 | -4.436038616 | 9.16E-06    | 6.62E-05    |
| ENSG00000213923 | 285.8668557 | 0.200455528  | 0.110905707 | 1.807441049  | 0.070693539 | 0.160241062 |
| ENSG00000213928 | 28.53649992 | 1.347311139  | 0.359439897 | 3.748362806  | 0.000177993 | 0.000964608 |
| ENSG00000213930 | 26.59378109 | -0.106070411 | 0.372784103 | -0.284535768 | 0.775999827 | 0.865699624 |
| ENSG00000213942 | 21.53659043 | 0.176013237  | 0.37751743  | 0.466238702  | 0.64104465  | 0.768258186 |
| ENSG00000213949 | 17.30116232 | -0.229141618 | 0.413378241 | -0.554314657 | 0.579363521 | 0.722635356 |
| ENSG00000213963 | 98.30416465 | -0.817400349 | 0.192224564 | -4.252319966 | 2.12E-05    | 0.000141316 |
| ENSG00000213965 | 163.3363438 | -0.097137263 | 0.143203312 | -0.678317158 | 0.497570622 | 0.655663652 |
| ENSG00000213977 | 22.19969259 | -0.054069672 | 0.381739369 | -0.141640281 | 0.887364148 | 0.93824263  |
| ENSG00000213983 | 255.7410674 | -1.013425032 | 0.127035773 | -7.977477579 | 1.49E-15    | 3.77E-14    |
| ENSG00000213995 | 148.9184039 | 0.174485856  | 0.149927754 | 1.163799567  | 0.244505248 | 0.407760324 |
| ENSG00000214013 | 128.5573047 | -0.010881845 | 0.160096099 | -0.067970706 | 0.945808954 | 0.969848951 |
| ENSG00000214021 | 662.4236025 | 0.16544238   | 0.101496438 | 1.630031394  | 0.103094862 | 0.214735102 |
| ENSG00000214022 | 872.3262332 | 0.305871239  | 0.080916932 | 3.780064701  | 0.000156788 | 0.000862332 |
| ENSG00000214026 | 62.55060684 | 0.693669334  | 0.242073767 | 2.865528727  | 0.004163135 | 0.015332868 |
| ENSG00000214029 | 103.6451432 | -0.001617505 | 0.179445928 | -0.009013886 | 0.992808057 | 0.996284349 |
| ENSG00000214046 | 115.4546145 | -0.004752393 | 0.169182141 | -0.028090392 | 0.977590057 | 0.988629033 |
| ENSG00000214050 | 35.12010019 | -0.300378492 | 0.301028956 | -0.997839195 | 0.318357341 | 0.48997802  |
| ENSG00000214063 | 162.8830382 | -0.711328928 | 0.151917022 | -4.68235172  | 2.84E-06    | 2.29E-05    |
| ENSG00000214078 | 147.7424992 | -0.123612995 | 0.155712901 | -0.793851979 | 0.427281608 | 0.59449532  |
| ENSG00000214087 | 192.1067852 | -0.068638066 | 0.140822087 | -0.487409803 | 0.625967948 | 0.757361909 |
| ENSG00000214106 | 59.37817208 | 0.93479496   | 0.237508109 | 3.935844399  | 8.29E-05    | 0.000487694 |
| ENSG00000214113 | 162.218749  | 0.164870215  | 0.144816716 | 1.13847503   | 0.25492218  | 0.420193835 |
| ENSG00000214114 | 62.00596804 | -0.362556823 | 0.23331217  | -1.553955899 | 0.120194936 | 0.242208986 |
| ENSG00000214160 | 563.5912811 | 0.416503862  | 0.086015952 | 4.842169981  | 1.28E-06    | 1.11E-05    |
| ENSG00000214182 | 121.8686595 | 2.613113642  | 0.196485928 | 13.29924067  | 2.34E-40    | 1.86E-38    |
| ENSG00000214188 | 28.47324965 | 0.675970071  | 0.348962055 | 1.937087601  | 0.052734636 | 0.12712604  |
| ENSG00000214193 | 169.8167481 | -0.062501436 | 0.147503455 | -0.423728627 | 0.671763735 | 0.790770568 |
| ENSG00000214194 | 57.64610623 | 0.503478892  | 0.244893726 | 2.05590768   | 0.039791416 | 0.101442834 |
| ENSG00000214199 | 20.05359687 | -0.120079453 | 0.3892974   | -0.308451722 | 0.75773863  | 0.853838805 |
| ENSG00000214212 | 7.531786196 | -0.802254367 | 0.631737462 | -1.269917356 | 0.20411407  | 0.357326813 |
| ENSG00000214226 | 45.73582445 | 0.126612212  | 0.261648147 | 0.483902575  | 0.628455013 | 0.759031607 |
| ENSG00000214248 | 10.22367316 | 0.062866521  | 0.554191698 | 0.113438223  | 0.909683138 | 0.951381168 |
| ENSG00000214253 | 223.6430342 | 0.381878733  | 0.127330458 | 2.999115371  | 0.002707648 | 0.01056509  |
| ENSG00000214279 | 23.17775491 | -1.526129533 | 0.429079653 | -3.556751108 | 0.00037547  | 0.001878284 |
| ENSG00000214293 | 29.5672816  | 0.157663959  | 0.3393652   | 0.464584936  | 0.642228722 | 0.768968949 |
| ENSG00000214309 | 23.3687747  | -0.16002384  | 0.358239337 | -0.446695334 | 0.655095051 | 0.778784714 |
| ENSG00000214357 | 60.29492445 | -0.272599574 | 0.237947954 | -1.145626888 | 0.251949567 | 0.416515896 |
| ENSG00000214367 | 15.71951272 | -0.619071966 | 0.470205851 | -1.31659775  | 0.187973493 | 0.336611362 |
| ENSG00000214389 | 17.59867851 | 0.682700029  | 0.433565486 | 1.574618023  | 0.11534464  | 0.234266221 |
| ENSG00000214391 | 12.6996642  | -0.392177525 | 0.482288582 | -0.813159465 | 0.416126636 | 0.583987529 |
| ENSG00000214413 | 146.7042703 | 0.014953343  | 0.149012816 | 0.100349377  | 0.920066958 | 0.956213418 |
| ENSG00000214425 | 21.72770123 | 0.128232403  | 0.387310345 | 0.331084372  | 0.740580756 | 0.841457403 |
| ENSG00000214435 | 10.04025835 | -1.301986879 | 0.579041711 | -2.248520017 | 0.02454305  | 0.068228028 |
| ENSG00000214456 | 21.14445891 | -0.346743976 | 0.39007378  | -0.888918954 | 0.374046638 | 0.544085443 |
| ENSG00000214485 | 13.76412953 | 0.221806675  | 0.477631715 | 0.464388498  | 0.642369429 | 0.769058499 |
| ENSG00000214517 | 307.4107404 | 0.497310717  | 0.10804816  | 4.602676426  | 4.17E-06    | 3.24E-05    |

|                 |             |              |             |              |             |             |
|-----------------|-------------|--------------|-------------|--------------|-------------|-------------|
| ENSG00000214530 | 34.49048941 | 0.15501618   | 0.309041668 | 0.501602847  | 0.615946916 | 0.750390987 |
| ENSG00000214575 | 110.8437001 | 0.286307031  | 0.168997011 | 1.694154411  | 0.090235945 | 0.193709482 |
| ENSG00000214595 | 120.03755   | 0.201830911  | 0.167929464 | 1.20187909   | 0.229410377 | 0.388303117 |
| ENSG00000214654 | 21.84332988 | -0.492618283 | 0.377984716 | -1.303275669 | 0.192480665 | 0.342988189 |
| ENSG00000214655 | 408.5617613 | 0.267830065  | 0.100272326 | 2.671026741  | 0.007561962 | 0.025503694 |
| ENSG00000214706 | 408.1931924 | 0.516441503  | 0.100345623 | 5.146627093  | 2.65E-07    | 2.62E-06    |
| ENSG00000214717 | 350.8076468 | 0.138348292  | 0.111812428 | 1.237324814  | 0.215966519 | 0.372276561 |
| ENSG00000214719 | 15.52990258 | -0.195822847 | 0.456179894 | -0.42926672  | 0.667729133 | 0.787594299 |
| ENSG00000214753 | 390.901245  | -0.135033806 | 0.109172608 | -1.236883576 | 0.216130308 | 0.372421791 |
| ENSG00000214756 | 32.12447399 | 0.467277903  | 0.31312055  | 1.492325892  | 0.135613732 | 0.264799291 |
| ENSG00000214826 | 53.28260261 | 0.005848936  | 0.24107367  | 0.024262029  | 0.980643601 | 0.990159622 |
| ENSG00000214900 | 20.61715728 | 0.370494273  | 0.394519771 | 0.939101917  | 0.34767842  | 0.51950205  |
| ENSG00000214922 | 34.42621443 | 0.20985043   | 0.291270039 | 0.72046693   | 0.471237554 | 0.633139543 |
| ENSG00000214941 | 91.25531143 | -0.319986462 | 0.18734971  | -1.707963483 | 0.087643118 | 0.189287036 |
| ENSG00000214944 | 28.64582614 | 0.875711051  | 0.338753042 | 2.585101655  | 0.009735029 | 0.031552366 |
| ENSG00000214954 | 16.24352945 | 0.343935195  | 0.430415837 | 0.799076534  | 0.424246035 | 0.591443436 |
| ENSG00000214960 | 52.53377745 | -0.711211147 | 0.245186554 | -2.900693926 | 0.003723374 | 0.013888006 |
| ENSG00000214973 | 13.17730554 | 0.30693911   | 0.472385158 | 0.649764507  | 0.515844349 | 0.671096242 |
| ENSG00000215006 | 18.44156195 | -0.095609226 | 0.402340303 | -0.237632733 | 0.81216596  | 0.889524775 |
| ENSG00000215012 | 196.556183  | 0.250369623  | 0.13977472  | 1.791236804  | 0.073255303 | 0.164435711 |
| ENSG00000215014 | 14.56932684 | 0.035008836  | 0.472263851 | 0.074129824  | 0.940907084 | 0.967262249 |
| ENSG00000215021 | 2069.501386 | 0.123965127  | 0.061603633 | 2.012302207  | 0.04418809  | 0.110682971 |
| ENSG00000215030 | 242.9953275 | 0.292970645  | 0.147563508 | 1.98538683   | 0.04710145  | 0.116341935 |
| ENSG00000215039 | 13.06620869 | 0.836191965  | 0.486570442 | 1.718542461  | 0.085697716 | 0.186201984 |
| ENSG00000215041 | 188.9075712 | 0.309254641  | 0.135102207 | 2.28904212   | 0.022076905 | 0.062538262 |
| ENSG00000215067 | 16.04552006 | -0.35788923  | 0.436158156 | -0.820549209 | 0.411903089 | 0.58028309  |
| ENSG00000215068 | 57.80495594 | -0.533523068 | 0.23915371  | -2.230879328 | 0.025689123 | 0.070922782 |
| ENSG00000215105 | 9.129130493 | -0.913624942 | 0.610501448 | -1.496515602 | 0.134519345 | 0.263178099 |
| ENSG00000215114 | 228.4009355 | -0.368578051 | 0.133184824 | -2.767417787 | 0.005650229 | 0.019817422 |
| ENSG00000215193 | 279.4915143 | 0.514316093  | 0.115134276 | 4.467097988  | 7.93E-06    | 5.83E-05    |
| ENSG00000215251 | 208.8737081 | 0.084467752  | 0.128991551 | 0.654831662  | 0.512576143 | 0.668538262 |
| ENSG00000215252 | 108.6059959 | -0.248196043 | 0.182964098 | -1.356528661 | 0.174931022 | 0.319373027 |
| ENSG00000215256 | 50.95673247 | -0.395784177 | 0.245255078 | -1.613765471 | 0.106578307 | 0.220486815 |
| ENSG00000215301 | 2622.39623  | -0.023811371 | 0.058241226 | -0.408840486 | 0.682656727 | 0.799239793 |
| ENSG00000215305 | 196.1943422 | 0.049046627  | 0.129447588 | 0.37889178   | 0.704768228 | 0.814939027 |
| ENSG00000215374 | 12.88632853 | -0.65216807  | 0.485562066 | -1.343119895 | 0.179233155 | 0.325114685 |
| ENSG00000215375 | 53.52806747 | -0.247600774 | 0.250749178 | -0.987444011 | 0.323425018 | 0.495216383 |
| ENSG00000215386 | 197.1259545 | -3.541291859 | 0.20524391  | -17.25406546 | 1.04E-66    | 1.63E-64    |
| ENSG00000215388 | 14.92862226 | -0.048479827 | 0.44571471  | -0.108768739 | 0.913385919 | 0.953417734 |
| ENSG00000215417 | 72.68477541 | -0.120230992 | 0.212939552 | -0.564624986 | 0.572328867 | 0.717377715 |
| ENSG00000215421 | 432.0378131 | 0.050937149  | 0.109085646 | 0.466946393  | 0.640538232 | 0.768044434 |
| ENSG00000215424 | 70.57131488 | -0.151406038 | 0.21556423  | -0.702370878 | 0.482447902 | 0.643034982 |
| ENSG00000215712 | 82.32274338 | -0.214174373 | 0.19732419  | -1.085393395 | 0.277747456 | 0.446500174 |
| ENSG00000215717 | 114.4695777 | 0.147520096  | 0.167263376 | 0.881962924  | 0.377796857 | 0.547235502 |
| ENSG00000215788 | 20.54817871 | -0.67832586  | 0.385400387 | -1.760054954 | 0.078398489 | 0.17381054  |
| ENSG00000215808 | 178.5387642 | -2.469142281 | 0.169464949 | -14.57022411 | 4.34E-48    | 4.42E-46    |
| ENSG00000215883 | 56.54623937 | 0.20386671   | 0.233844024 | 0.871806371  | 0.383314018 | 0.552575821 |
| ENSG00000215908 | 10.15418832 | 0.586066175  | 0.564324759 | 1.038526427  | 0.299025038 | 0.469468087 |
| ENSG00000215912 | 12.43041245 | -0.920774686 | 0.500855027 | -1.838405601 | 0.06600266  | 0.151940244 |
| ENSG00000215915 | 32.59180141 | -0.145553026 | 0.309407127 | -0.470425578 | 0.638050994 | 0.766295498 |



|                 |             |              |             |              |             |             |
|-----------------|-------------|--------------|-------------|--------------|-------------|-------------|
| ENSG00000216809 | 11.54634431 | -0.861662637 | 0.532231239 | -1.618962913 | 0.105455243 | 0.218501439 |
| ENSG00000216895 | 12.67735878 | -0.10639837  | 0.48387958  | -0.219886052 | 0.8259599   | 0.898324082 |
| ENSG00000216937 | 34.73088018 | -0.016246598 | 0.294676135 | -0.055133743 | 0.956031914 | 0.97639816  |
| ENSG00000217128 | 404.9967961 | -0.051467132 | 0.100476111 | -0.512232525 | 0.608488282 | 0.74493942  |
| ENSG00000217130 | 9.433230337 | 0.642022282  | 0.586339474 | 1.094966842  | 0.273531163 | 0.441744338 |
| ENSG00000217512 | 42.86703533 | -1.152155419 | 0.280113101 | -4.113179338 | 3.90E-05    | 0.000245931 |
| ENSG00000217527 | 9.15159332  | 0.700839374  | 0.580331952 | 1.207652571  | 0.227180929 | 0.385691383 |
| ENSG00000217555 | 43.41205382 | -0.757480964 | 0.279618537 | -2.708979787 | 0.006749045 | 0.023066627 |
| ENSG00000217930 | 36.23727563 | 0.456076764  | 0.297359551 | 1.533755222  | 0.125089883 | 0.24952252  |
| ENSG00000218208 | 9.296064657 | 0.392930559  | 0.572703173 | 0.6860981    | 0.492651249 | 0.652056166 |
| ENSG00000218283 | 40.08647882 | -0.25614697  | 0.284763478 | -0.899507801 | 0.368382242 | 0.539702269 |
| ENSG00000218336 | 266.5688334 | -0.435934558 | 0.121512451 | -3.587571105 | 0.000333773 | 0.001688943 |
| ENSG00000218426 | 150.8332263 | 0.157695831  | 0.14583607  | 1.081322551  | 0.27955366  | 0.448275144 |
| ENSG00000218510 | 16.37444279 | -0.181318823 | 0.432189631 | -0.419535339 | 0.674824934 | 0.793044913 |
| ENSG00000218596 | 11.45348162 | -1.00655987  | 0.558987156 | -1.800685149 | 0.07175252  | 0.162016982 |
| ENSG00000218739 | 400.3538106 | 0.076884804  | 0.100284504 | 0.766666842  | 0.443279623 | 0.608199732 |
| ENSG00000218891 | 202.5735319 | 0.05555491   | 0.132005566 | 0.420852786  | 0.673862584 | 0.792311686 |
| ENSG00000219200 | 25.56321382 | 0.614214536  | 0.342522144 | 1.793211172  | 0.072939164 | 0.163962765 |
| ENSG00000219470 | 8.577823417 | 0.45402974   | 0.583645419 | 0.777920507  | 0.436615878 | 0.602647464 |
| ENSG00000219481 | 157.483539  | -0.090054828 | 0.146895088 | -0.613055406 | 0.539839705 | 0.689877032 |
| ENSG00000219545 | 15.14516568 | -0.407756992 | 0.474567146 | -0.859218755 | 0.390219838 | 0.558530473 |
| ENSG00000219607 | 9.329177499 | 0.100938208  | 0.570831099 | 0.17682675   | 0.859644477 | 0.920032454 |
| ENSG00000219626 | 55.99332512 | 0.127510162  | 0.241289147 | 0.528453782  | 0.597184418 | 0.736571392 |
| ENSG00000219642 | 10.9193438  | -0.102356105 | 0.517754669 | -0.197692288 | 0.843285824 | 0.909104833 |
| ENSG00000219665 | 21.93727921 | -0.358265214 | 0.381055866 | -0.940190784 | 0.347119708 | 0.518998461 |
| ENSG00000219747 | 8.242371452 | -0.081064833 | 0.603344514 | -0.134359112 | 0.893118612 | 0.941935367 |
| ENSG00000219928 | 8.988727305 | 0.195619743  | 0.576524386 | 0.339308705  | 0.734377186 | 0.836302905 |
| ENSG00000220008 | 26.44275872 | -0.230439961 | 0.339525012 | -0.678712768 | 0.497319875 | 0.655493567 |
| ENSG00000220161 | 9.776672233 | -0.694311068 | 0.559509507 | -1.240928099 | 0.214632312 | 0.370701814 |
| ENSG00000220205 | 222.786422  | 0.151277182  | 0.12234438  | 1.236486568  | 0.216277755 | 0.372584453 |
| ENSG00000220305 | 8.419304524 | -1.110532717 | 0.612883734 | -1.811979428 | 0.069989375 | 0.159007076 |
| ENSG00000220494 | 22.63211882 | -1.136675456 | 0.402348927 | -2.825098761 | 0.004726604 | 0.017063637 |
| ENSG00000220515 | 9.72890836  | 1.224270746  | 0.571273831 | 2.143054137  | 0.032108752 | 0.08500496  |
| ENSG00000220848 | 25.60602067 | -0.199347002 | 0.356973083 | -0.558437069 | 0.576545966 | 0.720601927 |
| ENSG00000221164 | 32.05663406 | -0.617945803 | 0.323728291 | -1.908840901 | 0.056282619 | 0.133773595 |
| ENSG00000221184 | 11.18420488 | -0.142167209 | 0.548899704 | -0.259003983 | 0.795632167 | 0.878221362 |
| ENSG00000221303 | 29.26670273 | -1.080710361 | 0.38178279  | -2.830694281 | 0.004644709 | 0.016830556 |
| ENSG00000221400 | 13.90216639 | 0.462398834  | 0.465481065 | 0.993378396  | 0.320525586 | 0.492175656 |
| ENSG00000221817 | 25.52883527 | -0.662840848 | 0.352536966 | -1.880202396 | 0.060080499 | 0.14101099  |
| ENSG00000221821 | 12.43054439 | -0.082076185 | 0.489756368 | -0.167585743 | 0.866909188 | 0.925339922 |
| ENSG00000221823 | 353.0235089 | -0.128722791 | 0.110078474 | -1.169372963 | 0.242253398 | 0.404918311 |
| ENSG00000221829 | 215.3312723 | -0.330271896 | 0.129985166 | -2.540842987 | 0.011058557 | 0.035128799 |
| ENSG00000221838 | 94.61492255 | 0.547053155  | 0.181573311 | 3.01285002   | 0.002588068 | 0.010186212 |
| ENSG00000221869 | 278.4721759 | 0.569709556  | 0.121890739 | 4.673936372  | 2.95E-06    | 2.37E-05    |
| ENSG00000221883 | 9.137949553 | 0.816970601  | 0.582112524 | 1.40345821   | 0.160480245 | 0.299530429 |
| ENSG00000221886 | 13.14082849 | -0.762838841 | 0.493310598 | -1.546366213 | 0.122016149 | 0.245166764 |
| ENSG00000221887 | 12.07466414 | 0.949893769  | 0.515599566 | 1.842309094  | 0.06542995  | 0.150918639 |
| ENSG00000221890 | 50.57967021 | -2.844991996 | 0.319854474 | -8.894644994 | 5.86E-19    | 1.88E-17    |
| ENSG00000221909 | 45.39011575 | -0.086071199 | 0.274579832 | -0.313465117 | 0.753927318 | 0.851251269 |
| ENSG00000221914 | 462.9984532 | 0.14093912   | 0.09541818  | 1.47706778   | 0.139657469 | 0.27051413  |

|                 |             |              |             |              |             |             |
|-----------------|-------------|--------------|-------------|--------------|-------------|-------------|
| ENSG00000221916 | 16.05390621 | -0.27614431  | 0.444266905 | -0.621572992 | 0.534222685 | 0.685370327 |
| ENSG00000221926 | 27.15016536 | 0.337947615  | 0.378307265 | 0.893315162  | 0.371688421 | 0.542396348 |
| ENSG00000221944 | 39.98835217 | -0.369567324 | 0.278051515 | -1.329132566 | 0.183804238 | 0.331182418 |
| ENSG00000221947 | 13.9946676  | -0.490228369 | 0.466136547 | -1.051684046 | 0.292944533 | 0.463541004 |
| ENSG00000221963 | 39.44650341 | 1.993558621  | 0.312202035 | 6.385476061  | 1.71E-10    | 2.62E-09    |
| ENSG00000221968 | 90.98640528 | 0.183932937  | 0.185934936 | 0.989232798  | 0.322549255 | 0.494364363 |
| ENSG00000221978 | 932.3523896 | 0.025410429  | 0.091289186 | 0.278350918  | 0.780742993 | 0.868632739 |
| ENSG00000221983 | 2949.683102 | 0.496373073  | 0.063388647 | 7.830630486  | 4.85E-15    | 1.17E-13    |
| ENSG00000221988 | 106.1734109 | -0.064066448 | 0.187611591 | -0.341484489 | 0.73273888  | 0.835385362 |
| ENSG00000222011 | 31.04950164 | -0.467551946 | 0.326614941 | -1.43150814  | 0.152284636 | 0.288410909 |
| ENSG00000222041 | 113.0704259 | -0.418826226 | 0.173703149 | -2.411160811 | 0.015901835 | 0.047882761 |
| ENSG00000222257 | 16.10336009 | -0.127105793 | 0.426883272 | -0.297753042 | 0.765891657 | 0.858785918 |
| ENSG00000222259 | 10.7815902  | -0.027633876 | 0.518069695 | -0.053340075 | 0.957460951 | 0.977076206 |
| ENSG00000222489 | 22.82364849 | -0.47880386  | 0.369807238 | -1.294739016 | 0.195410276 | 0.346545487 |
| ENSG00000222664 | 10.52030141 | -0.566916981 | 0.561219535 | -1.010151902 | 0.312422519 | 0.484018873 |
| ENSG00000222724 | 112.020797  | 1.182958332  | 0.17802361  | 6.644951945  | 3.03E-11    | 5.10E-10    |
| ENSG00000222898 | 14.32435399 | 1.139517373  | 0.467037049 | 2.439886462  | 0.014691879 | 0.044699333 |
| ENSG00000223118 | 10.61142808 | 0.356409547  | 0.532852682 | 0.668870702  | 0.503577961 | 0.661346262 |
| ENSG00000223145 | 9.604867477 | -0.92044263  | 0.565073924 | -1.628888877 | 0.103336545 | 0.215160102 |
| ENSG00000223260 | 10.73271636 | -0.45738272  | 0.55424256  | -0.825239259 | 0.409235769 | 0.577637398 |
| ENSG00000223305 | 11.31287775 | -0.256883693 | 0.52955311  | -0.48509524  | 0.627608788 | 0.758494295 |
| ENSG00000223482 | 260.9873548 | -0.066904409 | 0.116172153 | -0.57590745  | 0.56467774  | 0.710691534 |
| ENSG00000223486 | 28.05000772 | -0.073127212 | 0.329696289 | -0.221801744 | 0.824468222 | 0.89742775  |
| ENSG00000223496 | 479.7463652 | -0.140208906 | 0.093402408 | -1.501127315 | 0.133322635 | 0.261708085 |
| ENSG00000223501 | 269.4515393 | 0.236062348  | 0.118901312 | 1.985363706  | 0.047104021 | 0.116341935 |
| ENSG00000223508 | 12.24424565 | -0.172901671 | 0.500903877 | -0.345179343 | 0.729959548 | 0.833095691 |
| ENSG00000223519 | 15.20673579 | -0.253354534 | 0.44459321  | -0.569856958 | 0.56877472  | 0.714184186 |
| ENSG00000223529 | 12.11258259 | -0.250819588 | 0.497066686 | -0.504599472 | 0.613840181 | 0.748716754 |
| ENSG00000223546 | 61.63187972 | -0.446075354 | 0.250474699 | -1.780919815 | 0.074925551 | 0.16732579  |
| ENSG00000223572 | 20.5296989  | -1.995676942 | 0.436565966 | -4.571306735 | 4.85E-06    | 3.72E-05    |
| ENSG00000223599 | 11.18124784 | -0.838991169 | 0.543114704 | -1.544777122 | 0.122400183 | 0.245762631 |
| ENSG00000223669 | 8.119611535 | -0.16750001  | 0.606122856 | -0.276346632 | 0.782281842 | 0.869773076 |
| ENSG00000223722 | 73.46018755 | 0.73502619   | 0.20698137  | 3.551170771  | 0.000383521 | 0.001915153 |
| ENSG00000223745 | 66.54885028 | -0.515767441 | 0.215786596 | -2.390173677 | 0.016840407 | 0.050158465 |
| ENSG00000223749 | 29.23240011 | 1.060931044  | 0.339137472 | 3.128321498  | 0.001758078 | 0.007323759 |
| ENSG00000223760 | 13.5743291  | 0.450467265  | 0.504796516 | 0.892373957  | 0.372192525 | 0.542850006 |
| ENSG00000223764 | 28.58744477 | -0.326247253 | 0.33203193  | -0.982577951 | 0.325815201 | 0.497957363 |
| ENSG00000223768 | 103.4339329 | -0.470127297 | 0.181088454 | -2.596119661 | 0.009428322 | 0.030714203 |
| ENSG00000223770 | 7.087531141 | -2.866654963 | 0.837801566 | -3.421639538 | 0.000622448 | 0.002943947 |
| ENSG00000223802 | 99.39182664 | 0.498728966  | 0.185432184 | 2.689549111  | 0.007154862 | 0.024294016 |
| ENSG00000223812 | 26.75387731 | -2.048723217 | 0.404875085 | -5.060136548 | 4.19E-07    | 4.01E-06    |
| ENSG00000223921 | 7.950922559 | -1.875937445 | 0.703802199 | -2.665432768 | 0.00768893  | 0.025869798 |
| ENSG00000223959 | 163.756817  | 0.074540879  | 0.144044101 | 0.517486513  | 0.604816582 | 0.741997252 |
| ENSG00000223960 | 81.27416858 | -0.221623007 | 0.213103394 | -1.039978777 | 0.298349761 | 0.468992736 |
| ENSG00000224032 | 343.1052457 | -0.225254894 | 0.116045217 | -1.941095882 | 0.052246648 | 0.126252997 |
| ENSG00000224043 | 13.73648906 | -0.317330614 | 0.466661288 | -0.680002011 | 0.496503187 | 0.655099069 |
| ENSG00000224051 | 109.7198014 | 0.045234527  | 0.170823216 | 0.264803158  | 0.791161104 | 0.875349719 |
| ENSG00000224063 | 58.46813428 | -3.030746845 | 0.321107672 | -9.438413064 | 3.78E-21    | 1.37E-19    |
| ENSG00000224078 | 1421.260977 | -0.477387085 | 0.077372417 | -6.169990636 | 6.83E-10    | 9.73E-09    |
| ENSG00000224083 | 13.736898   | -0.225814031 | 0.46682906  | -0.483718883 | 0.62858539  | 0.759090352 |

|                 |             |              |             |              |             |             |
|-----------------|-------------|--------------|-------------|--------------|-------------|-------------|
| ENSG00000224099 | 45.06243821 | -3.208750864 | 0.36671579  | -8.749966465 | 2.13E-18    | 6.63E-17    |
| ENSG00000224141 | 34.64908611 | 0.402523082  | 0.295350563 | 1.362865465  | 0.172924915 | 0.316650919 |
| ENSG00000224152 | 64.81172299 | 0.142341779  | 0.221037995 | 0.643969734  | 0.51959506  | 0.67424959  |
| ENSG00000224165 | 10.32379345 | -0.174081077 | 0.531308858 | -0.327645727 | 0.743179544 | 0.842922019 |
| ENSG00000224186 | 11.04965575 | -0.635763929 | 0.557453494 | -1.140478867 | 0.254086852 | 0.418964434 |
| ENSG00000224237 | 17.42832891 | -0.25644819  | 0.408926509 | -0.627125375 | 0.530577055 | 0.682760708 |
| ENSG00000224322 | 9.999660234 | -6.603047413 | 1.258323575 | -5.247495592 | 1.54E-07    | 1.58E-06    |
| ENSG00000224356 | 14.873353   | -1.946254806 | 0.513243399 | -3.792069826 | 0.000149397 | 0.000825237 |
| ENSG00000224411 | 16.69329619 | 0.622922266  | 0.418829573 | 1.487292937  | 0.136937459 | 0.266605751 |
| ENSG00000224420 | 16.38893892 | -0.048854105 | 0.422192811 | -0.115715151 | 0.907878298 | 0.950649754 |
| ENSG00000224424 | 9.125396852 | -0.701175934 | 0.578617861 | -1.211811768 | 0.225584443 | 0.383961822 |
| ENSG00000224470 | 344.7140925 | 0.518167782  | 0.10611773  | 4.882952014  | 1.05E-06    | 9.22E-06    |
| ENSG00000224505 | 28.46232425 | -0.210834812 | 0.326803706 | -0.645142048 | 0.518835137 | 0.67376141  |
| ENSG00000224531 | 240.7683908 | 0.114506036  | 0.127134548 | 0.900668134  | 0.367764796 | 0.539135055 |
| ENSG00000224616 | 26.74000821 | -0.90566548  | 0.345926025 | -2.618090037 | 0.008842347 | 0.029095444 |
| ENSG00000224631 | 33.78083377 | -0.269855847 | 0.308709438 | -0.874141874 | 0.382040996 | 0.551488015 |
| ENSG00000224635 | 10.74956693 | -0.659138156 | 0.544387109 | -1.210789428 | 0.225976118 | 0.384346812 |
| ENSG00000224660 | 336.0491269 | 0.101914211  | 0.117839772 | 0.864854115  | 0.387118865 | 0.555847766 |
| ENSG00000224699 | 33.80549408 | -0.354701    | 0.300212438 | -1.181500016 | 0.237404147 | 0.398806034 |
| ENSG00000224728 | 9.324208579 | 0.103973134  | 0.570970823 | 0.182098857  | 0.855505146 | 0.917119467 |
| ENSG00000224729 | 9.858380049 | -0.058221933 | 0.565689533 | -0.102922062 | 0.918024828 | 0.955355281 |
| ENSG00000224790 | 14.87296016 | -0.033992103 | 0.44919351  | -0.075673629 | 0.939678757 | 0.966654522 |
| ENSG00000224817 | 11.47097545 | -0.506956643 | 0.518178999 | -0.978342704 | 0.327904856 | 0.500280168 |
| ENSG00000224819 | 6.933914674 | -3.623784307 | 0.9954231   | -3.640446265 | 0.000272166 | 0.001409183 |
| ENSG00000224852 | 12.26850451 | -0.559890537 | 0.496956362 | -1.126639239 | 0.259895042 | 0.425974404 |
| ENSG00000224861 | 14.21986647 | -0.61681415  | 0.473116374 | -1.303726067 | 0.192326998 | 0.342757846 |
| ENSG00000224870 | 75.64024175 | -0.177809183 | 0.210582535 | -0.844368139 | 0.39846372  | 0.566577577 |
| ENSG00000224877 | 285.2268832 | 0.150771658  | 0.110721413 | 1.361720869  | 0.173285993 | 0.317070254 |
| ENSG00000224903 | 66.57858364 | 0.165199072  | 0.223462744 | 0.739268966  | 0.45974369  | 0.623000156 |
| ENSG00000224905 | 17.45254412 | -0.166773489 | 0.423382707 | -0.393907182 | 0.693649568 | 0.807332462 |
| ENSG00000224914 | 14.72741256 | -0.458232571 | 0.451190019 | -1.015608838 | 0.309815695 | 0.481094524 |
| ENSG00000224934 | 10.52258918 | -0.731104696 | 0.544633129 | -1.34238014  | 0.179472771 | 0.325381261 |
| ENSG00000224986 | 14.23217522 | -0.27630106  | 0.490037919 | -0.563836081 | 0.572865694 | 0.717717124 |
| ENSG00000225022 | 13.73797239 | 0.01460197   | 0.466459823 | 0.031303811  | 0.975027251 | 0.987327552 |
| ENSG00000225031 | 11.67545862 | 0.463390427  | 0.502890599 | 0.921453747  | 0.356813579 | 0.528096127 |
| ENSG00000225077 | 32.33867973 | -0.890210522 | 0.316934993 | -2.808811085 | 0.004972482 | 0.017818482 |
| ENSG00000225092 | 17.06313188 | -0.727315755 | 0.435981643 | -1.668225639 | 0.095270943 | 0.202125198 |
| ENSG00000225110 | 9.709815097 | -0.048601077 | 0.56849775  | -0.08549036  | 0.931871559 | 0.963137355 |
| ENSG00000225131 | 15.80921466 | 0.503105531  | 0.442397629 | 1.137224746  | 0.255444344 | 0.420758291 |
| ENSG00000225138 | 76.8837498  | -0.258902552 | 0.202661954 | -1.277509401 | 0.201422463 | 0.353805345 |
| ENSG00000225190 | 60.89558397 | 0.148835697  | 0.251688371 | 0.591349121  | 0.554286524 | 0.701383911 |
| ENSG00000225200 | 8.116473848 | 0.220668272  | 0.611366283 | 0.360942822  | 0.718142191 | 0.824364089 |
| ENSG00000225206 | 282.3857308 | 1.39618003   | 0.118383751 | 11.79367963  | 4.21E-32    | 2.48E-30    |
| ENSG00000225210 | 8.430883129 | -1.043851548 | 0.609600735 | -1.712352836 | 0.086831665 | 0.188083948 |
| ENSG00000225215 | 10.61959949 | -0.783614188 | 0.555011829 | -1.411887362 | 0.15798313  | 0.296247366 |
| ENSG00000225224 | 11.25049921 | -0.323976168 | 0.510613357 | -0.63448432  | 0.525764797 | 0.678994033 |
| ENSG00000225264 | 25.20830825 | -0.004784248 | 0.366754953 | -0.013044809 | 0.989592044 | 0.994744093 |
| ENSG00000225285 | 7.979119666 | -1.186268578 | 0.632533571 | -1.875423903 | 0.060734429 | 0.142284278 |
| ENSG00000225300 | 9.895242451 | -0.073763173 | 0.569560096 | -0.129509026 | 0.896954883 | 0.944134611 |
| ENSG00000225345 | 10.73194959 | 0.549691349  | 0.537689321 | 1.022321493  | 0.306628764 | 0.477595697 |

|                 |             |              |             |              |             |             |
|-----------------|-------------|--------------|-------------|--------------|-------------|-------------|
| ENSG00000225361 | 9.841614135 | -0.307596951 | 0.571159067 | -0.538548662 | 0.590198319 | 0.731408539 |
| ENSG00000225377 | 44.2989656  | -0.534866829 | 0.265726573 | -2.012846602 | 0.04413077  | 0.11057883  |
| ENSG00000225423 | 9.451705557 | -0.009775628 | 0.556247773 | -0.017574232 | 0.985978513 | 0.992629448 |
| ENSG00000225439 | 63.59883419 | 0.220153234  | 0.218440147 | 1.007842361  | 0.313530146 | 0.484772478 |
| ENSG00000225447 | 7.635274157 | -0.362800618 | 0.656762907 | -0.552407291 | 0.580669336 | 0.723518357 |
| ENSG00000225465 | 117.6260082 | 0.161738863  | 0.172643092 | 0.936839471  | 0.348841139 | 0.520796203 |
| ENSG00000225470 | 648.2893641 | -0.20732555  | 0.104565558 | -1.982732698 | 0.047397295 | 0.116866738 |
| ENSG00000225484 | 222.538238  | -0.291840695 | 0.129149747 | -2.259707824 | 0.02383939  | 0.066614664 |
| ENSG00000225518 | 15.36188297 | 0.247227062  | 0.441789086 | 0.559604276  | 0.575749388 | 0.719981452 |
| ENSG00000225530 | 10.2397609  | 0.485536986  | 0.56701752  | 0.856299795  | 0.391831975 | 0.560096036 |
| ENSG00000225614 | 117.9634646 | -1.08317639  | 0.198412595 | -5.459211846 | 4.78E-08    | 5.31E-07    |
| ENSG00000225616 | 43.16180345 | 1.104530168  | 0.296941093 | 3.719694556  | 0.000199464 | 0.001067785 |
| ENSG00000225630 | 37912.39217 | -0.324368152 | 0.07518306  | -4.31437815  | 1.60E-05    | 0.000109725 |
| ENSG00000225663 | 124.1767477 | 0.812263329  | 0.177399555 | 4.578722472  | 4.68E-06    | 3.59E-05    |
| ENSG00000225697 | 390.6058418 | 0.297442689  | 0.098322368 | 3.025178251  | 0.002484866 | 0.009843309 |
| ENSG00000225733 | 519.8850881 | -0.21431224  | 0.095143972 | -2.252504656 | 0.024290399 | 0.067659574 |
| ENSG00000225756 | 20.31737571 | -0.089887825 | 0.386225813 | -0.232733862 | 0.815968073 | 0.891907519 |
| ENSG00000225761 | 10.42675597 | -1.744954741 | 0.600264122 | -2.90697824  | 0.003649386 | 0.013666468 |
| ENSG00000225783 | 20.00313079 | -0.12224159  | 0.406103191 | -0.301011153 | 0.76340599  | 0.857280464 |
| ENSG00000225791 | 24.35138268 | -0.732566954 | 0.364834824 | -2.007941416 | 0.044649517 | 0.111539379 |
| ENSG00000225813 | 22.40686076 | -0.609082852 | 0.386488202 | -1.575941641 | 0.115039253 | 0.233891502 |
| ENSG00000225828 | 43.30300078 | 0.241463119  | 0.27162083  | 0.888971285  | 0.374018512 | 0.544085443 |
| ENSG00000225830 | 161.5873791 | -0.167455062 | 0.144119435 | -1.16191867  | 0.245268503 | 0.408790538 |
| ENSG00000225855 | 40.53232146 | -0.780666112 | 0.286719584 | -2.722751269 | 0.006474078 | 0.022256822 |
| ENSG00000225857 | 13.1491692  | 0.358396999  | 0.488682826 | 0.733393892  | 0.463318224 | 0.62643451  |
| ENSG00000225880 | 13.23520896 | 0.208591481  | 0.487077831 | 0.428250822  | 0.668468519 | 0.788094582 |
| ENSG00000225891 | 9.430511439 | -1.107324353 | 0.609536666 | -1.816665698 | 0.069268317 | 0.157777209 |
| ENSG00000225921 | 513.5355718 | 0.337063191  | 0.093184119 | 3.617174207  | 0.000297837 | 0.001529135 |
| ENSG00000225950 | 9.735505885 | -1.658063976 | 0.604756358 | -2.741705737 | 0.006112107 | 0.021178285 |
| ENSG00000225968 | 114.046395  | -3.830952211 | 0.269311284 | -14.22499701 | 6.41E-46    | 5.96E-44    |
| ENSG00000225972 | 10338.14265 | -0.610330255 | 0.071134474 | -8.579950389 | 9.49E-18    | 2.77E-16    |
| ENSG00000225973 | 45.48584335 | -0.244530644 | 0.259875516 | -0.940952991 | 0.34672895  | 0.518745507 |
| ENSG00000225975 | 14.93358547 | 0.439569311  | 0.453715822 | 0.968820766  | 0.332634624 | 0.505027946 |
| ENSG00000226043 | 52.03858542 | 5.431797566  | 0.54970635  | 9.881271266  | 5.02E-23    | 1.97E-21    |
| ENSG00000226049 | 8.46452722  | -0.157172011 | 0.598362465 | -0.262670238 | 0.792804758 | 0.876423602 |
| ENSG00000226053 | 19.18051541 | 0.931534988  | 0.406956884 | 2.289026248  | 0.022077827 | 0.062538262 |
| ENSG00000226121 | 23.44103612 | -0.11313723  | 0.365254927 | -0.309748676 | 0.756752083 | 0.853000844 |
| ENSG00000226124 | 21.62279267 | -0.277526268 | 0.388344266 | -0.714639799 | 0.474831646 | 0.63590048  |
| ENSG00000226137 | 503.5038566 | 0.108380137  | 0.09196171  | 1.178535469  | 0.238583201 | 0.400164564 |
| ENSG00000226174 | 11.86131704 | -0.581386785 | 0.558198662 | -1.041540988 | 0.297624541 | 0.468271945 |
| ENSG00000226179 | 8.259088203 | -1.20507734  | 0.623915654 | -1.931474763 | 0.053424367 | 0.128348228 |
| ENSG00000226180 | 18.92370354 | -1.286514054 | 0.418363786 | -3.075108548 | 0.00210426  | 0.008514292 |
| ENSG00000226200 | 25.50456883 | -0.408480373 | 0.351402235 | -1.16242964  | 0.245060989 | 0.408493143 |
| ENSG00000226210 | 103.4805925 | -0.154564697 | 0.173393214 | -0.891411454 | 0.372708475 | 0.543151359 |
| ENSG00000226266 | 13.88553385 | -0.641960363 | 0.465106106 | -1.380244968 | 0.167511233 | 0.309718114 |
| ENSG00000226278 | 7.069585199 | -0.931004809 | 0.692911064 | -1.343613715 | 0.179073332 | 0.324908693 |
| ENSG00000226310 | 21.21329206 | 0.042011071  | 0.389980998 | 0.107725944  | 0.914213089 | 0.953636867 |
| ENSG00000226328 | 16.41499371 | -0.201994517 | 0.441931966 | -0.457071522 | 0.647619638 | 0.773169561 |
| ENSG00000226396 | 10.48897475 | -0.090492231 | 0.539722468 | -0.167664376 | 0.866847323 | 0.925339922 |
| ENSG00000226419 | 129.5742285 | -0.094812717 | 0.168603058 | -0.562342809 | 0.573882477 | 0.718394287 |

|                 |             |              |             |              |             |             |
|-----------------|-------------|--------------|-------------|--------------|-------------|-------------|
| ENSG00000226445 | 17.76544299 | -0.024702215 | 0.41322154  | -0.059779593 | 0.952331179 | 0.973822237 |
| ENSG00000226479 | 224.5635372 | 0.326154691  | 0.126685646 | 2.574519696  | 0.010037937 | 0.032384681 |
| ENSG00000226519 | 12.10616535 | -0.630492836 | 0.513454157 | -1.227943775 | 0.219468075 | 0.376832667 |
| ENSG00000226562 | 93.6834027  | -0.047063363 | 0.185327889 | -0.253946471 | 0.799536913 | 0.880801115 |
| ENSG00000226608 | 56.4450004  | 0.303690077  | 0.232452618 | 1.306460126  | 0.19139613  | 0.341575587 |
| ENSG00000226666 | 13.85031416 | -0.363189437 | 0.467287872 | -0.777228468 | 0.437023989 | 0.603033004 |
| ENSG00000226683 | 39.60070842 | -2.806333991 | 0.361216727 | -7.769114165 | 7.90E-15    | 1.87E-13    |
| ENSG00000226688 | 317.077583  | 0.056392306  | 0.110020786 | 0.51256047   | 0.608258811 | 0.744723395 |
| ENSG00000226696 | 27.16050839 | 0.328957312  | 0.356424588 | 0.922936641  | 0.356040224 | 0.527308874 |
| ENSG00000226701 | 9.002513037 | 0.065108802  | 0.56698536  | 0.114833304  | 0.908577251 | 0.95095631  |
| ENSG00000226711 | 10.34193257 | 0.061662288  | 0.527603222 | 0.116872462  | 0.90696112  | 0.95025605  |
| ENSG00000226742 | 59.2490104  | 0.193284195  | 0.250052564 | 0.772974255  | 0.439537617 | 0.604795228 |
| ENSG00000226752 | 112.9392457 | -0.2525831   | 0.176521423 | -1.430892045 | 0.152461157 | 0.288706104 |
| ENSG00000226763 | 19.90891662 | -0.341297075 | 0.394570962 | -0.864982748 | 0.387048258 | 0.555803197 |
| ENSG00000226800 | 10.05214213 | -0.216760787 | 0.544724427 | -0.397927423 | 0.690683685 | 0.805348529 |
| ENSG00000226819 | 8.279194438 | -0.873443777 | 0.614466832 | -1.42146611  | 0.155181299 | 0.292709201 |
| ENSG00000226824 | 31.54010454 | -0.333873467 | 0.340059159 | -0.981809952 | 0.326193485 | 0.498318638 |
| ENSG00000226833 | 12.57678984 | -0.582602498 | 0.504179635 | -1.155545479 | 0.24786712  | 0.412129074 |
| ENSG00000226889 | 8.415962495 | 0.404598897  | 0.585396509 | 0.691153587  | 0.489469028 | 0.6491557   |
| ENSG00000226900 | 65.92489652 | -0.3647936   | 0.218620739 | -1.668613883 | 0.095193926 | 0.202022825 |
| ENSG00000226950 | 154.1420817 | 0.371952474  | 0.161260671 | 2.306529371  | 0.021081071 | 0.06031768  |
| ENSG00000227001 | 8.886543267 | -0.935381747 | 0.619512602 | -1.509867182 | 0.131077318 | 0.25831132  |
| ENSG00000227057 | 325.9008748 | 0.109812668  | 0.111878043 | 0.981539055  | 0.326326985 | 0.498468373 |
| ENSG00000227081 | 48.41297189 | 0.151159162  | 0.26388045  | 0.572831983  | 0.566758462 | 0.712289175 |
| ENSG00000227097 | 26.67765037 | 0.353819233  | 0.373827017 | 0.946478495  | 0.343904586 | 0.515728378 |
| ENSG00000227124 | 58.57896693 | 0.101328387  | 0.23147704  | 0.43774703   | 0.661569673 | 0.783696171 |
| ENSG00000227128 | 22.10288064 | -5.891919417 | 1.035698471 | -5.688836645 | 1.28E-08    | 1.55E-07    |
| ENSG00000227195 | 70.88237127 | 1.758830293  | 0.880929147 | 1.996562719  | 0.045872706 | 0.113967793 |
| ENSG00000227252 | 14.30442635 | -0.903000295 | 0.483673295 | -1.86696331  | 0.061906712 | 0.14442843  |
| ENSG00000227268 | 13.88162087 | -1.885452097 | 0.527222069 | -3.576201013 | 0.000348624 | 0.001757759 |
| ENSG00000227308 | 11.96931874 | -1.85027563  | 0.56870223  | -3.253505143 | 0.001139907 | 0.005041646 |
| ENSG00000227309 | 21.86029065 | -0.213628219 | 0.377404881 | -0.566045194 | 0.571363059 | 0.716537531 |
| ENSG00000227331 | 22.15341132 | -0.357849959 | 0.372075207 | -0.961767816 | 0.336166248 | 0.508028756 |
| ENSG00000227345 | 192.9562143 | -0.209200817 | 0.152942416 | -1.367840413 | 0.171362035 | 0.314504514 |
| ENSG00000227354 | 19.3842839  | -0.080329402 | 0.396597056 | -0.202546643 | 0.839489398 | 0.906612407 |
| ENSG00000227355 | 11.40320104 | 0.29620518   | 0.515580617 | 0.574507982  | 0.565624101 | 0.711309019 |
| ENSG00000227372 | 201.4130498 | -0.565154575 | 0.131765022 | -4.289109255 | 1.79E-05    | 0.000121563 |
| ENSG00000227398 | 34.98214609 | -0.395272532 | 0.301980841 | -1.308932485 | 0.190557222 | 0.34025134  |
| ENSG00000227500 | 461.9201883 | -0.015209583 | 0.115359879 | -0.131844654 | 0.895107166 | 0.943073102 |
| ENSG00000227583 | 10.27744954 | -0.650125181 | 0.56635917  | -1.147902629 | 0.251008763 | 0.41530272  |
| ENSG00000227615 | 127.3524419 | 0.26999111   | 0.16161977  | 1.670532697  | 0.094814016 | 0.201317943 |
| ENSG00000227627 | 12.10247534 | -0.240022097 | 0.494070536 | -0.485805324 | 0.627105199 | 0.758020838 |
| ENSG00000227671 | 38.151389   | -0.338739314 | 0.283049094 | -1.196751097 | 0.231403584 | 0.390923169 |
| ENSG00000227704 | 12.84282721 | -0.560496241 | 0.492592197 | -1.137850424 | 0.255182945 | 0.42044762  |
| ENSG00000227740 | 11.52316931 | -2.022613229 | 0.580567908 | -3.483852968 | 0.000494251 | 0.002397356 |
| ENSG00000227885 | 15.66649348 | -0.921151818 | 0.444701655 | -2.071392827 | 0.038322101 | 0.098375466 |
| ENSG00000227946 | 53.10435674 | -0.152736046 | 0.239653571 | -0.637320134 | 0.523916339 | 0.677354147 |
| ENSG00000227953 | 247.0271314 | -0.183129423 | 0.135409453 | -1.3524124   | 0.176243425 | 0.321143001 |
| ENSG00000228043 | 8.252645952 | -0.295658322 | 0.594588507 | -0.497248633 | 0.61901373  | 0.75257797  |
| ENSG00000228109 | 36.79344375 | 0.473015757  | 0.289353868 | 1.634731067  | 0.102105437 | 0.213180005 |

|                 |             |              |             |              |             |             |
|-----------------|-------------|--------------|-------------|--------------|-------------|-------------|
| ENSG00000228166 | 11.34706087 | 0.06241864   | 0.512329066 | 0.121833104  | 0.903031196 | 0.947693628 |
| ENSG00000228172 | 15.93433455 | -0.778454697 | 0.445111635 | -1.748897658 | 0.080308712 | 0.17706741  |
| ENSG00000228192 | 13.82676139 | -1.291653606 | 0.513704094 | -2.514392277 | 0.011923772 | 0.037453763 |
| ENSG00000228221 | 10.8261911  | -0.0849599   | 0.52550177  | -0.161673861 | 0.87156269  | 0.928472706 |
| ENSG00000228223 | 45.7323333  | 1.031614686  | 0.269343139 | 3.830113104  | 0.000128084 | 0.000719968 |
| ENSG00000228232 | 27.05817565 | 0.671634218  | 0.330733499 | 2.030741426  | 0.042281232 | 0.107013417 |
| ENSG00000228253 | 114209.2909 | -0.210130881 | 0.059795938 | -3.51413305  | 0.000441192 | 0.002167688 |
| ENSG00000228274 | 48.06883928 | 0.079963024  | 0.257734526 | 0.310253441  | 0.756368234 | 0.852705022 |
| ENSG00000228288 | 57.32349495 | -0.026168417 | 0.228366079 | -0.114589771 | 0.908770288 | 0.951016631 |
| ENSG00000228300 | 228.2023557 | 0.823273044  | 0.141470414 | 5.819400812  | 5.91E-09    | 7.49E-08    |
| ENSG00000228315 | 52.94826364 | -0.387030408 | 0.256023408 | -1.511699302 | 0.130610376 | 0.257607969 |
| ENSG00000228393 | 61.76404031 | -0.062046081 | 0.249506419 | -0.248675292 | 0.803611963 | 0.883419725 |
| ENSG00000228412 | 97.26718695 | 0.243805373  | 0.197876404 | 1.232109376  | 0.217908229 | 0.374933476 |
| ENSG00000228423 | 9.378828422 | -0.445242855 | 0.658399473 | -0.67625032  | 0.498881729 | 0.656959937 |
| ENSG00000228436 | 11.84945281 | 0.77005813   | 0.498992258 | 1.54322661   | 0.122775803 | 0.246340767 |
| ENSG00000228474 | 1453.731729 | 0.442545302  | 0.080403283 | 5.504070081  | 3.71E-08    | 4.21E-07    |
| ENSG00000228486 | 21.86162397 | -0.358474374 | 0.396569246 | -0.903938916 | 0.366027792 | 0.537374197 |
| ENSG00000228502 | 22.74889676 | -0.021553911 | 0.35695813  | -0.060382181 | 0.95185125  | 0.973475269 |
| ENSG00000228506 | 45.71647983 | -0.0829063   | 0.266103899 | -0.311556126 | 0.755377882 | 0.852072204 |
| ENSG00000228526 | 12.96698216 | 0.339055205  | 0.476973227 | 0.710847455  | 0.47717877  | 0.637712665 |
| ENSG00000228544 | 21.98936713 | 0.068438083  | 0.378219705 | 0.180947958  | 0.856408425 | 0.917757792 |
| ENSG00000228549 | 13.20988921 | -0.222800019 | 0.496250766 | -0.4489666   | 0.653455751 | 0.777559757 |
| ENSG00000228594 | 199.2442721 | -0.339026358 | 0.135554148 | -2.501040086 | 0.012382916 | 0.038690492 |
| ENSG00000228630 | 21.07755597 | -1.231466886 | 0.412774471 | -2.983389168 | 0.002850753 | 0.011058968 |
| ENSG00000228649 | 67.31272741 | -0.680727614 | 0.222927949 | -3.053576799 | 0.002261308 | 0.00907562  |
| ENSG00000228672 | 13.06816411 | 0.297876571  | 0.497675022 | 0.598536309  | 0.549482139 | 0.69750367  |
| ENSG00000228705 | 27.66673053 | 0.244049139  | 0.331445354 | 0.736317874  | 0.461537271 | 0.624677335 |
| ENSG00000228708 | 91.64354907 | -0.259267894 | 0.191212855 | -1.355912471 | 0.175127019 | 0.319606241 |
| ENSG00000228709 | 152.4439501 | 1.312079728  | 0.151862803 | 8.639901955  | 5.63E-18    | 1.67E-16    |
| ENSG00000228716 | 151.4756748 | -0.455248095 | 0.14942904  | -3.046583814 | 0.002314579 | 0.00925239  |
| ENSG00000228794 | 127.7961961 | 0.045579725  | 0.165711248 | 0.275055106  | 0.783273902 | 0.870531569 |
| ENSG00000228801 | 29.24324285 | -0.214209655 | 0.34081484  | -0.62852209  | 0.52966198  | 0.682186526 |
| ENSG00000228808 | 8.669937114 | -0.26238515  | 0.601613775 | -0.436135542 | 0.662738391 | 0.784604829 |
| ENSG00000228824 | 32.21438367 | -0.520169085 | 0.31483535  | -1.652194027 | 0.098495004 | 0.207274804 |
| ENSG00000228828 | 15.96576197 | -0.466896514 | 0.439971358 | -1.06119752  | 0.288600146 | 0.458749151 |
| ENSG00000228878 | 13.74354523 | -0.184326767 | 0.464085133 | -0.397183089 | 0.691232452 | 0.805563918 |
| ENSG00000228889 | 11.64400396 | -0.016497903 | 0.50231856  | -0.032843507 | 0.973799384 | 0.986408007 |
| ENSG00000228929 | 12.81464797 | -0.315994651 | 0.503030747 | -0.628181583 | 0.529884994 | 0.682240213 |
| ENSG00000228933 | 122.4347084 | 0.026962431  | 0.161083548 | 0.167381656  | 0.867069758 | 0.925440991 |
| ENSG00000228998 | 8.254583937 | 1.677071488  | 0.654314947 | 2.563095183  | 0.01037436  | 0.033317019 |
| ENSG00000229043 | 51.09478131 | -0.018366286 | 0.242551928 | -0.075721047 | 0.939641031 | 0.966654522 |
| ENSG00000229081 | 12.52274124 | 0.160165189  | 0.511306663 | 0.313246826  | 0.754093145 | 0.851326439 |
| ENSG00000229117 | 2770.429776 | 0.311113928  | 0.069700797 | 4.463563394  | 8.06E-06    | 5.91E-05    |
| ENSG00000229127 | 30.37547791 | -0.365352443 | 0.325887446 | -1.121100084 | 0.262245263 | 0.428593276 |
| ENSG00000229152 | 21.8397515  | -0.343151901 | 0.371378967 | -0.923993902 | 0.355489491 | 0.527037577 |
| ENSG00000229235 | 17.13741322 | -0.234230173 | 0.438123814 | -0.534620958 | 0.592911989 | 0.733089931 |
| ENSG00000229246 | 56.14650825 | -1.20664399  | 0.251050117 | -4.806386878 | 1.54E-06    | 1.31E-05    |
| ENSG00000229267 | 10.99618269 | -0.523005718 | 0.550871524 | -0.949415056 | 0.342409556 | 0.514366687 |
| ENSG00000229320 | 12.50264071 | -0.68294195  | 0.512243209 | -1.333237686 | 0.182453816 | 0.329425289 |
| ENSG00000229344 | 154.2960669 | 0.027094642  | 0.154664786 | 0.175183004  | 0.860935838 | 0.920923372 |

|                 |             |              |             |              |             |             |
|-----------------|-------------|--------------|-------------|--------------|-------------|-------------|
| ENSG00000229358 | 15.05679779 | 0.103269577  | 0.461332151 | 0.223850813  | 0.82287339  | 0.896348169 |
| ENSG00000229419 | 12.3730312  | -0.657051768 | 0.511305408 | -1.285047563 | 0.198775664 | 0.350564914 |
| ENSG00000229492 | 13.84901801 | 0.093598855  | 0.470202163 | 0.199060878  | 0.842215124 | 0.908438597 |
| ENSG00000229539 | 19.20090858 | 0.037884227  | 0.391759628 | 0.096702735  | 0.922962468 | 0.957522436 |
| ENSG00000229587 | 11.36246564 | 0.301899172  | 0.527357051 | 0.572475843  | 0.566999647 | 0.712464804 |
| ENSG00000229604 | 455.5622911 | -0.292152488 | 0.097720738 | -2.989667223 | 0.002792815 | 0.0108582   |
| ENSG00000229619 | 22.71337583 | -0.903026422 | 0.369861903 | -2.441523211 | 0.014625448 | 0.044535805 |
| ENSG00000229622 | 25.35529582 | 0.600998287  | 0.358145012 | 1.678086438  | 0.093330226 | 0.198818575 |
| ENSG00000229638 | 46.23872262 | 0.453005738  | 0.272898989 | 1.659975873  | 0.096919306 | 0.204510364 |
| ENSG00000229676 | 7.23010803  | -4.228845752 | 1.120260656 | -3.774876613 | 0.000160087 | 0.000877638 |
| ENSG00000229739 | 8.414577388 | -0.539835677 | 0.609983136 | -0.885000985 | 0.3761561   | 0.546004956 |
| ENSG00000229807 | 6220.823819 | 0.137259274  | 0.059929444 | 2.290347864  | 0.022001159 | 0.062371399 |
| ENSG00000229809 | 36.21196028 | 0.169387666  | 0.292749599 | 0.578609386  | 0.56285277  | 0.70902994  |
| ENSG00000229816 | 17.88894075 | 0.304282973  | 0.406872011 | 0.747859191  | 0.454545095 | 0.618431859 |
| ENSG00000229921 | 73.29631759 | 0.003454243  | 0.219009711 | 0.015772097  | 0.987416209 | 0.993427552 |
| ENSG00000229953 | 77.25012426 | -0.524477549 | 0.21484306  | -2.441212434 | 0.014638041 | 0.044564492 |
| ENSG00000229954 | 6.482194468 | -0.065901915 | 0.706998764 | -0.093213621 | 0.925733853 | 0.959334816 |
| ENSG00000229980 | 9.278384117 | -0.091075471 | 0.588299517 | -0.154811399 | 0.876970004 | 0.932041889 |
| ENSG00000229994 | 15.79034333 | -0.210178195 | 0.443365354 | -0.474051914 | 0.635462887 | 0.764634845 |
| ENSG00000230002 | 12.78037234 | -0.950454588 | 0.514482489 | -1.847399295 | 0.064689291 | 0.149578679 |
| ENSG00000230074 | 14.3838537  | -0.466081363 | 0.476793638 | -0.977532679 | 0.328305508 | 0.500640031 |
| ENSG00000230091 | 8.904995351 | -1.140161931 | 0.661638351 | -1.723240392 | 0.084845062 | 0.184835389 |
| ENSG00000230124 | 502.0844053 | -0.036598713 | 0.092189592 | -0.396993983 | 0.691371898 | 0.805616014 |
| ENSG00000230148 | 78.05594627 | -0.21132796  | 0.207595122 | -1.017981338 | 0.308686825 | 0.479925161 |
| ENSG00000230184 | 8.665227966 | -0.014148172 | 0.609548631 | -0.023210899 | 0.981482044 | 0.990660448 |
| ENSG00000230196 | 15.70482901 | -0.623370618 | 0.465329388 | -1.33963303  | 0.18036468  | 0.326618881 |
| ENSG00000230202 | 63.94261359 | -0.105732746 | 0.226772096 | -0.466251129 | 0.641035756 | 0.768258186 |
| ENSG00000230207 | 16.52032114 | 0.563099232  | 0.434916126 | 1.294730634  | 0.195413168 | 0.346545487 |
| ENSG00000230291 | 18.33023868 | -0.088678857 | 0.405564279 | -0.218655493 | 0.826918422 | 0.898668717 |
| ENSG00000230325 | 9.7036638   | -0.405334678 | 0.562967251 | -0.719996904 | 0.471526901 | 0.633407133 |
| ENSG00000230383 | 15.85844079 | 0.197024331  | 0.462554811 | 0.425948074  | 0.670145683 | 0.789527503 |
| ENSG00000230392 | 142.3416832 | 0.823783116  | 0.169101366 | 4.871534378  | 1.11E-06    | 9.70E-06    |
| ENSG00000230409 | 10.06324464 | 0.087497258  | 0.535492056 | 0.163395996  | 0.870206655 | 0.927872543 |
| ENSG00000230426 | 33.65523769 | -0.28740601  | 0.298793236 | -0.961889278 | 0.336105225 | 0.507991187 |
| ENSG00000230450 | 22.5020066  | 0.107468735  | 0.389838306 | 0.275675153  | 0.782797581 | 0.870139877 |
| ENSG00000230453 | 399.9658385 | -0.112921197 | 0.104319128 | -1.082459175 | 0.279048547 | 0.447809167 |
| ENSG00000230454 | 14.5298612  | -0.295507459 | 0.461395742 | -0.640464209 | 0.52187085  | 0.676016215 |
| ENSG00000230457 | 10.05701272 | 0.148279587  | 0.541525346 | 0.273818369  | 0.784224207 | 0.871011269 |
| ENSG00000230482 | 11.67238415 | 0.463310208  | 0.53327369  | 0.868803799  | 0.384954455 | 0.554099316 |
| ENSG00000230487 | 38.16049396 | -0.452839504 | 0.295643522 | -1.531707855 | 0.125594543 | 0.250315912 |
| ENSG00000230513 | 19.24481127 | -0.361695311 | 0.405025091 | -0.893019517 | 0.371846721 | 0.542514634 |
| ENSG00000230551 | 104.4729905 | -0.422643656 | 0.179217643 | -2.35827036  | 0.018360316 | 0.053864066 |
| ENSG00000230581 | 13.63354011 | -0.149086479 | 0.466902622 | -0.319309577 | 0.749491771 | 0.848015377 |
| ENSG00000230590 | 331.9145137 | -0.116023733 | 0.120441701 | -0.963318618 | 0.335387653 | 0.507124904 |
| ENSG00000230606 | 34.10940438 | -0.768113384 | 0.310700978 | -2.472194935 | 0.013428627 | 0.041441742 |
| ENSG00000230615 | 11.62543417 | -1.241445073 | 0.558664595 | -2.222165293 | 0.026272137 | 0.072304998 |
| ENSG00000230629 | 16.66583046 | -0.109352626 | 0.445923417 | -0.245227368 | 0.806280387 | 0.885511821 |
| ENSG00000230630 | 712.3616506 | -0.446630412 | 0.08674266  | -5.148913025 | 2.62E-07    | 2.59E-06    |
| ENSG00000230699 | 31.99463794 | -0.125853974 | 0.308484585 | -0.407974919 | 0.683292088 | 0.799704389 |
| ENSG00000230701 | 17.99642793 | 0.097324428  | 0.410719889 | 0.236960591  | 0.812687363 | 0.889844836 |

|                 |             |              |             |              |             |             |
|-----------------|-------------|--------------|-------------|--------------|-------------|-------------|
| ENSG00000230731 | 27.30109067 | -0.501345477 | 0.343858411 | -1.457999749 | 0.144840612 | 0.277795751 |
| ENSG00000230732 | 23.74779128 | -0.291494781 | 0.388494203 | -0.750319514 | 0.453062293 | 0.617396281 |
| ENSG00000230777 | 48.00517628 | 0.509649569  | 0.259099329 | 1.967004591  | 0.049182682 | 0.120320505 |
| ENSG00000230797 | 22.6531247  | 0.28558339   | 0.392138542 | 0.728271669  | 0.466447301 | 0.628880558 |
| ENSG00000230844 | 13.57643024 | 0.080702559  | 0.507715064 | 0.158952461  | 0.873706328 | 0.930050984 |
| ENSG00000230897 | 19.78751081 | 0.487674921  | 0.398861516 | 1.222667271  | 0.221455393 | 0.379225151 |
| ENSG00000230922 | 13.57109124 | -0.114510762 | 0.466438163 | -0.245500415 | 0.806068987 | 0.885358594 |
| ENSG00000230928 | 10.63989256 | -0.074219003 | 0.532019066 | -0.139504405 | 0.889051576 | 0.93933866  |
| ENSG00000230989 | 340.9525357 | -0.020820137 | 0.108888204 | -0.191206546 | 0.848363775 | 0.912928344 |
| ENSG00000231028 | 13.26171982 | -0.881155308 | 0.504917243 | -1.745147981 | 0.080959113 | 0.1782217   |
| ENSG00000231043 | 7.952616407 | -0.79610663  | 0.618169588 | -1.287845027 | 0.197799915 | 0.349320519 |
| ENSG00000231050 | 12.65862762 | 0.175774646  | 0.533184463 | 0.329669482  | 0.741649715 | 0.842008184 |
| ENSG00000231064 | 24.38926029 | -0.633263349 | 0.359414169 | -1.761932064 | 0.078080776 | 0.173274477 |
| ENSG00000231074 | 525.8928656 | -0.512071794 | 0.100478868 | -5.09631335  | 3.46E-07    | 3.36E-06    |
| ENSG00000231167 | 24.03083571 | -0.747744911 | 0.380436097 | -1.965494118 | 0.049357076 | 0.120640133 |
| ENSG00000231177 | 40.23066174 | 0.289814202  | 0.284070101 | 1.020220714  | 0.307623796 | 0.478661249 |
| ENSG00000231181 | 10.32667335 | -0.917862673 | 0.606035754 | -1.514535516 | 0.129890073 | 0.256489013 |
| ENSG00000231185 | 60.8284556  | -0.604822898 | 0.237319605 | -2.548558509 | 0.010816914 | 0.034462507 |
| ENSG00000231222 | 34.90685339 | -1.157694979 | 0.311154978 | -3.720637822 | 0.00019872  | 0.00106421  |
| ENSG00000231274 | 6.194280686 | -2.845103645 | 0.907028445 | -3.136730343 | 0.001708432 | 0.00715514  |
| ENSG00000231312 | 35.88087547 | -0.163306875 | 0.291484504 | -0.560259199 | 0.575302653 | 0.719550918 |
| ENSG00000231327 | 8.75474646  | 0.660634656  | 0.622469456 | 1.061312566  | 0.288547877 | 0.458717975 |
| ENSG00000231365 | 99.06435078 | 0.0690518    | 0.178407663 | 0.387045036  | 0.698722868 | 0.810918182 |
| ENSG00000231369 | 7.818344838 | 0.083311835  | 0.607384048 | 0.137165003  | 0.890900373 | 0.94027635  |
| ENSG00000231389 | 14.03172817 | -1.077363284 | 0.488598081 | -2.205009244 | 0.027453446 | 0.074910364 |
| ENSG00000231416 | 16.56687934 | -0.113905813 | 0.43128068  | -0.264110632 | 0.791694672 | 0.875713229 |
| ENSG00000231500 | 10988.14648 | 0.286137078  | 0.05426353  | 5.273101029  | 1.34E-07    | 1.39E-06    |
| ENSG00000231503 | 14.57566085 | -0.935551812 | 0.465896752 | -2.008066827 | 0.044636191 | 0.111526961 |
| ENSG00000231533 | 26.04246122 | -1.576632613 | 0.389468676 | -4.048162822 | 5.16E-05    | 0.000316371 |
| ENSG00000231563 | 10.64201699 | -0.472384305 | 0.528477588 | -0.89385873  | 0.371397482 | 0.54217406  |
| ENSG00000231566 | 10.29411329 | -0.043906772 | 0.574794999 | -0.076386838 | 0.939111341 | 0.966353894 |
| ENSG00000231607 | 107.8116845 | 0.106875876  | 0.175284905 | 0.60972664   | 0.542042905 | 0.691497292 |
| ENSG00000231663 | 14.33672867 | -0.019686864 | 0.489959925 | -0.040180559 | 0.967949177 | 0.983065728 |
| ENSG00000231689 | 25.56108283 | -0.09807081  | 0.337981268 | -0.290166408 | 0.771688934 | 0.86337203  |
| ENSG00000231690 | 8.562914223 | -0.955869312 | 0.601129739 | -1.590121483 | 0.111807424 | 0.228777697 |
| ENSG00000231697 | 9.871970911 | -1.098697432 | 0.583249339 | -1.883752556 | 0.059598454 | 0.139973162 |
| ENSG00000231721 | 754.7986824 | 1.223314195  | 0.089935156 | 13.6021802   | 3.89E-42    | 3.23E-40    |
| ENSG00000231744 | 8.2439491   | -1.068647705 | 0.617853664 | -1.729612961 | 0.083699449 | 0.183049379 |
| ENSG00000231770 | 12.99112855 | -0.593517385 | 0.478324991 | -1.240824535 | 0.214670576 | 0.370701814 |
| ENSG00000231784 | 12.15339674 | 0.002877368  | 0.495037323 | 0.005812427  | 0.99536238  | 0.997940364 |
| ENSG00000231789 | 20.1055014  | -1.78769344  | 0.431802875 | -4.140068405 | 3.47E-05    | 0.000221391 |
| ENSG00000231806 | 146.331975  | -0.036608884 | 0.158746962 | -0.230611556 | 0.817616589 | 0.892507031 |
| ENSG00000231856 | 9.896711941 | 0.560229294  | 0.558151698 | 1.003722278  | 0.315512496 | 0.486941084 |
| ENSG00000231871 | 8.007981749 | -0.156703711 | 0.63306337  | -0.247532424 | 0.804496201 | 0.88418419  |
| ENSG00000231887 | 53.37746986 | -0.654903276 | 0.247024598 | -2.651166246 | 0.008021435 | 0.026826874 |
| ENSG00000231888 | 16.32044121 | 0.078549036  | 0.441982992 | 0.177719591  | 0.858943199 | 0.919492083 |
| ENSG00000231889 | 38.77441678 | 0.171280768  | 0.279283947 | 0.613285402  | 0.539687644 | 0.689745459 |
| ENSG00000231925 | 884.0201318 | 0.064076046  | 0.086357792 | 0.741983379  | 0.458097406 | 0.621909177 |
| ENSG00000232004 | 9.513204028 | 0.125091894  | 0.585454648 | 0.213666242  | 0.830807339 | 0.901344809 |
| ENSG00000232024 | 13.27803714 | 0.064179943  | 0.496141305 | 0.129358193  | 0.897074227 | 0.944134611 |



|                 |             |              |             |              |             |             |
|-----------------|-------------|--------------|-------------|--------------|-------------|-------------|
| ENSG00000232040 | 17.34443007 | -1.107458483 | 0.454958221 | -2.434198202 | 0.01492482  | 0.045329502 |
| ENSG00000232046 | 12.50839065 | -0.624115403 | 0.504923288 | -1.236059847 | 0.216436319 | 0.37281189  |
| ENSG00000232093 | 8.885272869 | 0.338210804  | 0.571739801 | 0.591546719  | 0.554154161 | 0.701279595 |
| ENSG00000232098 | 56.66292151 | 0.090607672  | 0.235002445 | 0.38556055   | 0.699822155 | 0.811562424 |
| ENSG00000232104 | 25.04725389 | -0.730717064 | 0.353872878 | -2.064914012 | 0.038931137 | 0.099683865 |
| ENSG00000232110 | 37.90488237 | -6.137008166 | 0.866736937 | -7.080589163 | 1.44E-12    | 2.82E-11    |
| ENSG00000232112 | 606.3848936 | 0.381358347  | 0.08681294  | 4.392874454  | 1.12E-05    | 7.94E-05    |
| ENSG00000232119 | 119.0994311 | 0.265315873  | 0.170474766 | 1.556335165  | 0.119628414 | 0.241335678 |
| ENSG00000232160 | 14.8882917  | -0.389302541 | 0.467103497 | -0.833439577 | 0.404596862 | 0.572631951 |
| ENSG00000232177 | 3635.960842 | -0.494906064 | 0.316934107 | -1.561542455 | 0.118395815 | 0.239192581 |
| ENSG00000232282 | 7.369130609 | -0.565159751 | 0.702134075 | -0.804917138 | 0.420867498 | 0.588378475 |
| ENSG00000232320 | 8.882021213 | 0.385997538  | 0.570342629 | 0.676781847  | 0.498544377 | 0.656577243 |
| ENSG00000232346 | 39.95532808 | 0.264000724  | 0.27770745  | 0.95064329   | 0.341785485 | 0.513702195 |
| ENSG00000232373 | 18.30048396 | 0.150522312  | 0.413324733 | 0.364174462  | 0.715727736 | 0.823072248 |
| ENSG00000232387 | 28.9503047  | 0.171040102  | 0.327273834 | 0.522620768  | 0.601238185 | 0.739437208 |
| ENSG00000232388 | 17.71197612 | 0.179926091  | 0.40414782  | 0.445198717  | 0.656176154 | 0.779542155 |
| ENSG00000232412 | 7.415155931 | -0.475429276 | 0.649419194 | -0.732083808 | 0.464117416 | 0.627026563 |
| ENSG00000232434 | 180.4291788 | 0.290583427  | 0.1464362   | 1.984368803  | 0.047214741 | 0.116539355 |
| ENSG00000232442 | 45.97180058 | 0.206864521  | 0.268284221 | 0.771064809  | 0.440668518 | 0.60586547  |
| ENSG00000232445 | 97.06502131 | -0.143506569 | 0.182272805 | -0.787317497 | 0.43109603  | 0.597552486 |
| ENSG00000232447 | 28.40410729 | -0.851758173 | 0.357484423 | -2.382644161 | 0.0171888   | 0.051089945 |
| ENSG00000232526 | 23.72062867 | 0.059985519  | 0.394260844 | 0.152146782  | 0.879071167 | 0.933709844 |
| ENSG00000232533 | 10.17706001 | -0.105499646 | 0.541300177 | -0.194900446 | 0.845470885 | 0.910611721 |
| ENSG00000232545 | 7.697671812 | -0.59565749  | 0.621532406 | -0.958369159 | 0.337876641 | 0.509885824 |
| ENSG00000232573 | 37.90852738 | 0.143886802  | 0.28724178  | 0.500925741  | 0.616423386 | 0.750779831 |
| ENSG00000232586 | 21.35967863 | -0.513872788 | 0.403841457 | -1.272461703 | 0.203209123 | 0.356186492 |
| ENSG00000232587 | 20.45930364 | -0.203322679 | 0.400813967 | -0.507274436 | 0.611962273 | 0.747707172 |
| ENSG00000232593 | 87.79317589 | -0.200951511 | 0.192293807 | -1.045023311 | 0.296012196 | 0.466490851 |
| ENSG00000232648 | 18.66704212 | 0.354384138  | 0.397522124 | 0.891482803  | 0.372670213 | 0.543151359 |
| ENSG00000232656 | 9.580498403 | -0.493478185 | 0.575207395 | -0.857913492 | 0.390940234 | 0.559276654 |
| ENSG00000232671 | 20.69191239 | -0.000878957 | 0.393958508 | -0.002231089 | 0.99821985  | 0.999144522 |
| ENSG00000232855 | 35.01706587 | -6.004901709 | 0.867895112 | -6.918925603 | 4.55E-12    | 8.38E-11    |
| ENSG00000232859 | 30.50590507 | -0.872075286 | 0.33404401  | -2.610659856 | 0.009036773 | 0.029624164 |
| ENSG00000232888 | 78.43601553 | -0.145207595 | 0.202219028 | -0.718070878 | 0.472713585 | 0.633981332 |
| ENSG00000232931 | 361.5176151 | -0.193246776 | 0.121093676 | -1.595845314 | 0.110523334 | 0.226791078 |
| ENSG00000232940 | 11.83697709 | -0.597504411 | 0.51037724  | -1.170711318 | 0.241714834 | 0.404354922 |
| ENSG00000232956 | 204.6751757 | 0.085901261  | 0.130909325 | 0.656189015  | 0.511702516 | 0.667791925 |
| ENSG00000232973 | 17.9317769  | -3.755931308 | 0.645206399 | -5.821286515 | 5.84E-09    | 7.41E-08    |
| ENSG00000232995 | 11.54546722 | -0.337908983 | 0.507843829 | -0.665379716 | 0.505807655 | 0.663390746 |
| ENSG00000233006 | 14.16046472 | -0.0373351   | 0.456035586 | -0.081868831 | 0.934751021 | 0.964622949 |
| ENSG00000233008 | 9.452379723 | -3.655701442 | 0.859394991 | -4.253808178 | 2.10E-05    | 0.000140581 |
| ENSG00000233016 | 541.500694  | 0.543407292  | 0.103138757 | 5.268701211  | 1.37E-07    | 1.42E-06    |
| ENSG00000233080 | 14.88687673 | -5.326381115 | 1.059804199 | -5.025816204 | 5.01E-07    | 4.73E-06    |
| ENSG00000233098 | 629.4226268 | 0.175894182  | 0.091329634 | 1.925926708  | 0.054113526 | 0.129759764 |
| ENSG00000233101 | 66.57903489 | -2.848110933 | 0.279949797 | -10.17364886 | 2.60E-24    | 1.10E-22    |
| ENSG00000233175 | 16.92614168 | -0.148162606 | 0.428117908 | -0.346078973 | 0.729283365 | 0.832773591 |
| ENSG00000233184 | 19.60077664 | -0.768618159 | 0.398885976 | -1.926911965 | 0.053990602 | 0.129509219 |
| ENSG00000233215 | 54.81078839 | 1.99012524   | 0.263654416 | 7.548234053  | 4.41E-14    | 1.00E-12    |
| ENSG00000233223 | 17.107196   | -0.37684827  | 0.421685323 | -0.893671773 | 0.371497532 | 0.542230448 |
| ENSG00000233230 | 7.066803465 | -1.023159297 | 0.674922824 | -1.51596488  | 0.129528233 | 0.256012817 |

|                 |             |              |             |              |             |             |
|-----------------|-------------|--------------|-------------|--------------|-------------|-------------|
| ENSG00000233237 | 9.472931053 | -0.229150419 | 0.578973013 | -0.395787737 | 0.692261624 | 0.806274442 |
| ENSG00000233421 | 10.33917265 | 0.479718216  | 0.5386977   | 0.890514692  | 0.373189583 | 0.54340148  |
| ENSG00000233452 | 5.764195116 | -1.65610656  | 0.774018818 | -2.139620539 | 0.032385445 | 0.085672006 |
| ENSG00000233476 | 12.04698029 | -0.485476335 | 0.513136496 | -0.9460959   | 0.344099675 | 0.515855724 |
| ENSG00000233491 | 77.61686052 | -0.683760951 | 0.219854227 | -3.110065062 | 0.001870461 | 0.007732305 |
| ENSG00000233527 | 12.69804338 | -0.441293951 | 0.504133039 | -0.875352172 | 0.381382315 | 0.550886667 |
| ENSG00000233558 | 23.24495301 | 0.641664424  | 0.401726145 | 1.597268268  | 0.110205921 | 0.226391133 |
| ENSG00000233560 | 8.712277977 | 0.207371025  | 0.600051056 | 0.345588967  | 0.729651639 | 0.832888023 |
| ENSG00000233579 | 13.72274077 | -0.201860029 | 0.464259431 | -0.43480006  | 0.663707561 | 0.784970962 |
| ENSG00000233593 | 18.89028015 | -0.375722369 | 0.403548166 | -0.93104715  | 0.351829175 | 0.523476795 |
| ENSG00000233622 | 9.133890793 | -1.603560745 | 0.665704817 | -2.408816498 | 0.016004343 | 0.04815014  |
| ENSG00000233695 | 87.53192762 | 2.50619519   | 0.222680424 | 11.25467224  | 2.20E-29    | 1.16E-27    |
| ENSG00000233723 | 10.03787422 | -1.336223063 | 0.594457557 | -2.247802297 | 0.024588799 | 0.068341683 |
| ENSG00000233757 | 116.9269229 | -0.184745387 | 0.174760687 | -1.057133559 | 0.290450637 | 0.460752129 |
| ENSG00000233762 | 17.70496292 | -0.177715692 | 0.4155984   | -0.427613996 | 0.668932175 | 0.788491923 |
| ENSG00000233822 | 637.4548896 | -0.326382454 | 0.090838267 | -3.593006153 | 0.000326885 | 0.001657543 |
| ENSG00000233871 | 7.418651623 | 0.444269624  | 0.64429294  | 0.689546007  | 0.490479732 | 0.650039512 |
| ENSG00000233875 | 7.403079503 | 0.321971048  | 0.657652649 | 0.489576143  | 0.624433862 | 0.756091928 |
| ENSG00000233901 | 21.43390136 | -0.221483086 | 0.385898463 | -0.573941352 | 0.566007489 | 0.711600035 |
| ENSG00000233913 | 448.6724443 | 0.353340088  | 0.290772565 | 1.215176845  | 0.22429865  | 0.382628019 |
| ENSG00000233922 | 11.94426557 | -0.549858915 | 0.509254497 | -1.079733058 | 0.280261068 | 0.449067691 |
| ENSG00000233927 | 622.1771158 | 0.21483809   | 0.247146257 | 0.869275113  | 0.384696672 | 0.553785012 |
| ENSG00000233937 | 24.35906692 | 0.162473299  | 0.347374404 | 0.467718109  | 0.639986189 | 0.767565619 |
| ENSG00000233954 | 67.62107659 | 0.403133642  | 0.236220078 | 1.706601933  | 0.087896066 | 0.189716662 |
| ENSG00000233966 | 10.81847622 | 0.48261019   | 0.541552694 | 0.89116017   | 0.372843249 | 0.543291402 |
| ENSG00000233967 | 34.04298567 | -0.076753658 | 0.306681393 | -0.250271649 | 0.80237728  | 0.882476797 |
| ENSG00000234031 | 7.216365931 | -0.179453453 | 0.667999032 | -0.268643282 | 0.788204202 | 0.873316329 |
| ENSG00000234072 | 24.6868722  | -0.51718017  | 0.355115321 | -1.456372452 | 0.145289687 | 0.278428953 |
| ENSG00000234127 | 399.3227445 | 0.263697326  | 0.097007376 | 2.718322448  | 0.006561386 | 0.022515788 |
| ENSG00000234129 | 12.5181102  | -0.787586745 | 0.497740037 | -1.582325483 | 0.113575286 | 0.231551821 |
| ENSG00000234147 | 33.02803979 | -0.956257636 | 0.314719254 | -3.038446567 | 0.002378013 | 0.009465555 |
| ENSG00000234160 | 9.934835093 | 0.170762695  | 0.561154618 | 0.304305961  | 0.760894804 | 0.855550842 |
| ENSG00000234171 | 163.7277367 | -0.65798008  | 0.145306361 | -4.528226259 | 5.95E-06    | 4.49E-05    |
| ENSG00000234176 | 17.27904805 | 0.059407701  | 0.419102798 | 0.141749713  | 0.887277706 | 0.93824263  |
| ENSG00000234219 | 12.72216645 | 0.182673403  | 0.48066129  | 0.380046004  | 0.703911266 | 0.814364144 |
| ENSG00000234284 | 23.2984965  | -0.430652929 | 0.357749348 | -1.203783964 | 0.228673089 | 0.387522124 |
| ENSG00000234297 | 16.04057287 | 0.225114654  | 0.435016359 | 0.517485491  | 0.604817295 | 0.741997252 |
| ENSG00000234327 | 49.14208004 | -0.01989917  | 0.248207032 | -0.080171662 | 0.936100728 | 0.964881635 |
| ENSG00000234329 | 16.48521928 | -0.414717566 | 0.435989034 | -0.951211003 | 0.341497274 | 0.513488783 |
| ENSG00000234373 | 28.85628101 | -0.200626659 | 0.332547399 | -0.603302444 | 0.546307507 | 0.694729455 |
| ENSG00000234420 | 883.6848178 | 0.02192989   | 0.076904104 | 0.285158899  | 0.775522407 | 0.86552026  |
| ENSG00000234432 | 12.29551542 | -0.150462329 | 0.492414025 | -0.305560608 | 0.759939217 | 0.855152302 |
| ENSG00000234473 | 18.28827586 | -0.421680915 | 0.41248732  | -1.02228819  | 0.306644521 | 0.477595697 |
| ENSG00000234497 | 4.423919851 | -5.425404171 | 1.349370511 | -4.020692705 | 5.80E-05    | 0.000351189 |
| ENSG00000234518 | 9.975678831 | 0.974524971  | 0.571796322 | 1.704321859  | 0.088320973 | 0.190428966 |
| ENSG00000234545 | 123.4528829 | 0.185478392  | 0.16395734  | 1.131260065  | 0.257945648 | 0.42358692  |
| ENSG00000234602 | 24.83662023 | 1.673012979  | 0.374696137 | 4.464985929  | 8.01E-06    | 5.87E-05    |
| ENSG00000234608 | 41.24234203 | 0.527487966  | 0.28649156  | 1.841198971  | 0.065592406 | 0.151218863 |
| ENSG00000234616 | 234.175805  | -0.052723626 | 0.128071475 | -0.41167345  | 0.680578787 | 0.797671275 |
| ENSG00000234617 | 20.41459157 | -0.70629043  | 0.422238426 | -1.67272893  | 0.094380671 | 0.200539297 |

|                 |             |              |             |              |             |             |
|-----------------|-------------|--------------|-------------|--------------|-------------|-------------|
| ENSG00000234648 | 17.01023736 | 0.089540145  | 0.436073287 | 0.205332791  | 0.837312127 | 0.905074151 |
| ENSG00000234665 | 14.9017137  | -0.027398671 | 0.453773253 | -0.060379651 | 0.951853265 | 0.973475269 |
| ENSG00000234684 | 29.24500676 | -1.129138873 | 0.366169528 | -3.083650573 | 0.002044776 | 0.008320675 |
| ENSG00000234705 | 11.97000729 | -0.426329913 | 0.509968151 | -0.835993213 | 0.403158721 | 0.571460198 |
| ENSG00000234709 | 14.88704462 | -0.076143442 | 0.453593747 | -0.167867045 | 0.866687876 | 0.925244308 |
| ENSG00000234737 | 19.49466678 | -0.052245064 | 0.385909147 | -0.13538177  | 0.892310036 | 0.941285707 |
| ENSG00000234740 | 10.15236431 | -0.573627742 | 0.553523675 | -1.036320157 | 0.300052805 | 0.470406446 |
| ENSG00000234741 | 2254.429135 | 0.351242576  | 0.058685725 | 5.985145057  | 2.16E-09    | 2.90E-08    |
| ENSG00000234745 | 725.3108767 | 1.490720996  | 0.197920194 | 7.531929756  | 5.00E-14    | 1.13E-12    |
| ENSG00000234753 | 19.20698176 | 0.989674218  | 0.407657612 | 2.427709403  | 0.015194512 | 0.046009337 |
| ENSG00000234771 | 170.3857489 | -0.058507777 | 0.161369878 | -0.36256938  | 0.716926587 | 0.823776505 |
| ENSG00000234782 | 13.67468951 | 0.172050728  | 0.474779136 | 0.362380558  | 0.717067666 | 0.823803836 |
| ENSG00000234788 | 10.92924043 | -0.336527777 | 0.522435567 | -0.644151735 | 0.519477045 | 0.674158727 |
| ENSG00000234851 | 15.23651044 | 0.287388648  | 0.451662131 | 0.636291218  | 0.524586628 | 0.677908773 |
| ENSG00000234886 | 9.459953755 | -0.276706429 | 0.577528037 | -0.479122072 | 0.631851789 | 0.761725204 |
| ENSG00000234911 | 8.239800509 | -0.226276463 | 0.597506155 | -0.378701477 | 0.704909557 | 0.815025133 |
| ENSG00000234912 | 26.6697564  | 0.134259468  | 0.342697413 | 0.391772634  | 0.695226217 | 0.808564553 |
| ENSG00000234913 | 6.774019253 | 1.192747992  | 0.718464153 | 1.660135703  | 0.096887156 | 0.204501687 |
| ENSG00000234996 | 10.22322302 | -0.313910009 | 0.557357847 | -0.56321089  | 0.573291288 | 0.717878752 |
| ENSG00000235034 | 34.51598952 | 0.005214385  | 0.296884953 | 0.017563657  | 0.98598695  | 0.992629448 |
| ENSG00000235072 | 15.86008634 | -0.41563091  | 0.442298936 | -0.939705878 | 0.347368449 | 0.519221095 |
| ENSG00000235082 | 10.22266807 | -0.335522444 | 0.536337209 | -0.625581143 | 0.53158971  | 0.683312652 |
| ENSG00000235092 | 32.50141304 | 1.097412831  | 0.312554526 | 3.511108426  | 0.000446242 | 0.002190205 |
| ENSG00000235106 | 214.0572746 | -0.452833962 | 0.132400892 | -3.420173052 | 0.000625813 | 0.002958868 |
| ENSG00000235109 | 23.42071721 | -0.622278002 | 0.371623371 | -1.674485652 | 0.094035192 | 0.199926191 |
| ENSG00000235162 | 150.0192709 | -0.146280389 | 0.147086581 | -0.994518929 | 0.319970295 | 0.49159168  |
| ENSG00000235169 | 86.95449189 | -0.489189021 | 0.190839918 | -2.563347466 | 0.010366824 | 0.033309877 |
| ENSG00000235173 | 216.8336272 | 0.420410122  | 0.132814618 | 3.165390438  | 0.00154875  | 0.006564661 |
| ENSG00000235194 | 49.99783821 | -0.011145201 | 0.250747347 | -0.044447931 | 0.964547356 | 0.981383315 |
| ENSG00000235217 | 37.12902908 | -0.389906913 | 0.290181603 | -1.34366517  | 0.179056685 | 0.324908693 |
| ENSG00000235225 | 15.58680419 | -0.394044807 | 0.452671355 | -0.870487612 | 0.384033986 | 0.553227915 |
| ENSG00000235244 | 74.54538769 | -0.00779559  | 0.204286634 | -0.038160059 | 0.969560066 | 0.984132542 |
| ENSG00000235257 | 38.17754239 | -0.230189796 | 0.283634306 | -0.811572476 | 0.41703699  | 0.58499287  |
| ENSG00000235272 | 21.76001278 | -0.20304827  | 0.403091115 | -0.503727971 | 0.61445255  | 0.749042347 |
| ENSG00000235279 | 17.87481602 | -0.940489323 | 0.426431592 | -2.205486981 | 0.02741994  | 0.074833476 |
| ENSG00000235316 | 28.07075344 | 0.196218215  | 0.329012836 | 0.596384679  | 0.550918273 | 0.698621617 |
| ENSG00000235381 | 27.44691367 | -0.083470028 | 0.330371237 | -0.252655252 | 0.80053463  | 0.880976166 |
| ENSG00000235408 | 15.78667111 | -0.131090559 | 0.452130435 | -0.289939692 | 0.771862375 | 0.86337203  |
| ENSG00000235411 | 19.99929761 | -0.971116437 | 0.412146    | -2.356243754 | 0.018460799 | 0.054092376 |
| ENSG00000235437 | 402.0570301 | -0.143067427 | 0.102331468 | -1.398078514 | 0.162089491 | 0.301932248 |
| ENSG00000235453 | 32.93874332 | -0.048862859 | 0.303280014 | -0.161114668 | 0.872003088 | 0.928844619 |
| ENSG00000235501 | 39.23425172 | 0.034174112  | 0.278292243 | 0.122799368  | 0.902265974 | 0.947258155 |
| ENSG00000235508 | 40.15411154 | 0.068125031  | 0.279513648 | 0.243727028  | 0.80744224  | 0.886174009 |
| ENSG00000235529 | 18.98006123 | 0.713479612  | 0.412558118 | 1.729403883  | 0.083736836 | 0.183102635 |
| ENSG00000235530 | 12.54705693 | 0.237504278  | 0.509562855 | 0.466094174  | 0.641148093 | 0.768299941 |
| ENSG00000235552 | 15.70818143 | -0.010946127 | 0.436693473 | -0.025065928 | 0.980002377 | 0.989867936 |
| ENSG00000235559 | 18.4017013  | 0.029747758  | 0.455726015 | 0.065275532  | 0.947954624 | 0.971185078 |
| ENSG00000235587 | 11.79134918 | 0.404098237  | 0.511586774 | 0.789891877  | 0.429590916 | 0.596349797 |
| ENSG00000235613 | 26.82366187 | -0.279321193 | 0.338478771 | -0.825225145 | 0.409243781 | 0.577637398 |
| ENSG00000235616 | 15.02454379 | -6.213911022 | 1.231228814 | -5.046918127 | 4.49E-07    | 4.26E-06    |

|                 |             |              |             |              |             |             |
|-----------------|-------------|--------------|-------------|--------------|-------------|-------------|
| ENSG00000235652 | 10.60384281 | -0.477725315 | 0.539831903 | -0.884951986 | 0.376182528 | 0.546004956 |
| ENSG00000235655 | 15.86080647 | -0.128669622 | 0.444849297 | -0.289243172 | 0.772395297 | 0.863565484 |
| ENSG00000235683 | 9.291809596 | -0.385464772 | 0.568031146 | -0.678597951 | 0.497392641 | 0.655493567 |
| ENSG00000235701 | 8.256904573 | -0.708001177 | 0.614013964 | -1.153070156 | 0.24888159  | 0.413038861 |
| ENSG00000235703 | 51.6639064  | -0.282247153 | 0.247358739 | -1.141043788 | 0.253851701 | 0.418674985 |
| ENSG00000235706 | 10.32796367 | -1.234255692 | 0.572022098 | -2.157706312 | 0.030950673 | 0.082587347 |
| ENSG00000235748 | 24.80380174 | 0.020954154  | 0.343790785 | 0.060950308  | 0.951398784 | 0.973382375 |
| ENSG00000235750 | 11.25109947 | 0.397947974  | 0.542821466 | 0.733110238  | 0.463491196 | 0.626567302 |
| ENSG00000235786 | 13.28839208 | -0.185234595 | 0.489604598 | -0.37833508  | 0.705181688 | 0.815025133 |
| ENSG00000235823 | 226.739812  | -0.568638941 | 0.139028543 | -4.090087761 | 4.31E-05    | 0.000269209 |
| ENSG00000235859 | 34.98738436 | -1.342884042 | 0.347012734 | -3.869840817 | 0.000108906 | 0.000621873 |
| ENSG00000235890 | 59.94507083 | 0.185797035  | 0.230134301 | 0.807341772  | 0.419469604 | 0.587278278 |
| ENSG00000235917 | 19.6770943  | 0.223244677  | 0.390710749 | 0.571380946  | 0.567741442 | 0.713205512 |
| ENSG00000235920 | 26.26991075 | -1.472187135 | 0.367541948 | -4.00549418  | 6.19E-05    | 0.000372947 |
| ENSG00000235954 | 38.539838   | -0.305860451 | 0.291202991 | -1.05033417  | 0.2935645   | 0.463987641 |
| ENSG00000235961 | 24.97302009 | 1.238630262  | 0.356964198 | 3.469900533  | 0.000520651 | 0.002511534 |
| ENSG00000235994 | 9.715179572 | -0.291264843 | 0.553956018 | -0.525790556 | 0.599033737 | 0.737672211 |
| ENSG00000236017 | 20.17188943 | 0.230204454  | 0.422053472 | 0.545439072  | 0.585451574 | 0.727328526 |
| ENSG00000236081 | 25.64326015 | 6.410967306  | 1.062884171 | 6.031670693  | 1.62E-09    | 2.20E-08    |
| ENSG00000236088 | 53.25149807 | 0.036685688  | 0.246493773 | 0.148830078  | 0.881687716 | 0.934792614 |
| ENSG00000236104 | 94.7701326  | -0.096135472 | 0.189519622 | -0.507258676 | 0.611973329 | 0.747707172 |
| ENSG00000236144 | 109.8879234 | -0.338026717 | 0.177970014 | -1.89934646  | 0.057518938 | 0.135998741 |
| ENSG00000236200 | 9.168095621 | -0.502884779 | 0.568731667 | -0.884221521 | 0.376576643 | 0.546267833 |
| ENSG00000236254 | 8.696641054 | -0.432307286 | 0.583425507 | -0.740981121 | 0.458704887 | 0.622312879 |
| ENSG00000236255 | 57.1743964  | -0.272815329 | 0.237349355 | -1.149425193 | 0.250380697 | 0.414458832 |
| ENSG00000236287 | 242.2681705 | -0.202337204 | 0.121499664 | -1.665331378 | 0.095846662 | 0.203070597 |
| ENSG00000236333 | 13.9883545  | -3.403133804 | 0.674578567 | -5.044829428 | 4.54E-07    | 4.30E-06    |
| ENSG00000236352 | 16.83060264 | -1.534743108 | 0.452748102 | -3.389838858 | 0.000699337 | 0.003267994 |
| ENSG00000236397 | 7.521816877 | 0.745272572  | 0.640879474 | 1.162890377  | 0.244873982 | 0.408278318 |
| ENSG00000236423 | 10.22538874 | 0.443537905  | 0.551652908 | 0.804016254  | 0.421387588 | 0.588978253 |
| ENSG00000236432 | 25.51054829 | -0.376545694 | 0.357763651 | -1.052498468 | 0.292570913 | 0.46317408  |
| ENSG00000236440 | 7.070167302 | -0.168781328 | 0.662465112 | -0.254777686 | 0.798894811 | 0.880369923 |
| ENSG00000236449 | 13.72369332 | 1.938907121  | 0.511474885 | 3.790815894  | 0.000150153 | 0.000828763 |
| ENSG00000236451 | 8.119685989 | -2.732473249 | 0.76578217  | -3.568212159 | 0.000359425 | 0.00180574  |
| ENSG00000236456 | 14.30045239 | -0.773561283 | 0.516188488 | -1.498602353 | 0.133976822 | 0.262478719 |
| ENSG00000236519 | 12.96717302 | 0.358473555  | 0.485630841 | 0.738160604  | 0.46041686  | 0.623671709 |
| ENSG00000236552 | 55.18150016 | 0.039177243  | 0.240294937 | 0.163038156  | 0.870488392 | 0.927945136 |
| ENSG00000236609 | 82.60734175 | -0.661617413 | 0.198103711 | -3.339752753 | 0.00083853  | 0.003839254 |
| ENSG00000236618 | 45.54055915 | -0.38925424  | 0.268823636 | -1.447991128 | 0.147619532 | 0.281817282 |
| ENSG00000236651 | 10.04363613 | -0.808831152 | 0.555805946 | -1.455240193 | 0.145602777 | 0.278876767 |
| ENSG00000236671 | 22.13228942 | -2.516306865 | 0.452683222 | -5.558648394 | 2.72E-08    | 3.13E-07    |
| ENSG00000236682 | 11.46202125 | -0.056036659 | 0.520195339 | -0.107722339 | 0.914215949 | 0.953636867 |
| ENSG00000236711 | 10.65071385 | 0.095664332  | 0.519242376 | 0.184238299  | 0.853826516 | 0.916179136 |
| ENSG00000236753 | 23.7775739  | 0.080575779  | 0.351901431 | 0.228972581  | 0.818890227 | 0.893294325 |
| ENSG00000236778 | 11.01522681 | -0.109657058 | 0.536865025 | -0.204254427 | 0.838154681 | 0.905588709 |
| ENSG00000236780 | 14.9141298  | -3.076360887 | 0.607478739 | -5.064145772 | 4.10E-07    | 3.93E-06    |
| ENSG00000236810 | 10.65133949 | 0.762375357  | 0.557792126 | 1.36677325   | 0.17169639  | 0.314824216 |
| ENSG00000236859 | 21.69156654 | 0.258601179  | 0.369492178 | 0.699882688  | 0.48400057  | 0.644492938 |
| ENSG00000236871 | 8.276153209 | -0.007981742 | 0.596824834 | -0.013373675 | 0.989329669 | 0.994711464 |
| ENSG00000236901 | 33.83068499 | -1.03751071  | 0.318089041 | -3.261699014 | 0.001107467 | 0.004916746 |

|                 |             |              |             |              |             |             |
|-----------------|-------------|--------------|-------------|--------------|-------------|-------------|
| ENSG00000236914 | 7.983679726 | -0.151985256 | 0.634902273 | -0.239383701 | 0.810808067 | 0.888548987 |
| ENSG00000236924 | 18.77723595 | 0.184186566  | 0.391904339 | 0.469978379  | 0.638370465 | 0.766295498 |
| ENSG00000236956 | 11.35382386 | 0.080156367  | 0.507915156 | 0.157814481  | 0.874602988 | 0.930511866 |
| ENSG00000237004 | 20.7833539  | -0.450447142 | 0.394697029 | -1.141247866 | 0.25376679  | 0.418674985 |
| ENSG00000237036 | 12.72496149 | -0.151512813 | 0.478157633 | -0.316867916 | 0.751343828 | 0.8494267   |
| ENSG00000237037 | 21.111008   | -0.110337046 | 0.380958671 | -0.289629965 | 0.772099341 | 0.86337203  |
| ENSG00000237125 | 97.11351891 | 5.419865655  | 0.402898537 | 13.45218501  | 2.99E-41    | 2.46E-39    |
| ENSG00000237172 | 16.28908673 | 1.14303372   | 0.446677793 | 2.558966974  | 0.010498371 | 0.033579485 |
| ENSG00000237187 | 504.8887839 | -0.025274908 | 0.099745874 | -0.253393016 | 0.799964524 | 0.880924836 |
| ENSG00000237190 | 158.9167067 | 0.013959332  | 0.148909192 | 0.093743923  | 0.925312578 | 0.959110521 |
| ENSG00000237280 | 26.74216066 | -0.115603294 | 0.343551272 | -0.336495024 | 0.736497603 | 0.837902473 |
| ENSG00000237289 | 25.38940518 | -1.840543258 | 0.384984534 | -4.780823893 | 1.75E-06    | 1.47E-05    |
| ENSG00000237298 | 130.4548794 | -0.464013425 | 0.163742482 | -2.833799882 | 0.004599813 | 0.016687389 |
| ENSG00000237356 | 19.45383492 | -0.238045617 | 0.395867472 | -0.601326541 | 0.547622515 | 0.695834778 |
| ENSG00000237361 | 34.49733893 | -0.514641199 | 0.312176558 | -1.64855812  | 0.099238195 | 0.208464023 |
| ENSG00000237399 | 9.886803403 | 0.125660683  | 0.594073354 | 0.21152385   | 0.832478524 | 0.902022973 |
| ENSG00000237429 | 9.047383638 | 0.357157103  | 0.577525822 | 0.618426205  | 0.536294428 | 0.687065174 |
| ENSG00000237441 | 225.9648522 | -0.300705241 | 0.12893959  | -2.33214051  | 0.019693301 | 0.057061013 |
| ENSG00000237457 | 7.251422108 | -2.895813708 | 0.85417798  | -3.390176023 | 0.000698478 | 0.003265063 |
| ENSG00000237461 | 11.37654431 | -1.088249066 | 0.529820706 | -2.053994971 | 0.039976178 | 0.101767839 |
| ENSG00000237491 | 21.69929398 | 1.339440066  | 0.397546318 | 3.369267948  | 0.000753681 | 0.003487141 |
| ENSG00000237493 | 8.702365602 | -0.218994111 | 0.581780546 | -0.376420477 | 0.706604325 | 0.815786221 |
| ENSG00000237505 | 4.8632648   | -4.51094361  | 1.334947494 | -3.379116878 | 0.000727191 | 0.003381281 |
| ENSG00000237523 | 19.22049172 | 0.757574147  | 0.396465502 | 1.91081984   | 0.056027737 | 0.133348293 |
| ENSG00000237638 | 8.569224895 | -0.664667438 | 0.590390256 | -1.125810312 | 0.260245818 | 0.426417008 |
| ENSG00000237649 | 384.9408896 | -0.013026112 | 0.112138855 | -0.116160558 | 0.907525295 | 0.950634438 |
| ENSG00000237748 | 11.22071855 | -0.486019451 | 0.516595092 | -0.94081314  | 0.346800626 | 0.518797486 |
| ENSG00000237765 | 21.05814862 | -0.39328728  | 0.385354602 | -1.020585399 | 0.30745091  | 0.478533289 |
| ENSG00000237877 | 38.16302099 | -1.118199967 | 0.295630482 | -3.782424466 | 0.000155308 | 0.000854865 |
| ENSG00000237883 | 6.341352552 | -1.757345713 | 0.749430558 | -2.344908003 | 0.019031775 | 0.055430094 |
| ENSG00000237886 | 21.52663104 | 0.229692325  | 0.383352765 | 0.599166997  | 0.549061528 | 0.69718384  |
| ENSG00000237973 | 114.3711812 | -0.169841527 | 0.172979187 | -0.98186105  | 0.326168307 | 0.498318638 |
| ENSG00000237975 | 75.37178106 | -2.438844578 | 0.253545262 | -9.618971214 | 6.65E-22    | 2.49E-20    |
| ENSG00000237976 | 9.287082741 | -0.211372661 | 0.605104033 | -0.349316232 | 0.726851914 | 0.831258753 |
| ENSG00000237984 | 17.96745564 | -0.379311207 | 0.436878282 | -0.868230861 | 0.385267963 | 0.554220656 |
| ENSG00000238045 | 8.838545387 | -0.974716388 | 0.614049262 | -1.587358617 | 0.112431446 | 0.229853664 |
| ENSG00000238058 | 17.21417552 | 0.177182348  | 0.438041108 | 0.404487947  | 0.685853939 | 0.801843308 |
| ENSG00000238083 | 27.12581999 | 0.16130538   | 0.338961349 | 0.475881336  | 0.63415892  | 0.763476761 |
| ENSG00000238113 | 13.11627324 | 0.842493672  | 0.494052766 | 1.70527063   | 0.088143962 | 0.190105672 |
| ENSG00000238227 | 173.0696283 | 0.415808718  | 0.175433758 | 2.370175065  | 0.017779664 | 0.052468686 |
| ENSG00000238554 | 142.0938779 | -0.067872261 | 0.17954016  | -0.378033865 | 0.705405437 | 0.81513904  |
| ENSG00000238578 | 15.48182593 | 0.214678533  | 0.456583009 | 0.470185111  | 0.63822277  | 0.766295498 |
| ENSG00000238741 | 1636.355118 | -0.297315825 | 0.163928156 | -1.813695898 | 0.069724557 | 0.158584983 |
| ENSG00000238825 | 23.01705098 | 0.85859717   | 0.364141678 | 2.357865694  | 0.018380342 | 0.053894691 |
| ENSG00000238835 | 8.239029162 | -3.110788472 | 0.82100261  | -3.789011674 | 0.000151248 | 0.000834477 |
| ENSG00000238961 | 132.2418217 | -0.105314751 | 0.188592053 | -0.558426237 | 0.576553361 | 0.720601927 |
| ENSG00000239002 | 34.04578566 | 0.106756945  | 0.35352815  | 0.301975797  | 0.762670513 | 0.856852972 |
| ENSG00000239039 | 25.83058029 | 0.10215935   | 0.372955027 | 0.273918683  | 0.784147114 | 0.871011269 |
| ENSG00000239213 | 10.48089578 | -0.760035799 | 0.540631079 | -1.405830756 | 0.159774387 | 0.298530302 |
| ENSG00000239218 | 12.80874091 | -0.040135761 | 0.494659084 | -0.081138226 | 0.935332026 | 0.964726409 |

|                 |             |              |             |              |             |             |
|-----------------|-------------|--------------|-------------|--------------|-------------|-------------|
| ENSG00000239264 | 275.3778772 | 0.316688077  | 0.117216839 | 2.701728512  | 0.006898006 | 0.02349001  |
| ENSG00000239291 | 12.98631498 | -0.346336728 | 0.481742211 | -0.718925434 | 0.472186865 | 0.633869351 |
| ENSG00000239305 | 95.2200859  | -0.231607273 | 0.182458946 | -1.269366491 | 0.204310382 | 0.357575049 |
| ENSG00000239306 | 667.3888922 | 0.124404637  | 0.086892595 | 1.431705846  | 0.152228023 | 0.288402768 |
| ENSG00000239382 | 16.42886185 | 0.055486185  | 0.432535066 | 0.128281356  | 0.897926319 | 0.944497571 |
| ENSG00000239407 | 15.8116752  | -0.2859186   | 0.431547107 | -0.662543196 | 0.507623161 | 0.664441509 |
| ENSG00000239415 | 11.79384548 | 0.001818242  | 0.524527971 | 0.003466435  | 0.99723419  | 0.998813347 |
| ENSG00000239523 | 25.48283232 | -0.165221834 | 0.359418016 | -0.459692687 | 0.645736819 | 0.771840121 |
| ENSG00000239569 | 59.14989673 | 0.774119858  | 0.255577816 | 3.028900825  | 0.002454452 | 0.009736711 |
| ENSG00000239653 | 52.20467619 | 0.087320259  | 0.246336175 | 0.35447599   | 0.722982195 | 0.828279902 |
| ENSG00000239672 | 424.1330349 | 0.455976611  | 0.121767172 | 3.744659617  | 0.000180639 | 0.000977815 |
| ENSG00000239697 | 22.76552117 | 0.385039198  | 0.366537423 | 1.050477179  | 0.293498778 | 0.463987641 |
| ENSG00000239779 | 15.83202127 | -0.062861782 | 0.431358742 | -0.145729705 | 0.88413477  | 0.936256398 |
| ENSG00000239789 | 29.12469856 | 0.563228049  | 0.322777488 | 1.744942166  | 0.080994937 | 0.178272622 |
| ENSG00000239857 | 87.40100247 | 0.223471206  | 0.195026036 | 1.145853193  | 0.251855901 | 0.416459075 |
| ENSG00000239883 | 24.19485514 | -0.497973911 | 0.351653843 | -1.416091195 | 0.156748806 | 0.294561936 |
| ENSG00000239887 | 9.594587267 | 0.06014829   | 0.555928424 | 0.108194305  | 0.913841562 | 0.953578158 |
| ENSG00000239899 | 115.5961375 | -0.97916162  | 0.208334052 | -4.699959569 | 2.60E-06    | 2.12E-05    |
| ENSG00000239900 | 114.4348856 | 0.248592501  | 0.168978731 | 1.471146698  | 0.141251448 | 0.272683793 |
| ENSG00000240053 | 16.64385383 | -0.426069657 | 0.42751381  | -0.996621973 | 0.318948036 | 0.490460776 |
| ENSG00000240057 | 7.798708609 | -0.956966093 | 0.640181879 | -1.494834711 | 0.134957585 | 0.263811466 |
| ENSG00000240065 | 11.72310852 | -0.23590393  | 0.535926918 | -0.44017929  | 0.659807258 | 0.782521221 |
| ENSG00000240103 | 10.90357314 | -0.043620621 | 0.524219318 | -0.083210632 | 0.933684059 | 0.963875944 |
| ENSG00000240137 | 16.22508148 | -0.55406883  | 0.44075234  | -1.257097876 | 0.208718196 | 0.363214136 |
| ENSG00000240184 | 121.4313739 | -1.588238354 | 0.176752005 | -8.985687907 | 2.57E-19    | 8.40E-18    |
| ENSG00000240204 | 20.86650112 | 0.363994041  | 0.378544966 | 0.961560909  | 0.336270216 | 0.508131209 |
| ENSG00000240230 | 221.6614443 | -0.10049546  | 0.132201809 | -0.760167056 | 0.447154734 | 0.612141365 |
| ENSG00000240270 | 10.05282255 | -0.482424194 | 0.598237225 | -0.80640952  | 0.420006759 | 0.587769236 |
| ENSG00000240288 | 84.40785518 | 0.024542284  | 0.208987934 | 0.117433977  | 0.906516161 | 0.950002425 |
| ENSG00000240291 | 25.52792026 | 0.227338647  | 0.355980283 | 0.638627074  | 0.523065564 | 0.67669018  |
| ENSG00000240303 | 36.68292743 | 0.017185004  | 0.292147047 | 0.05882313   | 0.953092985 | 0.974299858 |
| ENSG00000240342 | 226.1369291 | 0.285180447  | 0.125106496 | 2.279501506  | 0.022637271 | 0.063797179 |
| ENSG00000240344 | 176.0985704 | -0.065785936 | 0.139070269 | -0.47304098  | 0.636183943 | 0.765174745 |
| ENSG00000240356 | 14.44881546 | 0.055137893  | 0.460532251 | 0.119726453  | 0.904699844 | 0.948877676 |
| ENSG00000240370 | 28.86835332 | -0.257494302 | 0.332040513 | -0.775490617 | 0.438049808 | 0.603559162 |
| ENSG00000240376 | 28.01069479 | 0.333574098  | 0.342723445 | 0.973303994  | 0.330402238 | 0.50267088  |
| ENSG00000240409 | 59.86252819 | -0.255103392 | 0.229755174 | -1.110327082 | 0.266858107 | 0.43356648  |
| ENSG00000240429 | 29.21925108 | -0.264497905 | 0.319303824 | -0.828358087 | 0.407467736 | 0.575837828 |
| ENSG00000240445 | 59.77651259 | -0.272762972 | 0.233433177 | -1.168484172 | 0.24261152  | 0.405372193 |
| ENSG00000240489 | 7.527263781 | -0.093082819 | 0.639454779 | -0.145565913 | 0.884264079 | 0.936322743 |
| ENSG00000240498 | 7.708888572 | -0.171709451 | 0.615995554 | -0.27875112  | 0.780435828 | 0.868545562 |
| ENSG00000240616 | 11.07555892 | 0.05737682   | 0.508119929 | 0.112919838  | 0.910094108 | 0.951381168 |
| ENSG00000240682 | 60.48223222 | 0.216502423  | 0.22626947  | 0.956834443  | 0.338650825 | 0.510520298 |
| ENSG00000240694 | 12.12011102 | 0.823886748  | 0.504443694 | 1.633258099  | 0.102414725 | 0.21372934  |
| ENSG00000240695 | 37.76979416 | -0.04477813  | 0.289811775 | -0.154507629 | 0.877209497 | 0.932155367 |
| ENSG00000240764 | 9.950678306 | 0.132278671  | 0.572418416 | 0.231087378  | 0.817246921 | 0.892507031 |
| ENSG00000240771 | 70.69440955 | -0.187724643 | 0.225128443 | -0.833855735 | 0.404362284 | 0.572415298 |
| ENSG00000240809 | 79.77618301 | 2.81207924   | 0.251864841 | 11.16503294  | 6.05E-29    | 3.10E-27    |
| ENSG00000240849 | 98.82458529 | -0.275031284 | 0.184054145 | -1.494295521 | 0.135098395 | 0.264011089 |
| ENSG00000240857 | 80.27283859 | 0.015752585  | 0.197563299 | 0.079734368  | 0.936448525 | 0.965098491 |

|                 |             |              |             |              |             |             |
|-----------------|-------------|--------------|-------------|--------------|-------------|-------------|
| ENSG00000240859 | 11.37689866 | -0.346407853 | 0.533738547 | -0.649021615 | 0.516324405 | 0.671307749 |
| ENSG00000240869 | 10.46003036 | -0.129834671 | 0.533905293 | -0.243179216 | 0.807866567 | 0.886465967 |
| ENSG00000240875 | 9.463476706 | -0.451266765 | 0.616449912 | -0.732041251 | 0.46414339  | 0.627026563 |
| ENSG00000240889 | 13.45606829 | 0.546679213  | 0.48719406  | 1.122097452  | 0.261821007 | 0.428099137 |
| ENSG00000240950 | 14.29522615 | 0.25924728   | 0.462706721 | 0.560284234  | 0.57528558  | 0.719550918 |
| ENSG00000240972 | 1482.783946 | 0.436235749  | 0.075478287 | 5.779619115  | 7.49E-09    | 9.37E-08    |
| ENSG00000240990 | 37.77614896 | -1.807348902 | 0.322114637 | -5.610887232 | 2.01E-08    | 2.37E-07    |
| ENSG00000241015 | 32.33797656 | 0.4554832    | 0.327615333 | 1.390298786  | 0.164438166 | 0.305416227 |
| ENSG00000241058 | 102.19254   | 0.32229399   | 0.183659692 | 1.754843357  | 0.079286105 | 0.175252859 |
| ENSG00000241061 | 11.56607297 | 0.044063194  | 0.539511611 | 0.081672373  | 0.934907248 | 0.964624614 |
| ENSG00000241081 | 12.44749525 | 0.622602393  | 0.492159843 | 1.265041025  | 0.205856622 | 0.359391992 |
| ENSG00000241127 | 61.29158553 | -0.089488049 | 0.221049112 | -0.404833333 | 0.685600025 | 0.801750213 |
| ENSG00000241157 | 7.65279944  | -0.024875401 | 0.633547865 | -0.039263649 | 0.968680188 | 0.983424201 |
| ENSG00000241258 | 182.8135049 | 0.291162594  | 0.134048741 | 2.172065115  | 0.029850752 | 0.080113395 |
| ENSG00000241288 | 29.38082648 | -0.899400165 | 0.338380119 | -2.657958064 | 0.007861567 | 0.026349663 |
| ENSG00000241316 | 20.68004058 | -0.852925096 | 0.394575569 | -2.161626728 | 0.03064696  | 0.081968363 |
| ENSG00000241343 | 89.10577498 | -0.100690752 | 0.187245256 | -0.537747947 | 0.590751073 | 0.731770751 |
| ENSG00000241360 | 24.01910603 | 0.288973364  | 0.358948233 | 0.80505582   | 0.420787469 | 0.588373639 |
| ENSG00000241370 | 29.74620152 | 0.674473562  | 0.340486517 | 1.980911218  | 0.047601231 | 0.117328389 |
| ENSG00000241399 | 23.50618797 | -0.214293189 | 0.356221394 | -0.601573047 | 0.547458375 | 0.695834778 |
| ENSG00000241404 | 10.72088435 | 0.553266707  | 0.547022333 | 1.011415209  | 0.311817745 | 0.483295141 |
| ENSG00000241468 | 139.6538893 | 0.559857146  | 0.152800791 | 3.663967578  | 0.000248338 | 0.001297705 |
| ENSG00000241478 | 9.62614634  | 0.556134585  | 0.55958732  | 0.993829856  | 0.320305708 | 0.491999375 |
| ENSG00000241484 | 32.27599215 | -0.36706869  | 0.356725788 | -1.028993984 | 0.303482502 | 0.474358887 |
| ENSG00000241506 | 15.33140991 | 0.018295444  | 0.440971442 | 0.041488955  | 0.966906098 | 0.982787985 |
| ENSG00000241529 | 54.94698968 | -1.258176966 | 0.256290302 | -4.909186791 | 9.15E-07    | 8.17E-06    |
| ENSG00000241553 | 168.1170541 | 0.133690468  | 0.161929765 | 0.825607745  | 0.409026641 | 0.577621114 |
| ENSG00000241634 | 18.2049491  | -0.259560199 | 0.406695517 | -0.638217508 | 0.523332102 | 0.676910316 |
| ENSG00000241680 | 12.14139738 | 1.086994524  | 0.509827256 | 2.132083978  | 0.032999944 | 0.087051682 |
| ENSG00000241685 | 54.66717424 | -0.018869643 | 0.244259931 | -0.077252305 | 0.938422833 | 0.966102042 |
| ENSG00000241764 | 11.9586318  | 0.828673952  | 0.50233731  | 1.64963648   | 0.099017309 | 0.208093378 |
| ENSG00000241772 | 18.75145638 | 0.025752437  | 0.403391358 | 0.063839834  | 0.94909776  | 0.971789214 |
| ENSG00000241837 | 107.3189785 | 0.182802855  | 0.197514589 | 0.925515708  | 0.354697717 | 0.526128704 |
| ENSG00000241839 | 53.3076346  | -0.08356251  | 0.260440023 | -0.320851263 | 0.748323109 | 0.846897737 |
| ENSG00000241852 | 58.95683384 | 0.217759717  | 0.232280536 | 0.937485855  | 0.348508696 | 0.520494777 |
| ENSG00000241878 | 77.08630555 | -0.20591112  | 0.203956451 | -1.009583757 | 0.312694755 | 0.484076461 |
| ENSG00000241945 | 56.23971646 | 0.241756506  | 0.24971148  | 0.968143339  | 0.332972788 | 0.505268311 |
| ENSG00000241973 | 682.7068635 | 0.056721232  | 0.081774174 | 0.693632587  | 0.487912652 | 0.647922265 |
| ENSG00000242021 | 14.31538521 | -0.427223771 | 0.466199514 | -0.91639686  | 0.359458782 | 0.530724985 |
| ENSG00000242028 | 23.44413428 | -0.17718745  | 0.358480641 | -0.494273414 | 0.621113098 | 0.754086058 |
| ENSG00000242071 | 26.40443561 | 0.360557671  | 0.349446422 | 1.031796718  | 0.302167357 | 0.472771761 |
| ENSG00000242086 | 102.6868329 | -0.304028628 | 0.190758929 | -1.593784514 | 0.110984307 | 0.227590739 |
| ENSG00000242114 | 27.35628892 | -0.006776874 | 0.343347909 | -0.01973763  | 0.984252672 | 0.992000554 |
| ENSG00000242125 | 1022.639113 | 0.429290207  | 0.086561172 | 4.959385337  | 7.07E-07    | 6.47E-06    |
| ENSG00000242173 | 26.63324047 | 1.505315406  | 0.370642348 | 4.061369172  | 4.88E-05    | 0.00030136  |
| ENSG00000242193 | 39.2217761  | -0.046019775 | 0.27761737  | -0.165766916 | 0.868340383 | 0.926585944 |
| ENSG00000242247 | 144.9450367 | 0.127211301  | 0.154323991 | 0.824313191  | 0.409761625 | 0.578173226 |
| ENSG00000242259 | 152.980144  | -0.038116471 | 0.157221958 | -0.242437322 | 0.808441318 | 0.886924024 |
| ENSG00000242299 | 38.60047167 | 0.123852955  | 0.283337982 | 0.437120904  | 0.662023668 | 0.784101725 |
| ENSG00000242372 | 344.6399077 | 0.37253165   | 0.114805073 | 3.244905811  | 0.001174895 | 0.005163876 |

|                 |             |              |             |              |             |             |
|-----------------|-------------|--------------|-------------|--------------|-------------|-------------|
| ENSG00000242474 | 20.26268855 | -0.557904498 | 0.389616459 | -1.43193257  | 0.15216312  | 0.288402768 |
| ENSG00000242485 | 430.7935704 | 0.17866318   | 0.101256437 | 1.764462447  | 0.077654153 | 0.172487015 |
| ENSG00000242498 | 299.6367136 | -0.317629301 | 0.112391263 | -2.826103138 | 0.004711809 | 0.017023062 |
| ENSG00000242588 | 353.6577117 | 0.231723173  | 0.111511085 | 2.078028143  | 0.037706767 | 0.097115321 |
| ENSG00000242612 | 61.27600997 | -0.062898094 | 0.231787004 | -0.27136161  | 0.786112926 | 0.872030977 |
| ENSG00000242616 | 64.64898947 | 0.148948605  | 0.227207769 | 0.655561233  | 0.512106476 | 0.66817385  |
| ENSG00000242622 | 18.73590038 | -0.443467146 | 0.400177983 | -1.108174775 | 0.267786343 | 0.434665444 |
| ENSG00000242689 | 9.866516147 | -0.020185381 | 0.54408593  | -0.03709962  | 0.970405575 | 0.984539698 |
| ENSG00000242732 | 144.7237007 | 0.204467977  | 0.152918534 | 1.337103952  | 0.181188707 | 0.3278575   |
| ENSG00000242802 | 124.0269122 | 0.290960168  | 0.16716312  | 1.740576324  | 0.081757871 | 0.179754705 |
| ENSG00000242861 | 10.49325538 | 0.223602159  | 0.527959536 | 0.423521395  | 0.671914892 | 0.79081596  |
| ENSG00000243056 | 23.79280607 | 0.910789545  | 0.372072809 | 2.447879886  | 0.014369955 | 0.043879177 |
| ENSG00000243107 | 6.913450594 | 0.150587193  | 0.711595239 | 0.211619169  | 0.832404153 | 0.902011968 |
| ENSG00000243147 | 544.3147351 | 0.306291454  | 0.088920357 | 3.444559441  | 0.000571991 | 0.00272827  |
| ENSG00000243155 | 22.1080668  | -0.646180155 | 0.373396399 | -1.730547368 | 0.083532526 | 0.182769687 |
| ENSG00000243156 | 541.1986087 | -0.129212464 | 0.090263194 | -1.431507784 | 0.152284738 | 0.288410909 |
| ENSG00000243176 | 19.73180612 | -0.751561441 | 0.416850235 | -1.802953142 | 0.071395574 | 0.161470557 |
| ENSG00000243199 | 16.83547968 | 0.017134053  | 0.417560055 | 0.041033744  | 0.967268994 | 0.982880628 |
| ENSG00000243232 | 61.66952246 | 0.433553019  | 0.225450147 | 1.923054942  | 0.05447315  | 0.130481271 |
| ENSG00000243244 | 34.02417626 | -0.003762339 | 0.304155977 | -0.012369767 | 0.990130606 | 0.994914727 |
| ENSG00000243279 | 299.0208101 | 1.1856662    | 0.124339114 | 9.535745939  | 1.49E-21    | 5.46E-20    |
| ENSG00000243317 | 165.6667617 | 0.593096787  | 0.151028223 | 3.927059301  | 8.60E-05    | 0.000502878 |
| ENSG00000243335 | 51.16274412 | -0.070346901 | 0.244456737 | -0.287768304 | 0.773524101 | 0.864345959 |
| ENSG00000243364 | 31.95008987 | 0.233683918  | 0.30354029  | 0.769861286  | 0.441382181 | 0.60654127  |
| ENSG00000243403 | 10.30989769 | -0.391122003 | 0.543769463 | -0.719279088 | 0.471968978 | 0.633818202 |
| ENSG00000243449 | 115.789327  | 1.196574779  | 0.185448334 | 6.452335006  | 1.10E-10    | 1.73E-09    |
| ENSG00000243477 | 35.4462434  | 0.41793614   | 0.30559682  | 1.367606312  | 0.17143534  | 0.314504514 |
| ENSG00000243547 | 15.49109337 | 0.226453535  | 0.456577049 | 0.495980986  | 0.619907826 | 0.753273809 |
| ENSG00000243609 | 10.92994483 | 0.549833747  | 0.51754784  | 1.062382459  | 0.288062094 | 0.458124652 |
| ENSG00000243646 | 21.44656411 | -0.924767021 | 0.403640902 | -2.291063704 | 0.021959729 | 0.062279087 |
| ENSG00000243660 | 16.59101252 | -0.363476888 | 0.452485286 | -0.803289962 | 0.421807159 | 0.589447389 |
| ENSG00000243667 | 30.14464514 | -0.823962567 | 0.336284534 | -2.450194654 | 0.0142779   | 0.043619328 |
| ENSG00000243678 | 129.5310799 | 0.363908883  | 0.183418281 | 1.98403824   | 0.047251577 | 0.116568828 |
| ENSG00000243696 | 11.7801622  | 0.547733156  | 0.512330948 | 1.069100272  | 0.285024489 | 0.454557107 |
| ENSG00000243701 | 26.46451555 | -0.030449285 | 0.34128312  | -0.089220016 | 0.928907058 | 0.961275781 |
| ENSG00000243716 | 150.2454466 | 0.278993269  | 0.158385542 | 1.761481915  | 0.078156871 | 0.173384329 |
| ENSG00000243725 | 85.49064675 | 0.007143339  | 0.18971494  | 0.037653013  | 0.96996434  | 0.984394442 |
| ENSG00000243766 | 53.03189944 | -2.606340369 | 0.306491133 | -8.503803503 | 1.83E-17    | 5.23E-16    |
| ENSG00000243927 | 132.6447053 | 0.229187699  | 0.177214049 | 1.29328177   | 0.195913623 | 0.347068876 |
| ENSG00000243978 | 7.082013362 | -2.255384588 | 0.75500731  | -2.987235433 | 0.002815128 | 0.010938896 |
| ENSG00000243989 | 14.17231882 | 0.339622673  | 0.460828364 | 0.736983006  | 0.461132684 | 0.624460697 |
| ENSG00000244005 | 242.5417405 | 0.111197791  | 0.128800598 | 0.863332876  | 0.387954474 | 0.556567387 |
| ENSG00000244038 | 1163.327743 | 0.267484167  | 0.075558969 | 3.540071707  | 0.000400018 | 0.001984831 |
| ENSG00000244041 | 15.45456472 | 0.975002412  | 0.501505757 | 1.944149988  | 0.051877367 | 0.125490162 |
| ENSG00000244045 | 74.95541452 | 0.142055671  | 0.206429097 | 0.688157206  | 0.491353789 | 0.651075057 |
| ENSG00000244055 | 19.08034007 | 0.378066726  | 0.399906064 | 0.945388829  | 0.344460403 | 0.516231226 |
| ENSG00000244119 | 12.92274498 | -0.414643671 | 0.503793341 | -0.823043176 | 0.410483441 | 0.578921777 |
| ENSG00000244125 | 40.03935904 | 0.490062069  | 0.297482423 | 1.647364789  | 0.099483088 | 0.208884745 |
| ENSG00000244165 | 105.1231861 | 0.034890706  | 0.186441475 | 0.18714026   | 0.851550663 | 0.914865313 |
| ENSG00000244187 | 125.356967  | -0.081380425 | 0.169426702 | -0.480328212 | 0.630994032 | 0.761038109 |



|                 |             |              |             |              |             |             |
|-----------------|-------------|--------------|-------------|--------------|-------------|-------------|
| ENSG00000244274 | 32.16953777 | 0.181788001  | 0.323481839 | 0.561972819  | 0.574134539 | 0.718419883 |
| ENSG00000244300 | 81.09109422 | 0.09526882   | 0.207702213 | 0.45867985   | 0.646464086 | 0.772319358 |
| ENSG00000244313 | 22.78336878 | 0.099748719  | 0.371860464 | 0.268242335  | 0.78851279  | 0.873546869 |
| ENSG00000244398 | 15.04028145 | -0.422197444 | 0.44679139  | -0.944954296 | 0.34468221  | 0.51645344  |
| ENSG00000244405 | 350.1689052 | -0.226443233 | 0.103826238 | -2.180982741 | 0.029184693 | 0.078731973 |
| ENSG00000244462 | 821.0013168 | -0.134356783 | 0.084517177 | -1.589697959 | 0.111902904 | 0.228906377 |
| ENSG00000244486 | 103.6769252 | 0.735984202  | 0.374625146 | 1.964588361  | 0.0494619   | 0.12085429  |
| ENSG00000244491 | 11.80402363 | -0.481604691 | 0.52822583  | -0.911740138 | 0.361905529 | 0.532657897 |
| ENSG00000244509 | 1020.16507  | -0.013329142 | 0.075835092 | -0.175764825 | 0.860478705 | 0.920644708 |
| ENSG00000244578 | 50.67123379 | -0.631203655 | 0.256104296 | -2.464635171 | 0.013715282 | 0.042157236 |
| ENSG00000244625 | 24.45205143 | -0.022217952 | 0.367252696 | -0.060497724 | 0.951759229 | 0.973475269 |
| ENSG00000244642 | 57.49120238 | -1.320134389 | 0.257890106 | -5.118980361 | 3.07E-07    | 2.99E-06    |
| ENSG00000244649 | 22.56402408 | -1.004440353 | 0.373865811 | -2.686633342 | 0.007217613 | 0.024495244 |
| ENSG00000244675 | 13.84198936 | -0.188784371 | 0.465445487 | -0.405599316 | 0.685037032 | 0.801225244 |
| ENSG00000244687 | 53.61323052 | -0.253178164 | 0.24570313  | -1.03042303  | 0.302811467 | 0.47346312  |
| ENSG00000244694 | 11.79971502 | -2.757194984 | 0.648358492 | -4.252577882 | 2.11E-05    | 0.000141221 |
| ENSG00000244754 | 877.3716627 | 0.020234104  | 0.079951932 | 0.253078366  | 0.800207656 | 0.880924836 |
| ENSG00000244879 | 311.4356447 | -0.399705941 | 0.118436754 | -3.374847139 | 0.000738567 | 0.003427371 |
| ENSG00000244921 | 31.50921214 | -0.185344337 | 0.318612907 | -0.581722628 | 0.560753527 | 0.707146494 |
| ENSG00000245105 | 14.25665583 | -0.445662992 | 0.504376287 | -0.883592278 | 0.376916349 | 0.546505362 |
| ENSG00000245146 | 10.9455677  | 0.038795219  | 0.523794731 | 0.074065691  | 0.940958115 | 0.967262249 |
| ENSG00000245149 | 16.69266482 | 0.454674506  | 0.452241209 | 1.00538053   | 0.314713651 | 0.486120812 |
| ENSG00000245205 | 22.36552531 | 0.105858266  | 0.417164098 | 0.253756894  | 0.799683377 | 0.880893381 |
| ENSG00000245213 | 13.87596177 | -0.210297507 | 0.47422303  | -0.443456969 | 0.657435238 | 0.78050987  |
| ENSG00000245248 | 15.35008159 | -0.943062361 | 0.454561281 | -2.074664958 | 0.038017597 | 0.097736674 |
| ENSG00000245384 | 73.58633433 | -1.776263306 | 0.225908954 | -7.862739708 | 3.76E-15    | 9.10E-14    |
| ENSG00000245498 | 24.18919915 | -0.325319491 | 0.371399934 | -0.875927704 | 0.381069337 | 0.550538001 |
| ENSG00000245532 | 2233.612541 | -0.033102931 | 0.155350998 | -0.213084764 | 0.831260848 | 0.901477895 |
| ENSG00000245534 | 9.204357951 | -0.402486632 | 0.579969699 | -0.693978725 | 0.487695551 | 0.647877758 |
| ENSG00000245556 | 32.22287599 | -0.505616604 | 0.310105668 | -1.630465534 | 0.103003144 | 0.214639543 |
| ENSG00000245571 | 9.638519249 | -0.335144685 | 0.566232889 | -0.591884879 | 0.55392768  | 0.701056142 |
| ENSG00000245573 | 20.38748657 | -0.722058156 | 0.389104318 | -1.855692993 | 0.06349733  | 0.147330714 |
| ENSG00000245685 | 15.62665696 | -0.354510404 | 0.448284108 | -0.790816353 | 0.429051166 | 0.595953894 |
| ENSG00000245750 | 9.749744014 | -0.901523662 | 0.572094502 | -1.575829969 | 0.115064994 | 0.233909981 |
| ENSG00000245848 | 127.8706078 | -0.025168456 | 0.169387583 | -0.148585011 | 0.881881101 | 0.934927082 |
| ENSG00000245849 | 36.44803561 | 0.005466847  | 0.290700333 | 0.018805782  | 0.984996041 | 0.992271901 |
| ENSG00000245857 | 18.99994068 | -2.171545003 | 0.470553527 | -4.614873504 | 3.93E-06    | 3.08E-05    |
| ENSG00000245910 | 706.3354597 | 0.430208648  | 0.095056959 | 4.525798573  | 6.02E-06    | 4.54E-05    |
| ENSG00000245937 | 335.924511  | -0.257187996 | 0.105932851 | -2.427839829 | 0.01518905  | 0.046002712 |
| ENSG00000245970 | 11.45921602 | -0.350223625 | 0.533329858 | -0.656673576 | 0.511390828 | 0.667550131 |
| ENSG00000246067 | 60.67526603 | -0.363853976 | 0.227626261 | -1.598470995 | 0.109938195 | 0.225973344 |
| ENSG00000246089 | 30.50859857 | 0.114721754  | 0.316109261 | 0.362918044  | 0.716666108 | 0.823611946 |
| ENSG00000246090 | 12.08440092 | -1.168411494 | 0.520289722 | -2.245693978 | 0.024723616 | 0.068621347 |
| ENSG00000246095 | 19.39763405 | 5.425571658  | 0.894057142 | 6.068484219  | 1.29E-09    | 1.77E-08    |
| ENSG00000246174 | 8.226856654 | -0.827682561 | 0.62898101  | -1.315910254 | 0.188204167 | 0.336949264 |
| ENSG00000246263 | 32.31796423 | -0.026375012 | 0.319094411 | -0.082655826 | 0.934125211 | 0.964118797 |
| ENSG00000246273 | 25.37119065 | -0.339391946 | 0.362065925 | -0.937376102 | 0.348565129 | 0.520494777 |
| ENSG00000246334 | 10.76152338 | 0.304410144  | 0.526552811 | 0.578118924  | 0.563183832 | 0.709256167 |
| ENSG00000246560 | 16.38965081 | -0.121885872 | 0.426648584 | -0.28568212  | 0.775121601 | 0.865324687 |
| ENSG00000246596 | 10.38259306 | -0.261802925 | 0.556976017 | -0.470043443 | 0.63832398  | 0.766295498 |

|                 |             |              |             |              |             |             |
|-----------------|-------------|--------------|-------------|--------------|-------------|-------------|
| ENSG00000246695 | 41.76833385 | -0.570886265 | 0.270897927 | -2.107385137 | 0.035084209 | 0.091620726 |
| ENSG00000246705 | 113.9975274 | -0.6557383   | 0.173319589 | -3.78340558  | 0.000154697 | 0.000852168 |
| ENSG00000246731 | 9.016111579 | -1.371654045 | 0.61611075  | -2.226310845 | 0.025993368 | 0.071650085 |
| ENSG00000246877 | 13.12260311 | 0.683408646  | 0.49439741  | 1.382306283  | 0.166877678 | 0.308722605 |
| ENSG00000246889 | 26.27058659 | 0.470896864  | 0.357493656 | 1.317217402  | 0.187765763 | 0.336292958 |
| ENSG00000246922 | 56.19956913 | 0.308331011  | 0.23702022  | 1.300863745  | 0.193305098 | 0.344079718 |
| ENSG00000246985 | 34.36942996 | -2.451097695 | 0.381737409 | -6.420899905 | 1.35E-10    | 2.10E-09    |
| ENSG00000247077 | 361.4262994 | 0.399202374  | 0.115641995 | 3.45205367   | 0.000556337 | 0.002662646 |
| ENSG00000247081 | 27.8299499  | -2.233642769 | 0.393107734 | -5.68201176  | 1.33E-08    | 1.61E-07    |
| ENSG00000247092 | 26.98065839 | -0.302808811 | 0.348799795 | -0.868145039 | 0.385314938 | 0.554220656 |
| ENSG00000247095 | 11.43679607 | 1.142610325  | 0.553573684 | 2.064061854  | 0.039011852 | 0.099835942 |
| ENSG00000247121 | 12.12607297 | -1.082240809 | 0.510015926 | -2.121974539 | 0.033839876 | 0.088916712 |
| ENSG00000247134 | 49.69750064 | -2.960922047 | 0.33168314  | -8.926959782 | 4.38E-19    | 1.42E-17    |
| ENSG00000247137 | 27.78926963 | -0.238385504 | 0.343782719 | -0.6934191   | 0.488046579 | 0.647922265 |
| ENSG00000247151 | 9.337101037 | -0.488273625 | 0.572103122 | -0.853471351 | 0.393397968 | 0.561420427 |
| ENSG00000247240 | 16.32320636 | 0.162662744  | 0.459017827 | 0.3543713    | 0.72306064  | 0.828279902 |
| ENSG00000247271 | 33.92303833 | -0.516808383 | 0.317792425 | -1.626245126 | 0.10389752  | 0.215926685 |
| ENSG00000247315 | 336.9644732 | -0.266140878 | 0.111343185 | -2.390275416 | 0.016835742 | 0.050157301 |
| ENSG00000247317 | 9.923760018 | 0.045956154  | 0.544431143 | 0.084411325  | 0.932729403 | 0.963270344 |
| ENSG00000247373 | 18.16459746 | 0.597759372  | 0.405649098 | 1.473587334  | 0.140592734 | 0.27166143  |
| ENSG00000247400 | 10.34651971 | -0.885600356 | 0.544402063 | -1.62673953  | 0.103792429 | 0.215867235 |
| ENSG00000247516 | 22.10194311 | 0.756829658  | 0.381371724 | 1.984493374  | 0.047200866 | 0.116525583 |
| ENSG00000247556 | 627.0542869 | -0.149543221 | 0.093164278 | -1.605156236 | 0.108459426 | 0.22348974  |
| ENSG00000247572 | 39.77840797 | -1.058661439 | 0.290021375 | -3.650287641 | 0.000261947 | 0.00136129  |
| ENSG00000247595 | 20.95725144 | 0.117121502  | 0.377149766 | 0.310543747  | 0.756147497 | 0.852524592 |
| ENSG00000247596 | 178.3571694 | 0.219344785  | 0.15257352  | 1.437633373  | 0.150538107 | 0.285912491 |
| ENSG00000247626 | 71.21268836 | 0.379875282  | 0.210971701 | 1.80059828   | 0.071766221 | 0.162021874 |
| ENSG00000247627 | 2269.419751 | -0.490529028 | 0.08935407  | -5.48972226  | 4.03E-08    | 4.53E-07    |
| ENSG00000247708 | 114.9832606 | -1.763423787 | 0.187578584 | -9.400986753 | 5.41E-21    | 1.94E-19    |
| ENSG00000247735 | 11.78652954 | -0.338453146 | 0.514786695 | -0.657462885 | 0.510883328 | 0.66738381  |
| ENSG00000247746 | 39.89706567 | -1.53458501  | 0.302857484 | -5.067020264 | 4.04E-07    | 3.88E-06    |
| ENSG00000247796 | 20.67827274 | -0.110260107 | 0.386880517 | -0.284997827 | 0.775645807 | 0.86552026  |
| ENSG00000247828 | 294.6316107 | -0.00288939  | 0.110655087 | -0.026111675 | 0.979168265 | 0.989381141 |
| ENSG00000247934 | 9.861840428 | 0.541478677  | 0.550164009 | 0.984213194  | 0.3250107   | 0.496998182 |
| ENSG00000247950 | 9.586102893 | -0.920809309 | 0.566137198 | -1.626477315 | 0.103848155 | 0.215867235 |
| ENSG00000247982 | 19.95159957 | -0.465902093 | 0.393628457 | -1.18360877  | 0.236567967 | 0.39772109  |
| ENSG00000248008 | 112.9546936 | 0.037780091  | 0.170410006 | 0.221701129  | 0.824546551 | 0.897443469 |
| ENSG00000248015 | 19.49014409 | -0.905520932 | 0.411646174 | -2.199755492 | 0.027824247 | 0.075789646 |
| ENSG00000248019 | 11.96865    | -0.093935841 | 0.508305078 | -0.184802091 | 0.853384268 | 0.916032577 |
| ENSG00000248049 | 83.60135805 | 0.203549041  | 0.190590825 | 1.067989715  | 0.285525151 | 0.455148865 |
| ENSG00000248079 | 12.54317328 | -1.078062438 | 0.515470051 | -2.091416243 | 0.036490767 | 0.094660353 |
| ENSG00000248092 | 110.5784312 | -0.073815784 | 0.170362261 | -0.433287183 | 0.664806148 | 0.785659558 |
| ENSG00000248098 | 30.09651128 | 0.480795647  | 0.318175426 | 1.51110239   | 0.130762366 | 0.257830759 |
| ENSG00000248099 | 16.97718267 | -0.791778345 | 0.437660196 | -1.809116645 | 0.070432884 | 0.159807901 |
| ENSG00000248103 | 72.6527376  | 0.016426005  | 0.213488559 | 0.076940914  | 0.938670549 | 0.966112632 |
| ENSG00000248206 | 16.74571462 | 0.577943131  | 0.425668409 | 1.357730852  | 0.174549103 | 0.318924461 |
| ENSG00000248238 | 20.49683466 | 0.529656472  | 0.391766432 | 1.351970023  | 0.176384905 | 0.321359113 |
| ENSG00000248275 | 47.58594274 | -0.197527087 | 0.256840083 | -0.769066437 | 0.441853871 | 0.607014311 |
| ENSG00000248283 | 8.451280415 | -0.431197426 | 0.604361088 | -0.713476488 | 0.475550957 | 0.636560348 |
| ENSG00000248329 | 29.87459978 | -7.212563153 | 1.206409783 | -5.978535033 | 2.25E-09    | 3.01E-08    |

|                 |             |              |             |              |             |             |
|-----------------|-------------|--------------|-------------|--------------|-------------|-------------|
| ENSG00000248333 | 326.5764694 | 0.204024981  | 0.114746273 | 1.778053223  | 0.075395114 | 0.168187259 |
| ENSG00000248370 | 55.24317826 | -0.08117095  | 0.247774116 | -0.327600605 | 0.743213664 | 0.842922019 |
| ENSG00000248383 | 18.93974595 | -0.91869574  | 0.424806615 | -2.162621081 | 0.030570335 | 0.081794572 |
| ENSG00000248429 | 43.84688718 | 2.22019848   | 0.304346959 | 7.294958644  | 2.99E-13    | 6.25E-12    |
| ENSG00000248449 | 13.30502061 | 0.292191132  | 0.468952288 | 0.623072196  | 0.53323708  | 0.684615781 |
| ENSG00000248483 | 59.33135761 | -0.230371686 | 0.226705234 | -1.016172772 | 0.30954712  | 0.480836934 |
| ENSG00000248487 | 231.1224822 | 0.692428722  | 0.129844013 | 5.33277359   | 9.67E-08    | 1.02E-06    |
| ENSG00000248489 | 20.73065987 | -0.280351656 | 0.401397924 | -0.698438231 | 0.484903174 | 0.645388942 |
| ENSG00000248508 | 15.33728766 | -0.712815622 | 0.453089476 | -1.573233677 | 0.11566472  | 0.23461983  |
| ENSG00000248515 | 30.73128099 | -0.20616789  | 0.357582124 | -0.576560952 | 0.564236084 | 0.710326606 |
| ENSG00000248521 | 9.148412376 | -0.8674271   | 0.579821975 | -1.496023153 | 0.134647622 | 0.26335215  |
| ENSG00000248527 | 29415.34893 | -0.300433454 | 0.073903065 | -4.065236731 | 4.80E-05    | 0.000296928 |
| ENSG00000248538 | 32.71002423 | -1.232320391 | 0.326737264 | -3.771594269 | 0.000162208 | 0.000886934 |
| ENSG00000248605 | 13.32251721 | 7.31083652   | 1.253261498 | 5.833448591  | 5.43E-09    | 6.91E-08    |
| ENSG00000248641 | 10.21647352 | 0.010475259  | 0.537260711 | 0.019497535  | 0.984444204 | 0.992000554 |
| ENSG00000248643 | 10.67873781 | 0.518960973  | 0.525919413 | 0.986769     | 0.323755895 | 0.495510902 |
| ENSG00000248746 | 175.6646959 | -2.543236612 | 0.170301686 | -14.93371368 | 1.99E-50    | 2.12E-48    |
| ENSG00000248796 | 15.10180605 | 0.677766449  | 0.462462625 | 1.465559405  | 0.142768357 | 0.274909817 |
| ENSG00000248837 | 42.9362682  | 2.811205804  | 0.336678441 | 8.349824232  | 6.84E-17    | 1.87E-15    |
| ENSG00000248866 | 9.47370194  | -0.424073834 | 0.556287355 | -0.762328731 | 0.44586383  | 0.610790835 |
| ENSG00000248869 | 18.5202597  | 1.885429112  | 0.438961908 | 4.295199831  | 1.75E-05    | 0.000118784 |
| ENSG00000248923 | 301.80732   | -0.491228544 | 0.13057019  | -3.762179904 | 0.000168439 | 0.000916722 |
| ENSG00000248932 | 38.33458593 | -1.392046823 | 0.306939521 | -4.53524792  | 5.75E-06    | 4.36E-05    |
| ENSG00000248971 | 20.53195397 | -0.192225431 | 0.377549392 | -0.509139823 | 0.61065422  | 0.746810014 |
| ENSG00000249042 | 35.66833429 | -0.317712029 | 0.293562602 | -1.082263297 | 0.27913555  | 0.447809167 |
| ENSG00000249087 | 24.79883235 | -0.234338633 | 0.352766522 | -0.664288186 | 0.506505881 | 0.663949991 |
| ENSG00000249115 | 154.1260912 | -0.187943264 | 0.146935841 | -1.279083865 | 0.200867525 | 0.353228107 |
| ENSG00000249119 | 87.41182945 | 0.42074071   | 0.204965354 | 2.052740633  | 0.040097739 | 0.10198315  |
| ENSG00000249158 | 18.09090785 | -0.241836319 | 0.425143803 | -0.568834163 | 0.569468688 | 0.714810407 |
| ENSG00000249242 | 16.09955125 | -0.886784002 | 0.441805042 | -2.007183977 | 0.044730077 | 0.111701937 |
| ENSG00000249258 | 15.9395653  | -0.525616936 | 0.431018821 | -1.219475604 | 0.22266373  | 0.380876451 |
| ENSG00000249264 | 16.25627198 | -0.473845377 | 0.445387788 | -1.063893961 | 0.287376739 | 0.457321973 |
| ENSG00000249348 | 17.08599428 | -0.286077914 | 0.433608507 | -0.659760842 | 0.509407316 | 0.665836024 |
| ENSG00000249353 | 34.99505823 | -0.3721387   | 0.294411675 | -1.264007959 | 0.20622717  | 0.359725948 |
| ENSG00000249378 | 42.69670539 | -0.889803345 | 0.272265185 | -3.268149562 | 0.001082531 | 0.00482064  |
| ENSG00000249464 | 18.06921527 | -4.634395414 | 0.812980993 | -5.700496635 | 1.19E-08    | 1.45E-07    |
| ENSG00000249471 | 43.42077237 | 0.354807928  | 0.276275629 | 1.284253442  | 0.199053291 | 0.350872328 |
| ENSG00000249476 | 31.53162429 | 0.013065394  | 0.319678176 | 0.040870459  | 0.967399168 | 0.982880628 |
| ENSG00000249513 | 10.15201846 | 1.063628227  | 0.562293788 | 1.891588081  | 0.058545885 | 0.13793929  |
| ENSG00000249550 | 57.86614738 | -2.36300534  | 0.277631447 | -8.511302899 | 1.72E-17    | 4.94E-16    |
| ENSG00000249565 | 19.30711527 | 0.039293887  | 0.404625821 | 0.097111664  | 0.922637718 | 0.957326934 |
| ENSG00000249572 | 9.762829655 | -0.1933348   | 0.549685301 | -0.351719064 | 0.725048962 | 0.829715908 |
| ENSG00000249592 | 100.93984   | 0.233642875  | 0.181254269 | 1.289033778  | 0.197386344 | 0.348853293 |
| ENSG00000249661 | 20.24024735 | -0.140986941 | 0.398965824 | -0.353380999 | 0.723802829 | 0.82889763  |
| ENSG00000249669 | 6.481372167 | -2.350155819 | 0.817481475 | -2.874873488 | 0.004041894 | 0.014941181 |
| ENSG00000249673 | 86.26479377 | -0.141058742 | 0.193732397 | -0.72811127  | 0.466545475 | 0.628880558 |
| ENSG00000249776 | 22.01039337 | -1.16068656  | 0.387117733 | -2.998277944 | 0.002715099 | 0.010588284 |
| ENSG00000249780 | 27.08390298 | -0.700729258 | 0.344628915 | -2.033286317 | 0.042023605 | 0.106476475 |
| ENSG00000249803 | 10.29557741 | 6.957149242  | 1.267010354 | 5.49099636   | 4.00E-08    | 4.50E-07    |
| ENSG00000249850 | 24.18715188 | -0.322228705 | 0.360789984 | -0.893119873 | 0.371792982 | 0.542492574 |

|                 |             |              |             |              |             |             |
|-----------------|-------------|--------------|-------------|--------------|-------------|-------------|
| ENSG00000249855 | 17.12056865 | 0.195709812  | 0.41062455  | 0.476614982  | 0.633636313 | 0.763121272 |
| ENSG00000249859 | 852.1739206 | -0.093165064 | 0.100378635 | -0.928136395 | 0.353336823 | 0.52460864  |
| ENSG00000249863 | 11.49018073 | -0.506649388 | 0.510977023 | -0.991530667 | 0.321426525 | 0.493181693 |
| ENSG00000249898 | 13.43394345 | -1.521586126 | 0.509743096 | -2.985005858 | 0.002835729 | 0.011003725 |
| ENSG00000249915 | 41.29449676 | -0.58157906  | 0.280697261 | -2.071908565 | 0.038273969 | 0.0982925   |
| ENSG00000249936 | 8.876792616 | 0.28224877   | 0.572049078 | 0.493399571  | 0.621730285 | 0.754639706 |
| ENSG00000249984 | 73.27629872 | -4.455486756 | 0.380534201 | -11.70850541 | 1.15E-31    | 6.61E-30    |
| ENSG00000249992 | 171.7337898 | 0.11396937   | 0.142996477 | 0.797008239  | 0.425446247 | 0.592704892 |
| ENSG00000250033 | 8.521672763 | -3.446213957 | 0.877216874 | -3.928576913 | 8.55E-05    | 0.000500758 |
| ENSG00000250049 | 11.48326951 | -4.888639155 | 1.082119349 | -4.517652475 | 6.25E-06    | 4.69E-05    |
| ENSG00000250067 | 62.54035195 | 0.149719547  | 0.234209517 | 0.639254751  | 0.522657219 | 0.67653575  |
| ENSG00000250069 | 13.1555327  | -0.388028151 | 0.4968943   | -0.780906826 | 0.434857297 | 0.601106126 |
| ENSG00000250091 | 99.68622907 | 0.107987555  | 0.17556493  | 0.615086139  | 0.538497835 | 0.689165369 |
| ENSG00000250130 | 10.66123594 | -0.371920773 | 0.553674495 | -0.671731813 | 0.501754445 | 0.660124069 |
| ENSG00000250131 | 11.64266764 | -1.959070663 | 0.583378495 | -3.358146865 | 0.000784669 | 0.003613851 |
| ENSG00000250132 | 10.76295766 | 0.93244243   | 0.531087143 | 1.755723976  | 0.079135551 | 0.174947605 |
| ENSG00000250133 | 52.86630526 | -1.08382417  | 0.263093601 | -4.11953832  | 3.80E-05    | 0.000239887 |
| ENSG00000250159 | 32.49231849 | -0.290026212 | 0.306483318 | -0.946303419 | 0.34399385  | 0.515807175 |
| ENSG00000250182 | 33.68446369 | 0.410302824  | 0.299768488 | 1.368732339  | 0.171082958 | 0.314061985 |
| ENSG00000250241 | 132.9421996 | 1.036739847  | 0.161111005 | 6.434941211  | 1.24E-10    | 1.93E-09    |
| ENSG00000250251 | 13.93862332 | 0.44380935   | 0.463465402 | 0.957588957  | 0.33827007  | 0.510265437 |
| ENSG00000250280 | 123.2171958 | -2.262911296 | 0.202295769 | -11.18615236 | 4.77E-29    | 2.47E-27    |
| ENSG00000250317 | 96.10055188 | -0.200681175 | 0.182583513 | -1.099119915 | 0.271715764 | 0.439469354 |
| ENSG00000250332 | 12.06520979 | -0.196524209 | 0.499860289 | -0.393158276 | 0.694202584 | 0.807842242 |
| ENSG00000250337 | 326.8846073 | -0.535375994 | 0.111805943 | -4.788439486 | 1.68E-06    | 1.42E-05    |
| ENSG00000250479 | 1712.839138 | 0.38036013   | 0.066956422 | 5.680711721  | 1.34E-08    | 1.62E-07    |
| ENSG00000250508 | 27.09596841 | 1.057452183  | 0.340059454 | 3.10960972   | 0.001873347 | 0.007739678 |
| ENSG00000250510 | 57.301281   | 0.685241651  | 0.238018249 | 2.878945847  | 0.003990068 | 0.014779876 |
| ENSG00000250539 | 24.80083327 | -0.701758281 | 0.368368122 | -1.905046171 | 0.05677407  | 0.134740606 |
| ENSG00000250565 | 175.2842094 | -0.223572613 | 0.146387713 | -1.527263512 | 0.126695499 | 0.251884299 |
| ENSG00000250568 | 16.58032859 | 0.464471056  | 0.422839672 | 1.098456666  | 0.27200513  | 0.439734844 |
| ENSG00000250571 | 81.27317636 | -0.156757704 | 0.196726703 | -0.796829827 | 0.42554987  | 0.592790462 |
| ENSG00000250722 | 322.9525605 | 1.051755907  | 0.11995523  | 8.767903701  | 1.82E-18    | 5.71E-17    |
| ENSG00000250742 | 38.64649156 | 0.934383435  | 0.291236165 | 3.208335872  | 0.001335055 | 0.005773866 |
| ENSG00000250802 | 90.92782023 | -0.620301078 | 0.194106138 | -3.195679878 | 0.001395018 | 0.00600362  |
| ENSG00000250838 | 10.17984166 | 0.396232329  | 0.537595326 | 0.73704571   | 0.461094552 | 0.624460697 |
| ENSG00000250899 | 60.00884668 | -0.182512267 | 0.229433378 | -0.795491346 | 0.426327743 | 0.593579721 |
| ENSG00000250903 | 69.50775359 | -0.922489482 | 0.223448727 | -4.128416818 | 3.65E-05    | 0.000231645 |
| ENSG00000250938 | 7.491577647 | -2.540276085 | 0.783976259 | -3.240246187 | 0.001194265 | 0.005235907 |
| ENSG00000250982 | 27.27404649 | 0.34048965   | 0.341548833 | 0.996898882  | 0.318813594 | 0.490350877 |
| ENSG00000250988 | 13.73401868 | 0.226821226  | 0.482595485 | 0.470002792  | 0.638353022 | 0.766295498 |
| ENSG00000251022 | 126.7639116 | -0.261873517 | 0.164525879 | -1.591685866 | 0.111455306 | 0.228256696 |
| ENSG00000251023 | 16.35269617 | -0.525757935 | 0.432265086 | -1.216285914 | 0.223876026 | 0.382164648 |
| ENSG00000251033 | 25.94630292 | 2.199356892  | 0.395530352 | 5.560526213  | 2.69E-08    | 3.10E-07    |
| ENSG00000251095 | 442.5851267 | -4.108304296 | 0.1511904   | -27.17305002 | 1.35E-162   | 7.92E-160   |
| ENSG00000251127 | 26.68252928 | 0.58671978   | 0.341979385 | 1.715658328  | 0.086224596 | 0.187143263 |
| ENSG00000251129 | 216.3488094 | 1.753349633  | 0.138733764 | 12.63823296  | 1.30E-36    | 8.90E-35    |
| ENSG00000251136 | 124.5886079 | -0.494349814 | 0.170375272 | -2.901534993 | 0.003713393 | 0.013858138 |
| ENSG00000251141 | 321.0671589 | -4.611126221 | 0.195462253 | -23.59087835 | 4.78E-123   | 1.64E-120   |
| ENSG00000251143 | 9.01184518  | 0.610335264  | 0.575584315 | 1.060375079  | 0.288973995 | 0.459187524 |

|                 |             |              |             |              |             |             |
|-----------------|-------------|--------------|-------------|--------------|-------------|-------------|
| ENSG00000251151 | 33.17511775 | -0.40349576  | 0.303480592 | -1.32956034  | 0.183663173 | 0.330989821 |
| ENSG00000251161 | 10.6349964  | -0.054829407 | 0.538100471 | -0.101894368 | 0.91884052  | 0.955433621 |
| ENSG00000251192 | 23.62323381 | -0.487625079 | 0.426715258 | -1.142741138 | 0.253146084 | 0.417903755 |
| ENSG00000251199 | 6.938179464 | -1.355619525 | 0.692969591 | -1.95624677  | 0.050436091 | 0.122682436 |
| ENSG00000251244 | 12.68361975 | -2.462757954 | 0.584839013 | -4.211001491 | 2.54E-05    | 0.000167354 |
| ENSG00000251279 | 15.67514911 | -0.103651789 | 0.443545308 | -0.233689291 | 0.815226202 | 0.891560379 |
| ENSG00000251322 | 235.3610815 | -0.2614926   | 0.123772945 | -2.112679792 | 0.034628184 | 0.090632029 |
| ENSG00000251340 | 9.612370256 | -0.156663874 | 0.553150304 | -0.283221166 | 0.777007304 | 0.866308565 |
| ENSG00000251348 | 20.8287314  | -0.94465217  | 0.388948445 | -2.428733632 | 0.01515166  | 0.045916146 |
| ENSG00000251364 | 19.56657386 | -1.087268936 | 0.424880817 | -2.558997474 | 0.01049745  | 0.033579485 |
| ENSG00000251369 | 98.67019367 | 0.594990774  | 0.1782113   | 3.338681525  | 0.00084177  | 0.003851578 |
| ENSG00000251381 | 354.9776486 | 0.190461214  | 0.102873818 | 1.8514061    | 0.064111152 | 0.148510778 |
| ENSG00000251429 | 8.912991732 | 0.76039665   | 0.605148907 | 1.256544697  | 0.208918551 | 0.363485066 |
| ENSG00000251432 | 27.69024603 | -0.313827297 | 0.336298538 | -0.933180676 | 0.35072669  | 0.522500564 |
| ENSG00000251485 | 20.75874491 | -0.198182792 | 0.399350466 | -0.496262828 | 0.619708989 | 0.753097341 |
| ENSG00000251493 | 52.07392563 | 5.099406524  | 0.498623541 | 10.22696706  | 1.50E-24    | 6.45E-23    |
| ENSG00000251550 | 9.473636857 | -0.639011563 | 0.570465702 | -1.120157724 | 0.262646556 | 0.429049444 |
| ENSG00000251562 | 208519.967  | 0.10525716   | 0.069601717 | 1.512278218  | 0.1304631   | 0.257353625 |
| ENSG00000251573 | 12.39042639 | -0.015337355 | 0.497970885 | -0.030799703 | 0.975429277 | 0.987592263 |
| ENSG00000251580 | 12.34191646 | -1.179943599 | 0.531087397 | -2.221750331 | 0.026300183 | 0.072353833 |
| ENSG00000251602 | 37.07964348 | -0.263717378 | 0.298174877 | -0.884438627 | 0.376459479 | 0.54623761  |
| ENSG00000251615 | 32.04188677 | -0.194151964 | 0.302569952 | -0.641676289 | 0.521083388 | 0.675369842 |
| ENSG00000251667 | 10.29951101 | -0.839440276 | 0.55985016  | -1.49940169  | 0.133769455 | 0.262218747 |
| ENSG00000251733 | 18.27195599 | -0.590896688 | 0.422441301 | -1.398766377 | 0.161883052 | 0.301587696 |
| ENSG00000251791 | 13.56669851 | -0.15353932  | 0.467090716 | -0.328714134 | 0.74237177  | 0.842538277 |
| ENSG00000251972 | 9.609455075 | 0.096104761  | 0.556558194 | 0.172676931  | 0.862905378 | 0.922223828 |
| ENSG00000252010 | 164.3318623 | -0.35584126  | 0.151441892 | -2.349688428 | 0.018789131 | 0.054848489 |
| ENSG00000252213 | 50.6285101  | 0.436084872  | 0.246824013 | 1.766784626  | 0.077264304 | 0.171681177 |
| ENSG00000252498 | 12.71099061 | -0.693853109 | 0.506898623 | -1.368820268 | 0.171055464 | 0.314052555 |
| ENSG00000252577 | 14.90354271 | -1.690870105 | 0.499619117 | -3.384318265 | 0.000713552 | 0.003327779 |
| ENSG00000252690 | 11.33384151 | -1.226074246 | 0.559679794 | -2.190670912 | 0.028475615 | 0.077189689 |
| ENSG00000252835 | 196.0307013 | -0.193446802 | 0.137951193 | -1.40228437  | 0.160830346 | 0.300104127 |
| ENSG00000252947 | 30.5249575  | -1.496050785 | 0.35413712  | -4.224495827 | 2.39E-05    | 0.000158302 |
| ENSG00000253159 | 34.83772607 | -0.576829094 | 0.332583482 | -1.734388885 | 0.082849106 | 0.181472227 |
| ENSG00000253178 | 11.99560771 | -0.588857722 | 0.510322258 | -1.153893864 | 0.248543685 | 0.412749377 |
| ENSG00000253187 | 58.9360073  | -1.147056726 | 0.245629226 | -4.669870697 | 3.01E-06    | 2.42E-05    |
| ENSG00000253200 | 25.10628423 | -0.255925014 | 0.343477975 | -0.745098764 | 0.456212017 | 0.61991199  |
| ENSG00000253210 | 18.31034126 | -0.539196218 | 0.407677842 | -1.322603689 | 0.185967207 | 0.334008612 |
| ENSG00000253213 | 12.81082378 | -0.072201498 | 0.487185606 | -0.148201213 | 0.882183974 | 0.935107024 |
| ENSG00000253218 | 15.01397299 | -0.22569139  | 0.461440326 | -0.489102009 | 0.624769479 | 0.756367911 |
| ENSG00000253276 | 45.41505919 | -0.14498439  | 0.263090978 | -0.551080814 | 0.581578277 | 0.723904157 |
| ENSG00000253284 | 140.4416728 | -0.253517893 | 0.173432963 | -1.461763022 | 0.14380616  | 0.276264378 |
| ENSG00000253293 | 254.4090377 | -1.508904977 | 0.128488835 | -11.74347153 | 7.63E-32    | 4.41E-30    |
| ENSG00000253304 | 12.27158679 | -3.203264544 | 0.694350188 | -4.613327107 | 3.96E-06    | 3.10E-05    |
| ENSG00000253305 | 46.33747522 | -0.227172571 | 0.265499786 | -0.855641259 | 0.392196241 | 0.560529343 |
| ENSG00000253308 | 5.582676515 | -5.762497859 | 1.318709961 | -4.369799295 | 1.24E-05    | 8.73E-05    |
| ENSG00000253320 | 11.36082283 | -1.236541886 | 0.542704941 | -2.278479136 | 0.022698046 | 0.06393412  |
| ENSG00000253341 | 21.43933851 | -0.136451375 | 0.36992945  | -0.368857831 | 0.712233696 | 0.820165336 |
| ENSG00000253352 | 788.2990028 | -0.266312042 | 0.084009264 | -3.170031842 | 0.001524222 | 0.006474373 |
| ENSG00000253368 | 24.78529478 | -0.549593168 | 0.352055747 | -1.561096992 | 0.118500868 | 0.239370389 |

|                 |             |              |             |              |             |             |
|-----------------|-------------|--------------|-------------|--------------|-------------|-------------|
| ENSG00000253405 | 7.221312847 | -6.132566806 | 1.289537313 | -4.755633471 | 1.98E-06    | 1.65E-05    |
| ENSG00000253438 | 48.7834488  | 4.307537337  | 0.419977105 | 10.25660038  | 1.11E-24    | 4.82E-23    |
| ENSG00000253485 | 18.64118203 | 0.410149577  | 0.400051939 | 1.025240815  | 0.305249574 | 0.476215101 |
| ENSG00000253508 | 20.78474231 | -2.560093897 | 0.483762697 | -5.292044871 | 1.21E-07    | 1.26E-06    |
| ENSG00000253537 | 15.46556938 | -0.239996754 | 0.438235098 | -0.547643845 | 0.583936477 | 0.725954128 |
| ENSG00000253598 | 9.477931253 | -0.202206095 | 0.557316154 | -0.362821163 | 0.716738481 | 0.823627736 |
| ENSG00000253626 | 21.51679575 | 1.886147128  | 0.418504811 | 4.50687084   | 6.58E-06    | 4.90E-05    |
| ENSG00000253636 | 24.18067011 | -0.846647055 | 0.361715588 | -2.340642991 | 0.019250565 | 0.055967852 |
| ENSG00000253649 | 307.2358172 | 0.215000128  | 0.110646017 | 1.943134828  | 0.05199987  | 0.125743187 |
| ENSG00000253669 | 77.92373942 | -1.023019696 | 0.206396126 | -4.956583802 | 7.17E-07    | 6.55E-06    |
| ENSG00000253671 | 9.72111811  | -2.165402908 | 0.645894526 | -3.352564268 | 0.000800666 | 0.003679085 |
| ENSG00000253683 | 9.311662064 | 0.327681239  | 0.575677557 | 0.569209683  | 0.56921385  | 0.714607825 |
| ENSG00000253710 | 94.46067598 | -0.194758101 | 0.188200755 | -1.034842295 | 0.300742567 | 0.471067221 |
| ENSG00000253716 | 61.38552081 | 0.369854917  | 0.224837197 | 1.644989892  | 0.099971896 | 0.209660379 |
| ENSG00000253719 | 287.1052124 | -0.365643223 | 0.113456405 | -3.222764064 | 0.001269601 | 0.005524809 |
| ENSG00000253729 | 6503.72068  | -0.080004944 | 0.057136358 | -1.400245775 | 0.161439733 | 0.30096137  |
| ENSG00000253731 | 17.99461795 | 0.517241991  | 0.413754815 | 1.250117151  | 0.211256755 | 0.366298879 |
| ENSG00000253738 | 371.0205048 | -0.192360246 | 0.11934633  | -1.61178183  | 0.107009423 | 0.221248362 |
| ENSG00000253741 | 44.19546304 | -0.596422574 | 0.273282116 | -2.182442758 | 0.029076872 | 0.078531593 |
| ENSG00000253767 | 10.9696078  | -0.314296044 | 0.556441731 | -0.564831906 | 0.572188103 | 0.717316045 |
| ENSG00000253846 | 32.24727045 | -0.250988311 | 0.306513925 | -0.81884799  | 0.412873147 | 0.581183394 |
| ENSG00000253873 | 25.9125714  | 0.139755834  | 0.347334769 | 0.402366379  | 0.687414409 | 0.802917762 |
| ENSG00000253910 | 22.28810196 | -0.50038281  | 0.370501852 | -1.350554138 | 0.1768383   | 0.32193463  |
| ENSG00000253948 | 23.17702101 | -0.140697145 | 0.358975918 | -0.391940346 | 0.695102291 | 0.808554313 |
| ENSG00000253982 | 19.86929475 | 0.813230943  | 0.420028267 | 1.936133843  | 0.052851311 | 0.127319904 |
| ENSG00000254004 | 120.7810559 | -0.0934018   | 0.163322812 | -0.571884594 | 0.567400162 | 0.71284054  |
| ENSG00000254087 | 329.3604236 | 0.058063354  | 0.1091436   | 0.531990461  | 0.594732602 | 0.734702534 |
| ENSG00000254093 | 82.28738995 | 0.291364866  | 0.195793076 | 1.488126507  | 0.136717534 | 0.266288298 |
| ENSG00000254115 | 13.52211683 | -7.038586962 | 1.239915699 | -5.676665736 | 1.37E-08    | 1.65E-07    |
| ENSG00000254119 | 13.874296   | 1.606738663  | 0.49887491  | 3.220724534  | 0.00127867  | 0.005559713 |
| ENSG00000254122 | 102.6728124 | 0.11674168   | 0.174411386 | 0.66934667   | 0.503274362 | 0.661009347 |
| ENSG00000254165 | 25.62419161 | 0.06088151   | 0.360352876 | 0.168949699  | 0.865836207 | 0.924545891 |
| ENSG00000254206 | 40.04031076 | 0.175441201  | 0.287348312 | 0.610552398  | 0.541495945 | 0.691142874 |
| ENSG00000254221 | 26.5955747  | 0.51738058   | 0.354560266 | 1.459217599  | 0.144505226 | 0.277379737 |
| ENSG00000254319 | 7.191201994 | -6.128137353 | 1.292131703 | -4.742656912 | 2.11E-06    | 1.75E-05    |
| ENSG00000254346 | 9.054989997 | -2.900726971 | 0.777486687 | -3.730902431 | 0.000190795 | 0.001025015 |
| ENSG00000254363 | 7.389116786 | -1.026631532 | 0.648518413 | -1.583041454 | 0.113412016 | 0.231353266 |
| ENSG00000254389 | 19.59412406 | -0.078513224 | 0.391618812 | -0.20048379  | 0.841102235 | 0.907697202 |
| ENSG00000254394 | 224.2223031 | 0.190600753  | 0.149525278 | 1.274705895  | 0.202413359 | 0.3550575   |
| ENSG00000254402 | 34.78667777 | 0.749533429  | 0.324135179 | 2.312409998  | 0.0207551   | 0.059560141 |
| ENSG00000254469 | 23.84204327 | -0.091602652 | 0.369419477 | -0.247963786 | 0.804162426 | 0.88388651  |
| ENSG00000254470 | 286.0571607 | 0.070924321  | 0.116839561 | 0.607023166  | 0.543835538 | 0.692768678 |
| ENSG00000254505 | 22.3086824  | 0.159916094  | 0.366912735 | 0.43584231   | 0.662951144 | 0.784604829 |
| ENSG00000254535 | 147.9300222 | -0.928180365 | 0.157165513 | -5.905750874 | 3.51E-09    | 4.54E-08    |
| ENSG00000254602 | 34.4090884  | -1.118245375 | 0.345206684 | -3.239350302 | 0.001198023 | 0.005250744 |
| ENSG00000254612 | 11.49224054 | 0.646312192  | 0.510002409 | 1.267272823  | 0.205057754 | 0.358576656 |
| ENSG00000254635 | 106.2898899 | -0.572210093 | 0.183752666 | -3.114023354 | 0.001845549 | 0.007640561 |
| ENSG00000254665 | 21.64192537 | -0.353096519 | 0.386603225 | -0.913330505 | 0.361068743 | 0.532125413 |
| ENSG00000254682 | 18.18775815 | 0.174896752  | 0.423540788 | 0.412939573  | 0.679650886 | 0.796783175 |
| ENSG00000254685 | 13.71648141 | -0.289796173 | 0.478710942 | -0.605367765 | 0.544934665 | 0.693611565 |

|                 |             |              |             |              |             |             |
|-----------------|-------------|--------------|-------------|--------------|-------------|-------------|
| ENSG00000254712 | 13.56660796 | -0.887396531 | 0.48664106  | -1.823513476 | 0.068225658 | 0.155958636 |
| ENSG00000254726 | 348.5416415 | -0.158049745 | 0.112028147 | -1.410803877 | 0.158302451 | 0.296569022 |
| ENSG00000254791 | 8.726260452 | 0.294354091  | 0.573080883 | 0.513634463  | 0.60750758  | 0.744127919 |
| ENSG00000254815 | 19.02270457 | -0.418611279 | 0.396271877 | -1.056373926 | 0.290797413 | 0.461146    |
| ENSG00000254819 | 8.985406823 | 0.163520348  | 0.572502832 | 0.285623649  | 0.775166388 | 0.865324687 |
| ENSG00000254837 | 14.48029317 | -0.488917109 | 0.458779896 | -1.065689916 | 0.286563837 | 0.456390275 |
| ENSG00000254858 | 106.7020249 | -0.127234775 | 0.181015233 | -0.702895403 | 0.482120936 | 0.642721153 |
| ENSG00000254860 | 16.67279654 | 0.572943341  | 0.444383441 | 1.289299485  | 0.19729399  | 0.348733947 |
| ENSG00000254901 | 74.78026195 | -0.608243802 | 0.206523784 | -2.945151354 | 0.003227967 | 0.012288145 |
| ENSG00000254936 | 38.32225009 | -0.692653869 | 0.28836522  | -2.402002116 | 0.016305614 | 0.048868138 |
| ENSG00000254986 | 311.5494638 | -0.213642321 | 0.108100188 | -1.976336254 | 0.048116706 | 0.118411943 |
| ENSG00000254996 | 22.42103009 | -0.187695027 | 0.38155281  | -0.491924111 | 0.622772993 | 0.755134766 |
| ENSG00000254999 | 301.2620216 | -0.007550688 | 0.12799679  | -0.058991232 | 0.952959092 | 0.974251555 |
| ENSG00000255046 | 10.60837692 | -0.332113123 | 0.530573728 | -0.62595094  | 0.531347121 | 0.683156819 |
| ENSG00000255052 | 8.27085157  | -1.465171489 | 0.638436331 | -2.294937518 | 0.021736705 | 0.061783792 |
| ENSG00000255062 | 12.93651837 | -0.511328383 | 0.521437158 | -0.980613627 | 0.326783312 | 0.498977615 |
| ENSG00000255112 | 175.4942734 | -0.224713617 | 0.138760334 | -1.619436986 | 0.105353274 | 0.218402811 |
| ENSG00000255121 | 36.9669672  | -0.371978434 | 0.30593373  | -1.215879119 | 0.224030974 | 0.38233059  |
| ENSG00000255135 | 24.8336017  | -0.07092491  | 0.360818059 | -0.196566964 | 0.844166425 | 0.90976923  |
| ENSG00000255150 | 22.26057608 | 0.401844696  | 0.367311135 | 1.094017191  | 0.273947439 | 0.442213246 |
| ENSG00000255182 | 23.57425126 | 0.202431966  | 0.368899798 | 0.548745127  | 0.583180373 | 0.725270889 |
| ENSG00000255198 | 85.17433747 | 0.300404133  | 0.194062751 | 1.547974207  | 0.121628507 | 0.244492793 |
| ENSG00000255284 | 33.34921821 | -0.25555093  | 0.298260819 | -0.856803554 | 0.391553461 | 0.559925834 |
| ENSG00000255302 | 657.9009419 | -0.100711254 | 0.088811243 | -1.133992172 | 0.256797832 | 0.422535821 |
| ENSG00000255310 | 28.05407727 | -0.733474708 | 0.337070451 | -2.176027908 | 0.029553174 | 0.079527478 |
| ENSG00000255374 | 14.16674345 | -0.4089968   | 0.481956874 | -0.848617006 | 0.396094441 | 0.563893646 |
| ENSG00000255423 | 33.95849331 | -0.181312547 | 0.31103514  | -0.582932678 | 0.559938621 | 0.706626342 |
| ENSG00000255491 | 8.967867791 | -1.389672424 | 0.640350384 | -2.170175046 | 0.029993588 | 0.080435267 |
| ENSG00000255517 | 15.20974564 | 0.047771701  | 0.441659552 | 0.108164085  | 0.913865534 | 0.953578158 |
| ENSG00000255529 | 51.3759679  | 0.190593201  | 0.251161421 | 0.758847439  | 0.447943824 | 0.613042371 |
| ENSG00000255561 | 9.462574141 | 0.763807883  | 0.572816852 | 1.333424254  | 0.182392617 | 0.329357128 |
| ENSG00000255571 | 36.96440654 | 0.443460909  | 0.288720574 | 1.535951883  | 0.124550182 | 0.248799261 |
| ENSG00000255642 | 20.07371662 | -0.280936976 | 0.394737434 | -0.71170594  | 0.476646889 | 0.63753861  |
| ENSG00000255710 | 11.77642257 | -0.564782507 | 0.513825812 | -1.099171146 | 0.271693422 | 0.439469354 |
| ENSG00000255717 | 505.7275502 | 0.328076805  | 0.093209092 | 3.51979402   | 0.000431882 | 0.00212492  |
| ENSG00000255837 | 12.69265324 | 0.061252071  | 0.489461318 | 0.125141801  | 0.900411291 | 0.946145827 |
| ENSG00000255856 | 15.95881975 | -0.645763401 | 0.434479227 | -1.486292924 | 0.137201658 | 0.266871768 |
| ENSG00000255857 | 63.53571649 | 0.321623595  | 0.217816284 | 1.476581956  | 0.139787731 | 0.27068438  |
| ENSG00000255946 | 12.91894588 | -1.315830762 | 0.548770387 | -2.397780188 | 0.01649476  | 0.049319263 |
| ENSG00000255960 | 17.11919982 | 1.12075089   | 0.448117438 | 2.501020478  | 0.012383602 | 0.038690492 |
| ENSG00000256043 | 99.04814222 | -1.785911707 | 0.205691627 | -8.682471586 | 3.87E-18    | 1.17E-16    |
| ENSG00000256053 | 51.04900132 | -0.025181966 | 0.245892993 | -0.102410264 | 0.918431037 | 0.955355281 |
| ENSG00000256073 | 8.816928637 | 0.282165505  | 0.600080785 | 0.470212532  | 0.638203181 | 0.766295498 |
| ENSG00000256092 | 9.850765353 | 0.407782958  | 0.559693396 | 0.728582759  | 0.466256928 | 0.628880558 |
| ENSG00000256139 | 15.69222573 | -0.484435587 | 0.461085775 | -1.050640928 | 0.293423536 | 0.463987641 |
| ENSG00000256188 | 17.25052617 | -0.576881815 | 0.42044803  | -1.372064496 | 0.170043361 | 0.313012592 |
| ENSG00000256223 | 29.77996933 | -0.042978147 | 0.317632692 | -0.135307693 | 0.892368603 | 0.941285707 |
| ENSG00000256235 | 79.92461621 | -0.222589668 | 0.203039438 | -1.096287844 | 0.272952827 | 0.440962434 |
| ENSG00000256238 | 16.11043371 | -0.381509073 | 0.443162176 | -0.86087914  | 0.389304612 | 0.557731961 |
| ENSG00000256269 | 125.915176  | -0.148350126 | 0.167773846 | -0.884226766 | 0.376573812 | 0.546267833 |

|                 |             |              |             |              |             |             |
|-----------------|-------------|--------------|-------------|--------------|-------------|-------------|
| ENSG00000256294 | 25.29518368 | 0.390585612  | 0.341538165 | 1.143607512  | 0.252786445 | 0.417437186 |
| ENSG00000256341 | 11.33549604 | 0.111465186  | 0.511066247 | 0.218103205  | 0.827348701 | 0.898686295 |
| ENSG00000256436 | 9.287413228 | -0.287518143 | 0.56360699  | -0.51013942  | 0.60995379  | 0.74621328  |
| ENSG00000256525 | 226.8940131 | 0.021145637  | 0.128182243 | 0.164965414  | 0.868971205 | 0.926977409 |
| ENSG00000256537 | 179.5285946 | -0.033461174 | 0.143316396 | -0.233477638 | 0.815390532 | 0.891608898 |
| ENSG00000256591 | 12.55208476 | -0.570447229 | 0.498229189 | -1.144949437 | 0.252230104 | 0.416881547 |
| ENSG00000256616 | 14.32914404 | 1.498397517  | 0.479804392 | 3.122934144  | 0.001790578 | 0.007432698 |
| ENSG00000256628 | 35.01881766 | -0.297289578 | 0.294156014 | -1.010652729 | 0.312182669 | 0.483753994 |
| ENSG00000256663 | 43.71482783 | 0.113472205  | 0.277541876 | 0.40884715   | 0.682651836 | 0.799239793 |
| ENSG00000256682 | 9.703473049 | -0.465879811 | 0.599621534 | -0.776956438 | 0.437184472 | 0.603138409 |
| ENSG00000256712 | 33.29639441 | -0.598133038 | 0.306495689 | -1.951521863 | 0.050994998 | 0.123702343 |
| ENSG00000256751 | 10.33097531 | -1.077371339 | 0.555535133 | -1.939339701 | 0.052459988 | 0.126659582 |
| ENSG00000256806 | 24.5570132  | 0.244671617  | 0.359103928 | 0.681339294  | 0.495656825 | 0.654431001 |
| ENSG00000256973 | 9.621478119 | -0.027544865 | 0.547938443 | -0.050269998 | 0.959907231 | 0.978814678 |
| ENSG00000256981 | 24.75256551 | -0.176385141 | 0.348532205 | -0.506079891 | 0.612800567 | 0.748183007 |
| ENSG00000257027 | 17.00919406 | -0.644019516 | 0.432615044 | -1.488666482 | 0.136575215 | 0.266121799 |
| ENSG00000257086 | 11.04337654 | 0.136792168  | 0.517948257 | 0.264103925  | 0.791699839 | 0.875713229 |
| ENSG00000257093 | 68.38304277 | 1.107021745  | 0.234705674 | 4.716638184  | 2.40E-06    | 1.97E-05    |
| ENSG00000257103 | 913.7659871 | -0.046394618 | 0.075844226 | -0.611709288 | 0.540730116 | 0.690575137 |
| ENSG00000257135 | 20.83387955 | -0.249949604 | 0.378816229 | -0.65981757  | 0.509370907 | 0.665836024 |
| ENSG00000257167 | 43.50718335 | -0.481303747 | 0.278882331 | -1.72583091  | 0.084377837 | 0.184103057 |
| ENSG00000257176 | 8.582719397 | -0.785400383 | 0.595671762 | -1.318512027 | 0.187332302 | 0.335645005 |
| ENSG00000257178 | 69.1912535  | -1.053355849 | 0.222648957 | -4.731016322 | 2.23E-06    | 1.84E-05    |
| ENSG00000257218 | 162.1783857 | 0.145210198  | 0.148331759 | 0.978955545  | 0.327601945 | 0.499953039 |
| ENSG00000257242 | 14.79910705 | -0.887901216 | 0.464060938 | -1.913328928 | 0.055705957 | 0.132830007 |
| ENSG00000257261 | 48.37205543 | -1.529951351 | 0.278248859 | -5.498499997 | 3.83E-08    | 4.33E-07    |
| ENSG00000257267 | 117.0524548 | 0.167430786  | 0.16917455  | 0.989692515  | 0.322324435 | 0.494235491 |
| ENSG00000257298 | 15.75252086 | -1.496799582 | 0.476269017 | -3.142760768 | 0.001673626 | 0.007021929 |
| ENSG00000257315 | 113.9662094 | -0.004676161 | 0.172665505 | -0.027082196 | 0.978394175 | 0.988843871 |
| ENSG00000257337 | 23.1870674  | -0.370213599 | 0.367014402 | -1.008716816 | 0.313110465 | 0.484283494 |
| ENSG00000257354 | 65.67697825 | -0.670375112 | 0.219489139 | -3.054251872 | 0.002256226 | 0.009061931 |
| ENSG00000257365 | 37.17855582 | 0.337466635  | 0.298239996 | 1.131527092  | 0.257833307 | 0.423501457 |
| ENSG00000257475 | 9.476023037 | -0.261442867 | 0.566252006 | -0.461707623 | 0.644291004 | 0.770636558 |
| ENSG00000257497 | 8.5699115   | -0.698589815 | 0.614537544 | -1.136773206 | 0.255633107 | 0.420970487 |
| ENSG00000257509 | 8.390413213 | -0.267677215 | 0.609935944 | -0.438861191 | 0.660762119 | 0.783076162 |
| ENSG00000257511 | 19.68093198 | 0.233090428  | 0.398895397 | 0.584339728  | 0.558991769 | 0.705748461 |
| ENSG00000257556 | 11.08295917 | -0.556221004 | 0.526485584 | -1.056479076 | 0.290749395 | 0.46112191  |
| ENSG00000257594 | 25.74950949 | -1.676862949 | 0.396090808 | -4.23353159  | 2.30E-05    | 0.000152502 |
| ENSG00000257621 | 339.5864597 | -0.261282867 | 0.105882536 | -2.467667266 | 0.013599667 | 0.041856818 |
| ENSG00000257698 | 14.49853277 | -0.369024041 | 0.455616251 | -0.809944862 | 0.417971866 | 0.58598722  |
| ENSG00000257702 | 42.08639513 | -1.495321859 | 0.291109657 | -5.136627471 | 2.80E-07    | 2.74E-06    |
| ENSG00000257704 | 75.51878749 | 0.005884755  | 0.211464498 | 0.027828571  | 0.977798878 | 0.988629033 |
| ENSG00000257727 | 87.41603846 | 0.343184591  | 0.190744283 | 1.799186775  | 0.071989141 | 0.162316446 |
| ENSG00000257803 | 9.260959135 | -0.165653893 | 0.570426168 | -0.29040374  | 0.771507383 | 0.863328623 |
| ENSG00000257815 | 19.17086236 | -0.657896427 | 0.418088595 | -1.573581378 | 0.115584261 | 0.234516753 |
| ENSG00000257880 | 15.55546226 | 1.666236428  | 0.473304328 | 3.520433531  | 0.000430842 | 0.002121289 |
| ENSG00000257893 | 29.69333901 | 4.125448045  | 0.511194461 | 8.070212727  | 7.02E-16    | 1.81E-14    |
| ENSG00000257913 | 129.148076  | 0.462617597  | 0.161726174 | 2.86049924   | 0.004229746 | 0.015525908 |
| ENSG00000257923 | 1521.360163 | -0.189146353 | 0.066930149 | -2.826026171 | 0.004712941 | 0.017023062 |
| ENSG00000258011 | 7.094040703 | 0.581822916  | 0.673804014 | 0.863489833  | 0.387868207 | 0.556525506 |



|                 |             |              |             |              |             |             |
|-----------------|-------------|--------------|-------------|--------------|-------------|-------------|
| ENSG00000258017 | 14.87448478 | 0.210792029  | 0.475442    | 0.443360134  | 0.657505267 | 0.780527041 |
| ENSG00000258056 | 40.40581656 | -0.141329243 | 0.27448251  | -0.514893437 | 0.606627487 | 0.743503736 |
| ENSG00000258057 | 9.290259684 | -0.64102542  | 0.594182509 | -1.078835897 | 0.280660889 | 0.449486206 |
| ENSG00000258125 | 15.02065183 | 3.739371732  | 0.680104785 | 5.498228824  | 3.84E-08    | 4.34E-07    |
| ENSG00000258289 | 163.6045385 | -0.476885884 | 0.159061187 | -2.99812853  | 0.002716431 | 0.010590537 |
| ENSG00000258301 | 48.01616061 | 0.057800358  | 0.251078073 | 0.230208707  | 0.817929597 | 0.892592996 |
| ENSG00000258365 | 14.15970686 | -1.035635954 | 0.503636389 | -2.056316771 | 0.039751993 | 0.101360727 |
| ENSG00000258366 | 37.99308276 | -0.188121857 | 0.282916976 | -0.664936618 | 0.506091033 | 0.663653916 |
| ENSG00000258429 | 14.1835042  | 0.513272528  | 0.506067398 | 1.014237491  | 0.310469443 | 0.481844765 |
| ENSG00000258441 | 374.6790831 | -0.636848866 | 0.104516853 | -6.093264825 | 1.11E-09    | 1.53E-08    |
| ENSG00000258469 | 14.93386641 | -0.156594275 | 0.459483355 | -0.340805108 | 0.733250305 | 0.835693316 |
| ENSG00000258525 | 33.44802024 | -0.337384398 | 0.308759376 | -1.092709806 | 0.274521233 | 0.442834148 |
| ENSG00000258561 | 13.63760011 | -0.962596833 | 0.487642268 | -1.973981535 | 0.048383843 | 0.118965139 |
| ENSG00000258568 | 14.80005333 | 0.074951318  | 0.442525213 | 0.169371859  | 0.865504157 | 0.924472427 |
| ENSG00000258603 | 13.73800572 | 0.255472578  | 0.464206042 | 0.550343069  | 0.582084089 | 0.724322418 |
| ENSG00000258616 | 41.95890865 | 4.392801278  | 0.459226523 | 9.565652377  | 1.11E-21    | 4.11E-20    |
| ENSG00000258634 | 128.7776769 | 0.152893041  | 0.167599356 | 0.912253154  | 0.361635469 | 0.532503677 |
| ENSG00000258636 | 26.3487716  | 4.61424877   | 0.614648875 | 7.507129613  | 6.04E-14    | 1.34E-12    |
| ENSG00000258655 | 13.30764494 | 0.023964767  | 0.478670538 | 0.050065264  | 0.96007038  | 0.978814678 |
| ENSG00000258700 | 12.79922568 | 7.32071814   | 1.248522991 | 5.86350287   | 4.53E-09    | 5.80E-08    |
| ENSG00000258704 | 23.33609887 | 0.826603642  | 0.362634339 | 2.279441172  | 0.022640853 | 0.063797179 |
| ENSG00000258725 | 16.03441586 | 0.482775399  | 0.439793459 | 1.097732103  | 0.272321487 | 0.440195619 |
| ENSG00000258727 | 68.16248632 | 1.041001101  | 0.221282075 | 4.70440771   | 2.55E-06    | 2.08E-05    |
| ENSG00000258728 | 11.80784764 | 0.572071556  | 0.505423105 | 1.131866648  | 0.257690502 | 0.423403097 |
| ENSG00000258732 | 114.4032954 | 0.043278884  | 0.167748645 | 0.257998411  | 0.796408134 | 0.878387645 |
| ENSG00000258738 | 11.23550339 | -0.462072582 | 0.543663589 | -0.849923724 | 0.395367495 | 0.563217718 |
| ENSG00000258743 | 7.692433106 | -2.932354392 | 0.820236782 | -3.575009627 | 0.000350215 | 0.001763883 |
| ENSG00000258744 | 16.20450271 | -1.229557375 | 0.451535926 | -2.723055474 | 0.00646812  | 0.022241781 |
| ENSG00000258827 | 7.665530636 | -2.259178403 | 0.739867528 | -3.053490413 | 0.002261959 | 0.00907562  |
| ENSG00000258839 | 39.90139626 | 0.464916466  | 0.273307035 | 1.701077564  | 0.088928423 | 0.191532898 |
| ENSG00000258881 | 11.20000286 | 0.686158019  | 0.527054707 | 1.30187248   | 0.192959981 | 0.343667917 |
| ENSG00000258890 | 350.4122554 | -0.252539036 | 0.109943892 | -2.296981053 | 0.021619851 | 0.061534861 |
| ENSG00000258904 | 8.977404534 | 0.439109579  | 0.588460117 | 0.746201087  | 0.455545951 | 0.619283265 |
| ENSG00000258920 | 23.19705645 | 0.199304996  | 0.358130978 | 0.556514259  | 0.57785935  | 0.721335669 |
| ENSG00000258925 | 7.095106861 | 0.24352704   | 0.671951074 | 0.362417815  | 0.717039828 | 0.823803836 |
| ENSG00000258947 | 32.68965922 | -0.202890697 | 0.322967169 | -0.628208425 | 0.529867412 | 0.682240213 |
| ENSG00000259020 | 11.05772114 | 0.815281362  | 0.555257751 | 1.468293529  | 0.142024508 | 0.273777723 |
| ENSG00000259045 | 28.79238139 | -0.033611058 | 0.339832913 | -0.098904658 | 0.921213971 | 0.956727767 |
| ENSG00000259098 | 130.9866241 | 0.149130502  | 0.17454972  | 0.854372626  | 0.392898558 | 0.561106755 |
| ENSG00000259144 | 8.748383064 | 0.388623342  | 0.604079488 | 0.643331466  | 0.520009043 | 0.674538277 |
| ENSG00000259153 | 13.5558613  | -1.742680586 | 0.518958232 | -3.358036311 | 0.000784983 | 0.003614112 |
| ENSG00000259248 | 10.75323183 | -0.00268577  | 0.525392079 | -0.005111935 | 0.995921284 | 0.99812402  |
| ENSG00000259291 | 10.34134599 | -2.151987956 | 0.619148886 | -3.47571966  | 0.000509485 | 0.002460203 |
| ENSG00000259326 | 14.78458919 | -0.762149318 | 0.463822534 | -1.643191654 | 0.100343286 | 0.210250916 |
| ENSG00000259330 | 88.08385343 | -0.284126264 | 0.19055102  | -1.491077107 | 0.135941252 | 0.26532816  |
| ENSG00000259336 | 28.65789387 | -1.082370187 | 0.355826637 | -3.041846994 | 0.002351314 | 0.009375221 |
| ENSG00000259363 | 42.28526171 | 0.011068369  | 0.271548207 | 0.040760237  | 0.967487039 | 0.982880628 |
| ENSG00000259366 | 40.83431278 | -0.224808084 | 0.276096634 | -0.814236962 | 0.415509215 | 0.583340116 |
| ENSG00000259431 | 31.1840766  | 0.532529149  | 0.30925764  | 1.721959555  | 0.085076845 | 0.185225426 |
| ENSG00000259439 | 95.93755279 | 0.031686246  | 0.182691462 | 0.173441308  | 0.862304558 | 0.921755736 |

|                 |             |              |             |              |             |             |
|-----------------|-------------|--------------|-------------|--------------|-------------|-------------|
| ENSG00000259462 | 12.01476776 | -0.451858694 | 0.511046083 | -0.884183852 | 0.376596974 | 0.546267833 |
| ENSG00000259475 | 28.64509    | 0.24889386   | 0.332830121 | 0.747810502  | 0.454574466 | 0.618431859 |
| ENSG00000259488 | 8.811117657 | -0.063158086 | 0.60263562  | -0.104803108 | 0.916532044 | 0.954800179 |
| ENSG00000259494 | 71.84827166 | 0.102777483  | 0.207446278 | 0.495441443  | 0.620288547 | 0.753606056 |
| ENSG00000259495 | 11.02662019 | -1.854668881 | 0.586137324 | -3.164222452 | 0.001554979 | 0.00658709  |
| ENSG00000259516 | 18.71524547 | 0.040975423  | 0.398439291 | 0.102839816  | 0.918090104 | 0.955355281 |
| ENSG00000259539 | 11.94819772 | -0.027775022 | 0.512140923 | -0.054233162 | 0.9567494   | 0.97684684  |
| ENSG00000259562 | 10.66004187 | -0.265250787 | 0.53134535  | -0.499205999 | 0.617634268 | 0.751514768 |
| ENSG00000259581 | 20.65168473 | -0.181560929 | 0.38816474  | -0.467741941 | 0.639969144 | 0.767565619 |
| ENSG00000259585 | 807.0291813 | -0.826390617 | 0.079890824 | -10.34399922 | 4.46E-25    | 1.99E-23    |
| ENSG00000259592 | 54.21686314 | -0.674285953 | 0.2448567   | -2.75379825  | 0.005890807 | 0.020553444 |
| ENSG00000259605 | 14.64289603 | 0.235625563  | 0.449326175 | 0.52439759   | 0.600002032 | 0.738540882 |
| ENSG00000259642 | 26.42550173 | 0.315966504  | 0.355827094 | 0.887977643  | 0.374552778 | 0.54453973  |
| ENSG00000259663 | 29.25853311 | -0.762041361 | 0.334655613 | -2.27709123  | 0.022780778 | 0.06414143  |
| ENSG00000259673 | 36.82307386 | -0.364469493 | 0.29587816  | -1.231822898 | 0.218015248 | 0.375025739 |
| ENSG00000259687 | 11.18715359 | 0.04201926   | 0.552373425 | 0.076070386  | 0.939363101 | 0.96647136  |
| ENSG00000259706 | 20.71400934 | -0.155018955 | 0.392045955 | -0.395410162 | 0.69254021  | 0.806442206 |
| ENSG00000259768 | 79.90984249 | -0.13424312  | 0.198628655 | -0.675849714 | 0.499136067 | 0.65717165  |
| ENSG00000259781 | 48.29659336 | 0.171008573  | 0.2502248   | 0.683419759  | 0.494341638 | 0.653493035 |
| ENSG00000259790 | 9.736827778 | -0.278798267 | 0.550605507 | -0.50634849  | 0.612612028 | 0.74803209  |
| ENSG00000259797 | 8.266305638 | 0.095039053  | 0.604824939 | 0.157134812  | 0.875138602 | 0.9309407   |
| ENSG00000259802 | 20.83837266 | -0.246058404 | 0.374016244 | -0.657881599 | 0.510614215 | 0.667094297 |
| ENSG00000259820 | 20.26485232 | -0.257067038 | 0.383962599 | -0.669510621 | 0.503169808 | 0.660933822 |
| ENSG00000259865 | 9.621220314 | -0.919465688 | 0.575694444 | -1.597141847 | 0.110234092 | 0.226395741 |
| ENSG00000259891 | 11.24434784 | -1.542558932 | 0.578479149 | -2.666576546 | 0.007662815 | 0.025794289 |
| ENSG00000259895 | 9.782084102 | -0.383121984 | 0.577165712 | -0.663798934 | 0.506819008 | 0.664065744 |
| ENSG00000259915 | 6.045166876 | -1.983984852 | 0.788242778 | -2.516971809 | 0.01183683  | 0.037219882 |
| ENSG00000259917 | 21.7204601  | 0.699008365  | 0.36829333  | 1.897966397  | 0.057700509 | 0.136321964 |
| ENSG00000259921 | 33.05013478 | -0.499860412 | 0.304397154 | -1.642132347 | 0.100562579 | 0.210553369 |
| ENSG00000259924 | 12.95818304 | 0.183101747  | 0.48105608  | 0.380624535  | 0.703481873 | 0.814282078 |
| ENSG00000259943 | 12.98664368 | -0.14670834  | 0.473397962 | -0.309904883 | 0.75663329  | 0.852935384 |
| ENSG00000259946 | 15.92355519 | 1.818590438  | 0.477435164 | 3.809083569  | 0.000139483 | 0.000776581 |
| ENSG00000259956 | 775.6599493 | 0.414243726  | 0.079201357 | 5.230260465  | 1.69E-07    | 1.72E-06    |
| ENSG00000259959 | 55.15640206 | -0.304505323 | 0.243697134 | -1.249523612 | 0.211473623 | 0.366375183 |
| ENSG00000259972 | 45.41269283 | -0.254615342 | 0.27286923  | -0.933103896 | 0.350766328 | 0.5225042   |
| ENSG00000259994 | 20.55696235 | -0.014983626 | 0.382128501 | -0.039210961 | 0.968722195 | 0.983424201 |
| ENSG00000260007 | 25.16228291 | -0.180263395 | 0.348905596 | -0.516653781 | 0.605397865 | 0.742455469 |
| ENSG00000260027 | 298.4586547 | 0.033418027  | 0.109652836 | 0.304762083  | 0.760547362 | 0.855365062 |
| ENSG00000260032 | 1301.192854 | -0.147198085 | 0.072839358 | -2.020859186 | 0.043294344 | 0.109066651 |
| ENSG00000260035 | 13.49410053 | -0.105379659 | 0.503384998 | -0.209342073 | 0.83418121  | 0.902777673 |
| ENSG00000260060 | 19.78063892 | -0.256687398 | 0.392724903 | -0.653606114 | 0.513365604 | 0.669319347 |
| ENSG00000260063 | 16.82714871 | -0.558087409 | 0.430586872 | -1.296108743 | 0.194938023 | 0.346137582 |
| ENSG00000260083 | 12.81974876 | -0.363613508 | 0.490851569 | -0.740780984 | 0.458826247 | 0.622417411 |
| ENSG00000260103 | 11.07993376 | -0.754560117 | 0.535730442 | -1.408469741 | 0.158992021 | 0.297536515 |
| ENSG00000260123 | 10.90659658 | -0.368886871 | 0.523230347 | -0.705018113 | 0.480798964 | 0.641202227 |
| ENSG00000260136 | 8.879875049 | -0.193352258 | 0.574363428 | -0.336637481 | 0.736390198 | 0.837848138 |
| ENSG00000260190 | 9.861214968 | 0.810059993  | 0.559804397 | 1.447041139  | 0.147885402 | 0.282031909 |
| ENSG00000260193 | 10.35513799 | -0.869772306 | 0.565009613 | -1.539393821 | 0.123708182 | 0.247716155 |
| ENSG00000260196 | 99.65752194 | 0.163565783  | 0.183577762 | 0.890989088  | 0.372935024 | 0.543368768 |
| ENSG00000260219 | 22.69317913 | -1.062356868 | 0.375877777 | -2.826335937 | 0.004708386 | 0.017019736 |

|                 |             |              |             |              |             |             |
|-----------------|-------------|--------------|-------------|--------------|-------------|-------------|
| ENSG00000260236 | 52.13650164 | 0.05634045   | 0.263273729 | 0.213999515  | 0.830547436 | 0.90129605  |
| ENSG00000260257 | 47.74029196 | -0.121073161 | 0.263272245 | -0.459878182 | 0.645603662 | 0.771746629 |
| ENSG00000260260 | 89.58940073 | -0.141767309 | 0.192476467 | -0.736543593 | 0.461399948 | 0.624585702 |
| ENSG00000260267 | 18.58060204 | -0.706451691 | 0.416290222 | -1.697017257 | 0.089693398 | 0.192820763 |
| ENSG00000260274 | 10.48408852 | 0.165034481  | 0.528028725 | 0.312548301  | 0.754623861 | 0.851673232 |
| ENSG00000260290 | 7.799393342 | 0.001522795  | 0.618891797 | 0.002460519  | 0.998036792 | 0.999084016 |
| ENSG00000260293 | 47.28383987 | -0.15900832  | 0.267200555 | -0.595089781 | 0.551783459 | 0.699350559 |
| ENSG00000260296 | 9.583124601 | -1.968890132 | 0.657641141 | -2.993867032 | 0.00275466  | 0.010730645 |
| ENSG00000260318 | 53.06538083 | -0.051470497 | 0.246792119 | -0.208558106 | 0.834793218 | 0.90327687  |
| ENSG00000260361 | 8.083016668 | -0.59633035  | 0.626352389 | -0.952068453 | 0.341062267 | 0.512999428 |
| ENSG00000260400 | 60.8278793  | -0.882063018 | 0.238187633 | -3.703227613 | 0.000212874 | 0.001132237 |
| ENSG00000260423 | 9.423604632 | -1.241033908 | 0.631864164 | -1.964083388 | 0.049520422 | 0.120955203 |
| ENSG00000260428 | 137.2378574 | 2.3259246    | 0.176098265 | 13.20810626  | 7.88E-40    | 6.08E-38    |
| ENSG00000260442 | 134.4618568 | -0.445722607 | 0.166796319 | -2.672256858 | 0.007534295 | 0.025422591 |
| ENSG00000260448 | 18.7388768  | 0.254643761  | 0.402607404 | 0.632486534  | 0.527069005 | 0.68011559  |
| ENSG00000260456 | 22.25732834 | 3.207772465  | 0.749557743 | 4.279553505  | 1.87E-05    | 0.000126409 |
| ENSG00000260528 | 15.49175808 | 0.097419315  | 0.464908481 | 0.209545144  | 0.834022698 | 0.902721285 |
| ENSG00000260565 | 86.30607465 | -0.33352877  | 0.191980724 | -1.737303429 | 0.082333627 | 0.180624778 |
| ENSG00000260597 | 140.9178102 | -0.73024514  | 0.160460289 | -4.550939955 | 5.34E-06    | 4.07E-05    |
| ENSG00000260630 | 57.54222913 | -0.928352034 | 0.243867256 | -3.806792467 | 0.000140781 | 0.000783187 |
| ENSG00000260645 | 10.01821288 | 0.279351033  | 0.548075816 | 0.509694142  | 0.610265758 | 0.746529922 |
| ENSG00000260698 | 13.24978892 | -1.274795003 | 0.510070047 | -2.499254779 | 0.01244548  | 0.038866531 |
| ENSG00000260708 | 33.40210577 | 0.866909627  | 0.311388497 | 2.784013008  | 0.005369088 | 0.018997375 |
| ENSG00000260751 | 16.65486221 | 1.094547254  | 0.450341086 | 2.430484999  | 0.01507863  | 0.045737318 |
| ENSG00000260793 | 23.58929345 | -1.333130502 | 0.387506984 | -3.440274776 | 0.000581124 | 0.002769012 |
| ENSG00000260804 | 56.80475723 | -1.154214624 | 0.240657619 | -4.796085946 | 1.62E-06    | 1.37E-05    |
| ENSG00000260852 | 55.6082332  | 0.29722935   | 0.243677205 | 1.219766738  | 0.222553314 | 0.380826702 |
| ENSG00000260855 | 66.97676056 | 0.121268895  | 0.22422525  | 0.540835144  | 0.588621217 | 0.730091746 |
| ENSG00000260912 | 7.498209058 | -0.740545181 | 0.647233267 | -1.144170454 | 0.252552954 | 0.417218786 |
| ENSG00000260916 | 31.71866103 | 0.380051124  | 0.310400388 | 1.224389976  | 0.220805149 | 0.378533021 |
| ENSG00000260917 | 24.11567716 | -0.281814427 | 0.355466927 | -0.792800694 | 0.427893952 | 0.595170447 |
| ENSG00000260918 | 14.39019503 | -7.125124572 | 1.245690835 | -5.719817767 | 1.07E-08    | 1.30E-07    |
| ENSG00000260920 | 57.03613826 | -0.170342555 | 0.239357358 | -0.711666257 | 0.476671467 | 0.63753861  |
| ENSG00000260924 | 9.867110232 | -0.441421452 | 0.578233102 | -0.763397064 | 0.445226631 | 0.610325858 |
| ENSG00000260947 | 29.44264999 | 0.003558624  | 0.323727503 | 0.010992653  | 0.991229308 | 0.995481382 |
| ENSG00000260948 | 18.99654188 | 0.112852699  | 0.403095159 | 0.279965405  | 0.779504047 | 0.868244866 |
| ENSG00000260949 | 10.16365767 | -1.780604278 | 0.608602894 | -2.925724304 | 0.003436553 | 0.012990653 |
| ENSG00000261008 | 90.26723274 | -0.379658276 | 0.190806473 | -1.989755745 | 0.046617849 | 0.115451502 |
| ENSG00000261026 | 136.7340304 | -0.583444878 | 0.170956758 | -3.412821372 | 0.000642941 | 0.003026605 |
| ENSG00000261054 | 11.91764637 | 1.086687052  | 0.521328053 | 2.084459193  | 0.037118418 | 0.095898919 |
| ENSG00000261056 | 21.20971134 | -1.037922006 | 0.392143509 | -2.646791243 | 0.00812595  | 0.027108334 |
| ENSG00000261071 | 12.85664665 | 0.429717116  | 0.473555006 | 0.907428093  | 0.364180459 | 0.535221061 |
| ENSG00000261072 | 23.9928765  | -0.052697358 | 0.359352262 | -0.146645406 | 0.883411912 | 0.935631994 |
| ENSG00000261094 | 10.78387001 | -1.021465756 | 0.53691885  | -1.902458362 | 0.057111257 | 0.135260585 |
| ENSG00000261098 | 32.19534396 | -0.476799627 | 0.307100117 | -1.552586926 | 0.120521851 | 0.2426502   |
| ENSG00000261115 | 28.54755793 | -5.265442014 | 0.76805925  | -6.8555154   | 7.11E-12    | 1.27E-10    |
| ENSG00000261167 | 28.3704516  | -0.479689435 | 0.346198658 | -1.385590106 | 0.165872101 | 0.307537077 |
| ENSG00000261221 | 261.6928716 | -0.101420208 | 0.119428298 | -0.849214216 | 0.395762104 | 0.563477628 |
| ENSG00000261236 | 615.8057411 | 0.422474669  | 0.086709007 | 4.872327379  | 1.10E-06    | 9.66E-06    |
| ENSG00000261315 | 8.803238985 | -0.337210893 | 0.612767885 | -0.550307713 | 0.582108335 | 0.724322418 |

|                 |             |              |             |              |             |             |
|-----------------|-------------|--------------|-------------|--------------|-------------|-------------|
| ENSG00000261326 | 26.29245675 | -0.850915167 | 0.347691754 | -2.447326279 | 0.014392049 | 0.043929836 |
| ENSG00000261341 | 11.83522031 | -1.164635943 | 0.527108949 | -2.2094786   | 0.027141369 | 0.074270709 |
| ENSG00000261342 | 11.79944793 | -0.598134797 | 0.503713528 | -1.187450333 | 0.235050036 | 0.396035487 |
| ENSG00000261351 | 10.64673223 | -0.422454118 | 0.52831823  | -0.799620559 | 0.423930672 | 0.591201918 |
| ENSG00000261373 | 415.1015076 | 0.103328885  | 0.099318152 | 1.040382677  | 0.298162147 | 0.468750272 |
| ENSG00000261455 | 13.2905699  | 0.110370154  | 0.470790092 | 0.234436017  | 0.8146465   | 0.891156404 |
| ENSG00000261485 | 9.488528263 | -0.384954322 | 0.56117003  | -0.685985177 | 0.492722456 | 0.652082093 |
| ENSG00000261514 | 110.8423376 | 0.73236547   | 0.169331387 | 4.325042636  | 1.53E-05    | 0.00010501  |
| ENSG00000261526 | 12.65178608 | -0.009565959 | 0.495707563 | -0.019297586 | 0.984603709 | 0.992018958 |
| ENSG00000261560 | 13.41444532 | -0.340446274 | 0.492380461 | -0.691429293 | 0.489295801 | 0.649021541 |
| ENSG00000261572 | 17.92328465 | -0.313515601 | 0.414445129 | -0.756470711 | 0.449367027 | 0.614331739 |
| ENSG00000261578 | 24.82726554 | -0.109966307 | 0.351638736 | -0.312725236 | 0.754489421 | 0.851612125 |
| ENSG00000261609 | 201.7720225 | -0.409900854 | 0.131077601 | -3.127161705 | 0.001765028 | 0.007348355 |
| ENSG00000261616 | 36.84528793 | 1.283920742  | 0.293504285 | 4.374453149  | 1.22E-05    | 8.56E-05    |
| ENSG00000261655 | 59.35601477 | 1.174842436  | 0.241669722 | 4.861355516  | 1.17E-06    | 1.02E-05    |
| ENSG00000261659 | 28.84130082 | -0.063465164 | 0.324502739 | -0.195576665 | 0.844941526 | 0.910191228 |
| ENSG00000261739 | 6.352252512 | -2.959556515 | 0.915343875 | -3.233272869 | 0.001223806 | 0.005352056 |
| ENSG00000261770 | 80.05918202 | -0.896200841 | 0.208236917 | -4.303755802 | 1.68E-05    | 0.000114731 |
| ENSG00000261799 | 26.78129283 | -0.253021545 | 0.344206163 | -0.735087203 | 0.462286388 | 0.625299652 |
| ENSG00000261801 | 8.989004506 | -0.643225394 | 0.596202061 | -1.078871469 | 0.280645029 | 0.449486206 |
| ENSG00000261824 | 311.3566475 | -0.75943098  | 0.121856835 | -6.232157451 | 4.60E-10    | 6.70E-09    |
| ENSG00000261840 | 11.95536414 | -0.26591124  | 0.494398073 | -0.537848456 | 0.590681675 | 0.731749316 |
| ENSG00000261884 | 11.99941252 | 0.759089868  | 0.524318302 | 1.447765344  | 0.147682688 | 0.281855101 |
| ENSG00000261934 | 16.97100834 | 0.788544671  | 0.430115279 | 1.833333316  | 0.066753018 | 0.153265714 |
| ENSG00000261949 | 568.9478723 | -2.388924312 | 0.101799378 | -23.46698336 | 8.87E-122   | 2.97E-119   |
| ENSG00000261970 | 19.62042224 | -1.362350465 | 0.413449547 | -3.295082738 | 0.000983927 | 0.004427041 |
| ENSG00000261971 | 101.0997798 | -0.185900934 | 0.182732003 | -1.017341957 | 0.308990783 | 0.480151898 |
| ENSG00000262001 | 54.8396256  | -0.518654522 | 0.255295039 | -2.031588717 | 0.04219531  | 0.106853708 |
| ENSG00000262049 | 30.91682738 | 0.366178774  | 0.309111416 | 1.18461744   | 0.236168738 | 0.397355584 |
| ENSG00000262050 | 16.55915789 | -0.504669767 | 0.427461678 | -1.180619908 | 0.237753751 | 0.399106949 |
| ENSG00000262075 | 12.36891772 | -0.09260586  | 0.493775974 | -0.187546305 | 0.851232321 | 0.914699033 |
| ENSG00000262155 | 14.90683229 | -0.838242471 | 0.462839169 | -1.811088015 | 0.070127228 | 0.159217258 |
| ENSG00000262202 | 10.64014248 | 0.76080898   | 0.533897763 | 1.425008744  | 0.154154673 | 0.291128085 |
| ENSG00000262209 | 17.45231817 | 0.029747475  | 0.425026684 | 0.069989665  | 0.944201886 | 0.969036596 |
| ENSG00000262223 | 16.64934023 | -0.694759785 | 0.447692724 | -1.551867493 | 0.120693932 | 0.242892216 |
| ENSG00000262246 | 66.81365852 | 0.506901449  | 0.214889043 | 2.358898531  | 0.018329267 | 0.053807986 |
| ENSG00000262265 | 16.19527525 | -0.42712778  | 0.436943045 | -0.977536513 | 0.32830361  | 0.500640031 |
| ENSG00000262312 | 12.99091597 | -0.323889118 | 0.490899884 | -0.659786503 | 0.509390846 | 0.665836024 |
| ENSG00000262454 | 13.01606417 | -0.320329664 | 0.51150198  | -0.626253029 | 0.53114899  | 0.683094573 |
| ENSG00000262468 | 10.23634574 | -0.21836247  | 0.554493017 | -0.393805626 | 0.69372455  | 0.807352838 |
| ENSG00000262484 | 10.3256289  | -0.1391233   | 0.530891715 | -0.262055888 | 0.793278355 | 0.87679448  |
| ENSG00000262528 | 29.85101503 | 0.817747835  | 0.323597924 | 2.527049073  | 0.011502543 | 0.03634193  |
| ENSG00000262533 | 16.97069922 | 0.229195808  | 0.434307044 | 0.527727587  | 0.597688423 | 0.736869725 |
| ENSG00000262576 | 16.06802617 | -0.488490694 | 0.430784966 | -1.133954832 | 0.256813495 | 0.422535821 |
| ENSG00000262580 | 53.18254009 | 0.713834962  | 0.242912135 | 2.938655011  | 0.003296398 | 0.012524885 |
| ENSG00000262585 | 13.5661828  | -1.436307435 | 0.524695916 | -2.737409215 | 0.006192521 | 0.021409388 |
| ENSG00000262652 | 9.571839097 | -1.137548839 | 0.580252308 | -1.960438285 | 0.049944585 | 0.121750906 |
| ENSG00000262691 | 20.23442682 | 0.715750414  | 0.399747428 | 1.790506617  | 0.073372504 | 0.164642743 |
| ENSG00000262712 | 10.58458854 | 0.57862973   | 0.549158367 | 1.053666419  | 0.292035668 | 0.462535239 |
| ENSG00000262766 | 19.32356053 | 0.253770438  | 0.402499143 | 0.630486904  | 0.528376068 | 0.681051443 |

|                 |             |              |             |              |             |             |
|-----------------|-------------|--------------|-------------|--------------|-------------|-------------|
| ENSG00000262814 | 129.6864382 | 0.132607699  | 0.168708667 | 0.786015927  | 0.431858156 | 0.598137598 |
| ENSG00000262874 | 53.31030331 | -0.808000527 | 0.262808092 | -3.074488767 | 0.002108637 | 0.008527648 |
| ENSG00000262877 | 31.39645937 | -1.011001063 | 0.319616171 | -3.163172444 | 0.001560599 | 0.00660691  |
| ENSG00000262879 | 191.7415421 | -0.395042096 | 0.134139372 | -2.94501227  | 0.003229419 | 0.012290339 |
| ENSG00000262902 | 21.3856276  | -0.310098905 | 0.371374389 | -0.835003475 | 0.403715752 | 0.571903506 |
| ENSG00000262919 | 59.3333502  | 0.14398863   | 0.239264056 | 0.601797999  | 0.547308607 | 0.695750589 |
| ENSG00000263001 | 672.0805134 | 0.264170796  | 0.091015088 | 2.902494554  | 0.003702036 | 0.013823099 |
| ENSG00000263002 | 69.85813346 | 0.535450554  | 0.212388728 | 2.521087434  | 0.011699278 | 0.03686401  |
| ENSG00000263004 | 12.52948596 | -1.570659302 | 0.561073865 | -2.799380615 | 0.005120075 | 0.018254235 |
| ENSG00000263050 | 8.696342042 | -0.183222091 | 0.582580437 | -0.314500933 | 0.753140608 | 0.850814585 |
| ENSG00000263069 | 10.30823932 | -0.483549188 | 0.543380295 | -0.889890915 | 0.373524463 | 0.543607349 |
| ENSG00000263072 | 48.45178389 | 0.182404022  | 0.25046836  | 0.728251751  | 0.466459492 | 0.628880558 |
| ENSG00000263266 | 49.52692896 | 0.033683455  | 0.2556375   | 0.131762573  | 0.895172091 | 0.943073102 |
| ENSG00000263327 | 32.66740431 | -1.200958558 | 0.335776376 | -3.576661857 | 0.00034801  | 0.001755294 |
| ENSG00000263400 | 12.79815757 | 0.170825819  | 0.49119277  | 0.347777551  | 0.72800725  | 0.831881383 |
| ENSG00000263465 | 243.7763577 | 0.161894565  | 0.122969339 | 1.316544159  | 0.187991467 | 0.336611362 |
| ENSG00000263528 | 85.03684279 | -0.168713721 | 0.198110583 | -0.851613872 | 0.394428438 | 0.562548103 |
| ENSG00000263603 | 39.19958501 | 0.295525521  | 0.287427273 | 1.02817495   | 0.30386754  | 0.474638867 |
| ENSG00000263606 | 9.754907628 | -1.065146273 | 0.569519942 | -1.870252812 | 0.061448719 | 0.143574544 |
| ENSG00000263731 | 116.4603437 | -0.295561747 | 0.172457924 | -1.713819468 | 0.086561887 | 0.187644135 |
| ENSG00000263740 | 40.26785509 | -0.838171768 | 0.309318323 | -2.709738501 | 0.006733627 | 0.023036353 |
| ENSG00000263786 | 24.85685939 | 0.437414142  | 0.357253407 | 1.224380602  | 0.220808683 | 0.378533021 |
| ENSG00000263843 | 16.28311789 | -0.601906521 | 0.434859347 | -1.384140701 | 0.166315376 | 0.308088104 |
| ENSG00000263874 | 7.259052803 | -1.126582598 | 0.66911457  | -1.683691625 | 0.092241281 | 0.197035205 |
| ENSG00000263934 | 11082.31184 | 0.357793766  | 0.186716584 | 1.916239891  | 0.055334568 | 0.132146324 |
| ENSG00000263956 | 76.25433825 | 0.200194638  | 0.207071739 | 0.9667888    | 0.333649625 | 0.50583001  |
| ENSG00000264112 | 787.8040644 | -0.059279097 | 0.106055208 | -0.558945649 | 0.576198814 | 0.72035108  |
| ENSG00000264229 | 44.9570723  | 0.394754171  | 0.266606483 | 1.480662308  | 0.138696583 | 0.269209741 |
| ENSG00000264247 | 39.88986198 | -1.109868806 | 0.285038851 | -3.893745719 | 9.87E-05    | 0.000567562 |
| ENSG00000264316 | 17.63058474 | -0.109649538 | 0.429521432 | -0.255283042 | 0.798504497 | 0.88000884  |
| ENSG00000264350 | 74.36350499 | 0.191047348  | 0.206295549 | 0.926085651  | 0.35440147  | 0.525826821 |
| ENSG00000264364 | 516.3789651 | -0.070109062 | 0.101976046 | -0.687505196 | 0.491764427 | 0.651295106 |
| ENSG00000264456 | 10.94399998 | -0.210117839 | 0.527678791 | -0.398192693 | 0.690488152 | 0.805254219 |
| ENSG00000264522 | 697.4047071 | -0.18985886  | 0.087019711 | -2.181791434 | 0.029124929 | 0.078616041 |
| ENSG00000264546 | 8.075767856 | -0.456239642 | 0.64117555  | -0.711567436 | 0.476732678 | 0.63753861  |
| ENSG00000264743 | 9.450928302 | 0.166192348  | 0.562119408 | 0.295653104  | 0.767495014 | 0.860009596 |
| ENSG00000264853 | 13.88550848 | -0.257476155 | 0.475066117 | -0.541979624 | 0.587832543 | 0.729570925 |
| ENSG00000264895 | 99.34764995 | -0.619231499 | 0.181323994 | -3.415055482 | 0.00063769  | 0.003007936 |
| ENSG00000264920 | 28.32275243 | -0.530170329 | 0.337773324 | -1.569603905 | 0.116507289 | 0.235990463 |
| ENSG00000265142 | 9.56733429  | -2.134136132 | 0.642618735 | -3.320998929 | 0.000896959 | 0.004080175 |
| ENSG00000265145 | 11.66714526 | -0.291857603 | 0.519355681 | -0.561960934 | 0.574142636 | 0.718419883 |
| ENSG00000265185 | 26.36035521 | 0.603027263  | 0.352836373 | 1.709084744  | 0.087435253 | 0.188922499 |
| ENSG00000265241 | 258.088687  | -0.108529442 | 0.118547456 | -0.915493639 | 0.35993254  | 0.531230298 |
| ENSG00000265354 | 413.7844925 | 0.001753419  | 0.104940733 | 0.016708661  | 0.986669037 | 0.992960307 |
| ENSG00000265458 | 12.85076854 | -1.157327396 | 0.505118442 | -2.291200043 | 0.021951846 | 0.062269303 |
| ENSG00000265491 | 260.8722304 | -0.338741688 | 0.119139887 | -2.843226531 | 0.004465932 | 0.016270418 |
| ENSG00000265590 | 11.3407857  | -0.408279084 | 0.517793948 | -0.788497212 | 0.430405929 | 0.597156056 |
| ENSG00000265666 | 16.82534866 | -0.7599706   | 0.443237617 | -1.714589582 | 0.0864205   | 0.187453484 |
| ENSG00000265681 | 266.8368608 | -0.050478652 | 0.117007276 | -0.431414641 | 0.666166906 | 0.786348438 |
| ENSG00000265688 | 85.35858372 | 0.182082797  | 0.191552057 | 0.950565606  | 0.341824935 | 0.513706523 |

|                 |             |              |             |              |             |             |
|-----------------|-------------|--------------|-------------|--------------|-------------|-------------|
| ENSG00000265735 | 175.4316499 | -0.687827032 | 0.168395188 | -4.084600274 | 4.42E-05    | 0.000275161 |
| ENSG00000265763 | 8.729846517 | -0.283503563 | 0.580930967 | -0.488015925 | 0.625538561 | 0.757038009 |
| ENSG00000265778 | 9.756469817 | -0.252453612 | 0.544440166 | -0.463693951 | 0.642867031 | 0.769588648 |
| ENSG00000265806 | 7.57258658  | -0.503224643 | 0.652555305 | -0.771160144 | 0.440612015 | 0.60586547  |
| ENSG00000265808 | 222.2438089 | 0.428899058  | 0.14964803  | 2.866052141  | 0.004156258 | 0.015311554 |
| ENSG00000265817 | 144.0677941 | -0.251513575 | 0.164835308 | -1.525847692 | 0.1270478   | 0.252210352 |
| ENSG00000265972 | 265.3218317 | -0.392616859 | 0.119674212 | -3.280713984 | 0.001035447 | 0.00463547  |
| ENSG00000266019 | 23.54923687 | 0.315549897  | 0.358848535 | 0.879340073  | 0.379216914 | 0.548764808 |
| ENSG00000266028 | 896.3832428 | -0.255046074 | 0.073825524 | -3.454714045 | 0.000550877 | 0.002641914 |
| ENSG00000266066 | 11.58400982 | 0.526605268  | 0.549953625 | 0.957544861  | 0.338292315 | 0.510265437 |
| ENSG00000266074 | 953.052227  | -0.562393534 | 0.093496761 | -6.015112504 | 1.80E-09    | 2.43E-08    |
| ENSG00000266094 | 86.53447615 | 0.915743658  | 0.194779856 | 4.701428964  | 2.58E-06    | 2.11E-05    |
| ENSG00000266126 | 10.64313849 | 0.245746881  | 0.536514133 | 0.458043629  | 0.646921097 | 0.772538913 |
| ENSG00000266155 | 11.92289258 | 0.090158685  | 0.498144293 | 0.180989096  | 0.856376135 | 0.917757792 |
| ENSG00000266173 | 123.1416706 | -0.018835696 | 0.172071701 | -0.109464231 | 0.912834291 | 0.953048924 |
| ENSG00000266208 | 23.60304454 | -0.91756614  | 0.374480792 | -2.450235525 | 0.01427628  | 0.043619328 |
| ENSG00000266256 | 50.24834349 | -1.46054887  | 0.266816182 | -5.47398909  | 4.40E-08    | 4.91E-07    |
| ENSG00000266338 | 105.295352  | 0.262419816  | 0.179968828 | 1.458140384  | 0.144801852 | 0.277783072 |
| ENSG00000266402 | 264.5747898 | -0.08877545  | 0.133145146 | -0.666756937 | 0.504927404 | 0.662682319 |
| ENSG00000266412 | 529.0468404 | 0.062846733  | 0.092217397 | 0.681506263  | 0.495551205 | 0.654353053 |
| ENSG00000266472 | 1025.046039 | 0.552395113  | 0.078511722 | 7.035829838  | 1.98E-12    | 3.84E-11    |
| ENSG00000266714 | 144.7670482 | -0.28495619  | 0.157243733 | -1.812194262 | 0.069956185 | 0.158957382 |
| ENSG00000266777 | 15.50925957 | 0.06782294   | 0.432708747 | 0.156740396  | 0.875449449 | 0.931046487 |
| ENSG00000266830 | 60.10949505 | 2.789923434  | 0.281092251 | 9.92529472   | 3.23E-23    | 1.29E-21    |
| ENSG00000266844 | 20.19897264 | -0.461840337 | 0.400167145 | -1.154118581 | 0.248451557 | 0.412677435 |
| ENSG00000266962 | 135.6894336 | 0.190993885  | 0.159045808 | 1.200873429  | 0.229800303 | 0.388728908 |
| ENSG00000266965 | 28.50536546 | 0.291489767  | 0.322101287 | 0.904963063  | 0.365484956 | 0.53674513  |
| ENSG00000266967 | 26.15275634 | 0.428978477  | 0.342573768 | 1.252222197  | 0.21048891  | 0.365654348 |
| ENSG00000266983 | 12.41631796 | 0.008114307  | 0.483680488 | 0.016776171  | 0.98661518  | 0.992960307 |
| ENSG00000266993 | 16.79730306 | -1.621026986 | 0.463048898 | -3.500768479 | 0.000463919 | 0.002264304 |
| ENSG00000267002 | 47.83697303 | -0.015440374 | 0.260137177 | -0.059354737 | 0.952669564 | 0.974026448 |
| ENSG00000267040 | 25.84384884 | -0.260358281 | 0.3386224   | -0.768874951 | 0.441967549 | 0.607051742 |
| ENSG00000267041 | 64.0872797  | -0.006516136 | 0.222830499 | -0.029242567 | 0.976671132 | 0.988350939 |
| ENSG00000267042 | 28.43235508 | -0.132446686 | 0.346469506 | -0.382275161 | 0.702257277 | 0.813676721 |
| ENSG00000267060 | 11.75948904 | -2.701197564 | 0.641695221 | -4.209471222 | 2.56E-05    | 0.000168333 |
| ENSG00000267080 | 109.3626311 | 0.325427306  | 0.175708816 | 1.852082971  | 0.064013909 | 0.148309976 |
| ENSG00000267100 | 31.8507238  | 0.066130526  | 0.309538492 | 0.213642334  | 0.830825983 | 0.901344809 |
| ENSG00000267106 | 50.809311   | 0.291723579  | 0.241168662 | 1.209624736  | 0.226422922 | 0.384823083 |
| ENSG00000267119 | 9.588616811 | -0.137218277 | 0.589407743 | -0.232807049 | 0.815911239 | 0.891907519 |
| ENSG00000267147 | 28.20096054 | -0.528457091 | 0.32642438  | -1.618926536 | 0.105463071 | 0.218501439 |
| ENSG00000267199 | 10.61089683 | -0.601353997 | 0.534873874 | -1.124291212 | 0.260889505 | 0.427162401 |
| ENSG00000267213 | 13.59273184 | 0.685764369  | 0.475121115 | 1.443346438  | 0.148922904 | 0.283496414 |
| ENSG00000267216 | 16.97423424 | -0.288413619 | 0.415431314 | -0.694251035 | 0.487524792 | 0.64779673  |
| ENSG00000267248 | 7.520974737 | -0.876232741 | 0.643994318 | -1.360621851 | 0.173633223 | 0.317581495 |
| ENSG00000267265 | 16.71092354 | -0.218189805 | 0.43579918  | -0.500665936 | 0.61660625  | 0.750779831 |
| ENSG00000267270 | 49.94126551 | -0.339919133 | 0.263825919 | -1.288422057 | 0.197599085 | 0.349141427 |
| ENSG00000267272 | 20.29069059 | -0.201187802 | 0.415193426 | -0.484564037 | 0.62798563  | 0.758692194 |
| ENSG00000267278 | 9.892724514 | 0.773790339  | 0.548953346 | 1.409573955  | 0.158665522 | 0.297090721 |
| ENSG00000267280 | 58.00417855 | -0.254455301 | 0.247827712 | -1.02674273  | 0.304541623 | 0.475480291 |
| ENSG00000267296 | 32.93926408 | -0.776424203 | 0.306557444 | -2.532720112 | 0.011318129 | 0.035823738 |

|                 |             |              |             |              |             |             |
|-----------------|-------------|--------------|-------------|--------------|-------------|-------------|
| ENSG00000267317 | 35.41370957 | -0.236401996 | 0.326039774 | -0.725071034 | 0.468408454 | 0.630503404 |
| ENSG00000267321 | 53.84196144 | -0.267501004 | 0.242492592 | -1.103130621 | 0.269970445 | 0.437301066 |
| ENSG00000267322 | 217.1967408 | 0.562349847  | 0.338154818 | 1.662995222  | 0.096313392 | 0.20372146  |
| ENSG00000267325 | 14.44547056 | -6.141477618 | 1.233616782 | -4.978432288 | 6.41E-07    | 5.93E-06    |
| ENSG00000267327 | 6.021380085 | -5.871750897 | 1.310204252 | -4.481553841 | 7.41E-06    | 5.46E-05    |
| ENSG00000267348 | 13.38812319 | -0.191214903 | 0.485108507 | -0.394169345 | 0.693456016 | 0.807174069 |
| ENSG00000267374 | 76.87174127 | -0.634370623 | 0.212970347 | -2.978680512 | 0.002894925 | 0.01119161  |
| ENSG00000267397 | 15.65171415 | -0.644014752 | 0.457775741 | -1.406834601 | 0.15947644  | 0.298195324 |
| ENSG00000267430 | 8.835759796 | 0.007842386  | 0.583382834 | 0.013442949  | 0.989274402 | 0.994711464 |
| ENSG00000267432 | 18.49423414 | 0.330573491  | 0.395720032 | 0.835372143  | 0.40350821  | 0.571732068 |
| ENSG00000267475 | 12.47467968 | -0.055731744 | 0.520778865 | -0.10701614  | 0.914776176 | 0.953830969 |
| ENSG00000267493 | 14.38910402 | 0.247891221  | 0.458380241 | 0.540798225  | 0.588646666 | 0.730091746 |
| ENSG00000267508 | 22.29583716 | -0.350281096 | 0.377121287 | -0.928828755 | 0.35297784  | 0.524343746 |
| ENSG00000267519 | 58.38350521 | -0.679477133 | 0.244574774 | -2.778197944 | 0.005466131 | 0.019285429 |
| ENSG00000267526 | 15.16811292 | -0.208862297 | 0.443027741 | -0.471442932 | 0.637324464 | 0.765956258 |
| ENSG00000267534 | 92.05265159 | -0.041283147 | 0.189286111 | -0.218099187 | 0.827351831 | 0.898686295 |
| ENSG00000267541 | 11.06091334 | -1.034160692 | 0.534424671 | -1.935091601 | 0.052979056 | 0.127540154 |
| ENSG00000267575 | 179.5464466 | 0.077578752  | 0.138416514 | 0.560473241  | 0.575156687 | 0.71949648  |
| ENSG00000267577 | 8.270779448 | 2.558157152  | 0.720429962 | 3.550875571  | 0.000383952 | 0.00191594  |
| ENSG00000267587 | 11.34382309 | 0.17227859   | 0.531497475 | 0.324138115  | 0.745833472 | 0.845033294 |
| ENSG00000267632 | 14.65695904 | 0.251961624  | 0.456665098 | 0.551742677  | 0.581124666 | 0.723664022 |
| ENSG00000267680 | 75.60230471 | 0.173122756  | 0.219743219 | 0.787841178  | 0.430789612 | 0.597477385 |
| ENSG00000267698 | 9.319221867 | 0.449882457  | 0.557278472 | 0.80728483   | 0.419502402 | 0.587278278 |
| ENSG00000267751 | 146.9669032 | -0.232862644 | 0.151756092 | -1.534453348 | 0.124918162 | 0.249318239 |
| ENSG00000267787 | 24.8514318  | -0.293891487 | 0.360381566 | -0.815500886 | 0.414785657 | 0.582882566 |
| ENSG00000267796 | 13.63466375 | 0.645558548  | 0.496933092 | 1.299085446  | 0.193914607 | 0.34476587  |
| ENSG00000267858 | 31.73577682 | -0.185350563 | 0.305462286 | -0.606787064 | 0.543992234 | 0.692782685 |
| ENSG00000267904 | 21.82888327 | 0.202397549  | 0.376806382 | 0.537139386  | 0.591171336 | 0.732033124 |
| ENSG00000268006 | 12.41274182 | -0.424043242 | 0.515090088 | -0.823240929 | 0.410370998 | 0.578821309 |
| ENSG00000268043 | 93.22668331 | 0.035529577  | 0.197955476 | 0.179482666  | 0.857558727 | 0.918429967 |
| ENSG00000268049 | 21.59988335 | -0.404803272 | 0.3757526   | -1.077313298 | 0.281340324 | 0.450317631 |
| ENSG00000268061 | 12.62612181 | -1.031356677 | 0.528078371 | -1.953037151 | 0.050815193 | 0.1233372   |
| ENSG00000268129 | 8.075238855 | 0.296457874  | 0.630320253 | 0.470328968  | 0.638120005 | 0.766295498 |
| ENSG00000268205 | 144.9649881 | 0.174819731  | 0.153195584 | 1.141153854  | 0.253805904 | 0.418674985 |
| ENSG00000268222 | 9.043216979 | 0.300744253  | 0.596138354 | 0.504487341  | 0.613918956 | 0.748716754 |
| ENSG00000268362 | 167.0452753 | -0.414495683 | 0.144186672 | -2.874715646 | 0.004043915 | 0.014944719 |
| ENSG00000268364 | 18.19488897 | -0.533615491 | 0.408834699 | -1.305210865 | 0.191821056 | 0.342028113 |
| ENSG00000268403 | 20.06833078 | 0.342472917  | 0.381561626 | 0.897555976  | 0.369422318 | 0.540887566 |
| ENSG00000268471 | 8.163345086 | -0.470464494 | 0.620946708 | -0.757656797 | 0.448656469 | 0.61365895  |
| ENSG00000268516 | 94.23610085 | 0.155394851  | 0.182235564 | 0.852714188  | 0.393817821 | 0.561848357 |
| ENSG00000268573 | 16.96484928 | 0.858945152  | 0.427341377 | 2.009974224  | 0.044433917 | 0.11112039  |
| ENSG00000268575 | 14.94571659 | -0.397131417 | 0.446133235 | -0.890163265 | 0.373378226 | 0.54353703  |
| ENSG00000268858 | 55.9350406  | -0.239590403 | 0.232373308 | -1.031058194 | 0.302513531 | 0.47315528  |
| ENSG00000268895 | 42.32766728 | -0.395758182 | 0.272502324 | -1.452311219 | 0.14641509  | 0.280050757 |
| ENSG00000268903 | 24.11460537 | 0.031391545  | 0.372739928 | 0.084218359  | 0.932882822 | 0.963270344 |
| ENSG00000268996 | 10.91396197 | 0.715875754  | 0.555147343 | 1.289523878  | 0.197216021 | 0.34864     |
| ENSG00000269044 | 31.69629626 | -0.469828114 | 0.326634126 | -1.438392615 | 0.150322687 | 0.285619205 |
| ENSG00000269069 | 22.81462509 | -0.732963079 | 0.388554214 | -1.886385614 | 0.05924301  | 0.13934805  |
| ENSG00000269151 | 10.48921075 | -1.108066197 | 0.548505651 | -2.020154567 | 0.043367357 | 0.109133154 |
| ENSG00000269176 | 14.81568023 | 0.295612308  | 0.457418149 | 0.646262743  | 0.518109212 | 0.673067613 |

|                 |             |              |             |              |             |             |
|-----------------|-------------|--------------|-------------|--------------|-------------|-------------|
| ENSG00000269190 | 467.9457109 | 0.158957317  | 0.093618184 | 1.697932077  | 0.089520582 | 0.192542585 |
| ENSG00000269293 | 61.01582083 | 0.160158998  | 0.221543857 | 0.722922314  | 0.469727614 | 0.631654585 |
| ENSG00000269313 | 11.81846638 | 0.130713063  | 0.495177433 | 0.263972173  | 0.791801361 | 0.875713229 |
| ENSG00000269335 | 21.71170407 | -0.585436396 | 0.379352435 | -1.543251981 | 0.12276965  | 0.246340767 |
| ENSG00000269343 | 94.73536549 | 0.259912791  | 0.18528475  | 1.402774869  | 0.160683983 | 0.299870853 |
| ENSG00000269352 | 51.87491891 | 0.214898048  | 0.240764772 | 0.892564329  | 0.372090529 | 0.542757597 |
| ENSG00000269374 | 20.61343479 | -0.087502585 | 0.400442269 | -0.218514856 | 0.827027985 | 0.898668717 |
| ENSG00000269386 | 34.47668316 | 0.17112211   | 0.298039822 | 0.574158545  | 0.565860519 | 0.711478939 |
| ENSG00000269416 | 10.94175907 | -2.880451353 | 0.69619258  | -4.137434719 | 3.51E-05    | 0.000223739 |
| ENSG00000269439 | 15.65477926 | -0.295764293 | 0.441733067 | -0.669554342 | 0.503141928 | 0.660933822 |
| ENSG00000269473 | 13.47079405 | -0.075076606 | 0.475387625 | -0.157927135 | 0.874514216 | 0.930487895 |
| ENSG00000269486 | 23.10928473 | -0.241616517 | 0.374138468 | -0.645794371 | 0.518412534 | 0.673338255 |
| ENSG00000269514 | 11.22222756 | -0.433851223 | 0.520401978 | -0.833684807 | 0.404458622 | 0.57249398  |
| ENSG00000269556 | 31.06139114 | -0.012627192 | 0.314112556 | -0.040199576 | 0.967934016 | 0.983065728 |
| ENSG00000269609 | 94.01093203 | 0.186477685  | 0.195456236 | 0.954063623  | 0.340051438 | 0.511753006 |
| ENSG00000269688 | 14.88028603 | 0.328937951  | 0.465937094 | 0.705970732  | 0.480206339 | 0.640808597 |
| ENSG00000269713 | 125.3408079 | 0.189783939  | 0.16737902  | 1.133857391  | 0.256854373 | 0.422535821 |
| ENSG00000269720 | 18.1929914  | 1.840631435  | 0.436147519 | 4.220203846  | 2.44E-05    | 0.000160968 |
| ENSG00000269743 | 39.41748189 | -0.105696028 | 0.281736243 | -0.375159499 | 0.707541849 | 0.816600144 |
| ENSG00000269821 | 4264.242229 | -0.599933478 | 0.083352508 | -7.197545635 | 6.13E-13    | 1.24E-11    |
| ENSG00000269825 | 46.51027747 | 0.394410888  | 0.254387461 | 1.550433682  | 0.12103746  | 0.243478905 |
| ENSG00000269837 | 9.431632569 | -0.895544206 | 0.575605512 | -1.555829795 | 0.119748571 | 0.241508712 |
| ENSG00000269858 | 83.75921611 | 0.30901171   | 0.191403236 | 1.61445395   | 0.106428998 | 0.2202428   |
| ENSG00000269893 | 247.7597062 | 0.158645922  | 0.122472742 | 1.295356988  | 0.195197109 | 0.346334948 |
| ENSG00000269918 | 13.25772845 | -0.685524328 | 0.483471179 | -1.417921807 | 0.156213595 | 0.293831329 |
| ENSG00000269929 | 119.9357934 | -0.592613984 | 0.189141111 | -3.133184429 | 0.001729208 | 0.00722922  |
| ENSG00000269937 | 20.96755561 | 0.089549055  | 0.392135039 | 0.228362799  | 0.819364207 | 0.893395096 |
| ENSG00000269951 | 9.308646485 | 0.25833554   | 0.558136794 | 0.462853449  | 0.643469417 | 0.769990566 |
| ENSG00000269958 | 41.69564624 | -0.112291165 | 0.277973625 | -0.403963378 | 0.686239649 | 0.801964089 |
| ENSG00000269967 | 7.26428327  | -0.17823613  | 0.684547378 | -0.260370773 | 0.794577785 | 0.877609227 |
| ENSG00000269968 | 20.51274308 | 0.167271663  | 0.391442564 | 0.427321089  | 0.669145474 | 0.788596542 |
| ENSG00000269973 | 31.18822071 | -0.599335528 | 0.314669208 | -1.904652611 | 0.056825243 | 0.134801789 |
| ENSG00000270006 | 10.77882618 | -1.379199675 | 0.553461455 | -2.491952531 | 0.012704302 | 0.039578027 |
| ENSG00000270012 | 10.91049758 | -0.709137187 | 0.536549423 | -1.321662378 | 0.186280602 | 0.334443202 |
| ENSG00000270019 | 9.449337084 | -0.330744413 | 0.56486598  | -0.58552723  | 0.558193262 | 0.705122829 |
| ENSG00000270020 | 8.737543706 | -0.622701965 | 0.599138522 | -1.039328874 | 0.298651811 | 0.469182736 |
| ENSG00000270049 | 10.90439751 | 0.536608369  | 0.53948495  | 0.994667911  | 0.319897806 | 0.491587844 |
| ENSG00000270061 | 8.586065723 | -0.003505278 | 0.603222577 | -0.00581092  | 0.995363583 | 0.997940364 |
| ENSG00000270069 | 57.38541474 | -0.529862531 | 0.238783128 | -2.219011602 | 0.026485935 | 0.072793569 |
| ENSG00000270072 | 12.39170933 | 0.033959333  | 0.544927998 | 0.062318937  | 0.950308849 | 0.972594511 |
| ENSG00000270140 | 9.420345097 | 0.294344691  | 0.600856312 | 0.489875342  | 0.624222113 | 0.755965861 |
| ENSG00000270170 | 147.8791565 | -0.104034003 | 0.154976637 | -0.671288295 | 0.50203689  | 0.66031013  |
| ENSG00000270175 | 15.69426366 | -0.572446766 | 0.43879521  | -1.304587545 | 0.192033332 | 0.342321347 |
| ENSG00000270194 | 19.84018487 | 0.528115974  | 0.409046207 | 1.291091238  | 0.196672042 | 0.347928616 |
| ENSG00000270225 | 29.21324754 | 0.049186511  | 0.330337231 | 0.148897873  | 0.881634219 | 0.934792614 |
| ENSG00000270231 | 75.57069098 | 0.101354369  | 0.204042378 | 0.496731954  | 0.619378086 | 0.752890617 |
| ENSG00000270307 | 35.77678724 | -0.214470242 | 0.290307779 | -0.7387685   | 0.460047582 | 0.623291704 |
| ENSG00000270344 | 91.43688988 | -1.885213297 | 0.216129006 | -8.722629767 | 2.72E-18    | 8.37E-17    |
| ENSG00000270350 | 189.0353576 | -0.411230022 | 0.15655001  | -2.626828463 | 0.008618477 | 0.028490657 |
| ENSG00000270362 | 21.22480335 | -0.610424435 | 0.396210803 | -1.54065571  | 0.123400602 | 0.247209663 |



|                 |             |              |             |              |             |             |
|-----------------|-------------|--------------|-------------|--------------|-------------|-------------|
| ENSG00000270388 | 146.8925505 | -0.419821387 | 0.152470874 | -2.753453009 | 0.005897024 | 0.020570025 |
| ENSG00000270441 | 8.43076888  | -1.051233969 | 0.627767557 | -1.67455925  | 0.09402074  | 0.199925725 |
| ENSG00000270558 | 30.86162947 | -0.35031591  | 0.327537524 | -1.069544356 | 0.284824453 | 0.454408643 |
| ENSG00000270574 | 11.80515449 | -0.249541564 | 0.499983058 | -0.49910004  | 0.61770891  | 0.751514768 |
| ENSG00000270605 | 9.042510797 | -0.367493603 | 0.5720771   | -0.642384746 | 0.520623401 | 0.674960491 |
| ENSG00000270629 | 27.15798062 | 0.125654771  | 0.335524909 | 0.374502066  | 0.70803082  | 0.81689601  |
| ENSG00000270647 | 2522.61742  | 0.284381084  | 0.078612729 | 3.617494125  | 0.000297469 | 0.001527806 |
| ENSG00000270722 | 134.9540592 | 0.160805326  | 0.162371305 | 0.990355568  | 0.322000355 | 0.493846379 |
| ENSG00000270804 | 12.13026323 | 0.21676493   | 0.50086681  | 0.432779585  | 0.665174906 | 0.785780162 |
| ENSG00000270885 | 236.1290421 | 0.260740394  | 0.132503976 | 1.967792985  | 0.049091862 | 0.120221998 |
| ENSG00000270906 | 66.08153073 | -0.441483133 | 0.223559514 | -1.974790176 | 0.048291964 | 0.118801615 |
| ENSG00000270959 | 11.54932092 | 0.022351088  | 0.499896572 | 0.044711425  | 0.964337327 | 0.981313129 |
| ENSG00000270977 | 25.79827224 | 0.248206573  | 0.34630373  | 0.716730869  | 0.473540175 | 0.634776108 |
| ENSG00000271013 | 27.88990348 | 0.139841347  | 0.326413872 | 0.428417293  | 0.668347337 | 0.788069759 |
| ENSG00000271074 | 12.6933394  | -2.930290075 | 0.647800932 | -4.523442201 | 6.08E-06    | 4.58E-05    |
| ENSG00000271122 | 27.92268977 | -0.408190516 | 0.351470738 | -1.161378378 | 0.245488058 | 0.409010883 |
| ENSG00000271147 | 18.17410266 | 0.342882746  | 0.4033636   | 0.85005872   | 0.395292441 | 0.563217718 |
| ENSG00000271204 | 98.46989818 | 1.208513766  | 0.202240842 | 5.975616767  | 2.29E-09    | 3.06E-08    |
| ENSG00000271207 | 7.702493337 | 0.088988276  | 0.619531117 | 0.143638105  | 0.885786249 | 0.937510506 |
| ENSG00000271254 | 41.73374561 | -0.191720462 | 0.273091818 | -0.702036637 | 0.482656316 | 0.643251733 |
| ENSG00000271270 | 53.50354101 | -0.223091837 | 0.251545738 | -0.886883788 | 0.375141471 | 0.545113504 |
| ENSG00000271303 | 33.11839377 | 0.482536808  | 0.329478985 | 1.464545025  | 0.14304509  | 0.275291736 |
| ENSG00000271380 | 9.315248111 | -0.617348087 | 0.60898802  | -1.013727802 | 0.310712654 | 0.482114288 |
| ENSG00000271425 | 15.49988809 | -0.044265174 | 0.432330849 | -0.102387266 | 0.918449291 | 0.955355281 |
| ENSG00000271533 | 35.33982688 | 0.005321515  | 0.300373463 | 0.017716328  | 0.985865155 | 0.992629448 |
| ENSG00000271601 | 431.9000662 | -0.037634549 | 0.098015659 | -0.383964661 | 0.70100464  | 0.812392722 |
| ENSG00000271615 | 9.139573757 | -5.463604634 | 1.263764677 | -4.323276899 | 1.54E-05    | 0.000105751 |
| ENSG00000271643 | 43.8278811  | -0.24109561  | 0.27132229  | -0.888594925 | 0.374220819 | 0.544273699 |
| ENSG00000271687 | 13.59829851 | -0.379520172 | 0.487325523 | -0.778781642 | 0.436108353 | 0.602183627 |
| ENSG00000271754 | 8.968054424 | -0.90299358  | 0.606075729 | -1.489902229 | 0.136249945 | 0.265805225 |
| ENSG00000271780 | 26.15661414 | 0.821638728  | 0.353492999 | 2.324342292  | 0.020107156 | 0.058032714 |
| ENSG00000271781 | 28.01898924 | -1.14256755  | 0.348861584 | -3.275131463 | 0.001056128 | 0.004718649 |
| ENSG00000271811 | 7.921879635 | -6.267855097 | 1.28492389  | -4.877997169 | 1.07E-06    | 9.41E-06    |
| ENSG00000271852 | 9.746891949 | 0.178494336  | 0.548252974 | 0.325569298  | 0.744750244 | 0.844210781 |
| ENSG00000271862 | 9.919144901 | -0.705082676 | 0.564412467 | -1.249232994 | 0.211579868 | 0.366514046 |
| ENSG00000271918 | 17.60841744 | 0.854559893  | 0.431118681 | 1.98219175   | 0.047457784 | 0.116995347 |
| ENSG00000271936 | 51.18130186 | -0.332286549 | 0.249186956 | -1.333482916 | 0.182373378 | 0.329357128 |
| ENSG00000271943 | 16.07397855 | -0.822647955 | 0.436556349 | -1.884402682 | 0.059510527 | 0.139836798 |
| ENSG00000271976 | 29.49597546 | -0.631906169 | 0.329335847 | -1.918728781 | 0.055018667 | 0.131570857 |
| ENSG00000271984 | 7.195240915 | 0.033837213  | 0.653248605 | 0.05179837   | 0.958689354 | 0.977761516 |
| ENSG00000272031 | 213.6726117 | 0.494610028  | 0.131136112 | 3.771730147  | 0.00016212  | 0.000886796 |
| ENSG00000272033 | 20.39117685 | -0.424283041 | 0.380578412 | -1.114837384 | 0.264920113 | 0.431659069 |
| ENSG00000272046 | 50.22353377 | 0.115555598  | 0.256918185 | 0.44977586   | 0.652872066 | 0.777194399 |
| ENSG00000272047 | 208.1765323 | 0.065671404  | 0.127184652 | 0.516346928  | 0.605612126 | 0.74264806  |
| ENSG00000272068 | 34.2855805  | -1.044280682 | 0.336972328 | -3.099010205 | 0.001941683 | 0.007979762 |
| ENSG00000272077 | 56.80147502 | -0.209918272 | 0.23224484  | -0.903866251 | 0.366066327 | 0.537374197 |
| ENSG00000272086 | 9.279038885 | -0.958579885 | 0.586923103 | -1.633229089 | 0.102420824 | 0.21372934  |
| ENSG00000272137 | 31.852531   | -1.758567359 | 0.356299368 | -4.935645459 | 7.99E-07    | 7.24E-06    |
| ENSG00000272142 | 40.26117751 | -0.18399797  | 0.28355076  | -0.648906634 | 0.516398726 | 0.67134224  |
| ENSG00000272145 | 21.41660608 | -0.353972594 | 0.372265294 | -0.950861119 | 0.341674882 | 0.513645876 |

|                 |             |              |             |              |             |             |
|-----------------|-------------|--------------|-------------|--------------|-------------|-------------|
| ENSG00000272153 | 7.423724685 | -1.035711517 | 0.67842311  | -1.526645395 | 0.126849212 | 0.252037117 |
| ENSG00000272195 | 12.71034155 | -0.655433333 | 0.491862197 | -1.332554803 | 0.182677946 | 0.329787573 |
| ENSG00000272219 | 10.55512038 | -0.582721585 | 0.58366272  | -0.998387535 | 0.318091476 | 0.48988389  |
| ENSG00000272273 | 34.54916884 | 0.197423351  | 0.303345422 | 0.650820275  | 0.515162511 | 0.670852674 |
| ENSG00000272293 | 16.41742117 | 0.763514172  | 0.443446136 | 1.721774326  | 0.085110407 | 0.18526978  |
| ENSG00000272316 | 9.915147826 | 0.274325507  | 0.541264211 | 0.506823657  | 0.612278556 | 0.747774297 |
| ENSG00000272325 | 484.0695224 | 0.0254928    | 0.094380232 | 0.270107407  | 0.787077624 | 0.872399068 |
| ENSG00000272333 | 747.2224334 | 0.119811346  | 0.081362613 | 1.472560205  | 0.140869662 | 0.272074267 |
| ENSG00000272335 | 32.92663685 | -0.966376209 | 0.314260776 | -3.075077395 | 0.002104479 | 0.008514292 |
| ENSG00000272338 | 23.66245395 | -0.348256846 | 0.370610461 | -0.939684339 | 0.347379501 | 0.519221095 |
| ENSG00000272374 | 19.1487239  | -0.618717244 | 0.418176652 | -1.479559513 | 0.138990838 | 0.269606605 |
| ENSG00000272391 | 595.8044559 | 0.068178292  | 0.087925292 | 0.775411607  | 0.438096479 | 0.603564264 |
| ENSG00000272405 | 155.4043661 | -0.676063057 | 0.149947315 | -4.508670634 | 6.52E-06    | 4.86E-05    |
| ENSG00000272434 | 8.588839496 | 0.6608495    | 0.599471219 | 1.102387369  | 0.270293301 | 0.43772308  |
| ENSG00000272462 | 9.432364679 | 0.057196081  | 0.566472923 | 0.100968782  | 0.919575242 | 0.955843823 |
| ENSG00000272476 | 9.73847031  | 0.321971067  | 0.57801292  | 0.557030917  | 0.577506305 | 0.721215423 |
| ENSG00000272491 | 9.732879868 | 0.548932403  | 0.549054073 | 0.999778402  | 0.31741776  | 0.489168105 |
| ENSG00000272512 | 22.02560785 | -0.674513402 | 0.405287641 | -1.664283174 | 0.096055853 | 0.203299167 |
| ENSG00000272518 | 23.95558276 | -0.874564127 | 0.379855034 | -2.302362875 | 0.021314717 | 0.060842883 |
| ENSG00000272533 | 26.00746002 | -0.700128362 | 0.348038021 | -2.011643328 | 0.044257549 | 0.11079768  |
| ENSG00000272599 | 16.97064209 | -0.150116369 | 0.430909827 | -0.348370726 | 0.727561785 | 0.831595187 |
| ENSG00000272604 | 10.04080756 | 0.490984257  | 0.539664037 | 0.909796139  | 0.362930031 | 0.533886077 |
| ENSG00000272610 | 22.1650684  | -0.672613647 | 0.3777839   | -1.780419035 | 0.075007409 | 0.167455352 |
| ENSG00000272631 | 23.51601579 | 0.141435746  | 0.356927071 | 0.396259509  | 0.691913594 | 0.806113483 |
| ENSG00000272636 | 44.57540118 | -0.729355222 | 0.26998262  | -2.701489533 | 0.006902965 | 0.023501201 |
| ENSG00000272674 | 12.68850127 | 2.888248028  | 0.615307338 | 4.693992497  | 2.68E-06    | 2.18E-05    |
| ENSG00000272686 | 10.52563845 | 0.285519355  | 0.545738195 | 0.523180084  | 0.600848939 | 0.739194697 |
| ENSG00000272688 | 21.5449292  | -0.442537214 | 0.370433612 | -1.19464649  | 0.232225177 | 0.392122499 |
| ENSG00000272690 | 13.71034933 | -1.643170823 | 0.504114145 | -3.25952136  | 0.001116004 | 0.004948392 |
| ENSG00000272701 | 10.0281585  | 0.079098283  | 0.566990444 | 0.139505495  | 0.889050714 | 0.93933866  |
| ENSG00000272711 | 44.7564361  | -0.200631098 | 0.268644034 | -0.746828787 | 0.455166916 | 0.618887782 |
| ENSG00000272758 | 19.1941692  | 0.326996051  | 0.397991821 | 0.821615003  | 0.411296048 | 0.579707608 |
| ENSG00000272763 | 54.5589654  | -0.083031824 | 0.260440619 | -0.318812879 | 0.749868411 | 0.848168256 |
| ENSG00000272767 | 50.01730185 | -2.707559837 | 0.315260092 | -8.58833677  | 8.82E-18    | 2.58E-16    |
| ENSG00000272808 | 16.67002493 | -0.138059446 | 0.424214096 | -0.325447569 | 0.744842358 | 0.844210781 |
| ENSG00000272817 | 11.84432826 | -0.247719487 | 0.500811512 | -0.494636169 | 0.620856966 | 0.753970589 |
| ENSG00000272831 | 15.80718424 | -0.098064603 | 0.429139026 | -0.228514764 | 0.81924608  | 0.893395096 |
| ENSG00000272841 | 17.4204507  | 0.720638374  | 0.411922077 | 1.749453146  | 0.080212721 | 0.176883531 |
| ENSG00000272870 | 8.741552941 | 1.241686393  | 0.621865217 | 1.996713048  | 0.045856364 | 0.113951132 |
| ENSG00000272871 | 8.555620265 | 0.426128168  | 0.582917661 | 0.731026346  | 0.464763061 | 0.627441299 |
| ENSG00000272886 | 625.4593735 | -0.016491772 | 0.084454993 | -0.195272908 | 0.845179305 | 0.910377555 |
| ENSG00000272888 | 204.1604537 | -0.024563143 | 0.130661434 | -0.187990769 | 0.850883887 | 0.914488597 |
| ENSG00000272899 | 15.48516637 | 0.476825607  | 0.449999968 | 1.059612536  | 0.289320908 | 0.459478891 |
| ENSG00000272918 | 21.06868858 | 0.252804679  | 0.387696993 | 0.652067679  | 0.514357513 | 0.670177163 |
| ENSG00000272983 | 31.69520445 | -0.147299479 | 0.326714459 | -0.450850811 | 0.652097077 | 0.776439474 |
| ENSG00000272994 | 26.81960178 | -0.211824319 | 0.33764205  | -0.627363561 | 0.530420948 | 0.68262236  |
| ENSG00000273014 | 14.31267829 | -1.271006374 | 0.484779371 | -2.621824384 | 0.008746049 | 0.028825843 |
| ENSG00000273015 | 73.13526967 | 0.365111398  | 0.212399348 | 1.718985499  | 0.085617012 | 0.186128115 |
| ENSG00000273032 | 11.05890894 | -0.435472013 | 0.52208059  | -0.834108797 | 0.404219678 | 0.57241129  |
| ENSG00000273033 | 40.8692638  | -0.661732878 | 0.292100318 | -2.26543019  | 0.023486293 | 0.065785038 |

|                 |             |              |             |              |             |             |
|-----------------|-------------|--------------|-------------|--------------|-------------|-------------|
| ENSG00000273058 | 26.81445952 | -0.252051414 | 0.357389362 | -0.705257182 | 0.480650201 | 0.641064696 |
| ENSG00000273061 | 14.89654635 | 0.975422187  | 0.451311014 | 2.161308184  | 0.030671541 | 0.082012793 |
| ENSG00000273066 | 31.19323439 | 0.830252367  | 0.345111579 | 2.405750541  | 0.016139281 | 0.048441983 |
| ENSG00000273080 | 10.35412906 | 0.034224484  | 0.565727072 | 0.060496457  | 0.951760237 | 0.973475269 |
| ENSG00000273084 | 24.70062449 | -1.45574655  | 0.392822967 | -3.70585906  | 0.000210675 | 0.001122244 |
| ENSG00000273117 | 12.96762354 | 0.459766485  | 0.481816769 | 0.954235125  | 0.339964639 | 0.511717865 |
| ENSG00000273136 | 14.59784479 | 0.871220012  | 0.468025664 | 1.861479144  | 0.062676543 | 0.145788608 |
| ENSG00000273142 | 42.6310247  | 0.040481166  | 0.30709486  | 0.131819745  | 0.895126869 | 0.943073102 |
| ENSG00000273145 | 18.99556029 | 0.004388613  | 0.412612996 | 0.010636148  | 0.991513741 | 0.995624671 |
| ENSG00000273156 | 18.98477038 | -0.729811174 | 0.416087411 | -1.753985231 | 0.079433038 | 0.175467193 |
| ENSG00000273162 | 11.21681571 | -1.68456616  | 0.566178094 | -2.975329099 | 0.002926744 | 0.011297601 |
| ENSG00000273173 | 7.38854845  | 0.208238304  | 0.646065556 | 0.322317607  | 0.747212096 | 0.846027998 |
| ENSG00000273175 | 14.52955525 | 0.348086232  | 0.519243075 | 0.67037241   | 0.502620418 | 0.660644616 |
| ENSG00000273199 | 8.277785914 | -1.062752591 | 0.640450144 | -1.659383794 | 0.09703848  | 0.204731079 |
| ENSG00000273203 | 35.53726315 | -0.214822817 | 0.323671143 | -0.663707041 | 0.506877832 | 0.664065744 |
| ENSG00000273230 | 12.55139207 | -0.78437185  | 0.494515837 | -1.586141012 | 0.112707325 | 0.230250116 |
| ENSG00000273247 | 37.20808877 | 0.41317205   | 0.288771637 | 1.430791659  | 0.152489934 | 0.288721675 |
| ENSG00000273270 | 19.99198333 | -0.323941347 | 0.388347591 | -0.8341531   | 0.404194716 | 0.57241129  |
| ENSG00000273271 | 8.282686191 | 0.038255455  | 0.593729708 | 0.064432442  | 0.948625899 | 0.971432914 |
| ENSG00000273274 | 9.893314479 | -0.520852036 | 0.550152441 | -0.946741297 | 0.343770621 | 0.515604085 |
| ENSG00000273297 | 20.17833908 | -0.727863656 | 0.420509862 | -1.730907458 | 0.083468271 | 0.182686009 |
| ENSG00000273306 | 18.73081141 | 0.136014872  | 0.41914699  | 0.324503993  | 0.7455565   | 0.844855772 |
| ENSG00000273311 | 23.46439776 | -0.086734165 | 0.357928657 | -0.242322493 | 0.808530286 | 0.886947088 |
| ENSG00000273314 | 11.10686572 | 0.429573669  | 0.560879582 | 0.765892863  | 0.443740053 | 0.608593685 |
| ENSG00000273320 | 11.38592383 | 0.672096526  | 0.504687921 | 1.331707174  | 0.182956431 | 0.330035827 |
| ENSG00000273329 | 95.99814992 | -0.073160252 | 0.185581022 | -0.3942227   | 0.693416627 | 0.807174069 |
| ENSG00000273338 | 64.00431073 | -0.057064804 | 0.245938155 | -0.232029079 | 0.816515428 | 0.892216525 |
| ENSG00000273344 | 81.90004919 | 0.5405219    | 0.198977274 | 2.716500678  | 0.006597606 | 0.022626116 |
| ENSG00000273373 | 42.18675448 | -0.395404165 | 0.270379463 | -1.462404578 | 0.143630376 | 0.276039935 |
| ENSG00000273382 | 10.74313264 | -0.444625345 | 0.541914129 | -0.820471955 | 0.411947111 | 0.58028691  |
| ENSG00000273391 | 13.01322194 | 0.612575857  | 0.496375774 | 1.234097008  | 0.217166758 | 0.37397294  |
| ENSG00000273419 | 11.48564417 | -1.02818655  | 0.539840083 | -1.904613204 | 0.056830369 | 0.134801789 |
| ENSG00000273442 | 9.127302817 | -0.936854    | 0.607352197 | -1.542521793 | 0.122946846 | 0.246578291 |
| ENSG00000273451 | 8.878944408 | -1.030544745 | 0.59366077  | -1.735915185 | 0.082578832 | 0.181021358 |
| ENSG00000273559 | 184.2452399 | 0.099676133  | 0.150385691 | 0.662803304  | 0.507456537 | 0.664432322 |
| ENSG00000273576 | 11.50033704 | -0.666871355 | 0.510934537 | -1.305199211 | 0.191825023 | 0.342028113 |
| ENSG00000273599 | 13.47144892 | -0.677018822 | 0.479099367 | -1.413107317 | 0.157624172 | 0.295771673 |
| ENSG00000273604 | 254.1066843 | -0.394913066 | 0.126289149 | -3.127054602 | 0.001765671 | 0.007348855 |
| ENSG00000273611 | 110.7738426 | 0.081654573  | 0.169846442 | 0.480755277  | 0.63069044  | 0.760912875 |
| ENSG00000273619 | 15.18817188 | -0.154824983 | 0.444981335 | -0.347935903 | 0.727888321 | 0.83181315  |
| ENSG00000273691 | 16.12762054 | 0.097543683  | 0.443871876 | 0.219756393  | 0.826060882 | 0.898326021 |
| ENSG00000273702 | 23.11832986 | 0.401427658  | 0.37767105  | 1.062902908  | 0.287825984 | 0.457829419 |
| ENSG00000273703 | 1957.477409 | -1.030902164 | 0.071412061 | -14.43596718 | 3.07E-47    | 2.96E-45    |
| ENSG00000273727 | 22.93180833 | 0.468934298  | 0.359202052 | 1.305488916  | 0.191726419 | 0.341947817 |
| ENSG00000273729 | 9.9393239   | -0.444266917 | 0.551815452 | -0.805100537 | 0.420761666 | 0.588373639 |
| ENSG00000273748 | 18.6182492  | -0.050117072 | 0.397556715 | -0.126062697 | 0.899682295 | 0.945875099 |
| ENSG00000273749 | 1209.217688 | 0.130977611  | 0.07532411  | 1.738853745  | 0.082060492 | 0.18016626  |
| ENSG00000273759 | 15.09437228 | 0.083123104  | 0.446493819 | 0.186168543  | 0.852312592 | 0.915251049 |
| ENSG00000273802 | 432.3413137 | -0.116579747 | 0.103507081 | -1.126297312 | 0.260039695 | 0.426128978 |
| ENSG00000273805 | 10.21296032 | -0.60427501  | 0.547063434 | -1.104579419 | 0.269341873 | 0.43653459  |

|                 |             |              |             |              |             |             |
|-----------------|-------------|--------------|-------------|--------------|-------------|-------------|
| ENSG00000273820 | 62.13022803 | -0.173664817 | 0.231016671 | -0.75174149  | 0.452206534 | 0.616965713 |
| ENSG00000273841 | 412.8571113 | 0.001336436  | 0.101968796 | 0.013106323  | 0.989542966 | 0.994744093 |
| ENSG00000273899 | 29.49684719 | -0.056077186 | 0.324833501 | -0.172633628 | 0.862939417 | 0.922223828 |
| ENSG00000273983 | 483.1010258 | -0.787526528 | 0.100346983 | -7.848033913 | 4.23E-15    | 1.02E-13    |
| ENSG00000274015 | 8.85452251  | -0.670318639 | 0.59204125  | -1.132216107 | 0.25754359  | 0.423322585 |
| ENSG00000274020 | 16.34183358 | -0.797749626 | 0.44160052  | -1.806496122 | 0.070840879 | 0.160500295 |
| ENSG00000274021 | 8.829309506 | -1.286465537 | 0.614214391 | -2.09448941  | 0.036216405 | 0.094087636 |
| ENSG00000274023 | 11.16169625 | -1.200863466 | 0.566198179 | -2.120924282 | 0.033928175 | 0.089115384 |
| ENSG00000274070 | 158.4310783 | -1.253592304 | 0.150888662 | -8.308061641 | 9.73E-17    | 2.64E-15    |
| ENSG00000274080 | 13.90885849 | -0.058732753 | 0.460013931 | -0.127676032 | 0.898405358 | 0.944886199 |
| ENSG00000274124 | 9.113509405 | -0.608627782 | 0.586170212 | -1.03831237  | 0.299124652 | 0.469527766 |
| ENSG00000274180 | 59.80551712 | -0.155268009 | 0.224813547 | -0.690652368 | 0.489784029 | 0.649485156 |
| ENSG00000274210 | 169.4518606 | 1.041249937  | 0.152369493 | 6.833716632  | 8.27E-12    | 1.47E-10    |
| ENSG00000274211 | 289.202099  | -0.180099396 | 0.120332507 | -1.49668116  | 0.134476241 | 0.263163521 |
| ENSG00000274213 | 10.25290318 | 0.802596335  | 0.554656343 | 1.447015516  | 0.147892578 | 0.282031909 |
| ENSG00000274238 | 7.664993677 | -2.858422911 | 0.818916045 | -3.490495673 | 0.000482125 | 0.002345019 |
| ENSG00000274253 | 29.47508805 | -2.075303887 | 0.370928936 | -5.594882695 | 2.21E-08    | 2.59E-07    |
| ENSG00000274270 | 8.989144403 | -0.037468061 | 0.569590587 | -0.065780688 | 0.947552432 | 0.970914655 |
| ENSG00000274276 | 16.4556424  | -3.015105478 | 0.586590587 | -5.140050907 | 2.75E-07    | 2.70E-06    |
| ENSG00000274290 | 580.1388754 | -0.058921206 | 0.092963492 | -0.633810162 | 0.52620472  | 0.679374789 |
| ENSG00000274292 | 17.72887359 | -0.430654096 | 0.424609527 | -1.014235595 | 0.310470348 | 0.481844765 |
| ENSG00000274308 | 20.73062393 | -0.389340839 | 0.382249373 | -1.018551935 | 0.308415733 | 0.479662954 |
| ENSG00000274317 | 6.047975965 | -4.879416246 | 1.307839696 | -3.7308978   | 0.000190799 | 0.001025015 |
| ENSG00000274349 | 15.21852526 | 0.399501605  | 0.470055591 | 0.84990289   | 0.395379079 | 0.563217718 |
| ENSG00000274383 | 56.82502408 | 0.481386743  | 0.259420569 | 1.855622875  | 0.063507331 | 0.147330714 |
| ENSG00000274422 | 20.37104495 | -0.348240599 | 0.389611023 | -0.893816084 | 0.371420302 | 0.54217406  |
| ENSG00000274425 | 30.70948005 | -0.334916773 | 0.319164399 | -1.049355048 | 0.294014739 | 0.464360809 |
| ENSG00000274428 | 224.2656328 | 0.165255525  | 0.136440729 | 1.211189111  | 0.225822935 | 0.384268294 |
| ENSG00000274523 | 449.6434085 | -0.054519401 | 0.096362192 | -0.565775851 | 0.571546164 | 0.716690513 |
| ENSG00000274565 | 11.38743059 | 0.434200177  | 0.539442992 | 0.804904657  | 0.420874701 | 0.588378475 |
| ENSG00000274605 | 42.09712144 | -0.024584693 | 0.265587095 | -0.092567346 | 0.926247286 | 0.959654494 |
| ENSG00000274641 | 673.2631881 | -0.373441386 | 0.098216677 | -3.802219737 | 0.000143405 | 0.000797157 |
| ENSG00000274677 | 7.400469144 | -0.630397433 | 0.633034381 | -0.995834432 | 0.319330597 | 0.490931039 |
| ENSG00000274750 | 174.8830306 | 0.09391555   | 0.142143023 | 0.660711645  | 0.508797254 | 0.665497779 |
| ENSG00000274828 | 10.29548639 | -0.025938791 | 0.538032962 | -0.048210412 | 0.961548552 | 0.979684997 |
| ENSG00000274925 | 26.25598361 | -1.046636454 | 0.350884908 | -2.982848303 | 0.002855795 | 0.01107547  |
| ENSG00000274964 | 10.35155746 | -0.834952083 | 0.553472495 | -1.508570146 | 0.131408668 | 0.258819064 |
| ENSG00000274997 | 730.9156848 | -0.182266234 | 0.096966513 | -1.879682254 | 0.060151396 | 0.141106656 |
| ENSG00000275004 | 115.9604447 | -0.176514326 | 0.169850848 | -1.039231348 | 0.298697155 | 0.469182736 |
| ENSG00000275023 | 908.7277829 | 0.010120025  | 0.076824748 | 0.131728716  | 0.895198871 | 0.943073102 |
| ENSG00000275029 | 29.05709507 | -0.353009613 | 0.325790684 | -1.083547291 | 0.278565572 | 0.447405738 |
| ENSG00000275038 | 17.94717401 | -5.602194843 | 1.053891976 | -5.31572018  | 1.06E-07    | 1.11E-06    |
| ENSG00000275052 | 1058.317559 | 0.281448158  | 0.076461378 | 3.680919242  | 0.000232395 | 0.001222887 |
| ENSG00000275064 | 6.481773448 | -5.976879128 | 1.297813901 | -4.605343742 | 4.12E-06    | 3.20E-05    |
| ENSG00000275066 | 284.1700641 | -0.25421816  | 0.119058768 | -2.135232569 | 0.032742018 | 0.086501246 |
| ENSG00000275074 | 15.34325802 | 0.179052608  | 0.44300044  | 0.404181558  | 0.686079214 | 0.801843308 |
| ENSG00000275111 | 38.32914698 | 0.34559653   | 0.282478213 | 1.2234449    | 0.221161703 | 0.378906994 |
| ENSG00000275131 | 14.03209824 | 0.611439334  | 0.480643403 | 1.272126758  | 0.203328085 | 0.356350545 |
| ENSG00000275180 | 13.71152401 | -0.442978594 | 0.469392641 | -0.943727181 | 0.345309081 | 0.517089495 |
| ENSG00000275183 | 30.1878444  | 2.388139293  | 0.370915088 | 6.438506731  | 1.21E-10    | 1.89E-09    |

|                 |             |              |             |              |             |             |
|-----------------|-------------|--------------|-------------|--------------|-------------|-------------|
| ENSG00000275221 | 199.9727412 | -0.253856949 | 0.136433651 | -1.86066228  | 0.062791884 | 0.145936067 |
| ENSG00000275291 | 27.04803469 | -0.319467651 | 0.336019908 | -0.950740249 | 0.341736251 | 0.513683158 |
| ENSG00000275318 | 16.11006014 | -0.053767508 | 0.42316282  | -0.127061041 | 0.898892087 | 0.94532733  |
| ENSG00000275342 | 54.95529847 | -0.091554237 | 0.237320424 | -0.385783218 | 0.699657225 | 0.811562424 |
| ENSG00000275395 | 18.7150919  | -0.950719834 | 0.414897777 | -2.291455598 | 0.021937077 | 0.062263317 |
| ENSG00000275401 | 8.901364522 | -0.828250577 | 0.681105942 | -1.21603781  | 0.223970519 | 0.382273862 |
| ENSG00000275468 | 22.43510874 | -0.447667422 | 0.382213642 | -1.171249199 | 0.241498625 | 0.404089479 |
| ENSG00000275481 | 24.04499368 | -1.097166964 | 0.371085554 | -2.956641539 | 0.003110095 | 0.011907195 |
| ENSG00000275494 | 6.935059484 | -0.712869514 | 0.687302906 | -1.037198457 | 0.299643377 | 0.470079352 |
| ENSG00000275591 | 33.13076783 | -2.279035897 | 0.372160919 | -6.123791572 | 9.14E-10    | 1.28E-08    |
| ENSG00000275632 | 50.47590014 | -0.503555086 | 0.253520578 | -1.986249359 | 0.047005643 | 0.116186567 |
| ENSG00000275700 | 636.8371566 | 0.348277059  | 0.091125036 | 3.821968964  | 0.00013239  | 0.000742094 |
| ENSG00000275713 | 740.5242597 | -0.360540978 | 0.095738751 | -3.76588346  | 0.000165961 | 0.000905342 |
| ENSG00000275719 | 11.19504959 | -0.606633349 | 0.530939312 | -1.142566271 | 0.253218716 | 0.417974537 |
| ENSG00000275734 | 11.10165698 | -0.476425957 | 0.528943314 | -0.900712693 | 0.367741098 | 0.539135055 |
| ENSG00000275764 | 16.01346972 | 0.326429389  | 0.44845797  | 0.727892936  | 0.466679128 | 0.628895314 |
| ENSG00000275832 | 83.47642218 | 0.214982536  | 0.192604978 | 1.116183691  | 0.264343514 | 0.431019541 |
| ENSG00000275835 | 261.7589549 | -0.118374664 | 0.118694149 | -0.997308339 | 0.318614867 | 0.490203497 |
| ENSG00000275888 | 9.558571123 | 1.081788234  | 0.58288924  | 1.855907023  | 0.063466812 | 0.1473097   |
| ENSG00000275895 | 11.3587202  | 0.854782243  | 0.520113848 | 1.643452192  | 0.100289409 | 0.210198391 |
| ENSG00000276007 | 8.970283179 | -1.559878736 | 0.630759823 | -2.473015368 | 0.013397838 | 0.041389803 |
| ENSG00000276023 | 146.7966494 | 0.334173165  | 0.154575988 | 2.161869834  | 0.030628211 | 0.081933818 |
| ENSG00000276043 | 665.5702175 | 0.041619066  | 0.085431488 | 0.487163067  | 0.626142776 | 0.757381067 |
| ENSG00000276045 | 176.5945402 | -0.240247319 | 0.142770475 | -1.682752116 | 0.092423088 | 0.197365023 |
| ENSG00000276047 | 13.93080356 | -0.424250169 | 0.469780861 | -0.903080998 | 0.366482908 | 0.537817114 |
| ENSG00000276168 | 85562.07874 | -0.801924023 | 0.17383479  | -4.613138851 | 3.97E-06    | 3.10E-05    |
| ENSG00000276180 | 8.28654158  | -1.538189723 | 0.656214882 | -2.344033587 | 0.019076453 | 0.055527683 |
| ENSG00000276234 | 102.4052412 | -0.05093166  | 0.18857654  | -0.270084814 | 0.787095005 | 0.872399068 |
| ENSG00000276248 | 16.67433881 | -0.284452191 | 0.423864332 | -0.671092541 | 0.502161578 | 0.660354498 |
| ENSG00000276255 | 7.996625092 | -1.331071457 | 0.645906319 | -2.06078098  | 0.03932394  | 0.100415085 |
| ENSG00000276256 | 11.91435295 | -0.78905011  | 0.520997631 | -1.51449846  | 0.129899464 | 0.256489013 |
| ENSG00000276293 | 510.564506  | -0.011195694 | 0.091965785 | -0.1217376   | 0.903106834 | 0.947702203 |
| ENSG00000276334 | 22.59723917 | -0.335871999 | 0.367593187 | -0.913705725 | 0.360871495 | 0.532058728 |
| ENSG00000276368 | 566.6648242 | 0.059875797  | 0.559166742 | 0.107080398  | 0.914725198 | 0.953830969 |
| ENSG00000276399 | 29.55968421 | 1.120132259  | 0.330684181 | 3.387317332  | 0.000705797 | 0.003295988 |
| ENSG00000276434 | 10.64047474 | 0.011006602  | 0.527425823 | 0.020868531  | 0.983350529 | 0.991939727 |
| ENSG00000276449 | 10.91854706 | 0.65882003   | 0.542216521 | 1.215049717  | 0.22434713  | 0.382637705 |
| ENSG00000276517 | 48.59271584 | -0.433737787 | 0.249040474 | -1.741635726 | 0.081572206 | 0.179402658 |
| ENSG00000276529 | 22.39219242 | 0.132184065  | 0.377022753 | 0.350599702  | 0.72588868  | 0.830406246 |
| ENSG00000276542 | 10.03105778 | -4.189144961 | 0.952770523 | -4.3968037   | 1.10E-05    | 7.81E-05    |
| ENSG00000276545 | 13.41244066 | -0.36704224  | 0.471547066 | -0.778378801 | 0.436345732 | 0.602452182 |
| ENSG00000276564 | 12.80901024 | 0.417165826  | 0.501206756 | 0.832322831  | 0.405226747 | 0.573465658 |
| ENSG00000276570 | 10.54645864 | -0.170783433 | 0.560392888 | -0.304756603 | 0.760551536 | 0.855365062 |
| ENSG00000276644 | 9.734643969 | -2.781758677 | 0.716962226 | -3.879923623 | 0.000104489 | 0.000599821 |
| ENSG00000276649 | 26.9419389  | -0.611504798 | 0.348046686 | -1.756961987 | 0.078924289 | 0.174617969 |
| ENSG00000276672 | 81.83403324 | -0.677419707 | 0.198587996 | -3.411181545 | 0.00064682  | 0.003042827 |
| ENSG00000276728 | 17.49546821 | 0.537195862  | 0.442209483 | 1.214799506  | 0.224442569 | 0.382754009 |
| ENSG00000276791 | 9.333432479 | -0.098345962 | 0.560216667 | -0.175549869 | 0.86064759  | 0.92075527  |
| ENSG00000276966 | 877.3333323 | -0.392902871 | 0.10264449  | -3.827802843 | 0.000129292 | 0.000725307 |
| ENSG00000277027 | 85571.39478 | -0.361054414 | 0.067097498 | -5.381041374 | 7.41E-08    | 7.93E-07    |

|                 |             |              |             |              |             |             |
|-----------------|-------------|--------------|-------------|--------------|-------------|-------------|
| ENSG00000277075 | 1583.385323 | -0.12630939  | 0.073664383 | -1.714660261 | 0.086407533 | 0.187453484 |
| ENSG00000277149 | 31.40649563 | -0.435178612 | 0.320659336 | -1.357136884 | 0.174737721 | 0.319144554 |
| ENSG00000277151 | 25.32657094 | -0.316466393 | 0.350180278 | -0.903724203 | 0.366141662 | 0.537428624 |
| ENSG00000277157 | 445.5834223 | 0.129337218  | 0.115721256 | 1.117661725  | 0.263711496 | 0.43023872  |
| ENSG00000277161 | 74.36468647 | -0.572107984 | 0.209563584 | -2.729997137 | 0.006333488 | 0.021826914 |
| ENSG00000277182 | 11.95660523 | -0.766238148 | 0.507093408 | -1.511039458 | 0.130778398 | 0.257830759 |
| ENSG00000277224 | 1182.57524  | -0.376991487 | 0.080140832 | -4.704112465 | 2.55E-06    | 2.08E-05    |
| ENSG00000277258 | 866.2465074 | -0.236540182 | 0.0783959   | -3.017251928 | 0.002550777 | 0.010057529 |
| ENSG00000277283 | 13.53150656 | -0.629104655 | 0.488961538 | -1.286613785 | 0.198228936 | 0.349902221 |
| ENSG00000277287 | 12.4385348  | -0.624372539 | 0.510294534 | -1.223553258 | 0.221120802 | 0.378906994 |
| ENSG00000277363 | 145.1252133 | -1.279238173 | 0.162219385 | -7.885852673 | 3.12E-15    | 7.67E-14    |
| ENSG00000277443 | 229.3874166 | 0.56555133   | 0.122234396 | 4.626777317  | 3.71E-06    | 2.93E-05    |
| ENSG00000277449 | 11.09953431 | -0.747325263 | 0.52907512  | -1.412512582 | 0.157799089 | 0.295981279 |
| ENSG00000277462 | 14.58201854 | -1.119709717 | 0.468747854 | -2.388724997 | 0.016906952 | 0.050316093 |
| ENSG00000277476 | 29.28597738 | 0.054102032  | 0.341144033 | 0.158589998  | 0.873991909 | 0.93020483  |
| ENSG00000277534 | 13.60644473 | 0.757005831  | 0.481269965 | 1.572933874  | 0.11573413  | 0.234692844 |
| ENSG00000277589 | 10.33237633 | 0.127750487  | 0.538080237 | 0.237419028  | 0.81233173  | 0.889524775 |
| ENSG00000277610 | 22.03484745 | 0.314156752  | 0.373800235 | 0.840440221  | 0.400661606 | 0.568781564 |
| ENSG00000277687 | 10.03204563 | -0.33031614  | 0.541174613 | -0.610368876 | 0.541617481 | 0.691142874 |
| ENSG00000277693 | 128.7353491 | 0.223087409  | 0.167650836 | 1.330666844  | 0.183298657 | 0.330568268 |
| ENSG00000277738 | 31.37431465 | -2.634998708 | 0.406476722 | -6.48253286  | 9.02E-11    | 1.44E-09    |
| ENSG00000277775 | 289.8113453 | -0.373284825 | 0.137820908 | -2.708477484 | 0.00675927  | 0.023095953 |
| ENSG00000277791 | 656.0705495 | 0.620818144  | 0.092632235 | 6.701966574  | 2.06E-11    | 3.51E-10    |
| ENSG00000277879 | 15.77348123 | 0.059712035  | 0.436850797 | 0.136687482  | 0.891277825 | 0.94027635  |
| ENSG00000277918 | 340.3667924 | -0.466242582 | 0.124918422 | -3.732376482 | 0.000189682 | 0.001021451 |
| ENSG00000277938 | 10.49171699 | -0.183126805 | 0.542231586 | -0.337728029 | 0.73556815  | 0.837387617 |
| ENSG00000277945 | 8.718936628 | -1.566604638 | 0.682685193 | -2.294768737 | 0.021746381 | 0.06179879  |
| ENSG00000277959 | 11.63826565 | -0.248079589 | 0.503134345 | -0.493068285 | 0.621964339 | 0.754793354 |
| ENSG00000277969 | 8.261112538 | -0.347301797 | 0.622610854 | -0.557815198 | 0.576970584 | 0.720930955 |
| ENSG00000277972 | 156.1420613 | 0.055113798  | 0.1456793   | 0.378322785  | 0.705190821 | 0.815025133 |
| ENSG00000278000 | 24.88994123 | -0.240650076 | 0.352866406 | -0.681986361 | 0.495247575 | 0.654135261 |
| ENSG00000278023 | 11.8076509  | -0.683338769 | 0.505820987 | -1.350949816 | 0.176711509 | 0.321787213 |
| ENSG00000278053 | 326.4943386 | 0.08727504   | 0.119406929 | 0.730904318  | 0.464837598 | 0.62748162  |
| ENSG00000278099 | 9.008202188 | 0.562605167  | 0.582951969 | 0.96509695   | 0.334496255 | 0.506275374 |
| ENSG00000278112 | 17.11960878 | 0.62183709   | 0.413912657 | 1.502338912  | 0.133009604 | 0.261298813 |
| ENSG00000278129 | 184.2014706 | 0.019929411  | 0.135480808 | 0.147101358  | 0.883052018 | 0.935532973 |
| ENSG00000278133 | 33.0482699  | -0.459320206 | 0.309455261 | -1.484286305 | 0.137732982 | 0.267635246 |
| ENSG00000278175 | 22.9004107  | -0.047962218 | 0.364117879 | -0.131721678 | 0.895204438 | 0.943073102 |
| ENSG00000278192 | 8.463783573 | 0.123483863  | 0.603824213 | 0.204502999  | 0.837960449 | 0.905456617 |
| ENSG00000278200 | 11.64879186 | 0.061189486  | 0.499299626 | 0.122550636  | 0.902462947 | 0.947258155 |
| ENSG00000278259 | 706.2083244 | -0.039698148 | 0.082359603 | -0.482009946 | 0.629798881 | 0.760033065 |
| ENSG00000278291 | 54.5009027  | 0.408572866  | 0.242094734 | 1.687656972  | 0.091477096 | 0.195910774 |
| ENSG00000278311 | 508.9750553 | -0.12740229  | 0.08998     | -1.415895645 | 0.15680606  | 0.294630113 |
| ENSG00000278376 | 9.919713697 | 0.314030525  | 0.544647922 | 0.576575275  | 0.564226406 | 0.710326606 |
| ENSG00000278384 | 9.918722272 | -0.015140195 | 0.553451909 | -0.027355936 | 0.978175843 | 0.988805129 |
| ENSG00000278390 | 11.19105785 | -1.397886303 | 0.575469543 | -2.429123    | 0.015135397 | 0.045889686 |
| ENSG00000278463 | 289.9811339 | 0.315998741  | 0.352777223 | 0.895745871  | 0.370388505 | 0.541536387 |
| ENSG00000278535 | 154.0442478 | 0.191088138  | 0.157096066 | 1.216377616  | 0.223841107 | 0.382164648 |
| ENSG00000278540 | 2722.667849 | -0.345311634 | 0.057948064 | -5.958984876 | 2.54E-09    | 3.35E-08    |
| ENSG00000278576 | 20.62333404 | -0.257669607 | 0.383987013 | -0.671037296 | 0.50219677  | 0.660354498 |

|                 |             |              |             |              |             |             |
|-----------------|-------------|--------------|-------------|--------------|-------------|-------------|
| ENSG00000278588 | 482.9005448 | -0.391215188 | 0.096907543 | -4.036994189 | 5.41E-05    | 0.000329653 |
| ENSG00000278600 | 30.37253865 | 0.080316134  | 0.330302895 | 0.243159038  | 0.807882198 | 0.886465967 |
| ENSG00000278619 | 70.52123599 | 0.051475623  | 0.210697077 | 0.244311043  | 0.806989931 | 0.8858602   |
| ENSG00000278662 | 24.20905731 | 0.490231834  | 0.383715108 | 1.277593253  | 0.201392881 | 0.353805345 |
| ENSG00000278677 | 203.3307771 | -0.503802101 | 0.145477696 | -3.46308826  | 0.000534013 | 0.002569813 |
| ENSG00000278705 | 217.4984294 | -0.014738786 | 0.133115481 | -0.110721802 | 0.911836957 | 0.952735327 |
| ENSG00000278730 | 204.5724277 | -0.201422095 | 0.140661279 | -1.431965476 | 0.152153702 | 0.288402768 |
| ENSG00000278768 | 105.2816029 | -0.310406867 | 0.177673854 | -1.747059906 | 0.080626947 | 0.177601808 |
| ENSG00000278771 | 9407.633928 | -1.006794124 | 0.25275106  | -3.983342837 | 6.80E-05    | 0.000406702 |
| ENSG00000278784 | 7.807275574 | -1.084301811 | 0.633823794 | -1.710730682 | 0.087130841 | 0.188470422 |
| ENSG00000278828 | 896.929708  | -0.416937776 | 0.090067289 | -4.629180948 | 3.67E-06    | 2.90E-05    |
| ENSG00000278834 | 17.15382282 | -0.987842182 | 0.427145906 | -2.312657494 | 0.020741478 | 0.059533212 |
| ENSG00000278845 | 223.6700754 | 0.198559757  | 0.127777065 | 1.553954592  | 0.120195248 | 0.242208986 |
| ENSG00000278861 | 7.549815091 | 0.61199221   | 0.650280882 | 0.941119794  | 0.346643473 | 0.518672866 |
| ENSG00000278864 | 15.19434648 | -0.624592619 | 0.45254112  | -1.380189757 | 0.167528227 | 0.309718114 |
| ENSG00000278873 | 20.22539126 | -1.625520804 | 0.416430477 | -3.903462627 | 9.48E-05    | 0.000548609 |
| ENSG00000278896 | 39.04710993 | -1.282582318 | 0.306832135 | -4.180078193 | 2.91E-05    | 0.000188724 |
| ENSG00000278905 | 61.3237504  | -0.774429425 | 0.246233389 | -3.145103225 | 0.001660282 | 0.006976364 |
| ENSG00000278948 | 29.3846885  | 0.152390966  | 0.315376826 | 0.483202802  | 0.628951746 | 0.759402199 |
| ENSG00000278962 | 11.4790547  | -0.155000355 | 0.524277119 | -0.29564585  | 0.767500555 | 0.860009596 |
| ENSG00000278963 | 43.73448046 | -0.254096992 | 0.291303456 | -0.872275926 | 0.383057867 | 0.552444955 |
| ENSG00000278972 | 15.38523065 | -0.360649205 | 0.468078234 | -0.77048916  | 0.441009783 | 0.606269761 |
| ENSG00000278983 | 26.12475027 | 0.63561341   | 0.343571193 | 1.850019508  | 0.064310738 | 0.148850377 |
| ENSG00000278985 | 10.45761656 | -1.673024595 | 0.582908249 | -2.870133674 | 0.004102983 | 0.015143091 |
| ENSG00000278987 | 19.54619024 | -0.744937541 | 0.412681435 | -1.805115223 | 0.071056653 | 0.160911302 |
| ENSG00000278991 | 14.45947315 | -0.339363053 | 0.451432762 | -0.751746621 | 0.452203448 | 0.616965713 |
| ENSG00000279041 | 7.819133253 | -6.246908409 | 1.277823219 | -4.888710984 | 1.01E-06    | 8.98E-06    |
| ENSG00000279059 | 42.91881301 | -0.178173455 | 0.267337408 | -0.666474085 | 0.505108123 | 0.662798113 |
| ENSG00000279069 | 18.70730406 | -0.679728487 | 0.408313471 | -1.66472217  | 0.095968198 | 0.203174872 |
| ENSG00000279077 | 9.724967851 | -0.434190843 | 0.582639263 | -0.745213841 | 0.456142457 | 0.61991199  |
| ENSG00000279078 | 27.26625284 | 0.330804752  | 0.333948215 | 0.990586975  | 0.3218873   | 0.493780814 |
| ENSG00000279088 | 48.32294958 | 0.358692822  | 0.249149417 | 1.439669522  | 0.14996092  | 0.285008936 |
| ENSG00000279089 | 19.76878078 | -0.498939573 | 0.410064094 | -1.216735578 | 0.223704838 | 0.382052506 |
| ENSG00000279092 | 46.2298661  | 0.409705311  | 0.257223432 | 1.592799329  | 0.111205216 | 0.22791066  |
| ENSG00000279133 | 127.9501828 | -0.346577015 | 0.158513931 | -2.186413609 | 0.028785359 | 0.077894035 |
| ENSG00000279138 | 15.79927017 | -0.080294756 | 0.437294247 | -0.183617226 | 0.854313749 | 0.916431867 |
| ENSG00000279145 | 15.40129609 | -0.346136626 | 0.46326171  | -0.747172967 | 0.45495916  | 0.618784985 |
| ENSG00000279166 | 48.56023237 | 0.012466433  | 0.264101167 | 0.047203248  | 0.962351239 | 0.98007307  |
| ENSG00000279170 | 117.4706112 | 0.168706013  | 0.167454443 | 1.007474092  | 0.313707002 | 0.484939172 |
| ENSG00000279175 | 35.65934542 | -0.020276508 | 0.313408787 | -0.064696679 | 0.948415507 | 0.971358017 |
| ENSG00000279207 | 33.7402084  | -0.170897366 | 0.299531585 | -0.570548731 | 0.56830558  | 0.713722708 |
| ENSG00000279233 | 12.23308995 | 0.059020118  | 0.521964353 | 0.113073082  | 0.909972616 | 0.951381168 |
| ENSG00000279236 | 16.27757659 | -0.020508925 | 0.429998495 | -0.047695342 | 0.961959046 | 0.979825424 |
| ENSG00000279253 | 17.40222113 | 0.003236964  | 0.411628014 | 0.007863808  | 0.993725653 | 0.996990519 |
| ENSG00000279281 | 17.98823246 | -0.448516632 | 0.422694192 | -1.061090122 | 0.288648946 | 0.458770449 |
| ENSG00000279342 | 53.44237778 | -0.596078092 | 0.240263442 | -2.480935455 | 0.01310381  | 0.040615449 |
| ENSG00000279347 | 28.18387782 | -0.414560034 | 0.32606393  | -1.27140722  | 0.203583815 | 0.356584244 |
| ENSG00000279348 | 59.6836005  | -1.163878424 | 0.239736102 | -4.854831685 | 1.20E-06    | 1.05E-05    |
| ENSG00000279356 | 16.68091307 | 0.448261582  | 0.425572113 | 1.053315214  | 0.292196548 | 0.462685708 |
| ENSG00000279392 | 24.19376172 | 0.4463811    | 0.350065871 | 1.275134588  | 0.202261609 | 0.354879942 |

|                 |             |              |             |              |             |             |
|-----------------|-------------|--------------|-------------|--------------|-------------|-------------|
| ENSG00000279407 | 50.1170604  | 0.357964419  | 0.265648983 | 1.347509087  | 0.177816329 | 0.323295139 |
| ENSG00000279425 | 35.77612272 | -0.430218539 | 0.30559876  | -1.407788891 | 0.159193591 | 0.297801621 |
| ENSG00000279432 | 25.40076435 | 0.035152067  | 0.346468813 | 0.101458098  | 0.919186819 | 0.955581501 |
| ENSG00000279443 | 44.24375824 | -0.272817903 | 0.265165021 | -1.028860826 | 0.303545079 | 0.474358887 |
| ENSG00000279453 | 7.564185179 | -0.200745423 | 0.637411887 | -0.314938311 | 0.752808492 | 0.850671779 |
| ENSG00000279481 | 16.51895917 | -1.034799051 | 0.44549248  | -2.322820467 | 0.020188799 | 0.058232456 |
| ENSG00000279491 | 7.965129592 | 0.142186096  | 0.616711162 | 0.230555412  | 0.81766021  | 0.892507031 |
| ENSG00000279495 | 7.637380904 | -0.488625577 | 0.64706374  | -0.755142881 | 0.450163257 | 0.61512094  |
| ENSG00000279502 | 13.53179731 | -0.528335208 | 0.503400581 | -1.049532377 | 0.293933162 | 0.464336384 |
| ENSG00000279516 | 38.31250064 | 0.167652806  | 0.282079019 | 0.594346953  | 0.55228008  | 0.699664348 |
| ENSG00000279520 | 8.903045831 | -0.154864017 | 0.637844629 | -0.242792695 | 0.808165995 | 0.886691223 |
| ENSG00000279544 | 39.05256522 | -0.5032433   | 0.304376665 | -1.653357035 | 0.098258222 | 0.206838489 |
| ENSG00000279555 | 30.80432052 | 0.348605408  | 0.322980605 | 1.079338522  | 0.280436846 | 0.44922983  |
| ENSG00000279573 | 12.76818813 | -0.474209719 | 0.509805921 | -0.930176954 | 0.352279472 | 0.523715899 |
| ENSG00000279583 | 13.0334755  | -0.057792581 | 0.5030974   | -0.114873543 | 0.908545356 | 0.95095631  |
| ENSG00000279589 | 10.79171478 | -0.97171531  | 0.552040415 | -1.760224946 | 0.078369674 | 0.173774082 |
| ENSG00000279598 | 40.88438549 | -0.670089726 | 0.278834677 | -2.403179307 | 0.016253216 | 0.048721494 |
| ENSG00000279602 | 27.15664938 | 0.495831175  | 0.34395745  | 1.441548002  | 0.149429927 | 0.284192009 |
| ENSG00000279608 | 23.09720034 | -0.347753144 | 0.372143881 | -0.934458852 | 0.350067252 | 0.522071843 |
| ENSG00000279619 | 19.31403521 | -1.351856269 | 0.425297131 | -3.178616011 | 0.0014798   | 0.006320082 |
| ENSG00000279632 | 11.35125274 | -0.806545409 | 0.575560699 | -1.401321198 | 0.161118045 | 0.300441415 |
| ENSG00000279655 | 7.50266237  | -6.18840925  | 1.284275214 | -4.818600549 | 1.45E-06    | 1.24E-05    |
| ENSG00000279659 | 72.95716206 | -1.876027343 | 0.249277005 | -7.525874044 | 5.24E-14    | 1.17E-12    |
| ENSG00000279670 | 31.06976307 | -1.322949756 | 0.336520262 | -3.931263304 | 8.45E-05    | 0.000496229 |
| ENSG00000279692 | 10.00914023 | -1.066021773 | 0.572732433 | -1.861291089 | 0.062703081 | 0.145813188 |
| ENSG00000279696 | 12.21518514 | -0.724338819 | 0.50413347  | -1.436799701 | 0.150774915 | 0.286207465 |
| ENSG00000279738 | 71.70937383 | -0.302639277 | 0.232844219 | -1.299750012 | 0.193686663 | 0.344525333 |
| ENSG00000279744 | 14.1584327  | -0.373152524 | 0.467142674 | -0.798797764 | 0.424407687 | 0.59161008  |
| ENSG00000279759 | 31.34124534 | -0.323449706 | 0.308001543 | -1.050156122 | 0.293646339 | 0.463987641 |
| ENSG00000279766 | 12.66957667 | -0.01996242  | 0.49231179  | -0.040548328 | 0.967655978 | 0.982949477 |
| ENSG00000279770 | 15.10676745 | 2.370163544  | 0.533002307 | 4.446816671  | 8.72E-06    | 6.34E-05    |
| ENSG00000279786 | 20.95480224 | -0.434395844 | 0.37986104  | -1.143565142 | 0.252804025 | 0.417437186 |
| ENSG00000279789 | 45.27790631 | 0.242475206  | 0.259465821 | 0.934516944  | 0.3500373   | 0.522071843 |
| ENSG00000279792 | 26.09559656 | -0.666610947 | 0.36708952  | -1.815935652 | 0.069380244 | 0.157929717 |
| ENSG00000279799 | 31.95580646 | -0.296338836 | 0.318883243 | -0.929302    | 0.352732599 | 0.524165716 |
| ENSG00000279801 | 15.5849574  | -1.186778435 | 0.469407583 | -2.52824726  | 0.011463359 | 0.036242584 |
| ENSG00000279812 | 20.07490309 | 0.210686185  | 0.382036774 | 0.551481427  | 0.581303695 | 0.723769988 |
| ENSG00000279821 | 18.41796601 | -0.457977444 | 0.404121234 | -1.133267459 | 0.257101953 | 0.422868358 |
| ENSG00000279838 | 28.98777103 | -0.566846932 | 0.335815203 | -1.687972809 | 0.091416449 | 0.195810743 |
| ENSG00000279852 | 16.55938432 | -0.112097449 | 0.42067894  | -0.266467935 | 0.789878851 | 0.874482048 |
| ENSG00000279880 | 15.16213853 | -0.308435965 | 0.453615422 | -0.679950349 | 0.4965359   | 0.655099069 |
| ENSG00000279891 | 18.43250663 | -1.38297709  | 0.430675735 | -3.211179497 | 0.001321913 | 0.005722316 |
| ENSG00000279917 | 8.373385473 | -1.051650066 | 0.632774547 | -1.661966447 | 0.096519502 | 0.203942456 |
| ENSG00000279970 | 15.02533543 | 0.469806513  | 0.468676795 | 1.002410442  | 0.316145401 | 0.487716314 |
| ENSG00000279977 | 15.20066913 | -0.183285255 | 0.459496322 | -0.398882965 | 0.689979442 | 0.804902039 |
| ENSG00000280010 | 11.21164609 | -0.867377783 | 0.530015784 | -1.636513119 | 0.101732242 | 0.212572927 |
| ENSG00000280028 | 7.411018858 | 0.122022171  | 0.665485073 | 0.183358238  | 0.854516941 | 0.916499922 |
| ENSG00000280046 | 7.096910658 | 0.453560589  | 0.657404793 | 0.689925892  | 0.490240792 | 0.649845466 |
| ENSG00000280063 | 11.10252236 | -0.804116432 | 0.536963662 | -1.49752486  | 0.134256742 | 0.262904084 |
| ENSG00000280069 | 25.30916142 | -0.440304085 | 0.373956371 | -1.177421003 | 0.239027511 | 0.400861921 |



|                 |             |              |             |              |             |             |
|-----------------|-------------|--------------|-------------|--------------|-------------|-------------|
| ENSG00000280077 | 8.680717116 | 0.077327072  | 0.600988496 | 0.128666476  | 0.897621563 | 0.944486149 |
| ENSG00000280088 | 40.51411172 | -0.467287673 | 0.293521366 | -1.592005646 | 0.111383436 | 0.228188751 |
| ENSG00000280099 | 59.69620329 | -0.939592653 | 0.249647219 | -3.763681639 | 0.00016743  | 0.000911938 |
| ENSG00000280120 | 12.08957858 | -0.290809885 | 0.497226504 | -0.584864007 | 0.558639162 | 0.705620385 |
| ENSG00000280128 | 101.2332202 | -0.562890944 | 0.186215486 | -3.022793412 | 0.002504532 | 0.009907394 |
| ENSG00000280138 | 91.25819754 | 0.025735201  | 0.187652287 | 0.13714302   | 0.890917749 | 0.94027635  |
| ENSG00000280152 | 10.8834848  | -0.455109091 | 0.541056497 | -0.841148925 | 0.40026451  | 0.568390171 |
| ENSG00000280173 | 59.86388999 | -0.180868184 | 0.236295982 | -0.765430636 | 0.444015156 | 0.608911539 |
| ENSG00000280176 | 10.88201165 | 1.063073546  | 0.577616009 | 1.840450283  | 0.065702157 | 0.151397343 |
| ENSG00000280184 | 13.11542491 | -0.335324402 | 0.474900851 | -0.706093497 | 0.480129996 | 0.640796774 |
| ENSG00000280195 | 10.35751631 | -0.06243369  | 0.551409762 | -0.113225579 | 0.909851717 | 0.951381168 |
| ENSG00000280205 | 20.96307422 | 0.032022743  | 0.392614295 | 0.081562856  | 0.93499434  | 0.964624614 |
| ENSG00000280206 | 53.57913092 | 0.188378513  | 0.243008722 | 0.775192394  | 0.438225982 | 0.603683473 |
| ENSG00000280211 | 15.30583916 | 0.236932949  | 0.467295669 | 0.507030055  | 0.612133731 | 0.747774297 |
| ENSG00000280219 | 9.446222814 | -0.707942804 | 0.585060728 | -1.210033028 | 0.22626622  | 0.38460329  |
| ENSG00000280239 | 30.57893213 | -0.813535938 | 0.319482821 | -2.54641528  | 0.010883563 | 0.034659126 |
| ENSG00000280287 | 11.06232187 | -0.893909852 | 0.526905294 | -1.696528508 | 0.089785836 | 0.192965367 |
| ENSG00000280303 | 15.61818469 | -0.444973463 | 0.440828714 | -1.009402176 | 0.312781795 | 0.484076461 |
| ENSG00000280332 | 9.911427854 | -0.781895546 | 0.555525818 | -1.407487321 | 0.159282934 | 0.297929078 |
| ENSG00000280347 | 76.71003117 | 0.895176081  | 0.207216368 | 4.320006621  | 1.56E-05    | 0.00010712  |
| ENSG00000280351 | 14.42877814 | 0.010906519  | 0.470146655 | 0.023198121  | 0.981492237 | 0.990660448 |
| ENSG00000280355 | 21.98248599 | -0.185356164 | 0.36733465  | -0.504597549 | 0.613841532 | 0.748716754 |
| ENSG00000280383 | 99.86728918 | -0.019749026 | 0.17993926  | -0.109753844 | 0.912604597 | 0.953041169 |
| ENSG00000280388 | 18.2813239  | 0.07632084   | 0.402182801 | 0.189766543  | 0.849492074 | 0.913831764 |
| ENSG00000280392 | 18.06254367 | -0.53521486  | 0.437463683 | -1.22344981  | 0.22115985  | 0.378906994 |
| ENSG00000280434 | 62.19686155 | -0.168297135 | 0.229968041 | -0.73182836  | 0.464273337 | 0.627141798 |
| ENSG00000280543 | 18.64900143 | 0.028903085  | 0.40858985  | 0.070738627  | 0.943605778 | 0.968637121 |
| ENSG00000280734 | 54.67995103 | 0.553407249  | 0.236372005 | 2.341255469  | 0.019219011 | 0.055894296 |
| ENSG00000280739 | 35.52373934 | -0.787974232 | 0.301123702 | -2.616779173 | 0.008876375 | 0.02920057  |
| ENSG00000280789 | 68.58562838 | -0.305693728 | 0.216243977 | -1.413651987 | 0.157464109 | 0.295550286 |
| ENSG00000280798 | 80.39799667 | -0.007472451 | 0.196918416 | -0.037946937 | 0.96972999  | 0.984233899 |
| ENSG00000280997 | 15.67150479 | 7.589510462  | 1.232087296 | 6.159880463  | 7.28E-10    | 1.04E-08    |
| ENSG00000281005 | 8.951121353 | -0.835300756 | 0.60196944  | -1.387613225 | 0.165254852 | 0.306568266 |
| ENSG00000281026 | 69.86696123 | -0.459132493 | 0.231146814 | -1.986324124 | 0.046997346 | 0.116186504 |
| ENSG00000281128 | 28.70648265 | 0.363146515  | 0.325828279 | 1.114533448  | 0.265050403 | 0.431693045 |
| ENSG00000281183 | 37.63279988 | -0.158167799 | 0.296305407 | -0.533799907 | 0.593479978 | 0.733598491 |
| ENSG00000281195 | 62.87649335 | -0.025218014 | 0.221658565 | -0.113769636 | 0.909420409 | 0.951381168 |
| ENSG00000281202 | 31.81093476 | 4.38647987   | 0.532560605 | 8.236583455  | 1.77E-16    | 4.73E-15    |
| ENSG00000281207 | 75.83458837 | -0.267616266 | 0.213513238 | -1.253394256 | 0.210062261 | 0.365145969 |
| ENSG00000281332 | 53.67103535 | -0.139680321 | 0.237570501 | -0.587953138 | 0.556563748 | 0.703568301 |
| ENSG00000281344 | 420.2376374 | -0.826804092 | 0.109603524 | -7.54359043  | 4.57E-14    | 1.04E-12    |
| ENSG00000281398 | 134.0332855 | 0.364248185  | 0.153334932 | 2.375506876  | 0.017524866 | 0.051902128 |
| ENSG00000281501 | 51.64074088 | -1.600660203 | 0.268016894 | -5.972236234 | 2.34E-09    | 3.12E-08    |
| ENSG00000281649 | 251.3701554 | -0.034971968 | 0.124242204 | -0.281482193 | 0.778340584 | 0.867349986 |
| ENSG00000281706 | 11.08650375 | -1.04232178  | 0.548624921 | -1.899880482 | 0.057448806 | 0.135878663 |
| ENSG00000281880 | 9.244686462 | -5.482461726 | 1.268835711 | -4.320860201 | 1.55E-05    | 0.000106759 |
| ENSG00000282057 | 10.0055817  | -0.331889949 | 0.54646842  | -0.607336009 | 0.543627946 | 0.69257589  |
| ENSG00000282164 | 28.82691287 | -0.488330072 | 0.331534685 | -1.472938108 | 0.140767725 | 0.271914774 |
| ENSG00000282381 | 16.21950415 | -0.845075985 | 0.441738772 | -1.913067264 | 0.055739442 | 0.132856354 |
| ENSG00000282508 | 11.03258868 | 0.26872017   | 0.525200644 | 0.5116524    | 0.608894305 | 0.745198811 |

|                 |             |              |             |              |             |             |
|-----------------|-------------|--------------|-------------|--------------|-------------|-------------|
| ENSG00000282851 | 28.51786524 | 1.254283747  | 0.345581582 | 3.629486677  | 0.000283985 | 0.001464981 |
| ENSG00000282936 | 121.0977372 | 0.285981653  | 0.179147141 | 1.596350637  | 0.11041053  | 0.226645729 |
| ENSG00000282977 | 16.6689805  | 0.565275197  | 0.431563491 | 1.309830902  | 0.190253047 | 0.339881031 |
| ENSG00000282988 | 9.571001617 | 1.716317447  | 0.600020849 | 2.860429685  | 0.004230674 | 0.015525908 |
| ENSG00000283041 | 40.85007891 | 0.382480451  | 0.275049853 | 1.390585914  | 0.16435103  | 0.30533513  |
| ENSG00000283103 | 18.60244709 | 0.109783145  | 0.396000508 | 0.277229808  | 0.781603653 | 0.869156627 |
| ENSG00000283122 | 18.72749467 | 0.046888155  | 0.411623488 | 0.1139103    | 0.9093089   | 0.951381168 |
| ENSG00000283154 | 5.46000313  | -5.728711165 | 1.319638334 | -4.341122122 | 1.42E-05    | 9.84E-05    |
| ENSG00000283172 | 14.00406258 | -0.198625492 | 0.456976139 | -0.43465178  | 0.663815204 | 0.785032175 |
| ENSG00000283199 | 16.48680666 | 0.692349167  | 0.444670787 | 1.556992693  | 0.11947222  | 0.241124465 |
| ENSG00000283355 | 10.81796865 | 0.618110498  | 0.520957739 | 1.186488753  | 0.23542934  | 0.396484348 |
| ENSG00000283415 | 43.73700691 | -0.721362237 | 0.279007885 | -2.58545466  | 0.009725066 | 0.031532501 |
| ENSG00000283563 | 10.76005551 | -1.729361028 | 0.58724038  | -2.944894605 | 0.003230647 | 0.012291684 |
| ENSG00000283674 | 24.5856158  | -0.384110263 | 0.359387313 | -1.068791938 | 0.285163433 | 0.454727068 |
| ENSG00000283761 | 14.89206691 | 0.134991696  | 0.459637963 | 0.293691356  | 0.76899376  | 0.861270559 |
| ENSG00000284024 | 232.9523248 | 0.156718196  | 0.126621435 | 1.237690886  | 0.2158307   | 0.372146477 |
| ENSG00000284052 | 13.98629149 | -0.399206691 | 0.472728634 | -0.84447326  | 0.398404999 | 0.56655143  |
| ENSG00000284194 | 49.14364551 | -0.074551929 | 0.266420397 | -0.279828159 | 0.779609347 | 0.868244866 |
| ENSG00000284428 | 22.95513262 | -0.492627146 | 0.378757559 | -1.300639773 | 0.193381786 | 0.344113751 |
| ENSG00000284591 | 11.04135632 | 0.331492708  | 0.516563385 | 0.64172707   | 0.52105041  | 0.675369842 |
| ENSG00000284602 | 9.492602122 | -0.484125582 | 0.566784476 | -0.854161682 | 0.393015411 | 0.561159532 |
| ENSG00000284624 | 20.43432229 | 0.168914123  | 0.389527746 | 0.433638231  | 0.664551168 | 0.785491334 |
| ENSG00000284634 | 14.16764863 | -0.447946814 | 0.493346055 | -0.907976884 | 0.363890435 | 0.534850783 |
| ENSG00000284691 | 18.3140985  | 0.208618482  | 0.396608403 | 0.526006206  | 0.598883895 | 0.737617016 |
| ENSG00000284753 | 27.4652355  | -0.199805071 | 0.334481437 | -0.597357728 | 0.55026857  | 0.698254257 |
| ENSG00000284770 | 77.30602925 | -0.170271565 | 0.209876902 | -0.811292539 | 0.417197693 | 0.58515986  |
| ENSG00000284946 | 41.75557128 | -0.271772615 | 0.268337682 | -1.012800783 | 0.311155327 | 0.482641219 |
| ENSG00000284948 | 14.788052   | 0.538851674  | 0.459671692 | 1.172253335  | 0.241095361 | 0.403558929 |
| ENSG00000285043 | 8.555816926 | -0.42937394  | 0.585319069 | -0.733572444 | 0.46320936  | 0.626367143 |
| ENSG00000285053 | 44.35506558 | 0.080282946  | 0.265124371 | 0.302812395  | 0.762032837 | 0.856479057 |
| ENSG00000285077 | 19.98179357 | -0.595193371 | 0.419170752 | -1.419930583 | 0.155627891 | 0.293122149 |
| ENSG00000285184 | 21.84021963 | -0.883637304 | 0.375075191 | -2.355893764 | 0.018478201 | 0.054132074 |
| ENSG00000285210 | 10.7226564  | -1.218291608 | 0.563334343 | -2.162643946 | 0.030568575 | 0.081794572 |
| ENSG00000285219 | 12.52592743 | -0.899250885 | 0.508980446 | -1.766769024 | 0.077266918 | 0.171681177 |
| ENSG00000285230 | 13.69369598 | 0.474765419  | 0.467449758 | 1.015650155  | 0.309796012 | 0.481094524 |
| ENSG00000285280 | 17.3506561  | -1.239794186 | 0.444185219 | -2.791164888 | 0.005251871 | 0.018667265 |
| ENSG00000285410 | 82.09210416 | -0.166006959 | 0.203402531 | -0.816149919 | 0.414414396 | 0.582535677 |
| ENSG00000285437 | 7.414998605 | 0.097563242  | 0.649873286 | 0.150126562  | 0.880664764 | 0.934201626 |
| ENSG00000285533 | 17.72200274 | 0.418951129  | 0.412786889 | 1.014933225  | 0.310137659 | 0.48148803  |
| ENSG00000285589 | 51.90169289 | 0.275181729  | 0.252576927 | 1.089496704  | 0.275934908 | 0.444400097 |
| ENSG00000285646 | 18.87913295 | 1.149032243  | 0.414768691 | 2.770296474  | 0.005600529 | 0.019681009 |
| ENSG00000285650 | 8.465674001 | -0.973212356 | 0.638020547 | -1.525362092 | 0.127168809 | 0.252343587 |
| ENSG00000285667 | 9.259993097 | -0.66084212  | 0.602677363 | -1.096510604 | 0.272855385 | 0.44090643  |
| ENSG00000285669 | 16.98833857 | -0.908485588 | 0.425700737 | -2.134094468 | 0.032835049 | 0.086666839 |
| ENSG00000285679 | 11.33164636 | 0.515029137  | 0.5381944   | 0.956957445  | 0.338588735 | 0.510520298 |
| ENSG00000285693 | 16.94985355 | 0.061791162  | 0.421299435 | 0.146668039  | 0.883394047 | 0.935631994 |
| ENSG00000285730 | 11.2043659  | 0.290970746  | 0.514340977 | 0.56571566   | 0.571587088 | 0.716690513 |
| ENSG00000285756 | 82.07973725 | -0.044600102 | 0.193198747 | -0.230850886 | 0.817430647 | 0.892507031 |
| ENSG00000285793 | 31.4295296  | 0.065974474  | 0.30970095  | 0.213026385  | 0.831306383 | 0.901477895 |
| ENSG00000285796 | 30.35278461 | -0.261525919 | 0.323255739 | -0.809037203 | 0.418493748 | 0.586450686 |

|                 |             |              |             |              |             |             |
|-----------------|-------------|--------------|-------------|--------------|-------------|-------------|
| ENSG00000285816 | 10.49403049 | -0.238644165 | 0.534952655 | -0.446103338 | 0.655522602 | 0.779161109 |
| ENSG00000285922 | 15.27869227 | 1.8839128    | 0.483770214 | 3.894230656  | 9.85E-05    | 0.000566892 |
| ENSG00000285967 | 86.3818654  | -0.823209698 | 0.198513135 | -4.146877724 | 3.37E-05    | 0.000215789 |
| ENSG00000285999 | 9.443803387 | -0.487621345 | 0.562055589 | -0.867567825 | 0.385630967 | 0.554504882 |
| ENSG00000286019 | 7.078405669 | -0.677615322 | 0.662682352 | -1.022534129 | 0.306528168 | 0.47752037  |
| ENSG00000286058 | 21.98573192 | -0.033866547 | 0.364263955 | -0.092972546 | 0.925925372 | 0.959462504 |
| ENSG00000286121 | 8.715887441 | -1.789342129 | 0.654593793 | -2.73351527  | 0.006266222 | 0.021632248 |
| ENSG00000286129 | 16.05639436 | -0.36736302  | 0.446539992 | -0.822687836 | 0.410685534 | 0.579077887 |
| ENSG00000286162 | 8.579306476 | -0.204026202 | 0.594661129 | -0.343096584 | 0.731525801 | 0.834408683 |
| ENSG00000286172 | 63.42404008 | 0.426914577  | 0.229280732 | 1.861973199  | 0.062606868 | 0.14577137  |
| ENSG00000286177 | 26.79799235 | 0.259730759  | 0.333794769 | 0.778115126  | 0.436501146 | 0.602607528 |
| ENSG00000286207 | 45.11941823 | -0.732547426 | 0.26554682  | -2.75863754  | 0.005804287 | 0.020276753 |
| ENSG00000286214 | 33.38903131 | -1.471143928 | 0.33094649  | -4.445262216 | 8.78E-06    | 6.38E-05    |
| ENSG00000286219 | 18.59099246 | 0.179521154  | 0.394577306 | 0.454970804  | 0.649130243 | 0.774121217 |
| ENSG00000286264 | 31.26043719 | 0.146877641  | 0.338757115 | 0.433578024  | 0.664594896 | 0.785491334 |
| ENSG00000286314 | 20.77186547 | -0.489010121 | 0.383028386 | -1.276694206 | 0.201710228 | 0.354212163 |
| ENSG00000286340 | 20.26561358 | -1.011386787 | 0.399721353 | -2.530229569 | 0.011398792 | 0.036054679 |
| ENSG00000286379 | 79.98034013 | -1.232397714 | 0.217051241 | -5.677911395 | 1.36E-08    | 1.65E-07    |
| ENSG00000286385 | 25.96988624 | 0.819831457  | 0.344388537 | 2.380542238  | 0.017287179 | 0.051295523 |
| ENSG00000286388 | 36.7199778  | -0.512621435 | 0.300807056 | -1.704153623 | 0.088352391 | 0.19046747  |
| ENSG00000286389 | 19.16608615 | -0.554698979 | 0.3956412   | -1.402025317 | 0.160907687 | 0.300168695 |
| ENSG00000286402 | 11.24710812 | 0.954094755  | 0.519343846 | 1.837115741  | 0.066192811 | 0.152278155 |
| ENSG00000286432 | 17.42449318 | 1.391904727  | 0.436125171 | 3.191525779  | 0.001415235 | 0.006075735 |
| ENSG00000286452 | 20.19117041 | -5.77795274  | 1.041231642 | -5.549152086 | 2.87E-08    | 3.30E-07    |
| ENSG00000286522 | 1091.553119 | -0.169761253 | 0.080940568 | -2.097356818 | 0.035962001 | 0.093530499 |
| ENSG00000286634 | 24.53260048 | -0.200139665 | 0.347672854 | -0.57565514  | 0.564848303 | 0.710778833 |
| ENSG00000286676 | 15.03889082 | -0.637942799 | 0.45682956  | -1.396456917 | 0.162576946 | 0.302719825 |
| ENSG00000286681 | 15.36911184 | -0.673982085 | 0.449433676 | -1.499625242 | 0.133711505 | 0.262141733 |
| ENSG00000286707 | 7.847143627 | 0.36409941   | 0.621265392 | 0.586060989  | 0.557834531 | 0.704984405 |
| ENSG00000286721 | 10.36842403 | 0.232326345  | 0.547260473 | 0.424526084  | 0.671182187 | 0.790284676 |
| ENSG00000286775 | 11.79418562 | -2.15039507  | 0.58309785  | -3.687880293 | 0.00022613  | 0.001193705 |
| ENSG00000286786 | 65.74166001 | -0.935762325 | 0.228148528 | -4.101548812 | 4.10E-05    | 0.000257357 |
| ENSG00000286787 | 11.95022769 | -0.880514289 | 0.509674169 | -1.727602343 | 0.084059542 | 0.183551126 |
| ENSG00000286813 | 35.36984364 | -0.527868297 | 0.311067608 | -1.696956814 | 0.089704826 | 0.192820763 |
| ENSG00000286825 | 13.4034095  | -0.470686391 | 0.485994796 | -0.968500888 | 0.332794276 | 0.505081442 |
| ENSG00000286835 | 12.08009511 | -0.224392374 | 0.493620042 | -0.454585218 | 0.649407671 | 0.774190724 |
| ENSG00000286860 | 6.182422547 | -5.908940585 | 1.305667237 | -4.525609909 | 6.02E-06    | 4.54E-05    |
| ENSG00000286872 | 10.78334437 | -1.650729256 | 0.591158501 | -2.792363221 | 0.005232458 | 0.018604436 |
| ENSG00000286881 | 10.44239495 | 0.425944225  | 0.554665149 | 0.767930391  | 0.442528541 | 0.607577494 |
| ENSG00000286952 | 9.60972036  | -0.57194286  | 0.603339551 | -0.947961821 | 0.343148891 | 0.51503499  |
| ENSG00000286977 | 34.18796112 | -0.532307162 | 0.30809735  | -1.72772392  | 0.084037733 | 0.183533579 |
| ENSG00000286980 | 26.02909833 | 5.076603384  | 0.706888104 | 7.181622316  | 6.89E-13    | 1.39E-11    |
| ENSG00000286997 | 53.96828358 | -1.9616635   | 0.274086581 | -7.157094286 | 8.24E-13    | 1.65E-11    |
| ENSG00000287001 | 18.53617017 | 0.192308404  | 0.409107401 | 0.47006826   | 0.63830625  | 0.766295498 |
| ENSG00000287014 | 27.36052665 | 1.13662611   | 0.342718088 | 3.316504584  | 0.000911511 | 0.004139668 |
| ENSG00000287022 | 9.626903377 | -0.710231449 | 0.570248237 | -1.245477677 | 0.212956216 | 0.36831023  |
| ENSG00000287038 | 12.11546997 | -2.572191133 | 0.621704614 | -4.137320322 | 3.51E-05    | 0.000223749 |
| ENSG00000287064 | 338.2254964 | 0.510187253  | 0.108541267 | 4.700398919  | 2.60E-06    | 2.12E-05    |
| ENSG00000287110 | 12.79659576 | 0.374991167  | 0.49403794  | 0.759033137  | 0.447832735 | 0.612950056 |
| ENSG00000287126 | 12.41382372 | -0.094205957 | 0.489264878 | -0.192545922 | 0.8473146   | 0.912187936 |

|                 |             |              |             |              |             |             |
|-----------------|-------------|--------------|-------------|--------------|-------------|-------------|
| ENSG00000287151 | 18.33220428 | -0.042070124 | 0.423615902 | -0.099311956 | 0.920890585 | 0.956715484 |
| ENSG00000287168 | 29.57397659 | -0.740884281 | 0.327752255 | -2.26050094  | 0.023790178 | 0.066503608 |
| ENSG00000287176 | 9.124765862 | 5.828519766  | 1.276432213 | 4.566258753  | 4.97E-06    | 3.80E-05    |
| ENSG00000287200 | 17.62237212 | 0.395686048  | 0.44206388  | 0.89508794   | 0.37074008  | 0.541800448 |
| ENSG00000287222 | 20.77994838 | -0.175685605 | 0.388789452 | -0.451878527 | 0.651356494 | 0.775982078 |
| ENSG00000287260 | 8.729842497 | -1.369855475 | 0.623626709 | -2.196595262 | 0.028049365 | 0.076284497 |
| ENSG00000287263 | 9.591612813 | -0.686465368 | 0.576273656 | -1.191214211 | 0.233569502 | 0.393918933 |
| ENSG00000287264 | 12.24123196 | -0.550339706 | 0.514335773 | -1.070000834 | 0.284618933 | 0.454184517 |
| ENSG00000287356 | 20.89873126 | 0.383765915  | 0.399376296 | 0.960913101  | 0.336595863 | 0.508459199 |
| ENSG00000287364 | 10.03168941 | -1.906225369 | 0.605703702 | -3.147125176 | 0.001648844 | 0.006934523 |
| ENSG00000287376 | 17.46634437 | 0.799279463  | 0.428484807 | 1.865362436  | 0.062130619 | 0.144806505 |
| ENSG00000287431 | 40.82103639 | -0.084010781 | 0.27535778  | -0.305096814 | 0.760292418 | 0.855275694 |
| ENSG00000287553 | 33.48260633 | 0.149196311  | 0.314147961 | 0.474923697  | 0.63484136  | 0.764083333 |
| ENSG00000287562 | 18.28870644 | -0.327052407 | 0.404400559 | -0.808733816 | 0.418668273 | 0.586578219 |
| ENSG00000287665 | 11.059281   | 0.336341772  | 0.518197183 | 0.649061366  | 0.516298712 | 0.671307749 |
| ENSG00000287697 | 22.28869425 | 0.049566047  | 0.362460497 | 0.136748825  | 0.891229336 | 0.94027635  |
| ENSG00000287707 | 10.31084781 | -0.328356656 | 0.544195089 | -0.603380409 | 0.546255652 | 0.694729455 |
| ENSG00000287730 | 36.79695587 | -2.960755722 | 0.387240008 | -7.645789839 | 2.08E-14    | 4.81E-13    |
| ENSG00000287763 | 11.24288462 | 0.075159756  | 0.53083218  | 0.141588546  | 0.887405015 | 0.93824263  |
| ENSG00000287787 | 11.06277444 | -0.482116609 | 0.533666822 | -0.903403752 | 0.36631165  | 0.537621956 |
| ENSG00000287804 | 93.73761159 | -0.017590683 | 0.185811186 | -0.094669667 | 0.924577212 | 0.958810774 |
| ENSG00000287811 | 144.9896593 | -1.983699509 | 0.175163374 | -11.32485328 | 9.88E-30    | 5.34E-28    |
| ENSG00000287837 | 40.5333494  | 0.249934642  | 0.287396304 | 0.869651554  | 0.384490855 | 0.553658948 |
| ENSG00000287853 | 16.40428497 | 1.599019527  | 0.460991114 | 3.468655855  | 0.000523069 | 0.002521466 |
| ENSG00000287859 | 10.8705606  | -0.712431408 | 0.547715437 | -1.300732754 | 0.193349947 | 0.344100684 |
| ENSG00000287925 | 23.38527833 | -1.76318387  | 0.401667773 | -4.389657292 | 1.14E-05    | 8.05E-05    |
| ENSG00000287978 | 38.49587455 | 0.458416009  | 0.284445558 | 1.611612472  | 0.107046295 | 0.221259462 |
| ENSG00000288009 | 11.28597633 | -0.841955131 | 0.542935313 | -1.550746673 | 0.120962405 | 0.243397636 |
| ENSG00000288032 | 18.95660473 | -0.367299216 | 0.416635814 | -0.881583396 | 0.378002138 | 0.547401652 |
| ENSG00000288035 | 71.02998264 | -1.352261433 | 0.238838496 | -5.661823595 | 1.50E-08    | 1.79E-07    |
| ENSG00000288044 | 20.04503797 | -0.234595027 | 0.418926041 | -0.559991512 | 0.575485227 | 0.719715188 |
| ENSG00000288061 | 18.76843318 | 0.154148642  | 0.39590375  | 0.389358883  | 0.697010684 | 0.809969314 |
| ENSG00000288398 | 24.82296018 | 0.611878645  | 0.361184099 | 1.694090764  | 0.090248037 | 0.193709482 |
| ENSG00000288558 | 27.33323378 | 0.675814925  | 0.391633945 | 1.725629083  | 0.084414164 | 0.184153713 |
| ENSG00000288559 | 25.8451845  | 0.228534091  | 0.335773598 | 0.680619597  | 0.496112223 | 0.654786094 |
| ENSG00000288596 | 13.27712467 | 0.042402903  | 0.467379212 | 0.090724837  | 0.927711235 | 0.960604431 |
| ENSG00000288612 | 19.37714716 | 0.301261242  | 0.401443225 | 0.750445451  | 0.452986465 | 0.617396281 |
| ENSG00000288670 | 25.61083245 | -0.18788494  | 0.348817919 | -0.53863328  | 0.59013992  | 0.731400693 |
| ENSG00000288701 | 3397.938826 | -0.022644088 | 0.057795992 | -0.391793391 | 0.695210879 | 0.808564553 |
| ENSG00000288714 | 6.31311414  | -4.910015678 | 1.304383666 | -3.764241921 | 0.000167055 | 0.000910249 |
| ENSG00000288719 | 11.3056799  | -0.614879789 | 0.550686951 | -1.116568656 | 0.2641788   | 0.430800975 |
| ENSG00000288741 | 7.701972296 | 0.280469542  | 0.653874785 | 0.428934634  | 0.667970795 | 0.787758018 |
| ENSG00000288744 | 16.24501222 | 0.152351419  | 0.437820473 | 0.347976919  | 0.727857518 | 0.83181315  |
| ENSG00000288776 | 17.25339507 | 4.505429475  | 0.738674347 | 6.099344714  | 1.07E-09    | 1.48E-08    |
| ENSG00000288793 | 28.95101927 | 6.626814932  | 1.058023404 | 6.26339163   | 3.77E-10    | 5.55E-09    |
| ENSG00000288808 | 11.20862828 | -2.526173297 | 0.637797636 | -3.960775572 | 7.47E-05    | 0.0004426   |
| ENSG00000288810 | 9.54074299  | 1.112316977  | 0.596135621 | 1.865879069  | 0.062058287 | 0.144685934 |
| ENSG00000288826 | 22.74152835 | 0.653966214  | 0.366598877 | 1.783874025  | 0.074444138 | 0.166441629 |
| ENSG00000288827 | 59.81624082 | 0.637245109  | 0.226823879 | 2.809426905  | 0.004962979 | 0.017799521 |
| ENSG00000288838 | 16.39095886 | -0.828699616 | 0.431955194 | -1.918485128 | 0.055049526 | 0.131610635 |

|                 |             |              |             |              |             |             |
|-----------------|-------------|--------------|-------------|--------------|-------------|-------------|
| ENSG00000288839 | 75.7657109  | 0.117034422  | 0.210627799 | 0.555645659  | 0.578453112 | 0.721948544 |
| ENSG00000288863 | 9.804338289 | 0.047373981  | 0.570084337 | 0.083099951  | 0.933772065 | 0.963895958 |
| ENSG00000288876 | 29.04686151 | -1.330035055 | 0.344815734 | -3.857234238 | 0.000114677 | 0.000652439 |
| ENSG00000288879 | 10.41756972 | -0.081839792 | 0.574395352 | -0.142479899 | 0.886700955 | 0.938065731 |
| ENSG00000288881 | 9.747977584 | -0.751298114 | 0.55597469  | -1.351317114 | 0.176593872 | 0.321656396 |
| ENSG00000288899 | 20.61965574 | -0.33714342  | 0.389971318 | -0.864533887 | 0.387294673 | 0.555986538 |
| ENSG00000288910 | 10.50040952 | -0.552234699 | 0.566476682 | -0.974858658 | 0.329630376 | 0.502149212 |
| ENSG00000288913 | 11.95086737 | 0.626680445  | 0.495557642 | 1.264596471  | 0.206016019 | 0.359535554 |
| ENSG00000288920 | 27.94313634 | -0.163054291 | 0.325693176 | -0.500637726 | 0.616626106 | 0.750779831 |
| ENSG00000288924 | 58.67402149 | -0.246399729 | 0.233496449 | -1.055261139 | 0.291305909 | 0.461787846 |
| ENSG00000288928 | 64.57745306 | -0.082075211 | 0.232906971 | -0.352394825 | 0.724542183 | 0.829473842 |
| ENSG00000288934 | 8.384509794 | -0.019143068 | 0.616191634 | -0.031066745 | 0.97521631  | 0.987447813 |
| ENSG00000288940 | 6.191731091 | -3.451156855 | 1.013108864 | -3.406501491 | 0.000658012 | 0.003093405 |
| ENSG00000288947 | 17.62663703 | 0.409705053  | 0.423622921 | 0.967145622  | 0.333471242 | 0.505751515 |
| ENSG00000288953 | 10.93036567 | 0.215047647  | 0.52510601  | 0.409531872  | 0.682149382 | 0.798912154 |
| ENSG00000288958 | 30.29643017 | 0.293384605  | 0.314241693 | 0.93362724   | 0.350496209 | 0.522448749 |
| ENSG00000288961 | 17.32002954 | -0.088565827 | 0.420941457 | -0.210399394 | 0.833355966 | 0.902386945 |
| ENSG00000288973 | 65.4893074  | 0.044226681  | 0.217619873 | 0.203229054  | 0.838956005 | 0.906175702 |
| ENSG00000288983 | 16.81961277 | -0.089159536 | 0.422103182 | -0.211226874 | 0.832710241 | 0.902134873 |
| ENSG00000288993 | 31.01566483 | -1.934541414 | 0.373751291 | -5.176012654 | 2.27E-07    | 2.26E-06    |
| ENSG00000288999 | 11.65968827 | 0.620237124  | 0.524044932 | 1.183557146  | 0.236588413 | 0.39772109  |
| ENSG00000289004 | 13.15737816 | -0.468827043 | 0.490503983 | -0.955806801 | 0.339169852 | 0.511070291 |
| ENSG00000289007 | 8.408815574 | -1.171686213 | 0.620533069 | -1.888193024 | 0.059000042 | 0.138846304 |
| ENSG00000289017 | 15.46924617 | -0.098341756 | 0.451440356 | -0.217839976 | 0.827553796 | 0.898836169 |
| ENSG00000289019 | 13.39861168 | -1.823072876 | 0.531152239 | -3.432298203 | 0.000598489 | 0.002845    |
| ENSG00000289041 | 8.982619382 | -0.604909456 | 0.593855346 | -1.018614146 | 0.308386186 | 0.479662954 |
| ENSG00000289044 | 11.6827743  | 0.238029219  | 0.497525656 | 0.478426019  | 0.632347018 | 0.761995244 |
| ENSG00000289047 | 63.91691971 | -0.397976657 | 0.22056755  | -1.804330044 | 0.071179583 | 0.161111762 |
| ENSG00000289049 | 13.03986706 | 2.825697448  | 0.58584087  | 4.823319083  | 1.41E-06    | 1.21E-05    |
| ENSG00000289056 | 8.439326197 | -0.231209043 | 0.585498898 | -0.394892363 | 0.692922326 | 0.806697999 |
| ENSG00000289065 | 8.739146823 | -0.631320363 | 0.617792635 | -1.021896876 | 0.306829711 | 0.477778179 |
| ENSG00000289089 | 13.98266394 | -0.034539141 | 0.482980047 | -0.071512564 | 0.942989826 | 0.968571079 |
| ENSG00000289092 | 9.87593679  | -0.024510487 | 0.544517484 | -0.045013223 | 0.964096769 | 0.981139413 |
| ENSG00000289100 | 10.39421315 | -0.223294972 | 0.546746273 | -0.408406939 | 0.68297494  | 0.799479082 |
| ENSG00000289106 | 23.81717797 | -0.452289124 | 0.36099712  | -1.252888454 | 0.210246305 | 0.365330262 |
| ENSG00000289115 | 12.0700845  | 0.825730243  | 0.510140903 | 1.618631711  | 0.105526528 | 0.218600669 |
| ENSG00000289121 | 12.11279095 | -0.282973858 | 0.512930413 | -0.551680795 | 0.58116707  | 0.723664022 |
| ENSG00000289138 | 94.64189694 | -0.165674172 | 0.191006991 | -0.867372292 | 0.385738059 | 0.554545339 |
| ENSG00000289154 | 7.964352238 | -1.319096679 | 0.66310515  | -1.98927226  | 0.04667116  | 0.115563156 |
| ENSG00000289155 | 28.29865762 | 1.537553118  | 0.344854208 | 4.458559828  | 8.25E-06    | 6.03E-05    |
| ENSG00000289159 | 14.91723684 | 0.806007556  | 0.460497502 | 1.750297346  | 0.080067019 | 0.176597298 |
| ENSG00000289164 | 7.340750592 | -0.565756556 | 0.667419099 | -0.847678104 | 0.396617264 | 0.564466333 |
| ENSG00000289179 | 16.28852992 | 0.729516344  | 0.438125179 | 1.665086554  | 0.095895489 | 0.203097048 |
| ENSG00000289182 | 18.07199344 | -1.417124665 | 0.454217425 | -3.119925806 | 0.001808966 | 0.007500161 |
| ENSG00000289189 | 6.203671642 | -5.912550956 | 1.303746693 | -4.535045794 | 5.76E-06    | 4.36E-05    |
| ENSG00000289194 | 28.33118971 | -0.35011659  | 0.326808394 | -1.071320675 | 0.284025266 | 0.453633078 |
| ENSG00000289210 | 18.94395781 | 0.821896182  | 0.397147528 | 2.069498422  | 0.038499339 | 0.09878655  |
| ENSG00000289222 | 13.9329089  | 0.484112099  | 0.501053853 | 0.966187757  | 0.333950238 | 0.505990311 |
| ENSG00000289227 | 13.70124955 | -3.622622486 | 0.735334684 | -4.926494785 | 8.37E-07    | 7.54E-06    |
| ENSG00000289234 | 158.4216552 | -1.111903679 | 0.152715999 | -7.280859164 | 3.32E-13    | 6.91E-12    |

|                 |             |              |             |              |             |             |
|-----------------|-------------|--------------|-------------|--------------|-------------|-------------|
| ENSG00000289267 | 11.94391353 | 0.595441828  | 0.511332368 | 1.164490779  | 0.244225178 | 0.407389986 |
| ENSG00000289268 | 50.5959405  | -0.336093355 | 0.254205458 | -1.322132723 | 0.186123959 | 0.334204685 |
| ENSG00000289269 | 9.326472748 | -0.311472836 | 0.573157927 | -0.543432833 | 0.586831825 | 0.728779652 |
| ENSG00000289270 | 33.30773281 | -0.812316472 | 0.317205078 | -2.560855827 | 0.010441468 | 0.033462203 |
| ENSG00000289274 | 7.576530651 | -1.79232601  | 0.744475369 | -2.407502093 | 0.01606207  | 0.048272122 |
| ENSG00000289283 | 15.60286625 | -0.528570896 | 0.457083361 | -1.156399337 | 0.247517853 | 0.411757849 |
| ENSG00000289293 | 74.75927726 | 0.573809289  | 0.472968693 | 1.213207761  | 0.225050398 | 0.38318581  |
| ENSG00000289294 | 25.06173624 | -0.372345506 | 0.356893414 | -1.043296097 | 0.296811178 | 0.467306279 |
| ENSG00000289295 | 10.05389087 | -0.035069238 | 0.54206546  | -0.064695578 | 0.948416384 | 0.971358017 |
| ENSG00000289318 | 18.39253882 | 0.147095997  | 0.421126945 | 0.349291344  | 0.726870596 | 0.831258753 |
| ENSG00000289326 | 12.38189643 | -2.930365776 | 0.648835848 | -4.516343823 | 6.29E-06    | 4.72E-05    |
| ENSG00000289353 | 34.99892972 | -0.69311925  | 0.299280361 | -2.315953001 | 0.020560835 | 0.059126532 |
| ENSG00000289357 | 44.68707828 | -0.321371635 | 0.283033739 | -1.135453449 | 0.256185376 | 0.421781057 |
| ENSG00000289372 | 13.46004383 | 0.055257606  | 0.476616016 | 0.115937366  | 0.907702181 | 0.950649754 |
| ENSG00000289378 | 12.70805557 | -0.777411448 | 0.50961126  | -1.525498963 | 0.127134692 | 0.252311531 |
| ENSG00000289380 | 8.113468296 | 0.415745842  | 0.608158548 | 0.683614238  | 0.494218791 | 0.65345363  |
| ENSG00000289394 | 8.714602995 | -0.0774815   | 0.584614225 | -0.132534408 | 0.894561609 | 0.942843412 |
| ENSG00000289396 | 26.26104953 | 0.20910245   | 0.350057932 | 0.5973367    | 0.550282606 | 0.698254257 |
| ENSG00000289411 | 6.791135676 | 5.354618978  | 1.301384973 | 4.114554179  | 3.88E-05    | 0.00024472  |
| ENSG00000289413 | 204.5285948 | 0.924436759  | 0.143808512 | 6.428247858  | 1.29E-10    | 2.01E-09    |
| ENSG00000289417 | 35.34293378 | -3.07030418  | 0.399572275 | -7.683977017 | 1.54E-14    | 3.60E-13    |
| ENSG00000289419 | 31.35984154 | 0.161602197  | 0.318420855 | 0.507511348  | 0.611796076 | 0.74762066  |
| ENSG00000289433 | 16.8034388  | 0.348849623  | 0.443589143 | 0.78642507   | 0.431618501 | 0.597864617 |
| ENSG00000289436 | 61.83502434 | 4.180148555  | 0.360475996 | 11.59619117  | 4.31E-31    | 2.44E-29    |
| ENSG00000289463 | 18.71602441 | -0.22748088  | 0.402965031 | -0.564517669 | 0.572401879 | 0.717385398 |
| ENSG00000289468 | 11.80197756 | -0.719107871 | 0.522578585 | -1.376076042 | 0.168798092 | 0.3113323   |
| ENSG00000289472 | 38.39941963 | -0.340026982 | 0.303966089 | -1.118634593 | 0.263296059 | 0.429810546 |
| ENSG00000289483 | 18.66875555 | 0.398116264  | 0.408471651 | 0.974648458  | 0.329734668 | 0.502217902 |
| ENSG00000289486 | 12.408607   | 0.186963264  | 0.490511785 | 0.381159575  | 0.703084843 | 0.814114448 |
| ENSG00000289488 | 11.34452937 | -0.320935125 | 0.527819449 | -0.608039597 | 0.543161212 | 0.692169604 |
| ENSG00000289494 | 8.154764352 | -0.472670117 | 0.609100417 | -0.776013451 | 0.437741044 | 0.603314879 |
| ENSG00000289496 | 13.548487   | -0.575294506 | 0.485051535 | -1.186048212 | 0.23560326  | 0.396663823 |
| ENSG00000289499 | 9.006392485 | 1.203329973  | 0.595540085 | 2.020569235  | 0.043324376 | 0.10908362  |
| ENSG00000289504 | 44.90445105 | -0.519748679 | 0.284295452 | -1.828199062 | 0.067519682 | 0.154747751 |
| ENSG00000289507 | 10.77014532 | -0.67447134  | 0.53931377  | -1.25061027  | 0.211076702 | 0.366274791 |
| ENSG00000289511 | 14.21459647 | -0.032272614 | 0.46541399  | -0.069341737 | 0.944717605 | 0.969282608 |
| ENSG00000289558 | 43.5658864  | -0.276115617 | 0.276657572 | -0.998041061 | 0.318259448 | 0.48997802  |
| ENSG00000289562 | 8.126146406 | -0.555672717 | 0.629178166 | -0.883172283 | 0.377143195 | 0.546670343 |
| ENSG00000289579 | 14.15161261 | -0.590882026 | 0.468680478 | -1.260735306 | 0.207404229 | 0.361420072 |
| ENSG00000289586 | 31.94761931 | -0.555226841 | 0.321336714 | -1.727866182 | 0.084012219 | 0.183533579 |
| ENSG00000289605 | 34.62784849 | 4.806330295  | 0.56946539  | 8.440074468  | 3.17E-17    | 8.87E-16    |
| ENSG00000289606 | 19.34621401 | -0.317149885 | 0.42531219  | -0.745687268 | 0.455856352 | 0.61958531  |
| ENSG00000289609 | 94.50087962 | 2.258510438  | 0.212044567 | 10.65111205  | 1.72E-26    | 8.20E-25    |
| ENSG00000289727 | 39.66068558 | -0.484783038 | 0.296590359 | -1.634520554 | 0.102149594 | 0.213240503 |
| ENSG00000289740 | 366.8146384 | -0.561306213 | 0.211667871 | -2.651825287 | 0.008005796 | 0.026781951 |
| ENSG00000289858 | 14.84773367 | -0.615275161 | 0.493291506 | -1.247285133 | 0.212292967 | 0.367432147 |
| ENSG00000289871 | 14.26127079 | -6.138053921 | 1.2362969   | -4.964870431 | 6.87E-07    | 6.32E-06    |
| ENSG00000289872 | 9.4729803   | 0.548915532  | 0.575521716 | 0.953770321  | 0.340199916 | 0.511866775 |
| ENSG00000289883 | 13.74037215 | 0.256640252  | 0.473065326 | 0.542504887  | 0.587470741 | 0.729379663 |
| ENSG00000289915 | 25.69583078 | -0.064702463 | 0.342716097 | -0.188793185 | 0.850254914 | 0.914361666 |

|                 |             |              |             |              |             |             |
|-----------------|-------------|--------------|-------------|--------------|-------------|-------------|
| ENSG00000289926 | 239.353515  | -0.355196147 | 0.127668346 | -2.782178655 | 0.005399531 | 0.019081059 |
| ENSG00000289975 | 9.871465673 | 0.28891357   | 0.58201976  | 0.496398215  | 0.619613485 | 0.753046428 |
| ENSG00000289997 | 24.2588956  | 0.105788566  | 0.351660835 | 0.300825556  | 0.76354752  | 0.857289746 |
| ENSG00000290032 | 10.49621018 | 0.677548129  | 0.544625487 | 1.244062471  | 0.213476572 | 0.368935212 |
| ENSG00000290039 | 49.63728636 | 0.796241844  | 0.248927361 | 3.19869154   | 0.001380528 | 0.005955859 |
| ENSG00000290058 | 10.51771286 | 0.518777405  | 0.548712357 | 0.945445092  | 0.344431691 | 0.516231226 |
| ENSG00000290065 | 11.845371   | 0.132145681  | 0.501832941 | 0.263326039  | 0.792299292 | 0.876125966 |
| ENSG00000290082 | 14.77532661 | 0.09475516   | 0.477686611 | 0.198362603  | 0.842761374 | 0.908748678 |
| ENSG00000290085 | 15.58084778 | -0.636549391 | 0.463994548 | -1.371889806 | 0.170097744 | 0.313030658 |
| ENSG00000290121 | 89.27962832 | 0.337166713  | 0.188144119 | 1.792066181  | 0.073122365 | 0.164238866 |
| ENSG00000290292 | 189.4167702 | -0.541609985 | 0.14116554  | -3.836701122 | 0.000124698 | 0.000704122 |
| ENSG00000290374 | 13.29720712 | 0.264578058  | 0.468245491 | 0.565041336  | 0.572045649 | 0.717201466 |
| ENSG00000290376 | 204.7620319 | -0.563623567 | 0.141898177 | -3.972028241 | 7.13E-05    | 0.000423629 |
| ENSG00000290385 | 16.18959406 | -0.173194371 | 0.436674127 | -0.396621555 | 0.691646555 | 0.805869207 |
| ENSG00000290387 | 15.39490928 | 0.779545237  | 0.4537322   | 1.718073429  | 0.085783223 | 0.186330127 |
| ENSG00000290399 | 23.33386564 | -0.186790159 | 0.357231394 | -0.522882821 | 0.6010558   | 0.739384432 |
| ENSG00000290445 | 29.81604744 | 1.074281323  | 0.33366329  | 3.219656926  | 0.001283441 | 0.005574674 |
| ENSG00000290450 | 29.96714337 | -0.097187206 | 0.315342916 | -0.308195304 | 0.757933726 | 0.853990137 |
| ENSG00000290474 | 14.46236296 | -0.154792151 | 0.449000423 | -0.344748341 | 0.730283573 | 0.83331836  |
| ENSG00000290535 | 38.44345794 | -0.184551351 | 0.28747994  | -0.641962533 | 0.52089751  | 0.675253537 |
| ENSG00000290548 | 41.78871333 | -0.184571065 | 0.275391922 | -0.670212342 | 0.502722437 | 0.660716886 |
| ENSG00000290555 | 9.693497738 | 0.574227718  | 0.593524683 | 0.967487509  | 0.333300382 | 0.505601563 |
| ENSG00000290571 | 252.3699424 | -0.280286624 | 0.121173542 | -2.313100854 | 0.020717095 | 0.059487537 |
| ENSG00000290576 | 24.65438527 | 0.268142047  | 0.348285024 | 0.769892553  | 0.441363632 | 0.60654127  |
| ENSG00000290588 | 26.27023372 | -0.63437436  | 0.351966639 | -1.802370705 | 0.071487101 | 0.161651531 |
| ENSG00000290591 | 27.46195987 | -0.160387105 | 0.335076917 | -0.478657575 | 0.632182252 | 0.761927421 |
| ENSG00000290600 | 32.67739197 | 0.153176668  | 0.32848145  | 0.466317561  | 0.640988211 | 0.768258186 |
| ENSG00000290654 | 29.01443199 | -0.464427173 | 0.329217869 | -1.410698555 | 0.158333517 | 0.296587667 |
| ENSG00000290682 | 52.48505855 | -0.024201598 | 0.268037083 | -0.090291975 | 0.928055197 | 0.960813764 |
| ENSG00000290683 | 14.42837069 | -0.383851615 | 0.460250767 | -0.834005379 | 0.404277953 | 0.57241129  |
| ENSG00000290687 | 8.692565507 | 0.084580831  | 0.653923946 | 0.129343529  | 0.89708583  | 0.944134611 |
| ENSG00000290706 | 15.86907086 | -0.884606268 | 0.468235762 | -1.889232605 | 0.058860668 | 0.138564739 |
| ENSG00000290707 | 12.83169173 | 0.48622409   | 0.502342041 | 0.96791439   | 0.333087127 | 0.505387219 |
| ENSG00000290712 | 9.157783854 | -0.654271534 | 0.568320868 | -1.15123616  | 0.249635093 | 0.413789489 |
| ENSG00000290738 | 16.39181505 | 0.620364858  | 0.425650667 | 1.457450688  | 0.144992014 | 0.278010213 |
| ENSG00000290746 | 61.4227179  | 0.664138375  | 0.231895985 | 2.863949437  | 0.004183948 | 0.015399522 |
| ENSG00000290762 | 13.53607233 | 0.26935137   | 0.486175128 | 0.554021286  | 0.579564278 | 0.722800027 |
| ENSG00000290770 | 340.9656643 | -0.21057458  | 0.128945531 | -1.633050618 | 0.102458351 | 0.213754163 |
| ENSG00000290791 | 61.49469343 | -0.021828357 | 0.221495418 | -0.098549925 | 0.92149563  | 0.956727767 |
| ENSG00000290792 | 39.92256848 | -0.688982035 | 0.284688424 | -2.420126623 | 0.015515103 | 0.046889126 |
| ENSG00000290796 | 26.93035815 | -0.247047214 | 0.363757754 | -0.679153119 | 0.497040848 | 0.655435794 |
| ENSG00000290832 | 25.55746782 | 0.581478543  | 0.349695692 | 1.662813003  | 0.096349873 | 0.203737267 |
| ENSG00000290835 | 27.80236745 | 0.204396767  | 0.335671865 | 0.608918377  | 0.542578543 | 0.691866448 |
| ENSG00000290842 | 34.72129462 | 0.76381962   | 0.297912346 | 2.563907234  | 0.01035012  | 0.033269597 |
| ENSG00000290854 | 7.376039285 | 0.412894044  | 0.636869982 | 0.64831764   | 0.516779527 | 0.671712966 |
| ENSG00000290865 | 34.45035344 | 0.309722257  | 0.31529206  | 0.982334467  | 0.3259351   | 0.498086417 |
| ENSG00000290867 | 10.49523009 | -0.821599965 | 0.549037574 | -1.496436681 | 0.134539897 | 0.263178099 |
| ENSG00000290872 | 11.11877105 | 0.210824808  | 0.530320988 | 0.39754189   | 0.690967902 | 0.805479346 |
| ENSG00000290873 | 22.89789258 | -0.07724541  | 0.363064314 | -0.212759579 | 0.831514493 | 0.901477895 |
| ENSG00000290890 | 19.79946316 | 0.098471421  | 0.414046585 | 0.237826912  | 0.812015345 | 0.889455673 |

|                 |             |              |             |              |             |             |
|-----------------|-------------|--------------|-------------|--------------|-------------|-------------|
| ENSG00000290907 | 15.85313065 | -0.571245547 | 0.443427645 | -1.288249736 | 0.197659044 | 0.349203445 |
| ENSG00000290920 | 15.0601738  | 0.904630537  | 0.455301104 | 1.98688413   | 0.046935239 | 0.116091213 |
| ENSG00000290921 | 38.17089421 | 0.001907556  | 0.283237743 | 0.006734824  | 0.994626429 | 0.99758811  |
| ENSG00000290927 | 26.69394616 | 0.035136148  | 0.333452362 | 0.105370817  | 0.916081571 | 0.954614083 |
| ENSG00000290928 | 41.5308825  | -0.025615651 | 0.287958515 | -0.088956048 | 0.92911684  | 0.961351227 |
| ENSG00000290931 | 122.1806726 | -0.222750639 | 0.16431358  | -1.355643514 | 0.17521262  | 0.319720924 |
| ENSG00000290937 | 15.37277282 | 0.059759665  | 0.437171015 | 0.136696311  | 0.891270845 | 0.94027635  |
| ENSG00000290945 | 41.44329169 | -0.455349896 | 0.296530683 | -1.53559116  | 0.124638684 | 0.248869878 |
| ENSG00000290948 | 16.83191703 | -0.089075186 | 0.414188733 | -0.215059413 | 0.829720997 | 0.900563348 |
| ENSG00000290989 | 55.66439783 | 0.491811482  | 0.242176969 | 2.030793777  | 0.042275919 | 0.107013417 |
| ENSG00000290993 | 47.33287357 | 0.126303393  | 0.256617819 | 0.492184814  | 0.622588699 | 0.75505595  |
| ENSG00000290994 | 26.30180865 | -0.500336957 | 0.339385645 | -1.474243137 | 0.140416139 | 0.271518409 |
| ENSG00000291003 | 12.5038522  | -0.811967658 | 0.524441106 | -1.548253273 | 0.12156133  | 0.244392729 |
| ENSG00000291006 | 39.83404131 | -0.160814704 | 0.276677482 | -0.581235244 | 0.561081917 | 0.7074971   |
| ENSG00000291015 | 30.08015021 | -0.547609452 | 0.322078441 | -1.700236283 | 0.08908649  | 0.191785123 |
| ENSG00000291027 | 17.12611789 | 0.660389354  | 0.431585974 | 1.530145542  | 0.125980708 | 0.250907557 |
| ENSG00000291035 | 76.29255421 | 0.182946783  | 0.208233672 | 0.878564839  | 0.379637267 | 0.549203367 |
| ENSG00000291040 | 22.11980299 | 0.590341804  | 0.371143719 | 1.590601629  | 0.111699258 | 0.228656291 |
| ENSG00000291041 | 10.97555476 | -0.350138994 | 0.539291925 | -0.649256883 | 0.51617235  | 0.671234308 |
| ENSG00000291043 | 20.35362258 | 0.725737708  | 0.383005443 | 1.894849594  | 0.058112331 | 0.13717088  |
| ENSG00000291044 | 24.06805103 | 0.584982404  | 0.352042642 | 1.66168053   | 0.096576847 | 0.204032933 |
| ENSG00000291049 | 24.08036712 | -0.006369412 | 0.350101528 | -0.018193044 | 0.985484852 | 0.992555924 |
| ENSG00000291050 | 11.05689492 | 1.207088825  | 0.543046615 | 2.222808856  | 0.026228692 | 0.072199575 |
| ENSG00000291054 | 12.84010878 | -0.215345795 | 0.480031113 | -0.448607995 | 0.653714465 | 0.777735843 |
| ENSG00000291055 | 34.42264821 | 0.364025037  | 0.30500897  | 1.193489612  | 0.232677678 | 0.392697747 |
| ENSG00000291060 | 12.89977235 | 0.471441329  | 0.486449797 | 0.969146933  | 0.332471884 | 0.504890006 |
| ENSG00000291063 | 30.69890317 | 0.99901231   | 0.328498222 | 3.041149821  | 0.002356765 | 0.009388963 |
| ENSG00000291064 | 20.57196025 | -0.179643182 | 0.416469797 | -0.431347443 | 0.666215758 | 0.786348438 |
| ENSG00000291067 | 15.02889987 | 0.35905656   | 0.445848353 | 0.805333377  | 0.420627326 | 0.588266831 |
| ENSG00000291068 | 48.37156401 | 0.328660808  | 0.254200328 | 1.292920469  | 0.196038567 | 0.347103126 |
| ENSG00000291069 | 14.16614581 | -0.309545953 | 0.458578116 | -0.675012484 | 0.499667834 | 0.657810127 |
| ENSG00000291071 | 33.76740417 | -0.102848721 | 0.314412474 | -0.327113997 | 0.743581666 | 0.843162065 |
| ENSG00000291072 | 57.31982544 | 0.397219659  | 0.243765719 | 1.629514028  | 0.103204248 | 0.21493107  |
| ENSG00000291073 | 22.16707577 | 0.362791597  | 0.391358127 | 0.927006679  | 0.353923067 | 0.525367993 |
| ENSG00000291074 | 14.48993075 | 1.026531433  | 0.494219225 | 2.077077096  | 0.037794444 | 0.097277032 |
| ENSG00000291075 | 53.05667536 | -0.244905231 | 0.254774736 | -0.961261839 | 0.33642053  | 0.508303667 |
| ENSG00000291078 | 11.36038251 | -0.239952867 | 0.518026666 | -0.463205627 | 0.643216983 | 0.769810766 |
| ENSG00000291079 | 11.86893707 | -0.468922031 | 0.520870046 | -0.900266842 | 0.367978262 | 0.539391699 |
| ENSG00000291080 | 57.985272   | -0.246015807 | 0.245565424 | -1.001834064 | 0.316423742 | 0.488011013 |
| ENSG00000291081 | 21.03402563 | -0.332817157 | 0.387071014 | -0.859834875 | 0.389880072 | 0.558214797 |
| ENSG00000291087 | 37.85680322 | 0.329996841  | 0.297152348 | 1.110530821  | 0.266770355 | 0.433517257 |
| ENSG00000291088 | 7.694404616 | 0.252900317  | 0.615553455 | 0.410850293  | 0.681182313 | 0.798112265 |
| ENSG00000291091 | 25.39237267 | 0.697338295  | 0.346226316 | 2.014111186  | 0.043997861 | 0.110423076 |
| ENSG00000291092 | 11.09719766 | 0.534852575  | 0.56129057  | 0.952897846  | 0.340641831 | 0.512421911 |
| ENSG00000291093 | 59.39426832 | -0.055057494 | 0.236680586 | -0.232623616 | 0.816053687 | 0.891910855 |
| ENSG00000291100 | 29.28268539 | -0.269747408 | 0.327908106 | -0.822631107 | 0.410717804 | 0.579077887 |
| ENSG00000291102 | 26.9009456  | -0.475894243 | 0.359017795 | -1.325545    | 0.184990454 | 0.332807494 |
| ENSG00000291104 | 13.47174783 | -0.824485501 | 0.487401519 | -1.691594031 | 0.090723405 | 0.194593323 |
| ENSG00000291106 | 20.89421569 | -0.366422035 | 0.400683527 | -0.914492388 | 0.360458176 | 0.531753413 |
| ENSG00000291110 | 8.106929226 | 0.031034673  | 0.626060794 | 0.04957134   | 0.960463986 | 0.979002801 |



|                 |             |              |             |              |             |             |
|-----------------|-------------|--------------|-------------|--------------|-------------|-------------|
| ENSG00000291113 | 75.83888619 | 0.670111975  | 0.211096936 | 3.174427772  | 0.001501323 | 0.006396444 |
| ENSG00000291117 | 34.0407543  | 0.222036904  | 0.305713917 | 0.726289814  | 0.467661122 | 0.629756504 |
| ENSG00000291118 | 148.4638263 | -0.362326013 | 0.148807376 | -2.434865949 | 0.014897307 | 0.045265516 |
| ENSG00000291120 | 10.65492545 | 0.240813425  | 0.528157721 | 0.455949834  | 0.648426053 | 0.773796594 |
| ENSG00000291122 | 31.5958413  | -0.873761493 | 0.3146042   | -2.777335755 | 0.005480653 | 0.01932398  |
| ENSG00000291129 | 15.59376643 | -0.32553018  | 0.457883377 | -0.710945618 | 0.477117936 | 0.637712665 |
| ENSG00000291132 | 14.59444322 | -0.241971002 | 0.448894956 | -0.539037025 | 0.589861307 | 0.731184414 |
| ENSG00000291133 | 66.32370413 | 0.230510843  | 0.234557602 | 0.982747272  | 0.325731838 | 0.497884128 |
| ENSG00000291136 | 125.8114189 | 0.051585569  | 0.175213429 | 0.294415612  | 0.768440339 | 0.860787994 |
| ENSG00000291137 | 13.01365833 | 0.108462309  | 0.478302641 | 0.226765023  | 0.820606463 | 0.894680145 |
| ENSG00000291138 | 9.128831401 | -1.833965683 | 0.634402247 | -2.890856222 | 0.003841938 | 0.014292296 |
| ENSG00000291140 | 21.87647259 | 0.013864883  | 0.372275112 | 0.037243646  | 0.970290738 | 0.984518492 |
| ENSG00000291141 | 25.14046099 | -0.111752965 | 0.351056993 | -0.318332828 | 0.750232485 | 0.84850184  |
| ENSG00000291142 | 17.49138535 | 0.411084924  | 0.445906879 | 0.921907562  | 0.356576794 | 0.527856911 |
| ENSG00000291145 | 9.750070644 | -0.00564572  | 0.547204035 | -0.010317395 | 0.991768056 | 0.995808855 |
| ENSG00000291146 | 12.56163342 | 0.560372358  | 0.493914705 | 1.134552895  | 0.256562699 | 0.422352776 |
| ENSG00000291147 | 8.844678958 | 0.467696639  | 0.588804816 | 0.794315241  | 0.427011934 | 0.594296704 |
| ENSG00000291152 | 48.08773402 | 0.094107409  | 0.254014388 | 0.370480625  | 0.71102441  | 0.819206028 |
| ENSG00000291153 | 44.60673635 | -0.213423604 | 0.2584841   | -0.825674011 | 0.408989039 | 0.577621114 |
| ENSG00000291154 | 21.25508743 | -0.198819075 | 0.382683047 | -0.519539802 | 0.603384364 | 0.741253138 |
| ENSG00000291158 | 15.80152861 | -0.092614599 | 0.434832486 | -0.212989143 | 0.831335431 | 0.901477895 |
| ENSG00000291159 | 93.23597272 | 0.840751518  | 0.190677169 | 4.409293066  | 1.04E-05    | 7.41E-05    |
| ENSG00000291171 | 188.965407  | 0.120909395  | 0.133926979 | 0.902800888  | 0.36663158  | 0.537922895 |
| ENSG00000291174 | 65.35394326 | 0.148981842  | 0.218730661 | 0.681120064  | 0.495795522 | 0.654552604 |
| ENSG00000291175 | 63.39964685 | -0.023652585 | 0.228756301 | -0.103396431 | 0.917648344 | 0.955355281 |
| ENSG00000291176 | 10.34718272 | -1.130991364 | 0.557662471 | -2.028093018 | 0.042550755 | 0.107540565 |
| ENSG00000291177 | 8.631150476 | 0.446211194  | 0.610297279 | 0.731137446  | 0.464695204 | 0.627409989 |
| ENSG00000291178 | 71.60673765 | 0.080404564  | 0.205998018 | 0.390317175  | 0.696302024 | 0.809436951 |
| ENSG00000291182 | 14.73137431 | -0.330705346 | 0.454293993 | -0.727954477 | 0.466641453 | 0.628895314 |
| ENSG00000291185 | 43.12292992 | 0.465762649  | 0.272532168 | 1.709018985  | 0.087447433 | 0.188922499 |
| ENSG00000291186 | 68.55443376 | 0.424486726  | 0.210113978 | 2.02026886   | 0.043355507 | 0.109122883 |
| ENSG00000291201 | 175.3168214 | 0.219886303  | 0.142896112 | 1.538784359  | 0.123856949 | 0.247978701 |
| ENSG00000291202 | 104.4032182 | 0.044380735  | 0.175481514 | 0.252908321  | 0.800339059 | 0.880924836 |
| ENSG00000291203 | 138.6654117 | -0.118630016 | 0.151161743 | -0.784788622 | 0.432577512 | 0.598956759 |
| ENSG00000291207 | 81.82307081 | -0.075299211 | 0.199796955 | -0.376878674 | 0.706263771 | 0.815661201 |
| ENSG00000291208 | 61.98283508 | -0.1930713   | 0.225450198 | -0.856381151 | 0.391786987 | 0.560088725 |
| ENSG00000291212 | 22.36796887 | -0.199021403 | 0.378031383 | -0.526467938 | 0.598563123 | 0.737415909 |
| ENSG00000291214 | 89.212706   | 0.095337206  | 0.190653766 | 0.500054146  | 0.617036952 | 0.751149845 |
| ENSG00000291215 | 39.82335704 | -0.205937187 | 0.286398154 | -0.719059057 | 0.472104532 | 0.633819399 |
| ENSG00000291220 | 8.720860482 | -0.596386271 | 0.58155081  | -1.025510173 | 0.305122528 | 0.476122656 |
| ENSG00000291223 | 61.18420172 | 0.113333209  | 0.227680547 | 0.497772915  | 0.618644108 | 0.752323937 |
| ENSG00000291224 | 170.8120931 | -0.296853138 | 0.147036686 | -2.018905261 | 0.043497067 | 0.109361608 |
| ENSG00000291228 | 41.03100765 | 0.582762378  | 0.278778194 | 2.090415931  | 0.036580453 | 0.09485797  |
| ENSG00000291237 | 416.3822987 | -0.093071459 | 0.099735356 | -0.933184205 | 0.350724868 | 0.522500564 |
| ENSG00000291242 | 8.638099348 | 0.669902625  | 0.701842041 | 0.954492017  | 0.339834648 | 0.511646013 |
| ENSG00000291258 | 35.9569744  | -1.167734621 | 0.312829675 | -3.732812824 | 0.000189353 | 0.001020271 |
| ENSG00000291272 | 27.60309966 | 0.509891151  | 0.333597712 | 1.528461175  | 0.126398076 | 0.25141798  |
| ENSG00000291299 | 45.74573297 | -0.092479477 | 0.257889814 | -0.358600734 | 0.719893797 | 0.825834885 |
| ENSG00000291317 | 29.95566666 | 0.220369525  | 0.351804157 | 0.626398298  | 0.531053725 | 0.683094573 |
