# Supplementary material for: A Stem-like Patient-Derived Ovarian Cancer Model of Platinum Resistance Reveals Dissociation of Stemness and Resistance
Source: MDPI journal article supplement (doi:10.3390/ijms25073843), 2024-03-29
Supplement: s1 [file s1]

### Ingenuity Canonical Pathways

### Microautophagy Signaling Pathway

## Autophagy

### Chaperone Mediated Autophagy

### Late endosomal microautophagy

## Macroautophagy

### Chaperone Mediated Autophagy Signaling Pathway
