# Supplementary material for: A Stem-like Patient-Derived Ovarian Cancer Model of Platinum Resistance Reveals Dissociation of Stemness and Resistance
Source: MDPI journal article supplement (doi:10.3390/ijms25073843), 2024-03-29
Supplement: s1 [file s1]

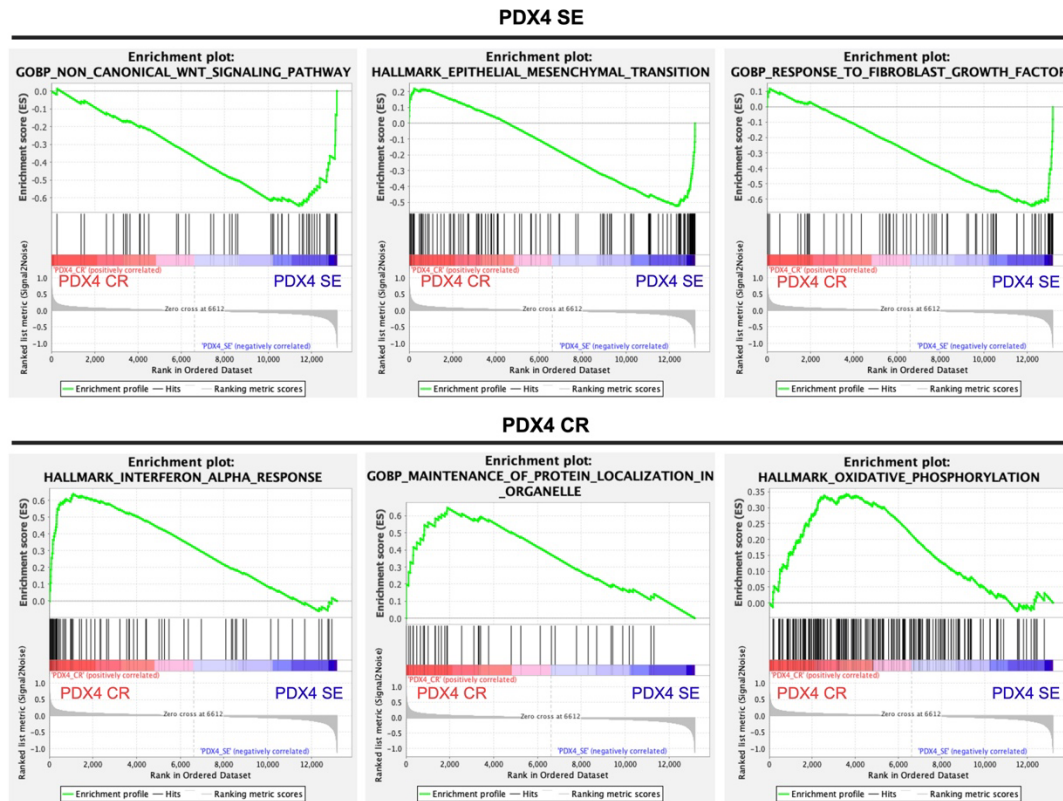

**Figure S6. Gene set enrichment analysis for cisplatin sensitive and resistant PDX4.** PDX4 SE had an enrichment in genes associated with non-canonical Wnt signaling, epithelial-mesenchymal transition, and response to fibroblast growth factor. PDX4 CR had an enrichment in genes associated with interferon alpha response, maintenance of protein localization in organelle, and oxidative phosphorylation.
