# Supplementary material for: A Stem-like Patient-Derived Ovarian Cancer Model of Platinum Resistance Reveals Dissociation of Stemness and Resistance
Source: MDPI journal article supplement (doi:10.3390/ijms25073843), 2024-03-29
Supplement: s1 [file s1]

|                   |              |            |            |             |  |             |             |             |             |             |
|-------------------|--------------|------------|------------|-------------|--|-------------|-------------|-------------|-------------|-------------|
| hsa-miR-6128      |              |            |            | 0           |  | 0           |             | 0           |             | 0           |
| hsa-miR-378i      | 1.47380164   | 0.18930182 | 0.06054791 | 30.96093286 |  | 37.99537321 | 48.481167   | 19.93709201 | 26.15310077 | 32.16657665 |
| hsa-miR-422a      | 1.330899224  | 0.61493375 | 0.40486879 | 3.636212608 |  | 4.993511634 | 6.323630479 | 1.949489494 | 3.689326514 | 4.984273004 |
| hsa-miR-378f      | 1.014864501  | 0.9772691  | 0.96272307 | 6.323630479 |  | 7.167460772 | 8.484496086 | 4.873723736 | 7.346816636 | 10.96540061 |
| hsa-miR-378b      | 1.514045233  |            | 0.70086641 |             |  | 0.454583725 | 0.836781969 | 0           | 0.172259043 | 0.51677713  |
| hsa-miR-378d      | 1.410097284  | 0.40828805 | 0.20801829 | 10.90863782 |  | 13.5135128  | 17.91695302 | 7.974836806 | 9.982835622 | 12.67168171 |
| hsa-miR-378c      | 2.361157976  | 0.39744107 | 0.19785023 | 1.053938413 |  | 2.149973043 | 4.183909846 | 0.51677713  | 0.829458826 | 0.996854601 |
| hsa-miR-378a-3p   | 1.305352978  | 0.15610166 | 0.04580501 | 1412.668598 |  | 1756.663279 | 2321.826324 | 1216.162613 | 1346.541139 | 1596.631896 |
| hsa-miR-378e      | -1.517798015 |            | 0.58189746 | 0           |  | 0.526969207 | 1.58090762  | 0           | 0.841692046 | 1.550331391 |
| hsa-miR-378h      | -1.022063801 | 0.9772691  | 0.96794805 | 0           |  | 1.308661043 | 2.107876826 | 0           | 1.491521878 | 2.924234241 |
| hsa-miR-378j      |              |            |            | 0           |  | 0           | 0           | 0           | 0           | 0           |
| hsa-miR-6868-5p   |              |            |            | 0           |  | 0           | 0           | 0           | 0           | 0           |
| hsa-miR-4799-3p   |              |            |            | 0           |  | 0           | 0           | 0           | 0           | 0           |
| hsa-miR-5588-5p   |              |            |            | 0           |  | 0           | 0           | 0           | 0           | 0           |
| hsa-miR-3176      | -1.786135382 | 0.53093569 | 0.303143   | 0.606035435 |  | 1.534877548 | 3.161815239 | 0.996854601 | 3.123466407 | 6.82321323  |
| hsa-miR-664a-5p   | -1.194835749 | 0.70512731 | 0.50336825 | 9.090531521 |  | 10.2417459  | 11.59332254 | 7.974836806 | 12.46870542 | 17.54540545 |
| hsa-miR-4646-5p   |              |            |            | 0           |  | 0           | 0           | 0           | 0           | 0           |
| hsa-miR-6506-5p   |              |            |            | 0           |  | 0           | 0           | 0           | 0           | 0           |
| hsa-miR-6860      |              |            |            | 0           |  | 0           | 0           | 0           | 0           | 0           |
| hsa-miR-378g      | 1.058339689  | 0.94510719 | 0.88164014 | 1.212070869 |  | 4.113078906 | 5.857473784 | 2.924234241 | 3.841982386 | 4.984273004 |
| hsa-miR-4667-5p   | -1.127219659 |            | 0.9209974  | 0           |  | 0.202011812 | 0.606035435 | 0           | 0.324914916 | 0.974744747 |
| hsa-miR-637       |              |            |            | 0           |  | 0           | 0           | 0           | 0           | 0           |
| hsa-miR-6861-5p   |              |            |            | 0           |  | 0           | 0           | 0           | 0           | 0           |
| hsa-miR-20b-3p    | -2.81592411  | 0.31708658 |            | 0           |  | 0.202011812 | 0.606035435 | 0           | 0.51677713  | 1.550331391 |
| hsa-miR-6773-3p   |              |            |            | 0           |  | 0           | 0           | 0           | 0           | 0           |
| hsa-miR-367-5p    |              |            |            | 0           |  | 0           | 0           | 0           | 0           | 0           |
| hsa-miR-302a-5p   |              |            |            | 0           |  | 0           | 0           | 0           | 0           | 0           |
| hsa-miR-600       |              |            |            | 0           |  | 0           | 0           | 0           | 0           | 0           |
| hsa-miR-412-3p    |              |            |            | 0           |  | 0           | 0           | 0           | 0           | 0           |
| hsa-miR-635       |              |            |            | 0           |  | 0           | 0           | 0           | 0           | 0           |
| hsa-miR-6774-5p   |              |            |            | 0           |  | 0           | 0           | 0           | 0           | 0           |
| hsa-miR-643       | 1.157524452  | 0.78649401 | 0.60623188 | 5.020691815 |  | 8.56818196  | 11.59332254 | 6.82321323  | 7.688828041 | 8.268434087 |
| hsa-miR-302b-5p   |              |            |            | 0           |  | 0           | 0           | 0           | 0           | 0           |
| hsa-miR-302d-5p   |              |            |            | 0           |  | 0           | 0           | 0           | 0           | 0           |
| hsa-miR-3124-3p   |              |            |            | 0           |  | 0           | 0           | 0           | 0           | 0           |
| hsa-miR-5681a     |              |            |            | 0           |  | 0           | 0           | 0           | 0           | 0           |
| hsa-miR-6730-5p   |              |            |            | 0           |  | 0           | 0           | 0           | 0           | 0           |
| hsa-miR-4680-5p   |              |            |            | 0           |  | 0           | 0           | 0           | 0           | 0           |
| hsa-miR-3185      |              |            |            | 0           |  | 0           | 0           | 0           | 0           | 0           |
| hsa-miR-10522-5p  |              |            |            | 0           |  | 0           | 0           | 0           | 0           | 0           |
| hsa-miR-4699-5p   |              |            |            | 0           |  | 0           | 0           | 0           | 0           | 0           |
| hsa-miR-1252-5p   |              |            |            | 0           |  | 0           | 0           | 0           | 0           | 0           |
| hsa-miR-605-3p    | 1.858416833  | 0.56165999 | 0.34847517 | 0.836781969 |  | 1.411931964 | 1.818106304 | 0           | 0.982114698 | 1.949489494 |
| hsa-miR-4493      |              |            |            | 0           |  | 0           | 0           | 0           | 0           | 0           |
| hsa-miR-7515      |              |            |            | 0           |  | 0           | 0           | 0           | 0           | 0           |
| hsa-miR-3179      | -1.155733934 | 0.87485783 |            | 0           |  | 0.454583725 | 0.836781969 | 0           | 0.497173959 | 0.974744747 |
| hsa-miR-548ao-5p  |              |            |            | 0           |  | 0           | 0           | 0           | 0           | 0           |
| hsa-miR-548ax     |              |            |            | 0           |  | 0           | 0           | 0           | 0           | 0           |
| hsa-miR-4795-5p   |              |            |            | 0           |  | 0           | 0           | 0           | 0           | 0           |
| hsa-miR-10393-5p  |              |            |            | 0           |  | 0           | 0           | 0           | 0           | 0           |
| hsa-miR-219b-3p   | 1.357941266  | 0.66097827 |            | 0.526969207 |  | 1.214450183 | 2.510345907 | 0           | 0.836828777 | 1.993709202 |
| hsa-miR-219a-2-3p |              |            |            | 0           |  | 0           | 0           | 0           | 0           | 0           |
| hsa-miR-642a-3p   | -3.663705919 | 0.01343303 | 0.001981   | 1.212070869 |  | 2.367129487 | 4.215753652 | 4.650994174 | 9.746903796 | 14.62117121 |
| hsa-miR-642b-3p   |              |            |            | 0           |  | 0           | 0           | 0           | 0           | 0           |
| hsa-miR-3117-5p   |              |            |            | 0           |  | 0           | 0           | 0           | 0           | 0           |
| hsa-miR-4645-3p   | 2.721573948  | 0.37049535 |            | 0           |  | 0.702625609 | 2.107876826 | 0           | 0.172259043 | 0.51677713  |
| hsa-miR-3913-3p   | 2.767096596  | 0.32484423 |            | 0           |  | 0.781691837 | 1.818106304 | 0           | 0.172259043 | 0.51677713  |
| hsa-miR-591       |              |            |            | 0           |  | 0           | 0           | 0           | 0           | 0           |
| hsa-miR-4725-5p   |              |            |            | 0           |  | 0           | 0           | 0           | 0           | 0           |
| hsa-miR-504-5p    | -6.710501692 | 0.25817211 |            | 0           |  | 0           | 0           | 0           | 0.344518087 | 1.033554261 |
| hsa-miR-631       |              |            |            | 0           |  | 0           | 0           | 0           | 0           | 0           |
| hsa-miR-6855-3p   | -1.650726203 | 0.55365274 |            | 0           |  | 0.454583725 | 0.836781969 | 0           | 0.676802954 | 1.033554261 |
| hsa-miR-4513      |              |            |            | 0           |  | 0           | 0           | 0           | 0           | 0           |
| hsa-miR-617       |              |            |            | 0           |  | 0           | 0           | 0           | 0           | 0           |
| hsa-miR-1253      |              |            |            | 0           |  | 0           | 0           | 0           | 0           | 0           |
| hsa-miR-6088      |              |            |            | 0           |  | 0           | 0           | 0           | 0           | 0           |
| hsa-miR-4708-5p   |              |            |            | 0           |  | 0           | 0           | 0           | 0           | 0           |
| hsa-miR-5186      |              |            |            | 0           |  | 0           | 0           | 0           | 0           | 0           |
| hsa-miR-4468      |              |            |            | 0           |  | 0           | 0           | 0           | 0           | 0           |
| hsa-miR-3670      |              |            |            | 0           |  | 0           | 0           | 0           | 0           | 0           |
| hsa-miR-3160-3p   | 3.543845864  | 0.51085051 |            | 0           |  | 0.202011812 | 0.606035435 | 0           | 0           | 0           |
| hsa-miR-4487      |              |            |            | 0           |  | 0           | 0           | 0           | 0           | 0           |
| hsa-miR-27b-5p    | -1.893899379 | 0.19063229 | 0.06261645 | 3.347127876 |  | 4.786969792 | 7.377568892 | 5.848468483 | 8.914244517 | 12.91942826 |
| hsa-miR-4751      |              |            |            | 0           |  | 0           | 0           | 0           | 0           | 0           |
| hsa-miR-1185-5p   |              |            |            | 0           |  | 0           | 0           | 0           | 0           | 0           |
| hsa-miR-6884-5p   | 3.544185779  | 0.5108146  |            | 0           |  | 0.278927323 | 0.836781969 | 0           | 0           | 0           |
| hsa-miR-485-5p    |              |            |            | 0           |  | 0           | 0           | 0           | 0           | 0           |
| hsa-miR-3188      | 1.357818876  | 0.66107824 |            | 0.526969207 |  | 1.137534671 | 1.673563938 | 0.51677713  | 0.829458826 | 0.996854601 |
| hsa-miR-4458      | -1.438654489 | 0.50304972 | 0.2820016  | 2.510345907 |  | 3.80541686  | 5.269692065 | 3.987418403 | 5.975964144 | 8.772702724 |
| hsa-let-7d-5p     | 1.656946787  | 0.001084   | 0.0001314  | 511.2737831 |  | 608.5019204 | 682.3958995 | 331.952582  | 367.3056366 | 385.9989199 |
| hsa-miR-202-3p    |              |            |            | 0           |  | 0           | 0           | 0           | 0           | 0           |
| hsa-miR-655-5p    |              |            |            | 0           |  | 0           | 0           | 0           | 0           | 0           |
| hsa-miR-377-5p    |              |            |            | 0           |  | 0           | 0           | 0           | 0           | 0           |
| hsa-miR-4785      |              |            |            | 0           |  | 0           | 0           | 0           | 0           | 0           |
| hsa-miR-924       |              |            |            | 0           |  | 0           | 0           | 0           | 0           | 0           |
| hsa-miR-4424      |              |            |            | 0           |  | 0           | 0           | 0           | 0           | 0           |
| hsa-miR-219a-1-3p | -1.285301594 | 0.75962047 | 0.55026385 | 0.836781969 |  | 2.342924794 | 3.161815239 | 2.990563802 | 3.330068524 | 3.898978988 |
| hsa-miR-3145-3p   | -1.155569477 | 0.88129843 |            | 0           |  | 0.557854646 | 1.673563938 | 0           | 0.50454391  | 0.996854601 |
| hsa-miR-383-5p    | -167.9604199 | 2.221E-18  | 6.16E-20   | 0           |  | 0.733511048 | 1.673563938 | 109.1714117 | 118.5170531 | 130.744614  |
| hsa-miR-369-5p    | -9.588952533 | 0.1693546  |            | 0           |  | 0           | 0           | 0.51677713  | 0.829458826 | 0.996854601 |
| hsa-miR-3171      |              |            |            | 0           |  | 0           | 0           | 0           | 0           | 0           |
| hsa-miR-219b-5p   | 1.044328942  | 0.96119655 | 0.92050356 | 0.836781969 |  | 2.89624941  | 4.215753652 | 1.949489494 | 3.01252356  | 3.987418403 |
| hsa-miR-4445-5p   |              |            |            | 0           |  | 0           | 0           | 0           | 0           | 0           |
| hsa-miR-1468-3p   |              |            |            | 0           |  | 0           | 0           | 0           | 0           | 0           |
| hsa-miR-4708-3p   |              |            |            | 0           |  | 0           | 0           | 0           | 0           | 0           |
| hsa-miR-8064      |              |            |            | 0           |  | 0           | 0           | 0           | 0           | 0           |
| hsa-miR-298       |              |            |            | 0           |  | 0           | 0           | 0           | 0           | 0           |
| hsa-miR-4771      |              |            |            | 0           |  | 0           | 0           | 0           | 0           | 0           |
| hsa-miR-2467-3p   |              |            |            | 0           |  | 0           | 0           | 0           | 0           | 0           |
| hsa-miR-107       | 1.074392569  | 0.76108188 | 0.55422118 | 1491.982251 |  | 1624.963274 | 1781.155918 | 1336.385659 | 1514.817557 | 1793.530335 |
| hsa-miR-103a-3p   | 1.046824526  | 0.8380233  | 0.68131512 | 17545.93791 |  | 19546.95214 | 22229.66901 | 17241.59717 | 18673.96734 | 20800.07816 |
| hsa-miR-6132      |              |            |            | 0           |  | 0           | 0           | 0           | 0           | 0           |
| hsa-miR-3665      |              |            |            | 0           |  | 0           | 0           | 0           | 0           | 0           |
| hsa-miR-6499-3p   |              |            |            | 0           |  | 0           | 0           | 0           | 0           | 0           |
| hsa-miR-5689      | 3.543660986  | 0.51087004 |            | 0           |  | 0.175656402 | 0.526969207 | 0           | 0           | 0           |
| hsa-miR-6076      |              |            |            | 0           |  | 0           | 0           | 0           | 0           | 0           |
| hsa-miR-4480      | 3.543845864  | 0.51085051 |            | 0           |  | 0.202011812 | 0.606035435 | 0           | 0           | 0           |
| hsa-miR-4755-3p   | 3.543660986  | 0.51087004 |            | 0           |  | 0.175656402 | 0.526969207 | 0           | 0           | 0           |
| hsa-miR-4313      |              |            |            | 0           |  | 0           | 0           | 0           | 0           | 0           |
| hsa-miR-210-5p    | 3.543660986  | 0.51087004 |            | 0           |  | 0.175656402 | 0.526969207 | 0           | 0           | 0           |
| hsa-miR-4707-3p   |              |            |            | 0           |  | 0           | 0           | 0           | 0           | 0           |
| hsa-miR-3648      | -3.835816219 | 0.44917283 |            | 0           |  | 0           | 0           | 0           | 0.172259043 | 0.51677713  |
| hsa-miR-6743-3p   |              |            |            | 0           |  | 0           | 0           | 0           | 0           | 0           |

|                   |              |            |            |             |             |             |             |             |            |             |
|-------------------|--------------|------------|------------|-------------|-------------|-------------|-------------|-------------|------------|-------------|
| hsa-miR-6811-3p   |              |            |            | 0           |             | 0           |             | 0           |            | 0           |
| hsa-miR-5581-5p   |              |            |            | 0           |             | 0           |             | 0           |            | 0           |
| hsa-miR-381-5p    | -6.71207816  |            | 0.25810492 |             |             | 0           |             | 0           | 0.50454391 | 0.996854601 |
| hsa-miR-2277-5p   | 1.881331031  | 0.1682263  | 0.05108186 | 7.531037722 | 16.92314133 | 26.87542953 | 4.650994174 | 9.407248978 |            | 15.59591595 |
| hsa-miR-4706      |              |            |            | 0           |             | 0           |             | 0           |            | 0           |
| hsa-miR-4746-3p   |              |            |            | 0           |             | 0           |             | 0           |            | 0           |
| hsa-miR-6853-5p   |              |            |            | 0           |             | 0           |             | 0           |            | 0           |
| hsa-miR-548v      |              |            |            | 0           |             | 0           |             | 0           |            | 0           |
| hsa-miR-222-3p    | -1.205468984 | 0.35867223 | 0.16127716 | 110.4552199 | 134.0018052 | 161.2525772 | 144.5439171 | 163.1978241 |            | 191.0499704 |
| hsa-miR-221-3p    | -1.125065168 | 0.56627984 | 0.35714714 | 4291.942949 | 5065.18534  | 6456.953688 | 4720.242309 | 5700.390626 |            | 6504.471697 |
| hsa-miR-549a-5p   |              |            |            | 0           |             | 0           |             | 0           |            | 0           |
| hsa-miR-7106-3p   |              |            |            | 0           |             | 0           |             | 0           |            | 0           |
| hsa-miR-423-3p    | 1.348250298  | 0.23272127 | 0.08446669 | 431.4972295 | 639.4945254 | 889.5240206 | 375.8141845 | 474.7930271 |            | 667.7001518 |
| hsa-miR-6502-5p   |              |            |            | 0           |             | 0           |             | 0           |            | 0           |
| hsa-miR-3194-3p   |              |            |            | 0           |             | 0           |             | 0           |            | 0           |
| hsa-miR-4663      |              |            |            | 0           |             | 0           |             | 0           |            | 0           |
| hsa-miR-133a-5p   | -1.602885353 | 0.34014857 | 0.15080411 | 2.510345907 | 3.480459465 | 4.242248043 | 4.984273004 | 5.678022351 |            | 6.201325565 |
| hsa-miR-138-5p    | -1.117068891 | 0.93212443 | 0.84469266 | 0.526969207 | 2.070678218 | 4.848283478 | 0.996854601 | 2.187928003 |            | 3.617439913 |
| hsa-miR-1537-5p   | -1.971542787 |            | 0.52490531 | 0           | 0.202011812 | 0.606035435 |             | 0.344518087 |            | 1.033554261 |
| hsa-miR-4718      |              |            |            | 0           |             | 0           |             | 0           |            | 0           |
| hsa-miR-626       |              |            |            | 0           |             | 0           |             | 0           |            | 0           |
| hsa-miR-6876-3p   |              |            |            | 0           |             | 0           |             | 0           |            | 0           |
| hsa-miR-2115-5p   |              |            |            | 0           |             | 0           |             | 0           |            | 0           |
| hsa-miR-103a-2-5p | 2.766423252  |            | 0.303571   | 0           | 0.80589653  | 1.58090762  |             | 0.332284867 |            | 0.996854601 |
| hsa-miR-3140-3p   | -2.486496084 | 0.18930182 | 0.06079767 | 0           | 1.133004641 | 1.818106304 | 2.924234241 | 3.177412652 |            | 3.617439913 |
| hsa-miR-4261      |              |            |            | 0           |             | 0           |             | 0           |            | 0           |
| hsa-miR-5093      |              |            |            | 0           |             | 0           |             | 0           |            | 0           |
| hsa-miR-6828-5p   |              |            |            | 0           |             | 0           |             | 0           |            | 0           |
| hsa-miR-671-5p    | 2.322758454  | 6.973E-08  | 4.784E-09  | 727.8485571 | 961.9517756 | 1266.833973 | 358.6433285 | 414.7570419 |            | 508.816758  |
| hsa-miR-613       |              |            |            | 0           |             | 0           |             | 0           |            | 0           |
| hsa-miR-492       |              |            |            | 0           |             | 0           |             | 0           |            | 0           |
| hsa-miR-659-5p    | 2.587535631  | 0.23448634 | 0.08648404 | 1.212070869 | 2.64605681  | 4.215753652 |             | 0.841692046 |            | 1.550331391 |
| hsa-miR-4740-5p   |              |            |            | 0           |             | 0           |             | 0           |            | 0           |
| hsa-miR-4515      |              |            |            | 0           |             | 0           |             | 0           |            | 0           |
| hsa-miR-4434      |              |            |            | 0           |             | 0           |             | 0           |            | 0           |
| hsa-miR-5703      |              |            |            | 0           |             | 0           |             | 0           |            | 0           |
| hsa-miR-5192      | 3.543660986  |            | 0.51087004 | 0           | 0.175656402 | 0.526969207 |             | 0           |            | 0           |
| hsa-miR-6081      |              |            |            | 0           |             | 0           |             | 0           |            | 0           |
| hsa-miR-4633-3p   |              |            |            | 0           |             | 0           |             | 0           |            | 0           |
| hsa-miR-6500-5p   |              |            |            | 0           |             | 0           |             | 0           |            | 0           |
| hsa-miR-766-5p    | -1.139456557 | 0.78066984 | 0.60060293 | 6.694255753 | 8.801079211 | 10.01241492 | 9.968546008 | 10.34209361 |            | 10.72219222 |
| hsa-miR-7154-3p   |              |            |            | 0           |             | 0           |             | 0           |            | 0           |
| hsa-miR-11181-3p  |              |            |            | 0           |             | 0           |             | 0           |            | 0           |
| hsa-miR-6894-5p   |              |            |            | 0           |             | 0           |             | 0           |            | 0           |
| hsa-miR-650       |              |            |            | 0           |             | 0           |             | 0           |            | 0           |
| hsa-miR-3612      |              |            |            | 0           |             | 0           |             | 0           |            | 0           |
| hsa-miR-6797-5p   |              |            |            | 0           |             | 0           |             | 0           |            | 0           |
| hsa-miR-1249-5p   |              |            |            | 0           |             | 0           |             | 0           |            | 0           |
| hsa-miR-6851-5p   | 8.549500881  |            | 0.23672994 | 0.526969207 | 0.656595537 | 0.836781969 |             | 0           |            | 0           |
| hsa-miR-5191      |              |            |            | 0           |             | 0           |             | 0           |            | 0           |
| hsa-miR-1255a     | 1.544931855  | 0.38453048 | 0.18064295 | 7.904538098 | 8.252284625 | 8.484496086 | 2.924234241 | 5.03556247  |            | 6.201325565 |
| hsa-miR-3167      |              |            |            | 0           |             | 0           |             | 0           |            | 0           |
| hsa-miR-31-5p     | 3.543660986  |            | 0.51087004 | 0           | 0.175656402 | 0.526969207 |             | 0           |            | 0           |
| hsa-miR-593-5p    |              |            |            | 0           |             | 0           |             | 0           |            | 0           |
| hsa-miR-564       |              |            |            | 0           |             | 0           |             | 0           |            | 0           |
| hsa-miR-885-3p    |              |            |            | 0           |             | 0           |             | 0           |            | 0           |
| hsa-miR-4763-3p   |              |            |            | 0           |             | 0           |             | 0           |            | 0           |
| hsa-miR-4736      |              |            |            | 0           |             | 0           |             | 0           |            | 0           |
| hsa-miR-34c-5p    | -2.155051254 | 0.01899888 | 0.002995   | 5.269692065 | 6.739232457 | 9.090531521 | 12.40265113 | 15.32135325 |            | 18.94023741 |
| hsa-miR-449b-5p   | 2.14020261   |            | 0.45908666 | 0.526969207 | 0.656595537 | 0.836781969 |             | 0.332284867 |            | 0.996854601 |
| hsa-miR-3622b-5p  |              |            |            | 0           |             | 0           |             | 0           |            | 0           |
| hsa-miR-1256      | 8.548235796  |            | 0.23676536 | 0           | 0.553324616 | 1.053938413 |             | 0           |            | 0           |
| hsa-miR-4529-5p   |              |            |            | 0           |             | 0           |             | 0           |            | 0           |
| hsa-miR-6775-3p   |              |            |            | 0           |             | 0           |             | 0           |            | 0           |
| hsa-miR-4757-5p   |              |            |            | 0           |             | 0           |             | 0           |            | 0           |
| hsa-miR-6735-5p   | 3.543845864  |            | 0.51085051 | 0           | 0.202011812 | 0.606035435 |             | 0           |            | 0           |
| hsa-miR-6717-5p   |              |            |            | 0           |             | 0           |             | 0           |            | 0           |
| hsa-miR-6722-5p   |              |            |            | 0           |             | 0           |             | 0           |            | 0           |
| hsa-miR-25-5p     | 1.077443469  | 0.83195049 | 0.66555806 | 42.67588042 | 50.75354959 | 65.34418161 | 42.86474783 | 47.41538132 |            | 50.64415878 |
| hsa-miR-663a      |              |            |            | 0           |             | 0           |             | 0           |            | 0           |
| hsa-miR-6822-3p   |              |            |            | 0           |             | 0           |             | 0           |            | 0           |
| hsa-miR-604       |              |            |            | 0           |             | 0           |             | 0           |            | 0           |
| hsa-miR-4430      |              |            |            | 0           |             | 0           |             | 0           |            | 0           |
| hsa-miR-4505      |              |            |            | 0           |             | 0           |             | 0           |            | 0           |
| hsa-miR-7974      | 1.157869241  | 0.71525803 | 0.51164443 | 16.96899217 | 21.69126123 | 26.34846033 | 11.36909687 | 19.5993435  |            | 28.90878342 |
| hsa-miR-4668-5p   | 3.543845864  |            | 0.51085051 | 0           | 0.202011812 | 0.606035435 |             | 0           |            | 0           |
| hsa-miR-4747-5p   | 11.05059118  |            | 0.18081904 | 0           | 0.755336428 | 1.212070869 |             | 0           |            | 0           |
| hsa-miR-5196-5p   |              |            |            | 0           |             | 0           |             | 0           |            | 0           |
| hsa-miR-3649      |              |            |            | 0           |             | 0           |             | 0           |            | 0           |
| hsa-miR-92b-5p    | 1.110124182  | 0.83107589 | 0.66198177 | 14.54485043 | 19.00310821 | 27.40239874 | 7.974836806 | 17.15473644 |            | 24.36861868 |
| hsa-miR-3199      | 6.045864117  |            | 0.32988072 | 0           | 0.351312804 | 1.053938413 |             | 0           |            | 0           |
| hsa-miR-365b-5p   | 2.201682567  | 0.36825655 | 0.16734801 | 1.212070869 | 2.501285847 | 4.183909846 |             | 1.147003791 |            | 2.924234241 |
| hsa-miR-365a-5p   | 1.432758278  | 0.67661118 | 0.47438233 | 1.212070869 | 3.173026016 | 5.796661272 | 0.996854601 | 2.320980704 |            | 3.898978988 |
| hsa-miR-6878-5p   |              |            |            | 0           |             | 0           |             | 0           |            | 0           |
| hsa-miR-149-3p    |              |            |            | 0           |             | 0           |             | 0           |            | 0           |
| hsa-miR-6883-5p   |              |            |            | 0           |             | 0           |             | 0           |            | 0           |
| hsa-miR-638       |              |            |            | 0           |             | 0           |             | 0           |            | 0           |
| hsa-miR-3945      |              |            |            | 0           |             | 0           |             | 0           |            | 0           |
| hsa-miR-4253      |              |            |            | 0           |             | 0           |             | 0           |            | 0           |
| hsa-miR-4726-5p   | 4.020003532  |            | 0.14412191 | 0           | 1.363751176 | 2.510345907 |             | 0.332284867 |            | 0.996854601 |
| hsa-miR-296-5p    | 4.64775041   |            | 0.10334357 | 0.526969207 | 1.541558295 | 2.424141739 |             | 0.172259043 |            | 0.51677713  |
| hsa-miR-6877-5p   | -6.710501692 |            | 0.25817211 | 0           |             | 0           |             | 0.344518087 |            | 1.033554261 |
| hsa-miR-5001-5p   |              |            |            | 0           |             | 0           |             | 0           |            | 0           |
| hsa-miR-27a-5p    | -1.183325826 | 0.56627984 | 0.35612741 | 46.66472847 | 80.70611153 | 103.7609642 | 89.71691407 | 94.89944879 |            | 103.3554261 |
| hsa-miR-3144-5p   | -2.166383722 |            | 0.31254696 | 0           | 0.579680025 | 1.212070869 |             | 1.63194453  |            | 3.898978988 |
| hsa-miR-4652-5p   |              |            |            | 0           |             | 0           |             | 0           |            | 0           |
| hsa-miR-185-3p    | 2.15647491   | 0.09899549 | 0.02370111 | 5.020691815 | 6.934563521 | 7.904538098 | 2.924234241 | 3.337438476 |            | 3.987418403 |
| hsa-miR-625-5p    | 1.215150649  | 0.43679937 | 0.22700814 | 54.39082799 | 64.50440006 | 72.72425216 | 43.86160243 | 52.60595625 |            | 58.39581574 |
| hsa-miR-5010-5p   |              |            |            | 0           |             | 0           |             | 0           |            | 0           |
| hsa-miR-4697-5p   |              |            |            | 0           |             | 0           |             | 0           |            | 0           |
| hsa-miR-4488      |              |            |            | 0           |             | 0           |             | 0           |            | 0           |
| hsa-miR-6885-5p   |              |            |            | 0           |             | 0           |             | 0           |            | 0           |
| hsa-miR-6835-5p   |              |            |            | 0           |             | 0           |             | 0           |            | 0           |
| hsa-miR-342-5p    | -1.114762977 | 0.83195049 | 0.66556039 | 11.59332254 | 14.18562055 | 17.57502761 | 9.968546008 | 14.76201923 |            | 20.67108522 |
| hsa-miR-608       |              |            |            | 0           |             | 0           |             | 0           |            | 0           |
| hsa-miR-6747-5p   |              |            |            | 0           |             | 0           |             | 0           |            | 0           |
| hsa-miR-555       |              |            |            | 0           |             | 0           |             | 0           |            | 0           |
| hsa-miR-6756-5p   |              |            |            | 0           |             | 0           |             | 0           |            | 0           |
| hsa-miR-4455      | 2.861474213  | 0.24706924 | 0.09341742 | 0.836781969 | 2.114557573 | 3.688784446 |             | 0.676802954 |            | 1.033554261 |
| hsa-miR-609       |              |            |            | 0           |             | 0           |             | 0           |            | 0           |
| hsa-miR-4650-3p   |              |            |            | 0           |             | 0           |             | 0           |            | 0           |
| hsa-miR-3529-5p   | -3.836695655 |            | 0.44908316 | 0           |             | 0           |             | 0.324914916 |            | 0.974744747 |
| hsa-miR-5681b     |              |            |            | 0           |             | 0           |             | 0           |            | 0           |





|                  |              |            |            |              |             |             |             |             |             |
|------------------|--------------|------------|------------|--------------|-------------|-------------|-------------|-------------|-------------|
| hsa-miR-1264     |              |            |            | 0            | 0           | 0           | 0           | 0           | 0           |
| hsa-miR-34b-3p   | -2.066326359 | 0.38236999 |            | 0            | 0.480939135 | 0.836781969 |             | 0.689036174 | 2.067108522 |
| hsa-miR-34a-3p   | 1.631779609  | 0.56759447 | 0.3596146  | 0.836781969  | 1.99162199  | 3.030177174 | 0.996854601 | 1.326632785 | 1.949489494 |
| hsa-miR-5197-5p  |              |            |            | 0            | 0           | 0           | 0           | 0           | 0           |
| hsa-miR-8066     |              |            |            | 0            | 0           | 0           | 0           | 0           | 0           |
| hsa-miR-33a-3p   | -1.437280361 | 0.53203037 | 0.30679124 | 1.818106304  | 4.345976157 | 7.531037722 | 3.987418403 | 5.823308272 | 7.797957977 |
| hsa-miR-5571-5p  |              |            |            | 0            | 0           | 0           | 0           | 0           | 0           |
| hsa-miR-32-3p    | -1.427166374 | 0.21645565 | 0.07615447 | 14.75513778  | 20.93391307 | 25.45348826 | 20.46963969 | 29.60108852 | 38.87732943 |
| hsa-miR-624-3p   | -1.439200165 | 0.70047356 | 0.4990235  | 1.053938413  | 2.073057531 | 3.347127876 |             | 2.505472967 | 3.898978988 |
| hsa-miR-4731-3p  |              |            |            | 0            | 0           | 0           | 0           | 0           | 0           |
| hsa-miR-8485     |              |            |            | 0            | 0           | 0           | 0           | 0           | 0           |
| hsa-miR-603      |              |            |            | 0            | 0           | 0           | 0           | 0           | 0           |
| hsa-miR-6768-5p  | 3.543660986  | 0.51087004 |            | 0            | 0.175656402 | 0.526969207 | 0           | 0           | 0           |
| hsa-miR-4789-3p  |              |            |            | 0            | 0           | 0           | 0           | 0           | 0           |
| hsa-miR-3120-3p  | 83.61066753  | 0.0593457  | 0.01134932 | 4.848283478  | 6.833671914 | 8.958476511 | 0           | 0           | 0           |
| hsa-miR-4700-3p  |              |            |            | 0            | 0           | 0           | 0           | 0           | 0           |
| hsa-miR-4438     |              |            |            | 0            | 0           | 0           | 0           | 0           | 0           |
| hsa-miR-5580-3p  |              |            |            | 0            | 0           | 0           | 0           | 0           | 0           |
| hsa-miR-942-3p   | -1.971994552 | 0.5242206  |            | 0            | 0.202011812 | 0.606035435 | 0           | 0.497173959 | 0.974744747 |
| hsa-miR-323a-3p  | -8.09241619  | 0.01630337 | 0.002475   | 0            | 0.377668214 | 0.606035435 | 3.100662783 | 4.312183223 | 5.848468483 |
| hsa-miR-1911-3p  |              |            |            | 0            | 0           | 0           | 0           | 0           | 0           |
| hsa-miR-6753-5p  |              |            |            | 0            | 0           | 0           | 0           | 0           | 0           |
| hsa-miR-7153-3p  |              |            |            | 0            | 0           | 0           | 0           | 0           | 0           |
| hsa-miR-1295b-5p |              |            |            | 0            | 0           | 0           | 0           | 0           | 0           |
| hsa-miR-4640-3p  | -15.34117865 | 0.08996754 |            | 0            | 0           | 0           | 0.974744747 | 1.334002737 | 1.993709202 |
| hsa-miR-941      | -1.146518676 | 0.55616661 | 0.33613573 | 99.38981129  | 101.3396835 | 102.9241822 | 95.69804167 | 113.2648618 | 127.1271741 |
| hsa-miR-99b-5p   | 1.045640097  | 0.83425622 | 0.67500645 | 3085.21512   | 3198.984896 | 3287.742233 | 2895.862615 | 3062.641612 | 3292.687756 |
| hsa-miR-6510-3p  |              |            |            | 0            | 0           | 0           | 0           | 0           | 0           |
| hsa-miR-4655-5p  |              |            |            | 0            | 0           | 0           | 0           | 0           | 0           |
| hsa-miR-6800-3p  | -1.127020076 | 0.92111946 |            | 0            | 0.175656402 | 0.526969207 | 0           | 0.172259043 | 0.51677713  |
| hsa-miR-3200-3p  | -1.026376382 | 0.93212443 | 0.84612561 | 93.27354956  | 115.881882  | 129.691583  | 113.0703907 | 117.2572936 | 125.0600656 |
| hsa-miR-6782-3p  | 8.486417713  | 0.23996954 |            | 0            | 0.606035435 | 1.818106304 | 0           | 0           | 0           |
| hsa-miR-574-3p   | 3.094281333  | 5.992E-21  | 1.312E-22  | 357.285122   | 380.5755739 | 401.1954578 | 115.7580772 | 124.3395424 | 128.6663066 |
| hsa-miR-4445-3p  |              |            |            | 0            | 0           | 0           | 0           | 0           | 0           |
| hsa-miR-28-3p    | 1.178723552  | 0.38150312 | 0.17795955 | 743.0623886  | 843.7524919 | 902.1712816 | 661.9114549 | 717.5036817 | 775.8968187 |
| hsa-miR-512-5p   |              |            |            | 0            | 0           | 0           | 0           | 0           | 0           |
| hsa-miR-4418     |              |            |            | 0            | 0           | 0           | 0           | 0           | 0           |
| hsa-miR-6807-3p  | 16.05749237  | 0.11790755 |            | 0.606035435  | 1.286835664 | 1.673563938 | 0           | 0           | 0           |
| hsa-miR-892b     |              |            |            | 0            | 0           | 0           | 0           | 0           | 0           |
| hsa-miR-1183     |              |            |            | 0            | 0           | 0           | 0           | 0           | 0           |
| hsa-miR-4318     |              |            |            | 0            | 0           | 0           | 0           | 0           | 0           |
| hsa-miR-892a     | 6.046759143  | 0.32983659 |            | 0            | 0.454583725 | 0.836781969 | 0           | 0           | 0           |
| hsa-miR-4676-3p  | -2.066326359 | 0.38249232 |            | 0            | 0.480939135 | 0.836781969 | 0           | 0.689036174 | 2.067108522 |
| hsa-miR-892c-3p  |              |            |            | 0            | 0           | 0           | 0           | 0           | 0           |
| hsa-miR-374c-3p  |              |            |            | 0            | 0           | 0           | 0           | 0           | 0           |
| hsa-miR-4773     |              |            |            | 0            | 0           | 0           | 0           | 0           | 0           |
| hsa-miR-3154     | -3.835816219 | 0.44917283 |            | 0            | 0           | 0           | 0           | 0.172259043 | 0.51677713  |
| hsa-miR-3123     |              |            |            | 0            | 0           | 0           | 0           | 0           | 0           |
| hsa-miR-6873-5p  |              |            |            | 0            | 0           | 0           | 0           | 0           | 0           |
| hsa-miR-5586-3p  |              |            |            | 0            | 0           | 0           | 0           | 0           | 0           |
| hsa-miR-5694     |              |            |            | 0            | 0           | 0           | 0           | 0           | 0           |
| hsa-miR-6871-3p  | -3.836717681 | 0.44908091 |            | 0            | 0           | 0           | 0           | 0.332284867 | 0.996854601 |
| hsa-miR-424-5p   | 1.300588253  | 0.20878245 | 0.07177184 | 288.7791252  | 391.0350359 | 527.8568636 | 243.6861868 | 299.9696545 | 359.1601057 |
| hsa-miR-497-5p   | -1.343368383 | 0.1319728  | 0.03525697 | 98.01627242  | 129.4380872 | 147.2736266 | 133.5400304 | 172.5646611 | 192.7578697 |
| hsa-miR-6165     |              |            |            | 0            | 0           | 0           | 0           | 0           | 0           |
| hsa-miR-6510-5p  |              |            |            | 0            | 0           | 0           | 0           | 0           | 0           |
| hsa-miR-4274     |              |            |            | 0            | 0           | 0           | 0           | 0           | 0           |
| hsa-miR-4519     |              |            |            | 0            | 0           | 0           | 0           | 0           | 0           |
| hsa-miR-449b-3p  | 3.543845864  | 0.51085051 |            | 0            | 0.202011812 | 0.606035435 | 0           | 0           | 0           |
| hsa-miR-6858-3p  |              |            |            | 0            | 0           | 0           | 0           | 0           | 0           |
| hsa-miR-4323     |              |            |            | 0            | 0           | 0           | 0           | 0           | 0           |
| hsa-miR-3940-3p  | 3.745533578  | 0.0938745  | 0.02165281 | 2.510345907  | 3.858127679 | 4.848283478 | 0           | 0.689036174 | 2.067108522 |
| hsa-miR-4687-5p  |              |            |            | 0            | 0           | 0           | 0           | 0           | 0           |
| hsa-miR-6746-3p  |              |            |            | 0            | 0           | 0           | 0           | 0           | 0           |
| hsa-miR-6877-3p  |              |            |            | 0            | 0           | 0           | 0           | 0           | 0           |
| hsa-miR-4293     |              |            |            | 0            | 0           | 0           | 0           | 0           | 0           |
| hsa-miR-7846-3p  |              |            |            | 0            | 0           | 0           | 0           | 0           | 0           |
| hsa-miR-6876-5p  |              |            |            | 0            | 0           | 0           | 0           | 0           | 0           |
| hsa-miR-4476     |              |            |            | 0            | 0           | 0           | 0           | 0           | 0           |
| hsa-miR-8083     |              |            |            | 0            | 0           | 0           | 0           | 0           | 0           |
| hsa-miR-4695-5p  |              |            |            | 0            | 0           | 0           | 0           | 0           | 0           |
| hsa-miR-4433b-3p |              |            |            | 0            | 0           | 0           | 0           | 0           | 0           |
| hsa-miR-4661-3p  |              |            |            | 0            | 0           | 0           | 0           | 0           | 0           |
| hsa-miR-10524-5p |              |            |            | 0            | 0           | 0           | 0           | 0           | 0           |
| hsa-miR-1265     |              |            |            | 0            | 0           | 0           | 0           | 0           | 0           |
| hsa-miR-3622a-5p |              |            |            | 0            | 0           | 0           | 0           | 0           | 0           |
| hsa-miR-6511a-5p | -1.127020076 | 0.92111946 |            | 0            | 0.175656402 | 0.526969207 | 0           | 0.172259043 | 0.51677713  |
| hsa-miR-6808-5p  |              |            |            | 0            | 0           | 0           | 0           | 0           | 0           |
| hsa-miR-6893-5p  | 3.544185779  | 0.5108146  |            | 0            | 0.278927323 | 0.836781969 | 0           | 0           | 0           |
| hsa-miR-2682-5p  | 4.619032976  | 6.254E-10  | 3.613E-11  | 33.72602922  | 35.43350884 | 36.81840664 | 3.898978988 | 6.898575557 | 9.818765478 |
| hsa-miR-15a-3p   | 1.646988174  | 0.49258886 | 0.27254187 | 3.030177174  | 3.458634086 | 4.183909846 | 0.974744747 | 1.850779867 | 2.583885652 |
| hsa-miR-3186-5p  |              |            |            | 0            | 0           | 0           | 0           | 0           | 0           |
| hsa-miR-5584-5p  |              |            |            | 0            | 0           | 0           | 0           | 0           | 0           |
| hsa-miR-6750-5p  | -3.836717681 | 0.44908091 |            | 0            | 0           | 0           | 0           | 0.332284867 | 0.996854601 |
| hsa-miR-6822-5p  |              |            |            | 0            | 0           | 0           | 0           | 0           | 0           |
| hsa-miR-6760-5p  |              |            |            | 0            | 0           | 0           | 0           | 0           | 0           |
| hsa-miR-4756-5p  |              |            |            | 0            | 0           | 0           | 0           | 0           | 0           |
| hsa-miR-1321     |              |            |            | 0            | 0           | 0           | 0           | 0           | 0           |
| hsa-miR-6735-5p  |              |            |            | 0            | 0           | 0           | 0           | 0           | 0           |
| hsa-miR-4436b-3p |              |            |            | 0            | 0           | 0           | 0           | 0           | 0           |
| hsa-miR-6879-5p  |              |            |            | 0            | 0           | 0           | 0           | 0           | 0           |
| hsa-miR-6895-5p  | 3.543660986  | 0.51087004 |            | 0            | 0.175656402 | 0.526969207 | 0           | 0           | 0           |
| hsa-miR-7160-3p  |              |            |            | 0            | 0           | 0           | 0           | 0           | 0           |
| hsa-miR-4512     | -3.835816219 | 0.44917283 |            | 0            | 0           | 0           | 0           | 0.172259043 | 0.51677713  |
| hsa-miR-5088-5p  | -9.58450593  | 0.1798856  |            | 0            | 0           | 0           | 0           | 0.51677713  | 1.550331391 |
| hsa-miR-4446-3p  |              |            |            | 0            | 0           | 0           | 0           | 0           | 0           |
| hsa-miR-6813-5p  |              |            |            | 0            | 0           | 0           | 0           | 0           | 0           |
| hsa-miR-6794-5p  |              |            |            | 0            | 0           | 0           | 0           | 0           | 0           |
| hsa-miR-1178-5p  |              |            |            | 0            | 0           | 0           | 0           | 0           | 0           |
| hsa-miR-3927-3p  |              |            |            | 0            | 0           | 0           | 0           | 0           | 0           |
| hsa-miR-370-5p   | -3.835816219 | 0.44917283 |            | 0            | 0           | 0           | 0           | 0.172259043 | 0.51677713  |
| hsa-miR-431-3p   |              |            |            | 0            | 0           | 0           | 0           | 0           | 0           |
| hsa-miR-12114    |              |            |            | 0            | 0           | 0           | 0           | 0           | 0           |
| hsa-miR-802      |              |            |            | 0            | 0           | 0           | 0           | 0           | 0           |
| hsa-miR-8079     |              |            |            | 0            | 0           | 0           | 0           | 0           | 0           |
| hsa-miR-8062     |              |            |            | 0            | 0           | 0           | 0           | 0           | 0           |
| hsa-miR-3666     |              |            |            | 0            | 0           | 0           | 0           | 0           | 0           |
| hsa-miR-301a-3p  | -1.41190726  | 0.0764259  | 0.01626552 | 507.99883151 | 697.8175214 | 859.9642818 | 764.1998817 | 984.2759574 | 1137.943241 |
| hsa-miR-301b-3p  | -1.25008354  | 0.40645558 | 0.20530457 | 36.360087525 | 43.40078157 | 50.20691815 | 42.86474783 | 51.68265107 | 61.49647852 |
| hsa-miR-130b-3p  | 1.009079295  | 0.96770494 | 0.94257952 | 507.9266552  | 557.8506888 | 646.0337734 | 544.1663183 | 554.0210495 | 565.2165586 |
| hsa-miR-130a-3p  | -1.395259378 | 0.03331209 | 0.00603    | 1605.675172  | 1928.876008 | 2436.262448 | 2480.725381 | 2691.120375 | 2829.354789 |
| hsa-miR-4295     |              |            |            | 0            | 0           | 0           | 0           | 0           | 0           |
| hsa-miR-33b-3p   | -2.082620051 | 0.17240127 | 0.05335865 | 3.161815239  | 3.660645898 | 4.183909846 | 2.990563802 | 6.908302095 | 11.885874   |













|                   |              |            |            |             |             |             |             |             |             |
|-------------------|--------------|------------|------------|-------------|-------------|-------------|-------------|-------------|-------------|
| hsa-miR-345-5p    | -1.949181365 | 0.000279   | 0.00003054 | 34.30806073 | 37.16133813 | 38.99572128 | 61.80498525 | 73.61575216 | 87.72702724 |
| hsa-miR-4502      | -1.971645644 |            | 0.52726264 | 0           | 0.175656402 | 0.526969207 | 0           | 0.344518087 | 1.033554261 |
| hsa-miR-3130-3p   |              |            |            | 0           | 0           | 0           | 0           | 0           | 0           |
| hsa-miR-191-3p    | -1.444789016 | 0.02888232 | 0.005018   | 85.89598067 | 102.8513201 | 112.9655658 | 124.7673276 | 146.0002624 | 174.6706701 |
| hsa-miR-4734      |              |            |            | 0           | 0           | 0           | 0           | 0           | 0           |
| hsa-miR-204-3p    |              |            |            | 0           | 0           | 0           | 0           | 0           | 0           |
| hsa-miR-619-5p    | 4.020837465  | 0.14417001 |            | 1.053938413 | 1.313191074 | 1.673563938 |             | 0.172259043 | 0.51677713  |
| hsa-miR-612       |              |            |            | 0           | 0           | 0           | 0           | 0           | 0           |
| hsa-miR-4486      |              |            |            | 0           | 0           | 0           | 0           | 0           | 0           |
| hsa-miR-3663-5p   |              |            |            | 0           | 0           | 0           | 0           | 0           | 0           |
| hsa-miR-4299      |              |            |            | 0           | 0           | 0           | 0           | 0           | 0           |
| hsa-miR-548q      | 1.597998933  | 0.39706008 | 0.19679277 | 5.269692065 | 6.565955368 | 8.367819691 | 0.996854601 | 3.221482264 | 6.718102696 |
| hsa-miR-29b-1-5p  | 2.863565546  | 5.909E-08  | 3.968E-09  | 94.32748797 | 112.9242477 | 131.5096893 | 28.26759767 | 38.22947437 | 47.543496   |
| hsa-miR-3182      | 1.336278077  | 0.64513834 | 0.4351152  | 5.454318912 | 9.40125867  | 15.89885741 | 0.974744747 | 6.600633764 | 10.85231974 |
| hsa-miR-3655      |              |            |            | 0           | 0           | 0           | 0           | 0           | 0           |
| hsa-miR-1180-5p   | -3.835816219 | 0.44917283 |            | 0           | 0           | 0           |             | 0.172259043 | 0.51677713  |
| hsa-miR-539-5p    |              |            |            | 0           | 0           | 0           | 0           | 0           | 0           |
| hsa-miR-873-3p    | -5.171722197 | 1.223E-11  | 6.429E-13  | 7.531037722 | 9.940764599 | 13.33277956 | 35.88676563 | 51.53721505 | 65.11391844 |
| hsa-miR-3928-3p   | 3.01349929   | 0.31869443 | 0.13673391 | 0.836781969 | 1.587588366 | 2.107876826 |             | 0.497173959 | 0.974744747 |
| hsa-miR-6089      |              |            |            | 0           | 0           | 0           | 0           | 0           | 0           |
| hsa-miR-3197      |              |            |            | 0           | 0           | 0           | 0           | 0           | 0           |
| hsa-miR-1914-3p   |              |            |            | 0           | 0           | 0           | 0           | 0           | 0           |
| hsa-miR-6086      |              |            |            | 0           | 0           | 0           | 0           | 0           | 0           |
| hsa-miR-4481      |              |            |            | 0           | 0           | 0           | 0           | 0           | 0           |
| hsa-miR-144-5p    | -4.505143786 | 0.11179036 |            | 0           | 0.202011812 | 0.606035435 | 0           | 1.021321041 | 2.067108522 |
| hsa-miR-4454      | -1.27917348  | 0.3561974  | 0.15866172 | 35.75609065 | 51.86029382 | 70.2896854  | 62.01325565 | 65.6634755  | 70.18162179 |
| hsa-miR-4534      |              |            |            | 0           | 0           | 0           | 0           | 0           | 0           |
| hsa-miR-8069      |              |            |            | 0           | 0           | 0           | 0           | 0           | 0           |
| hsa-miR-145-3p    | -1.042436207 | 0.96612968 | 0.93471504 | 1.58090762  | 1.690859287 | 1.818106304 |             | 1.663780921 | 2.924234241 |
| hsa-miR-4722-5p   |              |            |            | 0           | 0           | 0           | 0           | 0           | 0           |
| hsa-miR-657       | 3.543660986  | 0.51087004 |            | 0           | 0.175656402 | 0.526969207 | 0           | 0           | 0           |
| hsa-miR-4252      |              |            |            | 0           | 0           | 0           | 0           | 0           | 0           |
| hsa-miR-3194-5p   | -1.972268678 | 0.53263922 |            | 0           | 0.278927323 | 0.836781969 | 0           | 0.657199783 | 0.996854601 |
| hsa-miR-10396b-3p | -3.835816219 | 0.44917283 |            | 0           | 0           | 0           | 0           | 0.172259043 | 0.51677713  |
| hsa-miR-10396a-3p |              |            |            | 0           | 0           | 0           | 0           | 0           | 0           |
| hsa-miR-4312      |              |            |            | 0           | 0           | 0           | 0           | 0           | 0           |
| hsa-miR-1273c     | 1.608680705  | 0.68321525 | 0.48373635 | 0.526969207 | 1.416461994 | 2.510345907 |             | 0.822088875 | 1.949489494 |
| hsa-miR-4783-5p   |              |            |            | 0           | 0           | 0           | 0           | 0           | 0           |
| hsa-miR-658       |              |            |            | 0           | 0           | 0           | 0           | 0           | 0           |
| hsa-miR-3960      |              |            |            | 0           | 0           | 0           | 0           | 0           | 0           |
| hsa-miR-8072      |              |            |            | 0           | 0           | 0           | 0           | 0           | 0           |
| hsa-miR-10396a-5p |              |            |            | 0           | 0           | 0           | 0           | 0           | 0           |
| hsa-miR-187-5p    |              |            |            | 0           | 0           | 0           | 0           | 0           | 0           |
| hsa-miR-621       |              |            |            | 0           | 0           | 0           | 0           | 0           | 0           |
| hsa-miR-7158-5p   |              |            |            | 0           | 0           | 0           | 0           | 0           | 0           |
| hsa-miR-6847-3p   | -1.445554337 | 0.76832627 | 0.5678202  | 0.526969207 | 0.858607348 | 1.212070869 | 0.51677713  | 1.486658609 | 1.993709202 |
| hsa-miR-4268      |              |            |            | 0           | 0           | 0           | 0           | 0           | 0           |
| hsa-miR-4448      |              |            |            | 0           | 0           | 0           | 0           | 0           | 0           |
| hsa-miR-8077      |              |            |            | 0           | 0           | 0           | 0           | 0           | 0           |
| hsa-miR-3135b     |              |            |            | 0           | 0           | 0           | 0           | 0           | 0           |
| hsa-miR-5589-5p   |              |            |            | 0           | 0           | 0           | 0           | 0           | 0           |
| hsa-miR-6131      |              |            |            | 0           | 0           | 0           | 0           | 0           | 0           |
| hsa-miR-103a-1-5p |              |            |            | 0           | 0           | 0           | 0           | 0           | 0           |
| hsa-miR-4327      |              |            |            | 0           | 0           | 0           | 0           | 0           | 0           |
| hsa-miR-3160-5p   |              |            |            | 0           | 0           | 0           | 0           | 0           | 0           |
| hsa-miR-6124      |              |            |            | 0           | 0           | 0           | 0           | 0           | 0           |
| hsa-miR-6077      |              |            |            | 0           | 0           | 0           | 0           | 0           | 0           |
| hsa-miR-3619-3p   |              |            |            | 0           | 0           | 0           | 0           | 0           | 0           |
| hsa-miR-711       |              |            |            | 0           | 0           | 0           | 0           | 0           | 0           |
| hsa-miR-6503-3p   |              |            |            | 0           | 0           | 0           | 0           | 0           | 0           |
| hsa-miR-4516      | 6.046179412  | 0.32986518 |            | 0           | 0.377668214 | 0.606035435 | 0           | 0           | 0           |
| hsa-miR-505-5p    | 1.367601974  | 0.38637578 | 0.18254699 | 10.8781656  | 19.48812018 | 25.45348826 | 10.85231974 | 15.10738118 | 18.52015019 |
| hsa-miR-3689d     |              |            |            | 0           | 0           | 0           | 0           | 0           | 0           |
| hsa-miR-4294      |              |            |            | 0           | 0           | 0           | 0           | 0           | 0           |
| hsa-miR-504-3p    |              |            |            | 0           | 0           | 0           | 0           | 0           | 0           |
| hsa-miR-3201      | 3.544185779  | 0.5108146  |            | 0           | 0.278927323 | 0.836781969 | 0           | 0           | 0           |
| hsa-miR-1193      |              |            |            | 0           | 0           | 0           | 0           | 0           | 0           |
| hsa-miR-4320      |              |            |            | 0           | 0           | 0           | 0           | 0           | 0           |
| hsa-miR-6744-3p   |              |            |            | 0           | 0           | 0           | 0           | 0           | 0           |
| hsa-miR-6069      |              |            |            | 0           | 0           | 0           | 0           | 0           | 0           |
| hsa-miR-4284      | 11.05328531  | 0.18077106 |            | 0.526969207 | 0.93552286  | 1.673563938 |             | 0.172259043 | 0.51677713  |
| hsa-miR-5787      |              |            |            | 0           | 0           | 0           | 0           | 0           | 0           |
| hsa-miR-3153      |              |            |            | 0           | 0           | 0           | 0           | 0           | 0           |
| hsa-miR-8059      |              |            |            | 0           | 0           | 0           | 0           | 0           | 0           |
| hsa-miR-6090      |              |            |            | 0           | 0           | 0           | 0           | 0           | 0           |
| hsa-miR-920       |              |            |            | 0           | 0           | 0           | 0           | 0           | 0           |
| hsa-miR-6799-5p   | -3.835816219 | 0.44917283 |            | 0           | 0           | 0           |             | 0.172259043 | 0.51677713  |
| hsa-miR-2861      |              |            |            | 0           | 0           | 0           | 0           | 0           | 0           |
| hsa-miR-3178      |              |            |            | 0           | 0           | 0           | 0           | 0           | 0           |
| hsa-miR-4492      |              |            |            | 0           | 0           | 0           | 0           | 0           | 0           |
| hsa-miR-762       |              |            |            | 0           | 0           | 0           | 0           | 0           | 0           |
| hsa-miR-4675      |              |            |            | 0           | 0           | 0           | 0           | 0           | 0           |
| hsa-miR-4271      |              |            |            | 0           | 0           | 0           | 0           | 0           | 0           |
| hsa-miR-128-2-5p  |              |            |            | 0           | 0           | 0           | 0           | 0           | 0           |
| hsa-miR-4525      |              |            |            | 0           | 0           | 0           | 0           | 0           | 0           |
| hsa-miR-328-5p    |              |            |            | 0           | 0           | 0           | 0           | 0           | 0           |
| hsa-miR-6752-5p   |              |            |            | 0           | 0           | 0           | 0           | 0           | 0           |
| hsa-miR-615-5p    | 3.543660986  | 0.51087004 |            | 0           | 0.175656402 | 0.526969207 | 0           | 0           | 0           |
| hsa-miR-503-3p    | 1.019508595  | 0.96612968 | 0.93381631 | 8.484496086 | 10.59758873 | 11.71494757 | 9.968546008 | 10.34209361 | 10.72219222 |
| hsa-miR-4483      | 6.047074529  | 0.32982105 |            | 0           | 0.480939135 | 0.836781969 | 0           | 0           | 0           |
| hsa-miR-23a-5p    | 1.581931679  | 0.57156453 |            | 0           | 0.90916745  | 1.673563938 |             | 0.344518087 | 1.033554261 |
| hsa-miR-4281      |              |            |            | 0           | 0           | 0           | 0           | 0           | 0           |
| hsa-miR-4710      |              |            |            | 0           | 0           | 0           | 0           | 0           | 0           |
| hsa-miR-4466      |              |            |            | 0           | 0           | 0           | 0           | 0           | 0           |
| hsa-miR-92a-2-5p  | -3.836695655 | 0.44908316 |            | 0           | 0           | 0           |             | 0.324914916 | 0.974744747 |
| hsa-miR-5087      | 3.543845864  | 0.51085051 |            | 0           | 0.202011812 | 0.606035435 | 0           | 0           | 0           |
| hsa-miR-376a-2-5p | -3.836717681 | 0.44908091 |            | 0           | 0           | 0           | 0           | 0.332284867 | 0.996854601 |
| hsa-miR-6073      |              |            |            | 0           | 0           | 0           | 0           | 0           | 0           |
| hsa-miR-3713      |              |            |            | 0           | 0           | 0           | 0           | 0           | 0           |
| hsa-miR-198       |              |            |            | 0           | 0           | 0           | 0           | 0           | 0           |
| hsa-miR-489-5p    |              |            |            | 0           | 0           | 0           | 0           | 0           | 0           |
| hsa-miR-8078      |              |            |            | 0           | 0           | 0           | 0           | 0           | 0           |
| hsa-miR-4316      |              |            |            | 0           | 0           | 0           | 0           | 0           | 0           |
| hsa-miR-143-5p    | 2.444797175  | 0.26424265 |            | 0           | 1.519732915 | 3.347127876 |             | 0.497173959 | 0.974744747 |
| hsa-miR-376c-5p   |              |            |            | 0           | 0           | 0           | 0           | 0           | 0           |
| hsa-miR-663b      |              |            |            | 0           | 0           | 0           | 0           | 0           | 0           |
| hsa-miR-4769-5p   |              |            |            | 0           | 0           | 0           | 0           | 0           | 0           |
| hsa-miR-3151-5p   |              |            |            | 0           | 0           | 0           | 0           | 0           | 0           |
| hsa-miR-4447      |              |            |            | 0           | 0           | 0           | 0           | 0           | 0           |
| hsa-miR-4472      |              |            |            | 0           | 0           | 0           | 0           | 0           | 0           |
| hsa-miR-642b-5p   | -1.127020076 | 0.92111946 |            | 0           | 0.175656402 | 0.526969207 | 0           | 0.172259043 | 0.51677713  |
| hsa-miR-2116-5p   | -1.895337792 | 0.39013864 | 0.18581321 | 1.212070869 | 1.664503878 | 2.107876826 | 1.993709202 | 3.170042701 | 3.898978988 |
| hsa-miR-3147      |              |            |            | 0           | 0           | 0           | 0           | 0           | 0           |





















|                   |              |            |             |             |             |             |             |             |
|-------------------|--------------|------------|-------------|-------------|-------------|-------------|-------------|-------------|
| hsa-miR-4755-5p   | -1.263813377 | 0.81492219 | 0           | 0.351312804 | 1.053938413 | 0           | 0.649829831 | 1.949489494 |
| hsa-miR-5006-3p   | 3.544185779  | 0.5108146  | 0           | 0.278927323 | 0.836781969 | 0           | 0           | 0           |
| hsa-miR-1180-3p   | 1.107557976  | 0.77631463 | 59.99750804 | 87.40397754 | 114.3523178 | 58.91259287 | 79.64970687 | 105.2724327 |
| hsa-miR-3685      |              |            | 0           | 0           | 0           | 0           | 0           | 0           |
| hsa-miR-670-3p    | -21.08336624 | 0.05846224 | 0           | 0           | 0           | 0           | 1.511125049 | 2.583885652 |
| hsa-miR-3059-5p   | -2.582244399 | 0.12328077 | 0.836781969 | 1.763244769 | 2.634846033 | 2.990563802 | 4.535881829 | 6.718102696 |
| hsa-miR-7152-5p   |              |            | 0           | 0           | 0           | 0           | 0           | 0           |
| hsa-miR-7159-3p   |              |            | 0           | 0           | 0           | 0           | 0           | 0           |
| hsa-miR-4482-3p   | -4.322415645 | 0.07909756 | 0.01698485  | 0.526969207 | 1.58090762  | 2.067108522 | 3.325205256 | 4.984273004 |
| hsa-miR-6833-3p   | 1.22312497   | 0.82413785 | 0           | 0.526969207 | 1.58090762  | 0           | 0.50454391  | 0.996854601 |
| hsa-miR-4743-3p   |              |            | 0           | 0           | 0           | 0           | 0           | 0           |
| hsa-miR-4659a-3p  | 2.520582841  | 0.24485471 | 0.606035435 | 5.202432789 | 9.20460166  | 0.51677713  | 2.143858391 | 2.990563802 |
| hsa-miR-4659b-3p  |              |            | 0           | 0           | 0           | 0           | 0           | 0           |
| hsa-miR-1304-5p   |              |            | 0           | 0           | 0           | 0           | 0           | 0           |
| hsa-miR-6516-5p   | 1.87153041   | 0.39076896 | 0.18939459  | 2.107876826 | 3.511344905 | 4.242248043 | 0.974744747 | 1.678520823 |
| hsa-miR-4520-2-3p |              |            | 0           | 0           | 0           | 0           | 0           | 0           |
| hsa-miR-12131     |              |            | 0           | 0           | 0           | 0           | 0           | 0           |
| hsa-miR-182-5p    | -1.086278134 | 0.67661118 | 0.47503544  | 6076.71066  | 6682.029109 | 6998.151063 | 6480.551759 | 7257.219668 |
| hsa-miR-96-5p     | -1.141318449 | 0.48161522 | 0.26576723  | 1510.293746 | 1603.745078 | 1678.58463  | 1604.429854 | 1828.210826 |
| hsa-miR-3913-5p   | -1.106845333 | 0.91504057 | 0.80951035  | 2.424141739 | 2.874424031 | 3.688784446 | 2.924234241 | 3.337438476 |
| hsa-miR-6513-5p   |              |            | 0           | 0           | 0           | 0           | 0           | 0           |
| hsa-miR-133b      | -1.167493477 | 0.8408778  | 0.526969207 | 0.656595537 | 0.836781969 | 0           | 0.669433003 | 1.033554261 |
| hsa-miR-133a-3p   | -1.94689325  | 0.00002126 | 1.831E-06   | 64.43221162 | 73.47267179 | 84.84496086 | 135.9123853 | 146.4539353 |
| hsa-miR-3149      | -2.641188145 | 0.21237513 | 0           | 0.377668214 | 0.606035435 | 0           | 1.166606962 | 1.949489494 |
| hsa-miR-758-3p    |              |            | 0           | 0           | 0           | 0           | 0           | 0           |
| hsa-miR-375-3p    | -1.561963221 | 0.09884543 | 0.02334406  | 19.39313391 | 30.34111733 | 38.99572128 | 40.8253933  | 48.07091829 |
| hsa-miR-7856-5p   |              |            | 0           | 0           | 0           | 0           | 0           | 0           |
| hsa-miR-1305      | -21.55383027 | 0.06336426 | 0           | 0           | 0           | 0           | 1.978969299 | 3.987418403 |
| hsa-miR-450b-5p   | -1.02440294  | 0.93212443 | 0.84263552  | 283.6245834 | 306.0223249 | 339.8951382 | 294.3729136 | 312.8797996 |
| hsa-miR-507       |              |            | 0           | 0           | 0           | 0           | 0           | 0           |
| hsa-miR-3680-3p   | 10.22210643  | 0.21458537 | 0           | 0.702625609 | 2.107876826 | 0           | 0           | 0           |
| hsa-miR-450a-5p   | -1.00879868  | 0.9772691  | 0.96607306  | 15.8090762  | 20.14078186 | 27.87763    | 15.59591595 | 20.39612206 |
| hsa-miR-5010-3p   | -1.360307279 | 0.56108715 | 0.34238603  | 3.030177174 | 4.440187018 | 5.269692065 | 4.650994174 | 6.483014737 |
| hsa-miR-335-3p    | -2.700116664 | 2.705E-13  | 1.303E-14   | 246.0503865 | 272.5027828 | 296.1566941 | 701.8162179 | 738.2587816 |
| hsa-miR-9983-3p   | -18.21087286 | 0.06992402 | 0           | 0           | 0           | 0.974744747 | 1.346235957 | 2.067108522 |
