# Supplementary material for: A Stem-like Patient-Derived Ovarian Cancer Model of Platinum Resistance Reveals Dissociation of Stemness and Resistance
Source: MDPI journal article supplement (doi:10.3390/ijms25073843), 2024-03-29
Supplement: s1 [file s1]

**Table S4.** Top hits for hallmark pathways in gene set enrichment analysis for PDX4 SE.

| NAME                                       | SIZE | ES         | NES        | NOM p-val  | FDR q-val  | FWER p-val | RANK AT MAX LEADING EDGE            |
|--------------------------------------------|------|------------|------------|------------|------------|------------|-------------------------------------|
| HALLMARK_UV_RESPONSE_DN                    | 116  | -0.5773815 | -1.9607254 | 0          | 0          | 0          | 1217 tags=26%, list=9%, signal=28%  |
| HALLMARK_EPITHELIAL_MESENCHYMAL_TRANSITION | 124  | -0.524127  | -1.7717289 | 0          | 0.00586276 | 0.017      | 863 tags=29%, list=7%, signal=31%   |
| HALLMARK_ESTROGEN_RESPONSE_EARLY           | 145  | -0.4339967 | -1.5064288 | 0.0074813  | 0.11621336 | 0.403      | 2172 tags=30%, list=16%, signal=35% |
| HALLMARK_KRAS_SIGNALING_DN                 | 78   | -0.4742461 | -1.4985373 | 0.01628223 | 0.09456088 | 0.429      | 1593 tags=29%, list=12%, signal=33% |
| HALLMARK_MYOGENESIS                        | 120  | -0.4346434 | -1.4716043 | 0.01159794 | 0.10072976 | 0.524      | 1570 tags=22%, list=12%, signal=24% |
| HALLMARK_IL2_STAT5_SIGNALING               | 139  | -0.4232688 | -1.4616113 | 0.01130653 | 0.09156377 | 0.553      | 1140 tags=22%, list=9%, signal=24%  |
| HALLMARK_IL6_JAK_STAT3_SIGNALING           | 47   | -0.4982558 | -1.4508231 | 0.03188406 | 0.08779717 | 0.59       | 1027 tags=28%, list=8%, signal=30%  |
| HALLMARK_ANGIOGENESIS                      | 22   | -0.5228466 | -1.3428416 | 0.13064516 | 0.20146058 | 0.915      | 659 tags=36%, list=5%, signal=38%   |
| HALLMARK_COAGULATION                       | 69   | -0.4271852 | -1.3334436 | 0.09190672 | 0.19305976 | 0.931      | 2204 tags=32%, list=17%, signal=38% |
| HALLMARK_APICAL_JUNCTION                   | 136  | -0.3593872 | -1.232883  | 0.1238825  | 0.35841218 | 0.997      | 1722 tags=20%, list=13%, signal=23% |
| HALLMARK_INFLAMMATORY_RESPONSE             | 92   | -0.364889  | -1.1947147 | 0.19015957 | 0.4154494  | 0.999      | 709 tags=17%, list=5%, signal=18%   |
| HALLMARK_NOTCH_SIGNALING                   | 28   | -0.4413919 | -1.1797172 | 0.26971608 | 0.41892126 | 1          | 648 tags=18%, list=5%, signal=19%   |
| HALLMARK_BILE_ACID_METABOLISM              | 69   | -0.3717468 | -1.1601362 | 0.23119777 | 0.43029636 | 1          | 2600 tags=35%, list=20%, signal=43% |
| HALLMARK_MITOTIC_SPINDLE                   | 191  | -0.3102576 | -1.0924199 | 0.2967819  | 0.57727784 | 1          | 3987 tags=35%, list=30%, signal=50% |
| HALLMARK_HEDGEHOG_SIGNALING                | 25   | -0.3956718 | -1.0315069 | 0.43037975 | 0.7076481  | 1          | 1537 tags=20%, list=12%, signal=23% |
| HALLMARK_WNT_BETA_CATENIN_SIGNALING        | 35   | -0.3647906 | -1.0186746 | 0.4427481  | 0.7006348  | 1          | 612 tags=11%, list=5%, signal=12%   |
| HALLMARK_UV_RESPONSE_UP                    | 128  | -0.2974617 | -1.0095041 | 0.45271122 | 0.6834069  | 1          | 1098 tags=13%, list=8%, signal=14%  |
| HALLMARK_HYPOXIA                           | 151  | -0.2891088 | -0.9959388 | 0.45742092 | 0.6795045  | 1          | 1299 tags=15%, list=10%, signal=17% |
| HALLMARK_XENOBIOTIC_METABOLISM             | 127  | -0.2888062 | -0.9849293 | 0.50128865 | 0.67036897 | 1          | 2367 tags=24%, list=18%, signal=29% |
| HALLMARK_ESTROGEN_RESPONSE_LATE            | 131  | -0.2817175 | -0.9679362 | 0.5070243  | 0.6787682  | 1          | 1038 tags=15%, list=8%, signal=16%  |
| HALLMARK_COMPLEMENT                        | 118  | -0.2863833 | -0.9591986 | 0.5474359  | 0.6657625  | 1          | 2329 tags=24%, list=18%, signal=29% |
| HALLMARK_HEME_METABOLISM                   | 154  | -0.266092  | -0.918512  | 0.6223067  | 0.7301204  | 1          | 2443 tags=22%, list=19%, signal=27% |
| HALLMARK_ADIPOGENESIS                      | 169  | -0.2031782 | -0.7101315 | 0.97146404 | 1          | 1          | 2362 tags=16%, list=18%, signal=19% |
| HALLMARK_G2M_CHECKPOINT                    | 197  | -0.1978788 | -0.7030231 | 0.98062956 | 1          | 1          | 3867 tags=26%, list=29%, signal=36% |
| HALLMARK_APICAL_SURFACE                    | 25   | -0.2733564 | -0.698557  | 0.8569132  | 0.98734784 | 1          | 1415 tags=24%, list=11%, signal=27% |
| HALLMARK_E2F_TARGETS                       | 198  | -0.1837773 | -0.6478955 | 0.9976134  | 0.97766256 | 1          | 3446 tags=22%, list=26%, signal=30% |
