# Supplementary material for: A Stem-like Patient-Derived Ovarian Cancer Model of Platinum Resistance Reveals Dissociation of Stemness and Resistance
Source: MDPI journal article supplement (doi:10.3390/ijms25073843), 2024-03-29
Supplement: s1 [file s1]

**Table S7.** Primer sequences for RT-qPCR. Amplicon length displayed under gene name.

| <b>Gene</b>                        | <b>Forward Primer Sequence<br/>(5' – 3')</b> | <b>Reverse Primer Sequence<br/>(5' – 3')</b> |
|------------------------------------|----------------------------------------------|----------------------------------------------|
| <b><i>ABCC2</i><br/>(131 bp)</b>   | CCC TGC TGT TCG ATA TAC CAA TC               | TCG AGA GAA TCC AGA ATA GGG<br>AC            |
| <b><i>ACTB</i><br/>(151 bp)</b>    | TGA AGT GTG ACG TGG ACA TC                   | GGA GGA GCA ATG ATC TTG AT                   |
| <b><i>ATP7A</i><br/>(73 bp)</b>    | AGC AAT TGC TTC ATC TG                       | GCA GGC AGT TCA TAA CTC TCG                  |
| <b><i>ATP7B</i><br/>(145 bp)</b>   | TCT CTG GTC ATC CTG GTG GTT                  | GGG CTT CTG AGG TTT TGC TCT                  |
| <b><i>CD44</i><br/>(213 bp)</b>    | TGG CAC CCG CTA TGT CCA                      | GTA GCA GGG ATT CTG TCT G                    |
| <b><i>CDH1</i><br/>(291 bp)</b>    | GAG AAA CAG GAT GGC TGA AGG                  | TGA GGA TGG TGT AAG CGA TGG                  |
| <b><i>CDH2</i><br/>(122 bp)</b>    | GAG GAG TCA GTG AAG GAG TCA                  | GGG AAG TTG ATT GGA GGG ATG                  |
| <b><i>LIN28A</i><br/>(128 bp)</b>  | GAG CAT GCA GAA GCG CAG ATC A                | TAT GGC TGA TGC TCT GGC AGA A                |
| <b><i>LIN28B</i><br/>(128 bp)</b>  | GCC CCT TGG ATA TTC CAG TC                   | TGA CTC AAG GCC TTT GGA AG                   |
| <b><i>NANOG</i><br/>(158 bp)</b>   | CAA AGG CAA ACA ACC CAC TT                   | TCT GCT GGA GGC TGA GGT AT                   |
| <b><i>POU5F1</i><br/>(163 bp)</b>  | AAG CGA TCA AGC AGC GAC TAT                  | GGA AAG GGA CCG AGG AGT ACA                  |
| <b><i>SLC31A1</i><br/>(167 bp)</b> | GGG GAT GAG CTA TAT GGA CTC C                | TCA CCA AAC CGG AAA ACA GTA G                |
| <b><i>SNAI1</i><br/>(113 bp)</b>   | CAC TAT GCC GCG CTC TTT C                    | GGT CGT AGG GCT GCT GGA A                    |
| <b><i>SNAI2</i><br/>(119 bp)</b>   | AAG CAT TTC AAC GCC TCC AAA                  | AGG ATC TCT GGT TGT GGT ATG AC               |
| <b><i>SOX2</i><br/>(140 bp)</b>    | GCG CCC TGC AGT ACA ACT C                    | GCT GGC CTC GGA CTT GAC                      |
| <b><i>TWIST1</i><br/>(201 bp)</b>  | GGA GTC CGC AGT CTT ACG AG                   | TCT GGA GGA CCT GGT AGA GG                   |
| <b><i>VIM</i><br/>(183 bp)</b>     | GGT GGA CCA GCT AAC CAA CGA                  | TCA AGG TCA AGA CGT GCC AGA                  |
| <b><i>ZEB1</i><br/>(141 bp)</b>    | GCA CAA GAA GAG CCA CAA GTA                  | GCA AGA CAA GTT CAA GGG TTC                  |
| <b><i>ZEB2</i><br/>(160 bp)</b>    | TTC CTG GGC TAC GAC CAT AC                   | TGT GCT CCA TCA AGC AAT TC                   |
