# Supplementary material for: A Stem-like Patient-Derived Ovarian Cancer Model of Platinum Resistance Reveals Dissociation of Stemness and Resistance
Source: MDPI journal article supplement (doi:10.3390/ijms25073843), 2024-03-29
Supplement: s1 [file s1]

**Table S2.** Subset of genes differentially expressed in RNA-seq that are associated with cancer stemness, epithelial-mesenchymal transition, and cisplatin resistance

| ENSEMBL ID      | Gene Symbol | log2FoldChange | P-Value     | Adj. P-Value | Correlation                         |
|-----------------|-------------|----------------|-------------|--------------|-------------------------------------|
| ENSG00000182621 | PLCB1       | 8.356265503    | 2.01225E-58 | 2.57065E-56  | Stemness                            |
| ENSG00000067066 | SP100       | 8.082933832    | 5.25858E-15 | 1.25839E-13  | Stemness                            |
| ENSG00000071575 | TRIB2       | 6.20964948     | 2.4397E-70  | 3.98493E-68  | Cisplatin Resistance, Stemness      |
| ENSG00000183971 | NPW         | 6.06781425     | 2.2249E-102 | 6.1282E-100  | Stemness                            |
| ENSG00000084636 | COL16A1     | 5.754984029    | 1.1499E-198 | 9.5012E-196  | EMT, Stemness                       |
| ENSG00000040731 | CDH10       | 5.65704701     | 6.72638E-39 | 5.0527E-37   | Stemness                            |
| ENSG00000024422 | EHD2        | 5.404936271    | 4.75805E-51 | 5.2627E-49   | Stemness                            |
| ENSG00000165379 | LRFN5       | 5.371701094    | 1.8727E-160 | 1.0522E-157  | Stemness                            |
| ENSG00000185008 | ROBO2       | 5.315643924    | 5.24846E-80 | 9.70067E-78  | Stemness                            |
| ENSG00000118785 | SPP1        | 4.939013763    | 8.0586E-98  | 1.95171E-95  | Cisplatin Resistance, EMT, Stemness |
| ENSG00000170396 | ZNF804A     | 4.802047513    | 0           | 0            | Stemness                            |
| ENSG00000064763 | FAR2        | 4.4161414      | 3.60164E-31 | 2.0566E-29   | Stemness                            |
| ENSG00000141837 | CACNA1A     | 4.409561452    | 3.9282E-112 | 1.1996E-109  | Stemness                            |
| ENSG00000001084 | GCLC        | 4.21014563     | 0           | 0            | Cisplatin Resistance, Stemness      |
| ENSG00000154122 | ANKH        | 3.902398136    | 2.29728E-34 | 1.44708E-32  | Stemness                            |
| ENSG00000145147 | SLIT2       | -5.515043392   | 1.86557E-54 | 2.20216E-52  | EMT, Stemness                       |
| ENSG00000135333 | EPHA7       | -5.633873415   | 6.31167E-66 | 9.63696E-64  | Stemness                            |
| ENSG00000137872 | SEMA6D      | -5.736345708   | 4.07951E-57 | 5.02674E-55  | Stemness                            |
| ENSG00000079385 | CEACAM1     | -6.129294961   | 1.25868E-61 | 1.71657E-59  | EMT, Stemness                       |
| ENSG00000115828 | QPCT        | -6.228380664   | 1.30957E-20 | 4.58742E-19  | Stemness                            |
| ENSG00000156103 | MMP16       | -6.39045084    | 1.11187E-17 | 3.22028E-16  | Stemness                            |
| ENSG00000163132 | MSX1        | -6.42503743    | 2.32125E-95 | 5.43444E-93  | Cisplatin Resistance, Stemness      |
| ENSG00000186197 | EDARADD     | -6.757327566   | 8.21212E-38 | 5.94616E-36  | Stemness                            |
| ENSG00000182568 | SATB1       | -7.393480032   | 8.89177E-24 | 3.66284E-22  | EMT, Stemness                       |
| ENSG00000137203 | TFAP2A      | -7.528844143   | 2.62135E-30 | 1.444E-28    | Stemness                            |
| ENSG00000134853 | PDGFRA      | -7.560090284   | 7.77318E-14 | 1.71144E-12  | EMT, Stemness                       |
| ENSG00000007372 | PAX6        | -7.57531094    | 1.27013E-59 | 1.65199E-57  | Stemness                            |
| ENSG00000122870 | BICC1       | -7.969495544   | 2.57203E-15 | 6.36078E-14  | EMT, Stemness                       |
| ENSG00000075213 | SEMA3A      | -8.186816235   | 7.12969E-12 | 1.27418E-10  | Stemness                            |
| ENSG00000182263 | FIGN        | -8.199552815   | 6.18455E-12 | 1.11377E-10  | Stemness                            |
| ENSG00000176907 | TCIM        | -9.017917239   | 4.27281E-14 | 9.74354E-13  | Stemness                            |
| ENSG00000157110 | RBPM5       | -9.451583696   | 1.51139E-15 | 3.80476E-14  | Stemness                            |
| ENSG00000114251 | WNT5A       | -10.31533138   | 3.34841E-18 | 1.02028E-16  | EMT, Stemness                       |
