# Supplementary material for: A Stem-like Patient-Derived Ovarian Cancer Model of Platinum Resistance Reveals Dissociation of Stemness and Resistance
Source: MDPI journal article supplement (doi:10.3390/ijms25073843), 2024-03-29
Supplement: s1 [file s1]

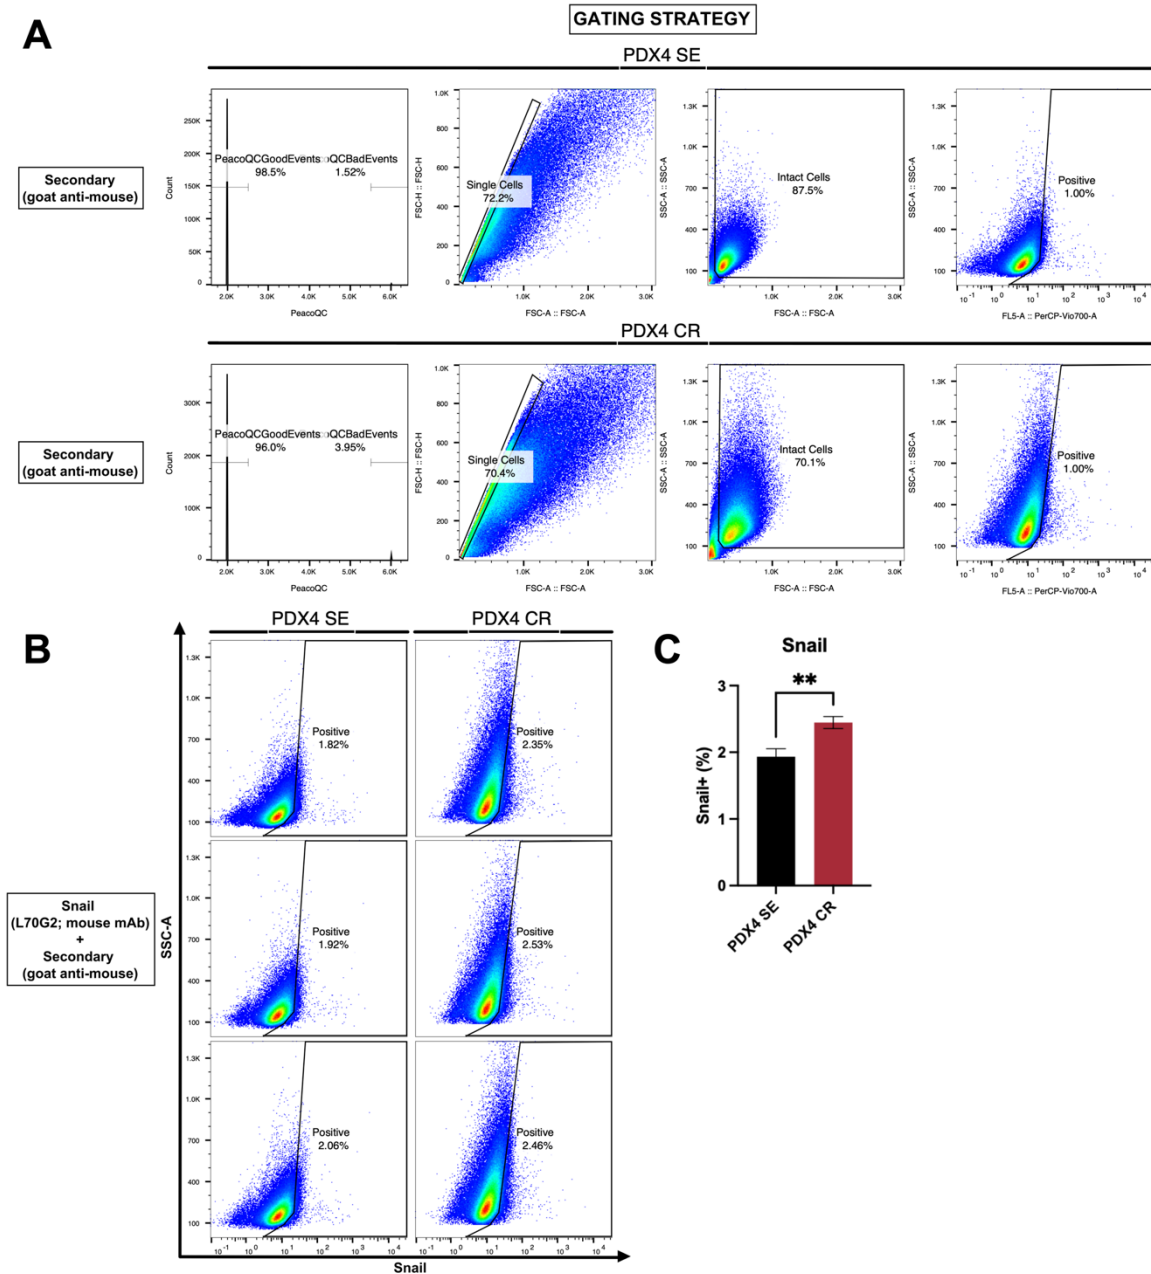

**Figure S3. Quantification of Snail expression with flow cytometry. A.** Gating strategy for the identification of positive population relative to populations stained with only secondary antibody. **B.** Dot plots demonstrating proportion of Snail positive cells. **C.** Bar chart depicting PDX4 CR with a significantly higher expression of Snail when compared to PDX4 SE.
