# Supplementary material for: A Stem-like Patient-Derived Ovarian Cancer Model of Platinum Resistance Reveals Dissociation of Stemness and Resistance
Source: MDPI journal article supplement (doi:10.3390/ijms25073843), 2024-03-29
Supplement: s1 [file s1]

**A**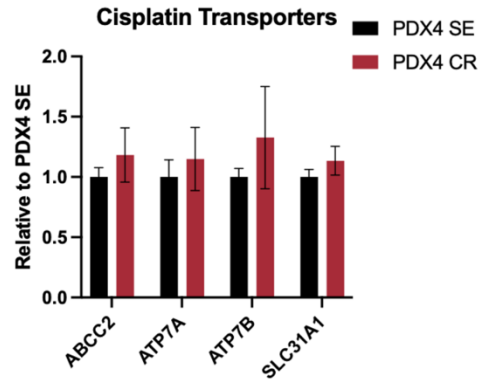**B**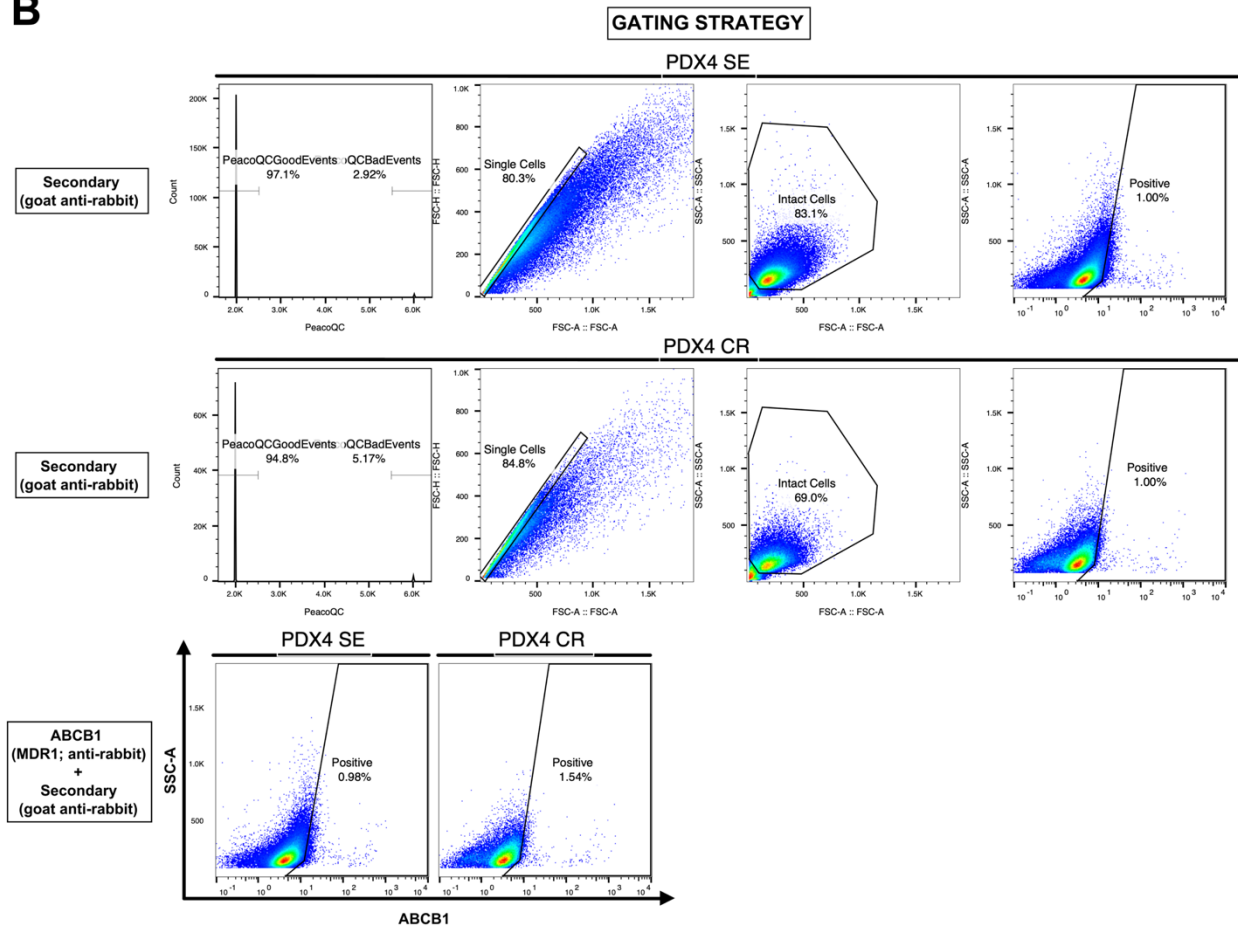

**Figure S7. Quantification of cisplatin/copper transporter expression. A.** RT-qPCR quantification of ABCC2, ATP7A, ATP7B, SLC31A1. **B.** Gating strategy and quantification of ABCB1/MDR1 through flow cytometry.
