# Supplementary material for: A Stem-like Patient-Derived Ovarian Cancer Model of Platinum Resistance Reveals Dissociation of Stemness and Resistance
Source: MDPI journal article supplement (doi:10.3390/ijms25073843), 2024-03-29
Supplement: s1 [file s1]

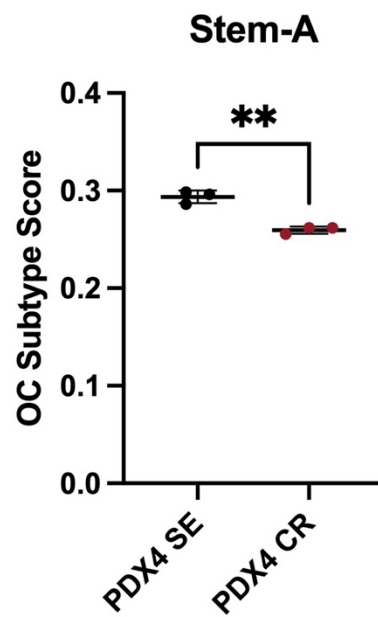

**Figure S5. Ovarian cancer molecular subtype classification.** PDX4 SE has a stronger Stem-A signature compared to PDX4 CR.
