# Supplementary material for: A Stem-like Patient-Derived Ovarian Cancer Model of Platinum Resistance Reveals Dissociation of Stemness and Resistance
Source: MDPI journal article supplement (doi:10.3390/ijms25073843), 2024-03-29
Supplement: s1 [file s1]

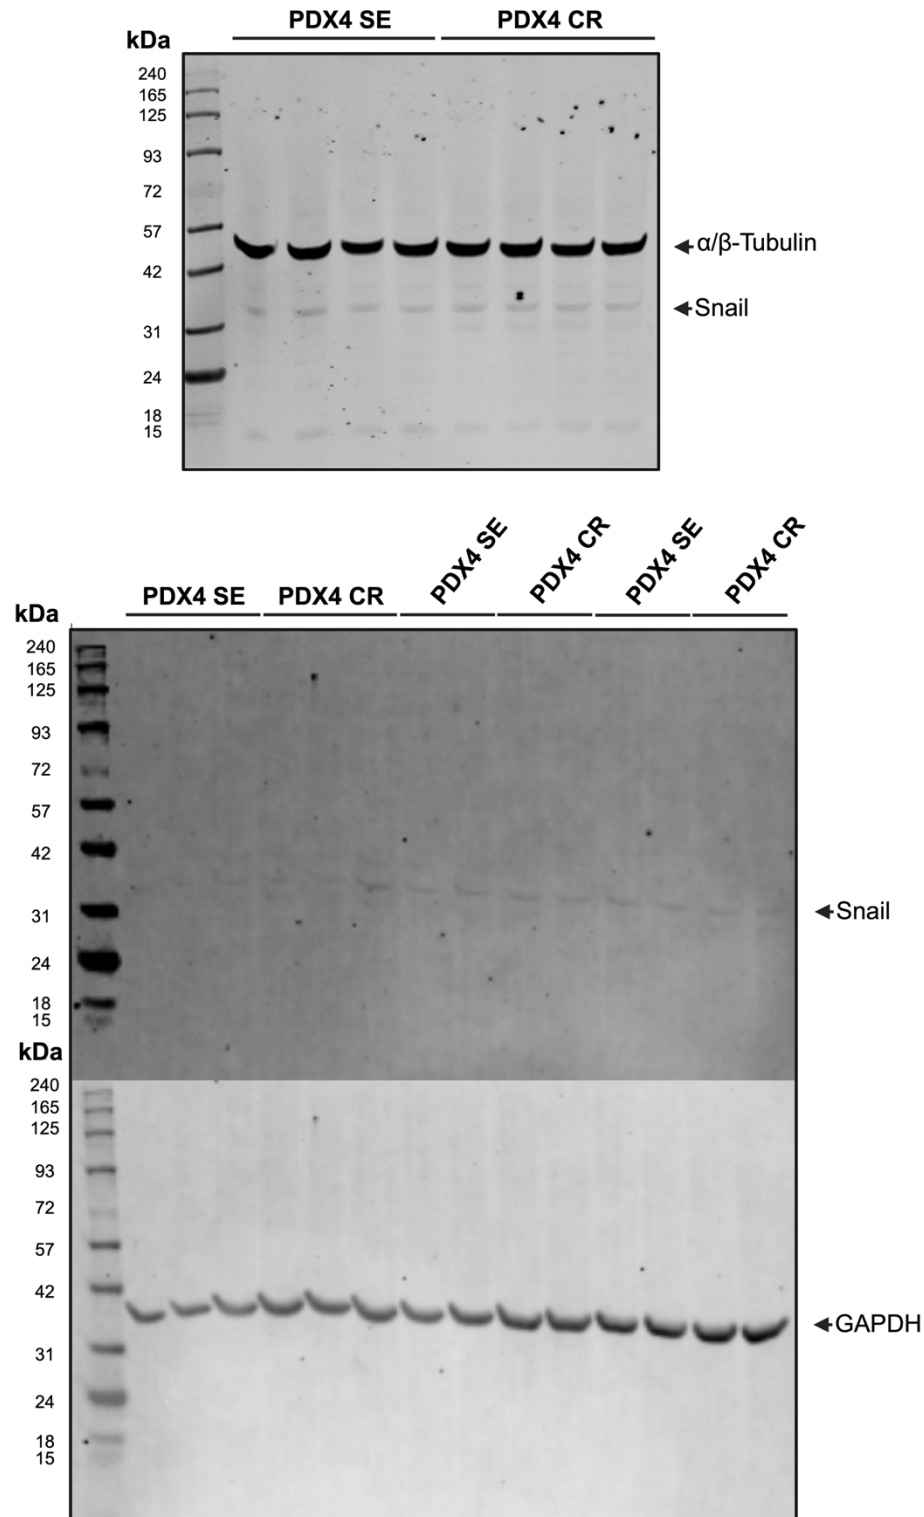

**Figure S1. Snail Western blots.** Whole protein was extracted from PDX4 SE and CR. After protein quantification with BCA protein assay, fifty micrograms of protein was added per lane and electrophoresed for 1 hr and 50 min. Protein transfer to PVDF membranes was done using Genscript's eBlot™ L1 Fast Transfer System with the manufacturer's recommended settings. Membranes were then probed with anti-Snail and anti-Tubulin/Gapdh (internal controls), washed, and scanned with Licor Odyssey DLx Imager.
