# Supplementary material for: A Stem-like Patient-Derived Ovarian Cancer Model of Platinum Resistance Reveals Dissociation of Stemness and Resistance
Source: MDPI journal article supplement (doi:10.3390/ijms25073843), 2024-03-29
Supplement: s1 [file s1]

**Table S5.** Top hits for hallmark pathways in gene set enrichment analysis for PDX4 CR.

| NAME                                     | SIZE | ES         | NES       | NOM p-val  | FDR q-val  | FWER p-val | RANK AT MAX LEADING EDGE            |
|------------------------------------------|------|------------|-----------|------------|------------|------------|-------------------------------------|
| HALLMARK_INTERFERON_ALPHA_RESPONSE       | 72   | 0.63786113 | 2.306093  | 0          | 0          | 0          | 1090 tags=43%, list=8%, signal=47%  |
| HALLMARK_MYC_TARGETS_V1                  | 200  | 0.5149191  | 2.1980624 | 0          | 0          | 0          | 4457 tags=60%, list=34%, signal=89% |
| HALLMARK_INTERFERON_GAMMA_RESPONSE       | 132  | 0.5243855  | 2.0870988 | 0          | 0          | 0          | 1556 tags=39%, list=12%, signal=44% |
| HALLMARK_MYC_TARGETS_V2                  | 58   | 0.537346   | 1.8659847 | 0          | 0.00289367 | 0.006      | 3958 tags=62%, list=30%, signal=88% |
| HALLMARK_APOPTOSIS                       | 126  | 0.39773452 | 1.5908104 | 0          | 0.03245121 | 0.081      | 1480 tags=25%, list=11%, signal=27% |
| HALLMARK_OXIDATIVE_PHOSPHORYLATION       | 196  | 0.34320012 | 1.4486942 | 0          | 0.08995173 | 0.245      | 3593 tags=39%, list=27%, signal=53% |
| HALLMARK_KRAS_SIGNALING_UP               | 94   | 0.37426615 | 1.3925596 | 0.04291846 | 0.11573479 | 0.347      | 877 tags=18%, list=7%, signal=19%   |
| HALLMARK_GLYCOLYSIS                      | 162  | 0.31592062 | 1.3067553 | 0.04188482 | 0.19214387 | 0.562      | 2603 tags=33%, list=20%, signal=40% |
| HALLMARK_CHOLESTEROL_HOMEOSTASIS         | 68   | 0.35949185 | 1.2871991 | 0.08185054 | 0.19339053 | 0.604      | 1642 tags=24%, list=12%, signal=27% |
| HALLMARK_TNFA_SIGNALING_VIA_NFKB         | 145  | 0.3169191  | 1.2808524 | 0.05913978 | 0.18159954 | 0.617      | 2423 tags=35%, list=18%, signal=43% |
| HALLMARK_SPERMATOGENESIS                 | 70   | 0.34449476 | 1.2599834 | 0.09747292 | 0.19064651 | 0.665      | 1500 tags=20%, list=11%, signal=22% |
| HALLMARK_REACTIVE_OXYGEN_SPECIES_PATHWAY | 46   | 0.36971268 | 1.2343553 | 0.169279   | 0.21463448 | 0.732      | 2517 tags=35%, list=19%, signal=43% |
| HALLMARK_PEROXISOME                      | 83   | 0.32535616 | 1.1965047 | 0.16666667 | 0.259604   | 0.823      | 867 tags=13%, list=7%, signal=14%   |
| HALLMARK_P53_PATHWAY                     | 168  | 0.2819077  | 1.1662177 | 0.11827957 | 0.28872156 | 0.88       | 3061 tags=31%, list=23%, signal=40% |
| HALLMARK_ALLOGRAFT_REJECTION             | 92   | 0.30337194 | 1.1165661 | 0.21722846 | 0.363785   | 0.946      | 1710 tags=25%, list=13%, signal=29% |
| HALLMARK_DNA_REPAIR                      | 144  | 0.27842268 | 1.1086253 | 0.2393617  | 0.35714132 | 0.951      | 2180 tags=20%, list=17%, signal=24% |
| HALLMARK_ANDROGEN_RESPONSE               | 85   | 0.30064085 | 1.1042707 | 0.2644628  | 0.34763595 | 0.959      | 717 tags=13%, list=5%, signal=14%   |
| HALLMARK_MTORC1_SIGNALING                | 190  | 0.2654577  | 1.1040522 | 0.18817204 | 0.3285189  | 0.959      | 2320 tags=24%, list=18%, signal=29% |
| HALLMARK_PI3K_AKT_MTOR_SIGNALING         | 84   | 0.29097688 | 1.0722754 | 0.31707317 | 0.37383735 | 0.977      | 1480 tags=13%, list=11%, signal=15% |
| HALLMARK_TGF_BETA_SIGNALING              | 49   | 0.3232918  | 1.0619392 | 0.3277592  | 0.37499785 | 0.983      | 747 tags=10%, list=6%, signal=11%   |
| HALLMARK_PROTEIN_SECRETION               | 90   | 0.28311387 | 1.0564181 | 0.33204633 | 0.36889958 | 0.984      | 3828 tags=38%, list=29%, signal=53% |
| HALLMARK_FATTY_ACID_METABOLISM           | 121  | 0.21440676 | 0.8489165 | 0.85096157 | 0.82475466 | 1          | 3666 tags=36%, list=28%, signal=49% |
| HALLMARK_UNFOLDED_PROTEIN_RESPONSE       | 108  | 0.20879067 | 0.8070447 | 0.8836207  | 0.86422765 | 1          | 1976 tags=20%, list=15%, signal=24% |
